# Supplementary material for: Halogen Bonding Involving Isomeric Isocyanide/Nitrile Groups
Source: Preprints.org preprint supplement (doi:10.20944/preprints202307.1937.v1), 2023-07-28
Supplement: Supplementary file 7 [file supplementary]

Archive with 14 entries (14 files):
- A118.cif
- __MACOSX/._A118.cif
- a231.cif
- __MACOSX/._a231.cif
- checkcif_a118.pdf
- __MACOSX/._checkcif_a118.pdf
- checkcif_a231.pdf
- __MACOSX/._checkcif_a231.pdf
- checkcif_a389.pdf
- __MACOSX/._checkcif_a389.pdf
- ESI_SUBM.docx
- __MACOSX/._ESI_SUBM.docx
- A389_beaker_auto.cif
- __MACOSX/._A389_beaker_auto.cif
