# Supplementary material for: Halogen Bonding Involving Isomeric Isocyanide/Nitrile Groups
Source: Preprints.org preprint supplement (doi:10.20944/preprints202307.1937.v1), 2023-07-28
Supplement: Supplementary file 7 [file supplementary › A118.cif]

data_1ver0-22059_a#118
_audit_creation_date               2023-07-07
_audit_creation_method
;
Olex2 1.5
(compiled 2023.03.06 svn.rbb2c1857 for OlexSys, GUI svn.r6748)
;
_shelx_SHELXL_version_number       '2019/2'
_audit_contact_author_address      ?
_audit_contact_author_email        ?
_audit_contact_author_name         ''
_audit_contact_author_phone        ?
_publ_contact_author_id_orcid      ?
_publ_section_references
;
Dolomanov, O.V., Bourhis, L.J., Gildea, R.J, Howard, J.A.K. & Puschmann, H.
 (2009), J. Appl. Cryst. 42, 339-341.

Sheldrick, G.M. (2015). Acta Cryst. A71, 3-8.

Sheldrick, G.M. (2015). Acta Cryst. C71, 3-8.
;
_chemical_name_common              ?
_chemical_name_systematic          ?
_chemical_formula_moiety           'C6 F3 I3, 2(C6 H6 N)'
_chemical_formula_sum              'C18 H12 F3 I3 N2'
_chemical_formula_weight           694.00
_chemical_melting_point            ?
loop_
  _atom_type_symbol
  _atom_type_description
  _atom_type_scat_dispersion_real
  _atom_type_scat_dispersion_imag
  _atom_type_scat_source
 'C' 'C' 0.0181 0.0091 'International Tables Vol C Tables 4.2.6.8 and 6.1.1.4'
 'H' 'H' 0.0000 0.0000 'International Tables Vol C Tables 4.2.6.8 and 6.1.1.4'
 'F' 'F' 0.0727 0.0534 'International Tables Vol C Tables 4.2.6.8 and 6.1.1.4'
 'I' 'I' -0.3257 6.8362 'International Tables Vol C Tables 4.2.6.8 and 6.1.1.4'
 'N' 'N' 0.0311 0.0180 'International Tables Vol C Tables 4.2.6.8 and 6.1.1.4'

_shelx_space_group_comment
;
The symmetry employed for this shelxl refinement is uniquely defined
by the following loop, which should always be used as a source of
symmetry information in preference to the above space-group names.
They are only intended as comments.
;
_space_group_crystal_system        'monoclinic'
_space_group_IT_number             14
_space_group_name_H-M_alt          'P 1 21/c 1'
_space_group_name_Hall             '-P 2ybc'
loop_
  _space_group_symop_operation_xyz
 'x, y, z'
 '-x, y+1/2, -z+1/2'
 '-x, -y, -z'
 'x, -y-1/2, z-1/2'

_cell_length_a                     13.2428(2)
_cell_length_b                     17.1531(3)
_cell_length_c                     9.4351(2)
_cell_angle_alpha                  90
_cell_angle_beta                   107.514(2)
_cell_angle_gamma                  90
_cell_volume                       2043.88(7)
_cell_formula_units_Z              4
_cell_measurement_reflns_used      7825
_cell_measurement_temperature      100.15
_cell_measurement_theta_max        69.0140
_cell_measurement_theta_min        3.4820
_shelx_estimated_absorpt_T_max     ?
_shelx_estimated_absorpt_T_min     ?
_exptl_absorpt_coefficient_mu      36.316
_exptl_absorpt_correction_T_max    1.00000
_exptl_absorpt_correction_T_min    0.10090
_exptl_absorpt_correction_type     multi-scan
_exptl_absorpt_process_details     ?
_exptl_absorpt_special_details     ?
_exptl_crystal_colour              'clear colourless'
_exptl_crystal_colour_lustre       clear
_exptl_crystal_colour_modifier     .
_exptl_crystal_colour_primary      colourless
_exptl_crystal_density_diffrn      2.255
_exptl_crystal_density_meas        ?
_exptl_crystal_density_method      ?
_exptl_crystal_description         prism
_exptl_crystal_F_000               1280
_exptl_crystal_recrystallization_method  ?
_exptl_crystal_size_max            0.12
_exptl_crystal_size_mid            0.07
_exptl_crystal_size_min            0.03
_exptl_transmission_factor_max     ?
_exptl_transmission_factor_min     ?
_diffrn_reflns_av_R_equivalents    0.0458
_diffrn_reflns_av_unetI/netI       0.0410
_diffrn_reflns_Laue_measured_fraction_full  0.999
_diffrn_reflns_Laue_measured_fraction_max  0.998
_diffrn_reflns_limit_h_max         16
_diffrn_reflns_limit_h_min         -15
_diffrn_reflns_limit_k_max         20
_diffrn_reflns_limit_k_min         -19
_diffrn_reflns_limit_l_max         10
_diffrn_reflns_limit_l_min         -11
_diffrn_reflns_number              10729
_diffrn_reflns_point_group_measured_fraction_full  0.999
_diffrn_reflns_point_group_measured_fraction_max  0.998
_diffrn_reflns_theta_full          67.684
_diffrn_reflns_theta_max           69.168
_diffrn_reflns_theta_min           3.500
_diffrn_ambient_temperature        100.15
_diffrn_detector_area_resol_mean   ?
_diffrn_measured_fraction_theta_full  0.999
_diffrn_measured_fraction_theta_max  0.998
_diffrn_measurement_device_type    'SuperNova, Single source at offset/far, HyPix3000'
_diffrn_measurement_method         '\w scans'
_diffrn_radiation_type             CuK\a
_diffrn_radiation_wavelength       1.54184
_diffrn_source                     ?
_reflns_Friedel_coverage           0.000
_reflns_Friedel_fraction_full      .
_reflns_Friedel_fraction_max       .
_reflns_number_gt                  3614
_reflns_number_total               3818
_reflns_special_details
;
 Reflections were merged by SHELXL according to the crystal
 class for the calculation of statistics and refinement.
 
 _reflns_Friedel_fraction is defined as the number of unique
 Friedel pairs measured divided by the number that would be
 possible theoretically, ignoring centric projections and
 systematic absences.
;
_reflns_threshold_expression       'I > 2\s(I)'
_computing_cell_refinement         ?
_computing_data_collection         ?
_computing_data_reduction          ?
_computing_molecular_graphics      'Olex2 1.5 (Dolomanov et al., 2009)'
_computing_publication_material    'Olex2 1.5 (Dolomanov et al., 2009)'
_computing_structure_refinement    'SHELXL 2019/2 (Sheldrick, 2015)'
_computing_structure_solution      'SHELXT 2014/5 (Sheldrick, 2014)'
_refine_diff_density_max           1.034
_refine_diff_density_min           -2.019
_refine_diff_density_rms           0.250
_refine_ls_extinction_coef         .
_refine_ls_extinction_method       none
_refine_ls_goodness_of_fit_ref     1.052
_refine_ls_hydrogen_treatment      constr
_refine_ls_matrix_type             full
_refine_ls_number_parameters       239
_refine_ls_number_reflns           3818
_refine_ls_number_restraints       0
_refine_ls_R_factor_all            0.0383
_refine_ls_R_factor_gt             0.0369
_refine_ls_restrained_S_all        1.052
_refine_ls_shift/su_max            0.001
_refine_ls_shift/su_mean           0.000
_refine_ls_structure_factor_coef   Fsqd
_refine_ls_weighting_details      
 'w=1/[\s^2^(Fo^2^)+(0.0674P)^2^] where P=(Fo^2^+2Fc^2^)/3'
_refine_ls_weighting_scheme        calc
_refine_ls_wR_factor_gt            0.0950
_refine_ls_wR_factor_ref           0.0965
_refine_special_details            ?
_olex2_refinement_description
;
1.a Idealised Me refined as rotating group:
 C5(H5A,H5B,H5C), C6(H6A,H6B,H6C), C11(H11A,H11B,H11C), C12(H12B,H12A,H12C)
;
_atom_sites_solution_hydrogens     geom
_atom_sites_solution_primary       dual
_atom_sites_solution_secondary     ?
loop_
  _atom_site_label
  _atom_site_type_symbol
  _atom_site_fract_x
  _atom_site_fract_y
  _atom_site_fract_z
  _atom_site_U_iso_or_equiv
  _atom_site_adp_type
  _atom_site_occupancy
  _atom_site_site_symmetry_order
  _atom_site_calc_flag
  _atom_site_refinement_flags_posn
  _atom_site_refinement_flags_adp
  _atom_site_refinement_flags_occupancy
  _atom_site_disorder_assembly
  _atom_site_disorder_group
 I1 I 0.50863(2) 0.45355(2) 0.22553(3) 0.01332(11) Uani 1 1 d . . . . .
 I2 I 0.24644(2) 0.74561(2) 0.04827(3) 0.01142(11) Uani 1 1 d . . . . .
 I3 I 0.62678(2) 0.74546(2) 0.59870(3) 0.01198(11) Uani 1 1 d . . . . .
 F1 F 0.33113(19) 0.57234(15) 0.0538(3) 0.0137(5) Uani 1 1 d . . . . .
 F2 F 0.42006(19) 0.79735(14) 0.3484(3) 0.0132(5) Uani 1 1 d . . . . .
 F3 F 0.62406(19) 0.57027(16) 0.4833(3) 0.0145(5) Uani 1 1 d . . . . .
 C13 C 0.4779(3) 0.5689(3) 0.2684(4) 0.0074(7) Uani 1 1 d . . . . .
 C14 C 0.3934(3) 0.6091(3) 0.1735(4) 0.0097(8) Uani 1 1 d . . . . .
 C15 C 0.3710(3) 0.6858(3) 0.1989(4) 0.0099(8) Uani 1 1 d . . . . .
 C16 C 0.4380(3) 0.7220(3) 0.3225(4) 0.0081(8) Uani 1 1 d . . . . .
 C17 C 0.5244(3) 0.6851(3) 0.4207(4) 0.0110(8) Uani 1 1 d . . . . .
 C18 C 0.5417(3) 0.6086(2) 0.3909(4) 0.0094(7) Uani 1 1 d . . . . .
 N1 N 1.0570(3) 0.6148(2) 1.2139(4) 0.0141(7) Uani 1 1 d . . . . .
 C1 C 1.0819(4) 0.6612(3) 1.3067(5) 0.0199(10) Uani 1 1 d . . . . .
 C2 C 1.0282(3) 0.5566(3) 1.1049(5) 0.0114(8) Uani 1 1 d . . . . .
 C3 C 0.9352(3) 0.5679(3) 0.9871(5) 0.0113(8) Uani 1 1 d . . . . .
 C4 C 0.9068(3) 0.5094(3) 0.8789(5) 0.0109(8) Uani 1 1 d . . . . .
 C5 C 0.8675(4) 0.6388(3) 0.9774(5) 0.0217(10) Uani 1 1 d . . . . .
 H5A H 0.893150 0.669004 1.069442 0.033 Uiso 1 1 calc R U . . .
 H5B H 0.794020 0.622902 0.963237 0.033 Uiso 1 1 calc R U . . .
 H5C H 0.870968 0.670946 0.893114 0.033 Uiso 1 1 calc R U . . .
 C6 C 0.8073(3) 0.5181(3) 0.7490(5) 0.0191(9) Uani 1 1 d . . . . .
 H6A H 0.820239 0.555079 0.677256 0.029 Uiso 1 1 calc R U . . .
 H6B H 0.749718 0.537486 0.784714 0.029 Uiso 1 1 calc R U . . .
 H6C H 0.787541 0.467337 0.700980 0.029 Uiso 1 1 calc R U . . .
 N2 N 0.1586(3) 0.3936(2) -0.3813(4) 0.0143(7) Uani 1 1 d . . . . .
 C7 C 0.2211(4) 0.3465(3) -0.3310(5) 0.0221(10) Uani 1 1 d . . . . .
 C8 C 0.0785(3) 0.4485(2) -0.4436(5) 0.0099(8) Uani 1 1 d . . . . .
 C9 C -0.0010(3) 0.4269(3) -0.5724(4) 0.0101(8) Uani 1 1 d . . . . .
 C10 C 0.0838(3) 0.5199(3) -0.3699(5) 0.0102(8) Uani 1 1 d . . . . .
 C11 C 0.0015(3) 0.3485(3) -0.6416(5) 0.0160(9) Uani 1 1 d . . . . .
 H11A H 0.074545 0.329348 -0.613737 0.024 Uiso 1 1 calc R U . . .
 H11B H -0.025965 0.353095 -0.750034 0.024 Uiso 1 1 calc R U . . .
 H11C H -0.042505 0.311926 -0.606431 0.024 Uiso 1 1 calc R U . . .
 C12 C 0.1740(3) 0.5406(3) -0.2337(5) 0.0156(9) Uani 1 1 d . . . . .
 H12B H 0.225013 0.497569 -0.209835 0.023 Uiso 1 1 calc R U . . .
 H12A H 0.146342 0.549681 -0.149762 0.023 Uiso 1 1 calc R U . . .
 H12C H 0.209068 0.587901 -0.253236 0.023 Uiso 1 1 calc R U . . .

loop_
  _atom_site_aniso_label
  _atom_site_aniso_U_11
  _atom_site_aniso_U_22
  _atom_site_aniso_U_33
  _atom_site_aniso_U_23
  _atom_site_aniso_U_13
  _atom_site_aniso_U_12
 I1 0.01576(17) 0.00637(16) 0.01903(18) -0.00104(9) 0.00706(12) 0.00245(9)
 I2 0.00967(17) 0.01186(17) 0.01357(18) 0.00434(9) 0.00477(13) 0.00461(8)
 I3 0.01045(18) 0.01341(18) 0.01245(18) -0.00462(9) 0.00403(13) -0.00518(8)
 F1 0.0122(11) 0.0128(12) 0.0129(12) -0.0031(10) -0.0010(9) 0.0005(10)
 F2 0.0162(11) 0.0050(11) 0.0199(12) -0.0019(10) 0.0078(10) -0.0004(9)
 F3 0.0110(11) 0.0155(12) 0.0144(12) 0.0016(10) -0.0003(9) 0.0036(10)
 C13 0.0095(17) 0.0044(17) 0.010(2) -0.0001(15) 0.0046(15) -0.0007(15)
 C14 0.0092(17) 0.0099(19) 0.0100(18) 0.0007(16) 0.0030(15) 0.0008(15)
 C15 0.0065(16) 0.010(2) 0.0136(19) 0.0039(16) 0.0039(14) 0.0010(15)
 C16 0.0105(19) 0.0023(19) 0.015(2) 0.0014(14) 0.0098(17) 0.0009(14)
 C17 0.0098(18) 0.014(2) 0.0099(18) -0.0044(16) 0.0038(14) -0.0056(16)
 C18 0.0087(17) 0.0090(19) 0.0104(18) 0.0008(16) 0.0026(15) 0.0008(15)
 N1 0.0133(16) 0.0160(19) 0.0133(17) -0.0001(15) 0.0044(14) -0.0039(14)
 C1 0.027(2) 0.019(2) 0.016(2) -0.0021(19) 0.0093(18) -0.0082(19)
 C2 0.013(2) 0.013(2) 0.0090(19) -0.0020(15) 0.0048(16) -0.0049(16)
 C3 0.0078(18) 0.0147(19) 0.012(2) 0.0045(17) 0.0046(16) 0.0018(16)
 C4 0.0068(18) 0.015(2) 0.0122(19) 0.0039(16) 0.0042(15) -0.0007(15)
 C5 0.024(2) 0.016(2) 0.024(2) 0.0006(19) 0.0049(19) 0.0074(19)
 C6 0.0118(19) 0.030(3) 0.014(2) 0.002(2) 0.0005(17) -0.0012(19)
 N2 0.0105(16) 0.0140(18) 0.0179(18) 0.0058(15) 0.0037(14) 0.0029(15)
 C7 0.021(2) 0.023(2) 0.021(2) 0.006(2) 0.0044(18) 0.002(2)
 C8 0.0071(18) 0.011(2) 0.014(2) 0.0057(15) 0.0064(16) 0.0006(14)
 C9 0.0095(18) 0.013(2) 0.0085(19) 0.0017(16) 0.0033(15) -0.0029(16)
 C10 0.0066(17) 0.014(2) 0.0121(19) 0.0013(17) 0.0054(15) -0.0044(16)
 C11 0.0153(19) 0.012(2) 0.021(2) -0.0010(18) 0.0059(17) -0.0019(17)
 C12 0.013(2) 0.017(2) 0.014(2) -0.0006(17) -0.0017(17) -0.0039(16)

_geom_special_details
;
 All esds (except the esd in the dihedral angle between two l.s. planes)
 are estimated using the full covariance matrix.  The cell esds are taken
 into account individually in the estimation of esds in distances, angles
 and torsion angles; correlations between esds in cell parameters are only
 used when they are defined by crystal symmetry.  An approximate (isotropic)
 treatment of cell esds is used for estimating esds involving l.s. planes.
;
loop_
  _geom_bond_atom_site_label_1
  _geom_bond_atom_site_label_2
  _geom_bond_distance
  _geom_bond_site_symmetry_2
  _geom_bond_publ_flag
 I1 C13 2.083(4) . ?
 I2 C15 2.093(4) . ?
 I3 C17 2.088(4) . ?
 F1 C14 1.339(5) . ?
 F2 C16 1.350(5) . ?
 F3 C18 1.345(5) . ?
 C13 C14 1.389(6) . ?
 C13 C18 1.388(6) . ?
 C14 C15 1.386(6) . ?
 C15 C16 1.382(6) . ?
 C16 C17 1.389(6) . ?
 C17 C18 1.375(6) . ?
 N1 C1 1.155(6) . ?
 N1 C2 1.402(6) . ?
 C2 C3 1.402(6) . ?
 C2 C4 1.402(6) 3_767 ?
 C3 C4 1.400(6) . ?
 C3 C5 1.498(6) . ?
 C4 C6 1.513(5) . ?
 C5 H5A 0.9800 . ?
 C5 H5B 0.9800 . ?
 C5 H5C 0.9800 . ?
 C6 H6A 0.9800 . ?
 C6 H6B 0.9800 . ?
 C6 H6C 0.9800 . ?
 N2 C7 1.152(6) . ?
 N2 C8 1.407(6) . ?
 C8 C9 1.397(6) . ?
 C8 C10 1.400(6) . ?
 C9 C10 1.404(6) 3_564 ?
 C9 C11 1.499(6) . ?
 C10 C12 1.510(6) . ?
 C11 H11A 0.9800 . ?
 C11 H11B 0.9800 . ?
 C11 H11C 0.9800 . ?
 C12 H12B 0.9800 . ?
 C12 H12A 0.9800 . ?
 C12 H12C 0.9800 . ?

loop_
  _geom_angle_atom_site_label_1
  _geom_angle_atom_site_label_2
  _geom_angle_atom_site_label_3
  _geom_angle
  _geom_angle_site_symmetry_1
  _geom_angle_site_symmetry_3
  _geom_angle_publ_flag
 C14 C13 I1 120.9(3) . . ?
 C18 C13 I1 121.5(3) . . ?
 C18 C13 C14 117.6(4) . . ?
 F1 C14 C13 118.8(4) . . ?
 F1 C14 C15 119.0(4) . . ?
 C15 C14 C13 122.3(4) . . ?
 C14 C15 I2 120.9(3) . . ?
 C16 C15 I2 121.9(3) . . ?
 C16 C15 C14 117.1(4) . . ?
 F2 C16 C15 118.6(4) . . ?
 F2 C16 C17 118.1(4) . . ?
 C15 C16 C17 123.3(4) . . ?
 C16 C17 I3 121.0(3) . . ?
 C18 C17 I3 122.0(3) . . ?
 C18 C17 C16 116.9(4) . . ?
 F3 C18 C13 118.1(4) . . ?
 F3 C18 C17 119.1(4) . . ?
 C17 C18 C13 122.8(4) . . ?
 C1 N1 C2 178.0(5) . . ?
 N1 C2 C3 117.6(4) . . ?
 N1 C2 C4 118.2(4) . 3_767 ?
 C4 C2 C3 124.1(4) 3_767 . ?
 C2 C3 C5 121.8(4) . . ?
 C4 C3 C2 117.3(4) . . ?
 C4 C3 C5 120.9(4) . . ?
 C2 C4 C6 121.6(4) 3_767 . ?
 C3 C4 C2 118.5(4) . 3_767 ?
 C3 C4 C6 119.8(4) . . ?
 C3 C5 H5A 109.5 . . ?
 C3 C5 H5B 109.5 . . ?
 C3 C5 H5C 109.5 . . ?
 H5A C5 H5B 109.5 . . ?
 H5A C5 H5C 109.5 . . ?
 H5B C5 H5C 109.5 . . ?
 C4 C6 H6A 109.5 . . ?
 C4 C6 H6B 109.5 . . ?
 C4 C6 H6C 109.5 . . ?
 H6A C6 H6B 109.5 . . ?
 H6A C6 H6C 109.5 . . ?
 H6B C6 H6C 109.5 . . ?
 C7 N2 C8 177.3(5) . . ?
 C9 C8 N2 117.5(4) . . ?
 C9 C8 C10 125.1(4) . . ?
 C10 C8 N2 117.3(4) . . ?
 C8 C9 C10 117.5(4) . 3_564 ?
 C8 C9 C11 120.4(4) . . ?
 C10 C9 C11 122.1(4) 3_564 . ?
 C8 C10 C9 117.4(4) . 3_564 ?
 C8 C10 C12 122.5(4) . . ?
 C9 C10 C12 120.2(4) 3_564 . ?
 C9 C11 H11A 109.5 . . ?
 C9 C11 H11B 109.5 . . ?
 C9 C11 H11C 109.5 . . ?
 H11A C11 H11B 109.5 . . ?
 H11A C11 H11C 109.5 . . ?
 H11B C11 H11C 109.5 . . ?
 C10 C12 H12B 109.5 . . ?
 C10 C12 H12A 109.5 . . ?
 C10 C12 H12C 109.5 . . ?
 H12B C12 H12A 109.5 . . ?
 H12B C12 H12C 109.5 . . ?
 H12A C12 H12C 109.5 . . ?

loop_
  _geom_torsion_atom_site_label_1
  _geom_torsion_atom_site_label_2
  _geom_torsion_atom_site_label_3
  _geom_torsion_atom_site_label_4
  _geom_torsion
  _geom_torsion_site_symmetry_1
  _geom_torsion_site_symmetry_2
  _geom_torsion_site_symmetry_3
  _geom_torsion_site_symmetry_4
  _geom_torsion_publ_flag
 I1 C13 C14 F1 0.5(5) . . . . ?
 I1 C13 C14 C15 -180.0(3) . . . . ?
 I1 C13 C18 F3 -0.8(5) . . . . ?
 I1 C13 C18 C17 178.9(3) . . . . ?
 I2 C15 C16 F2 2.1(5) . . . . ?
 I2 C15 C16 C17 -176.8(3) . . . . ?
 I3 C17 C18 F3 3.4(5) . . . . ?
 I3 C17 C18 C13 -176.3(3) . . . . ?
 F1 C14 C15 I2 -2.9(5) . . . . ?
 F1 C14 C15 C16 -179.2(3) . . . . ?
 F2 C16 C17 I3 -2.2(5) . . . . ?
 F2 C16 C17 C18 -179.3(3) . . . . ?
 C13 C14 C15 I2 177.5(3) . . . . ?
 C13 C14 C15 C16 1.3(6) . . . . ?
 C14 C13 C18 F3 -179.8(3) . . . . ?
 C14 C13 C18 C17 -0.1(6) . . . . ?
 C14 C15 C16 F2 178.3(3) . . . . ?
 C14 C15 C16 C17 -0.6(6) . . . . ?
 C15 C16 C17 I3 176.7(3) . . . . ?
 C15 C16 C17 C18 -0.4(6) . . . . ?
 C16 C17 C18 F3 -179.6(3) . . . . ?
 C16 C17 C18 C13 0.7(6) . . . . ?
 C18 C13 C14 F1 179.5(3) . . . . ?
 C18 C13 C14 C15 -1.0(6) . . . . ?
 N1 C2 C3 C4 -179.9(4) . . . . ?
 N1 C2 C3 C5 -0.7(6) . . . . ?
 C2 C3 C4 C2 0.5(7) . . . 3_767 ?
 C2 C3 C4 C6 -180.0(4) . . . . ?
 C4 C2 C3 C4 -0.6(7) 3_767 . . . ?
 C4 C2 C3 C5 178.6(4) 3_767 . . . ?
 C5 C3 C4 C2 -178.7(4) . . . 3_767 ?
 C5 C3 C4 C6 0.8(6) . . . . ?
 N2 C8 C9 C10 176.8(4) . . . 3_564 ?
 N2 C8 C9 C11 -1.2(6) . . . . ?
 N2 C8 C10 C9 -176.8(4) . . . 3_564 ?
 N2 C8 C10 C12 3.3(6) . . . . ?
 C9 C8 C10 C9 1.9(7) . . . 3_564 ?
 C9 C8 C10 C12 -178.0(4) . . . . ?
 C10 C8 C9 C10 -1.9(7) . . . 3_564 ?
 C10 C8 C9 C11 -179.9(4) . . . . ?

_shelx_res_file
;
TITL 1ver0-22059_a#118_a.res in P2(1)/c
    1ver0-22059_a#118.res
    created by SHELXL-2019/2 at 13:12:16 on 20-Sep-2022
REM Old TITL 1ver0-22059_A#118 in P21/c #14
REM SHELXT solution in P2(1)/c: R1 0.074, Rweak 0.003, Alpha 0.021
REM <I/s> 0.838 for 149 systematic absences, Orientation as input
REM Formula found by SHELXT: C18 N2 F3 I3
CELL 1.54184 13.2428 17.1531 9.4351 90 107.514 90
ZERR 4 0.0002 0.0003 0.0002 0 0.002 0
LATT 1
SYMM -X,0.5+Y,0.5-Z
SFAC C H F I N
UNIT 72 48 12 12 8

L.S. 10 0 0
PLAN  7
TEMP -173
CONF
list 4
fmap 2 53
MORE -1
BOND $H
ACTA
REM <olex2.extras>
REM <HklSrc "%.\\1ver0-22059_A#118.hkl">
REM </olex2.extras>

WGHT    0.067400
FVAR       0.19193
I1    4    0.508630    0.453550    0.225525    11.00000    0.01576    0.00637 =
         0.01903   -0.00104    0.00706    0.00245
I2    4    0.246440    0.745608    0.048270    11.00000    0.00967    0.01186 =
         0.01357    0.00434    0.00477    0.00461
I3    4    0.626778    0.745463    0.598704    11.00000    0.01045    0.01341 =
         0.01245   -0.00462    0.00403   -0.00518
F1    3    0.331134    0.572342    0.053834    11.00000    0.01224    0.01283 =
         0.01291   -0.00309   -0.00104    0.00047
F2    3    0.420056    0.797345    0.348400    11.00000    0.01619    0.00501 =
         0.01987   -0.00189    0.00775   -0.00043
F3    3    0.624060    0.570268    0.483306    11.00000    0.01096    0.01554 =
         0.01440    0.00157   -0.00026    0.00363
C13   1    0.477914    0.568855    0.268357    11.00000    0.00946    0.00441 =
         0.00951   -0.00013    0.00463   -0.00072
C14   1    0.393416    0.609132    0.173473    11.00000    0.00923    0.00993 =
         0.01005    0.00066    0.00296    0.00083
C15   1    0.371017    0.685838    0.198949    11.00000    0.00648    0.01031 =
         0.01358    0.00394    0.00394    0.00099
C16   1    0.438029    0.721973    0.322540    11.00000    0.01047    0.00226 =
         0.01542    0.00137    0.00981    0.00094
C17   1    0.524429    0.685077    0.420664    11.00000    0.00976    0.01381 =
         0.00987   -0.00438    0.00377   -0.00559
C18   1    0.541704    0.608608    0.390854    11.00000    0.00868    0.00899 =
         0.01040    0.00077    0.00259    0.00080
N1    5    1.057050    0.614850    1.213888    11.00000    0.01326    0.01600 =
         0.01334   -0.00010    0.00445   -0.00389
C1    1    1.081906    0.661183    1.306725    11.00000    0.02679    0.01887 =
         0.01604   -0.00205    0.00926   -0.00817
C2    1    1.028213    0.556606    1.104934    11.00000    0.01284    0.01327 =
         0.00900   -0.00199    0.00480   -0.00489
C3    1    0.935183    0.567850    0.987145    11.00000    0.00784    0.01472 =
         0.01245    0.00454    0.00462    0.00177
C4    1    0.906791    0.509365    0.878933    11.00000    0.00677    0.01468 =
         0.01215    0.00394    0.00416   -0.00071
C5    1    0.867476    0.638811    0.977391    11.00000    0.02409    0.01560 =
         0.02389    0.00057    0.00491    0.00736
AFIX 137
H5A   2    0.893150    0.669004    1.069442    11.00000   -1.50000
H5B   2    0.794020    0.622902    0.963237    11.00000   -1.50000
H5C   2    0.870968    0.670946    0.893114    11.00000   -1.50000
AFIX   0
C6    1    0.807315    0.518084    0.749035    11.00000    0.01176    0.02954 =
         0.01380    0.00229    0.00051   -0.00121
AFIX 137
H6A   2    0.820239    0.555079    0.677256    11.00000   -1.50000
H6B   2    0.749718    0.537486    0.784714    11.00000   -1.50000
H6C   2    0.787541    0.467337    0.700980    11.00000   -1.50000
AFIX   0

N2    5    0.158579    0.393583   -0.381349    11.00000    0.01052    0.01402 =
         0.01791    0.00575    0.00368    0.00291
C7    1    0.221104    0.346507   -0.331013    11.00000    0.02087    0.02292 =
         0.02124    0.00601    0.00435    0.00151
C8    1    0.078492    0.448453   -0.443610    11.00000    0.00714    0.01104 =
         0.01365    0.00574    0.00642    0.00065
C9    1   -0.001008    0.426894   -0.572374    11.00000    0.00955    0.01266 =
         0.00853    0.00167    0.00334   -0.00286
C10   1    0.083770    0.519903   -0.369915    11.00000    0.00661    0.01371 =
         0.01211    0.00134    0.00535   -0.00443
C11   1    0.001482    0.348530   -0.641643    11.00000    0.01532    0.01225 =
         0.02080   -0.00096    0.00592   -0.00194
AFIX 137
H11A  2    0.074545    0.329348   -0.613737    11.00000   -1.50000
H11B  2   -0.025965    0.353095   -0.750034    11.00000   -1.50000
H11C  2   -0.042505    0.311926   -0.606431    11.00000   -1.50000
AFIX   0
C12   1    0.173960    0.540577   -0.233741    11.00000    0.01252    0.01678 =
         0.01373   -0.00060   -0.00173   -0.00385
AFIX 137
H12B  2    0.225013    0.497569   -0.209835    11.00000   -1.50000
H12A  2    0.146342    0.549681   -0.149762    11.00000   -1.50000
H12C  2    0.209068    0.587901   -0.253236    11.00000   -1.50000
AFIX   0
HKLF 4


REM  1ver0-22059_a#118_a.res in P2(1)/c
REM wR2 = 0.0965, GooF = S = 1.052, Restrained GooF = 1.052 for all data
REM R1 = 0.0369 for 3614 Fo > 4sig(Fo) and 0.0383 for all 3818 data
REM 239 parameters refined using 0 restraints

END

WGHT      0.0673      0.0000

REM Highest difference peak  1.034,  deepest hole -2.019,  1-sigma level  0.250
Q1    1   0.5016  0.5343  0.1222  11.00000  0.05    1.03
Q2    1   0.1693  0.7422  0.0973  11.00000  0.05    0.99
Q3    1   0.2867  0.8018 -0.0887  11.00000  0.05    0.91
Q4    1   0.4746  0.3950  0.3675  11.00000  0.05    0.90
Q5    1   0.3130  0.7982  0.0294  11.00000  0.05    0.90
Q6    1   0.5538  0.7592  0.6630  11.00000  0.05    0.89
Q7    1   0.4168  0.4434  0.2655  11.00000  0.05    0.89
;
_shelx_res_checksum                61756
_shelx_hkl_file
;
   0   0  -1    0.75    0.95
   0   0  -1    1.24    0.34
   0   0  -1    0.18    0.86
   0   0   1    0.97    0.22
   0   0  -1    1.87    0.60
   0   0  -2   15.27    1.25
   0   0  -2   12.78    3.05
   0   0  -2    7.02    1.46
   0   0  -2   13.80    3.09
   0   0   2    7.71    1.62
   0   0  -3    1.05    2.33
   0   0  -3    1.04    2.05
   0   0  -3    0.24    0.70
   0   0  -3   -0.39    0.73
   0   0  -4   52.92    8.53
   0   0  -4   53.10    8.10
   0   0  -4   70.72    6.57
   0   0  -4   66.47    5.80
   0   0  -5    3.38    3.28
   0   0  -5    0.99    1.45
   0   0  -5    3.51    2.76
   0   0  -6 1476.40   68.80
   0   0  -7    0.31    1.22
   0   0  -7    0.88    1.30
   0   0  -8    3.28    1.80
   0   0  -8    5.97    3.36
   0   0  -8   11.27    2.41
   0   0  -9    0.64    2.54
   0   0 -10    3.05    2.26
   0   1   0    0.04    0.24
   0   1   0    0.54    0.26
   0  -1   0    0.15    0.18
   0  -1  -1    4.01    1.13
   0   1  -1    3.83    1.10
   0  -1   1    7.86    0.80
   0   1  -1    6.26    0.90
   0  -1   1    4.18    0.73
   0  -1  -1    2.29    1.21
   0   1  -1    5.65    1.09
   0  -1  -2 1532.43   65.24
   0  -1  -2 1611.44   68.88
   0   1  -2 1508.36   68.32
   0   1  -2 1636.04   65.75
   0  -1   2 1560.64   66.44
   0  -1  -2 1495.06   69.98
   0   1  -2 1674.59   66.12
   0  -1  -2 1622.17   66.23
   0   1  -2 1501.79   68.08
   0   1  -3  111.38   10.39
   0  -1  -3  100.99    9.91
   0   1  -3  133.13    7.90
   0   1   3  129.89    9.06
   0   1  -3   92.71    9.62
   0  -1  -3  125.29    8.33
   0   1  -3  133.93    8.25
   0  -1  -3  124.83   11.27
   0  -1  -4 2267.54  103.63
   0   1  -4 2384.53  104.92
   0   1  -4 2441.54   96.54
   0  -1  -4 2304.54   95.99
   0  -1  -4 2300.35  103.33
   0  -1  -4 2563.11   98.29
   0   1  -4 2511.81   97.56
   0  -1  -5  537.99   34.82
   0  -1  -5  502.72   27.62
   0  -1  -5  478.29   31.94
   0   1  -5  487.03   26.72
   0   1  -6   31.13    5.85
   0  -1  -6   37.06    6.64
   0  -1  -6   25.71    7.32
   0   1  -7  330.02   17.31
   0  -1  -7  306.15   20.72
   0   1  -7  313.26   20.90
   0  -1  -7  310.94   16.87
   0   1  -7  314.52   17.38
   0  -1  -8   18.85    3.44
   0   1  -8   16.47    3.60
   0  -1  -8   19.84    3.10
   0   1  -8   18.26    5.25
   0  -1  -8   20.49    4.70
   0  -1  -9  173.80   10.54
   0   1  -9  164.54   15.08
   0  -1  -9  143.49   12.66
   0  -1 -10    9.88    2.82
   0   1 -10   14.63    3.87
   0   2   0  301.99   14.82
   0  -2   0  366.06   15.64
   0   2   0  324.77   14.56
   0  -2   0  399.69   14.66
   0  -2  -1   15.03    1.98
   0  -2  -1   12.57    1.41
   0  -2  -1   11.74    2.28
   0   2  -1   16.73    1.88
   0   2  -1   14.05    1.35
   0  -2  -2 3278.68  139.79
   0  -2   2 3625.59  136.61
   0  -2  -2 3379.87  137.79
   0   2  -2 3610.94  137.47
   0   2  -2 3460.62  139.27
   0  -2  -2 3345.71  142.42
   0  -2  -3  307.29   19.04
   0   2   3  325.87   17.54
   0   2  -3  272.36   18.23
   0  -2  -3  362.35   22.04
   0  -2  -3  338.77   16.87
   0   2  -3  311.78   15.95
   0  -2  -4 1404.55   71.25
   0   2   4 1500.37   68.97
   0  -2  -4 1663.75   67.80
   0   2  -4 1575.37   66.36
   0  -2  -4 1672.67   74.36
   0  -2  -5   37.02    7.81
   0  -2  -5   29.61    5.38
   0  -2  -5   31.51    7.11
   0   2  -5   34.05    5.20
   0  -2  -6   57.71    8.59
   0  -2  -6   39.87    9.04
   0   2  -6   44.96    6.89
   0   2  -7  101.83    7.98
   0  -2  -7  104.10   10.51
   0   2  -7   73.22    9.50
   0   2  -7   84.29    7.67
   0  -2  -7  101.80    7.55
   0  -2  -8  427.98   25.33
   0   2  -8  341.64   25.17
   0  -2  -8  400.43   22.65
   0  -2  -8  387.39   20.03
   0   2  -8  353.63   20.99
   0   2  -9   25.85    6.28
   0  -2  -9   28.25    4.88
   0  -2  -9   30.07    3.94
   0  -2  -9   27.39    5.38
   0  -2 -10    5.40    1.71
   0  -2 -10    2.65    1.77
   0   2 -10    5.52    3.11
   0   3   0    1.47    0.99
   0  -3   0    0.38    1.02
   0  -3  -1   41.48    2.84
   0   3  -1   42.84    2.64
   0   3   1   49.54    5.83
   0  -3   1   42.47    3.27
   0  -3  -1   41.20    6.31
   0  -3  -1   33.48    3.26
   0  -3  -2 2550.58  109.73
   0  -3   2 2848.71  107.48
   0  -3  -2 2525.23  112.50
   0   3  -2 2828.08  107.36
   0   3  -2 2729.72  109.03
   0  -3  -2 2603.77  107.97
   0  -3  -3  303.30   18.88
   0   3   3  351.49   18.37
   0   3  -3  312.45   16.07
   0  -3  -3  324.00   17.21
   0  -3  -3  362.61   22.82
   0  -3  -4 1185.56   58.84
   0   3   4 1285.77   57.46
   0  -3  -4 1225.94   55.61
   0   3  -4 1204.82   53.80
   0  -3  -5    9.28    4.29
   0   3  -5   11.74    3.05
   0  -3  -5    8.08    4.34
   0  -3  -5    4.81    2.59
   0  -3  -6  645.63   42.87
   0  -3  -7  132.29    8.89
   0   3  -7  110.36    9.49
   0  -3  -7  132.01   10.81
   0  -3  -7  149.52   12.15
   0   3  -7  135.24    9.91
   0   3  -8  330.26   20.28
   0  -3  -8  324.47   18.07
   0  -3  -8  399.79   23.01
   0  -3  -8  362.99   20.35
   0  -3  -8  427.64   22.90
   0   3  -8  263.52   22.07
   0  -3  -9  193.64   13.73
   0  -3  -9  156.38   11.74
   0  -3  -9  160.50   10.54
   0  -3 -10  248.05   14.02
   0  -3 -10  241.79   13.37
   0   4   0 3124.50  132.45
   0   4   0 3336.26  131.50
   0   4   1  766.45   38.48
   0  -4  -1  870.75   35.60
   0   4   1  816.82   37.54
   0  -4   1  884.28   35.73
   0  -4  -1  795.37   40.54
   0  -4  -2  446.40   22.42
   0   4   2  403.13   21.61
   0  -4   2  450.16   20.93
   0  -4  -3 1394.79   61.23
   0   4  -3 1324.24   57.12
   0   4   3 1338.20   59.93
   0  -4  -4   17.09    4.53
   0  -4  -4   26.13    6.48
   0   4  -4   18.78    3.29
   0   4   4   26.67    4.88
   0  -4  -5  348.33   25.07
   0   4   5  347.99   24.51
   0  -4  -6  962.79   43.95
   0   4  -6 1000.20   44.98
   0  -4  -6 1222.30   60.61
   0  -4  -6 1037.22   46.11
   0   4   6 1253.89   59.12
   0   4  -7   23.08    4.19
   0  -4  -7   20.45    4.16
   0  -4  -7   25.84    4.40
   0  -4  -8   21.81    4.61
   0  -4  -8   34.90    5.46
   0  -4  -8   21.24    3.99
   0  -4  -9    1.69    2.14
   0  -4  -9    2.94    1.96
   0  -4  -9    2.52    2.18
   0  -4  -9    1.74    1.55
   0  -4 -10    5.21    1.79
   0  -4 -10    7.75    2.17
   0  -4 -10    4.42    1.82
   0   5   0    0.14    0.52
   0  -5   0    0.33    1.92
   0   5   0    1.16    1.24
   0  -5  -1    7.14    2.86
   0   5   1   11.97    3.10
   0  -5   1    8.03    2.11
   0   5   1   10.97    3.00
   0  -5  -2 1819.17   76.91
   0  -5  -2 2124.59   83.94
   0  -5   2 1613.35   75.23
   0   5   2 1837.79   76.54
   0   5   2 1947.31   80.02
   0   5   2 2270.95   82.43
   0  -5  -3    0.92    1.64
   0   5   3    0.42    0.99
   0  -5  -4 4148.13  174.96
   0   5   4 4357.95  175.07
   0  -5  -5    9.38    3.67
   0   5   5    9.65    3.71
   0   5   5    4.13    2.96
   0  -5  -6  120.70   15.19
   0  -5  -6  116.31    8.98
   0   5   6  120.58   14.48
   0   5  -6  116.58    9.12
   0  -5  -7    3.30    1.96
   0  -5  -7    2.68    2.04
   0  -5  -8   69.10    7.46
   0  -5  -8   62.50    7.01
   0  -5  -8   73.80    6.96
   0  -5  -9    4.01    2.04
   0  -5  -9    0.99    1.41
   0  -5  -9    4.44    2.07
   0  -5  -9    1.18    1.53
   0  -5 -10  229.07   12.65
   0  -5 -10  239.21   12.99
   0   6   0 3529.87  153.03
   0  -6   0 4161.34  154.90
   0   6   1 1571.65   73.00
   0  -6  -1 1559.89   74.36
   0  -6   1 1534.20   70.40
   0   6   2 2143.35   84.37
   0   6   2 2007.41   80.35
   0  -6   2 1611.27   78.85
   0  -6  -2 1858.55   84.75
   0   6   2 2366.50   85.44
   0  -6  -3  797.66   43.17
   0   6   3 1152.12   48.31
   0   6   3  872.04   43.55
   0   6   3 1096.09   48.32
   0   6   4    2.16    1.92
   0   6   4    1.90    1.85
   0  -6  -4    6.38    2.94
   0   6   5   20.93    5.45
   0   6   5   29.40    6.58
   0  -6  -5   27.74    6.40
   0  -6  -6  764.34   36.72
   0   6   6  856.98   48.81
   0  -6  -6  830.42   47.79
   0   6   7  392.00   20.25
   0  -6  -7  348.36   19.78
   0  -6  -7  349.60   19.70
   0  -6  -8   63.64    6.71
   0  -6  -8   71.95    7.13
   0  -6  -9    4.14    1.97
   0  -6  -9    2.65    1.81
   0  -6 -10    0.20    1.06
   0  -6 -10    0.71    1.23
   0   7   0    0.48    1.60
   0  -7   0    2.92    2.09
   0   7   1    5.95    2.82
   0  -7   1    6.50    2.29
   0  -7  -1   10.06    3.67
   0   7   2 3111.28  114.99
   0   7   2 2760.40  110.32
   0  -7  -2 2826.45  115.33
   0   7   3   73.96    8.67
   0   7   3   62.42    7.28
   0   7   3   85.97    9.95
   0   7   4  684.36   36.68
   0   7   4  554.60   33.27
   0   7   5  103.52   12.88
   0   7   5  125.75   13.89
   0  -7  -6  934.50   49.85
   0  -7  -6  798.35   38.14
   0  -7  -6  843.57   38.11
   0   7   6  983.44   51.90
   0   7   7   25.46    4.11
   0  -7  -7   31.99    4.52
   0  -7  -7   32.49    4.41
   0  -7  -8  348.49   18.87
   0  -7  -8  339.25   18.88
   0  -7  -9    5.64    2.04
   0  -7  -9    1.80    1.60
   0  -7 -10   71.20    5.19
   0  -7 -10   68.13    5.61
   0  -8   0  413.95   24.71
   0  -8  -1  643.78   36.19
   0   8   1  717.13   36.70
   0   8   2 1656.14   68.42
   0  -8  -2 1750.74   73.39
   0   8   2 1848.96   72.82
   0   8   3  359.63   21.55
   0   8   3  419.83   24.05
   0   8   4 1334.63   57.17
   0   8   4  877.18   50.62
   0   8   5  347.06   26.12
   0   8   5  338.96   18.10
   0  -8  -6  149.81   10.09
   0  -8  -6  132.55    9.42
   0  -8  -6  145.47    9.75
   0   8   7    1.72    1.53
   0  -8  -7    1.33    1.58
   0  -8  -7    1.62    1.59
   0   8   8   84.41    7.13
   0  -8  -8   87.91    7.30
   0  -8  -8   79.14    7.09
   0  -8  -9   90.15    6.85
   0  -8  -9   89.96    7.05
   0  -8 -10    2.81    1.07
   0  -8 -10    2.34    1.32
   0  -9   0    0.64    1.86
   0  -9  -1    1.39    2.19
   0  -9   1   -0.53    1.27
   0   9   1    0.72    1.71
   0  -9  -2 1422.93   63.39
   0   9   2 1577.76   63.93
   0   9   3  201.26   15.27
   0   9   3  238.08   17.51
   0   9   4 1624.96   75.73
   0   9   5    1.89    2.75
   0   9   5    1.44    1.37
   0   9   6   29.20    4.13
   0  -9  -6   33.53    4.24
   0  -9  -6   22.86    3.60
   0  -9  -7  142.05    9.75
   0  -9  -7  140.39    9.64
   0  -9  -7  121.58    9.31
   0   9   7  155.61   10.29
   0  -9  -8   16.08    2.95
   0  -9  -8   10.20    2.48
   0   9   8   15.55    2.92
   0  -9  -9  423.29   20.77
   0  -9  -9  446.90   21.25
   0   9   9  467.64   20.92
   0 -10   0 4715.27  193.65
   0 -10  -1  136.41   14.04
   0 -10   1  148.21   13.60
   0 -10   2   58.53    8.14
   0 -10  -2   64.13    9.28
   0 -10   3    9.91    3.68
   0  10   3    4.68    2.64
   0  10   4  232.65   18.86
   0  10   4  241.10   13.19
   0  10   4  223.57   12.82
   0  10   5    5.34    1.91
   0  10   6 1076.68   46.85
   0 -10  -6 1050.47   46.16
   0  10   7  147.54    9.95
   0 -10  -7  141.30    9.59
   0 -10  -7  133.11    9.38
   0 -10  -8   23.02    3.27
   0  10   8   21.95    3.38
   0 -10  -8   20.23    3.21
   0 -10  -9    1.11    1.06
   0  10   9    2.02    1.20
   0 -11   0    2.29    2.23
   0 -11  -1   32.55    6.67
   0 -11   1   23.83    5.66
   0 -11   2 1203.17   69.12
   0 -11  -2 1575.92   72.89
   0  11  -3    2.18    1.56
   0 -11   3    2.55    2.27
   0  11   3    2.44    1.24
   0  11   3    6.81    3.36
   0  11   4 1459.10   60.28
   0  11   4 1390.68   60.08
   0  11  -4 1456.64   60.53
   0  11   5  349.75   18.37
   0 -11  -6    2.56    1.66
   0  11   6    3.50    1.61
   0  11   7  253.68   14.74
   0 -11  -7  270.53   14.69
   0  11   7  280.95   15.20
   0 -11  -8   26.69    3.39
   0  11   8   30.95    3.73
   0 -11  -9   96.70    6.29
   0  11   9   78.23    5.50
   0  12   0  474.18   22.91
   0 -12   0  400.92   29.17
   0  12  -1   82.76    6.99
   0 -12   1   70.98   10.54
   0  12   1   80.43    6.35
   0  12   2 2228.73   86.99
   0  12  -2 2171.51   88.16
   0  12   3   23.47    3.27
   0  12   3   22.11    3.18
   0  12  -3   25.95    3.92
   0  12   4  519.08   24.27
   0  12   4  501.00   24.33
   0  12  -4  495.02   24.90
   0  12   5   14.48    2.89
   0  12   5   12.58    2.73
   0  12   6   85.68    6.80
   0  12   6   74.86    6.75
   0 -12  -6   96.56    7.16
   0  12   7  207.35   12.33
   0 -12  -7  230.13   12.48
   0  12   7  215.55   12.55
   0  12   8  163.98    9.56
   0  13   0    0.66    1.61
   0  13   0    0.27    1.38
   0 -13   0   -1.00    2.66
   0  13   1    3.21    1.47
   0  13  -1    5.11    2.30
   0  13  -2 1054.64   48.18
   0  13   2 1126.86   46.98
   0  13   3  547.89   25.81
   0  13  -3  539.27   27.18
   0  13   3  562.55   26.01
   0  13   4  316.70   16.85
   0  13  -4  287.39   17.62
   0  13   5  121.57    8.53
   0  13   5  126.78    8.89
   0 -13  -6  380.19   18.67
   0  13   6  360.76   18.65
   0  13   6  361.15   18.25
   0 -13  -7  119.83    7.94
   0  13   7  120.23    8.00
   0  13   7  119.02    7.86
   0 -13  -8   77.03    5.25
   0  13   8   66.12    5.00
   0  14   0 1762.92   81.99
   0  14   0 2365.52   84.29
   0  14   1  174.56   10.77
   0  14  -1  196.18   12.17
   0  14  -2   12.43    2.77
   0  14  -2   12.51    3.10
   0  14   2   13.96    2.65
   0  14  -3  331.55   19.38
   0  14   3  374.29   18.41
   0  14  -4    2.27    1.97
   0  14   4    4.03    1.64
   0  14   4    2.44    1.45
   0 -14  -5  267.61   14.46
   0  14   5  260.97   14.58
   0  14   6  731.57   31.98
   0 -14  -6  767.62   32.03
   0  14   6  653.84   31.04
   0 -14  -7  106.48    7.02
   0  14   7  107.07    6.95
   0  14   7   99.58    6.68
   0  14   8   30.66    2.82
   0  15   0   -0.60    1.55
   0  15   0   -0.32    1.40
   0  15  -1    3.09    1.77
   0  15   1    6.26    1.99
   0  15  -1    9.38    2.49
   0  15  -2  418.41   21.57
   0  15  -2  460.45   23.13
   0  15   2  428.65   21.14
   0  15  -3   78.81    7.61
   0  15   3   88.60    6.83
   0  15   4  811.80   35.45
   0  15   4  815.14   35.65
   0  15  -4  763.91   36.73
   0 -15  -5  233.43   12.77
   0  15   5  229.33   12.90
   0 -15  -6   13.55    2.40
   0  15   6   12.93    2.26
   0 -15  -7   88.75    5.54
   0  15   7   77.52    5.24
   0  16   0 1414.60   60.10
   0  16   0 1429.86   60.11
   0  16   1  258.10   14.13
   0  16  -1  241.50   14.24
   0  16  -1  253.64   14.72
   0  16  -2  619.18   29.53
   0  16   2  645.15   29.07
   0  16  -2  654.60   30.60
   0  16   3  375.46   19.20
   0  16  -3  418.59   21.03
   0  16  -4    9.01    2.42
   0 -16  -5   71.63    5.68
   0  16   5   73.80    5.69
   0  16  -5   80.22    6.29
   0  16   6  333.38   16.24
   0 -16  -6  359.72   16.51
   0  17   0    9.04    2.35
   0  17   0    1.28    1.33
   0  17   1    3.77    1.68
   0  17  -1    8.64    2.16
   0  17  -1    4.19    1.70
   0  17  -2 1011.28   44.40
   0  17  -2 1054.91   45.11
   0  17  -3   15.40    3.00
   0 -17  -4  148.19    8.85
   0  17  -4  161.74    9.78
   0  17   5  147.50    8.10
   0 -17  -5  137.88    7.99
   0  17  -5  125.29    7.96
   0 -17  -6  364.59   15.99
   0  17   6  338.65   15.76
   0  18   0  273.16   14.36
   0  18  -1  219.66   12.23
   0  18   1  219.17   11.91
   0  18  -1  220.54   12.12
   0  18  -2  667.50   30.63
   0  18  -2  730.46   31.19
   0  18  -3  260.43   13.65
   0 -18  -4  105.66    6.46
   0  18  -4  103.86    6.78
   0 -18  -5  373.53   16.72
   0  19   0   -0.57    1.26
   0  19   1    2.95    1.21
   0  19  -1    1.15    1.16
   0  19  -1    0.18    0.93
   0  19  -2  197.03   10.41
   0  19  -2  195.99   10.42
   0 -19  -3  164.42    8.56
   0  19  -3  164.54    8.93
   0 -19  -4  548.69   23.14
   0  19  -4  541.81   23.31
   0  20   0 1517.81   61.00
   0  20  -1  129.56    7.23
   0  20  -1  141.39    7.55
   0  20  -2    2.62    1.04
   0  20  -2    5.06    1.25
   1   0 -11    1.38    1.26
   1   0 -10   41.19    4.42
   1   0 -10   46.63    6.36
   1   0  -9    0.55    1.27
   1   0  -9    0.38    1.55
   1   0  -9   -1.39    2.35
   1   0  -8  556.71   25.21
   1   0  -8  544.17   26.29
   1   0  -8  524.17   31.33
   1   0  -8  486.87   26.17
   1   0  -7   -0.30    1.22
   1   0  -7    0.31    1.26
   1   0  -7    1.12    1.06
   1   0  -6 3201.99  151.81
   1   0  -5   -0.38    1.00
   1   0  -5    1.21    2.87
   1   0  -4  209.18   12.21
   1   0  -4  188.00   14.93
   1   0  -4  207.91   12.82
   1   0  -4  187.91   17.18
   1   0  -3    0.71    1.06
   1   0  -3    0.20    0.78
   1   0  -3   -0.41    1.84
   1   0  -3    0.23    0.87
   1   0  -3    1.10    2.53
   1   0  -2 1681.10   66.36
   1   0  -2 1659.65   66.92
   1   0  -2 1676.70   66.94
   1   0  -2 1704.98   66.69
   1   0  -2 1545.65   68.22
   1   0  -2 1654.56   69.29
   1   0  -1    0.74    0.38
  -1   0   1   -0.08    0.37
   1   0  -1    0.36    0.58
   1   0  -1    0.71    0.63
   1   0  -1   -0.14    0.79
   1   0  -1    0.70    0.78
  -1   0   0 3084.61  118.88
  -1   0   0 3022.03  118.24
   1   0   1    0.57    1.14
   1   0   1    1.71    0.53
  -1   0  -1    1.01    1.04
  -1   0  -1    1.15    0.56
   1   0   2  280.51   17.20
  -1   0  -2  297.45   17.45
  -1   0  -3    1.68    1.77
  -1   0  -4  976.08   50.50
  -1   0  -4  977.40   44.65
  -1   0  -5    1.03    2.12
  -1   0  -5    1.61    1.80
  -1   0  -6   92.77    8.25
  -1   0  -6  101.59   11.27
  -1   0  -6  111.01    7.61
  -1   0  -7    0.49    1.66
  -1   0  -7    1.25    1.12
  -1   0  -8 1039.57   50.18
  -1   0  -9    5.15    3.05
  -1   0 -10  165.95   11.81
   1  -1 -11  143.45    8.76
   1   1 -11  139.72    8.94
   1  -1 -10  968.47   43.81
   1   1 -10 1014.72   45.68
   1  -1 -10  899.87   40.69
   1   1  -9   51.58    6.12
   1  -1  -9   60.01    6.13
   1  -1  -9   56.31    7.79
   1   1  -9   59.07    9.28
   1   1  -9   55.02    5.37
   1  -1  -9   52.40    5.26
   1  -1  -8  840.02   37.98
   1   1  -8  785.36   38.43
   1   1  -8  766.25   44.26
   1   1  -8  826.73   38.14
   1   1  -8  861.87   36.77
   1  -1  -8  822.50   36.44
   1  -1  -7  434.62   21.16
   1   1  -7  389.25   21.28
   1   1  -7  444.79   20.22
   1   1  -7  440.32   21.58
   1  -1  -7  362.09   22.46
   1  -1  -6    9.99    2.91
   1  -1  -6    8.63    6.17
   1  -1  -5  101.66    8.65
   1   1  -5  103.01    8.84
   1  -1  -5  119.15   12.89
   1  -1  -5  116.49   15.35
   1   1  -5  106.64   13.93
   1  -1  -4 1935.50   78.82
   1   1  -4 1951.75   79.15
   1  -1  -4 1910.46   85.17
   1   1  -4 1991.52   79.83
   1  -1  -4 1829.09   79.88
   1  -1  -4 1986.55   88.55
   1   1  -4 1706.87   85.97
   1  -1  -3  461.95   20.70
   1   1  -3  439.47   20.02
   1   1  -3  417.95   20.56
   1   1  -3  387.68   21.79
   1  -1  -3  447.51   20.78
   1  -1  -3  421.55   23.87
   1   1  -3  406.99   20.16
   1   1  -3  385.47   23.91
   1  -1  -3  440.00   24.77
   1   1  -2  362.26   17.05
   1   1  -2  383.34   16.66
   1  -1  -2  381.38   16.94
   1  -1  -2  366.37   17.06
   1   1  -2  363.90   17.08
   1   1  -2  379.18   16.96
   1   1  -2  331.50   17.57
   1  -1  -2  380.70   16.24
   1  -1  -2  345.99   18.62
   1  -1  -2  381.76   18.99
   1   1  -2  368.36   19.20
   1  -1  -1    1.45    1.09
   1   1  -1    2.66    0.59
   1  -1  -1    2.26    0.38
  -1   1   1    1.82    0.52
   1   1  -1    3.22    0.93
  -1  -1   1    2.02    0.46
   1  -1  -1    3.18    0.81
   1  -1  -1    3.77    2.34
  -1   1   1    3.08    0.94
   1  -1  -1    2.21    1.08
   1   1  -1    2.28    0.92
  -1  -1   0  191.98    9.67
   1  -1   0  230.69    9.08
  -1   1   0  228.36   10.07
  -1  -1   0  191.19    9.21
  -1  -1  -1   17.41    1.99
  -1   1  -1   16.21    1.47
  -1  -1  -1   11.33    2.18
   1  -1   1   17.20    1.52
   1   1   1   11.45    2.24
  -1  -1  -1   17.99    2.19
  -1   1  -1   15.90    2.21
  -1   1  -1   16.44    2.01
  -1  -1  -1   11.97    2.38
  -1  -1  -2    7.01    1.39
  -1  -1  -2    5.14    2.42
  -1   1  -2    9.12    1.22
  -1   1  -2    4.58    1.21
   1  -1   2    3.21    1.64
   1   1   2    0.99    1.32
   1  -1   2    8.08    1.18
  -1  -1  -2   11.16    3.15
  -1   1  -2    3.69    1.84
  -1  -1  -3  354.27   21.27
  -1   1  -3  378.53   22.19
  -1  -1  -3  345.91   22.06
   1   1   3  343.01   20.81
  -1  -1  -4  103.58    8.86
  -1  -1  -4   85.68   10.78
  -1   1  -4   95.40    8.24
  -1   1  -4   85.97   11.01
  -1   1  -5  305.05   18.78
  -1  -1  -5  282.29   23.39
  -1  -1  -5  300.70   19.52
  -1   1  -6  383.97   18.16
  -1  -1  -6  324.31   19.96
  -1   1  -6  302.19   19.35
  -1   1  -6  347.11   17.91
  -1  -1  -6  375.94   24.72
  -1  -1  -6  410.23   31.07
  -1   1  -6  350.90   23.12
  -1  -1  -6  377.59   17.98
  -1  -1  -7  210.23   15.95
  -1  -1  -7  211.65   14.43
  -1   1  -7  196.26   15.25
  -1  -1  -7  217.59   12.87
  -1   1  -7  222.03   13.33
  -1  -1  -8  145.95   12.03
  -1   1  -8  130.53   12.94
  -1  -1  -8  146.46   13.46
  -1   1  -9   36.10    6.80
  -1  -1  -9   36.03    5.73
  -1  -1 -10  485.41   24.50
  -1   1 -10  503.77   26.43
   1  -2 -11   11.89    2.12
   1  -2 -10   73.85    6.17
   1  -2 -10   79.92    7.36
   1   2 -10   71.40    8.20
   1  -2  -9    0.84    1.20
   1   2  -9   -0.79    3.27
   1  -2  -9   -0.51    2.18
   1  -2  -9   -0.33    1.47
   1   2  -9    0.45    2.01
   1   2  -8  494.69   26.28
   1   2  -8  574.32   25.09
   1  -2  -8  556.83   30.60
   1   2  -8  441.71   31.04
   1  -2  -8  490.65   25.24
   1   2  -8  513.53   27.08
   1   2  -7   40.74    4.15
   1   2  -7   33.40    4.55
   1  -2  -7   28.72    4.52
   1  -2  -7   30.93    6.12
   1   2  -7   37.36    4.84
   1  -2  -7   31.53    4.00
  -1   2   6 1469.06   66.40
   1  -2  -6 1577.30   78.40
   1  -2  -5   28.54    4.29
   1  -2  -5   30.22    8.17
   1  -2  -4 2754.19  121.52
   1   2  -4 2731.28  114.08
   1  -2  -4 2832.83  115.41
   1  -2  -4 3042.37  123.02
   1  -2  -3  215.36   11.94
   1   2  -3  210.11   12.34
   1   2  -3  218.81   11.97
   1  -2  -3  207.88   15.61
   1  -2  -3  201.17   12.25
   1   2  -3  264.94   15.61
   1  -2  -3  230.82   15.51
   1   2  -2 1856.30   74.97
   1  -2  -2 2032.41   74.76
  -1   2   2 1827.94   75.97
   1   2  -2 1823.47   75.44
   1   2  -2 1758.62   75.20
   1   2  -2 2190.89   77.16
   1  -2  -2 1996.38   77.22
   1   2  -1   10.19    1.80
   1  -2  -1   11.29    2.47
  -1   2   1    8.09    1.26
   1  -2  -1    9.81    2.72
  -1   2   1    8.98    1.75
  -1  -2   1   11.27    1.14
   1   2  -1   13.12    1.63
   1  -2  -1   13.61    1.14
   1  -2  -1    9.45    1.25
   1   2  -1   13.89    1.39
   1  -2  -1   10.05    1.92
  -1   2   0  257.90   12.86
   1  -2   0  288.78   12.08
   1   2   0  289.17   13.55
   1  -2   0  298.23   12.94
  -1  -2   0  275.71   14.00
  -1  -2   0  241.26   12.42
  -1  -2  -1  717.12   35.94
   1   2   1  703.58   36.28
   1  -2   1  909.86   34.67
  -1  -2  -1  838.10   37.92
  -1   2  -1  928.97   35.48
  -1  -2  -1  956.55   36.23
  -1  -2  -2  441.32   22.28
  -1  -2  -2  423.89   23.48
   1   2   2  450.24   23.61
  -1  -2  -2  480.21   25.83
  -1   2  -2  488.65   23.65
  -1  -2  -3  667.23   34.73
   1   2   3  684.04   34.69
  -1   2  -3  707.18   35.76
  -1  -2  -3  791.79   38.36
  -1  -2  -4 1117.59   55.16
  -1  -2  -4 1189.35   52.30
  -1  -2  -4 1258.16   58.18
  -1   2  -4 1170.74   50.70
  -1   2  -4 1012.12   55.93
   1   2   4 1089.28   54.72
  -1   2  -5   26.84    4.87
  -1  -2  -5   44.81    8.63
  -1  -2  -5   33.65    5.95
  -1   2  -6  861.34   37.65
  -1  -2  -6  839.31   39.87
  -1  -2  -6  854.80   39.13
  -1   2  -6  681.41   39.33
  -1  -2  -6  951.54   37.66
  -1  -2  -6 1076.39   55.70
  -1   2  -6  850.79   37.71
  -1   2  -6  796.12   42.98
  -1  -2  -6  923.54   47.05
  -1  -2  -7   85.35    9.23
  -1   2  -7   56.83    8.05
  -1  -2  -7   78.63    7.64
  -1  -2  -7   79.60    6.60
  -1   2  -7   73.48    6.95
  -1  -2  -8  380.16   22.54
  -1   2  -8  378.17   25.93
  -1   2  -9   -0.74    3.30
  -1  -2  -9    3.79    2.29
  -1  -2  -9    2.09    2.77
  -1   2 -10  188.05   13.73
  -1  -2 -10  177.02   11.22
   1  -3 -10  131.56    9.56
   1  -3 -10  134.44    8.91
   1  -3  -9   76.29    6.54
   1  -3  -9   87.65    9.00
   1  -3  -9   79.49    8.13
   1  -3  -8 2076.79   83.62
   1   3  -8 1874.02   85.98
   1   3  -8 1903.05   85.34
   1   3  -7  168.93   11.72
   1  -3  -7  167.82   23.14
   1  -3  -7  151.50   11.07
   1  -3  -7  189.87   14.34
   1   3  -7  145.05   11.42
   1  -3  -7  176.04   10.48
   1  -3  -6  272.05   18.16
  -1   3   6  315.27   23.87
   1  -3  -6  315.84   28.05
  -1   3   5  124.66   12.48
   1  -3  -5  140.96   15.61
   1  -3  -4  674.31   37.09
   1  -3  -3    1.77    1.31
   1  -3  -3    2.77    1.98
   1  -3  -3    2.04    1.01
   1   3  -3    1.39    1.19
   1  -3  -2 2670.17  112.78
  -1   3   2 2491.82  112.69
  -1   3   2 2824.98  113.31
   1   3  -2 2671.52  110.98
   1  -3  -1   38.02    3.67
   1   3  -1   29.84    2.75
  -1   3   1   26.08    2.87
   1   3  -1   34.02    3.46
   1   3  -1   49.26    2.49
  -1  -3   1   35.78    2.98
   1  -3  -1   38.39    2.60
  -1   3   1   34.43    3.80
   1  -3  -1   43.95    2.79
   1   3  -1   40.79    2.98
   1  -3  -1   41.22    4.99
  -1  -3   0  225.17   10.42
   1   3   0  234.78   14.64
   1   3   0  213.12   12.08
   1  -3   0  267.16   11.06
  -1   3   0  206.18   11.38
   1   3   0  258.92   12.17
   1  -3   0  245.88   11.98
  -1  -3   0  215.92   13.15
  -1  -3  -1    4.46    1.57
  -1  -3  -1    7.34    2.15
  -1  -3  -1    4.97    1.40
  -1   3  -1    2.75    0.97
   1   3   1    1.38    1.20
   1  -3   1    2.51    0.83
  -1  -3  -2    4.08    1.80
  -1   3  -2    4.36    1.86
  -1  -3  -2    3.29    2.31
   1  -3   2    3.29    0.99
   1   3   2    4.92    1.79
  -1  -3  -3    6.88    2.52
  -1   3  -3    4.48    2.31
  -1  -3  -3   10.15    3.71
  -1  -3  -3    5.53    1.95
  -1   3  -3   10.06    2.12
   1   3   3    9.88    3.08
  -1  -3  -4  547.14   31.14
   1   3   4  510.54   30.74
  -1   3  -4  555.63   27.37
  -1  -3  -4  558.52   29.33
  -1  -3  -4  634.74   34.92
  -1   3  -5    6.65    2.34
  -1  -3  -5    7.04    4.48
  -1  -3  -5    3.91    2.46
  -1  -3  -6   82.70    7.60
  -1   3  -6   69.30    8.10
  -1  -3  -6   89.40    7.57
  -1   3  -6   79.20    6.86
  -1   3  -6   84.47    9.67
  -1  -3  -6  107.27   12.49
  -1  -3  -6  119.96   15.74
  -1  -3  -7  329.21   19.01
  -1   3  -7  213.88   17.80
  -1  -3  -7  299.03   17.64
  -1  -3  -7  278.94   16.34
  -1  -3  -7  284.61   15.18
  -1   3  -7  251.75   15.97
  -1  -3  -8  283.22   17.87
  -1   3  -8  223.05   18.78
  -1  -3  -8  237.54   15.73
  -1  -3  -8  294.26   18.52
  -1  -3  -9   84.33    6.96
  -1   3  -9   79.56   10.44
  -1  -3  -9   89.39    7.93
  -1  -3  -9  108.33    9.59
  -1  -3 -10 1177.44   48.83
  -1  -3 -10 1114.76   48.72
   1  -4 -10   73.63    6.25
   1  -4 -10   83.31    6.82
   1  -4 -10   76.75    6.57
   1  -4  -9    2.84    1.59
   1  -4  -9    6.07    2.53
   1  -4  -9    5.61    2.52
   1  -4  -9    3.57    1.95
   1   4  -8  421.58   24.15
   1  -4  -8  435.18   24.29
   1   4  -8  392.46   24.40
   1  -4  -7   41.92    5.05
   1  -4  -7   44.24    6.31
   1   4  -7   50.35    6.12
   1  -4  -6 2032.39   91.03
  -1   4   6 1930.58   85.49
   1  -4  -5  140.13   15.13
  -1   4   5  150.06   14.12
  -1   4   5  144.20   13.30
   1  -4  -4  462.84   27.66
  -1   4   4  430.82   26.22
  -1   4   4  459.93   24.72
   1  -4  -3  921.93   43.29
  -1   4   3  919.67   43.55
   1  -4  -2    5.50    2.08
  -1   4   2    6.41    2.13
  -1   4   2    5.05    2.11
   1  -4  -2    8.37    3.84
   1  -4  -1  413.72   19.19
   1   4  -1  322.62   17.97
  -1   4   1  373.46   18.81
   1  -4  -1  475.83   18.07
  -1   4   1  400.34   20.43
   1  -4  -1  431.45   21.94
  -1  -4   1  396.71   18.65
   1   4  -1  427.93   19.30
   1  -4   0 1734.98   62.22
   1  -4   0 1512.46   63.32
   1   4   0 1531.33   62.70
  -1  -4   0 1437.08   64.85
   1   4   0 1643.09   62.98
  -1   4   0 1442.09   62.47
   1   4   0 1612.37   62.41
  -1  -4  -1  741.09   34.72
   1  -4   1  833.05   34.60
   1  -4   1  872.74   35.50
   1   4   1  754.33   35.56
  -1  -4  -1  832.37   37.13
  -1  -4  -2  349.08   20.31
   1   4   2  410.74   21.46
   1  -4   2  437.07   19.22
  -1  -4  -2  427.76   23.37
  -1   4  -2  423.13   21.42
  -1  -4  -3  364.30   21.61
   1   4   3  401.88   22.67
  -1   4  -3  372.02   19.02
  -1  -4  -4  137.40   12.74
   1   4   4  145.45   13.41
  -1  -4  -5  283.85   22.34
   1   4   5  307.74   23.55
  -1  -4  -6  166.37   10.96
  -1  -4  -6  163.24   11.17
  -1  -4  -7  110.05    9.41
  -1  -4  -7  120.54    9.14
  -1  -4  -7  115.66    9.95
  -1  -4  -8  659.12   33.11
  -1  -4  -8  710.61   34.83
  -1  -4  -8  760.39   35.63
  -1  -4  -9    0.57    1.23
  -1  -4  -9    0.99    1.52
  -1  -4  -9    1.98    2.05
  -1  -4 -10  157.68    9.30
  -1  -4 -10  140.83    9.08
   1  -5 -10 1647.17   68.64
   1  -5 -10 1657.57   68.74
   1  -5 -10 1677.42   68.61
   1  -5  -9   13.42    2.73
   1  -5  -9   10.36    2.96
   1  -5  -9   13.26    2.99
   1  -5  -9   10.99    2.92
   1  -5  -8  186.46   13.26
   1  -5  -8  202.71   13.83
   1   5  -7   14.53    3.70
   1  -5  -7   17.13    3.79
   1  -5  -7   14.37    2.87
   1  -5  -6  439.98   32.27
   1   5  -6  421.68   22.34
   1  -5  -6  423.56   22.48
  -1   5   6  449.78   30.88
   1  -5  -5   60.35    9.57
  -1   5   5   65.49    8.87
  -1   5   5   57.32    8.86
   1  -5  -4 2823.03  121.41
  -1   5   4 2896.06  121.94
  -1   5   4 2827.64  118.70
   1  -5  -3   57.23    6.79
  -1   5   3   61.78    7.57
   1  -5  -2  560.61   26.66
  -1   5   2  512.73   26.80
  -1   5   2  587.76   29.17
   1  -5  -2  597.26   31.96
   1  -5  -1   18.98    2.76
   1   5  -1   12.99    2.41
  -1   5   1   12.87    2.61
   1  -5  -1   17.17    3.99
  -1   5   1   13.74    3.23
   1  -5  -1   15.32    2.13
   1   5  -1   16.62    2.71
  -1   5   0  256.33   14.26
   1  -5   0  263.75   15.20
  -1  -5   0  257.12   15.92
   1   5   0  271.94   14.06
   1   5   0  223.55   15.75
   1   5   1   19.38    3.13
  -1  -5  -1   26.87    4.76
   1  -5   1   21.11    3.20
   1  -5   1   20.40    2.77
   1   5   1   24.33    4.75
   1   5   2   65.22    6.60
   1  -5   2   77.45    6.32
   1  -5   2   65.89    5.59
  -1  -5  -2   59.58    7.08
  -1  -5  -3    3.25    1.99
   1   5   3    3.13    1.96
  -1  -5  -3    2.06    2.71
  -1  -5  -4   62.56    8.12
   1   5   4   67.45    8.82
  -1  -5  -4   73.67   10.50
  -1  -5  -5  125.96   13.55
   1   5   5  153.21   15.49
   1   5   6 1016.79   41.66
  -1  -5  -6  910.69   40.87
  -1  -5  -6  918.27   41.06
  -1  -5  -7    4.18    1.92
  -1  -5  -7   -0.39    1.81
  -1  -5  -8  412.62   22.39
  -1  -5  -8  408.21   22.39
  -1  -5  -9   16.52    3.27
  -1  -5  -9   25.38    4.06
  -1  -5 -10  153.50    9.09
  -1  -5 -10  140.40    8.64
   1  -6 -10   36.31    4.12
   1  -6 -10   39.01    4.24
   1  -6 -10   33.39    3.83
   1  -6  -9   12.55    3.10
   1  -6  -9    8.38    2.73
   1  -6  -8  325.10   18.63
   1  -6  -8  324.55   18.59
   1  -6  -7   53.27    6.10
   1   6  -7   51.11    6.80
   1  -6  -6 1777.32   79.81
   1  -6  -6 1992.66   93.22
  -1   6   6 2021.33   92.26
   1  -6  -5  120.98   13.46
  -1   6   5  108.96   12.95
  -1   6   5  111.30   12.23
   1  -6  -4  856.60   45.03
  -1   6   4  976.72   47.80
  -1   6   4  877.56   43.33
   1  -6  -3  524.32   28.38
  -1   6   3  582.81   31.58
   1  -6  -2    4.18    1.76
  -1   6   2    3.29    1.96
   1  -6  -2    7.78    3.37
  -1   6   2    6.10    2.88
  -1   6   1  222.06   14.55
   1  -6  -1  268.89   13.55
  -1   6   1  257.14   16.64
   1  -6  -1  268.72   17.78
   1   6   0 1046.83   55.35
   1  -6   0 1234.17   55.13
  -1  -6   0 1195.13   55.57
  -1  -6  -1 1759.14   75.48
   1  -6   1 1651.11   72.27
   1   6   1 1643.10   72.02
   1  -6   1 1691.63   71.47
   1   6   2   20.81    4.52
   1  -6   2   14.76    3.04
   1   6   2   19.50    3.82
   1  -6   2   18.44    3.06
   1   6   3  104.97   10.18
  -1  -6  -4   48.54    7.25
   1   6   4   57.53    8.43
  -1  -6  -5  148.48   14.73
   1   6   5  155.30   15.96
  -1  -6  -6  315.37   19.09
  -1  -6  -6  359.18   18.74
  -1  -6  -6  364.47   18.75
  -1  -6  -7  188.89   12.63
  -1  -6  -7  180.38   12.45
  -1  -6  -8  958.25   44.12
  -1  -6  -8  997.46   44.17
  -1  -6  -9    7.92    2.28
  -1  -6 -10  116.97    7.41
  -1  -6 -10  106.35    6.86
   1  -7 -10  225.29   12.79
   1  -7 -10  251.61   12.63
   1  -7  -9    4.21    1.83
   1  -7  -9    5.76    2.09
   1  -7  -8 1707.09   71.18
   1  -7  -8 1641.90   71.10
   1  -7  -7  132.59    9.99
   1  -7  -6   93.44    7.90
   1  -7  -6  103.54   13.59
  -1   7   6   95.48   13.10
   1  -7  -5    7.78    3.58
  -1   7   5    9.60    3.70
  -1   7   5   11.37    4.52
   1  -7  -4  522.01   31.85
  -1   7   4  519.72   30.64
  -1   7   3  154.41   11.69
  -1   7   3  205.40   16.44
   1  -7  -3  212.40   16.53
  -1  -7   3  135.18   11.46
   1  -7  -2 2110.80   96.43
  -1   7   2 1968.96   92.55
   1  -7  -1   19.95    4.80
   1  -7  -1   17.76    3.01
  -1   7   1   18.56    3.75
   1  -7   0   20.61    3.38
  -1  -7   0   23.42    4.59
   1  -7   0   18.60    4.01
   1   7   0   25.01    4.93
  -1  -7  -1   -0.52    1.95
   1   7   1    1.43    1.20
   1  -7   1    0.81    1.60
   1  -7   1    0.34    1.06
   1   7   1    1.05    1.77
   1  -7   2  105.08    8.67
   1   7   2  107.32    9.47
   1   7   2  119.22   10.79
   1  -7   3   38.02    5.20
   1   7   3   46.21    6.71
   1   7   3   49.78    7.46
   1   7   3   45.71    7.02
   1   7   4  619.02   37.06
   1   7   4  743.96   38.32
   1   7   5   90.89   11.21
   1   7   5   90.40   12.18
  -1  -7  -5   87.47    7.63
  -1  -7  -5   89.74    6.80
  -1  -7  -5   76.84    6.31
  -1  -7  -6   39.86    5.27
  -1  -7  -6   43.85    4.88
  -1  -7  -6   40.24    4.69
  -1  -7  -7   44.25    5.52
   1   7   7   56.05    5.81
  -1  -7  -7   48.95    5.47
  -1  -7  -7   47.89    5.42
   1   7   8   27.85    4.10
  -1  -7  -8   25.19    4.00
  -1  -7  -8   29.23    4.15
  -1  -7  -9    3.33    1.56
  -1  -7 -10  965.42   40.01
   1  -8 -10   61.47    5.10
   1  -8 -10   57.23    4.59
   1  -8  -9    3.52    1.68
   1  -8  -9    5.97    1.97
  -1   8   8  596.79   28.37
   1  -8  -8  584.71   28.18
   1  -8  -8  578.57   28.43
   1  -8  -7    1.03    1.47
   1  -8  -7    1.35    1.39
   1  -8  -6  724.68   33.46
   1  -8  -5  100.45    8.02
  -1   8   5  114.85   12.99
  -1   8   5  120.55    8.02
  -1   8   4 1919.36   76.82
  -1   8   4 1294.11   67.25
  -1   8   3  473.75   26.52
  -1  -8   3  232.38   18.23
  -1   8   3  304.92   18.90
   1  -8  -3  392.33   24.23
  -1   8   2  751.36   40.93
   1  -8  -2  795.69   43.78
   1  -8  -1  945.91   49.75
   1  -8  -1 1019.96   44.71
   1   8   0  116.21   11.55
  -1  -8   0   95.75    9.83
   1  -8   0  111.69   10.83
   1  -8   0  117.45    9.29
   1   8   1    5.87    2.62
   1  -8   1    4.98    2.45
   1  -8   1    4.89    2.06
  -1  -8  -1    1.67    1.63
   1   8   2  751.06   38.55
   1  -8   2  746.90   37.63
   1   8   3  512.99   29.97
   1  -8   3  492.73   27.66
   1   8   4  547.90   32.98
   1   8   5  359.80   18.99
  -1  -8  -5  376.91   19.62
  -1  -8  -5  342.87   18.36
   1   8   5  390.84   27.90
  -1  -8  -6  364.25   18.96
  -1  -8  -6  299.53   17.17
  -1  -8  -6  339.16   17.85
   1   8   6  355.22   18.39
  -1  -8  -7    0.35    1.43
  -1  -8  -7    0.62    1.16
  -1  -8  -7    0.97    1.28
   1   8   7    2.01    1.69
  -1  -8  -8  297.07   16.23
  -1  -8  -8  301.88   16.53
   1   8   8  303.38   16.34
  -1  -8  -9    4.24    1.60
   1  -9 -10  804.00   33.74
   1  -9  -9  224.97   12.63
   1  -9  -9  229.19   12.91
   1  -9  -8  283.12   16.05
   1  -9  -8  304.03   16.56
  -1   9   8  294.05   16.25
   1  -9  -7  237.89   14.08
   1  -9  -7  232.67   13.91
   1  -9  -6   62.37    5.91
   1  -9  -6   57.19    5.55
  -1   9   6   58.88    5.91
  -1   9   5  239.57   13.96
  -1   9   5  259.54   21.19
  -1   9   4 1541.59   71.22
  -1   9   3  123.48   10.85
  -1  -9   3   91.59   10.64
   1  -9  -2  929.69   48.25
  -1   9   2  886.66   45.78
   1  -9  -1  210.19   17.88
   1  -9   0   22.43    4.26
   1  -9   0   15.66    4.49
   1   9   0   14.34    4.32
  -1  -9  -1    0.60    1.89
   1  -9   1    1.82    2.39
   1  -9   1   -0.49    1.18
   1   9   1    2.61    2.19
   1  -9   2    4.69    2.49
   1   9   2    2.52    1.98
   1  -9   3  299.94   20.84
   1   9   3  355.29   23.15
   1   9   4   12.34    2.40
   1   9   4   11.50    4.05
   1   9   4    8.04    2.00
  -1   9  -4    9.96    2.23
  -1  -9  -5   11.79    2.75
   1   9   5   10.15    2.39
  -1  -9  -6  436.73   22.09
  -1  -9  -6  403.05   21.15
   1   9   6  447.27   21.92
  -1  -9  -7  362.39   18.46
  -1  -9  -7  308.96   17.34
  -1  -9  -7  340.48   17.99
   1   9   7  349.47   18.29
  -1  -9  -8   56.18    5.28
   1   9   8   57.66    5.41
  -1  -9  -8   55.86    5.37
  -1  -9  -8   57.81    5.29
   1   9   9   87.40    5.88
  -1  -9  -9   79.88    5.81
  -1  10   9    8.30    1.94
   1 -10  -9    9.39    2.14
   1 -10  -9    9.86    2.07
  -1  10   8  223.30   13.08
   1 -10  -8  229.49   12.84
   1 -10  -8  212.11   12.81
   1 -10  -7    2.08    1.46
  -1  10   7    1.72    1.59
   1 -10  -7    2.73    1.53
   1 -10  -6 2506.08  101.40
  -1  10   6 2483.74  102.24
  -1  10   5  157.64   10.18
  -1  10   4   12.10    4.05
  -1  10   4   11.09    2.23
  -1  10   4   11.31    2.41
  -1 -10   3    2.37    2.66
  -1 -10   2  174.76   15.76
   1 -10  -2  260.03   20.22
   1 -10  -1   27.51    6.39
   1 -10   0 1063.69   47.16
   1 -10   0  810.99   47.75
   1  10   1  245.59   18.20
   1 -10   1  199.39   15.91
  -1 -10  -1  226.13   17.21
   1  10   2  621.84   31.72
   1 -10   2  431.93   27.86
   1  10   3    0.74    1.54
   1 -10   3    2.65    2.23
   1  10   4  539.95   25.02
   1  10   4  561.44   33.41
   1  10   4  512.43   24.89
   1  10   5   30.53    4.01
  -1 -10  -5   31.21    4.08
  -1 -10  -6    3.39    1.77
   1  10   6    5.47    1.95
   1  10   6    2.53    1.77
  -1 -10  -7   39.92    4.64
  -1 -10  -7   43.60    4.68
   1  10   7   42.94    4.85
  -1 -10  -8 1116.90   44.95
  -1 -10  -8  976.32   44.61
   1  10   8 1074.23   45.12
  -1 -10  -9    0.62    0.95
   1  10   9    0.63    0.81
  -1  11   9   65.66    4.94
   1 -11  -9   59.84    4.99
   1 -11  -9   60.80    4.72
   1 -11  -9   60.98    4.85
   1 -11  -8  479.50   23.16
  -1  11   8  530.50   24.05
   1 -11  -8  491.72   23.52
  -1  11   7  257.29   14.92
   1 -11  -7  255.27   14.26
  -1  11   6   41.99    5.02
   1 -11  -6   49.40    5.07
  -1  11   5  154.96   10.10
  -1  11   5  135.65    9.59
  -1  11   4  542.01   26.54
  -1  11   4  605.02   26.85
  -1  11   3  332.86   16.81
   1 -11  -3  356.11   16.91
   1  11  -3  311.89   17.12
  -1  11   3  361.70   16.92
  -1 -11   2  575.74   38.02
   1 -11  -2  911.02   44.44
   1 -11  -1    7.37    3.96
   1 -11   0   19.60    5.68
   1 -11   0   27.91    5.72
   1 -11   1    3.61    2.43
   1  11   1    2.31    2.59
  -1  11  -2    5.12    1.66
   1  11   2    9.95    3.76
   1 -11   2    7.40    3.18
  -1  11  -3   37.44    4.25
   1  11   3   30.31    3.69
   1  11   3   43.52    7.55
   1 -11   3   32.74    6.50
   1  11   3   37.70    4.14
   1  11   4  103.61    7.53
   1  11   4  104.57    7.56
  -1  11  -4   84.45    7.13
  -1 -11  -5  329.49   17.13
   1  11   5  319.00   17.21
  -1 -11  -6   51.42    5.33
   1  11   6   57.16    5.62
   1  11   6   51.07    5.26
  -1 -11  -7  163.30   10.11
   1  11   7  152.99    9.95
  -1 -11  -8   32.15    3.45
   1  11   8   26.48    3.30
  -1 -11  -9  136.45    7.94
  -1  12   9    3.13    1.17
  -1  12   8  491.80   23.01
   1 -12  -7   69.59    5.93
  -1  12   7   67.45    6.13
  -1  12   7   63.13    5.87
  -1  12   6  710.13   33.20
   1 -12  -6  727.94   32.65
  -1  12   5   61.94    5.82
  -1  12   5   55.78    5.64
  -1  12   4  876.17   38.66
  -1  12   4  902.92   38.83
   1  12  -4  832.81   39.21
  -1  12   3   36.32    4.17
   1 -12  -3   40.70    4.35
  -1  12   3   43.99    4.49
   1  12  -3   32.98    4.39
  -1  12   2  706.35   28.72
   1  12  -2  625.43   29.23
   1  12  -2  591.30   28.25
   1 -12  -2  692.00   39.63
   1  12  -1    1.48    1.49
   1  12  -1    4.18    1.66
   1 -12  -1   -0.96    3.01
  -1 -12   1   -0.90    3.37
   1  12   0  122.30    8.27
  -1 -12   0   95.35   12.31
   1 -12   0   88.44   11.47
   1  12   0   90.83    7.03
   1  12   1  534.65   24.71
  -1  12  -1  524.17   26.02
   1 -12   1  492.89   32.88
   1  12   1  596.22   25.72
  -1  12  -2  793.61   35.79
   1  12   2  825.73   34.78
   1  12   2  871.87   44.29
   1  12   3   33.67    3.92
  -1  12  -3   33.90    4.35
   1  12   3   34.87    4.00
   1  12   4  154.41    9.88
  -1  12  -4  153.52   10.46
   1  12   4  153.47    9.98
   1  12   5    1.53    1.32
   1  12   5    4.34    1.69
  -1 -12  -5    4.14    1.89
   1  12   6  380.80   19.86
  -1 -12  -6  418.10   20.44
   1  12   6  427.97   20.57
   1  12   7  132.45    8.86
  -1 -12  -7  150.35    9.24
   1  12   7  151.88    9.27
   1  12   8  280.01   14.37
  -1 -12  -8  313.80   14.52
  -1  13   8 1050.39   43.87
  -1  13   8 1041.86   43.74
  -1  13   7   64.01    5.75
   1 -13  -7   80.08    6.22
  -1  13   7   84.62    6.50
   1 -13  -6   95.93    7.23
  -1  13   6   88.20    7.28
  -1  13   5  330.32   17.81
  -1  13   5  334.61   17.59
  -1  13   4  201.80   12.09
  -1  13   4  206.32   11.99
   1  13  -4  168.21   12.00
  -1  13   3    4.49    1.78
   1  13  -3    6.96    2.39
  -1  13   2 1038.98   46.04
   1  13  -2 1129.42   46.51
   1  13  -2 1058.85   47.25
   1  13  -1  267.32   15.05
   1  13  -1  259.04   14.34
   1 -13  -1  259.83   22.48
   1  13   0   20.76    3.16
   1  13   0   24.19    3.60
   1  13   1    0.52    1.11
  -1  13  -1    0.71    1.46
  -1  13  -2   26.50    4.13
   1  13   2   32.08    3.73
   1  13   3  445.31   21.49
  -1  13  -3  429.39   22.82
   1  13   3  452.03   21.66
   1  13   4  458.40   21.80
  -1  13  -4  434.78   23.02
   1  13   4  443.56   21.90
   1  13   5    5.26    1.89
  -1 -13  -5    1.60    1.46
   1  13   6   44.75    4.43
  -1 -13  -6   51.39    4.93
   1  13   6   42.75    4.53
   1  13   7   37.40    3.85
   1  13   7   47.10    4.26
  -1 -13  -7   41.63    4.17
   1  13   8   11.92    1.84
  -1  14   8  153.57    8.46
  -1  14   8  161.94    8.55
  -1  14   7   16.69    2.58
  -1  14   7   16.69    2.68
   1 -14  -7   21.77    2.92
  -1  14   6  972.06   43.98
  -1  14   6 1002.50   44.78
  -1  14   5   23.61    3.52
  -1  14   5   19.51    3.20
  -1  14   4   71.16    6.36
   1  14  -4   76.70    6.99
  -1  14   4   62.55    5.88
   1  14  -3  103.25    8.68
  -1  14   3  115.30    8.29
   1  14  -2   15.78    3.00
   1  14  -2   17.26    3.46
  -1  14   2   19.42    3.15
   1  14  -1  813.60   35.35
   1  14  -1  842.91   36.17
   1  14   0  704.05   32.08
   1  14   0  716.36   32.54
   1  14   1   72.43    5.93
  -1  14  -1   54.64    6.31
  -1  14  -2   30.95    4.68
   1  14   2   26.85    3.51
   1  14   3  531.52   24.74
  -1  14  -3  519.55   26.66
   1  14   3  520.00   24.69
  -1  14  -4    5.00    2.44
   1  14   4    9.48    2.16
  -1  14  -5  135.40   10.25
   1  14   5  147.23    9.48
  -1 -14  -5  158.24    9.63
   1  14   6    5.42    1.54
   1  14   6    3.86    1.39
  -1 -14  -6    5.79    1.77
   1  14   7    5.75    1.43
   1  14   7    5.53    1.52
  -1 -14  -7    7.59    1.75
  -1  15   7   31.31    3.11
  -1  15   7   26.65    3.06
   1 -15  -7   30.44    3.18
  -1  15   6  163.56   10.05
   1 -15  -6  175.48   10.07
  -1  15   5   63.79    5.69
  -1  15   5   60.11    5.45
   1  15  -4  944.03   44.10
  -1  15   4 1056.63   44.06
  -1  15   4 1011.72   43.70
   1  15  -3   84.34    7.38
  -1  15   3   74.08    6.44
   1  15  -2  152.73   10.69
   1  15  -2  177.40   10.62
  -1  15   2  152.03   10.09
   1  15  -1   38.81    4.71
  -1  15   1   41.10    4.77
   1  15  -1   37.27    4.45
   1  15   0   71.01    6.15
  -1  15   0   58.66    5.96
   1  15   0   65.54    5.92
  -1  15  -1    6.18    2.30
   1  15   1    6.81    1.90
  -1  15  -1    2.59    1.64
  -1  15  -2    0.41    2.11
  -1  15  -2    1.26    1.67
   1  15   2    2.74    1.42
  -1  15  -3   82.51    7.82
   1  15   4    7.08    2.00
  -1  15  -4   13.22    3.23
   1  15   5  207.35   11.64
  -1 -15  -5  227.84   11.89
  -1 -15  -6  498.69   21.91
   1  15   6  452.42   21.55
   1  15   7    2.99    1.09
  -1 -15  -7    2.07    1.13
  -1  16   7   71.39    4.83
   1 -16  -7   79.41    4.99
  -1  16   6  792.40   35.65
   1 -16  -6  890.32   35.93
   1 -16  -5  430.88   20.17
  -1  16   5  415.87   20.19
   1  16  -4  248.16   14.19
  -1  16   4  265.34   14.06
   1  16  -3  120.71    8.83
  -1  16   3  115.64    8.23
   1  16  -2    6.40    2.34
   1  16  -2    8.40    2.11
  -1  16   2    6.36    1.99
  -1  16   1  164.19   10.69
   1  16  -1  165.98   10.40
   1  16  -1  162.58   10.50
   1  16   0  156.87    9.79
  -1  16   0  142.56   10.11
   1  16   0  149.31    9.68
  -1  16  -1 1506.13   65.25
   1  16   1 1519.75   63.99
  -1  16  -1 1625.16   66.24
  -1  16  -2   10.45    2.62
  -1  16  -2   12.35    3.08
  -1  16  -3   91.24    8.04
   1  16   4    1.56    1.16
  -1  16  -4    1.68    1.64
  -1 -16  -4    0.21    1.17
  -1  16  -5  148.79    9.58
  -1 -16  -5  135.02    8.40
   1  16   5  150.18    8.67
   1  16   6  136.30    7.93
  -1 -16  -6  151.02    8.20
  -1  17   6   95.38    5.87
   1 -17  -6   97.97    5.97
  -1  17   5   18.19    2.48
   1 -17  -5   16.52    2.47
   1  17  -4   16.51    2.67
   1  17  -3   42.69    4.61
   1  17  -3   46.89    4.36
  -1  17   3   39.68    4.22
   1  17  -2  600.10   27.63
   1  17  -2  589.29   27.16
   1  17  -1  251.16   13.76
   1  17  -1  244.74   13.69
  -1  17   1  258.90   14.17
   1  17   0   13.17    2.58
   1  17   0   11.94    2.47
  -1  17   0   12.73    2.77
  -1  17  -1    0.91    1.40
   1  17   1   -0.46    1.31
  -1  17  -1    0.30    1.54
  -1  17  -2   13.58    2.97
  -1  17  -2   12.50    2.65
  -1  17  -3  171.95   11.10
  -1  17  -4  146.72    9.28
  -1 -17  -4  127.02    7.80
  -1  17  -5  145.26    8.58
  -1 -17  -5  143.55    8.02
   1  17   5  140.01    7.95
  -1 -17  -6    8.46    1.43
   1 -18  -5   78.49    5.15
   1  18  -4  380.47   17.66
   1  18  -3   91.93    6.45
   1  18  -2  181.82   10.54
   1  18  -2  191.85   10.57
   1  18  -1  793.75   34.53
   1  18  -1  796.32   34.71
  -1  18   1  799.51   34.87
   1  18   0    3.07    1.39
  -1  18   0    4.81    1.77
  -1  18  -1   16.17    2.75
  -1  18  -1   14.67    2.72
   1  18   1   14.04    2.39
  -1  18  -2  115.28    8.03
  -1  18  -2  116.56    7.81
  -1  18  -3  471.47   22.13
  -1  18  -4   52.29    4.48
  -1 -18  -4   51.48    3.94
  -1  18  -5  185.64    9.59
  -1 -18  -5  201.61    9.50
   1  19  -4  459.35   20.54
   1 -19  -4  498.28   20.77
   1  19  -3   12.50    1.95
   1  19  -2  119.19    7.03
   1  19  -2  111.82    6.97
   1  19  -1  213.07   11.39
  -1  19   1  229.40   11.52
   1  19  -1  214.80   11.23
  -1  19   0   30.81    3.44
   1  19   0   31.21    3.29
   1  19   1    0.66    0.98
  -1  19  -1   -0.20    1.03
  -1  19  -1   -0.18    0.86
  -1  19  -2    3.04    1.26
  -1  19  -2    2.71    1.22
  -1  19  -3  294.25   14.16
  -1  19  -4    0.64    0.77
   1  20  -3    5.44    1.17
   1  20  -2  110.79    6.20
   1  20  -2  108.23    6.14
   1  20  -1    1.10    0.73
   1  20  -1    0.64    0.71
  -1  20   0  445.68   19.40
   1  20   0  427.28   19.20
  -1  20  -1  377.74   17.07
  -1  20  -2  137.21    7.26
  -1  20  -2  130.98    7.16
   2   0 -11    0.50    1.40
   2   0 -10  425.43   23.16
   2   0 -10  375.87   19.21
   2   0  -9    0.84    1.10
   2   0  -9    1.90    2.12
   2   0  -9   -1.41    3.14
   2   0  -8    2.58    2.06
   2   0  -8    3.85    1.91
   2   0  -8    4.17    1.68
   2   0  -7    0.59    1.17
   2   0  -7   -0.31    1.21
   2   0  -7    3.84    2.77
   2   0  -7    1.75    1.19
   2   0  -6  701.07   35.17
   2   0  -5   -1.40    3.32
   2   0  -5    2.29    1.51
   2   0  -4  464.83   23.02
   2   0  -4  464.45   24.23
   2   0  -3    1.18    2.54
   2   0  -3    1.10    1.27
  -2   0   3    3.22    1.20
   2   0  -3    0.59    0.78
   2   0  -3    0.25    0.92
   2   0  -2  236.82   13.49
  -2   0   2  191.37   10.61
   2   0  -2  202.13   11.58
   2   0  -2  255.10   10.93
   2   0  -1    3.44    1.42
  -2   0   1    7.07    0.91
  -2   0   1    0.47    0.60
   2   0  -1   10.05    1.07
   2   0  -1    1.12    0.60
   2   0  -1    1.55    4.60
  -2   0   0  932.18   37.81
  -2   0  -1    0.23    1.04
  -2   0  -1    1.51    0.89
  -2   0  -2 9999.00  363.06
  -2   0  -2 9032.61  364.00
  -2   0  -2 9018.09  359.93
  -2   0  -3    1.82    2.04
  -2   0  -4  121.02   13.52
  -2   0  -5   -1.16    2.76
  -2   0  -5    0.60    1.58
  -2   0  -6   91.40    8.19
  -2   0  -6  116.45   16.27
  -2   0  -6  107.96    7.59
  -2   0  -6   99.64   11.35
  -2   0  -6   89.39    8.63
  -2   0  -7    0.55    2.19
  -2   0  -7    1.84    1.97
  -2   0  -8 1273.81   58.28
  -2   0  -9   -1.01    2.08
  -2   0 -10  207.01   12.92
   2  -1 -11   27.97    3.59
   2   1 -11   29.44    3.71
   2  -1 -10  440.56   21.30
   2   1 -10  404.79   20.88
   2   1 -10  475.98   25.44
   2  -1 -10  476.68   24.44
   2  -1  -9  361.66   19.75
   2   1  -9  337.98   20.10
   2  -1  -9  366.87   18.70
   2   1  -9  362.18   18.71
   2  -1  -9  406.36   23.74
   2   1  -9  379.20   25.26
   2   1  -8  150.42   11.58
   2  -1  -8  150.88   10.98
   2   1  -8  174.34   11.87
   2  -1  -8  163.36   10.24
   2   1  -7  189.06   12.06
   2   1  -7  222.71   11.27
   2   1  -7  182.61   15.16
   2  -1  -7  192.89   13.78
   2  -1  -7  176.06   14.59
   2   1  -7  161.60   11.61
   2  -1  -7  188.52   11.64
   2  -1  -6   50.03   13.00
   2  -1  -6   28.79    4.87
   2  -1  -5  515.49   37.45
   2   1  -5  447.19   23.96
   2  -1  -5  456.11   23.91
   2   1  -4   41.05    7.94
   2  -1  -4   47.11    9.09
   2   1  -4   36.07    4.21
   2   1  -4   28.15    4.42
   2  -1  -4   30.03    3.82
  -2   1   4   29.44    4.31
   2  -1  -4   34.59    4.54
   2  -1  -3  473.41   25.76
   2   1  -3  458.35   26.33
  -2   1   3  380.40   20.54
   2   1  -3  441.86   21.76
   2   1  -3  465.45   20.55
   2  -1  -3  434.24   21.21
   2   1  -3  430.11   21.49
   2  -1  -3  439.07   20.31
   2  -1  -2 1218.99   53.49
   2   1  -2 1459.06   54.65
   2  -1  -2 1413.01   55.05
   2   1  -2 1259.22   52.27
   2  -1  -2 1275.11   51.83
  -2   1   2 1154.63   51.24
   2   1  -2 1301.94   50.81
  -2  -1   2 1160.68   50.06
   2   1  -2 1233.68   53.50
   2  -1  -1    6.48    1.67
   2   1  -1    6.88    1.71
  -2  -1   1    9.06    1.21
   2  -1  -1    7.17    1.37
  -2   1   1    6.82    1.44
  -2  -1   1    7.59    1.19
  -2  -1   0  597.79   25.82
  -2   1   0  611.27   25.28
   2  -1   0  614.95   25.28
  -2   1   0  675.54   27.30
  -2  -1   0  585.12   25.81
  -2  -1  -1    3.11    1.18
  -2   1  -1    3.03    0.94
  -2  -1  -1    3.11    1.37
  -2   1  -1    2.92    1.39
   2  -1   1    3.57    0.95
  -2  -1  -2  139.33    8.07
  -2   1  -2  140.86    7.60
  -2   1  -2  125.39    8.82
  -2  -1  -2  136.86    9.54
  -2  -1  -2  124.28   10.25
  -2   1  -2  127.57    9.75
   2   1   2  106.16    9.96
   2  -1   2  137.05    7.43
  -2   1  -3  115.35   10.85
  -2  -1  -3   88.12   10.02
   2   1   3  110.08   10.97
  -2  -1  -4 1887.27   86.55
  -2   1  -4 1818.33   86.38
  -2   1  -5  230.08   16.39
  -2  -1  -5  225.26   17.11
  -2   1  -5  203.08   21.15
  -2  -1  -5  271.40   22.82
  -2   1  -6 2043.81   90.03
  -2  -1  -6 2004.90   88.71
  -2   1  -6 2204.44   95.86
  -2  -1  -6 2244.64   97.67
  -2  -1  -6 2228.69   90.92
  -2  -1  -7  107.35   10.37
  -2   1  -7   96.01    9.56
  -2  -1  -7  104.99    9.13
  -2  -1  -8    6.35    3.38
  -2   1  -8    1.80    2.26
  -2  -1  -8    4.20    2.29
  -2  -1  -9  154.28   12.99
  -2  -1  -9  178.74   12.62
  -2   1  -9  191.36   14.76
  -2  -1 -10  137.61    9.60
  -2   1 -10  165.24   11.41
   2  -2 -11   12.75    2.36
   2  -2 -10   84.69    6.58
   2  -2 -10   80.24    7.75
   2   2  -9   16.05    2.97
   2  -2  -9   19.52    3.25
   2   2  -9   22.58    5.85
   2  -2  -9   20.77    4.43
   2   2  -9   18.66    4.15
   2  -2  -9   19.86    3.54
   2   2  -8   28.02    3.75
   2  -2  -8   23.87    3.45
   2   2  -8   20.50    4.13
   2  -2  -8   27.79    5.10
   2  -2  -8   43.19    4.89
   2   2  -8   36.24    5.48
   2  -2  -7    5.29    2.33
   2   2  -7    5.38    1.64
   2   2  -7    6.83    2.47
   2   2  -7    5.87    2.40
   2  -2  -7    6.58    1.89
   2  -2  -7    4.27    2.19
   2  -2  -6   61.67    7.31
   2  -2  -6   80.77   15.55
  -2   2   5    8.45    3.08
   2  -2  -5    4.16    1.81
   2  -2  -5    7.73    4.85
   2   2  -4   72.56    7.36
   2  -2  -4   82.73    7.06
  -2   2   4   61.18    6.80
   2  -2  -4   89.70   11.28
   2   2  -3  120.79    9.16
   2   2  -3  116.85    8.81
   2  -2  -3  123.85    8.14
  -2   2   3  116.14    8.56
   2  -2  -3  123.95   10.79
   2  -2  -2  340.87   18.34
   2   2  -2  415.04   21.59
   2   2  -2  428.48   20.33
   2  -2  -2  409.46   19.07
   2  -2  -2  608.16   27.60
  -2   2   2  380.57   19.56
   2   2  -2  568.17   21.80
   2  -2  -2  407.94   20.92
  -2  -2   1   16.01    2.04
   2  -2  -1   12.43    2.55
   2   2  -1   11.65    1.72
   2   2  -1   11.00    2.13
   2   2  -1   14.76    4.35
  -2   2   1   13.26    2.11
   2  -2  -1   16.42    1.51
   2  -2  -1   12.42    2.30
  -2  -2   0 4315.13  177.31
  -2  -2   0 4475.18  176.42
   2  -2   0 4621.99  175.68
  -2   2   0 4560.17  177.87
  -2  -2  -1 1053.96   47.64
  -2  -2  -1 1116.32   48.74
   2   2   1 1032.15   48.87
   2  -2   1 1166.04   45.87
  -2  -2  -2 1410.80   66.36
   2  -2   2 1699.62   65.22
   2   2   2 1627.89   70.21
  -2  -2  -2 1640.46   70.69
  -2  -2  -2 1675.97   68.81
  -2   2  -2 1632.93   67.17
  -2   2  -2 1643.72   69.03
   2   2   3   22.13    4.86
  -2   2  -3   25.76    5.04
  -2  -2  -3   23.81    5.10
  -2   2  -4 1787.80   80.97
  -2  -2  -4 2019.86   83.96
  -2   2  -4 1911.89   89.02
  -2  -2  -4 2043.32   89.18
  -2   2  -5  140.84   12.15
  -2  -2  -5  186.55   18.13
  -2  -2  -5  152.63   13.95
  -2  -2  -6  692.90   32.46
  -2  -2  -6  715.53   32.15
  -2  -2  -6  634.78   30.82
  -2   2  -6  550.62   32.05
  -2  -2  -6  843.74   47.97
  -2   2  -6  665.11   36.34
  -2  -2  -6  712.83   39.69
  -2  -2  -7    4.82    2.50
  -2  -2  -7    3.08    1.78
  -2   2  -7    0.57    2.04
  -2  -2  -7    2.57    2.45
  -2  -2  -8  401.68   22.12
  -2   2  -8  406.80   25.56
  -2  -2  -8  400.70   24.32
  -2   2  -9   23.99    5.59
  -2  -2  -9   18.97    3.60
  -2  -2  -9   21.28    4.53
  -2   2 -10  315.58   17.62
  -2  -2 -10  250.62   14.15
   2  -3 -11   17.65    2.63
   2  -3 -10    5.36    1.81
   2  -3 -10    7.37    2.51
   2   3  -9   70.35    6.20
   2  -3  -9   69.80    6.12
   2  -3  -9   82.09    8.09
   2  -3  -9   76.12    6.74
   2   3  -9   59.79    7.61
   2   3  -8  586.90   32.73
   2   3  -8  778.39   31.53
   2  -3  -8  651.19   31.09
   2   3  -8  597.38   33.30
   2  -3  -8  802.94   36.60
   2  -3  -8  626.40   32.57
   2  -3  -7  213.79   13.80
   2   3  -7  235.81   12.58
   2   3  -7  208.59   14.09
   2  -3  -7  231.74   27.48
   2  -3  -7  178.65   15.54
   2  -3  -7  243.91   16.94
   2   3  -7  208.04   14.30
   2  -3  -7  237.41   12.86
   2  -3  -6  283.49   18.69
  -2   3   6  333.66   23.60
   2  -3  -6  329.76   29.71
  -2   3   5   50.49    7.38
   2  -3  -5   75.24   11.92
   2   3  -4  188.38   13.63
   2  -3  -4  197.07   12.33
  -2   3   4  184.86   13.76
   2  -3  -4  218.66   17.31
   2   3  -3   61.32    6.60
   2  -3  -3   82.63    5.98
  -2   3   3   56.44    6.15
   2   3  -3   68.68    6.49
   2  -3  -3   62.03    7.08
   2   3  -2 1289.66   58.14
   2   3  -2 1361.52   56.59
   2  -3  -2 1406.90   54.95
  -2   3   2 1161.82   56.22
   2  -3  -2 1276.63   57.07
   2  -3  -1  127.70    8.88
   2   3  -1  103.86    7.68
  -2   3   1  123.64    8.50
   2  -3  -1  129.57    8.78
   2  -3  -1  171.02    7.27
   2   3  -1  165.80   11.25
  -2   3   0 1675.55   71.27
   2  -3   0 1822.74   70.82
   2  -3   0 1775.50   69.23
   2   3   0 1708.43   74.40
  -2  -3   0 1680.30   69.88
  -2  -3  -1   49.43    5.49
   2   3   1   52.38    5.60
   2  -3   1   53.17    3.90
  -2  -3  -1   46.89    5.34
  -2   3  -1   49.83    4.22
  -2  -3  -1   47.10    4.73
  -2  -3  -2   16.28    3.39
  -2  -3  -2   13.29    3.02
  -2  -3  -2    5.44    2.80
  -2   3  -2   10.69    2.87
  -2   3  -2   10.73    2.25
   2  -3   2   18.82    2.29
   2   3   2   13.12    3.33
  -2  -3  -3   11.78    3.98
  -2   3  -3    4.51    2.34
   2   3   3   13.41    3.93
  -2  -3  -4 3297.21  127.41
  -2  -3  -4 2773.54  120.56
  -2   3  -4 2647.67  117.35
  -2   3  -4 2762.36  125.23
   2   3   4 3240.47  125.55
  -2   3  -5   71.05    7.98
  -2  -3  -5   58.33    8.78
  -2   3  -6  756.12   39.53
  -2  -3  -6  826.74   44.35
  -2  -3  -6  613.14   33.01
  -2  -3  -6  795.06   35.35
  -2   3  -6  636.10   35.92
  -2  -3  -6  819.44   34.47
  -2  -3  -6  801.92   34.97
  -2  -3  -7   46.36    6.10
  -2   3  -7   38.15    6.65
  -2  -3  -7   44.44    5.38
  -2  -3  -7   47.72    6.08
  -2   3  -8  348.67   24.54
  -2  -3  -8  376.06   20.78
  -2  -3  -9   99.93    8.91
  -2   3  -9  105.90   11.75
  -2  -3  -9   96.97    7.94
  -2  -3 -10  395.39   19.86
  -2  -3 -10  452.47   20.19
   2  -4 -11    4.65    1.45
   2  -4 -11    5.53    1.65
   2  -4 -10  138.29    9.57
   2  -4 -10  125.71    8.59
   2  -4  -9    2.88    1.69
   2  -4  -9    1.09    1.22
   2  -4  -9    1.28    1.83
   2   4  -9    1.60    2.29
   2  -4  -8    1.36    2.09
   2  -4  -8    0.39    1.60
   2   4  -8    3.78    1.70
   2   4  -8    5.75    3.17
   2  -4  -8    4.01    2.60
   2   4  -8    2.76    2.46
   2  -4  -7   89.38    7.82
   2   4  -7  109.69    7.65
   2   4  -7  103.49    9.34
   2  -4  -7  124.01   18.20
   2  -4  -7   95.18   10.62
   2  -4  -7   97.31    9.52
  -2   4   6   71.66   10.62
   2  -4  -6   69.21    7.89
   2  -4  -6   82.43   13.33
  -2   4   5  115.34   12.05
   2  -4  -5  108.71   13.65
   2   4  -4  104.83    9.73
  -2   4   4   95.91    9.92
   2  -4  -4  116.96   11.75
  -2   4   3  953.35   47.04
   2   4  -3 1068.34   46.49
   2  -4  -3  932.50   47.05
   2  -4  -2   47.35    5.26
  -2   4   2   36.22    3.62
   2   4  -2   48.70    5.88
  -2   4   2   46.88    5.40
   2  -4  -1  340.86   18.28
   2   4  -1  281.30   17.04
  -2   4   1  309.91   18.04
   2  -4  -1  336.39   18.76
   2   4  -1  362.23   19.71
   2  -4   0  734.98   33.71
   2   4   0  762.60   34.19
   2  -4   0  781.29   32.08
  -2   4   0  675.01   33.72
   2   4   1  520.35   26.88
   2  -4   1  596.00   26.27
   2  -4   1  529.56   24.34
  -2  -4  -1  592.31   26.98
  -2  -4  -2 5184.25  200.88
  -2  -4  -2 4863.66  202.60
  -2  -4  -2 5209.74  203.49
  -2   4  -2 5167.50  202.34
   2   4   2 4826.51  201.89
   2  -4   2 5001.24  197.70
  -2  -4  -3   64.58    8.62
  -2   4  -3   62.92    7.92
   2   4   3   74.20    8.59
  -2  -4  -4  556.41   32.03
   2   4   4  418.45   28.30
  -2  -4  -5  525.18   34.92
   2   4   5  513.52   33.23
  -2  -4  -6  232.08   13.50
  -2  -4  -6  233.02   13.57
  -2  -4  -7   32.69    4.82
  -2  -4  -7   34.02    4.99
  -2  -4  -8  882.99   40.81
  -2  -4  -8  834.48   39.19
  -2  -4  -8  888.41   40.99
  -2  -4  -9    8.69    2.32
  -2  -4  -9   12.03    2.91
  -2  -4 -10  201.10   10.87
   2  -5 -10  901.58   41.47
   2  -5 -10 1020.32   42.70
   2  -5 -10  999.72   42.19
   2  -5  -9   17.67    3.05
   2  -5  -9   24.06    4.04
   2  -5  -9   26.74    4.36
   2  -5  -9   25.94    4.46
   2   5  -8   39.80    6.37
   2  -5  -8   43.71    5.70
   2  -5  -8   33.51    4.71
   2   5  -7    2.02    2.55
   2  -5  -7    3.07    2.28
   2  -5  -7    4.10    1.88
   2   5  -6  645.41   33.73
   2   5  -6  830.20   32.37
   2  -5  -6  792.70   46.66
  -2   5   6  759.62   41.92
  -2   5   6  694.96   42.46
   2  -5  -6  628.45   33.79
  -2   5   5   20.63    4.61
  -2   5   5   22.54    5.57
   2  -5  -5   25.46    6.30
  -2   5   4  268.21   19.41
   2  -5  -4  270.60   19.41
  -2   5   3    3.69    2.09
   2  -5  -3    4.04    3.00
   2  -5  -3    4.09    2.03
   2  -5  -2 1780.43   77.47
  -2   5   2 1684.17   75.41
   2   5  -2 1882.01   79.43
  -2   5   2 2075.73   80.41
   2  -5  -2 2193.72   83.68
   2  -5  -1    3.17    1.81
   2   5  -1    3.09    1.51
  -2   5   1    1.18    1.48
   2  -5  -1    0.84    0.72
   2  -5  -1    2.51    2.11
   2   5  -1    1.49    1.59
   2  -5   0  980.18   45.26
  -2  -5   0 1044.94   45.32
   2  -5   0 1090.45   43.49
   2   5   0 1113.60   45.36
   2   5   0 1062.77   47.47
   2   5   1   27.74    4.18
   2  -5   1   33.28    3.54
   2  -5   1   35.00    4.30
   2   5   2  200.46   14.75
   2  -5   2  222.04   12.67
   2  -5   2  259.51   14.64
  -2  -5  -2  268.68   16.43
  -2   5  -2  216.80   15.52
  -2  -5  -3   16.43    3.81
   2   5   3   18.18    4.32
  -2  -5  -3   20.46    4.85
   2   5   4  859.58   48.45
  -2  -5  -4 1091.99   52.64
   2   5   5    0.95    1.60
  -2  -5  -5    2.18    2.90
  -2  -5  -6 2549.77  100.55
  -2  -5  -6 2615.28  100.76
   2   5   6 2709.67  101.16
  -2  -5  -7    4.75    2.45
  -2  -5  -7    4.11    1.89
  -2  -5  -7    4.82    2.21
  -2  -5  -8   46.02    5.74
  -2  -5  -8   63.53    6.55
  -2  -5  -9   -0.30    1.48
  -2  -5 -10    1.36    1.05
   2  -6 -10  140.41    9.14
   2  -6 -10  150.91    9.50
   2  -6 -10  153.04    9.39
   2  -6  -9    1.89    1.25
   2  -6  -9    1.72    1.54
   2  -6  -9    5.73    2.26
   2  -6  -9    2.06    1.87
   2   6  -8   25.46    5.43
   2  -6  -8   33.39    4.83
   2  -6  -8   36.72    5.17
   2  -6  -7   14.02    3.47
   2   6  -7   22.07    4.64
  -2   6   6   51.61    9.29
  -2   6   6   40.31    8.54
   2  -6  -6   38.67    5.10
  -2   6   5  475.28   29.10
  -2   6   5  543.61   33.03
   2  -6  -5  493.38   32.06
  -2   6   4  148.69   14.16
   2  -6  -4  145.32   13.46
  -2   6   3  200.41   15.54
   2  -6  -3  228.19   17.28
   2  -6  -3  168.30   13.17
   2  -6  -2   42.02    5.33
  -2   6   2   52.08    5.28
   2  -6  -2   47.52    7.58
  -2   6   2   65.58    7.84
   2   6  -2   56.67    6.66
  -2   6   1  335.88   21.17
   2  -6  -1  358.07   21.70
   2   6  -1  312.47   19.23
  -2   6   0  455.14   25.35
   2  -6   0  536.58   23.89
   2  -6   0  470.84   25.73
   2   6   0  570.00   27.73
   2  -6   1 1442.41   63.37
   2   6   1 1441.56   63.50
   2  -6   1 1498.14   61.80
   2   6   1 1514.34   65.22
   2   6   2 3126.14  138.24
   2  -6   2 3330.77  135.37
   2   6   3  690.62   39.40
  -2  -6  -3  917.73   42.99
   2   6   4  163.06   15.65
  -2  -6  -4  211.60   18.41
  -2  -6  -5  184.49   13.38
  -2  -6  -5  212.95   11.98
  -2  -6  -5  206.82   12.11
   2   6   5  218.00   12.46
  -2  -6  -6  123.52   10.62
  -2  -6  -6  125.62    9.13
  -2  -6  -6  145.33    9.76
   2   6   6  147.36    9.98
  -2  -6  -7    6.56    2.51
   2   6   7    7.81    2.45
  -2  -6  -7   12.37    2.90
  -2  -6  -7   10.21    2.74
  -2  -6  -8 1066.46   47.77
  -2  -6  -8 1098.04   47.74
  -2  -6  -9   73.10    6.38
  -2  -6  -9   96.79    6.98
   2  -7 -10   22.76    3.14
   2  -7 -10   15.23    2.62
   2  -7 -10   24.61    3.14
   2  -7  -9  201.64   12.35
   2  -7  -9  217.01   13.21
   2  -7  -8  832.18   38.49
   2  -7  -8  834.40   38.68
   2  -7  -7    6.80    2.47
   2  -7  -6  318.94   18.23
  -2   7   6  338.99   25.85
   2  -7  -6  364.03   27.68
  -2   7   5    5.75    2.96
  -2   7   5    3.97    2.89
   2  -7  -5    2.72    2.42
  -2   7   4  508.94   31.15
   2  -7  -4  437.18   27.77
  -2   7   3  238.24   18.26
   2  -7  -3  231.90   18.14
   2  -7  -3  193.33   14.53
  -2   7   2  256.24   18.62
   2  -7  -2  249.57   18.91
  -2   7   2  207.06   13.93
  -2   7   1  108.44   11.08
   2  -7  -1  124.63    8.26
   2  -7  -1  112.13   11.30
   2   7  -1  103.63    9.54
   2  -7   0 1028.59   46.97
   2  -7   0 1028.47   49.98
   2  -7   1    2.99    1.54
   2   7   1    4.16    1.79
   2  -7   1    1.79    1.77
   2   7   1    2.82    1.86
   2  -7   2    5.51    1.96
   2  -7   2    2.28    1.88
   2   7   2    2.26    1.65
   2   7   3   30.21    5.83
   2  -7   3   29.23    4.54
  -2  -7  -3   42.17    6.93
   2   7   3   41.99    7.06
   2   7   4 2848.73  124.45
   2   7   4 2849.89  124.49
   2   7   5   52.51    5.32
  -2  -7  -5   58.17    6.50
  -2  -7  -5   54.43    5.22
   2   7   5   68.96   10.52
   2   7   5   58.51    8.91
  -2  -7  -6  492.06   24.94
  -2  -7  -6  404.92   21.98
  -2  -7  -6  465.05   22.85
   2   7   6  484.13   23.21
  -2  -7  -7   16.92    3.63
  -2  -7  -7   17.60    3.23
  -2  -7  -7   18.71    3.44
   2   7   7   19.57    3.45
  -2  -7  -8  409.18   20.63
  -2  -7  -8  396.93   20.78
   2   7   8  417.60   20.74
  -2  -7  -9   50.55    4.97
  -2  -7  -9   50.54    4.66
   2  -8 -10  242.09   12.28
   2  -8 -10  205.92   11.83
   2  -8 -10  228.63   11.90
   2  -8  -9    0.62    1.53
   2  -8  -9    0.78    1.31
   2  -8  -9    0.86    1.28
   2  -8  -8   47.32    5.66
   2  -8  -8   52.34    5.67
   2  -8  -7   71.19    6.93
   2  -8  -6   76.10    7.05
  -2   8   6   81.61    6.82
  -2   8   5   17.77    4.81
  -2   8   5   25.53    6.84
  -2   8   5   13.39    2.41
   2  -8  -5   14.09    2.69
  -2   8   4   10.91    3.24
  -2   8   4   19.03    5.79
  -2   8   3  515.46   32.03
   2  -8  -3  490.02   30.81
  -2   8   2  590.65   34.88
   2  -8  -2  538.96   33.96
   2  -8  -1  689.10   38.28
   2  -8  -1  743.65   32.38
   2  -8   0 3040.60  125.16
   2  -8   0 2708.24  128.23
   2  -8   1  233.09   16.69
   2  -8   1  222.97   14.95
   2   8   2 1350.40   58.67
   2  -8   2 1239.72   57.76
   2   8   2 1356.60   59.06
   2   8   3  504.42   29.93
  -2  -8  -3  571.21   31.04
   2   8   3  596.33   31.70
   2   8   4 1788.05   79.79
   2   8   4 1854.82   79.52
   2   8   4 1681.48   69.23
  -2   8  -4 1641.40   68.42
  -2  -8  -4 1606.51   69.57
   2   8   5   50.59    5.18
  -2   8  -5   46.93    4.86
   2   8   5   56.56    5.48
  -2  -8  -5   56.82    6.09
   2   8   5   58.49    9.81
  -2  -8  -5   52.94    5.22
  -2  -8  -6  585.84   27.88
  -2  -8  -6  502.56   25.72
   2   8   6  555.02   26.46
  -2  -8  -7  108.85    8.70
   2   8   7  108.57    8.30
  -2  -8  -7  101.09    7.96
  -2  -8  -7   96.98    7.67
   2   8   8  522.25   23.89
  -2  -8  -8  470.76   23.33
  -2  -8  -9    1.92    1.12
  -2  -8  -9    1.14    1.08
   2  -9 -10  321.29   15.16
   2  -9 -10  320.88   15.36
   2  -9 -10  305.80   15.26
   2  -9  -9   56.42    5.42
   2  -9  -9   68.26    5.95
   2  -9  -9   54.71    5.21
   2  -9  -8   10.29    2.62
   2  -9  -8   10.43    2.65
   2  -9  -7  231.81   14.12
   2  -9  -6  107.76    8.56
  -2   9   6  113.64    8.54
  -2   9   5  103.45    7.64
  -2   9   5  116.47   13.02
  -2   9   4   22.89    5.01
  -2   9   4   36.85    7.86
   2  -9  -3    1.74    2.07
   2  -9  -2  327.32   25.05
   2  -9  -1  137.14   10.68
   2  -9  -1  173.60   16.32
   2  -9   0 1020.44   46.54
   2   9   0 1132.37   50.01
   2  -9   1   11.52    3.03
   2  -9   1    3.26    2.58
   2   9   1    6.62    2.72
   2  -9   2   62.85    7.52
   2   9   2   67.50    8.24
   2   9   3   62.50    8.72
   2  -9   3   62.43    7.88
  -2  -9  -3   89.98   10.19
   2   9   3   78.81    9.72
   2   9   4 1551.59   73.73
  -2   9  -4 1538.08   63.60
   2   9   4 1609.82   73.12
   2   9   4 1490.52   63.73
  -2   9  -5  297.86   16.12
  -2  -9  -5  284.43   16.43
   2   9   5  317.10   16.44
   2   9   5  279.60   15.66
  -2  -9  -6 1744.21   69.30
  -2  -9  -6 1522.58   67.47
   2   9   6 1631.82   68.10
  -2  -9  -7   41.86    4.98
  -2  -9  -7   40.47    4.64
   2   9   7   50.15    5.18
  -2  -9  -8    0.45    1.14
   2   9   8    0.97    1.20
  -2  -9  -9  101.47    6.48
  -2  -9  -9  118.91    7.37
   2 -10  -9    1.86    1.36
   2 -10  -9    1.15    1.23
   2 -10  -9    3.00    1.60
  -2  10   9    3.41    1.48
   2 -10  -8    7.93    2.33
   2 -10  -8    4.92    1.98
  -2  10   8    3.70    1.77
   2 -10  -7    2.57    1.75
  -2  10   7    3.26    2.02
   2 -10  -6  128.56    9.47
  -2  10   6  143.87    9.92
  -2  10   5  284.50   15.42
  -2  10   4  814.01   35.90
   2 -10  -4  830.18   35.86
  -2  10   4  793.65   35.46
  -2  10   4  847.77   43.28
   2 -10  -3   35.91    7.66
   2 -10  -2  432.68   30.53
   2 -10  -1   39.88    8.24
   2 -10   0    1.09    1.30
   2 -10   0    3.39    3.18
   2  10   0    2.00    1.77
   2 -10   1   23.42    4.79
   2 -10   1   21.80    5.62
   2  10   1   22.83    4.84
   2 -10   2 3056.72  143.00
   2  10   2 4004.64  146.51
  -2 -10  -3   59.91    8.64
   2 -10   3   55.29    7.93
   2  10   3   73.40    9.52
  -2  10  -3   56.48    5.25
   2  10   3   65.03    5.47
   2  10   3   71.07    5.66
   2  10   4   16.09    2.82
   2  10   4    9.47    3.85
   2  10   4   10.91    2.31
  -2  10  -4    9.29    2.29
  -2 -10  -5   20.97    3.44
   2  10   5   22.86    3.52
   2  10   5   19.10    3.12
  -2 -10  -6    6.40    2.14
   2  10   6    9.11    2.37
   2  10   6    9.89    2.44
   2  10   7   13.33    2.62
  -2 -10  -7   10.07    2.26
  -2 -10  -7   13.39    2.75
   2  10   8 1047.46   44.29
  -2 -10  -9   64.97    4.84
   2 -11  -9  401.66   19.01
   2 -11  -9  415.58   19.36
  -2  11   9  407.76   19.19
   2 -11  -8  126.87    8.54
  -2  11   8  125.62    8.83
   2 -11  -8  123.97    8.67
  -2  11   7   84.46    7.33
   2 -11  -7   67.79    6.29
  -2  11   6  137.80    9.89
  -2  11   5  160.88   10.71
  -2  11   5  163.99   10.64
   2 -11  -4    2.30    1.49
  -2  11   4    2.20    1.46
  -2  11   4    2.08    1.31
  -2  11   3  505.31   22.36
   2 -11  -3  511.12   22.94
  -2  11   3  502.22   22.06
   2  11  -3  388.10   21.95
   2 -11  -3  638.22   36.07
  -2 -11   3  288.88   27.61
   2 -11  -2  219.21   20.82
   2 -11  -1   17.94    6.19
   2 -11   0  661.60   42.45
   2 -11   0  738.09   39.16
   2  11   1    3.38    2.28
   2 -11   1    4.80    2.71
   2  11   2   26.56    3.23
  -2  11  -2   16.59    2.77
   2  11   2   24.15    3.06
   2  11   2   24.51    5.33
   2 -11   2   12.86    3.97
   2  11   3   38.10    4.24
  -2 -11  -3   41.38    7.24
   2  11   3   42.90    4.41
  -2  11  -3   46.30    4.84
   2  11   4 1223.74   52.18
   2  11   5   34.95    4.32
  -2 -11  -5   49.08    5.09
   2  11   5   46.91    4.68
   2  11   6 1072.90   45.32
  -2 -11  -6 1074.10   45.48
   2  11   6  983.06   44.72
  -2 -11  -7  438.45   20.92
   2  11   7  421.63   20.71
   2  11   8   17.40    2.52
   2 -12  -9   10.62    1.90
  -2  12   9   11.71    1.96
  -2  12   8   49.06    4.82
  -2  12   8   43.15    4.57
  -2  12   7   13.58    3.03
  -2  12   6    1.34    1.69
  -2  12   5  293.88   16.41
  -2  12   5  299.13   16.45
  -2  12   4   51.19    5.41
  -2  12   4   66.03    5.84
  -2  12   3   47.75    4.80
   2 -12  -3   56.02   10.17
   2 -12  -3   47.36    5.06
   2  12  -3   42.43    4.98
   2  12  -2  336.82   18.03
   2  12  -2  337.36   17.52
  -2  12   2  379.57   17.90
   2 -12  -2  365.00   18.98
   2 -12  -2  372.32   28.46
   2  12  -1   26.15    3.57
   2  12  -1   17.47    2.89
   2 -12  -1   20.34    6.90
   2  12   0 2425.84   91.26
   2 -12   0 1805.24  101.79
   2 -12   0 1993.06   98.61
   2  12   0 2265.77   90.59
   2  12   1  352.87   23.49
   2  12   1  327.54   16.71
  -2  12  -1  310.94   17.67
   2  12   1  401.67   17.88
   2 -12   1  275.28   22.63
   2  12   1  367.26   17.53
   2  12   2  129.90    8.53
  -2  12  -2  138.51    9.46
   2  12   3   17.56    2.84
   2  12   3   19.90    3.09
  -2  12  -3   17.49    3.14
   2  12   4 1105.29   46.05
  -2 -12  -4 1024.96   45.50
  -2  12  -4 1064.39   46.73
   2  12   5   67.15    5.81
  -2 -12  -5   85.29    6.68
   2  12   5   80.50    6.47
  -2  12  -5   68.31    6.58
  -2 -12  -6  686.59   29.45
   2  12   6  631.46   28.95
   2  12   6  594.19   28.42
   2  12   7   11.09    2.15
  -2 -12  -7   12.17    2.35
   2  12   7   11.16    2.07
   2  12   8  409.30   18.48
  -2  13   8  257.91   13.36
  -2  13   8  252.78   13.28
  -2  13   7  466.12   22.86
  -2  13   6   46.54    5.25
   2 -13  -6   61.50    5.60
  -2  13   5  195.28   11.97
  -2  13   5  180.43   11.77
  -2  13   4  171.41   11.09
  -2  13   4  174.82   11.17
  -2  13   3    4.12    1.82
   2 -13  -3    0.83    1.65
   2  13  -3    1.25    1.71
  -2  13   2  215.27   12.63
   2 -13  -2  234.22   13.58
   2  13  -2  213.90   12.43
   2  13  -2  213.20   12.88
   2  13  -1  291.55   15.46
   2  13  -1  285.32   15.05
   2  13   0  670.05   30.78
   2  13   0  702.94   31.18
   2  13   1   33.32    3.87
   2  13   1   29.17    3.47
   2  13   1   33.10    3.90
  -2  13  -1   36.30    4.68
   2  13   2    0.48    1.03
  -2  13  -2    0.70    1.51
   2  13   3  106.44    7.63
  -2  13  -3  104.17    8.51
  -2 -13  -4 1402.93   58.49
   2  13   4 1366.15   58.65
  -2  13  -4 1430.67   60.37
  -2 -13  -5  193.67   11.29
   2  13   5  194.61   11.31
  -2  13  -5  168.55   11.82
  -2 -13  -6  373.52   17.99
   2  13   6  354.84   17.66
   2  13   6  346.29   17.25
  -2 -13  -7   39.16    3.76
   2  13   7   35.40    3.51
   2  13   7   31.13    3.24
  -2  14   8    9.95    1.86
  -2  14   8    9.38    1.77
  -2  14   7  149.59    9.35
   2 -14  -7  148.99    9.00
  -2  14   7  142.43    8.97
  -2  14   6   73.14    6.13
   2 -14  -6   69.87    6.00
  -2  14   6   71.23    6.43
  -2  14   5   40.09    4.54
  -2  14   5   27.04    3.96
  -2  14   4  322.13   17.39
   2  14  -4  330.89   17.54
  -2  14   4  318.10   17.38
   2 -14  -3  607.21   28.19
   2  14  -3  627.89   29.12
  -2  14   3  596.91   28.75
   2  14  -2  103.91    7.54
   2  14  -2  106.74    7.97
  -2  14   2   93.65    7.54
   2  14  -1  405.77   20.06
   2  14  -1  392.63   19.71
   2  14   0   84.51    6.70
   2  14   0   86.51    6.68
  -2  14  -1   67.19    7.16
   2  14   1   89.07    6.58
  -2  14  -2 1709.35   72.95
  -2  14  -3  404.18   22.46
   2  14   3  445.61   20.94
  -2  14  -4  128.91   10.15
  -2 -14  -4  140.53    8.95
   2  14   4  146.31    9.19
  -2  14  -5  154.92   11.19
  -2 -14  -5  173.41   10.22
   2  14   5  177.35   10.30
   2  14   6   16.94    2.51
  -2 -14  -6   13.90    2.43
   2  14   7   80.95    5.34
  -2 -14  -7   94.04    5.85
   2  14   7   86.57    5.56
  -2  15   7    1.41    1.00
  -2  15   7    1.39    1.11
   2 -15  -7    0.54    1.11
  -2  15   6  153.31    9.61
   2 -15  -6  156.14    9.37
  -2  15   6  144.32    9.17
  -2  15   5   57.14    5.42
  -2  15   5   47.32    4.97
   2  15  -4   20.03    3.29
  -2  15   4   28.35    3.91
   2  15  -3  241.38   14.16
  -2  15   3  259.71   14.51
   2  15  -2  663.53   29.16
   2  15  -2  619.11   28.44
  -2  15   2  579.74   28.66
   2  15  -1  161.86   10.12
  -2  15   1  147.00   10.46
   2  15  -1  172.53   10.43
   2  15   0  288.17   15.59
   2  15   0  315.63   16.01
   2  15   1   -0.24    1.09
  -2  15  -1    3.28    2.28
  -2  15  -2   96.45    8.59
  -2  15  -3    7.71    2.66
  -2  15  -4  347.62   20.06
   2  15   4  381.48   18.44
  -2 -15  -4  380.29   18.19
  -2  15  -5    9.08    2.58
   2  15   5    7.38    1.80
  -2 -15  -5   10.27    2.02
   2  15   6 1226.83   53.30
  -2 -15  -6 1397.78   53.79
  -2 -15  -7  112.21    6.27
  -2  16   7    6.41    1.38
   2 -16  -7    4.53    1.31
  -2  16   6   25.89    3.15
   2 -16  -6   33.52    3.46
  -2  16   5  702.45   30.68
  -2  16   5  663.76   30.37
   2  16  -4   46.11    4.59
  -2  16   4   40.23    4.49
   2  16  -3  111.67    8.21
   2  16  -3  121.84    7.90
  -2  16   3  118.22    8.41
   2  16  -2    4.99    1.66
   2  16  -2    4.29    1.75
  -2  16   1  350.87   18.45
   2  16  -1  329.50   17.23
   2  16  -1  342.15   17.35
  -2  16   0  182.90   12.35
   2  16   0  205.82   11.65
   2  16   0  217.03   11.88
   2  16   1  264.73   14.03
  -2  16  -1  249.10   15.06
  -2  16  -1  289.14   16.39
  -2  16  -2  597.58   29.36
  -2  16  -2  669.68   31.12
  -2  16  -3  413.30   22.08
  -2  16  -4  158.39   11.34
   2  16   4  194.61   10.34
  -2 -16  -4  173.03    9.84
  -2  16  -5  164.08   10.55
   2  16   5  176.01    9.52
  -2 -16  -5  169.88    9.35
   2  16   6   70.61    4.73
  -2 -16  -6   74.14    4.83
  -2  17   6   82.51    5.45
   2 -17  -6   89.03    5.61
   2 -17  -5    9.36    1.95
   2  17  -4  126.56    7.95
  -2  17   4  130.29    8.32
   2  17  -3  191.59   10.97
   2  17  -3  175.82   10.29
  -2  17   3  204.67   11.35
   2  17  -2   83.92    6.56
   2  17  -2   92.92    6.59
   2  17  -1  131.09    8.56
  -2  17   1  138.65    9.34
   2  17  -1  131.22    8.55
   2  17   0  239.26   12.72
   2  17   0  225.97   12.57
  -2  17   0  237.88   13.85
  -2  17  -1    1.28    1.57
   2  17   1    1.49    1.11
  -2  17  -1    2.46    1.60
  -2  17  -2    1.98    1.76
  -2  17  -2    4.90    1.94
  -2  17  -3    0.95    1.60
  -2  17  -4 1099.13   45.12
  -2 -17  -4 1001.48   42.71
  -2  17  -5    4.58    1.52
   2  17   5    6.31    1.35
  -2 -17  -5    7.00    1.41
   2 -18  -5   42.22    3.56
   2  18  -4   16.36    2.27
   2  18  -3  381.19   17.64
   2  18  -3  359.98   17.11
   2  18  -2  112.79    7.27
   2  18  -2  109.67    7.14
   2  18  -1  644.68   28.61
  -2  18   1  691.94   29.58
   2  18  -1  621.56   28.57
   2  18   0  686.99   29.83
   2  18   0  660.55   29.81
  -2  18   0  705.60   31.04
  -2  18  -1   44.63    4.57
  -2  18  -1   39.39    4.35
   2  18   1   37.48    3.74
  -2  18  -2  206.82   11.97
  -2  18  -2  209.72   11.79
  -2  18  -3  368.12   18.17
  -2  18  -4  367.19   17.52
   2  19  -4    8.34    1.44
   2 -19  -4    9.25    1.57
   2  19  -3   12.46    1.91
   2  19  -2  233.85   11.59
   2  19  -2  227.95   11.58
  -2  19   1  329.94   15.28
   2  19  -1  309.55   14.93
   2  19  -1  294.08   14.61
  -2  19   0  124.40    7.78
   2  19   0  117.11    7.25
   2  19   0  124.17    7.22
  -2  19  -1   15.93    2.51
  -2  19  -2   30.61    3.22
  -2  19  -2   27.59    3.10
  -2  19  -3   26.78    2.94
   2  20  -3    1.02    0.74
   2  20  -2   81.57    5.04
   2  20  -2   85.08    5.10
   2  20  -1   28.78    2.74
   2  20  -1   30.00    2.75
   2  20   0    6.31    1.34
  -2  20   0    7.12    1.51
  -2  20  -1  191.39    9.75
  -2  20  -2 1144.35   46.37
   3   0 -11   -0.26    1.21
   3   0 -10  228.82   13.02
   3   0 -10  242.75   14.06
   3   0 -10  243.26   16.12
   3   0  -9    0.38    1.56
   3   0  -9    0.71    1.64
   3   0  -9    5.53    1.86
   3   0  -8   37.27    4.96
   3   0  -8   42.73    4.43
   3   0  -8   33.82    4.83
   3   0  -8   40.89    7.00
   3   0  -7   -1.09    2.34
   3   0  -7    1.07    1.05
   3   0  -7    0.59    1.27
   3   0  -6  143.31   11.74
   3   0  -5   -1.56    4.54
   3   0  -5   -0.54    1.28
   3   0  -5    0.38    0.91
   3   0  -4 4668.61  180.93
   3   0  -4 3987.54  167.89
   3   0  -4 4497.35  166.05
   3   0  -4 3802.47  166.60
   3   0  -3   -0.54    2.22
   3   0  -3    3.60    1.61
  -3   0   3    0.66    0.87
   3   0  -3    1.42    1.47
   3   0  -2  305.68   17.04
  -3   0   2  328.85   15.24
   3   0  -2  317.01   14.55
   3   0  -2  290.09   18.89
  -3   0   1    1.33    0.79
  -3   0   1    2.00    1.17
   3   0  -1    0.33    0.44
  -3   0   0  187.89    9.87
  -3   0  -1    0.89    1.06
  -3   0  -1    6.29    1.55
  -3   0  -2 6840.49  258.16
  -3   0  -2 6253.61  256.83
  -3   0  -2 6432.97  253.76
  -3   0  -3    0.67    1.78
  -3   0  -3    0.49    1.17
  -3   0  -4  109.09   13.40
  -3   0  -5    2.50    2.97
  -3   0  -5    2.03    1.80
  -3   0  -6  208.49   14.58
  -3   0  -6  226.20   14.00
  -3   0  -7   -2.76    2.54
  -3   0  -7    0.43    1.78
  -3   0  -8   33.67    6.12
  -3   0  -8   47.96    6.25
  -3   0  -9    0.43    1.78
  -3   0 -10  122.53    8.42
   3  -1 -11  179.89   10.87
   3   1 -10    3.37    2.17
   3  -1 -10    3.95    1.98
   3  -1 -10    3.54    1.60
   3  -1 -10    1.78    1.91
   3   1 -10    8.75    3.12
   3   1  -9  283.58   17.54
   3  -1  -9  276.80   16.78
   3   1  -9  304.88   17.47
   3   1  -9  328.85   16.50
   3  -1  -9  301.30   16.03
   3   1  -8  761.70   38.20
   3  -1  -8  808.31   37.61
   3   1  -8  746.47   42.16
   3  -1  -8  842.68   41.02
   3  -1  -8  857.98   37.70
   3   1  -8  806.02   38.17
   3   1  -8  871.72   36.67
   3  -1  -8  831.42   36.25
   3   1  -7  197.36   16.36
   3  -1  -7  227.26   15.70
   3   1  -7  287.00   13.46
   3   1  -7  232.11   14.10
   3  -1  -7  233.27   13.50
   3  -1  -7  255.83   12.93
   3  -1  -7  212.65   16.78
   3  -1  -6  937.42   62.34
   3  -1  -6  851.42   41.56
   3   1  -5  674.21   31.02
   3  -1  -5  584.05   29.80
   3   1  -5  557.34   32.09
   3  -1  -5  595.38   31.68
   3  -1  -4   18.56    5.71
   3  -1  -4   24.72    4.09
   3   1  -4   16.82    3.71
   3  -1  -4   18.80    3.06
   3   1  -4   21.34    3.28
  -3   1   4   18.77    3.36
   3   1  -4   19.66    3.81
   3   1  -3   19.74    5.04
   3  -1  -3   24.13    4.59
   3  -1  -3   22.10    3.44
   3   1  -3   25.80    3.04
   3   1  -3   20.78    3.70
   3  -1  -3   22.85    2.82
  -3   1   3   16.64    2.78
   3   1  -3   18.91    3.97
   3  -1  -3   14.50    3.01
   3  -1  -2 8139.93  329.74
  -3   1   2 8514.71  327.92
   3  -1  -2 7809.35  331.85
   3   1  -2 7952.17  333.00
   3  -1  -1    4.89    2.28
  -3  -1   1    5.47    1.34
   3   1  -1    8.23    2.47
  -3  -1   1   11.60    1.94
   3  -1  -1    5.19    0.90
   3  -1  -1    6.35    1.60
  -3   1   1    3.15    1.50
   3   1  -1    5.19    4.16
  -3  -1   0 2566.47  101.50
  -3   1   0 2513.31  100.88
  -3   1   0 2735.24  103.67
  -3  -1   0 2447.36  101.76
  -3  -1  -1    5.38    2.02
  -3   1  -1    3.52    1.58
  -3   1  -1    3.84    1.34
  -3  -1  -1    6.40    1.65
  -3   1  -2  135.70   10.32
  -3  -1  -2  152.02   11.32
  -3   1  -2  153.24   11.40
  -3  -1  -2  148.23   11.64
  -3   1  -2  143.11    8.69
  -3  -1  -2  135.24    8.92
  -3  -1  -3   82.84    8.80
  -3   1  -3   70.10    8.88
  -3  -1  -3   96.80   10.51
  -3   1  -3   79.84    8.09
  -3  -1  -4   86.02   11.74
  -3   1  -4   80.16   11.41
  -3   1  -5  148.02   17.96
  -3  -1  -5  141.37   13.39
  -3  -1  -5  155.75   17.63
  -3   1  -5  115.93   11.78
  -3   1  -6  231.79   15.67
  -3  -1  -6  243.48   15.62
  -3  -1  -6  267.24   15.90
  -3   1  -6  253.69   15.62
  -3  -1  -6  240.81   14.66
  -3   1  -7   89.43    9.37
  -3  -1  -7  101.86    9.78
  -3   1  -7   94.35    9.26
  -3  -1  -7   97.52    8.48
  -3  -1  -8  118.81   11.53
  -3  -1  -8  126.53   10.07
  -3   1  -8  115.52   11.00
  -3  -1  -9   78.11    8.79
  -3  -1  -9   99.57    8.43
  -3  -1 -10   31.54    3.63
   3  -2 -11    5.63    1.81
   3  -2 -10  109.88    7.80
   3  -2 -10  107.46    8.07
   3   2 -10   99.92    8.54
   3   2  -9   -0.45    1.76
   3  -2  -9    0.68    1.57
   3   2  -9    0.28    1.31
   3  -2  -9    2.43    1.47
   3   2  -9   -0.41    1.90
   3   2  -8   60.71    5.52
   3   2  -8   52.55    6.46
   3  -2  -8   63.82    5.46
   3   2  -8   44.54    6.16
   3  -2  -8   58.16    5.82
   3  -2  -8   49.99    6.56
   3   2  -7    9.72    2.06
   3   2  -7    9.04    2.57
   3  -2  -7   12.59    3.26
   3  -2  -7   11.67    3.53
   3  -2  -7    6.27    6.10
   3  -2  -6 1249.48   58.93
   3  -2  -6 1630.71   82.42
   3  -2  -5  297.76   17.27
  -3   2   5  283.08   18.59
   3   2  -5  282.90   19.92
   3  -2  -5  302.55   18.58
   3   2  -4 1022.47   48.59
   3  -2  -4 1105.71   46.93
  -3   2   4  961.69   46.35
   3   2  -4 1005.25   48.42
   3  -2  -4 1173.51   53.95
   3   2  -3  182.74   13.14
   3  -2  -3  219.33   12.54
  -3   2   3  198.66   12.22
   3   2  -3  194.85   14.61
   3  -2  -3  222.93   14.58
  -3   2   2 7665.62  298.78
   3  -2  -2 8280.41  300.74
   3  -2  -2 7266.58  302.37
   3   2  -2 7124.09  303.36
   3  -2  -2 7591.03  300.39
  -3   2   1  110.85    8.13
   3  -2  -1  137.36    6.88
   3  -2  -1  121.75    7.78
   3   2  -1  145.19   12.35
   3   2  -1   93.19    7.99
   3  -2  -1  115.96    8.64
  -3  -2   1  135.63    7.60
  -3   2   0 3044.76  120.23
   3  -2   0 3089.45  117.11
  -3  -2   0 2965.55  117.94
  -3  -2   0 2746.88  118.25
   3  -2   1  472.88   20.72
  -3   2  -1  499.56   24.09
  -3  -2  -1  454.06   23.14
  -3  -2  -1  413.30   22.02
   3  -2   2  437.28   18.80
  -3  -2  -2  336.39   21.21
  -3   2  -2  385.87   20.56
  -3   2  -2  374.61   21.70
  -3  -2  -2  423.98   23.32
  -3  -2  -2  350.50   19.56
  -3  -2  -3  679.08   36.88
  -3   2  -3  652.87   32.63
  -3  -2  -3  655.17   34.59
  -3   2  -3  657.59   35.54
  -3  -2  -4 1783.00   81.28
  -3   2  -4 1575.62   80.16
  -3   2  -5  153.63   18.92
  -3   2  -5  140.81   13.02
  -3  -2  -5  171.62   15.48
  -3  -2  -6  231.28   14.26
  -3   2  -6  210.15   14.77
  -3  -2  -6  219.89   13.45
  -3  -2  -6  233.25   14.44
  -3   2  -7    8.72    3.18
  -3  -2  -7    2.95    1.92
  -3  -2  -7    3.35    2.35
  -3  -2  -8  233.94   15.01
  -3   2  -8  258.89   18.30
  -3  -2  -8  268.43   17.42
  -3   2  -9   32.87    6.29
  -3  -2  -9   21.65    3.68
  -3  -2  -9   22.01    4.31
   3   2  10   82.14    5.76
   3  -3 -11   31.38    3.65
   3  -3 -10  278.21   14.95
   3  -3 -10  311.27   17.00
   3   3 -10  267.48   16.43
   3  -3 -10  287.96   15.42
   3  -3  -9   46.19    5.20
   3   3  -9   39.66    6.14
   3  -3  -9   49.51    4.87
   3   3  -9   34.79    5.50
   3  -3  -8  110.76    9.40
   3  -3  -8  113.20    8.43
   3   3  -8   86.59    9.22
   3   3  -8   89.94    9.13
   3   3  -8  116.87    8.19
   3  -3  -8  106.96    7.56
   3   3  -7  188.03   10.41
   3   3  -7  147.35   11.49
   3  -3  -7  176.29   23.11
   3  -3  -7  152.70   11.16
   3  -3  -7  166.71   13.63
   3  -3  -7  138.96   13.00
  -3   3   6 2530.68  110.80
   3  -3  -6 2388.23  105.90
   3  -3  -5  261.49   22.28
  -3   3   5  220.11   16.26
   3  -3  -5  223.75   14.22
   3   3  -5  232.07   17.84
   3  -3  -5  214.79   14.92
   3  -3  -4  236.20   17.43
   3  -3  -4  219.70   13.62
  -3   3   4  190.52   13.90
   3   3  -4  229.22   16.11
   3   3  -4  208.81   15.81
   3  -3  -3  473.34   24.87
  -3   3   3  405.04   22.79
   3  -3  -3  477.95   22.50
   3   3  -3  473.65   24.98
   3   3  -3  459.21   26.79
   3  -3  -2  377.32   20.03
  -3   3   2  328.22   18.46
   3  -3  -2  375.76   20.54
  -3  -3   1  218.40   12.30
   3   3  -1  192.93   12.72
   3  -3  -1  214.97   12.82
  -3   3   1  206.76   13.02
   3  -3  -1  253.38   11.20
   3  -3  -1  216.78   12.77
  -3  -3   0 2748.46  117.95
   3  -3   0 3084.03  115.57
  -3   3   0 2777.80  118.46
   3  -3   0 2935.32  117.38
  -3  -3  -1   95.99    8.35
   3  -3   1  104.77    6.67
  -3  -3  -1  113.61    8.95
  -3  -3  -2  318.40   19.26
  -3  -3  -2  338.94   21.20
  -3   3  -2  332.29   18.37
  -3  -3  -2  334.18   20.33
  -3   3  -2  398.52   21.50
   3   3   2  363.87   21.29
   3  -3   2  343.43   16.85
  -3   3  -3   15.11    4.08
  -3  -3  -3    8.02    3.59
   3   3   3    6.63    2.97
  -3  -3  -4  541.31   32.85
  -3   3  -4  436.80   31.23
  -3  -3  -5  113.79   12.56
  -3   3  -5   79.65    9.38
  -3   3  -6    2.01    2.15
  -3  -3  -6    1.57    1.44
  -3  -3  -6    0.35    1.45
  -3  -3  -7  154.38   10.51
  -3   3  -7  120.61   12.14
  -3  -3  -7  149.09   11.24
  -3  -3  -8  128.64    9.57
  -3   3  -8  147.97   13.56
  -3  -3  -8  125.91   10.60
  -3   3  -9  109.46   11.67
  -3  -3  -9   99.32    7.63
  -3  -3  -9  100.74    8.41
   3  -4 -11   13.84    2.25
   3  -4 -11   13.13    2.33
   3  -4 -10  182.10   10.99
   3  -4 -10  207.32   12.57
   3   4  -9   24.55    4.90
   3  -4  -9   21.32    3.28
   3  -4  -9   29.11    4.76
   3   4  -9   19.04    4.42
   3  -4  -8   20.30    3.88
   3   4  -8   16.59    4.38
   3   4  -8   12.99    3.71
   3  -4  -7   12.07    2.84
   3   4  -7   16.91    2.83
   3  -4  -7   23.91    8.28
   3  -4  -7   12.18    3.61
   3   4  -7   12.70    3.54
   3  -4  -7   13.08    3.85
   3  -4  -6  622.35   33.83
  -3   4   6  683.97   38.93
  -3   4   5  153.73   13.68
   3  -4  -5  145.76   15.72
   3   4  -4 3724.01  149.75
  -3   4   4 3439.58  147.78
   3  -4  -4 3667.58  150.48
   3   4  -3  419.21   25.05
  -3   4   3  368.60   21.28
   3   4  -3  375.15   22.36
   3  -4  -3  437.06   25.23
   3  -4  -3  368.97   21.78
   3   4  -2  231.22   16.39
  -3   4   2  204.09   13.63
   3  -4  -2  215.00   14.93
   3  -4  -2  210.65   13.98
  -3  -4   1  946.58   44.46
   3   4  -1 1165.32   45.71
   3  -4  -1 1088.97   42.53
  -3   4   1  868.08   45.07
   3  -4  -1  915.22   44.97
   3   4  -1 1219.18   48.32
  -3  -4   0   22.75    3.90
  -3   4   0   17.07    3.41
   3  -4   0   31.29    3.03
   3  -4   0   25.25    3.70
   3   4   0   23.65    4.15
  -3  -4  -1 1691.97   75.48
   3  -4   1 1799.23   71.76
  -3  -4  -2 3405.11  153.02
   3   4   2 4112.12  154.53
   3  -4   2 3724.30  148.33
  -3   4  -2 3684.95  149.84
  -3  -4  -2 3626.20  153.93
  -3   4  -2 4005.46  154.78
   3   4   3  144.80   13.10
  -3  -4  -3  137.41   13.37
  -3   4  -3  133.01   12.73
   3   4   4   20.29    5.45
  -3  -4  -4   26.48    6.30
  -3  -4  -5  405.74   24.57
  -3  -4  -5  525.11   24.06
  -3  -4  -5  560.66   24.55
  -3   4  -5  424.89   25.33
   3   4   5  540.81   24.66
  -3  -4  -6   47.43    6.17
  -3   4  -6   49.07    6.91
  -3  -4  -6   62.55    6.05
  -3   4  -7  115.00   11.94
  -3  -4  -7  140.19   10.50
  -3  -4  -7  150.12   10.69
  -3   4  -8    2.10    3.23
  -3  -4  -8    3.51    2.03
  -3  -4  -9    5.48    1.96
   3  -5 -11   41.06    3.81
   3  -5 -10   54.00    5.07
   3  -5 -10   57.34    5.77
   3  -5 -10   65.97    5.83
   3   5  -9   66.19    7.96
   3  -5  -9   83.65    6.57
   3  -5  -9   85.31    7.85
   3  -5  -9   86.92    7.94
   3   5  -8 1828.31   92.34
   3  -5  -8 2157.21   90.13
   3   5  -7    6.71    3.03
   3  -5  -7   11.44    3.37
   3  -5  -7    8.28    2.51
  -3   5   6   17.68    4.93
  -3   5   6   25.27    6.25
   3  -5  -6   19.06    4.12
   3  -5  -6   19.69    3.08
   3  -5  -6   17.65    3.31
  -3   5   5   -0.76    1.56
   3  -5  -5   -0.92    2.45
  -3   5   4   22.48    4.75
   3  -5  -4   18.67    4.66
   3   5  -3   91.17   10.45
  -3   5   3   89.79    8.92
   3  -5  -3   97.85   10.78
   3  -5  -3   82.22    8.56
   3   5  -2 4467.80  176.63
   3  -5  -2 4249.50  173.27
  -3   5   2 4313.22  174.53
   3  -5  -2 4156.17  175.48
   3  -5  -1  160.77   11.47
  -3   5   1  137.01   11.09
   3  -5  -1  126.24   10.67
   3  -5  -1  147.09    8.47
   3   5  -1  155.50   10.48
   3  -5   0 3131.33  122.69
   3  -5   0 3126.83  119.86
  -3  -5  -1    3.12    1.84
   3  -5   1    2.28    1.81
   3  -5   1    1.20    0.86
  -3  -5  -2  122.11   10.99
   3   5   2  103.95    9.88
   3  -5   2  102.26    7.59
  -3   5  -2   96.98   10.31
   3   5   3   13.78    3.95
  -3  -5  -3   19.73    5.10
  -3   5  -3   13.81    4.36
   3   5   4    7.38    3.24
  -3  -5  -4    3.72    2.94
  -3  -5  -5   25.69    4.65
  -3  -5  -5   35.81    4.02
  -3  -5  -5   35.12    4.13
   3   5   5   36.36    4.34
  -3  -5  -6  372.65   18.10
  -3  -5  -6  345.80   18.00
   3   5   6  345.74   18.10
  -3  -5  -7   39.65    5.07
  -3  -5  -7   37.67    4.89
  -3  -5  -8  272.43   15.76
  -3  -5  -9   -0.26    1.31
   3  -6 -10   88.80    6.66
   3  -6 -10   96.56    7.29
   3  -6 -10   96.89    7.41
   3  -6 -10   94.91    7.12
   3  -6  -9    4.39    1.77
   3  -6  -9    5.55    2.38
   3  -6  -9    4.33    2.20
   3  -6  -8    8.37    2.86
   3  -6  -8    6.15    2.28
   3   6  -8    6.93    3.30
   3  -6  -7   70.89    7.44
   3   6  -7   69.31    8.19
   3  -6  -6  482.38   24.01
  -3   6   6  527.00   33.98
  -3   6   6  457.26   30.66
   3  -6  -6  524.28   35.50
  -3   6   5  306.33   23.08
   3  -6  -5  315.13   23.93
  -3   6   4 2541.02  107.27
   3  -6  -4 2356.98  105.68
   3   6  -3  482.13   29.67
  -3   6   3  518.86   29.42
   3  -6  -3  542.20   31.19
   3  -6  -3  480.51   27.15
   3   6  -2  159.45   13.42
   3  -6  -2  151.27   12.09
   3  -6  -2  162.61   14.39
  -3   6   2  170.42   14.09
   3  -6  -1  960.03   46.67
   3   6  -1 1022.37   45.95
  -3   6   1  953.60   48.29
   3  -6  -1  924.40   47.59
   3  -6  -1 1117.96   43.58
   3   6   0  636.43   29.38
  -3   6   0  522.70   29.49
   3  -6   0  539.72   29.23
   3  -6   0  611.97   27.06
   3   6   1 1302.66   55.50
   3  -6   1 1232.14   54.90
   3  -6   1 1176.05   52.20
  -3  -6  -2 3365.26  126.76
   3  -6   2 2736.47  120.48
   3   6   2 3103.74  125.11
   3  -6   2 3118.49  124.06
  -3   6  -2 2837.61  126.64
   3   6   3  880.41   43.98
   3  -6   3  809.77   41.15
   3   6   4  452.47   30.57
  -3  -6  -4  570.07   34.22
  -3  -6  -5  172.37   12.79
  -3  -6  -5  167.94   10.38
  -3  -6  -5  169.18   10.73
   3   6   5  169.30   10.86
  -3  -6  -6    5.45    2.90
  -3  -6  -6    7.05    2.08
  -3  -6  -6    6.70    2.09
   3   6   6    6.19    2.31
  -3  -6  -7   90.37    7.56
  -3  -6  -7   93.71    7.87
   3   6   7  102.95    8.13
  -3  -6  -8    6.29    2.21
  -3  -6  -9   56.95    4.93
   3  -7 -10  264.78   13.68
   3  -7 -10  261.97   13.42
   3  -7  -9  148.81    9.72
   3  -7  -9  163.62   10.87
   3  -7  -9  163.62   11.08
   3  -7  -8   31.91    4.72
   3  -7  -7    2.75    2.15
  -3   7   6 1920.44   89.75
   3  -7  -6 1853.63   79.33
   3  -7  -5   60.70    9.92
  -3   7   5   80.08   11.28
   3  -7  -4  303.46   22.14
  -3   7   4  380.12   25.58
   3  -7  -4  382.79   25.03
   3  -7  -3    8.64    2.88
   3  -7  -3    3.28    2.94
  -3   7   3    6.97    3.33
  -3   7   2 1241.51   56.74
   3  -7  -2 1160.34   56.09
   3   7  -1   39.84    5.45
  -3   7   1   51.09    7.72
   3  -7  -1   40.87    6.83
   3  -7  -1   42.01    4.46
   3   7   0 3195.30  124.42
   3  -7   0 3001.15  122.07
   3  -7   0 2857.04  125.76
   3   7   1   13.56    3.29
   3  -7   1   11.84    2.71
   3   7   1   14.69    3.42
   3  -7   2  146.47   10.68
   3   7   2  152.46   12.46
   3  -7   2  123.99   11.37
  -3  -7  -2  143.05   12.39
   3   7   3   63.34    8.54
   3  -7   3   63.93    8.04
  -3  -7  -3   59.64    8.84
   3   7   4  840.15   44.21
  -3  -7  -4  779.01   35.43
   3   7   4  737.51   33.76
  -3  -7  -5    1.14    1.13
   3   7   5   -0.29    1.20
  -3  -7  -6   39.32    5.77
  -3  -7  -6   37.56    4.48
  -3  -7  -6   39.91    4.79
   3   7   6   46.97    5.14
  -3  -7  -7  234.17   14.42
  -3  -7  -7  202.78   12.56
  -3  -7  -7  206.15   12.91
   3   7   7  225.67   13.25
  -3  -7  -8   58.88    5.43
   3   7   8   59.86    5.48
  -3  -7  -9   13.37    2.21
   3  -8 -10  138.76    8.63
   3  -8 -10  151.94    9.17
   3  -8 -10  146.03    8.88
   3  -8  -9   21.25    3.19
   3  -8  -9   21.54    3.48
   3  -8  -9   25.33    3.94
   3  -8  -8   37.95    5.03
   3  -8  -7   64.86    6.83
   3  -8  -6 1255.80   54.86
  -3   8   6 1296.41   54.49
  -3   8   5   66.42    9.08
  -3   8   5   61.61   10.57
   3  -8  -5   56.42    9.46
   3  -8  -5   60.08    5.45
  -3   8   4 1719.98   86.09
   3  -8  -4 1921.41   85.78
  -3   8   3  588.46   36.43
   3  -8  -3  578.19   35.95
  -3   8   2 2700.80  117.84
   3  -8  -2 2464.67  115.22
   3  -8  -1  862.94   46.05
   3  -8  -1  873.09   39.29
   3  -8   0  710.05   34.07
   3  -8   0  655.92   37.32
   3   8   1  553.40   29.31
   3  -8   1  546.43   31.03
   3  -8   1  578.49   28.67
   3   8   2   30.04    5.60
  -3  -8  -2   30.31    5.70
   3  -8   2   29.88    5.66
   3  -8   2   23.99    4.46
  -3  -8  -3    6.62    3.28
   3   8   3    4.77    2.68
   3   8   3   10.08    3.74
   3  -8   3    5.57    2.49
   3   8   4 1524.67   69.89
  -3   8  -4 1371.85   58.35
   3   8   4 1499.99   59.25
   3   8   4 1512.33   70.06
  -3  -8  -4 1356.08   59.58
   3   8   4 1335.31   58.44
  -3   8  -5  278.49   15.75
  -3  -8  -5  327.79   17.94
  -3  -8  -5  302.94   16.24
   3   8   5  303.95   16.34
  -3  -8  -6   37.10    5.39
  -3  -8  -6   32.58    4.29
   3   8   6   47.51    5.08
  -3  -8  -7  282.14   15.77
  -3  -8  -7  330.67   17.58
   3   8   7  309.46   16.56
   3   8   8   68.03    5.51
  -3  -8  -8   54.12    4.92
  -3  -8  -9    8.92    1.70
   3  -9 -10    8.99    1.87
   3  -9 -10    5.28    1.68
   3  -9  -9   52.99    5.42
   3  -9  -9   54.26    5.53
   3  -9  -8  882.25   39.98
   3  -9  -7  276.54   16.49
  -3   9   7  283.37   16.49
   3  -9  -6  290.32   17.00
  -3   9   6  298.40   16.33
  -3   9   5  250.17   14.13
  -3   9   5  287.69   21.29
  -3   9   4  142.91   16.59
  -3   9   3  274.95   23.66
   3  -9  -3  269.73   23.11
   3  -9  -2 2002.72   95.28
   3  -9  -1   20.06    5.99
   3  -9   0 1454.70   73.56
   3  -9   0 1563.82   69.03
   3  -9   1   14.68    3.49
   3  -9   1   12.85    4.11
   3   9   1   16.41    3.85
   3  -9   2   73.68    9.53
   3  -9   2   61.31    7.69
  -3  -9  -2   92.80   10.04
   3   9   2   83.91    9.39
   3  -9   3   39.17    6.21
   3   9   3   39.94    7.13
  -3   9  -3   42.56    4.27
   3   9   3   46.45    7.72
   3   9   3   47.75    4.58
  -3  -9  -3   43.63    7.44
   3   9   4   51.02    5.01
  -3  -9  -4   43.18    4.97
  -3   9  -4   52.84    4.99
   3   9   4   45.32    4.60
  -3   9  -5  310.31   17.63
  -3  -9  -5  358.35   18.92
   3   9   5  359.43   18.23
   3   9   5  343.22   17.82
  -3  -9  -6  157.12   10.97
  -3  -9  -6  154.45   10.07
   3   9   6  143.26    9.95
  -3  -9  -7   21.40    3.48
   3   9   7   15.82    2.81
   3   9   8   25.23    3.18
   3 -10  -9   24.70    3.51
   3 -10  -9   29.27    3.81
  -3  10   9   29.23    3.66
   3 -10  -8   38.59    4.82
   3 -10  -8   40.56    4.88
   3 -10  -7    1.41    1.39
  -3  10   7    0.37    1.31
   3 -10  -6  210.29   13.34
  -3  10   6  211.66   13.00
  -3  10   5   58.58    5.65
  -3  10   5   52.92    5.27
   3 -10  -4 3733.59  142.18
  -3  10   4 3392.54  149.33
  -3  10   4 3459.15  141.59
   3 -10  -3   45.76    9.42
   3 -10  -2   -1.16    3.10
   3 -10  -1   91.71   13.03
   3 -10   0   26.44    4.80
   3 -10   0   19.02    5.47
   3  10   0   27.82    5.14
   3 -10   1    4.04    2.28
   3 -10   1    0.84    2.01
   3  10   1    2.80    2.00
  -3 -10  -2 4302.27  159.97
   3  10   2 3938.05  158.11
  -3 -10  -3  569.46   31.48
   3  10   3  507.64   23.21
  -3  10  -3  486.76   23.25
   3  10   3  547.34   31.35
   3  10   4  142.61    9.32
  -3  10  -4  151.12   10.01
  -3 -10  -4  152.49    9.92
   3  10   4  162.41   10.04
   3  10   5    2.75    1.50
   3  10   5    3.79    1.70
  -3 -10  -5    3.18    1.78
  -3 -10  -6  110.91    8.48
   3  10   6  109.89    8.05
  -3 -10  -7    7.18    2.14
   3  10   7    5.51    1.80
   3  10   8   22.03    2.79
   3 -11  -9  458.34   21.92
   3 -11  -9  478.07   22.26
  -3  11   9  498.71   22.31
   3 -11  -8  458.54   22.35
   3 -11  -8  456.19   22.45
  -3  11   7  101.29    8.26
   3 -11  -7   86.05    7.47
  -3  11   6  252.10   14.88
  -3  11   5  389.92   19.97
  -3  11   5  391.75   20.29
  -3  11   4   79.61    6.56
   3 -11  -4   76.73    6.59
  -3  11   4   76.83    6.30
  -3  11   3  219.68   12.53
   3 -11  -3  266.21   23.43
   3 -11  -3  247.06   14.08
   3  11  -3  209.00   12.68
  -3  11   2 1715.14   70.58
   3 -11  -2 1748.71   74.59
   3 -11  -2 1656.43   86.41
   3  11  -2 1735.94   71.20
   3 -11  -1  228.29   22.52
   3 -11   0 2014.10   97.73
   3 -11   0 1999.97   90.70
   3  11   0 2182.56   91.27
   3  11   1  113.86    7.34
   3  11   1   98.44   10.48
   3 -11   1   83.15   12.19
   3 -11   1   79.98    9.99
   3  11   1  111.96    7.38
  -3 -11  -2   91.52   10.77
   3  11   2   83.02    6.22
  -3  11  -2   96.88    6.91
   3  11   2   79.07    9.79
   3  11   3   75.34    6.14
  -3  11  -3   80.14    6.65
   3  11   4  124.10    8.58
  -3  11  -4  126.60    9.20
  -3 -11  -4  122.17    8.56
   3  11   5    0.52    1.06
   3  11   5    1.40    1.29
  -3 -11  -5    0.88    1.26
   3  11   6   26.77    3.59
  -3 -11  -6   28.25    3.90
   3  11   6   23.84    3.35
  -3 -11  -7  487.67   22.52
   3  11   7  472.86   22.25
   3  11   8   10.20    1.77
   3 -12  -9   33.15    3.29
   3 -12  -9   28.66    3.18
  -3  12   9   32.87    3.41
   3 -12  -8   57.43    5.27
   3 -12  -8   65.74    5.66
  -3  12   8   71.18    6.10
  -3  12   7    5.11    2.23
  -3  12   6  898.02   40.61
  -3  12   5  284.09   15.32
  -3  12   5  241.52   14.82
  -3  12   4  509.27   24.99
   3 -12  -4  548.23   25.26
  -3  12   4  498.64   24.65
  -3  12   3    8.59    2.14
   3 -12  -3   13.25    5.56
   3 -12  -3    8.52    2.80
   3  12  -3    9.60    2.38
   3  12  -2 1338.63   57.32
   3  12  -2 1305.43   56.78
  -3  12   2 1390.11   57.25
   3 -12  -2 1509.11   60.80
   3 -12  -2 1292.02   72.54
   3  12  -1   46.93    4.58
   3 -12  -1   45.00    6.92
   3 -12  -1   43.53    9.79
   3  12  -1   46.53    4.71
   3 -12   0 1448.57   82.56
   3 -12   0 1456.21   76.29
   3  12   0 1689.92   76.06
   3 -12   0 1524.10   73.00
   3  12   0 1795.80   69.50
   3  12   0 1792.36   69.44
   3  12   1   15.63    2.63
  -3  12  -1   12.59    2.65
   3  12   1   19.83    2.92
  -3  12  -2  120.91    8.49
   3  12   2  112.68    7.66
  -3  12  -2  108.17    8.22
   3  12   3   58.46    5.30
  -3 -12  -4 1107.19   46.94
   3  12   4 1108.48   47.07
  -3  12  -4 1063.32   47.76
   3  12   5    8.96    2.05
  -3 -12  -5   10.90    2.50
   3  12   5   12.91    2.52
  -3  12  -5   12.14    2.76
   3  12   6   68.38    5.68
  -3 -12  -6   70.71    5.96
   3  12   6   70.60    5.58
  -3 -12  -7    6.37    1.64
   3  12   7    6.62    1.58
   3  12   8   29.58    2.67
  -3  13   8  107.53    7.36
  -3  13   8  101.98    7.16
  -3  13   7  486.72   23.96
  -3  13   6 1107.67   46.52
  -3  13   6 1001.76   46.24
  -3  13   5   89.78    7.64
  -3  13   5   95.36    7.74
   3 -13  -4   54.60    5.58
  -3  13   4   40.60    4.94
  -3  13   4   53.96    5.39
   3 -13  -3   34.88    4.56
  -3  13   3   27.48    3.99
   3  13  -3   29.26    3.88
  -3  13   2  644.85   29.81
   3 -13  -2  668.85   31.77
   3  13  -2  633.99   29.19
   3  13  -2  652.06   29.63
   3 -13  -1    2.42    2.99
   3  13  -1    1.01    1.13
   3  13  -1    0.98    1.10
   3  13   0 1280.61   53.86
   3  13   0 1280.81   53.81
  -3  13  -1  181.27   12.21
   3  13   1  194.70   11.27
   3  13   1  204.03   11.40
  -3  13  -2   52.66    5.72
  -3  13  -3   12.23    2.92
   3  13   3   12.34    2.37
   3  13   4  372.95   18.23
  -3 -13  -4  349.32   17.82
  -3  13  -4  350.58   19.32
   3  13   5  574.93   25.49
  -3 -13  -5  537.78   25.32
  -3  13  -5  524.09   26.59
   3  13   6    5.46    1.46
  -3 -13  -6    6.93    1.83
  -3 -13  -7    0.66    0.90
   3  13   7    0.89    0.90
  -3  14   8    2.99    1.24
  -3  14   8    1.85    1.06
  -3  14   7   42.56    4.60
  -3  14   6  132.02    9.09
  -3  14   6  130.48    9.26
  -3  14   5    2.86    1.69
  -3  14   5    0.96    1.32
  -3  14   4 1782.83   75.90
  -3  14   4 1852.24   75.83
   3 -14  -3   65.14    6.19
  -3  14   3   69.13    6.30
   3  14  -3   58.12    5.53
  -3  14   2   90.37    7.43
   3 -14  -2  103.59    8.47
   3  14  -2   95.10    7.07
   3  14  -2  100.11    7.35
   3 -14  -1  223.33   14.66
   3  14  -1  225.17   12.24
   3  14  -1  189.36   11.63
   3  14   0   42.47    4.54
   3  14   0   46.63    4.61
  -3  14  -1 1003.39   48.33
   3  14   1 1132.11   46.68
   3  14   1 1109.10   46.44
  -3  14  -2  764.70   36.00
   3  14   3   55.77    5.06
  -3  14  -3   55.62    6.22
   3  14   4  102.35    7.23
  -3 -14  -4   95.85    6.93
  -3  14  -4  102.15    8.50
  -3 -14  -5  236.82   12.49
   3  14   5  226.57   12.41
  -3  14  -5  229.15   14.06
   3  14   6   88.37    5.99
  -3 -14  -6   90.79    6.16
   3  14   7  111.51    6.09
   3  14   7  100.51    5.78
  -3  15   7    9.27    2.05
  -3  15   7    9.06    1.86
  -3  15   6   32.27    3.80
  -3  15   6   30.66    3.86
   3 -15  -6   32.27    3.70
  -3  15   5   91.11    7.26
  -3  15   5   93.04    7.39
  -3  15   4  128.64    9.24
   3  15  -4  128.93    8.51
   3 -15  -3   19.18    3.30
  -3  15   3   18.92    3.27
   3  15  -3   13.11    2.56
   3 -15  -2 1439.17   60.41
   3  15  -2 1396.37   59.25
   3  15  -2 1426.08   59.14
   3  15  -1   19.30    3.04
   3  15  -1   18.17    2.89
   3  15   0  784.81   34.89
   3  15   0  796.86   34.82
  -3  15  -1   54.33    6.40
   3  15   1   52.51    4.93
   3  15   1   54.73    4.95
  -3  15  -2   11.86    3.07
  -3  15  -3   26.30    4.49
   3  15   3   27.62    3.40
   3  15   4   12.44    2.28
  -3  15  -4   14.08    3.33
  -3 -15  -4   13.85    2.33
  -3  15  -5  105.41    8.37
   3  15   5  112.11    7.06
  -3 -15  -5  109.39    6.95
   3  15   6  254.99   12.61
  -3 -15  -6  274.38   12.80
  -3  16   7    1.57    0.97
  -3  16   6  163.65    9.54
  -3  16   6  171.50    9.78
   3 -16  -6  167.45    9.44
  -3  16   5  258.46   14.24
  -3  16   5  281.12   14.51
  -3  16   4  860.05   36.39
   3  16  -4  774.34   34.88
  -3  16   3  282.23   15.70
   3 -16  -3  286.83   15.20
   3  16  -3  299.90   14.79
   3  16  -3  285.61   14.98
   3  16  -2  158.14    9.55
   3  16  -2  155.80    9.65
   3  16  -1  268.58   13.97
  -3  16   1  235.13   14.65
   3  16  -1  271.99   13.97
   3  16   0  240.98   12.78
   3  16   0  225.43   12.60
   3  16   1  205.92   11.59
  -3  16  -1  204.50   13.67
   3  16   1  216.85   11.87
  -3  16  -2  306.64   17.83
  -3  16  -3  982.97   44.52
  -3  16  -4  203.73   13.04
   3  16   4  214.97   11.24
  -3  16  -5   27.12    3.62
   3  16   5   25.37    2.72
  -3 -16  -5   20.94    2.49
   3  16   6    3.82    0.98
   3 -17  -6  516.33   22.05
  -3  17   6  489.44   22.08
  -3  17   5   67.59    5.24
   3  17  -4  334.41   16.59
  -3  17   4  379.96   17.81
   3  17  -3    1.86    1.23
   3  17  -3    0.76    0.98
  -3  17   3    1.50    1.33
   3  17  -2  326.86   15.63
   3  17  -2  292.86   15.41
   3  17  -1    3.25    1.51
  -3  17   1    3.02    1.65
   3  17  -1    1.72    1.31
   3  17   0  948.27   40.67
  -3  17   0  934.28   42.22
   3  17   0  979.32   40.80
  -3  17  -1   56.90    5.68
   3  17   1   55.00    4.72
  -3  17  -1   58.18    5.98
  -3  17  -2   90.01    7.19
  -3  17  -2   87.54    7.64
  -3  17  -3    9.37    2.60
  -3  17  -4  282.52   14.96
   3  17   4  264.60   12.97
  -3  17  -5  138.28    8.02
   3  17   5  125.82    6.92
   3 -18  -5   40.62    3.45
  -3  18   4  438.36   18.59
   3  18  -4  360.88   17.41
  -3  18   3  165.18    9.05
   3  18  -3  136.59    8.11
   3  18  -3  149.01    8.45
   3  18  -2  519.61   23.44
   3  18  -2  526.09   23.55
   3  18  -1  150.16    8.85
  -3  18   1  159.01    9.77
   3  18  -1  151.54    8.81
   3  18   0  328.16   16.16
  -3  18   0  351.32   17.51
   3  18   0  338.77   16.20
   3  18   1  519.11   23.35
  -3  18  -1  538.28   24.87
  -3  18  -2  156.17    9.72
  -3  18  -2  165.59   10.12
  -3  18  -3   13.34    2.51
  -3  18  -4  323.94   15.66
   3  19  -4   24.47    2.25
   3  19  -3   26.65    2.67
   3  19  -2  505.71   21.83
   3  19  -2  483.61   21.71
   3  19  -1   13.87    2.15
  -3  19   1   15.05    2.39
   3  19  -1   15.63    2.14
   3  19   0  376.74   17.28
  -3  19   0  373.62   18.00
   3  19   0  382.32   17.29
  -3  19  -1   40.97    3.97
  -3  19  -2    7.97    1.70
  -3  19  -2    8.69    1.84
  -3  19  -3    3.26    1.19
   3  20  -2    6.85    1.28
   3  20  -2    4.14    1.07
   3  20  -1   53.26    3.76
  -3  20   0   76.95    4.98
   3  20   0   70.42    4.53
  -3  20  -1    0.83    0.90
   4   0 -11    0.80    1.31
   4   0 -10  715.27   31.82
   4   0 -10  664.68   30.79
   4   0 -10  653.07   31.73
   4   0 -10  743.69   34.66
   4   0  -9    1.85    1.76
   4   0  -9    2.45    1.56
   4   0  -9    1.43    1.65
   4   0  -8  294.99   19.01
   4   0  -8  275.44   16.11
   4   0  -8  272.73   14.82
   4   0  -7    1.01    2.25
   4   0  -7    1.07    0.95
   4   0  -7    0.59    1.21
   4   0  -6    2.15    2.09
   4   0  -6    3.01    1.69
   4   0  -5    1.72    1.80
   4   0  -5    0.38    1.12
   4   0  -4 2166.25   87.62
   4   0  -4 1692.95   79.57
   4   0  -4 2041.69   77.62
   4   0  -4 1661.07   79.05
   4   0  -3    1.90    1.79
   4   0  -3   -0.38    1.19
   4   0  -3    0.21    0.66
   4   0  -3    0.46    1.80
   4   0  -2   97.39    8.80
  -4   0   2  130.53    8.36
   4   0  -2  126.66    7.06
   4   0  -2  130.90   12.77
  -4   0   1    1.60    0.99
   4   0  -1   -0.46    2.03
  -4   0   1    0.28    1.12
  -4   0   0  611.31   28.95
  -4   0   0  622.64   27.77
  -4   0  -1    0.75    1.18
  -4   0  -1    1.84    1.17
  -4   0  -2  835.61   39.26
  -4   0  -2  812.54   35.33
  -4   0  -3   -0.63    1.29
  -4   0  -3    0.75    2.18
  -4   0  -4 2814.36  126.75
  -4   0  -5    0.63    1.24
  -4   0  -5   -0.80    2.34
  -4   0  -5   -1.34    1.60
  -4   0  -5    0.37    1.40
  -4   0  -6  131.78   10.87
  -4   0  -6  127.56    9.82
  -4   0  -7   -0.54    2.15
  -4   0  -7    0.83    1.56
  -4   0  -8   82.50    9.35
  -4   0  -8   96.55    8.75
  -4   0  -9   -0.71    1.75
   4  -1 -11   44.97    4.82
   4   1 -10    5.97    2.37
   4  -1 -10    3.45    1.72
   4   1 -10    6.24    2.81
   4  -1 -10    3.03    2.31
   4   1 -10    2.01    2.04
   4  -1 -10    3.38    2.01
   4  -1  -9  277.59   15.37
   4   1  -9  276.98   15.50
   4   1  -9  297.10   17.10
   4  -1  -9  314.89   18.99
   4   1  -9  283.20   17.08
   4  -1  -9  309.65   16.97
   4   1  -8 1522.18   68.92
   4  -1  -8 1490.50   67.24
   4  -1  -8 1565.11   63.21
   4  -1  -8 1515.77   64.38
   4   1  -8 1561.95   63.43
   4   1  -8 1412.73   64.79
   4  -1  -7  306.05   14.34
   4   1  -7  301.50   14.48
   4  -1  -7  254.18   14.70
   4   1  -7  247.95   15.21
   4   1  -7  245.54   17.73
   4  -1  -7  267.66   17.14
   4  -1  -7  254.18   18.66
   4  -1  -6  952.89   43.08
   4   1  -6  846.87   46.12
   4  -1  -6  839.51   44.61
   4  -1  -5  387.68   21.13
   4   1  -5  367.95   23.74
   4  -1  -5  379.00   23.03
   4   1  -4  299.32   19.01
   4  -1  -4  296.12   18.20
   4   1  -4  308.33   16.58
   4  -1  -4  307.40   16.38
   4   1  -4  276.36   18.96
   4  -1  -3   37.85    5.61
  -4   1   3   35.34    4.21
   4   1  -3   33.53    4.90
   4  -1  -3   32.30    4.48
   4  -1  -3   41.39    3.85
   4  -1  -3   27.73    4.61
   4   1  -2  170.15   11.73
   4  -1  -2  166.56   12.34
  -4   1   2  184.10   11.31
   4  -1  -2  183.70    9.45
   4  -1  -2  208.56   17.67
  -4  -1   1  339.54   16.38
   4  -1  -1  313.87   19.67
  -4   1   1  370.65   16.46
   4   1  -1  288.43   19.01
  -4   1   1  340.52   18.26
  -4  -1   1  373.89   17.74
   4  -1  -1  331.43   16.55
  -4  -1   0   10.87    2.36
  -4   1   0   14.21    2.31
  -4  -1   0   13.06    2.46
  -4   1  -1  146.62   10.93
  -4  -1  -1  144.48   10.48
  -4  -1  -1  133.27    9.34
  -4   1  -1  139.86    9.03
  -4  -1  -2  127.56   11.96
  -4   1  -2  125.98   11.41
  -4   1  -2  163.57   12.72
  -4  -1  -2  149.58   12.45
  -4  -1  -2  155.97   10.41
  -4   1  -2  182.08   10.54
  -4   1  -3   31.35    5.70
  -4  -1  -3   31.84    6.54
  -4  -1  -3   33.79    6.25
  -4   1  -3   47.74    7.48
  -4  -1  -4  179.82   18.32
  -4   1  -4  205.82   19.64
  -4  -1  -5  101.27    8.19
  -4   1  -5   89.35    8.27
  -4  -1  -5  123.25   15.89
  -4  -1  -5   91.65   11.70
  -4   1  -5  109.45   11.89
  -4   1  -5  128.40   17.12
  -4   1  -5  100.28    8.23
  -4  -1  -5   96.60    7.69
  -4  -1  -6  498.96   25.40
  -4   1  -6  493.14   25.12
  -4  -1  -6  509.67   24.35
  -4  -1  -7   86.59    8.77
  -4   1  -7   68.12    8.35
  -4   1  -7   81.13    8.22
  -4  -1  -7   76.20    7.32
  -4  -1  -8 1070.04   47.95
  -4   1  -8 1147.21   48.00
  -4  -1  -8 1054.48   45.44
  -4   1  -9  244.01   14.95
  -4  -1  -9  201.93   12.75
   4  -2 -11    1.05    1.25
   4  -2 -10 1260.06   56.18
   4   2 -10 1351.14   57.86
   4   2 -10 1314.38   58.09
   4  -2 -10 1425.40   57.65
   4  -2 -10 1462.14   59.71
   4   2  -9    2.47    2.30
   4  -2  -9    4.24    1.70
   4   2  -9    5.07    1.93
   4  -2  -9    3.59    2.27
   4   2  -9    3.41    2.33
   4  -2  -9    3.73    1.86
   4  -2  -8  277.62   17.95
   4  -2  -8  306.84   15.87
   4   2  -8  283.03   17.68
   4   2  -8  339.71   16.57
   4   2  -7   28.27    3.46
   4  -2  -7   26.06    3.13
   4   2  -7   27.13    4.35
   4  -2  -7   22.48    4.05
   4  -2  -7   21.49    4.78
   4  -2  -6  356.15   20.59
   4  -2  -6  325.09   21.91
   4  -2  -5   67.27    6.58
   4   2  -5   42.96    7.31
   4  -2  -5   56.18    7.07
   4  -2  -4   25.72    5.52
   4   2  -4   33.19    5.94
  -4   2   4   28.27    4.32
   4  -2  -4   30.15    4.65
   4   2  -4   34.86    5.71
   4  -2  -4   26.96    3.67
   4  -2  -3   45.82    6.10
  -4   2   3   42.30    4.90
   4   2  -3   46.65    6.03
   4  -2  -3   41.18    5.08
   4  -2  -2 1184.70   58.74
   4  -2  -2 1196.32   66.35
  -4   2   2 1338.62   57.61
   4  -2  -1  228.05   14.81
  -4  -2   1  207.56   11.56
   4   2  -1  235.22   14.64
  -4   2   1  214.91   13.33
   4  -2  -1  230.32   12.32
  -4  -2   0  629.24   29.98
  -4   2   0  692.80   32.25
   4  -2   0  639.75   28.38
  -4  -2  -1  532.35   26.86
  -4  -2  -1  558.35   27.87
  -4   2  -1  548.09   28.47
   4  -2   1  553.23   25.14
  -4  -2  -2 2921.09  122.61
  -4   2  -2 2915.55  124.66
  -4  -2  -2 2814.45  126.02
  -4   2  -2 3131.98  126.21
  -4  -2  -3  382.62   25.74
  -4   2  -3  423.15   24.78
  -4   2  -3  410.97   26.68
  -4  -2  -4  355.14   26.86
  -4   2  -4  347.32   27.28
  -4   2  -5   61.83    6.67
  -4  -2  -5   71.02    6.09
  -4  -2  -5   76.07    6.56
  -4   2  -5   61.15    6.64
  -4  -2  -5   88.25   13.19
  -4  -2  -5   75.29   10.46
  -4   2  -5   61.39    8.73
  -4   2  -5   79.83   13.60
  -4  -2  -5   51.66    4.89
  -4  -2  -6  750.12   34.90
  -4   2  -6  686.82   35.56
  -4   2  -6  717.61   35.84
  -4  -2  -6  763.27   34.14
  -4  -2  -7    4.45    2.55
  -4   2  -7    4.20    2.58
  -4  -2  -7    6.07    2.26
  -4  -2  -8  546.91   29.17
  -4   2  -8  622.90   31.70
  -4  -2  -8  556.16   27.54
  -4  -2  -9    5.52    2.38
  -4  -2  -9    9.88    2.38
   4  -3 -11   29.21    3.73
   4  -3 -10  117.93    8.25
   4  -3 -10  150.93   10.47
   4   3 -10  119.61    9.51
   4  -3 -10  141.46    9.23
   4  -3  -9   72.90    6.05
   4   3  -9   75.81    7.87
   4  -3  -9   69.63    7.25
   4   3  -9   58.31    7.24
   4  -3  -9   67.19    6.57
   4   3  -8  276.63   14.65
   4  -3  -8  277.31   14.17
   4   3  -8  244.34   16.43
   4  -3  -8  260.14   14.89
   4   3  -8  225.52   16.07
   4  -3  -8  245.10   15.71
   4   3  -7   90.71    6.58
   4  -3  -7   89.86    7.98
   4   3  -7   64.97    7.27
   4  -3  -7   71.89    7.12
   4  -3  -7   75.28    9.12
   4  -3  -7  102.24   16.72
   4  -3  -6 2226.34   96.08
   4  -3  -6 2295.84   98.61
  -4   3   5  363.45   22.36
   4  -3  -5  342.87   20.05
   4   3  -5  352.59   24.82
   4  -3  -5  402.87   22.48
   4  -3  -4  443.65   26.12
   4   3  -4  452.87   26.56
   4  -3  -4  475.30   23.80
  -4   3   4  403.39   23.17
   4   3  -4  386.46   26.56
   4  -3  -3  268.97   17.70
   4   3  -3  278.72   17.78
   4  -3  -3  276.09   15.84
  -4   3   3  254.52   15.97
   4   3  -3  259.33   19.38
   4  -3  -2   13.44    3.60
  -4   3   2   11.53    2.82
   4   3  -2   13.64    3.98
   4  -3  -1   11.53    3.35
  -4  -3   1    8.47    2.11
   4   3  -1   10.19    2.86
   4  -3  -1   13.56    2.74
  -4   3   1    8.51    2.51
   4  -3  -1   10.06    1.80
   4   3  -1    7.56    3.02
   4  -3   0  138.52    8.36
  -4   3   0  150.55   11.32
   4  -3   0  142.47    9.77
  -4  -3   0  120.25    9.85
  -4  -3  -1  207.21   14.45
   4  -3   1  223.65   12.20
  -4   3  -1  229.83   15.62
  -4  -3  -2  197.47   14.13
  -4  -3  -2  209.10   15.79
  -4   3  -2  162.23   13.06
  -4   3  -2  193.67   15.14
  -4  -3  -2  237.04   16.91
   4  -3   2  214.27   12.03
  -4  -3  -3   74.13   10.19
  -4   3  -3   56.29    8.55
  -4  -3  -3   60.72    8.67
  -4   3  -3   61.82    7.46
  -4  -3  -4   13.19    4.99
  -4   3  -4    8.84    4.38
  -4  -3  -5   81.48   12.45
  -4   3  -5   57.12   11.78
  -4  -3  -5   72.11   10.41
  -4   3  -5   47.97    7.51
  -4  -3  -5   62.10    6.35
  -4  -3  -5   48.59    4.96
   4   3   5   66.10    6.08
  -4  -3  -5   56.72    5.64
  -4   3  -5   51.07    6.35
  -4  -3  -5   51.40    5.24
  -4   3  -6 1469.70   64.97
  -4  -3  -6 1430.08   61.89
  -4  -3  -7   35.28    4.65
  -4   3  -7   35.03    6.17
  -4  -3  -7   43.67    5.48
  -4  -3  -8  367.07   19.37
  -4  -3  -8  350.61   20.29
   4   3   9   29.41    3.85
  -4  -3  -9   31.27    4.22
  -4  -3  -9   33.92    3.84
   4  -4 -11    1.37    1.36
   4  -4 -10  680.14   31.98
   4   4 -10  727.58   34.05
   4   4  -9   14.81    3.88
   4  -4  -9   13.22    3.18
   4   4  -9    9.96    3.37
   4  -4  -9   12.37    2.50
   4  -4  -8  331.13   18.85
   4   4  -8  311.59   20.28
   4  -4  -8  349.58   17.33
   4  -4  -8  383.13   20.68
   4   4  -8  316.75   20.36
   4   4  -7   21.63    4.47
   4  -4  -7   25.27    4.37
   4  -4  -7   23.80    4.59
   4  -4  -7   19.80    3.54
   4  -4  -7   33.28    9.22
   4  -4  -6   30.85    5.14
  -4   4   6   30.25    6.16
   4  -4  -6   29.78    7.90
  -4   4   5  306.91   20.46
   4  -4  -5  309.46   23.33
   4   4  -4 1152.45   60.89
   4   4  -4 1199.33   59.23
  -4   4   4 1226.13   56.43
   4  -4  -4 1362.33   59.36
   4   4  -3   57.11    8.44
   4   4  -3   40.31    6.32
  -4   4   3   48.86    6.17
   4  -4  -3   46.67    6.58
  -4   4   2  385.73   22.58
   4  -4  -2  363.03   22.53
   4  -4  -2  392.92   23.31
   4   4  -1 1249.44   54.17
  -4   4   1 1093.01   53.32
   4  -4  -1 1165.76   52.70
   4  -4  -1 1226.30   49.80
  -4  -4   1 1234.67   52.39
  -4   4   0  127.23   10.58
   4  -4   0  139.01    8.26
   4  -4   0  137.92    9.89
  -4  -4   0  127.08   10.35
   4  -4   1  552.13   25.31
  -4  -4  -1  523.80   29.19
  -4   4  -2   15.68    4.31
  -4   4  -2   16.16    3.46
   4  -4   2   20.23    3.15
  -4  -4  -2   19.00    4.41
  -4  -4  -3  110.48   12.50
  -4   4  -3  106.22   12.27
  -4  -4  -4 2845.22  111.60
  -4   4  -4 1980.19  107.63
  -4  -4  -5  355.55   22.36
   4   4   5  466.25   21.99
  -4  -4  -5  436.61   21.45
  -4   4  -5  393.05   23.34
  -4  -4  -5  426.68   21.06
   4   4   6  169.10   11.03
  -4  -4  -6  154.09   10.52
  -4   4  -6  134.34   12.43
  -4  -4  -7    7.47    2.26
  -4   4  -7   10.95    3.99
  -4  -4  -8  217.16   13.59
  -4   4  -8  239.09   17.92
  -4  -4  -9   81.50    6.45
   4   4   9   84.30    6.20
   4  -5 -11   19.77    2.82
   4  -5 -10  134.34    8.72
   4  -5 -10  156.13   10.28
   4  -5  -9   -0.25    1.09
   4  -5  -9    2.61    1.83
   4  -5  -9    1.07    1.70
   4   5  -9    1.47    2.54
   4   5  -8 1730.03   82.07
   4  -5  -8 1822.63   77.60
   4  -5  -8 1981.55   80.03
   4  -5  -8 2112.54   81.70
   4  -5  -7   20.40    3.75
   4   5  -7   16.35    4.05
   4  -5  -7   21.20    4.13
   4  -5  -7   11.97    2.87
   4  -5  -6  233.42   13.26
   4  -5  -6  270.11   23.52
   4  -5  -6  255.93   12.70
  -4   5   6  251.26   20.21
   4  -5  -6  205.85   15.56
   4  -5  -6  241.40   13.68
  -4   5   5   30.77    6.10
   4  -5  -5   20.96    5.48
   4   5  -4 1008.70   55.43
  -4   5   4 1059.84   51.58
   4  -5  -4 1160.21   53.28
   4   5  -3   -0.78    2.46
  -4   5   3    3.87    2.37
   4  -5  -3    1.67    1.99
  -4   5   2  627.47   33.21
   4  -5  -2  623.39   33.76
   4  -5  -2  615.94   32.81
   4  -5  -1    9.89    1.97
   4   5  -1    7.33    2.67
   4  -5  -1    7.44    2.78
  -4   5   1    8.39    2.95
  -4  -5   1    8.01    2.51
   4  -5   0  468.41   21.58
  -4   5   0  401.00   24.51
   4  -5   0  451.84   24.04
  -4  -5   0  454.21   24.63
   4  -5   1   38.79    4.35
   4  -5   1   43.90    6.01
  -4  -5  -1   44.24    6.43
  -4   5  -2   71.12    9.45
   4  -5   2   82.09    6.94
  -4  -5  -2   74.54    9.29
  -4   5  -3    4.38    2.95
  -4  -5  -4  318.34   25.13
  -4  -5  -5    8.28    3.01
  -4  -5  -5    6.56    1.81
  -4  -5  -5    6.42    2.01
   4   5   5    7.81    2.25
  -4  -5  -6  258.36   18.03
  -4  -5  -6  278.90   15.80
   4   5   7   19.47    3.41
  -4  -5  -7   16.53    3.18
  -4  -5  -8 1434.69   60.65
  -4  -5  -9    1.04    1.14
   4   5   9    0.97    1.18
   4  -6 -10  845.82   39.61
   4  -6 -10  960.75   40.87
   4  -6 -10 1003.97   41.32
   4  -6 -10  966.54   41.36
   4  -6  -9   14.81    2.65
   4  -6  -9   10.55    2.85
   4  -6  -9    9.79    2.65
   4   6  -9   16.21    3.92
   4   6  -8  284.48   18.89
   4  -6  -8  274.95   16.46
   4  -6  -8  325.27   17.92
   4  -6  -7   12.80    3.08
   4  -6  -7   12.43    3.38
   4  -6  -7   14.26    3.06
   4  -6  -6  212.25   21.02
   4  -6  -6  240.81   12.22
   4  -6  -6  186.10   12.32
  -4   6   6  196.89   18.94
   4  -6  -6  178.57   14.67
   4  -6  -5  146.47   14.95
  -4   6   5  116.64   13.08
   4   6  -4  803.12   46.34
   4  -6  -4  847.68   43.47
  -4   6   4  834.18   43.64
   4   6  -3 1031.71   49.85
   4  -6  -3  856.96   45.22
  -4   6   3  901.92   46.68
   4  -6  -3  986.14   50.39
   4   6  -2   10.27    3.29
   4  -6  -2   16.89    4.24
   4  -6  -2   16.74    4.69
  -4   6   2   11.56    4.06
   4  -6  -1  318.66   21.28
   4  -6  -1  370.44   18.03
  -4   6   1  321.68   22.19
   4  -6  -1  334.50   21.64
   4   6   0   19.28    3.59
  -4  -6   0   20.33    4.04
  -4   6   0    8.69    3.08
   4  -6   0   21.49    3.24
   4  -6   0   21.32    4.27
  -4  -6  -1  394.64   22.64
   4  -6   1  341.53   18.93
   4  -6   1  379.99   22.14
  -4   6  -2   15.83    4.99
   4  -6   2   25.79    3.99
   4  -6   2   28.05    5.25
  -4  -6  -2   36.13    6.23
   4  -6   3  957.74   47.84
  -4   6  -4  977.97   39.17
  -4  -6  -4  912.91   41.22
   4  -6   4  945.45   47.48
   4   6   4  882.87   39.45
  -4  -6  -4  837.53   39.25
   4   6   5  511.95   24.93
  -4  -6  -5  496.65   24.78
  -4  -6  -5  556.15   27.83
  -4  -6  -6    4.34    1.74
   4   6   6    8.04    2.34
  -4  -6  -6    7.46    3.02
   4   6   7   34.39    4.38
  -4  -6  -7   31.15    4.20
  -4  -6  -8  201.16   11.76
  -4  -6  -9   17.31    2.42
   4  -7 -10  228.39   12.72
   4  -7 -10  213.87   12.32
   4  -7  -9  156.50   11.00
   4  -7  -9  165.24   11.11
   4  -7  -8   91.41    8.25
   4  -7  -7   34.89    5.01
   4  -7  -7   34.20    5.14
   4  -7  -6 2705.06  114.54
   4  -7  -6 3016.48  130.78
   4  -7  -6 2885.83  113.83
  -4   7   5   51.61    9.19
   4  -7  -5   51.84    8.91
  -4   7   4   85.22   11.00
   4  -7  -4   70.87    9.47
   4  -7  -3    8.63    4.29
  -4   7   3   17.91    5.29
   4   7  -3   13.72    4.28
   4  -7  -3   11.34    3.78
   4  -7  -2   17.59    4.37
   4  -7  -2   16.48    5.29
  -4   7   2   11.98    4.56
   4  -7  -1  312.23   21.73
   4  -7  -1  363.81   18.68
  -4   7   1  356.77   24.74
   4  -7  -1  327.33   22.86
  -4  -7   0   57.10    6.83
   4   7   0   48.54    5.91
   4  -7   0   59.38    5.88
  -4   7   0   52.54    7.85
   4  -7   0   68.21    8.27
  -4  -7  -1  163.98   12.58
   4  -7   1  138.09   10.26
   4  -7   1  161.88   13.17
   4  -7   2  102.45    9.03
   4  -7   2  106.17   10.87
  -4  -7  -2  107.78   11.14
   4  -7   3    9.12    3.55
  -4  -7  -3    8.49    3.66
  -4  -7  -4    0.68    1.51
  -4   7  -4    2.61    1.38
   4   7   4    3.64    1.48
   4   7   4    2.37    1.30
   4   7   5    3.87    1.74
  -4  -7  -5    6.28    1.99
  -4  -7  -5    4.29    2.46
   4   7   6 1538.86   64.65
  -4  -7  -6 1515.40   67.01
   4   7   7    5.25    1.91
  -4  -7  -7    2.16    1.54
   4   7   8  225.34   12.19
  -4  -7  -8  218.94   12.06
  -4  -7  -9   20.54    2.45
   4  -8 -10 1013.07   42.33
   4  -8 -10  954.14   41.80
   4  -8  -9    1.00    1.43
   4  -8  -9    0.93    1.57
   4  -8  -8  528.42   26.69
   4  -8  -7    4.45    2.11
   4  -8  -6  426.34   21.90
   4  -8  -5   61.82    5.90
   4  -8  -5   80.31    6.21
  -4   8   5   82.62   12.34
   4  -8  -5   59.67    9.98
  -4   8   4  232.82   20.38
   4  -8  -4  158.04   15.39
   4  -8  -3   38.89    8.60
  -4   8   3   28.75    7.04
   4  -8  -3   27.77    5.90
  -4   8   2  617.49   39.80
   4  -8  -2  559.64   36.84
   4  -8  -1  500.73   26.07
  -4   8   1  510.26   33.94
   4  -8  -1  493.37   31.86
   4  -8   0  345.74   19.34
   4  -8   0  354.37   23.57
  -4  -8   0  385.65   21.67
   4   8   0  314.36   19.57
   4  -8   1  507.79   26.70
   4  -8   1  514.72   30.21
  -4  -8  -1  562.96   29.21
   4   8   1  461.13   27.03
   4  -8   2 1376.70   64.91
   4  -8   2 1425.19   68.55
   4   8   2 1489.65   68.87
   4  -8   3  169.84   15.76
  -4  -8  -3  180.39   10.87
  -4   8  -3  201.58   11.01
   4   8   3  207.90   18.25
   4   8   3  193.76   11.08
   4   8   3  174.59   10.48
  -4   8  -4  458.51   21.86
   4   8   4  445.68   22.01
  -4  -8  -4  455.42   22.78
   4   8   4  449.93   21.82
  -4   8  -5  300.32   16.40
  -4  -8  -5  344.29   18.36
  -4  -8  -5  297.04   16.52
   4   8   5  301.01   16.52
  -4  -8  -6  740.48   34.26
   4   8   6  681.85   32.37
   4   8   7  113.15    8.09
  -4  -8  -8  291.19   14.79
   4   8   8  318.31   15.18
   4  -9 -10   12.03    2.29
   4  -9 -10   11.18    2.20
   4  -9  -9  164.49   10.82
   4  -9  -9  163.15   10.66
   4  -9  -8  936.90   42.48
  -4   9   7   34.08    4.78
   4  -9  -7   38.27    5.29
   4  -9  -6  310.83   16.84
  -4   9   6  283.22   16.07
   4  -9  -4  279.65   15.07
  -4   9   4  302.67   25.71
  -4   9   4  244.81   13.68
  -4   9   3  307.25   26.74
   4  -9  -3  257.47   24.12
   4  -9  -2   69.62   11.77
   4  -9  -1    2.87    2.79
   4  -9   0   17.47    3.57
  -4  -9   0    8.97    3.15
   4  -9   0    6.69    3.61
   4   9   0    9.82    2.87
  -4  -9  -1  155.98   13.26
   4  -9   1  136.06   11.66
   4  -9   1  150.29   14.61
   4   9   1  139.51   11.88
  -4  -9  -2  222.90   16.78
   4   9   2  176.94   15.47
   4  -9   2  185.10   14.63
   4  -9   2  211.53   17.73
  -4  -9  -3   13.72    4.53
   4   9   3   14.60    2.61
   4   9   3    8.48    3.81
  -4   9  -3   16.16    2.78
  -4   9  -4   88.13    7.37
   4   9   4  110.95    7.90
  -4  -9  -4  120.25    8.36
   4   9   4  103.01    7.50
  -4   9  -5  123.28    9.21
   4   9   5  140.86    9.46
  -4  -9  -5  144.89   10.18
   4   9   5  139.27    9.32
  -4  -9  -6  717.48   33.22
   4   9   6  697.49   32.16
   4   9   7  112.85    7.80
   4   9   8  862.07   36.37
   4 -10 -10  612.51   27.02
   4 -10 -10  638.83   27.32
   4 -10  -9    4.93    1.83
   4 -10  -9    3.60    1.69
  -4  10   9    4.35    1.75
   4 -10  -8  250.95   14.79
   4 -10  -7    7.64    2.56
  -4  10   7   13.90    3.19
  -4  10   6   20.65    3.53
   4 -10  -6   22.90    3.82
  -4  10   5    0.91    1.25
  -4  10   4 1433.79   62.65
   4 -10  -4 1509.44   63.82
  -4  10   3  392.53   19.22
   4 -10  -3  415.60   22.19
   4 -10  -3  395.87   31.59
   4 -10  -2  298.83   27.04
   4 -10  -1   15.62    6.11
   4  10   0  846.22   41.40
   4 -10   0  814.49   41.38
   4 -10   0  719.50   46.08
  -4 -10  -1    0.65    1.56
   4  10   1    0.57    1.51
   4 -10   1   -0.59    1.41
   4 -10   1   -0.93    2.93
  -4 -10  -2  222.02   17.47
  -4  10  -2  223.74   12.27
   4  10   2  204.06   16.74
   4  10   2  229.55   12.08
   4 -10   2  189.06   15.82
   4 -10   2  186.33   18.16
  -4  10  -3  284.38   15.88
   4  10   3  319.15   16.00
  -4 -10  -3  303.22   22.53
  -4  10  -4 1065.23   45.72
  -4 -10  -4 1049.27   45.19
   4  10   4 1053.51   45.16
   4  10   4 1005.43   44.48
  -4  10  -5   34.48    4.51
   4  10   5   34.11    4.16
  -4 -10  -5   40.29    4.74
   4  10   5   34.12    4.07
  -4 -10  -6    1.80    1.78
   4  10   6    0.26    1.16
   4  10   7   19.16    2.72
   4  10   8   12.56    1.88
   4 -11  -9  225.28   12.37
   4 -11  -9  228.59   12.61
  -4  11   9  237.81   12.65
  -4  11   8  986.23   43.42
   4 -11  -8  956.81   42.66
   4 -11  -7  697.66   32.48
  -4  11   7  670.90   32.47
   4 -11  -6  461.01   24.56
  -4  11   6  510.47   24.59
  -4  11   5   94.75    7.73
  -4  11   5   88.86    7.24
  -4  11   4  153.18   10.15
   4 -11  -4  161.70   10.76
  -4  11   3  378.29   19.14
   4 -11  -3  400.10   21.53
   4 -11  -3  383.09   31.69
   4  11  -2   17.39    2.70
  -4  11   2   20.56    2.89
   4 -11  -2   14.50    4.62
   4  11  -2   22.55    3.13
   4 -11  -2   27.63    8.25
   4  11  -1  523.55   23.67
   4  11  -1  531.45   23.53
   4 -11  -1  431.67   27.46
   4 -11  -1  449.03   35.16
  -4  11   0    3.97    1.48
   4  11   0    2.25    1.23
   4 -11   0    5.68    2.60
  -4 -11   0    4.19    2.49
   4 -11   0    4.58    4.09
   4  11   0    4.13    1.53
   4  11   1  211.12   11.37
  -4  11  -1  198.59   11.21
   4  11   1  183.46   15.04
   4 -11   1  153.56   14.67
   4 -11   1  151.90   17.73
  -4 -11  -1  226.07   17.37
   4  11   1  202.58   11.27
  -4 -11  -2   45.69    7.74
   4  11   2   52.46    4.85
  -4  11  -2   60.26    5.42
   4  11   3    3.84    1.50
  -4  11  -3    3.29    1.55
  -4  11  -4   28.62    4.14
  -4 -11  -4   24.55    3.47
   4  11   4   26.89    3.60
   4  11   5   15.00    2.62
   4  11   5   11.84    2.45
  -4 -11  -5   13.05    2.73
   4  11   6  749.51   32.85
  -4 -11  -6  803.22   33.51
   4  11   6  686.24   32.35
   4  11   7  149.04    8.59
   4 -12  -9    0.35    0.89
   4 -12  -9    0.55    1.00
  -4  12   9    1.70    1.12
   4 -12  -8  281.03   15.01
   4 -12  -8  287.40   15.17
  -4  12   8  286.96   15.73
   4 -12  -7    4.97    2.13
  -4  12   7    3.80    1.89
  -4  12   6  187.45   12.17
  -4  12   5   39.39    4.78
  -4  12   5   31.68    4.25
   4 -12  -4  105.68    8.42
  -4  12   4  107.68    8.14
  -4  12   4  101.13    7.70
   4 -12  -3  370.13   19.73
  -4  12   3  351.65   17.95
   4  12  -3  320.84   17.19
   4  12  -2  556.90   24.16
  -4  12   2  507.81   24.32
   4 -12  -2  488.15   27.83
   4  12  -2  514.69   24.08
   4  12  -1   48.96    4.72
   4  12  -1   45.66    4.54
   4 -12  -1   45.53    7.29
   4 -12  -1   36.49   10.03
   4  12   0  419.45   19.87
   4  12   0  421.10   19.90
  -4 -12   0  465.81   28.15
  -4  12  -1   21.60    3.41
   4  12   1   26.54    3.42
   4  12   1   26.63    3.46
   4  12   2 1084.73   45.99
  -4  12  -2 1075.50   46.92
  -4  12  -3   82.32    7.12
   4  12   3   78.29    6.33
  -4 -12  -4    5.28    1.72
   4  12   4    2.35    1.36
   4  12   5   48.20    4.51
   4  12   5   48.29    4.77
  -4 -12  -5   54.18    5.02
  -4  12  -5   51.45    5.57
   4  12   6  444.31   21.10
   4  12   6  475.48   21.58
  -4 -12  -6  470.77   21.78
   4  12   7    8.64    1.66
  -4  13   8  122.50    8.25
  -4  13   7  133.35    9.53
  -4  13   6  944.51   41.51
  -4  13   6  899.20   41.28
  -4  13   5  240.20   14.39
  -4  13   5  235.80   14.05
   4 -13  -4   14.18    2.98
  -4  13   4   10.78    2.66
  -4  13   4   18.74    3.15
   4 -13  -3  286.74   16.26
  -4  13   3  269.17   15.17
   4  13  -3  257.74   14.26
  -4  13   2    1.14    1.22
   4 -13  -2   -0.46    2.48
   4  13  -2    0.71    1.26
   4  13  -2    1.46    1.19
   4 -13  -1   10.23    3.96
   4  13  -1    7.46    1.99
   4  13  -1    8.66    2.13
   4 -13   0   62.02    8.69
   4  13   0   67.61    5.64
   4  13   0   63.26    5.49
  -4  13  -1  288.63   16.83
   4  13   1  314.77   15.96
   4  13   1  309.83   15.87
   4  13   2  137.56    8.68
  -4  13  -2  127.10    9.55
   4  13   3   11.64    2.34
  -4  13  -3   11.50    2.85
  -4 -13  -4    3.25    1.54
   4  13   4    0.98    1.01
   4  13   5   71.77    5.64
  -4 -13  -5   78.57    5.91
  -4  13  -5   60.49    6.23
   4  13   6  755.36   31.83
  -4 -13  -6  797.70   32.16
   4  13   6  684.11   31.24
   4  13   7   18.90    2.09
  -4  14   8  155.32    9.00
  -4  14   8  155.99    8.87
  -4  14   7   27.01    3.66
  -4  14   6   41.29    4.74
  -4  14   6   33.75    4.41
  -4  14   5  195.28   12.31
  -4  14   5  193.27   12.17
   4 -14  -4  627.83   28.53
  -4  14   4  571.10   28.58
   4 -14  -3    1.34    2.11
  -4  14   3    2.89    1.62
   4  14  -3    3.12    1.51
   4 -14  -2    2.45    2.13
   4  14  -2    4.27    1.59
   4  14  -2    5.77    1.75
   4 -14  -1  530.78   28.87
   4  14  -1  532.92   24.75
   4  14  -1  536.99   24.79
   4 -14   0  127.66   12.39
   4  14   0  151.25    9.28
   4  14   0  142.20    9.06
  -4  14  -1  418.06   23.27
   4  14   1  471.43   21.96
   4  14   1  466.69   21.83
  -4  14  -2   94.04    8.19
  -4  14  -3   21.13    3.79
   4  14   3   21.37    3.02
  -4  14  -4  929.29   43.10
   4  14   4  974.13   40.98
  -4  14  -5  247.86   14.13
   4  14   5  223.90   12.02
  -4 -14  -5  228.24   12.01
   4  14   6    3.95    1.21
  -4 -14  -6    4.90    1.36
  -4  15   7  197.19   11.03
  -4  15   6   26.07    3.63
  -4  15   6   31.09    3.87
  -4  15   5    1.20    1.33
  -4  15   5    0.87    1.20
  -4  15   4  427.86   21.72
   4 -15  -3   48.83    5.24
  -4  15   3   40.40    4.86
   4  15  -3   40.34    4.23
   4 -15  -2  234.64   14.38
   4  15  -2  250.63   12.93
   4  15  -2  217.81   12.56
   4 -15  -1  308.81   18.27
   4  15  -1  294.95   15.34
   4  15  -1  293.85   15.28
   4  15   0   19.47    2.95
   4  15   0   20.35    2.95
  -4  15  -1  159.97   11.99
   4  15   1  162.72   10.08
  -4  15  -2  122.99    9.86
  -4  15  -3    5.49    2.61
   4  15   3    8.81    1.93
  -4  15  -4   82.42    7.57
   4  15   4   86.55    6.05
   4  15   5   10.53    1.82
  -4  15  -5   10.98    2.64
  -4 -15  -5    8.29    1.64
  -4 -15  -6  109.85    6.17
  -4  16   7    1.75    0.98
  -4  16   6   13.15    2.32
  -4  16   6   13.45    2.41
  -4  16   5    1.28    1.33
  -4  16   4  211.07   12.47
  -4  16   3  892.62   39.71
   4 -16  -3  939.26   39.43
   4  16  -3  917.84   38.32
   4  16  -3  848.84   38.20
   4 -16  -2   59.26    5.93
   4  16  -2   67.44    5.38
   4  16  -2   65.02    5.34
   4 -16  -1  180.16   12.12
   4  16  -1  189.51   10.60
   4  16  -1  178.58   10.46
   4  16   0    2.21    1.21
   4  16   0    1.54    1.05
   4  16   1  213.12   11.33
   4  16   1  180.97   10.74
  -4  16  -2   41.31    5.43
  -4  16  -3  679.45   32.51
   4  16   4  210.42   10.85
  -4  16  -4  208.37   13.00
   4  16   5   30.46    2.81
  -4  16  -5   33.56    3.86
  -4  17   6  999.46   41.31
  -4  17   5    9.79    1.98
  -4  17   4   68.35    5.66
  -4  17   3    2.74    1.42
   4  17  -3    2.15    1.05
   4  17  -3    1.11    0.96
   4 -17  -2   19.51    3.09
   4  17  -2   17.79    2.54
   4  17  -2   15.50    2.54
  -4  17   1  255.75   14.59
   4  17  -1  268.86   13.41
   4  17  -1  248.63   13.17
  -4  17   0   12.85    2.87
   4  17   0   12.77    2.30
   4  17   0   15.48    2.47
  -4  17  -1  183.29   11.95
   4  17   1  218.43   11.25
  -4  17  -2   18.66    3.13
  -4  17  -2   20.07    3.56
  -4  17  -3   -0.64    1.48
  -4  17  -4    1.56    1.42
   4  17   4    2.09    0.94
   4 -18  -5  102.08    6.07
  -4  18   4   25.08    2.96
   4  18  -3   20.53    2.45
   4  18  -3   19.27    2.39
   4  18  -2  201.72   10.44
   4  18  -2  192.11   10.31
   4  18  -1  394.85   18.92
  -4  18   1  436.34   20.36
   4  18  -1  416.64   19.01
  -4  18   0   78.59    6.38
   4  18   0   77.38    5.45
  -4  18  -1  485.21   23.48
   4  18   1  507.23   22.24
  -4  18  -2  216.46   11.98
  -4  18  -2  215.82   12.28
  -4  18  -3   32.60    3.74
   4  19  -4  112.46    6.10
   4  19  -3   56.84    3.97
   4  19  -2   96.59    5.85
  -4  19   1   25.55    3.03
   4  19  -1   27.81    2.77
  -4  19   0   30.95    3.41
   4  19   0   30.77    2.91
  -4  19  -1  212.42   11.33
  -4  19  -2   16.01    2.23
   4  20  -2   43.74    3.16
   4  20  -1    3.33    0.96
  -4  20   0  202.08   10.07
   5   0 -11    2.36    1.50
   5   0 -11   -0.23    1.12
   5   0 -10   31.90    4.28
   5   0 -10   34.66    4.38
   5   0  -9    0.36    1.53
   5   0  -9    1.35    1.36
   5   0  -9    2.40    2.35
   5   0  -9    0.72    1.48
   5   0  -8   36.35    5.90
   5   0  -8   32.06    3.91
   5   0  -8   34.88    4.64
   5   0  -7    0.90    1.78
   5   0  -7   -0.22    1.00
   5   0  -7    0.88    1.52
   5   0  -6   80.46    9.99
   5   0  -5    0.61    1.46
   5   0  -5    2.74    1.55
   5   0  -4   68.71    8.32
   5   0  -4   75.60    8.38
   5   0  -4   96.87    7.30
   5   0  -3   -0.51    1.73
   5   0  -3    1.16    2.67
   5   0  -2 3715.14  168.59
   5   0  -2 3980.71  175.29
  -5   0   1    0.48    1.04
   5   0  -1    1.69    2.22
  -5   0   1   -0.38    1.10
  -5   0   0   22.80    3.38
  -5   0   0   12.16    3.07
  -5   0  -1    1.35    1.34
  -5   0  -1    1.38    1.65
  -5   0  -2   40.88    5.09
  -5   0  -2   33.13    6.46
  -5   0  -2   37.83    6.25
  -5   0  -3    0.85    1.44
  -5   0  -3    0.82    1.69
  -5   0  -4 4895.89  209.24
  -5   0  -5   -0.40    1.42
  -5   0  -5    0.68    1.34
  -5   0  -6    5.14    2.63
  -5   0  -6   12.52    3.01
  -5   0  -7    0.52    2.05
  -5   0  -7   -0.40    1.25
  -5   0  -8    5.54    2.21
   5   0   9   -0.23    1.48
   5   0   9    0.45    1.53
   5  -1 -11  174.89   10.68
   5   1 -11  151.93    9.71
   5  -1 -11  179.15   10.06
   5  -1 -10   35.59    4.00
   5   1 -10   32.88    4.46
   5  -1 -10   35.88    4.64
   5   1 -10   38.87    4.85
   5   1  -9  184.77   12.77
   5  -1  -9  181.72   11.51
   5  -1  -9  202.07   12.71
   5   1  -9  211.47   12.09
   5  -1  -9  206.47   14.17
   5  -1  -9  223.19   13.29
   5   1  -9  204.69   13.29
   5  -1  -8  113.03    9.92
   5   1  -8  100.65    7.59
   5  -1  -8  105.33    8.32
   5  -1  -8  108.58    7.64
   5   1  -8  104.28    8.70
   5  -1  -7  234.54   14.68
   5   1  -7  227.96   12.08
   5  -1  -7  219.14   11.69
   5  -1  -7  197.90   12.31
   5   1  -7  194.31   12.72
   5  -1  -6  343.96   20.50
   5   1  -6  322.38   23.43
   5  -1  -6  349.11   23.14
   5   1  -5  352.12   23.30
   5   1  -5  389.11   24.35
   5  -1  -5  396.43   23.65
   5  -1  -5  383.59   20.74
   5  -1  -4  334.41   20.79
   5   1  -4  257.45   18.75
   5   1  -4  289.52   18.76
   5  -1  -4  247.77   17.41
   5  -1  -4  296.16   15.69
   5  -1  -3   30.29    5.38
   5   1  -3   35.03    6.09
   5  -1  -3   24.54    5.33
  -5   1   3   26.43    4.02
   5  -1  -2    4.35    2.33
   5  -1  -2    3.23    4.43
   5   1  -2   -0.70    2.77
  -5   1   2    4.73    1.89
  -5  -1   1  252.57   14.16
   5   1  -1  257.03   17.60
   5  -1  -1  227.75   17.39
  -5   1   1  268.62   16.37
  -5   1   0 4354.13  173.10
  -5  -1   0 4275.97  173.45
  -5  -1   0 4447.15  174.52
  -5  -1  -1   21.58    3.85
  -5   1  -1   32.63    4.28
  -5   1  -1   25.21    4.55
  -5  -1  -1   27.26    4.70
  -5  -1  -2 2346.64   99.86
  -5   1  -2 2496.39   99.53
  -5  -1  -2 2606.16  105.10
  -5  -1  -2 2343.56  105.69
  -5   1  -2 2520.83  104.38
  -5   1  -3   13.61    4.44
  -5  -1  -3   21.09    5.55
  -5  -1  -3   13.58    4.54
  -5   1  -3    7.80    3.63
  -5   1  -4   41.39    8.91
  -5  -1  -4   36.58    8.29
  -5  -1  -5   72.67    5.94
  -5   1  -5   68.28    5.50
  -5   1  -5   65.94    7.38
  -5  -1  -5   83.94    7.41
  -5   1  -5   78.85    7.30
  -5  -1  -5   89.79    7.26
  -5   1  -6  202.85   14.77
  -5  -1  -6  223.62   14.49
  -5  -1  -6  216.15   13.51
  -5   1  -6  205.16   13.97
  -5  -1  -7   96.54    9.04
  -5   1  -7  109.36    9.28
  -5  -1  -7   92.25    8.03
  -5  -1  -8  474.78   25.93
  -5   1  -8  533.35   26.18
  -5  -1  -8  469.48   24.19
   5   1   9  137.45    8.55
   5   1   9  133.87    8.42
   5  -1   9  135.20    8.90
   5  -2 -11   41.46    4.61
   5   2 -10  104.93    8.25
   5  -2 -10  113.22    8.10
   5  -2 -10   90.61    6.93
   5   2 -10   95.74    7.99
   5   2  -9    3.99    2.28
   5  -2  -9    1.83    1.43
   5   2  -9    2.01    1.91
   5  -2  -9    0.68    1.61
   5  -2  -9    3.82    2.26
   5  -2  -8    2.10    2.06
   5   2  -8    1.60    1.28
   5  -2  -8    3.97    1.70
   5   2  -8    2.38    1.95
   5   2  -7    6.58    1.75
   5   2  -7    3.53    1.84
   5  -2  -7    4.18    2.31
   5  -2  -7    3.05    2.18
   5  -2  -6    2.65    3.52
   5   2  -6    4.35    2.93
   5  -2  -6    3.46    2.33
   5  -2  -6    0.49    1.30
   5  -2  -5   35.48    7.22
   5   2  -5   28.43    5.77
   5   2  -5   20.18    5.03
   5  -2  -5   24.26    4.86
   5  -2  -5   27.08    4.23
   5  -2  -4 1419.95   62.00
   5   2  -4 1284.48   61.95
   5   2  -4 1336.18   60.61
   5  -2  -4 1316.44   59.01
  -5   2   4 1298.56   58.01
   5  -2  -4 1255.55   55.43
   5  -2  -3  169.19   13.71
   5   2  -3  176.60   14.27
  -5   2   3  161.90   11.89
   5  -2  -2  410.00   25.05
   5  -2  -2  432.94   34.87
   5   2  -2  458.86   26.05
  -5   2   2  406.73   22.59
  -5  -2   1  152.92    9.77
   5  -2  -1  130.59   12.23
   5   2  -1  170.54   12.76
   5   2  -1  123.15   12.97
  -5   2   1  158.29   11.67
  -5  -2   0 3029.36  123.36
  -5  -2  -1   85.30    8.21
  -5   2  -1  101.25    9.69
  -5  -2  -1   80.50    8.42
  -5  -2  -2 2106.44   90.87
  -5  -2  -2 2197.79   96.23
  -5   2  -2 1880.06   93.11
  -5   2  -2 2142.27   94.34
  -5   2  -3  264.56   20.14
  -5  -2  -3  317.23   22.97
  -5   2  -3  253.99   21.02
  -5  -2  -3  291.66   22.56
  -5  -2  -4 1556.11   76.21
  -5   2  -4 1397.17   75.59
  -5  -2  -5   31.30    4.16
  -5   2  -5   28.46    4.57
  -5  -2  -5   25.02    3.54
  -5  -2  -5   26.87    4.04
  -5   2  -5   26.86    4.59
  -5  -2  -6  873.96   41.18
  -5  -2  -6  961.22   41.14
  -5   2  -6  961.26   43.27
  -5  -2  -7    9.87    2.90
  -5   2  -7   15.75    3.87
  -5  -2  -7   16.34    3.13
  -5  -2  -8   88.48    8.08
  -5   2  -8  100.96    9.36
  -5  -2  -8   86.43    7.22
   5   2   9    3.93    1.61
   5   2   9    6.82    1.75
   5  -2   9    8.97    2.22
   5  -3 -11   49.48    4.96
   5   3 -10    3.73    1.95
   5  -3 -10   10.31    2.35
   5  -3 -10    9.71    2.13
   5   3 -10    6.13    2.41
   5   3  -9   85.03    8.31
   5  -3  -9   89.25    6.89
   5  -3  -9   92.11    8.30
   5  -3  -9   90.78    7.72
   5   3  -9   91.23    8.62
   5  -3  -8  283.49   16.73
   5   3  -8  270.21   17.07
   5  -3  -8  274.48   14.63
   5   3  -7  128.56    8.22
   5   3  -7  106.18    9.19
   5  -3  -7  104.53    8.77
   5  -3  -7  102.48   10.75
   5   3  -6    6.75    3.44
   5  -3  -6    7.50    3.25
   5  -3  -6    1.98    1.45
   5  -3  -6    7.32    4.59
   5  -3  -5  380.76   25.28
   5   3  -5  333.74   23.57
   5  -3  -5  345.23   21.26
  -5   3   5  334.69   20.99
   5  -3  -5  315.29   18.47
   5   3  -5  280.74   22.57
   5  -3  -4 1697.72   73.64
   5   3  -4 1601.68   73.03
   5  -3  -4 1676.07   70.86
  -5   3   4 1574.84   70.32
   5  -3  -4 1561.82   67.19
   5   3  -4 1566.49   75.08
  -5   3   3  243.83   15.82
   5  -3  -3  236.54   17.41
   5  -3  -2  973.60   53.16
  -5   3   2 1132.18   51.71
  -5  -3   1   33.34    4.44
   5  -3  -1   34.44    5.94
   5   3  -1   31.35    5.20
  -5   3   1   35.73    5.48
   5  -3  -1   31.61    4.49
   5   3  -1   39.77    6.58
  -5  -3   0 2523.76  105.13
  -5  -3  -1    7.60    2.85
  -5   3  -1    9.59    3.28
  -5  -3  -2 1991.43   91.03
  -5   3  -2 1960.25   91.84
  -5   3  -2 2068.64   93.73
  -5   3  -3    1.80    2.14
  -5  -3  -3    1.87    2.22
  -5   3  -3    0.69    1.43
  -5  -3  -3    3.49    3.11
  -5  -3  -4  174.74   17.91
  -5   3  -4  131.16   16.79
  -5  -3  -4  128.09    9.56
  -5  -3  -4  121.91    8.90
  -5   3  -4  129.66    9.62
  -5  -3  -4  143.47    9.13
  -5   3  -4  137.84   10.54
   5   3   4  159.23   10.02
  -5  -3  -5   23.48    3.70
  -5  -3  -5   31.36    4.15
  -5   3  -5   26.78    4.52
  -5   3  -5   33.86    5.25
   5   3   5   26.51    3.98
  -5   3  -6  781.85   35.61
  -5  -3  -6  697.92   31.68
  -5  -3  -7  116.82    9.19
  -5   3  -7  113.09   10.97
  -5  -3  -8  134.20    9.70
   5   3   9   18.07    2.69
   5   3   9   20.82    2.64
   5  -3   9   25.62    3.91
   5  -4 -11   10.03    2.27
   5   4 -10   86.51    7.38
   5   4 -10   92.48    7.78
   5  -4 -10   83.81    6.35
   5  -4  -9   10.19    2.28
   5   4  -9    8.95    3.04
   5  -4  -9   12.31    3.00
   5   4  -9    8.10    2.89
   5   4  -8    0.94    2.10
   5  -4  -8    6.31    2.38
   5   4  -7    9.44    3.13
   5  -4  -7    9.40    2.98
   5  -4  -7   11.55    2.80
   5  -4  -6    5.82    3.92
   5   4  -6    1.87    1.67
   5  -4  -6    4.82    1.90
   5  -4  -6    3.32    1.42
   5  -4  -6    2.57    1.84
   5  -4  -5   37.28    7.24
  -5   4   5   38.72    6.35
   5  -4  -5   31.87    4.65
   5   4  -5   25.80    6.84
   5  -4  -4  866.57   45.66
  -5   4   4  884.23   43.98
   5   4  -4  995.90   49.80
   5  -4  -3   24.81    5.32
   5   4  -3   23.98    4.88
  -5   4   3   31.64    5.33
   5   4  -3   32.39    6.23
   5  -4  -2 2662.17  123.89
  -5   4   2 2898.95  122.48
  -5  -4   1 1359.88   58.55
  -5   4   1 1273.33   60.17
   5  -4  -1 1379.09   56.02
   5  -4  -1 1299.73   58.78
   5   4  -1 1286.27   59.91
  -5  -4   0  104.03    9.75
   5  -4   0  109.98    7.85
   5  -4   0  109.78    9.43
   5   4   0   85.25   10.38
  -5  -4  -1  280.76   19.00
   5  -4   1  282.94   15.74
  -5   4  -1  281.52   19.81
  -5  -4  -2  379.06   24.08
   5  -4   2  350.59   19.52
  -5   4  -2  383.28   25.14
  -5   4  -3  589.69   36.75
  -5   4  -4 2312.96  108.09
  -5  -4  -4 1949.70   90.88
  -5  -4  -4 2312.87   89.79
  -5   4  -4 1871.76   91.60
   5   4   4 2383.97   90.85
  -5  -4  -5   14.56    3.36
  -5  -4  -5   16.28    2.91
  -5   4  -5   20.50    4.41
   5   4   5   23.52    3.69
  -5  -4  -6  236.26   15.50
   5   4   6  289.48   15.91
  -5  -4  -6  278.78   15.46
  -5   4  -6  283.83   19.02
  -5  -4  -7  171.96   11.34
  -5   4  -7  173.39   14.33
  -5  -4  -8    1.16    1.46
   5   4   8    4.50    1.83
   5   4   9   56.60    4.53
   5  -5 -11    6.19    1.85
   5   5 -10  181.30   11.69
   5  -5  -9    3.74    2.19
   5  -5  -9    8.55    2.62
   5   5  -9    5.84    2.73
   5   5  -8  444.19   25.21
   5  -5  -8  444.07   23.45
   5  -5  -8  490.88   24.97
   5   5  -7   68.70    7.61
   5  -5  -7   66.52    6.80
   5  -5  -7   73.73    6.29
   5  -5  -7   59.30    6.22
   5  -5  -6  921.17   42.50
   5  -5  -6 1146.12   57.71
   5   5  -6  930.08   44.00
   5  -5  -6  979.01   43.08
   5  -5  -6 1140.41   42.36
  -5   5   6  952.81   51.06
   5  -5  -6  778.77   44.87
  -5   5   5   22.50    5.19
   5  -5  -5   28.84    6.55
   5   5  -5   19.88    6.04
  -5   5   4   59.99    7.99
   5  -5  -4   51.90    7.98
   5   5  -4   63.52    9.92
  -5   5   3   39.07    6.45
   5  -5  -3   42.12    7.21
   5   5  -3   49.74    7.68
  -5   5   2   41.92    6.90
   5  -5  -2   48.59    7.55
   5   5  -2   39.24    5.91
  -5   5   1    6.14    2.65
   5  -5  -1    5.14    2.68
  -5  -5   1    9.46    2.85
   5  -5  -1    8.93    2.06
   5   5  -1   11.33    3.20
   5  -5   0 3178.58  127.77
  -5   5   0 2756.83  132.45
   5  -5   0 3118.99  131.36
   5  -5   1  189.88   12.43
   5  -5   1  208.17   15.35
  -5  -5  -1  210.36   16.03
   5  -5   2 1787.86   75.70
  -5   5  -2 1707.82   82.62
  -5  -5  -2 1870.03   82.55
  -5   5  -3    9.11    4.19
  -5  -5  -4    7.99    2.47
   5   5   4    8.91    2.28
  -5   5  -4   15.47    3.61
  -5   5  -4   10.99    5.43
  -5  -5  -5    6.72    2.68
  -5  -5  -5    2.54    2.21
  -5  -5  -5    5.49    1.77
  -5   5  -5   10.13    3.30
   5   5   5    6.81    1.99
  -5  -5  -6   81.22    8.13
   5   5   6  111.39    8.29
  -5   5  -6  100.03   10.61
  -5  -5  -6  104.49    7.82
  -5  -5  -7   21.08    3.36
   5   5   7   23.05    3.54
   5   5   8  747.13   33.79
  -5  -5  -8  806.40   34.42
   5  -6 -10  156.92   10.45
   5  -6 -10  165.91   10.38
   5   6  -9   30.45    4.83
   5  -6  -9   35.42    4.74
   5  -6  -9   33.15    4.79
   5   6  -8    6.13    2.81
   5  -6  -8    9.11    2.87
   5  -6  -8    3.76    2.45
   5  -6  -7   15.93    3.43
   5  -6  -7   14.73    3.05
   5  -6  -7   16.19    3.25
   5  -6  -6    3.53    1.68
   5  -6  -6    2.29    1.75
   5  -6  -6    5.04    1.90
  -5   6   6    0.98    2.02
   5  -6  -6    2.36    3.14
  -5   6   5  173.63   16.25
   5  -6  -5  187.32   17.59
   5   6  -4  190.59   17.63
  -5   6   4  165.83   15.13
   5  -6  -4  160.35   15.20
  -5   6   3  684.41   38.62
   5  -6  -3  625.75   37.48
  -5   6   2 2724.07  114.46
   5  -6  -2 2526.69  113.16
   5  -6  -2 2516.24  112.12
  -5   6   1  409.60   28.44
   5  -6  -1  447.99   27.80
   5  -6  -1  510.68   24.34
  -5   6   0  325.24   23.44
   5  -6   0  397.57   23.36
   5  -6   0  352.44   19.58
   5  -6   1  423.89   24.87
   5  -6   1  358.24   20.60
  -5  -6  -1  423.83   24.86
  -5   6  -2  139.82   15.39
   5  -6   2  158.39   11.91
   5  -6   2  181.68   15.33
  -5   6  -3  359.02   28.21
   5  -6   3  410.63   26.58
   5   6   4 2127.71   87.03
   5  -6   4 1936.21   95.68
  -5   6  -4 2144.39   86.68
  -5  -6  -4 2192.64   88.61
  -5  -6  -5  214.82   13.99
   5   6   5  186.29   11.95
   5   6   6  345.90   17.45
  -5  -6  -6  330.41   16.80
   5   6   7   56.95    5.36
   5   6   7   71.51    6.05
  -5  -6  -7   55.98    5.34
   5   6   8    4.57    1.60
  -5  -6  -8    8.02    1.86
   5  -7 -10  103.15    7.61
   5  -7 -10   87.59    7.03
   5  -7  -9   10.90    2.75
   5  -7  -9   10.34    2.84
   5  -7  -8  408.04   21.64
   5  -7  -8  430.82   22.80
   5  -7  -7  298.92   17.57
   5  -7  -6   28.81    4.31
   5  -7  -6   39.24    4.34
   5  -7  -6   19.54    4.55
   5  -7  -6   38.16    8.98
   5  -7  -5   17.53    3.14
   5  -7  -5   14.12    2.54
   5  -7  -5   17.68    5.51
  -5   7   5   17.81    5.43
   5  -7  -4  866.78   47.04
   5   7  -4  946.50   49.25
  -5   7   4  858.01   48.34
   5  -7  -3    4.57    3.02
   5   7  -3    8.50    3.49
  -5   7   3   15.44    5.01
   5  -7  -2  484.20   29.93
  -5   7   2  534.59   33.85
   5  -7  -2  453.91   31.42
  -5  -7   1   60.03    7.08
   5  -7  -1   51.24    8.00
  -5   7   1   43.19    8.08
   5  -7  -1   57.34    5.77
   5  -7  -1   35.86    7.02
   5  -7   0 1948.09   81.77
   5  -7   0 1850.85   86.53
  -5  -7  -1    0.61    1.46
   5  -7   1    1.70    1.24
   5  -7   1    2.79    2.49
   5  -7   2 1723.98   76.59
   5  -7   2 1609.84   71.26
   5   7   3    3.69    1.58
   5   7   3    3.43    1.41
   5   7   4  161.17   10.31
  -5   7  -4  161.98   10.18
  -5  -7  -4  173.77   11.34
   5   7   5   54.89    5.55
  -5  -7  -5   71.59    7.09
  -5  -7  -6  936.33   43.85
   5   7   6 1005.00   42.95
   5   7   7    1.29    1.27
  -5  -7  -7    0.97    1.15
   5   7   8   45.60    3.97
  -5  -7  -8   36.49    3.65
   5  -8 -10   90.22    6.80
   5  -8 -10   94.53    7.06
   5  -8  -9   34.25    4.53
   5  -8  -8    5.58    2.38
  -5   8   7   72.14    6.85
   5  -8  -7   70.76    7.19
   5  -8  -6   43.48    4.82
   5  -8  -6   32.88    4.72
   5  -8  -5   74.81    6.95
   5  -8  -5  110.53    7.45
   5  -8  -5   97.19   13.23
  -5   8   5  107.83   14.39
   5  -8  -4  928.41   51.84
  -5   8   4 1142.32   58.17
   5  -8  -3   23.46    5.88
  -5   8   3   23.03    6.97
  -5   8   2  705.51   43.96
   5  -8  -2  591.37   39.43
  -5   8   1  194.15   19.51
   5  -8  -1  215.00   13.81
   5  -8  -1  219.80   18.77
   5  -8   0 1193.60   55.62
   5  -8   0 1203.61   61.17
  -5  -8  -1  557.07   29.79
   5  -8   1  480.04   26.56
   5  -8   1  501.57   30.96
   5   8   1  467.23   27.87
   5  -8   2 1774.63   84.53
   5  -8   2 1661.25   79.44
   5   8   2 1836.35   84.10
   5   8   3  165.56   10.36
   5  -8   3  172.78   16.95
  -5   8  -3  204.69   11.39
   5   8   3  199.09   11.22
   5   8   3  171.90   17.14
   5   8   4  421.11   21.61
  -5   8  -4  436.60   21.94
   5   8   4  486.88   22.40
  -5  -8  -4  459.70   22.60
   5   8   5   19.13    3.22
  -5   8  -5   21.40    3.43
  -5  -8  -5   19.31    3.59
  -5  -8  -6 1062.62   47.15
   5   8   6 1076.24   46.34
   5   8   7   90.02    6.65
   5   8   8   25.05    2.75
   5  -9 -10   79.19    6.04
   5  -9 -10   89.96    6.45
   5  -9  -9   81.59    7.01
   5  -9  -8    4.95    2.36
   5  -9  -7    1.17    2.03
  -5   9   7    4.59    1.97
   5  -9  -7    8.09    2.73
   5  -9  -6  471.57   23.99
   5  -9  -5  696.50   33.91
  -5   9   5  745.35   33.90
   5  -9  -5  749.59   34.26
   5  -9  -5  792.32   34.02
   5  -9  -5  814.12   46.40
  -5   9   4   50.74    4.83
  -5   9   4   46.23   10.15
   5  -9  -4   49.26    5.90
  -5   9   3  144.51   19.02
   5  -9  -3  134.82   18.11
   5  -9  -2   23.44    7.54
  -5   9   2   26.96    8.49
   5  -9  -1   93.17   12.63
   5  -9   0 1990.08   92.95
   5  -9   0 1992.47   99.81
   5  -9   1    1.12    1.49
  -5  -9  -1   -0.65    1.54
   5   9   1    2.94    1.98
   5  -9   1    0.92    1.89
  -5  -9  -2 2173.27   89.85
  -5   9  -2 2215.10   80.79
   5   9   2 1936.04   79.95
   5   9   2 1913.85   88.52
   5  -9   2 1706.83   89.95
   5  -9   2 1666.95   85.12
   5   9   2 1944.02   80.96
   5   9   3    1.03    0.97
  -5   9  -3    0.55    0.98
   5   9   4   12.99    2.57
  -5  -9  -4   18.20    3.06
   5   9   4   21.40    3.31
  -5   9  -4   16.45    3.00
   5   9   5   41.06    4.52
  -5  -9  -5   46.33    5.16
  -5   9  -5   35.74    4.56
   5   9   5   36.35    4.39
  -5  -9  -6  250.73   14.27
   5   9   6  251.55   13.81
   5   9   7  234.96   12.46
   5   9   8  367.34   16.55
   5 -10 -10   25.99    3.11
   5 -10 -10   30.59    3.17
   5 -10  -9    9.77    2.42
   5 -10  -9   16.95    2.99
  -5  10   8    6.81    2.43
   5 -10  -8   11.34    2.91
  -5  10   7   37.33    4.92
   5 -10  -7   32.43    5.06
  -5  10   6   15.05    3.00
   5 -10  -6   13.48    3.07
  -5  10   5   62.28    6.06
   5 -10  -5   72.83    6.65
  -5  10   4    5.13    1.71
   5 -10  -4    6.17    2.80
  -5  10   3  171.35   10.40
   5 -10  -3  167.71   13.36
   5 -10  -3  191.49   21.91
   5 -10  -2 3748.42  172.00
   5  10  -2 3655.10  151.88
  -5  10   2 3878.09  152.36
  -5  10   2 3970.69  152.33
   5 -10  -2 3685.08  159.52
   5  10  -2 3959.79  152.07
   5 -10  -1    1.18    3.72
   5  10  -1    3.19    1.46
  -5  10   1    0.89    1.12
   5 -10  -1    1.62    3.27
   5  10  -1    0.87    1.13
   5  10   0   44.16    4.32
  -5  10   0   46.89    4.44
  -5 -10   0   51.18    7.52
   5 -10   0   41.72    6.40
   5 -10   0   45.60    9.21
   5  10   0   45.54    4.47
   5  10   1  170.25    9.83
  -5  10  -1  144.47    9.21
   5  10   1  157.52    9.31
   5  10   1  160.72   13.55
  -5 -10  -1  181.66   15.01
   5 -10   1  124.98   12.46
   5 -10   1  134.51   16.03
   5  10   1  153.19    9.44
  -5 -10  -2    0.76    1.80
   5 -10   2   -1.05    2.78
   5  10   2    0.82    1.26
   5  10   2    1.90    1.06
  -5  10  -3   72.64    6.19
   5  10   3   55.34    5.34
   5  10   4 2841.77  117.92
  -5  10  -4 3131.89  119.67
   5  10   4 3005.86  118.90
  -5 -10  -4 2860.80  118.39
   5  10   5  239.18   13.35
  -5  10  -5  226.64   14.00
   5  10   5  256.19   13.86
  -5 -10  -5  251.71   13.99
   5  10   6   48.45    4.62
  -5 -10  -6   45.04    4.70
  -5 -10  -6   52.22    4.99
   5  10   7    1.09    0.99
   5 -11  -9  184.14   10.99
   5 -11  -9  202.21   11.13
  -5  11   8   11.08    2.85
   5 -11  -8   10.03    2.69
  -5  11   7  637.38   30.78
   5 -11  -7  645.88   31.15
  -5  11   6  158.28   10.83
  -5  11   5  100.82    8.21
   5 -11  -5  113.19    8.70
  -5  11   4  121.08    8.81
   5 -11  -4  134.21   10.07
  -5  11   3  367.52   18.74
   5 -11  -3  393.37   22.12
   5 -11  -3  339.16   31.42
   5  11  -2   19.11    2.86
   5  11  -2   18.56    2.66
  -5  11   2   23.15    3.15
   5 -11  -2   19.83    5.57
   5 -11  -2   19.54    8.03
   5 -11  -1   71.07   13.01
   5  11  -1   86.14    6.39
  -5  11   1   89.84    6.70
   5 -11  -1   73.27    9.70
   5  11  -1   87.15    6.45
   5  11   0 1235.28   49.44
  -5  11   0 1145.12   49.31
  -5 -11   0 1271.88   57.80
   5  11   0 1226.16   49.45
   5  11   1    0.25    1.25
   5  11   1    5.14    1.53
  -5  11  -1    1.75    1.40
  -5 -11  -1    3.68    2.77
   5 -11   1    1.20    2.85
   5  11   1    0.25    1.06
   5  11   2 1643.29   66.03
  -5  11  -2 1631.86   66.35
   5  11   2 1489.17   65.17
  -5  11  -3  109.21    8.20
   5  11   3   94.82    7.29
   5  11   4   17.95    2.94
  -5  11  -4   15.99    3.19
   5  11   5  166.84    9.96
   5  11   5  165.64   10.32
  -5 -11  -5  181.89   10.64
  -5 -11  -6  396.44   18.52
   5  11   6  364.98   17.91
   5  11   7    0.60    0.82
   5 -12  -9   95.65    6.23
   5 -12  -9   87.57    6.18
  -5  12   9   91.19    6.31
   5 -12  -8   11.02    2.44
  -5  12   8    6.87    2.16
   5 -12  -7    2.66    1.63
  -5  12   7    2.71    1.76
  -5  12   6   97.93    8.20
  -5  12   6   95.42    7.91
  -5  12   5   12.69    3.06
  -5  12   5   11.15    2.64
   5 -12  -4  956.09   42.25
  -5  12   4  906.81   41.28
   5 -12  -3  230.67   15.08
  -5  12   3  213.25   12.81
  -5  12   2  291.55   15.49
   5 -12  -2  283.84   19.64
   5  12  -2  301.16   15.08
   5  12  -2  280.43   14.92
   5 -12  -1    7.84    4.76
   5  12  -1   13.63    2.50
   5  12  -1   15.88    2.66
   5 -12   0 1040.19   53.59
   5  12   0 1183.63   48.45
   5  12   0 1140.63   48.44
   5  12   1   10.43    2.32
   5  12   1    9.85    2.22
  -5  12  -2 1296.92   54.57
   5  12   2 1239.04   53.33
   5  12   2 1280.84   53.82
  -5  12  -3   27.15    4.05
   5  12   3   24.86    3.41
  -5  12  -4  199.87   12.75
   5  12   4  201.10   11.65
   5  12   5  160.44    9.36
   5  12   5  171.79    9.97
  -5 -12  -5  174.82   10.01
  -5  12  -5  156.48   10.59
   5  12   6  658.88   29.04
   5  12   6  683.48   29.42
  -5 -12  -6  696.76   29.63
   5  12   7    1.30    0.77
  -5  13   8  121.75    8.26
  -5  13   7    9.64    2.54
  -5  13   6    3.74    1.94
  -5  13   6    2.93    2.01
  -5  13   5  483.62   24.10
  -5  13   5  468.69   23.60
   5 -13  -4  382.10   19.79
  -5  13   4  353.89   19.35
   5 -13  -3   43.30    5.94
  -5  13   3   47.49    5.20
   5  13  -3   44.90    4.47
  -5  13   2  180.03   11.13
   5 -13  -2  196.74   14.43
   5  13  -2  164.13   10.23
   5  13  -2  181.87   10.48
   5 -13  -1   14.76    5.20
   5  13  -1   13.34    2.35
   5  13  -1   12.73    2.38
   5 -13   0  746.71   41.82
   5  13   0  860.53   36.11
   5  13   0  806.12   35.94
   5  13   1  105.98    7.84
   5  13   1  124.91    8.21
   5  13   2 1003.83   45.10
  -5  13  -2 1115.37   47.13
   5  13   2 1132.77   46.05
  -5  13  -2 1023.16   46.85
   5  13   3    2.17    1.28
  -5  13  -3    2.82    1.83
   5  13   4   51.03    4.70
  -5  13  -4   47.78    5.57
   5  13   5   22.46    2.87
  -5 -13  -5   20.96    2.76
  -5  13  -5   21.74    3.52
   5  13   6  421.88   19.43
  -5 -13  -6  482.30   20.23
  -5  14   8    2.72    1.29
  -5  14   7   83.29    6.72
  -5  14   6   34.43    4.38
  -5  14   6   33.27    4.30
  -5  14   5  253.95   14.46
  -5  14   5  223.38   13.61
   5 -14  -4  166.13   10.81
  -5  14   4  151.65   10.61
   5 -14  -3   13.35    3.44
  -5  14   3   13.76    2.89
   5  14  -3   11.24    2.24
   5 -14  -2 1561.69   63.18
   5  14  -2 1372.59   58.49
   5  14  -2 1380.20   58.41
   5 -14  -1  219.90   17.04
   5  14  -1  253.86   13.49
   5  14  -1  251.79   13.33
   5 -14   0   -0.67    4.07
   5  14   0    6.34    1.69
   5  14   0    0.48    1.00
   5  14   1  378.96   18.35
   5 -14   1  320.13   22.88
  -5  14  -2  106.65    8.72
   5  14   2  105.56    7.52
   5  14   2   99.22    7.03
   5 -14   2   96.43   10.50
  -5  14  -3  488.38   25.38
   5  14   3  513.63   23.40
  -5  14  -4 1373.01   59.25
   5  14   4 1377.12   56.78
  -5  14  -5    6.23    2.07
   5  14   5    6.06    1.52
  -5 -14  -6  142.55    7.54
  -5  15   7  267.22   13.82
  -5  15   6  592.25   28.02
  -5  15   6  631.15   28.20
  -5  15   5   38.37    4.46
  -5  15   5   42.69    4.84
   5 -15  -4    1.66    1.78
  -5  15   4    1.90    1.36
  -5  15   3  103.87    8.01
   5 -15  -3  110.81    8.39
   5  15  -3   96.78    6.82
   5  15  -3   99.83    6.83
   5 -15  -2   30.04    4.89
   5  15  -2   37.80    3.88
   5  15  -2   27.10    3.36
   5 -15  -1    5.35    3.01
   5  15  -1    6.45    1.81
   5  15  -1    6.90    1.85
   5 -15   0  973.37   46.32
   5  15   0  897.65   39.89
   5  15   0  949.75   40.11
   5  15   1    7.68    1.98
   5 -15   1    8.02    4.59
  -5  15  -2  926.38   42.54
  -5  15  -3   45.57    5.61
   5  15   3   46.80    4.20
   5  15   4    1.39    0.99
  -5  15  -4    6.26    2.38
  -5  15  -5   13.09    2.67
  -5  16   7   18.76    2.38
  -5  16   6   -0.20    1.16
  -5  16   6    0.42    0.93
  -5  16   5   10.93    2.28
  -5  16   4  188.41   11.51
  -5  16   3  593.01   29.01
   5 -16  -3  668.15   29.18
   5  16  -3  641.51   27.77
   5  16  -3  615.99   27.58
   5 -16  -2  665.46   30.26
   5  16  -2  648.61   28.36
   5  16  -2  608.47   28.01
   5 -16  -1  172.76   12.08
   5  16  -1  168.95    9.73
   5  16  -1  157.10    9.46
   5  16   0  113.91    7.58
   5 -16   0  109.19    9.93
   5  16   1  531.44   23.96
   5 -16   1  496.88   27.63
  -5  16  -2  239.64   14.95
  -5  16  -3  105.64    8.47
   5  16   3   87.29    5.92
  -5  16  -4  629.30   29.46
  -5 -16  -5  350.45   15.42
  -5  17   6   20.98    2.44
  -5  17   5   48.40    4.34
  -5  17   4  445.95   21.17
  -5  17   3   13.71    2.51
   5  17  -3   14.06    2.16
   5 -17  -3   14.24    2.69
   5  17  -2  230.80   11.87
   5 -17  -2  230.76   12.87
  -5  17   1    3.50    1.99
   5  17  -1    3.85    1.40
   5  17  -1    1.87    1.20
   5 -17  -1    4.85    2.40
   5  17   0  352.83   16.83
   5 -17   0  350.94   18.76
   5  17   1    1.87    1.24
  -5  17  -2  477.87   24.05
  -5  17  -2  565.69   25.86
  -5  17  -3   21.97    3.58
  -5  17  -4   81.33    6.19
  -5  18   5  171.09    8.96
  -5  18   4  277.67   13.48
   5  18  -4  267.59   12.73
   5  18  -3    6.17    1.34
   5 -18  -2  108.75    7.14
   5  18  -2  114.40    6.76
   5  18  -2  109.37    6.65
  -5  18   1  169.58   10.10
   5  18  -1  161.07    8.90
  -5  18   0  372.84   18.72
   5  18   0  378.50   17.32
  -5  18  -1  269.74   14.43
   5  18   1  271.72   13.04
  -5  18  -2  411.92   19.47
  -5  18  -3  325.44   15.92
   5  19  -3   49.83    3.54
   5  19  -3   46.28    3.37
   5  19  -2   10.65    1.64
   5  19  -2    9.35    1.57
   5  19  -1    5.84    1.34
  -5  19   0  539.55   22.90
   5  19   0  478.05   21.50
  -5  19  -1    0.18    0.92
   6   0 -11    0.23    1.20
   6   0 -10  385.37   20.30
   6   0 -10  403.91   20.37
   6   0  -9    0.43    1.75
   6   0  -9    0.70    1.88
   6   0  -9    1.06    1.18
   6   0  -8 1489.63   61.40
   6   0  -8 1316.22   58.99
   6   0  -8 1362.03   57.67
   6   0  -7    1.63    1.93
   6   0  -7   -0.91    2.17
   6   0  -7   -0.30    1.34
   6   0  -6   46.19    7.89
   6   0  -6   63.44    5.57
   6   0  -5    0.68    1.62
   6   0  -4  150.56   13.17
   6   0  -3    0.73    2.30
   6   0  -2 3815.47  156.95
   6   0  -2 3633.65  161.37
  -6   0   1    0.31    1.12
   6   0  -1   -0.64    2.30
  -6   0   0    2.25    1.61
  -6   0   0    2.32    1.84
  -6   0  -1   -0.43    1.15
  -6   0  -1   -0.56    1.33
  -6   0  -2  562.71   29.02
  -6   0  -2  495.75   33.79
  -6   0  -2  604.62   33.32
  -6   0  -3   -0.99    2.35
  -6   0  -3   -2.09    3.93
  -6   0  -4  759.10   35.54
  -6   0  -4  805.20   37.74
  -6   0  -4  903.89   38.12
  -6   0  -4  965.90   53.02
  -6   0  -5    0.79    1.04
  -6   0  -5    0.42    1.79
  -6   0  -5    3.28    1.94
  -6   0  -6 1160.99   53.38
  -6   0  -6 1198.30   52.36
  -6   0  -7    0.72    1.48
   6   0   8    5.41    2.07
   6   0   8    6.07    2.09
   6  -1 -11  114.36    8.10
   6   1 -11  101.85    7.27
   6  -1 -11  107.38    7.36
   6   1 -10   65.67    6.24
   6   1 -10   56.80    5.90
   6  -1 -10   58.52    5.89
   6  -1  -9  103.55    9.01
   6  -1  -9  109.91    8.47
   6  -1  -9   88.87    7.14
   6   1  -9  102.61    8.61
   6  -1  -8   11.51    3.22
   6   1  -8   10.70    2.99
   6   1  -8   15.08    2.74
   6  -1  -7  673.48   31.36
   6   1  -7  652.79   28.50
   6   1  -7  590.21   29.61
   6  -1  -7  613.65   29.16
   6  -1  -6 1643.76   73.98
   6   1  -6 1662.96   79.06
   6  -1  -6 1716.92   78.57
   6   1  -6 1734.28   70.76
   6   1  -5  330.14   23.23
   6   1  -5  348.93   23.46
   6  -1  -5  382.51   23.59
   6  -1  -4 1864.54   78.59
   6   1  -4 1678.76   76.38
   6  -1  -4 1601.13   75.60
   6  -1  -3  199.06   16.79
   6  -1  -3  207.06   17.97
   6   1  -3  232.72   17.57
   6   1  -2   32.59    6.25
   6  -1  -2   31.87    6.40
   6  -1  -2   15.50    6.89
   6   1  -2   30.17    6.81
  -6   1   2   31.39    4.81
  -6  -1   1  313.48   17.16
  -6   1   1  334.04   17.38
   6   1  -1  340.61   21.49
  -6  -1   0  696.23   33.15
  -6   1   0  704.66   32.96
  -6   1   0  654.18   34.81
  -6  -1  -1  113.55    9.74
  -6   1  -1  112.42    9.37
  -6  -1  -1   96.97   10.02
  -6   1  -1  106.69   10.64
  -6  -1  -2  211.02   14.88
  -6   1  -2  210.94   14.40
  -6  -1  -2  198.65   18.72
  -6   1  -2  161.79   16.96
  -6   1  -2  234.66   17.91
  -6  -1  -2  224.98   17.61
  -6  -1  -3    2.12    2.53
  -6   1  -3    2.99    2.91
  -6  -1  -3    5.01    3.37
  -6   1  -3    2.01    2.08
  -6  -1  -4    5.08    2.04
  -6   1  -4    5.43    2.20
   6   1   4    3.99    1.87
  -6   1  -4    7.21    2.48
  -6  -1  -4    6.90    2.19
  -6   1  -4    3.62    1.49
  -6  -1  -4   10.28    2.22
  -6   1  -4    3.96    3.52
  -6  -1  -4   10.07    4.50
  -6  -1  -5   68.38    6.35
  -6   1  -5   69.48    7.69
  -6  -1  -5   68.85    7.03
  -6   1  -5   83.91    7.78
  -6  -1  -6   59.38    6.84
  -6   1  -6   65.17    6.93
  -6  -1  -6   62.32    6.37
  -6   1  -7   68.63    6.93
  -6  -1  -7   65.51    6.35
   6   1   8  116.12    8.24
   6  -1   8  110.67    8.37
   6   1   8  119.47    8.27
   6  -2 -11    6.86    2.08
   6   2 -11    5.51    1.74
   6  -2 -11    7.30    1.93
   6   2 -10  205.13   13.25
   6  -2 -10  236.27   13.47
   6   2 -10  232.19   13.69
   6   2  -9    3.78    1.97
   6  -2  -9    5.72    2.05
   6   2  -9    4.62    2.30
   6  -2  -9    5.30    2.33
   6   2  -8 1262.78   56.74
   6  -2  -8 1333.79   57.46
   6   2  -7    1.39    1.49
   6  -2  -7    3.00    1.73
   6  -2  -6  549.93   30.49
   6   2  -6  619.67   36.33
   6  -2  -6  643.90   35.23
   6   2  -6  603.87   28.39
   6  -2  -5  263.14   20.67
   6   2  -5  228.38   19.18
   6   2  -5  238.68   18.85
   6  -2  -5  253.16   18.34
   6  -2  -4 2085.80   88.84
   6   2  -4 2022.23   88.53
   6   2  -4 1876.18   86.26
   6  -2  -4 1881.92   85.56
   6  -2  -3  337.30   23.94
   6   2  -3  402.59   24.14
  -6   2   3  358.24   21.30
   6  -2  -2  532.68   39.31
   6   2  -2  486.92   29.87
  -6   2   2  521.62   27.66
  -6  -2   1  628.36   29.82
   6   2  -1  704.75   34.24
   6  -2  -1  583.37   34.36
  -6   2   1  663.88   33.17
  -6  -2   0 3412.80  139.64
  -6  -2  -1  144.13   12.00
  -6   2  -1  156.15   13.67
  -6  -2  -2  795.54   39.38
  -6   2  -2  662.51   41.52
  -6   2  -2  728.46   41.44
  -6   2  -3  206.84   19.21
  -6  -2  -3  253.19   21.58
  -6   2  -3  203.36   19.54
  -6  -2  -3  225.60   20.35
  -6   2  -4  163.45   11.42
   6   2   4  163.47   10.68
  -6  -2  -4  134.16    9.46
  -6  -2  -4  135.48    9.67
  -6   2  -4  127.17   10.39
  -6  -2  -4  183.14   19.32
  -6   2  -4  154.77   18.84
  -6  -2  -5   15.96    3.13
  -6  -2  -5   18.43    3.38
  -6   2  -5   23.02    4.28
   6   2   5   12.81    3.01
  -6   2  -6   19.03    4.03
  -6  -2  -6   16.69    3.29
  -6  -2  -6   11.80    2.94
  -6  -2  -6   12.11    3.04
  -6  -2  -7    7.64    2.50
  -6  -2  -7    7.76    2.27
   6  -2   8   98.36    7.72
   6   2   8   86.57    6.75
   6   2   8   86.45    6.82
   6   3 -11  164.18    9.97
   6  -3 -11  188.28   10.21
   6  -3 -11  200.42   11.44
   6   3 -10  867.32   39.85
   6   3 -10  833.50   39.47
   6  -3 -10  963.50   39.72
   6   3  -9  108.69    9.38
   6  -3  -9  115.25    9.39
   6   3  -9  107.62    9.18
   6  -3  -9  126.18    9.15
   6  -3  -8  504.21   25.44
   6   3  -8  471.15   25.41
   6   3  -7   89.76    8.23
   6  -3  -7  105.75    7.68
   6  -3  -7  106.70    8.67
   6   3  -6  877.27   49.77
   6  -3  -6  906.50   47.57
   6  -3  -6  923.26   41.13
   6   3  -6  910.92   41.59
   6  -3  -5   95.61   11.98
   6   3  -5   86.83   11.33
   6   3  -5   92.24   11.07
   6  -3  -5   73.72    9.21
   6  -3  -4 6987.47  276.13
   6   3  -4 7243.69  276.80
   6   3  -4 6167.57  272.69
   6  -3  -4 6804.96  272.56
  -6   3   4 6920.17  272.61
   6  -3  -3  353.47   24.61
   6   3  -3  361.12   22.97
  -6   3   3  355.47   21.93
   6  -3  -2    0.77    2.60
   6   3  -2    1.21    2.28
  -6   3   2    3.35    2.30
  -6  -3   1  156.26   11.34
   6  -3  -1  155.59   14.25
   6   3  -1  127.28   13.43
  -6   3   1  157.27   13.25
  -6  -3   0  403.13   23.21
   6   3   0  424.30   23.97
   6  -3   0  384.90   22.86
  -6  -3  -1   97.29    9.89
  -6   3  -1   66.20    9.04
  -6  -3  -2  171.61   15.50
  -6   3  -2  191.29   17.27
  -6  -3  -3    1.04    3.02
  -6   3  -3   -1.05    2.17
  -6   3  -3    0.89    2.60
  -6  -3  -4   66.09    6.41
  -6  -3  -4   65.99    5.99
  -6   3  -4   73.21    7.53
   6   3   4   67.98    6.39
  -6  -3  -5   11.07    2.96
  -6  -3  -5    6.96    2.25
  -6   3  -5    8.24    3.17
   6   3   5    7.73    2.28
  -6   3  -6    8.11    3.14
  -6  -3  -6    3.88    2.18
  -6  -3  -6    6.67    2.32
  -6  -3  -7   48.75    5.44
   6   3   7   52.92    5.53
   6   3   8  517.08   24.36
   6   3   8  517.80   24.17
   6  -3   8  555.69   26.14
   6  -4 -11    2.54    1.54
   6   4 -10  414.86   21.30
   6  -4  -9   12.75    3.20
   6   4  -9   12.52    3.17
   6   4  -9   15.97    3.75
   6  -4  -8  991.25   44.72
   6  -4  -8 1080.79   45.81
   6  -4  -7   23.16    4.15
   6   4  -7   25.18    4.27
   6  -4  -7   32.88    4.11
   6  -4  -7   31.92    4.56
   6  -4  -6  238.09   12.37
   6  -4  -6  212.43   20.96
   6  -4  -6  198.85   12.79
   6   4  -6  199.70   13.24
   6  -4  -5   85.74   11.55
  -6   4   5   81.48    9.84
   6   4  -5   95.22   12.35
   6  -4  -4   17.87    5.09
  -6   4   4   21.37    4.82
   6   4  -4   29.18    6.23
  -6   4   3  334.17   22.15
   6  -4  -3  355.87   24.88
   6  -4  -2 3643.31  159.36
  -6   4   2 3762.30  156.80
   6   4  -2 3854.37  155.41
  -6  -4   1  459.75   24.63
  -6   4   1  428.06   26.38
   6   4  -1  434.37   26.55
   6  -4   0  557.32   30.30
  -6  -4   0  572.30   30.87
  -6   4  -1  488.03   31.52
  -6  -4  -1  609.69   32.43
  -6   4  -2  159.77   15.94
  -6  -4  -2  165.60   15.31
  -6   4  -3  696.73   44.50
   6   4   3  765.88   33.84
  -6   4  -4  152.83   11.90
   6   4   4  173.83   10.68
  -6  -4  -5  138.07    9.31
  -6   4  -5  155.40   12.37
   6   4   5  137.57    9.64
   6   4   6  139.95    9.37
  -6  -4  -6  131.78    9.02
  -6  -4  -7  115.47    8.41
   6   4   7  119.29    8.40
   6   4   8   11.05    2.30
   6  -5 -11    6.65    1.93
   6   5 -10    1.51    1.61
   6   5  -9   35.24    5.04
   6  -5  -9   31.35    4.63
   6   5  -8  162.12   11.88
   6  -5  -8  168.04   12.25
   6  -5  -8  164.05   10.75
   6  -5  -8  136.56   10.67
   6  -5  -8  157.23   11.60
   6  -5  -7   16.31    3.02
   6  -5  -7   16.19    3.35
   6  -5  -7   16.98    3.64
   6   5  -7   13.11    3.26
   6  -5  -6 3075.65  135.46
   6   5  -6 3357.55  136.23
   6  -5  -6 3599.83  134.71
   6  -5  -6 3502.76  151.07
   6  -5  -5  136.36   14.93
  -6   5   5  109.01   12.51
   6   5  -5  142.15   15.61
   6  -5  -4   71.38   10.09
  -6   5   4   49.29    7.84
   6   5  -4   72.88   10.05
   6  -5  -3   31.07    6.75
  -6   5   3   25.18    5.68
   6   5  -3   31.98    5.97
   6  -5  -2  329.20   23.55
  -6   5   2  295.19   21.61
   6   5  -2  307.29   19.60
  -6  -5   1    7.39    2.74
  -6   5   1    4.35    2.60
   6  -5  -1    2.38    2.01
   6  -5  -1    6.00    1.91
   6   5  -1    4.96    2.71
   6  -5   0 1813.94   82.41
   6  -5   0 1829.00   78.53
  -6  -5   0 2014.83   83.79
  -6  -5  -1   36.90    6.89
   6  -5   1   56.98    8.10
   6  -5   1   51.27    5.87
  -6   5  -1   37.32    7.24
  -6  -5  -2  321.95   23.14
  -6   5  -2  255.51   22.21
   6  -5   2  333.47   22.89
  -6   5  -3   33.07    7.83
   6   5   3   36.62    4.13
   6   5   3   48.74    4.70
   6   5   4   32.92    4.12
   6   5   4   38.13    4.46
  -6  -5  -4   35.64    4.73
   6   5   5    3.41    2.39
   6   5   5    0.31    1.17
  -6  -5  -5   -0.45    1.95
   6   5   6  106.00    8.05
   6   5   6  125.11    8.70
  -6  -5  -6  117.87    8.33
  -6  -5  -6   97.56    9.10
   6   5   7    0.52    1.37
   6   5   7    0.27    1.31
  -6  -5  -7   -0.26    1.32
   6   5   8   25.74    3.08
   6   6 -10  401.89   20.00
   6  -6 -10  412.57   20.66
   6  -6  -9    6.77    2.58
   6  -6  -9    4.48    2.18
   6   6  -9    6.23    2.52
   6  -6  -8 1215.87   54.76
   6  -6  -8 1105.65   52.80
   6  -6  -8 1201.37   54.20
   6  -6  -7    7.88    2.39
   6  -6  -7    9.84    2.70
   6  -6  -7   10.57    3.07
   6  -6  -6  294.98   17.17
   6  -6  -6  313.02   16.23
   6  -6  -6  325.11   27.41
   6  -6  -5  166.80   17.69
   6  -6  -5  183.50   10.26
  -6   6   5  155.44   15.90
   6   6  -5  150.47   16.91
   6  -6  -4  417.82   29.97
  -6   6   4  452.49   29.98
   6  -6  -3  371.40   26.62
  -6   6   3  362.06   26.06
   6   6  -3  387.22   24.10
  -6   6   2 2080.23   94.02
   6  -6  -2 1991.39   93.09
  -6   6   1  665.25   40.56
   6  -6  -1  747.44   35.04
   6  -6  -1  686.25   39.05
   6  -6   0  160.41   11.83
   6  -6   0  178.01   15.12
  -6  -6   0  194.24   15.19
  -6  -6  -1  304.48   20.90
   6  -6   1  241.63   15.97
   6  -6   1  290.28   20.45
  -6   6  -1  218.06   19.58
  -6   6  -2    3.93    2.63
   6  -6   2   10.87    4.23
   6   6   3  342.18   17.29
   6   6   3  306.05   16.41
   6   6   3  348.75   16.98
  -6   6  -3  280.86   25.74
   6  -6   3  346.57   25.14
   6   6   4    2.70    1.73
   6   6   4    2.27    1.52
  -6   6  -4    3.32    1.58
  -6  -6  -4    1.66    1.53
   6   6   5  678.74   32.48
   6   6   5  758.46   33.32
  -6  -6  -5  740.77   35.52
   6   6   6  197.67   11.79
   6   6   6  197.19   11.95
  -6  -6  -6  200.94   13.35
  -6  -6  -7   68.04    5.70
   6   6   7   73.30    5.83
   6   6   7   75.56    6.01
   6   6   8   16.97    2.29
   6  -7 -10  849.60   37.27
   6  -7 -10  826.29   36.85
   6  -7  -9   43.60    5.09
   6  -7  -9   39.23    5.27
   6  -7  -8  647.24   31.20
   6  -7  -8  664.34   32.69
   6  -7  -7  135.69   10.58
   6  -7  -7  135.52   10.16
   6  -7  -7  143.02    9.84
   6  -7  -6  494.76   23.46
   6  -7  -6  463.23   24.32
   6  -7  -5   22.37    6.50
   6  -7  -5   23.65    3.21
   6  -7  -5   16.41    3.23
  -6   7   5   12.57    4.72
  -6   7   4 3360.98  150.29
   6   7  -4 3516.64  147.74
   6  -7  -4 3428.88  149.15
  -6   7   3   -1.07    2.53
   6   7  -3    1.33    1.78
   6  -7  -3    1.81    2.40
  -6   7   2    5.45    3.68
   6  -7  -2    7.10    3.67
  -6   7   1    4.99    3.36
   6  -7  -1    1.62    2.56
   6  -7  -1    3.23    1.60
   6  -7  -1    5.09    3.50
  -6  -7   1    5.21    2.76
   6  -7   0  139.13   10.95
   6  -7   0  124.61   13.40
  -6  -7   0  151.06   13.13
   6  -7   1   76.76    8.07
   6  -7   1   78.93   10.39
  -6  -7  -1   92.02   10.44
  -6  -7  -2  680.61   36.29
   6   7   2  599.12   26.44
   6  -7   2  565.79   30.75
   6  -7   2  616.68   36.11
   6   7   3  113.56    7.82
   6   7   3  120.82    8.22
  -6   7  -4   23.07    3.44
  -6  -7  -4   20.85    3.49
   6   7   4   20.21    3.20
  -6  -7  -5   16.67    3.67
   6   7   5   18.02    3.16
  -6  -7  -6   31.58    4.58
   6   7   6   36.88    4.19
  -6  -7  -7    2.80    1.31
   6   7   7    3.29    1.36
   6  -7   8  560.39   29.82
   6  -8 -10  108.43    7.61
   6  -8 -10   94.38    7.11
   6  -8  -9    8.91    2.63
   6  -8  -8 1053.31   48.12
   6  -8  -7    6.43    2.76
   6  -8  -6  833.66   36.90
   6  -8  -6  801.78   37.88
   6  -8  -5   24.62    3.40
   6  -8  -5   19.20    3.49
   6  -8  -5   24.66    6.72
   6   8  -4 1109.70   55.10
  -6   8   4 1158.77   61.53
  -6   8   4 1087.96   45.96
  -6   8   3  323.92   27.25
   6  -8  -3  248.74   21.38
   6  -8  -2  803.73   49.42
   6  -8  -2  820.23   46.54
   6  -8  -1  217.59   14.80
  -6   8   1  227.07   22.17
   6  -8  -1  223.97   19.81
   6  -8   0 1790.91   83.69
   6  -8   0 1858.61   90.40
   6   8   1  584.37   26.48
  -6  -8  -1  634.02   33.50
   6  -8   1  487.48   29.33
   6  -8   1  553.42   34.95
   6   8   1  549.36   25.38
  -6   8  -1  607.71   25.55
   6  -8   2  384.10   25.01
   6  -8   2  449.53   30.42
   6   8   2  420.18   20.54
   6   8   2  405.30   27.91
   6   8   3  405.99   19.95
   6   8   3  398.85   20.28
  -6   8  -3  440.31   20.93
   6   8   4   65.20    5.89
   6   8   4   68.40    6.23
   6   8   5   45.38    4.72
  -6  -8  -5   43.84    5.42
  -6   8  -5   37.22    4.54
  -6  -8  -6   28.51    4.02
   6   8   6   32.71    3.84
  -6  -8  -7  116.31    7.44
   6   8   7  117.26    7.44
   6  -9 -10   59.10    5.02
   6  -9 -10   59.39    5.13
   6  -9  -9  102.64    8.19
   6  -9  -8   12.94    3.26
  -6   9   7  221.31   13.69
   6  -9  -7  222.35   14.28
   6  -9  -6 2243.52   93.20
   6  -9  -5  185.48   11.36
  -6   9   5  183.43   11.56
   6  -9  -5  194.62   12.18
  -6   9   4 1174.35   51.10
   6  -9  -4 1174.05   62.35
   6  -9  -3  485.12   27.97
  -6   9   3  440.13   21.58
  -6   9   3  517.19   39.39
   6  -9  -2  514.52   31.03
  -6   9   2  533.10   41.76
   6  -9  -2  494.15   37.07
  -6   9   2  521.92   23.88
  -6   9   1  204.66   11.04
   6  -9  -1  166.75   18.66
   6   9  -1  186.87   10.89
   6   9   0  549.58   24.86
   6   9   0  545.37   24.58
  -6   9   0  572.41   24.85
  -6  -9   0  596.99   31.81
   6  -9   0  473.38   34.15
   6  -9   0  447.39   28.32
   6   9   0  531.77   24.77
  -6  -9  -1  265.05   19.15
   6   9   1  229.94   12.70
  -6   9  -1  243.72   12.95
   6   9   1  250.28   13.53
   6  -9   1  200.90   16.46
   6  -9   1  223.03   21.05
   6   9   2  207.60   12.12
  -6   9  -2  224.77   12.78
   6   9   2  222.91   13.17
  -6   9  -3    7.11    1.98
   6   9   3    6.99    2.04
   6   9   4   23.23    3.32
  -6   9  -4   28.16    3.83
  -6   9  -5   52.70    5.55
  -6  -9  -5   67.37    5.91
   6   9   5   66.85    5.63
  -6  -9  -6   35.63    4.21
   6   9   6   41.32    4.15
  -6  -9  -7  175.76    9.55
   6   9   7  194.73    9.83
   6 -10  -9    7.64    2.34
  -6  10   8  957.08   44.06
   6 -10  -8 1022.89   44.82
  -6  10   7   11.43    2.92
   6 -10  -7   10.96    3.05
   6 -10  -6   67.79    6.80
   6 -10  -5   42.67    5.34
  -6  10   5   43.70    4.97
   6 -10  -4   34.38    5.25
  -6  10   4   32.24    4.12
   6 -10  -3    7.66    3.91
  -6  10   3    8.25    2.13
   6 -10  -2 3177.06  149.34
  -6  10   2 3382.92  129.23
  -6  10   2 3206.48  128.92
   6 -10  -2 3133.74  137.31
   6  10  -2 3160.57  128.63
  -6  10   1  246.75   13.09
   6  10  -1  224.19   12.60
   6  10  -1  249.87   13.15
  -6  10   0   23.54    3.28
   6  10   0   26.47    3.36
   6 -10   0   28.17    5.46
  -6 -10   0   39.28    6.69
   6 -10   0   24.25    6.99
   6  10   0   23.31    3.29
  -6 -10  -1   11.87    3.87
  -6  10  -1   14.16    2.62
   6 -10   1    4.78    3.78
   6  10   1   17.66    3.07
   6  10   1    8.32    2.01
   6  10   2  669.10   31.22
   6  10   2  642.91   30.40
  -6  10  -2  736.24   31.64
   6  10   3    1.87    1.23
  -6  10  -3    1.56    1.23
   6  10   4  201.68   11.75
   6  10   4  210.00   12.28
  -6  10  -4  222.82   13.10
   6  10   5  275.40   14.83
  -6 -10  -5  308.79   15.45
  -6  10  -5  267.71   15.73
   6  10   5  313.87   15.59
  -6 -10  -6  212.34   11.82
   6  10   6  218.93   11.55
  -6 -10  -7   16.11    2.09
   6  10   7   18.05    2.19
   6 -11  -9  287.35   15.17
   6 -11  -9  307.22   15.27
   6 -11  -8   19.29    3.49
  -6  11   8   22.62    3.67
   6 -11  -7  490.63   25.38
  -6  11   7  486.36   24.56
  -6  11   6  766.23   35.21
   6 -11  -5  334.22   18.00
  -6  11   5  303.73   17.35
   6 -11  -4  908.95   39.39
  -6  11   4  771.11   36.77
   6 -11  -3  226.15   15.74
  -6  11   3  181.28   11.45
  -6  11   2    1.90    1.41
  -6  11   2    2.06    1.44
   6  11  -2    2.89    1.41
  -6  11   1   62.62    5.67
   6 -11  -1   70.85    9.54
   6  11  -1   71.95    5.78
   6  11  -1   70.90    5.84
   6  11   0  722.20   32.18
   6  11   0  738.72   32.23
  -6  11   0  696.89   32.30
   6  11   1   83.93    6.78
   6  11   1   82.56    6.33
  -6  11  -1   84.83    6.76
   6  11   2  134.43    9.05
   6  11   2  117.81    8.30
  -6  11  -2  130.60    9.17
   6  11   3  217.98   12.61
  -6  11  -3  226.35   13.53
   6  11   4    1.02    0.96
  -6  11  -4    0.98    1.34
   6  11   5   33.75    3.56
   6  11   5   36.04    3.90
   6  11   6   11.73    1.89
  -6 -11  -6    9.22    1.88
  -6  11  -6    5.80    1.77
   6  11   7    7.83    1.34
   6 -12  -9   44.09    4.10
   6 -12  -9   59.89    4.55
  -6  12   8  663.40   30.14
   6 -12  -8  637.28   29.58
   6 -12  -7    3.43    2.12
  -6  12   7    2.60    1.64
  -6  12   6  436.90   22.03
  -6  12   6  399.85   21.28
   6 -12  -5   15.96    3.41
  -6  12   5   13.93    3.16
  -6  12   5   15.43    2.89
   6 -12  -4  828.72   37.78
  -6  12   4  780.39   36.36
   6 -12  -3   23.70    4.92
  -6  12   3   29.08    4.00
  -6  12   2  269.40   14.81
   6 -12  -2  261.23   19.30
   6  12  -2  276.33   14.46
   6  12  -2  268.90   14.18
   6 -12  -1  587.87   35.48
   6  12  -1  641.84   29.31
   6  12  -1  673.63   29.33
   6  12   0 1288.06   50.80
  -6  12   0 1103.20   50.73
   6 -12   0 1159.86   56.97
   6  12   1    2.43    1.37
   6  12   1    2.33    1.27
  -6  12  -1    2.63    1.52
   6  12   2  541.59   25.39
   6  12   2  528.81   24.85
  -6  12  -2  537.19   26.09
   6  12   3   14.05    2.54
  -6  12  -3   13.10    2.84
  -6  12  -4  226.14   13.53
   6  12   4  214.92   12.12
  -6  12  -5  122.69    8.98
   6  12   5  160.15    8.83
  -6 -12  -6   25.40    2.67
  -6  12  -6   18.65    2.76
   6  12   6   19.20    2.23
  -6  13   8  256.60   13.42
   6 -13  -8  233.80   12.66
   6 -13  -7   64.11    6.00
  -6  13   7   72.78    6.43
  -6  13   6  388.68   20.36
  -6  13   6  387.74   20.09
  -6  13   5  117.55    8.90
  -6  13   5  114.77    8.57
   6 -13  -4 1714.76   68.76
  -6  13   4 1522.83   67.80
   6 -13  -3  170.52   12.42
  -6  13   3  158.92   10.69
  -6  13   2   21.27    3.40
   6  13  -2   20.98    3.07
   6  13  -2   20.43    2.93
   6  13  -1  286.37   14.67
   6  13  -1  271.74   14.25
   6  13   0   82.48    6.45
   6 -13   0   78.76   10.63
   6  13   1    6.37    1.88
  -6  13  -2  349.05   19.19
   6  13   2  364.50   18.15
   6  13   2  341.81   17.57
  -6  13  -2  371.15   19.24
  -6  13  -3  119.38    9.09
   6  13   3  109.46    7.56
  -6  13  -3  113.80    8.84
  -6  13  -4   41.53    4.97
   6  13   4   34.48    3.69
  -6  13  -5   24.05    3.47
  -6 -13  -5   23.69    2.85
  -6 -13  -6   23.47    2.37
  -6  13  -6   19.69    2.66
  -6  14   8  758.43   32.55
  -6  14   7   64.06    5.72
  -6  14   6  173.27   11.05
  -6  14   6  174.16   10.98
  -6  14   5  110.77    8.49
  -6  14   5  104.81    7.99
   6 -14  -4  143.61   10.08
  -6  14   4  149.48   10.27
   6 -14  -3  248.30   15.14
  -6  14   3  237.31   14.10
   6 -14  -2 1695.76   73.51
   6  14  -2 1696.00   69.06
   6  14  -2 1656.69   68.77
   6  14  -1    3.25    1.56
   6 -14  -1    3.12    3.48
   6  14   0   45.24    4.58
   6 -14   0   41.26    7.93
   6  14   1  341.38   17.26
   6 -14   1  324.30   23.12
  -6  14  -2   83.44    7.65
   6  14   2   83.22    6.10
   6 -14   2   70.24    9.39
  -6  14  -3  437.83   21.96
   6  14   3  393.40   19.22
  -6  14  -4  148.90   10.24
  -6 -14  -5    0.87    0.86
  -6  14  -5    1.49    1.22
  -6  15   7   41.97    4.07
  -6  15   6 1464.73   63.29
  -6  15   6 1595.29   63.62
  -6  15   5   86.37    7.07
   6 -15  -4  108.42    7.95
  -6  15   4  105.65    8.15
   6 -15  -3   10.59    2.82
  -6  15   3   14.36    2.86
   6  15  -3   13.56    2.27
   6  15  -2  258.46   13.78
   6 -15  -2  299.37   17.01
   6  15  -1    3.70    1.43
   6  15  -1    7.01    1.85
   6 -15  -1    6.68    3.67
   6 -15   0  143.49   13.65
   6  15   0  168.49    9.83
   6 -15   1  216.89   17.67
   6  15   1  251.23   13.18
   6 -15   2  319.11   21.83
  -6  15  -2  377.00   20.05
   6 -15   3  196.94   14.65
  -6  15  -3  231.26   13.97
  -6  15  -4   10.48    2.62
  -6 -15  -5    1.42    0.81
  -6  15  -5    1.64    1.22
  -6  16   6  112.33    7.26
  -6  16   6  116.93    7.42
  -6  16   5   67.27    5.71
  -6  16   4  146.35    9.60
  -6  16   3   76.59    6.56
   6  16  -3   77.90    5.55
   6 -16  -3   95.68    7.11
   6  16  -2  626.99   27.35
   6  16  -2  594.13   27.03
   6 -16  -2  639.26   29.47
   6  16  -1  883.09   36.56
   6  16  -1  807.83   36.41
   6 -16  -1  890.47   40.03
   6  16   0  181.16   10.16
   6 -16   0  171.50   13.35
   6  16   1  346.14   16.39
   6 -16   1  305.85   19.98
  -6  16  -2    1.53    1.71
   6 -16   2    2.27    2.96
  -6  16  -3   44.45    5.26
  -6  16  -4    3.79    1.71
  -6  17   6   72.96    4.86
  -6  17   5    6.90    1.71
  -6  17   4  966.01   41.38
   6  17  -4  971.94   40.10
   6  17  -3    4.84    1.44
   6  17  -3    5.00    1.25
   6 -17  -3    3.45    1.73
   6  17  -2   53.87    4.38
   6  17  -2   53.17    4.26
   6 -17  -2   52.03    5.13
   6  17  -1    2.69    1.22
   6  17  -1    1.21    0.99
   6 -17  -1    0.58    1.82
   6  17   0   67.58    5.06
   6 -17   0   72.37    6.83
   6 -17   1  210.84   13.14
  -6  17  -2  103.93    7.33
  -6  17  -3  201.96   11.81
  -6  18   4  167.31    9.36
   6  18  -4  183.98    8.87
   6  18  -3  172.77    8.86
   6  18  -3  183.57    9.18
   6 -18  -2  226.77   11.59
   6  18  -2  208.96   10.73
   6  18  -2  225.59   10.90
   6 -18  -1   14.36    2.55
   6  18  -1   12.94    1.99
  -6  18   1   17.62    2.86
   6 -18   0  319.91   16.02
   6  18   0  318.21   14.95
  -6  18   0  349.91   16.81
  -6  18  -1  447.34   21.13
  -6  18  -2   83.54    5.76
   6  19  -3   55.44    3.69
   6  19  -2  134.69    6.67
   6  19  -2  113.45    6.40
   6  19  -1   57.86    3.90
  -6  19   0  159.86    8.93
   7   0 -11    0.68    1.18
   7   0 -10  406.06   21.04
   7   0 -10  425.48   21.31
   7   0  -9    0.70    1.72
   7   0  -9    0.77    1.99
   7   0  -8  675.71   34.09
   7   0  -8  835.46   36.21
   7   0  -7   -0.32    1.32
   7   0  -7    2.67    2.03
   7   0  -6  133.36    8.40
   7   0  -6  133.22   14.22
   7   0  -6  105.21    8.39
   7   0  -5    1.59    2.49
   7   0  -4  271.29   20.58
   7   0  -4  275.33   20.65
   7   0  -3   -0.87    2.54
   7   0  -2  199.67   20.04
   7   0  -2  237.87   18.99
  -7   0   1    1.59    1.34
   7   0  -1    1.45    2.12
   7   0   0 3507.21  152.38
  -7   0   0 3676.50  147.79
  -7   0  -1   -0.67    1.78
  -7   0  -1    1.63    1.82
  -7   0  -2  102.85   14.00
  -7   0  -2  117.73   13.17
  -7   0  -2  107.28   10.63
  -7   0  -3    1.02    0.96
   7   0   3    1.30    1.44
   7   0   3    2.49    1.65
  -7   0  -3   -1.24    3.62
  -7   0  -3   -1.13    1.91
  -7   0  -3    0.69    1.29
  -7   0  -4   89.21    7.74
  -7   0  -4   70.11    6.33
  -7   0  -5   -0.37    1.40
   7   0   6 2193.63   90.90
   7   0   7    0.97    1.49
   7   0   7    1.55    1.73
   7   0   8  151.16    9.24
   7   0   8  155.02    9.14
   7   0   8  146.65    9.15
   7   1 -11   84.48    6.35
   7  -1 -11   88.90    6.49
   7  -1 -11   86.41    6.75
   7  -1 -10  505.73   23.51
   7  -1 -10  440.32   22.40
   7   1 -10  418.45   22.28
   7   1 -10  442.48   22.54
   7  -1  -9  171.69   12.29
   7  -1  -9  178.22   11.70
   7   1  -9  182.50   12.08
   7   1  -8  124.69    9.68
   7  -1  -8  115.63    9.25
   7   1  -7  443.29   23.14
   7  -1  -7  459.89   23.00
   7  -1  -7  486.34   24.46
   7   1  -6  358.06   26.65
   7  -1  -6  363.60   26.30
   7  -1  -6  380.16   19.89
   7   1  -6  370.79   20.01
   7   1  -5  159.83   15.87
   7   1  -5  181.78   16.37
   7  -1  -5  209.72   17.28
   7   1  -4    2.28    2.02
   7  -1  -4    0.76    1.56
   7  -1  -3  362.63   26.39
   7   1  -3  391.34   26.00
   7  -1  -3  402.20   28.66
   7   1  -2   38.78    7.17
   7  -1  -2   20.04    5.81
   7  -1  -2   35.00    8.80
   7   1  -2   30.09    7.12
  -7  -1   1  149.84   11.20
   7  -1  -1  145.48   14.35
   7   1  -1  167.64   14.48
  -7  -1   0   49.29    6.60
   7  -1   0   65.64    9.59
   7   1   0   56.66    8.20
  -7   1   0   64.92    7.19
  -7   1   0   59.55    7.86
  -7  -1  -1   39.71    6.14
  -7   1  -1   40.83    6.09
  -7   1  -1   32.33    6.26
  -7  -1  -2 1272.17   59.84
  -7  -1  -2 1495.13   69.64
  -7   1  -2 1434.24   65.09
  -7   1  -3    6.58    1.77
  -7  -1  -3    5.99    1.92
   7   1   3    1.33    1.59
   7   1   3    6.30    2.14
  -7  -1  -3    1.93    1.58
  -7  -1  -3    1.25    2.97
  -7   1  -3    3.65    3.54
  -7   1  -3    3.47    2.75
  -7  -1  -3    4.51    3.29
  -7  -1  -4  566.88   27.84
  -7  -1  -4  620.00   28.97
  -7   1  -4  664.04   29.98
  -7  -1  -4  672.70   29.38
   7   1   5   65.58    6.49
  -7  -1  -5   58.33    6.15
  -7  -1  -5   60.37    6.51
  -7  -1  -5   81.48    7.19
   7   1   6   10.35    2.78
   7  -1   7   69.82    6.63
   7   1   7   60.42    6.09
   7   1   7   74.27    6.48
   7   1   8  400.49   18.93
   7  -1   8  395.10   19.28
   7   1   8  403.05   18.83
   7   1   8  393.39   18.82
   7  -1   8  388.68   19.12
   7   2 -11   35.18    3.84
   7  -2 -11   47.57    4.42
   7  -2 -11   44.85    4.69
   7  -2 -10   72.38    6.97
   7   2 -10   72.76    6.67
   7   2 -10   60.87    6.20
   7  -2 -10   86.17    6.91
   7   2  -9   11.14    3.07
   7  -2  -9   16.80    3.57
   7   2  -8  470.62   25.25
   7  -2  -8  539.47   26.52
   7  -2  -7   32.23    4.08
   7   2  -7   27.64    4.26
   7  -2  -7   24.08    4.17
   7  -2  -6  303.78   15.20
   7   2  -6  249.90   21.49
   7  -2  -6  262.97   21.38
   7   2  -6  279.22   15.94
   7   2  -5   52.36    8.77
   7  -2  -5   68.05    9.36
   7   2  -5   51.45    8.53
   7  -2  -4  129.65   14.09
   7   2  -4  107.25   12.01
   7  -2  -4  122.55   12.70
   7  -2  -3   68.18   10.33
   7   2  -3   54.21    8.15
   7  -2  -2  523.91   32.20
   7  -2  -2  450.86   36.13
   7   2  -2  501.98   31.29
  -7   2   2  514.60   28.63
  -7  -2   1   12.22    3.05
   7   2  -1   13.03    3.74
   7  -2  -1    9.92    3.83
   7   2  -1    5.74    3.96
  -7  -2   0   45.18    6.37
   7   2   0   36.19    6.41
   7  -2   0   37.47    7.70
  -7   2   0   47.43    7.27
  -7  -2  -1   59.55    8.05
  -7   2  -1   58.12    8.63
  -7  -2  -2  931.31   46.55
  -7   2  -2  914.71   49.27
  -7  -2  -3  134.14    9.23
   7   2   3  121.98    9.29
   7   2   3  120.06    8.69
  -7  -2  -3  136.02    9.43
  -7  -2  -3  177.92   19.08
  -7   2  -3  125.59   16.03
  -7   2  -3  161.37   17.77
   7   2   4 1300.91   57.09
   7   2   4 1336.71   58.40
  -7  -2  -4 1426.14   58.09
  -7  -2  -4 1331.43   58.06
   7   2   5    9.85    2.74
   7   2   5    2.47    1.74
  -7  -2  -5    5.85    2.10
  -7  -2  -5    6.62    2.46
   7   2   6  593.14   28.50
   7   2   7  166.81   10.45
   7  -2   7  166.55   11.18
   7   2   7  151.86   10.23
   7   2   8  743.93   32.30
   7  -2   8  757.38   33.29
   7   2   8  734.53   32.27
   7   2   8  749.78   32.25
   7  -2   8  764.56   33.25
   7   3 -11   29.72    3.24
   7  -3 -11   26.30    3.69
   7  -3 -10 1308.36   52.37
   7   3 -10 1108.14   50.65
   7  -3 -10 1205.87   50.88
   7   3 -10 1145.79   51.14
   7  -3  -9   93.73    8.34
   7   3  -9   85.09    7.86
   7   3  -8   28.41    4.47
   7  -3  -8   29.22    4.69
   7  -3  -7  154.99    9.99
   7  -3  -7  150.58   11.02
   7   3  -7  134.77   10.42
   7   3  -6   67.70   10.39
   7  -3  -6   78.78   10.49
   7   3  -6   52.71    9.43
   7  -3  -6   73.99    6.78
   7   3  -6   63.99    6.37
   7  -3  -5   66.69   10.51
   7   3  -5   57.55    9.38
   7  -3  -5   65.70    9.24
   7   3  -5   52.92    8.66
   7  -3  -4  989.17   52.41
   7   3  -4  949.82   49.58
   7   3  -4  988.18   49.20
   7  -3  -4  898.72   48.17
   7  -3  -3  394.85   28.52
   7   3  -3  414.31   25.49
  -7   3   3  384.46   24.41
   7  -3  -2  363.77   26.78
   7   3  -2  365.84   24.62
  -7   3   2  428.86   25.33
  -7  -3   1   47.45    6.26
   7   3  -1   47.05    7.04
   7  -3  -1   34.33    7.16
   7   3  -1   26.68    6.65
  -7  -3   0  614.30   33.21
   7  -3   0  545.65   36.71
   7   3   0  622.32   33.55
  -7   3   0  649.51   35.46
  -7  -3  -1    7.86    3.18
  -7   3  -1    2.43    2.56
  -7  -3  -2 1381.48   70.44
  -7   3  -2 1373.54   72.46
  -7   3  -2 1389.47   73.49
   7   3   3   10.46    2.45
   7   3   3    7.98    2.25
  -7  -3  -3    9.29    2.40
  -7   3  -3    6.03    3.53
  -7   3  -3    7.64    4.32
  -7  -3  -3   15.41    5.99
   7   3   4  864.03   39.42
   7   3   4  940.09   40.61
  -7  -3  -4  909.45   39.72
  -7  -3  -4  846.91   40.63
   7   3   5   29.52    4.21
   7   3   5   32.46    4.54
  -7  -3  -5   36.61    4.60
  -7  -3  -5   30.05    4.89
   7   3   6   41.20    4.87
   7   3   6   41.02    4.78
   7  -3   6   37.16    5.37
  -7  -3  -6   34.01    4.41
  -7  -3  -6   22.16    4.23
   7  -3   7   17.08    3.54
   7   3   7   20.35    3.17
   7   3   7   17.51    3.05
   7   3   8  742.42   31.93
   7  -3   8  792.43   33.61
   7   3   8  740.00   32.15
   7  -3   8  789.79   33.73
   7   3   8  726.35   31.94
   7  -4 -11   82.89    6.55
   7   4 -10  256.92   14.78
   7  -4 -10  268.98   15.39
   7  -4  -9    0.38    1.82
   7   4  -9   -0.38    1.67
   7   4  -8  690.54   34.22
   7  -4  -8  735.58   35.03
   7  -4  -8  704.86   34.61
   7  -4  -8  755.83   33.60
   7  -4  -7    0.39    1.74
   7   4  -7    2.91    2.08
   7  -4  -7    2.34    1.55
   7  -4  -7    0.38    1.77
   7  -4  -6   62.66    5.67
   7  -4  -6   67.42   11.76
   7  -4  -6   55.96    6.12
   7   4  -6   75.55    6.78
   7  -4  -5   43.00    8.71
   7   4  -5   41.52    8.02
   7  -4  -4    6.08    4.00
   7   4  -4    3.15    2.49
  -7   4   4    5.95    2.94
   7  -4  -3  197.09   19.12
   7   4  -3  194.96   15.68
  -7   4   3  195.46   16.38
   7  -4  -2  123.40   14.18
   7   4  -2  116.12   11.58
  -7   4   2  107.52   11.87
  -7  -4   1  357.10   21.49
   7   4  -1  319.05   23.11
  -7  -4   0 1284.92   61.01
  -7  -4  -1  939.48   47.46
   7  -4   1  942.43   46.83
   7   4   2    0.25    1.15
   7   4   2    1.49    1.11
  -7  -4  -2    6.25    3.52
  -7   4  -2    2.99    2.90
   7   4   3  538.03   25.33
  -7  -4  -3  453.38   25.56
   7   4   4  286.15   15.94
  -7  -4  -4  266.18   17.02
  -7  -4  -5   38.56    5.70
   7   4   5   49.05    5.24
   7   4   5   49.81    5.24
  -7  -4  -5   38.17    4.71
   7   4   5   41.24    4.69
   7   4   6 1458.84   59.29
   7   4   6 1439.28   59.36
  -7  -4  -6 1399.96   58.89
   7   4   6 1457.09   58.91
   7   4   7   67.96    5.76
   7  -4   8   86.45    6.92
   7   4   8   63.84    4.80
   7   5 -10   99.07    7.55
   7  -5 -10   97.27    7.87
   7  -5  -9    0.37    1.86
   7   5  -9    0.71    1.69
   7  -5  -8  586.18   29.78
   7   5  -8  609.00   29.27
   7  -5  -8  538.32   28.88
   7  -5  -8  629.90   28.64
   7  -5  -7    0.80    1.79
   7   5  -7    1.43    1.81
   7  -5  -7    1.92    1.83
   7  -5  -7    0.30    1.43
   7  -5  -6 1672.07   68.95
   7  -5  -6 1557.61   70.08
   7   5  -6 1740.32   69.99
   7  -5  -5  366.96   28.69
   7   5  -5  403.94   28.17
  -7   5   5  388.48   27.06
   7  -5  -4   71.01   11.20
   7   5  -4   81.45   10.32
  -7   5   4   53.35    8.74
   7  -5  -3   69.14   10.94
  -7   5   3   50.21    8.56
   7  -5  -2   68.84   10.81
   7   5  -2   70.59    8.69
  -7   5   2   67.96    9.74
  -7  -5   1   14.08    3.88
  -7   5   1    7.77    3.58
  -7  -5   0  125.68   12.55
   7  -5   0   99.03   11.28
  -7  -5  -1   63.32    9.34
   7  -5   1   48.57    8.01
  -7   5  -1   47.11    8.53
  -7  -5  -2 1189.00   59.71
   7   5   2 1169.55   48.34
   7   5   2 1135.84   48.31
   7  -5   2 1169.48   59.02
   7   5   3    0.55    1.46
   7   5   3    1.36    1.13
  -7  -5  -3    2.09    1.49
   7   5   4  733.29   34.26
   7   5   4  800.77   34.93
  -7  -5  -4  749.56   36.22
   7   5   5   -0.60    1.60
   7   5   5    1.22    1.45
  -7  -5  -5    0.45    1.69
   7   5   6   61.96    5.71
   7   5   6   55.62    5.42
  -7  -5  -6   57.92    5.41
  -7  -5  -6   56.53    6.56
   7   5   7    5.87    1.81
   7   6 -10   78.01    6.09
   7  -6 -10   73.26    6.49
   7  -6  -9   12.06    3.30
   7  -6  -9   11.55    2.89
   7   6  -9   10.58    2.78
   7   6  -8  879.38   38.52
   7  -6  -8  832.08   39.56
   7  -6  -8  779.07   38.48
   7  -6  -8  867.32   38.16
   7  -6  -8  810.23   40.14
   7  -6  -7   29.70    4.69
   7  -6  -7   27.45    4.49
   7  -6  -7   30.31    4.29
   7  -6  -6  344.44   17.01
   7  -6  -6  279.68   17.44
   7   6  -5   63.16   10.09
  -7   6   5   64.59   10.11
   7  -6  -5   67.09    5.58
   7  -6  -5   49.28   10.13
   7  -6  -4   74.02    7.86
  -7   6   4   52.06    9.24
   7   6  -4   56.53    8.74
   7  -6  -4   56.01   10.36
  -7   6   3  275.73   22.23
   7   6  -3  240.16   18.17
   7  -6  -3  241.46   21.80
  -7   6   2   36.71    7.80
   7  -6  -2   43.02    8.66
  -7   6   1  824.40   50.07
  -7  -6   1 1048.58   48.13
   7  -6   0  574.14   35.76
  -7  -6   0  698.97   36.80
  -7   6  -1  277.92   23.24
  -7  -6  -1  355.44   23.69
   7   6   1  291.58   15.15
   7  -6   1  321.13   23.07
   7  -6   1  238.39   17.71
   7   6   2  210.30   11.82
   7   6   2  206.52   11.47
  -7  -6  -2  229.99   19.59
   7   6   2  185.92   10.95
   7  -6   2  175.63   17.83
   7   6   3  512.06   24.58
   7   6   3  558.39   25.32
   7   6   3  495.01   24.37
   7   6   4  110.16    8.47
   7   6   4  127.32    8.91
  -7   6  -4  131.69    9.09
  -7  -6  -4  148.91   10.63
  -7  -6  -5  146.87   11.08
   7   6   5  137.16    9.46
   7   6   5  137.47    9.32
  -7  -6  -6 1201.72   51.48
   7   6   6 1135.05   49.46
   7   6   6 1181.22   49.80
   7   6   7  161.48    9.18
   7  -7 -10 1284.32   54.49
   7  -7  -9    3.56    2.04
   7  -7  -9    2.27    1.91
   7  -7  -8  214.53   14.24
   7  -7  -8  192.94   13.09
   7  -7  -8  229.85   15.15
   7  -7  -7  137.34   10.88
   7  -7  -7  119.49    9.99
   7  -7  -6   74.25    7.42
   7  -7  -6   75.83    6.58
   7  -7  -5  326.20   16.59
   7  -7  -5  295.56   26.51
   7  -7  -4  440.07   23.47
   7  -7  -4  373.97   29.93
   7   7  -4  400.03   26.72
  -7   7   4  386.25   29.47
  -7   7   4  400.92   19.86
   7  -7  -3   10.66    4.75
  -7   7   3    6.89    3.87
   7  -7  -2  395.56   30.04
  -7   7   2  502.90   34.18
   7  -7  -1    8.11    4.18
  -7   7   1    3.45    3.35
  -7  -7   0  445.07   26.37
   7  -7   0  333.83   26.01
  -7  -7  -1   10.33    3.79
   7  -7   1    6.27    3.40
   7   7   1    5.03    1.65
  -7   7  -1    3.18    3.10
   7   7   2 1089.16   46.44
  -7  -7  -2 1176.37   57.57
   7   7   3    7.00    2.01
   7   7   3    5.56    1.72
   7   7   4  541.13   25.82
   7   7   4  543.57   25.83
  -7  -7  -4  604.61   27.91
  -7   7  -4  520.95   25.97
   7   7   5   41.92    4.65
   7   7   5   48.17    4.89
  -7  -7  -5   43.92    5.59
   7   7   6   59.31    5.26
  -7  -7  -6   59.31    5.82
   7   7   6   68.31    5.58
   7  -7   7   18.66    4.42
   7  -8 -10   18.99    3.03
   7  -8 -10   20.29    3.12
   7  -8  -9    1.77    1.88
   7  -8  -8  712.76   34.62
   7  -8  -8  728.65   35.55
   7  -8  -7    6.96    2.72
   7  -8  -7    4.30    1.98
   7  -8  -6  174.68   12.36
   7  -8  -6  193.82   11.84
  -7   8   5   63.22    6.00
   7  -8  -5   66.05    6.70
   7  -8  -5   73.58    6.10
  -7   8   4  128.11    8.59
   7  -8  -4   91.76   13.42
  -7   8   3  214.59   12.13
  -7   8   3  250.33   24.40
   7  -8  -3  223.29   15.97
  -7   8   2  397.90   18.52
   7  -8  -2  310.53   26.69
  -7   8   2  387.04   18.64
  -7   8   2  397.33   32.90
   7   8  -2  373.48   18.65
   7  -8  -2  366.73   24.21
  -7   8   1   13.65    2.33
   7   8  -1    6.29    1.84
   7  -8  -1    5.28    3.78
   7  -8  -1    9.98    4.83
  -7   8   1    8.32    5.23
   7  -8  -1    7.43    4.01
   7   8  -1    9.66    2.16
  -7   8   0    4.92    1.56
   7   8   0    3.79    1.52
   7  -8   0    3.42    2.04
  -7  -8   0    7.16    3.19
   7  -8   0    7.45    4.05
   7  -8   0    5.16    3.48
   7   8   0    7.76    2.10
  -7   8  -1  391.87   18.41
   7   8   1  357.62   18.04
   7   8   1  367.97   18.95
  -7  -8  -1  425.56   26.19
   7  -8   1  350.22   27.66
   7  -8   1  333.83   22.25
   7  -8   2  221.00   16.90
   7   8   2  254.55   13.67
  -7   8  -3  286.29   15.73
   7   8   3  289.17   15.45
   7   8   3  270.36   14.69
  -7   8  -4 1401.66   59.12
   7   8   4 1378.73   58.25
  -7   8  -5  222.80   13.49
  -7  -8  -5  254.23   14.46
   7   8   5  239.05   13.21
  -7  -8  -6  498.39   22.73
   7   8   6  496.69   22.08
  -7  -8  -7   25.95    2.74
   7  -8   7   23.84    4.77
   7  -9 -10  339.17   17.34
   7  -9 -10  387.14   17.58
   7  -9  -9  186.75   11.87
  -7   9   8  108.92    8.81
   7  -9  -8  129.62   10.28
   7  -9  -7  204.55   13.57
   7  -9  -6  320.19   17.76
   7  -9  -6  347.30   19.02
   7  -9  -5   43.81    4.78
  -7   9   5   41.49    4.91
   7  -9  -5   40.32    5.11
  -7   9   4   43.12    4.68
  -7   9   3  847.98   36.48
   7  -9  -3  726.13   46.50
  -7   9   2   73.09    5.99
  -7   9   2   80.00    6.28
   7  -9  -2   66.90   10.49
  -7   9   2   90.16   16.17
   7   9  -1   22.49    3.21
  -7   9   1   27.15    3.46
   7  -9  -1   23.13    7.58
   7   9  -1   21.72    3.22
   7   9   0    7.19    2.12
  -7   9   0   11.40    2.34
  -7  -9   0   13.08    4.07
   7  -9   0    9.44    5.26
   7   9   0    8.01    2.14
  -7   9  -1    2.12    1.34
   7  -9   1   -0.60    2.95
   7   9   1   -0.29    1.19
   7   9   1    1.21    1.12
  -7   9  -2  988.22   39.66
   7   9   2  871.26   38.40
  -7   9  -3   76.66    6.67
   7   9   3   87.41    6.73
   7   9   4 1113.29   46.43
  -7   9  -4 1093.51   47.42
   7  -9   4 1010.27   52.96
  -7  -9  -5   14.13    2.85
  -7   9  -5    5.55    1.87
   7   9   5   10.83    2.17
   7  -9   5    8.34    3.98
  -7  -9  -6    5.18    1.67
   7   9   6    3.62    1.31
   7  -9   6    6.27    3.68
   7  -9   7   16.83    3.93
   7 -10  -9  125.83    8.67
   7 -10  -8  371.11   20.28
  -7  10   8  371.22   19.65
   7 -10  -7   69.64    7.05
  -7  10   7   64.50    6.33
   7 -10  -6   93.24    8.15
  -7  10   5   14.69    2.87
  -7  10   4  137.44    9.44
  -7  10   3   43.88    4.64
   7 -10  -3   32.65    7.04
  -7  10   2   80.06    6.50
   7 -10  -2   71.88   10.91
  -7  10   2   85.05    6.64
  -7  10   1  390.44   19.36
   7 -10  -1  346.40   24.15
   7  10  -1  370.31   18.82
   7  10  -1  414.76   19.46
   7  10   0 1830.30   74.77
   7  10   0 1854.27   74.79
  -7  10   0 1756.28   74.80
   7  10   1   24.29    3.60
  -7  10  -1   25.21    3.58
   7  10   1   21.00    3.15
  -7  10  -2  138.41    9.69
   7  10   2  139.30    9.15
   7  10   3    5.30    1.90
  -7  10  -3    1.90    1.56
  -7  10  -4   15.55    3.10
   7  10   4   12.56    2.25
  -7 -10  -5   25.73    3.37
  -7  10  -5   23.37    3.52
   7  10   5   20.95    2.85
  -7 -10  -6 1547.09   61.54
   7  10   6 1478.13   61.08
   7 -11  -9  175.89   10.19
   7 -11  -8   27.17    4.04
  -7  11   8   28.34    3.97
   7 -11  -7  165.76   11.31
  -7  11   7  169.91   11.17
  -7  11   6  143.53   10.25
  -7  11   5 1021.26   45.28
   7 -11  -4    4.20    2.69
  -7  11   4    3.73    1.70
   7 -11  -3  103.31   10.91
  -7  11   3  103.82    7.87
  -7  11   2   15.96    2.83
   7 -11  -2    9.13    5.23
  -7  11   2   15.73    2.90
   7  11  -2   13.58    2.50
  -7  11   1   72.57    6.26
   7 -11  -1   53.68    9.21
   7  11  -1   71.61    5.87
   7  11  -1   68.36    5.90
   7  11   0    9.59    2.33
   7  11   0    7.10    2.13
  -7  11   0   12.85    2.78
   7  11   1  121.33    8.38
  -7  11  -1  109.69    8.21
   7  11   1  101.08    7.49
  -7  11  -2  260.96   14.70
   7  11   2  239.61   13.58
   7  11   3    7.54    2.08
  -7  11  -3   11.52    2.69
  -7  11  -4  664.31   30.81
  -7 -11  -5   17.99    2.68
   7  11   5   21.03    2.58
  -7  11  -6    2.12    1.21
  -7 -11  -6    0.59    0.76
   7  11   6    1.54    0.80
   7 -12  -9   13.21    2.15
   7 -12  -8  399.30   20.02
  -7  12   8  419.59   20.38
   7 -12  -7   46.16    5.54
  -7  12   7   47.70    5.19
  -7  12   6  246.71   14.47
  -7  12   6  230.59   13.90
   7 -12  -5    8.81    2.88
  -7  12   5   10.09    2.82
   7 -12  -4  117.75    9.67
  -7  12   4  116.39    8.81
   7 -12  -3    4.58    3.21
  -7  12   3    6.39    2.03
  -7  12   2  428.83   21.59
   7 -12  -2  433.78   27.10
   7  12  -2  439.64   21.17
   7  12  -2  440.81   20.90
  -7  12   1  348.45   18.92
   7 -12  -1  323.96   24.33
   7  12  -1  383.68   18.64
   7  12  -1  383.09   18.48
  -7  12   0   16.03    3.05
   7 -12   0   14.32    5.56
   7  12   0   18.17    3.05
   7  12   0   18.88    3.04
  -7  12  -1    7.08    2.39
   7  12   1    9.63    2.34
  -7  12  -2  558.97   27.04
  -7  12  -3   77.33    6.87
  -7  12  -4  876.21   38.98
  -7 -12  -5   19.19    2.48
  -7  12  -5   14.23    2.59
  -7 -12  -6  111.24    6.15
  -7  13   8   37.29    4.00
   7 -13  -8   42.88    4.04
   7 -13  -7  212.51   12.72
  -7  13   7  232.00   12.99
  -7  13   6    8.50    2.31
  -7  13   6   10.65    2.47
  -7  13   5   68.56    6.42
  -7  13   5   61.10    5.92
   7 -13  -4  146.93   10.53
  -7  13   4  141.51   10.00
   7 -13  -3  527.22   26.82
  -7  13   3  478.24   24.26
   7 -13  -2  126.03   11.95
   7  13  -2  109.17    7.74
   7  13  -2  111.89    7.60
   7 -13  -1   78.32   10.63
   7  13  -1   88.45    6.70
   7  13  -1   89.68    6.73
   7  13   0  316.73   16.13
   7 -13   0  277.66   21.93
   7  13   1   14.62    2.88
   7 -13   1   12.05    5.55
  -7  13  -2  526.87   26.83
  -7  13  -2  566.60   26.82
  -7  13  -3    0.34    1.72
  -7  13  -3    0.95    1.65
  -7  13  -4  375.12   19.22
  -7 -13  -5   12.42    1.82
  -7  13  -5   11.58    2.30
  -7  14   8  197.55   10.38
  -7  14   7   64.41    5.51
  -7  14   6   74.50    6.54
  -7  14   6   87.79    6.83
  -7  14   5  137.13    9.61
  -7  14   4    8.23    2.34
   7  14  -4    6.57    1.82
   7 -14  -4    7.57    2.56
  -7  14   3  339.69   18.66
   7  14  -3  363.05   17.68
   7 -14  -3  374.82   20.03
   7  14  -2   36.97    3.91
   7  14  -2   40.68    4.22
   7 -14  -2   36.29    6.10
   7  14  -1    0.23    1.06
   7  14  -1    1.17    1.15
   7 -14  -1   -0.63    3.70
   7 -14   0  604.66   36.22
   7  14   0  668.11   29.49
   7 -14   1  269.05   20.47
   7 -14   2   15.85    5.28
  -7  14  -2   23.18    4.01
   7 -14   3  156.87   13.04
  -7  14  -3  191.89   12.02
   7 -14   4   32.97    5.08
  -7  14  -4   45.52    4.84
  -7 -14  -4   45.64    3.67
  -7 -14  -5   82.75    4.85
  -7  15   7    1.68    1.24
  -7  15   6  475.95   22.59
  -7  15   6  490.23   22.73
  -7  15   5  338.11   17.60
  -7  15   4   64.86    6.07
   7  15  -4   67.34    5.15
   7 -15  -4   70.70    6.09
  -7  15   3   34.55    4.42
   7 -15  -3   27.46    4.34
   7  15  -2   83.51    6.19
   7  15  -2   88.65    6.15
   7 -15  -2   88.88    8.29
   7  15  -1   98.42    6.78
   7  15  -1   98.49    6.78
   7 -15  -1   92.70    9.79
   7  15   0    4.29    1.60
   7 -15   0    2.46    3.81
   7 -15   1  109.41   11.84
   7 -15   2  489.62   27.79
  -7  15  -3   29.29    4.24
   7 -15   3   20.17    4.76
  -7  15  -4  312.94   15.62
  -7 -15  -4  311.55   13.46
  -7  16   6   68.67    5.09
  -7  16   5    2.32    1.33
   7  16  -4    0.66    1.03
  -7  16   4    1.57    1.39
  -7  16   3    4.58    1.73
   7  16  -3    1.61    1.15
   7 -16  -3    3.28    1.85
   7  16  -2   13.63    2.25
   7  16  -2   11.74    1.98
   7 -16  -2   13.79    3.11
   7  16  -1  740.71   32.78
   7 -16  -1  792.63   36.30
   7  16  -1  781.73   32.89
   7  16   0  231.99   12.11
   7 -16   0  242.37   15.77
   7 -16   1  115.44   10.39
   7 -16   2   53.93    6.64
  -7  16  -3  171.86   10.27
   7 -16   3  123.08    9.34
  -7  17   5  181.64    9.81
  -7  17   4  335.26   16.50
   7  17  -4  337.29   15.31
   7 -17  -3   61.19    5.14
   7  17  -3   65.85    4.64
   7  17  -2  216.41   10.43
   7 -17  -2  199.33   11.36
   7  17  -2  185.15    9.98
   7 -17  -1   18.57    3.34
   7  17  -1   17.36    2.26
   7  17  -1   19.15    2.40
   7 -17   0   76.65    6.80
   7 -17   1   30.56    4.25
   7 -17   2  151.43    9.55
  -7  17  -2  157.61    9.02
   7  18  -4   33.35    2.67
   7  18  -3  274.07   12.63
   7 -18  -2   98.82    6.38
   7  18  -2  102.46    5.82
   7  18  -2   97.69    5.69
   7 -18  -1    2.85    1.56
  -7  18   1    3.43    1.57
   7 -18   0    2.11    1.47
  -7  18   0    4.19    1.66
  -7  18  -1  253.56   12.99
   8   0 -11   -0.21    1.16
   8   0 -10   62.66    6.12
   8   0 -10   63.74    6.09
   8   0  -9   -0.35    1.83
   8   0  -8  336.53   18.67
   8   0  -7   -0.35    1.67
   8   0  -6 1042.23   42.43
   8   0  -6  897.80   52.05
   8   0  -6  906.31   42.81
   8   0  -5    2.95    1.46
   8   0  -5    0.95    1.96
   8   0  -5    2.17    1.61
   8   0  -4   43.75    8.10
   8   0  -4   38.90    7.80
   8   0  -3    0.96    1.97
   8   0  -2   76.39   12.01
   8   0  -2  113.67   12.96
  -8   0   1    0.50    1.18
   8   0  -1    0.83    2.20
   8   0   0 5277.04  217.81
  -8   0   0 5204.50  212.27
  -8   0  -1    0.68    1.80
   8   0   2  221.65   13.12
  -8   0  -2  231.14   22.50
  -8   0  -2  201.16   11.72
  -8   0  -2  226.29   12.58
   8   0   2  237.20   13.58
   8   0   3    0.32    1.54
  -8   0  -3    0.61    1.40
   8   0   3   -0.34    1.65
   8   0   4  202.12   12.66
   8   0   4  187.96   12.55
   8   0   5    2.16    2.01
   8   0   5    3.38    1.55
   8   0   6  642.10   30.69
   8   0   6  670.27   31.23
   8   0   7    0.72    1.40
   8   0   7    2.36    1.71
   8   0   7    1.28    1.55
   8   1 -11   81.84    6.14
   8  -1 -11   85.65    6.31
   8   1 -11   93.23    6.38
   8  -1 -10   95.26    7.56
   8   1 -10   90.13    7.41
   8   1 -10   77.63    7.01
   8  -1 -10   80.20    7.00
   8  -1  -9  110.41    8.71
   8   1  -9  108.11    8.84
   8  -1  -9  111.46    9.15
   8   1  -8    8.09    2.64
   8  -1  -8    5.95    2.41
   8  -1  -8    9.30    2.90
   8  -1  -7  298.62   17.26
   8   1  -7  308.92   17.66
   8  -1  -7  328.21   18.50
   8   1  -6    4.65    1.96
   8  -1  -6    2.70    1.54
   8   1  -6    5.05    3.61
   8  -1  -6    2.00    3.15
   8   1  -6    2.67    2.06
   8  -1  -6    1.30    1.69
   8  -1  -5  235.69   13.02
   8   1  -5  251.10   13.31
   8   1  -5  241.89   20.58
   8  -1  -5  230.25   20.34
   8  -1  -5  232.59   14.09
   8   1  -5  231.19   13.85
   8   1  -4 2389.19  103.54
   8   1  -4 2214.41  103.64
   8  -1  -4 2257.52  104.32
   8  -1  -3  479.40   33.89
   8   1  -3  535.21   32.67
   8   1  -2 1824.85   86.74
   8  -1  -2 1812.70   86.26
   8   1  -1   34.86    8.62
   8   1  -1   50.19    8.08
   8  -1  -1   38.32    7.61
  -8  -1   1   47.91    6.35
  -8  -1   0    6.18    2.75
   8   1   0    4.09    3.08
   8  -1   0   -0.97    2.58
  -8  -1  -1   83.57   10.18
  -8  -1  -2 1318.87   54.43
  -8   1  -2 1212.35   53.00
  -8  -1  -2 1230.37   53.53
  -8  -1  -2 1350.10   63.19
   8   1   2 1327.87   54.88
   8   1   2 1269.07   54.74
   8  -1   2 1282.80   55.47
  -8   1  -2 1248.22   68.69
  -8   1  -2 1373.54   67.02
   8   1   3   22.45    3.72
  -8  -1  -3   27.15    3.95
   8   1   3   26.06    3.94
   8  -1   3   29.06    4.32
   8   1   4  455.49   22.95
  -8  -1  -4  433.24   23.08
   8   1   4  454.10   23.02
   8  -1   4  459.51   23.67
   8   1   5   33.81    4.71
   8  -1   5   27.37    4.58
   8   1   5   31.55    4.59
   8   1   6   13.08    2.98
   8  -1   6   13.30    3.01
   8   1   6   15.62    3.22
   8   1   7   64.47    5.57
   8  -1   7   55.18    5.43
   8   1   7   58.77    5.36
   8  -1   7   64.05    5.75
   8   1   7   60.80    5.28
   8   2 -11   11.47    2.20
   8  -2 -11   10.55    2.27
   8   2 -11    8.88    1.97
   8  -2 -11    9.25    1.97
   8   2 -10   14.90    3.12
   8  -2 -10   15.47    3.26
   8   2 -10   14.91    2.95
   8  -2 -10   16.08    3.01
   8   2  -9    2.17    2.15
   8  -2  -9    2.75    1.98
   8   2  -8   91.46    8.27
   8  -2  -8  110.16    9.34
   8   2  -7    3.94    2.22
   8  -2  -7    1.65    2.08
   8   2  -6  873.09   37.92
   8   2  -6  727.94   46.51
   8  -2  -6  786.47   47.30
   8   2  -6  802.23   38.41
   8  -2  -6  813.93   38.30
   8   2  -5   36.85    7.61
   8  -2  -5   55.55    9.23
   8   2  -5   55.63    5.10
   8  -2  -5   59.73    5.17
   8   2  -5   51.06    9.21
   8   2  -5   44.23    5.18
   8  -2  -5   49.19    5.53
   8   2  -4  368.42   25.93
   8  -2  -4  346.12   25.80
   8   2  -3  138.92   14.00
   8  -2  -3  127.99   15.64
   8   2  -2 1811.50   79.81
   8  -2  -2 1453.66   82.80
   8   2  -1   79.79   12.47
  -8  -2   1  129.62   11.22
   8   2  -1  151.91   13.85
   8  -2  -1  102.82   13.09
  -8   2   0 1188.66   57.67
  -8  -2   0 1111.92   55.82
   8  -2   0 1165.67   62.12
   8   2   0 1217.95   58.37
  -8   2  -1  242.19   19.88
  -8  -2  -1  237.58   19.08
  -8  -2  -2 1713.30   71.59
  -8   2  -2 1683.02   70.04
  -8  -2  -2 1594.65   70.87
  -8  -2  -2 1664.88   80.93
   8   2   2 1790.55   71.84
  -8   2  -2 1907.43   85.69
   8   2   2 1828.52   71.97
   8  -2   2 1764.04   73.27
   8   2   3    9.66    2.46
   8   2   3   12.73    2.91
  -8  -2  -3    8.88    2.50
   8   2   3    7.42    2.24
   8  -2   3   10.10    2.95
   8   2   4  434.53   21.93
  -8  -2  -4  439.87   22.83
   8   2   4  435.60   21.88
   8  -2   4  389.41   22.53
   8   2   5   34.42    4.65
  -8  -2  -5   33.18    5.04
   8   2   5   32.79    4.51
   8  -2   5   40.12    5.46
   8   2   6   48.17    5.17
   8   2   6   46.13    5.10
   8  -2   6   39.49    5.28
   8   2   7   91.09    6.56
   8  -2   7   75.83    6.70
   8   2   7  100.85    6.84
   8   2   7   92.59    6.59
   8  -2   7   82.67    6.83
   8  -3 -11   40.07    4.26
   8   3 -11   36.70    3.69
   8  -3 -10  118.46    8.99
   8   3 -10  107.04    7.94
   8  -3 -10  117.08    8.24
   8   3 -10  105.70    8.23
   8  -3  -9  149.37   10.82
   8   3  -9  125.21    9.73
   8  -3  -8  449.98   22.88
   8   3  -8  450.64   23.69
   8  -3  -8  488.51   24.96
   8  -3  -7   97.33    7.62
   8   3  -7   86.02    7.94
   8   3  -6  920.15   41.30
   8   3  -5   25.87    6.27
   8  -3  -5   34.19    7.17
   8   3  -5   26.63    3.88
   8  -3  -5   26.18    3.49
   8   3  -5   22.22    3.46
   8   3  -5   26.56    6.46
   8  -3  -4  493.72   34.93
   8   3  -4  530.99   31.85
   8  -3  -4  461.44   31.35
   8  -3  -3  285.28   24.67
   8   3  -3  265.75   19.91
  -8   3   3  248.23   19.28
   8  -3  -2 2950.85  130.32
   8   3  -2 2822.84  125.04
  -8   3   2 2898.16  125.10
   8   3  -1   36.39    7.87
  -8  -3   1   53.77    7.28
   8   3  -1   61.52    8.58
   8  -3  -1   44.74    8.76
   8   3   0   53.01   10.03
  -8   3   0   54.80    8.57
  -8  -3   0   71.79    9.29
   8   3   0   61.61    8.72
   8  -3   0   57.34   10.38
  -8   3  -1   28.95    3.31
  -8  -3  -1   35.44    7.03
   8  -3   1   24.77    4.48
   8   3   1   32.68    6.69
  -8  -3  -1   39.18    8.05
  -8   3  -1   20.44    5.92
  -8   3  -1   25.72    6.27
   8   3   1   20.64    3.40
   8   3   1   29.32    3.66
  -8  -3  -2  979.85   52.58
   8   3   2  963.62   42.59
   8   3   2  987.07   42.44
  -8   3  -2  795.40   53.02
  -8   3  -2  949.09   53.89
   8   3   2  925.92   41.91
   8  -3   2  934.62   43.93
   8   3   2  998.30   42.34
   8  -3   2  978.03   44.36
   8   3   3   27.26    3.97
   8   3   3   29.12    4.27
  -8  -3  -3   28.09    4.24
   8   3   3   31.49    4.14
   8  -3   3   25.63    4.51
   8   3   4  519.69   24.85
   8   3   4  510.97   25.34
   8   3   4  538.36   24.86
   8  -3   4  524.29   26.91
   8   3   5    0.32    1.71
   8   3   5    3.11    1.65
   8  -3   5   -0.45    2.02
  -8  -3  -5    2.16    2.18
   8   3   6  161.60   10.49
   8  -3   6  181.66   12.18
   8   3   6  175.20   10.87
   8   3   7   17.08    2.73
   8   3   7   15.29    2.52
   8  -3   7   13.76    2.90
   8  -3   7   15.20    2.98
   8   3   7   14.84    2.40
   8  -3   7   17.71    3.22
   8  -4 -10   10.44    2.77
   8   4 -10   10.56    2.55
   8  -4  -9    1.17    1.68
   8   4  -9    3.06    1.98
   8   4  -8  251.45   15.10
   8  -4  -8  256.59   16.07
   8  -4  -8  246.56   14.54
   8  -4  -7    7.59    2.36
   8   4  -7    8.33    2.63
   8  -4  -7    7.17    2.76
   8   4  -6 1073.34   47.02
   8   4  -5   94.42    7.17
   8  -4  -5   82.09    6.53
   8   4  -5   83.85    6.90
   8  -4  -5   77.27   12.71
   8   4  -5   71.08   10.95
   8  -4  -4   49.60    6.77
   8   4  -4   51.45    8.37
   8  -4  -4   50.97   10.26
   8   4  -4   40.99    4.79
   8   4  -3  162.37   14.48
  -8   4   3  151.10   14.98
   8  -4  -3  146.61   17.46
   8   4  -2  296.60   21.04
  -8   4   2  277.36   21.69
   8  -4  -2  265.97   24.20
   8   4  -1  369.36   26.58
  -8  -4   1  412.57   25.01
  -8   4   0 2308.86  111.02
  -8  -4   0 2696.14  111.33
   8   4   1  206.03   14.00
  -8  -4  -1  303.23   22.60
   8   4   1  288.32   14.46
   8  -4   1  294.08   17.66
   8   4   1  292.01   14.43
   8   4   1  227.47   15.01
  -8   4  -1  281.59   22.51
   8   4   2  461.09   22.43
   8  -4   2  433.62   31.28
  -8  -4  -2  411.09   30.54
   8   4   2  483.52   22.71
   8   4   3  169.48   10.80
   8   4   3  165.43   10.83
  -8  -4  -3  156.57   11.20
   8   4   4    2.49    1.86
   8   4   4    1.29    1.49
   8   4   4    2.94    1.64
  -8  -4  -4    1.63    2.06
   8   4   5  306.10   16.19
   8   4   5  271.97   15.84
  -8  -4  -5  276.12   17.40
   8   4   5  302.58   15.88
   8   4   6  482.32   23.02
   8  -4   7   30.17    4.23
   8   4   7   26.77    3.09
   8   5 -10  427.32   20.21
   8  -5 -10  399.01   20.86
   8  -5  -9    3.39    2.19
   8   5  -9    0.63    1.49
   8  -5  -8   45.16    5.23
   8  -5  -8   41.63    5.77
   8   5  -8   45.37    5.28
   8  -5  -8   45.14    6.10
   8  -5  -7   49.15    5.31
   8  -5  -7   40.60    5.72
   8  -5  -7   49.09    6.23
   8   5  -7   44.22    5.23
   8   5  -6   73.92    6.61
   8  -5  -6   78.31    6.69
   8  -5  -5  228.95   23.25
   8   5  -4 4023.01  165.20
   8  -5  -4 4294.11  184.05
   8  -5  -4 4635.39  171.92
  -8   5   4 3881.13  175.97
   8   5  -4 4178.80  174.90
  -8   5   3    8.42    3.86
   8  -5  -3    4.88    4.11
   8   5  -2  553.00   31.73
   8  -5  -2  519.80   36.56
  -8   5   2  535.83   34.53
   8   5   0  112.29    8.97
  -8  -5   0  140.46   14.05
  -8   5   0  122.70   14.47
   8   5   0  150.46    8.66
   8   5   0  122.22    9.13
   8  -5   0  159.68   13.03
   8   5   1   25.73    4.00
   8  -5   1   30.78    6.05
  -8  -5  -1   31.91    7.06
  -8   5  -1   28.89    6.95
   8   5   1   41.30    4.20
   8  -5   1   38.74    7.70
   8   5   2  988.13   43.48
   8   5   2 1028.61   43.77
  -8  -5  -3   21.16    3.81
   8   5   3   23.31    3.48
   8   5   3   21.88    3.51
  -8  -5  -4  955.39   42.56
   8   5   4  881.07   40.73
   8   5   4  934.51   40.80
  -8  -5  -5   29.96    4.64
   8   5   5   33.27    4.10
   8   5   5   23.08    3.60
  -8  -5  -6   -0.32    1.62
   8   5   6    0.47    1.33
   8   5   7    4.51    1.38
   8  -5   7    8.00    2.87
   8  -6 -10    2.23    1.78
   8   6 -10   -0.21    1.25
   8   6  -9   58.14    5.52
   8  -6  -9   52.41    5.98
   8   6  -8  139.27    9.80
   8  -6  -8  169.28   12.03
   8  -6  -8  137.02   10.75
   8  -6  -8  145.88   10.19
   8  -6  -7    2.59    2.18
   8  -6  -7    2.89    2.20
   8  -6  -7    4.15    2.12
   8  -6  -6 1252.39   52.23
   8  -6  -6 1160.75   53.56
   8  -6  -5   16.39    2.98
   8   6  -4  131.53   14.08
   8  -6  -4  186.52   13.79
  -8   6   4  132.93   15.63
   8   6  -4  155.89    9.85
   8  -6  -4  158.93   18.58
   8  -6  -3  274.50   19.47
   8   6  -3  255.72   14.34
  -8   6   3  260.88   22.73
   8   6  -3  264.58   14.00
   8  -6  -3  221.94   22.86
   8  -6  -2  708.90   38.83
   8  -6  -2  763.67   46.05
   8   6  -2  676.90   31.92
  -8   6   2  790.43   45.01
   8   6  -1  175.40    9.88
   8   6  -1  160.82   10.46
   8  -6  -1  160.45   14.92
   8   6   0 2290.66   94.22
  -8  -6   0 2680.68  104.69
  -8   6   0 1930.85  103.72
   8   6   0 2365.19   92.30
   8   6   0 2268.81   93.72
   8  -6   0 2111.13   99.03
   8   6   1  328.00   18.60
  -8  -6  -1  413.19   27.12
   8  -6   1  348.96   26.73
   8   6   1  375.32   17.63
   8  -6   1  289.50   21.35
   8   6   2  284.05   14.87
   8  -6   2  258.91   18.68
   8   6   2  268.28   14.46
   8   6   3  169.16   10.65
   8   6   3  159.45   10.41
  -8  -6  -3  184.14   11.51
   8   6   4   -0.57    1.43
   8   6   4    3.12    1.66
  -8  -6  -4    2.53    1.72
  -8  -6  -5  103.96    8.46
   8   6   5   93.14    7.18
   8   6   5   93.60    7.12
  -8  -6  -6  197.38   11.29
   8  -6   6  159.32   13.06
   8   6   6  169.96    9.92
   8  -6   7  268.06   15.38
   8   6   7  239.29   11.77
   8  -7 -10   23.54    3.32
   8  -7  -9    8.60    2.57
   8  -7  -9    9.36    3.01
   8  -7  -8  461.09   24.24
   8  -7  -8  447.80   23.46
   8  -7  -8  444.48   22.69
   8  -7  -7  170.11   12.62
   8  -7  -7  171.09   12.41
   8  -7  -7  201.27   12.16
   8  -7  -6  435.19   21.35
   8  -7  -6  391.88   22.16
   8  -7  -5  107.92    7.91
  -8   7   5  109.18    8.23
   8  -7  -4  575.75   29.26
  -8   7   4  491.13   24.44
   8  -7  -4  502.30   36.86
   8  -7  -3  173.40   14.80
   8   7  -3  146.93    9.69
  -8   7   3  152.71   17.94
   8  -7  -3  144.06   17.68
   8  -7  -2 2940.41  122.40
   8  -7  -2 2671.90  128.26
  -8   7   2 2870.98  131.03
   8   7  -2 2774.14  112.99
   8   7  -1   38.04    4.47
   8  -7  -1   36.35    8.78
   8  -7  -1   55.00    9.25
   8  -7   0   13.91    5.26
  -8  -7   0   18.24    4.85
  -8   7   0    9.25    4.60
   8   7   0   18.38    3.27
   8   7   1   14.78    3.20
   8  -7   1   17.11    5.24
   8   7   1   15.51    2.65
   8  -7   2  456.06   29.58
   8   7   2  568.16   25.12
   8   7   3    2.13    1.65
   8   7   3    4.89    1.68
   8  -7   3    2.17    3.66
  -8  -7  -3    0.31    1.26
  -8  -7  -4  720.10   31.05
   8   7   4  634.49   29.48
   8   7   4  648.21   29.51
  -8   7  -4  637.59   30.04
  -8  -7  -5   49.60    5.30
   8  -7   5   40.26    7.35
   8   7   5   42.89    4.46
   8   7   5   42.50    4.43
  -8  -7  -6  115.35    7.86
   8  -7   6  127.51   11.19
   8   7   6  118.89    7.30
   8  -8 -10   78.97    6.17
   8  -8  -9   19.98    3.27
   8  -8  -9   15.98    3.38
   8  -8  -8   86.97    8.04
   8  -8  -8   82.77    7.40
   8  -8  -8   88.14    8.82
   8  -8  -7   60.25    6.76
   8  -8  -7   57.66    6.43
   8  -8  -7   60.77    6.15
   8  -8  -6  237.85   14.82
   8  -8  -6  219.07   13.42
  -8   8   5   22.85    3.66
  -8   8   4  444.92   22.59
   8  -8  -4  489.64   26.78
  -8   8   3   52.90    5.19
   8  -8  -3   54.41   10.46
   8  -8  -3   45.40    7.50
   8   8  -3   53.53    5.26
  -8   8   2 1892.15   75.44
  -8   8   2 1954.93   75.97
   8   8  -2 1806.88   75.57
   8  -8  -2 1683.18   83.09
  -8   8   1  193.59   10.98
   8   8  -1  174.57   10.82
   8  -8  -1  168.64   16.36
   8   8  -1  169.83   10.49
  -8   8   0  826.23   35.41
   8   8   0  757.23   35.22
   8  -8   0  758.93   42.30
   8  -8   1   50.31    8.30
   8   8   1   69.57    6.58
  -8   8  -1   66.50    5.93
   8  -8   2 1125.13   55.39
   8   8   3  203.79   11.49
  -8  -8  -3  205.83   12.00
  -8   8  -3  200.99   12.25
   8   8   4  363.05   18.20
  -8   8  -4  336.48   18.63
   8  -8   4  338.67   24.98
   8   8   5  225.42   11.80
  -8  -8  -5  227.53   12.41
  -8   8  -5  189.76   12.01
  -8  -8  -6   42.38    3.98
   8  -8   6   37.76    6.17
   8  -9  -9  440.68   22.05
   8  -9  -8    0.43    2.26
   8  -9  -8    2.57    2.00
  -8   9   8    1.27    1.65
   8  -9  -7  404.86   21.86
   8  -9  -6    2.87    1.70
   8  -9  -6    4.23    2.29
  -8   9   5   88.74    7.33
   8  -9  -5   73.36    7.29
  -8   9   4 1864.08   77.38
  -8   9   3  203.42   12.25
   8  -9  -3  197.52   15.28
   8   9  -3  200.07   11.76
  -8   9   2  734.98   32.25
  -8   9   2  727.24   31.95
   8  -9  -2  673.63   38.02
   8   9  -2  664.87   31.58
   8  -9  -1   40.54    8.28
   8   9  -1   41.14    4.58
   8   9  -1   58.46    5.34
  -8   9   1   45.96    4.89
   8  -9   0   47.35    8.33
   8   9   0   43.92    4.76
   8   9   0   34.86    4.33
  -8   9   0   32.00    4.20
  -8   9  -1  105.57    7.89
   8  -9   1   85.32   10.97
  -8   9  -2  763.56   33.38
   8  -9   2  623.79   37.77
  -8   9  -3  177.89   11.35
   8  -9   3  183.96   16.52
   8   9   4  813.50   35.20
  -8  -9  -4  847.13   36.02
  -8   9  -4  765.11   36.01
   8  -9   4  802.71   43.73
  -8  -9  -5    1.37    1.22
  -8   9  -5    2.72    1.41
   8   9   5    1.57    1.05
   8  -9   5    1.93    3.51
  -8  -9  -6    2.89    1.14
   8  -9   6    1.81    2.95
   8 -10  -9   58.75    5.43
   8 -10  -8  101.51    8.65
  -8  10   8  101.07    7.92
   8 -10  -7   20.46    3.88
   8 -10  -6  834.04   38.63
  -8  10   6  841.62   38.14
  -8  10   5   40.88    4.92
  -8  10   4   11.16    2.59
  -8  10   3   14.09    2.91
   8  10  -3   21.51    3.23
  -8  10   2  103.31    7.84
  -8  10   2   96.99    7.60
   8  10  -2  106.87    7.71
   8  10  -1   31.76    4.02
  -8  10   1   38.81    4.54
   8 -10  -1   26.93    7.17
   8  10  -1   35.43    4.29
   8  10   0 3784.39  154.63
  -8  10   0 3792.18  155.17
   8  10   0 4075.53  155.03
  -8  10  -1   57.82    5.71
  -8  10  -1   58.83    5.80
   8 -10   1   45.67    8.16
  -8  10  -2    1.88    1.40
   8 -10   2    5.69    4.06
  -8  10  -3    3.34    1.70
   8 -10   3    1.49    3.85
   8  10   4   64.05    4.99
  -8 -10  -4   60.32    5.28
  -8  10  -4   56.15    5.55
   8 -10   4   72.24    9.78
  -8  10  -5    4.67    1.76
  -8 -10  -5    6.00    1.62
   8 -10   5    5.35    3.31
   8 -10   6  390.81   20.66
  -8 -10  -6  421.47   16.94
   8 -11  -9   22.39    2.95
   8 -11  -8   81.56    7.01
  -8  11   8   71.53    6.30
   8 -11  -7  311.42   16.47
  -8  11   7  263.91   15.56
  -8  11   6   40.60    5.03
  -8  11   5  460.66   23.20
   8  11  -4 1122.92   47.34
  -8  11   4 1102.02   48.66
   8  11  -3   72.53    6.09
  -8  11   3   74.94    6.59
  -8  11   2  832.69   37.71
  -8  11   2  785.11   37.37
   8 -11  -2  804.57   45.25
   8  11  -2  923.64   37.63
   8  11  -1  177.94   11.04
  -8  11   1  183.12   11.71
   8  11  -1  202.13   11.59
   8 -11  -1  184.70   17.46
   8  11   0   42.54    4.70
  -8  11   0   35.95    4.65
   8  11   0   47.21    4.87
  -8  11  -1    3.45    1.91
  -8  11  -2  645.10   30.33
  -8  11  -3   74.51    6.49
  -8  11  -4  418.60   21.23
  -8 -11  -4  452.85   20.48
  -8 -11  -5  143.34    8.06
   8 -12  -8   62.14    5.62
  -8  12   8   77.75    6.05
  -8  12   7  101.47    7.74
  -8  12   6  282.97   15.74
  -8  12   6  274.89   15.35
  -8  12   5    5.22    2.06
   8  12  -4  421.40   20.00
  -8  12   4  403.39   21.20
  -8  12   3    4.38    1.75
   8  12  -3    2.99    1.55
   8 -12  -3    3.59    3.05
  -8  12   2 1087.99   46.84
   8 -12  -2 1007.26   52.75
   8  12  -2 1086.62   46.10
   8  12  -1   39.07    4.35
  -8  12   1   37.04    4.68
   8  12  -1   41.61    4.53
   8 -12  -1   31.72    7.82
   8  12   0  609.71   27.44
  -8  12   0  566.38   28.06
   8  12   0  618.32   27.44
  -8  12  -1  339.48   18.13
  -8  12  -2 1357.60   57.92
  -8  12  -3   15.35    2.92
  -8 -12  -4  306.40   14.74
  -8  12  -5    5.05    1.55
  -8 -12  -5    5.51    1.25
  -8  13   8  228.47   11.42
   8 -13  -8  189.35   10.75
   8 -13  -7   65.56    6.06
  -8  13   7   86.91    6.48
  -8  13   6  349.56   18.20
  -8  13   6  346.05   17.94
  -8  13   5  106.77    8.21
  -8  13   5  104.92    7.82
  -8  13   4  246.51   14.38
   8  13  -4  243.41   13.00
   8 -13  -4  242.76   14.55
  -8  13   3   99.78    8.00
   8 -13  -3  107.00    9.71
   8  13  -3  106.86    7.37
   8 -13  -2 1111.36   52.41
   8  13  -2 1153.69   46.82
   8  13  -2 1036.56   46.05
   8  13  -1  251.92   13.68
   8  13  -1  273.10   14.07
   8  13   0    6.41    2.05
   8 -13   0    4.62    4.58
   8 -13   1   21.58    6.17
  -8  13  -2  470.23   23.43
  -8  13  -2  446.60   22.60
  -8  13  -3   83.15    7.07
  -8  13  -4  371.19   19.42
  -8 -13  -4  424.45   18.12
  -8  14   7   44.67    4.28
  -8  14   6  307.49   15.78
  -8  14   6  287.82   15.43
  -8  14   5  184.58   11.47
  -8  14   4   34.86    4.49
   8  14  -4   44.87    4.11
   8 -14  -4   38.16    4.76
  -8  14   3  122.12    9.04
   8 -14  -3  137.84   10.14
   8  14  -3  131.39    8.25
   8  14  -2  118.31    7.77
   8 -14  -2  112.01   10.52
   8  14  -2  139.45    8.39
   8  14  -1  162.05    9.34
   8  14  -1  156.13    9.35
   8 -14   0 1317.44   62.68
   8  14   1   39.34    4.16
   8 -14   1   31.13    6.89
   8 -14   2   21.69    5.88
   8 -14   3  179.42   13.63
  -8  14  -3  204.94   12.18
   8 -14   4   10.05    3.03
  -8 -14  -4    9.74    1.42
  -8  14  -4    9.93    2.16
  -8  15   6   20.70    2.94
  -8  15   5  105.18    7.59
  -8  15   4 1434.53   59.99
   8 -15  -4 1432.40   59.27
   8  15  -4 1411.08   58.04
  -8  15   3    5.99    2.07
   8 -15  -3    2.86    2.15
   8  15  -3    2.65    1.26
   8  15  -2  147.39    8.58
   8  15  -2  151.21    8.83
   8 -15  -2  149.00   10.88
   8  15  -1   91.10    6.28
   8  15  -1   96.35    6.47
   8 -15  -1   98.70    9.42
   8 -15   0   20.49    5.19
   8  15   1    7.81    1.84
   8 -15   1   10.10    4.29
   8 -15   2  459.50   25.46
   8 -15   3   71.20    7.39
  -8  15  -3  105.05    7.53
  -8  16   6  308.67   14.56
  -8  16   5    2.92    1.34
   8  16  -4   50.89    3.94
  -8  16   4   45.14    4.62
   8 -16  -3   92.21    6.98
   8  16  -3  107.90    6.44
   8  16  -2  166.04    8.96
   8 -16  -2  160.99   10.48
   8  16  -2  174.89    9.24
   8  16  -1  182.62    9.53
   8 -16  -1  169.29   11.48
   8 -16   0  898.40   41.53
   8  16   0  920.35   38.48
   8 -16   1  570.47   28.29
   8 -16   2  194.31   12.23
   8  17  -4   86.94    5.11
  -8  17   4   82.55    5.85
   8  17  -3    1.93    0.95
   8 -17  -3    2.21    1.33
   8  17  -2  830.00   33.51
   8 -17  -2  770.84   34.40
   8 -17  -1    2.43    1.66
   8 -17   0   10.95    2.59
   8  17   0    7.20    1.55
   8 -17   1    3.37    1.81
   8 -18  -2  270.16   12.78
   9   0 -10  492.38   23.11
   9   0 -10  446.93   22.72
   9   0  -9   -0.35    1.95
   9   0  -8  344.77   19.25
   9   0  -7    1.56    1.58
   9   0  -7    3.05    2.03
   9   0  -6 1921.26   79.54
   9   0  -6 1924.27   81.10
   9   0  -5    0.28    1.09
   9   0  -5   -1.09    2.59
   9   0  -5   -0.35    1.94
   9   0  -4   18.92    3.67
   9   0  -4   32.84    7.43
   9   0  -4   33.53    4.00
   9   0  -3   -1.00    2.65
   9   0  -2  318.95   26.32
   9   0  -1    1.29    3.43
   9   0  -1    0.94    2.51
  -9   0   0 1008.83   41.41
   9   0   0  908.69   41.86
   9   0   0  929.16   42.12
   9   0   0 1065.38   54.71
  -9   0  -1    3.65    1.61
  -9   0  -1    1.13    2.70
   9   0   1    0.32    1.74
   9   0   1    0.65    1.34
   9   0   1    5.64    4.02
   9   0   2  411.57   21.26
   9   0   2  426.75   21.56
  -9   0  -2  392.40   20.12
   9   0   3    0.34    1.74
   9   0   3   -0.70    2.28
   9   0   3   -1.07    1.95
   9   0   4  320.71   17.65
   9   0   4  304.64   17.58
   9   0   4  321.71   17.92
   9   0   5   -1.61    1.99
   9   0   5    0.34    2.01
   9   0   5   -0.35    1.65
   9   0   6   11.22    2.65
   9   0   6    8.97    2.32
   9   0   7    0.87    1.16
   9   0   7    0.18    1.00
   9   1 -10 1145.26   48.15
   9   1 -10 1056.59   47.66
   9  -1 -10 1138.41   48.08
   9  -1  -9  206.40   12.80
   9  -1  -9  190.79   12.40
   9   1  -9  187.28   12.45
   9  -1  -8  713.29   33.26
   9  -1  -8  772.80   35.04
   9   1  -8  678.35   33.92
   9  -1  -8  740.59   34.25
   9   1  -7  341.92   20.13
   9  -1  -7  383.54   20.75
   9   1  -7  392.52   19.76
   9   1  -6  125.08    9.66
   9  -1  -6  111.35    9.31
   9  -1  -6  125.65    8.84
   9   1  -6  126.10    9.00
   9   1  -5  536.39   26.09
   9  -1  -5  511.76   26.10
   9  -1  -5  510.29   24.72
   9   1  -5  543.64   25.16
   9   1  -5  481.52   34.42
   9  -1  -5  531.44   35.70
   9   1  -4  919.13   40.84
   9  -1  -4  913.59   41.83
   9   1  -4  932.17   41.73
   9   1  -4  936.12   50.52
   9  -1  -4  952.23   40.48
   9   1  -4  929.43   40.62
   9  -1  -3  603.24   30.15
   9   1  -3  709.09   30.58
   9  -1  -3  633.29   40.48
   9   1  -3  612.47   38.17
   9   1  -2  386.01   27.87
   9  -1  -2  309.46   27.58
   9   1  -1   60.25   11.48
   9   1  -1   81.69   11.24
   9  -1  -1  102.21   13.38
  -9  -1   1   96.23   10.15
  -9   1   0    9.24    2.08
  -9  -1   0    8.32    2.06
  -9  -1   0   12.97    4.36
   9   1   0   10.39    4.36
   9  -1   0   11.08    4.94
   9   1   0    9.76    2.19
   9  -1   0    5.98    2.17
   9   1   0    9.15    2.35
   9  -1   0    5.79    2.19
   9   1   0    6.32    2.09
  -9   1  -1   74.48    6.02
  -9  -1  -1   77.14    6.37
   9   1   1   67.52   10.93
   9  -1   1   86.22   13.45
  -9  -1  -1   71.54   10.35
   9   1   1   74.40    6.49
   9   1   1   71.71    6.51
   9  -1   1   66.19    6.74
  -9  -1  -1   79.59   12.10
   9   1   1   71.57    6.46
   9  -1   1   67.71    6.71
   9   1   2    1.87    1.62
   9   1   2    4.16    2.05
   9  -1   2    1.43    1.91
   9   1   2    2.29    1.65
   9  -1   2    1.47    1.69
  -9   1  -2    2.52    1.41
  -9  -1  -2    2.06    1.45
   9   1   3    8.18    2.52
   9   1   3    9.33    2.44
   9  -1   3    9.65    2.67
   9   1   3    9.20    2.71
   9  -1   3   13.28    3.15
  -9  -1  -3    7.85    2.50
   9   1   4  395.82   20.63
   9   1   4  388.43   20.59
   9  -1   4  399.08   21.28
   9   1   4  399.32   20.83
   9  -1   4  387.69   21.29
   9   1   5   37.59    4.72
   9   1   5   39.99    4.88
   9  -1   5   36.25    5.13
   9   1   5   41.55    4.98
   9  -1   5   29.07    4.50
   9   1   6  210.64   12.05
   9   1   6  210.91   12.26
   9  -1   6  198.29   12.37
   9   1   6  223.05   12.35
   9  -1   6  219.87   12.62
   9   1   7   51.83    4.19
   9  -1   7   48.93    4.26
   9  -1   7   45.22    4.09
   9   1   7   46.30    4.00
   9  -2 -10   38.78    4.54
   9   2 -10   30.65    4.06
   9   2 -10   29.55    3.84
   9  -2 -10   28.51    3.89
   9  -2  -9   35.91    4.92
   9   2  -9   25.43    4.21
   9  -2  -8  465.53   23.53
   9  -2  -8  490.74   25.36
   9   2  -8  477.95   24.44
   9   2  -7    1.10    1.81
   9  -2  -7    4.00    2.16
   9   2  -6 1937.02   79.08
   9  -2  -6 1776.23   79.06
   9  -2  -6 1878.88   77.77
   9   2  -6 1913.45   78.12
   9   2  -5   77.95    6.88
   9  -2  -5   62.95    6.60
   9  -2  -5   73.06    6.14
   9   2  -5   66.03    6.14
   9   2  -5   60.11   10.26
   9  -2  -5   63.56   10.97
   9   2  -4 1311.35   63.56
   9  -2  -4 1176.87   63.41
   9   2  -4 1137.74   51.80
   9  -2  -4 1172.34   52.82
   9   2  -4 1293.37   52.87
   9   2  -4 1190.56   61.07
   9  -2  -4 1253.46   51.61
   9   2  -4 1224.29   52.01
   9  -2  -3   33.61    4.51
   9   2  -3   36.82    4.41
   9   2  -3   31.91    6.85
   9   2  -3   29.78    4.02
   9   2  -2  164.32   17.02
   9  -2  -2  144.29   18.36
   9  -2  -2  160.39   17.66
   9   2  -1    2.57    1.49
  -9   2   1    6.43    1.61
  -9  -2   1    7.37    1.74
  -9  -2   1    6.01    2.98
   9   2  -1    8.32    3.71
   9  -2  -1    7.77    4.58
   9   2  -1    4.81    1.72
   9   2  -1    4.92    1.75
   9  -2  -1    1.92    1.71
   9   2  -1    4.34    1.82
   9   2  -1    3.35    3.25
   9  -2   0   87.69    7.56
   9   2   0   70.15    6.44
   9   2   0   79.08    6.44
  -9   2   0   94.48    6.51
  -9  -2   0   89.31    6.71
   9  -2   0   93.08   13.77
   9   2   0   95.00   12.07
  -9  -2   0  115.61   12.48
   9   2   0   86.55    6.64
   9   2   0   56.72    5.88
   9   2   0   59.79   11.84
   9  -2   0   82.62    7.38
   9   2   0   83.00    6.54
  -9   2  -1  158.07    9.75
  -9  -2  -1  169.82   10.66
   9   2   1  177.87   17.66
   9  -2   1  200.97   21.29
  -9  -2  -1  166.34   16.90
   9   2   1  167.31   10.47
   9  -2   1  164.53   11.53
   9   2   1  176.95   10.78
   9   2   1  176.89   10.67
   9  -2   1  176.39   11.72
   9   2   2  433.75   20.89
   9   2   2  421.64   20.72
   9  -2   2  392.89   21.54
   9   2   2  442.57   21.12
   9  -2   2  392.47   21.69
  -9   2  -2  363.96   19.19
  -9  -2  -2  391.48   20.61
   9   2   3   84.43    7.31
   9   2   3   98.06    7.70
   9  -2   3  101.81    8.54
   9   2   3   93.42    7.62
   9  -2   3   95.55    8.46
  -9  -2  -3   74.97    7.41
   9   2   4  362.07   19.11
   9   2   4  384.51   19.30
   9  -2   4  394.52   20.65
   9   2   4  364.94   19.19
   9  -2   4  370.62   20.43
   9   2   5   52.65    5.43
   9   2   5   55.62    5.66
   9  -2   5   52.46    6.27
   9   2   5   55.65    5.59
   9  -2   5   49.46    6.03
   9   2   6  443.00   21.39
   9   2   6  474.54   21.60
   9  -2   6  437.42   22.06
   9   2   6  476.98   21.78
   9  -2   6  419.01   22.05
   9   2   7   29.69    2.92
   9  -3 -10  286.31   15.40
   9   3 -10  276.36   14.76
   9   3 -10  266.06   14.29
   9  -3 -10  260.51   14.49
   9  -3  -9  228.55   13.99
   9   3  -9  190.92   12.53
   9  -3  -8 1756.40   74.73
   9  -3  -8 1807.68   77.05
   9   3  -8 1825.64   75.60
   9   3  -7  142.38   10.32
   9  -3  -7  140.24    9.83
   9   3  -6  343.95   18.24
   9   3  -6  317.03   17.66
   9   3  -5  156.07    9.87
   9  -3  -5  122.84    8.78
   9   3  -5  123.95    9.14
   9   3  -5  166.01   16.57
   9  -3  -5  100.83   13.92
   9  -3  -4  346.41   20.07
   9   3  -4  310.27   17.97
   9  -3  -4  336.77   18.71
   9   3  -4  387.17   18.92
   9   3  -4  365.15   18.33
   9  -3  -4  372.24   17.99
   9   3  -4  343.19   18.40
   9   3  -4  421.01   27.48
   9  -3  -4  319.69   26.17
   9  -3  -3   42.79    6.20
   9  -3  -3   49.58    5.62
   9   3  -3   62.27    5.56
   9   3  -3   47.41    8.06
   9  -3  -3   46.97    9.96
   9   3  -3   41.73    4.76
   9  -3  -2 1695.59   74.61
   9   3  -2 2022.33   73.99
   9   3  -2 1836.87   84.43
   9  -3  -2 1824.03   89.71
   9   3  -2 1908.32   74.63
   9  -3  -2 1840.89   77.13
   9   3  -1   82.81   12.10
   9  -3  -1   73.33    7.09
   9   3  -1   95.00    6.67
  -9  -3   1  104.86   11.27
   9   3  -1  117.38   12.55
   9  -3  -1   83.04   12.95
   9   3  -1   81.81    7.05
   9   3  -1   83.66    6.45
   9   3  -1   70.63    6.47
   9  -3  -1   88.81    8.61
   9   3   0   17.85    3.21
   9   3   0   22.13    3.13
   9  -3   0   18.31    3.70
   9   3   0   17.52    2.87
  -9  -3   0   21.32    5.60
   9  -3   0   20.27    4.31
   9   3   0   18.57    5.36
   9  -3   0   11.71    5.41
   9  -3   0   20.09    3.83
   9   3   0   18.58    2.93
   9   3   0   13.25    2.92
   9   3   1   55.83    5.24
   9  -3   1   42.68    5.65
   9   3   1   29.94    4.55
  -9  -3  -1   41.39    8.22
   9   3   1   48.87    8.83
   9  -3   1   59.22   11.75
   9   3   1   46.56    4.88
   9  -3   1   49.88    5.98
   9   3   1   43.95    4.72
   9  -3   1   56.35    6.76
  -9  -3  -2    7.78    2.49
   9  -3   2    4.78    2.74
   9   3   2    7.15    2.17
   9   3   2    6.65    2.32
   9  -3   2    8.23    2.95
   9   3   2    5.92    2.04
   9  -3   2    5.06    2.42
  -9  -3  -3   16.39    3.43
   9  -3   3   16.92    4.03
   9   3   3    9.63    2.61
   9  -3   3   15.90    3.76
   9   3   3   15.38    2.98
   9  -3   3   16.72    3.74
   9   3   3   12.74    2.98
  -9  -3  -4  129.69   10.30
   9   3   4  143.70    9.70
   9  -3   4  148.75   11.38
   9   3   4  143.51    9.84
   9  -3   4  144.50   11.36
   9   3   4  146.74    9.91
   9  -3   5    1.19    2.41
   9   3   5    0.28    1.54
   9   3   5   -0.28    1.75
   9  -3   5    0.80    1.90
   9   3   5   -0.54    1.99
   9  -3   5    0.78    2.27
   9   3   6   87.17    6.50
   9   3   6   88.19    6.40
   9  -3   6   96.67    7.47
   9   3   6   94.41    6.60
   9  -3   6   84.27    7.21
   9   4 -10  198.71   11.49
   9  -4 -10  207.00   12.39
   9   4  -9   24.06    3.71
   9  -4  -9   22.58    4.19
   9  -4  -9   20.81    3.49
   9   4  -8  512.63   24.39
   9  -4  -8  500.59   25.90
   9  -4  -8  444.49   23.51
   9  -4  -7  104.56    8.32
   9  -4  -7  120.63   10.20
   9   4  -7  117.67    8.92
   9   4  -6 2182.58   89.83
   9  -4  -5   63.48    5.84
   9   4  -5   59.39    6.03
   9   4  -5   64.96    5.97
   9   4  -4  353.04   17.37
   9   4  -4  317.97   24.00
   9   4  -4  320.70   17.50
   9  -4  -4  357.29   20.47
   9   4  -3  210.06   17.80
   9   4  -3  205.90   12.08
   9  -4  -3  205.11   22.02
  -9   4   3  217.71   19.34
   9  -4  -3  197.19   14.89
   9  -4  -2   25.18    7.93
   9  -4  -2   27.12    5.40
   9   4  -2   18.74    3.40
   9   4  -2   22.79    3.75
   9   4  -2   30.52    6.49
   9   4  -1  273.02   22.16
   9   4  -1  255.27   14.96
   9   4  -1  283.16   14.06
   9  -4  -1  299.89   18.37
  -9   4   0  195.88   18.76
   9   4   0  174.15   12.34
   9   4   0  253.51   12.59
  -9  -4   0  275.70   20.82
   9   4   0  173.25   12.43
   9  -4   0  265.00   16.81
   9   4   1  165.44   12.15
   9   4   1  246.54   12.58
   9  -4   1  264.63   16.39
   9   4   1  161.85   12.54
   9  -4   2  109.87   10.53
   9   4   2  125.43    8.72
  -9  -4  -3  322.07   17.74
   9   4   3  302.97   16.83
   9   4   3  335.56   17.06
   9  -4   3  298.67   19.26
  -9  -4  -4    8.49    2.79
   9   4   4    7.05    2.38
   9  -4   4    4.95    3.24
   9   4   4    6.31    2.05
   9   4   4    7.57    2.15
   9   4   5  197.65   11.66
   9  -4   5  185.91   13.45
   9   4   5  198.39   11.38
   9  -4   6   73.65    6.96
   9   4   6   73.28    5.58
   9   5 -10 1759.55   71.59
   9  -5 -10 1757.65   72.85
   9   5  -9    2.74    1.54
   9  -5  -9    2.57    2.01
   9  -5  -9    3.99    1.86
   9   5  -8  217.57   12.77
   9  -5  -8  220.10   14.62
   9  -5  -8  210.21   14.18
   9  -5  -8  191.29   12.43
   9  -5  -7   11.09    2.78
   9  -5  -7    9.91    3.24
   9   5  -7   12.86    2.88
   9  -5  -6 1053.72   48.01
   9   5  -6 1167.63   48.24
   9   5  -5   44.11    5.21
   9  -5  -4 1970.91   86.65
   9   5  -4 2024.70   82.77
   9  -5  -4 2058.61  101.20
   9  -5  -3   57.03    8.04
   9  -5  -3   53.80   11.22
   9   5  -3   60.21    5.54
  -9   5   3   47.56    9.13
   9  -5  -2   25.00    7.84
   9  -5  -2   34.51    6.86
   9   5  -2   30.93    4.45
   9   5  -2   29.52    4.28
   9   5  -2   35.46    6.80
   9  -5  -1   27.96    6.47
   9   5  -1   16.45    3.41
   9   5  -1   21.05    3.04
   9   5  -1   15.59    3.16
  -9   5   1   20.81    6.05
   9   5   0  308.75   18.53
   9   5   0  388.52   18.02
  -9  -5   0  396.62   26.73
   9   5   0  316.03   18.58
   9  -5   0  418.60   24.22
   9  -5   1    3.65    3.24
   9   5   1    1.82    1.32
   9   5   1    1.18    1.69
   9   5   2    2.51    1.45
   9  -5   2    2.90    3.09
   9  -5   3   53.46    7.70
  -9  -5  -3   65.38    6.23
   9   5   3   59.60    5.73
  -9  -5  -4  188.54   11.82
   9   5   4  167.20   10.57
  -9   5  -4  161.20   11.11
   9  -5   4  163.16   13.71
  -9  -5  -5    0.31    1.71
   9   5   5    2.14    1.41
   9  -5   5    0.50    2.50
   9  -5   6  449.33   22.89
   9   5   6  432.19   19.95
   9   6 -10   79.68    5.61
   9  -6 -10   86.75    6.73
   9   6  -9   29.46    3.66
   9  -6  -9   27.19    4.21
   9  -6  -8  240.36   15.76
   9   6  -8  251.11   13.85
   9  -6  -8  252.44   15.67
   9  -6  -8  241.23   14.23
   9  -6  -7    5.46    2.10
   9  -6  -7    1.32    2.04
   9  -6  -6  834.68   37.69
   9  -6  -5   90.85    7.19
   9   6  -5   80.03    7.21
   9  -6  -4  600.27   31.34
   9   6  -4  556.18   26.61
   9   6  -3  234.20   13.92
   9   6  -3  249.25   13.43
   9  -6  -3  208.88   23.36
   9  -6  -3  239.73   17.96
   9  -6  -2   -1.42    2.39
   9  -6  -2    2.99    3.97
   9   6  -2   -0.23    1.32
   9   6  -2    0.35    1.61
   9   6  -2    1.86    1.84
   9   6  -1  231.74   14.03
   9   6  -1  206.19   13.07
   9  -6  -1  235.30   19.08
   9   6  -1  221.88   12.27
   9   6   0  221.80   14.14
   9   6   0  229.15   14.11
   9  -6   0  266.56   19.93
   9   6   0  248.00   13.13
   9   6   1  809.49   39.88
   9   6   1  939.91   38.90
   9  -6   1  904.41   45.92
   9   6   2   29.97    3.92
   9  -6   2   32.77    6.66
   9   6   3  211.53   12.15
   9  -6   3  175.37   15.89
  -9  -6  -3  212.54   12.56
   9   6   4    3.04    1.64
   9  -6   4   11.29    4.68
  -9   6  -4    5.02    1.91
  -9  -6  -4    9.78    2.53
  -9  -6  -5  192.10   11.26
   9  -6   5  191.32   14.56
   9   6   5  166.25   10.05
   9  -6   6   94.27    8.54
   9   6   6   98.13    6.04
   9  -7 -10  307.80   15.44
   9  -7  -9   53.20    5.49
   9  -7  -8 2183.31   86.99
   9  -7  -8 2089.13   86.03
   9  -7  -8 1939.95   84.60
   9  -7  -7   21.65    4.30
   9  -7  -7   20.76    4.10
   9  -7  -7   30.15    4.27
   9  -7  -6  323.38   17.72
   9  -7  -6  337.52   19.17
  -9   7   5   53.74    5.64
   9  -7  -4   25.64    5.62
   9   7  -4   31.07    4.03
   9   7  -3  164.50   11.15
   9  -7  -3  183.73   15.77
   9   7  -3  196.96   11.05
   9   7  -2 1644.57   66.45
  -9   7   2 1622.29   64.79
   9   7  -2 1496.29   65.12
   9  -7  -2 1397.69   72.79
   9   7  -2 1525.76   64.01
   9   7  -1   85.37    7.54
   9   7  -1   77.98    6.90
   9  -7  -1   85.11   12.30
   9  -7   0   50.01    9.21
   9   7   0   36.93    4.78
   9   7   0   42.59    4.37
   9   7   0   50.37    5.52
   9   7   1    1.23    1.20
   9  -7   1    2.35    3.73
   9   7   1   -0.35    1.39
   9   7   2   12.20    2.57
   9  -7   2   11.30    5.01
   9   7   3   12.87    2.62
   9  -7   3    9.33    5.00
  -9   7  -3   11.80    2.74
  -9  -7  -3   16.18    2.83
  -9  -7  -4  220.00   12.34
   9   7   4  207.91   11.61
  -9   7  -4  184.55   12.01
   9  -7   4  208.11   17.56
  -9  -7  -5   19.14    2.95
   9   7   5   21.28    2.74
   9  -7   5   27.65    6.04
   9  -7   6   73.67    7.53
   9   7   6   50.16    3.79
   9  -8  -9   11.77    2.82
   9  -8  -9   11.08    2.41
   9  -8  -8  436.98   22.67
   9  -8  -8  469.41   23.75
   9  -8  -7    7.45    2.55
   9  -8  -7    8.13    2.58
   9  -8  -7    9.23    2.96
   9  -8  -6 1506.80   61.37
   9  -8  -6 1354.91   62.08
  -9   8   5    0.63    1.36
   9  -8  -4 1205.61   54.63
  -9   8   4 1124.09   49.85
   9   8  -3   67.52    6.12
   9  -8  -3   62.56    9.04
  -9   8   3   70.77    6.44
  -9   8   2  380.59   19.01
   9   8  -2  342.92   18.84
   9  -8  -2  337.73   25.20
  -9   8   2  411.80   19.82
   9   8  -1  465.43   23.10
  -9   8   1  464.84   22.35
   9   8  -1  411.00   21.89
   9  -8  -1  459.15   31.09
   9  -8   0   19.26    6.42
   9   8   0   20.65    3.52
   9   8   0   22.85    3.87
  -9   8   0   29.87    4.02
   9   8   1   26.88    4.11
  -9   8  -1   35.79    4.47
   9  -8   1   38.49    8.06
  -9   8  -2   48.32    4.97
   9  -8   2   27.04    7.14
  -9   8  -3  427.88   22.25
   9  -8   3  419.32   29.06
  -9  -8  -3  489.85   22.05
  -9   8  -4  152.84   10.16
   9  -8   4  146.95   15.37
  -9  -8  -4  167.94    9.91
   9  -8   5  109.49   11.71
  -9  -8  -5  127.43    7.83
   9  -8   6  384.46   21.62
   9  -9  -9  208.22   12.20
   9  -9  -8  342.27   19.39
  -9   9   8  310.26   17.61
   9  -9  -7  108.34    9.02
   9  -9  -6  101.48    8.02
   9  -9  -6   95.37    8.44
  -9   9   5  204.28   12.77
  -9   9   4 1237.76   53.45
   9   9  -3   41.32    4.72
   9  -9  -3   53.57    7.83
  -9   9   3   48.14    5.24
  -9   9   2  325.52   17.14
   9   9  -2  336.16   17.22
   9  -9  -2  298.86   22.65
  -9   9   2  304.33   17.15
  -9   9   1  226.17   13.53
   9  -9  -1  214.78   19.92
   9   9  -1  236.76   13.49
   9   9   0  153.49   10.31
  -9   9   0  130.51    9.67
   9   9   0  140.18    9.68
   9  -9   0  128.59   14.80
   9   9   1   13.38    2.95
  -9   9  -1   17.63    3.19
  -9   9  -2    4.59    1.89
  -9   9  -2    3.69    1.66
   9  -9   2   -0.84    4.37
  -9  -9  -3   36.35    3.91
  -9   9  -3   35.42    4.33
   9  -9   3   35.56    8.37
  -9  -9  -4   37.95    3.91
  -9   9  -4   36.37    4.29
   9  -9   4   46.50    9.01
  -9  -9  -5    5.57    1.45
  -9   9  -5    5.62    1.76
   9  -9   5    6.49    3.72
   9 -10  -9   11.30    2.28
   9 -10  -8  243.17   14.71
  -9  10   8  250.61   13.95
   9 -10  -7    3.04    2.24
   9 -10  -6 1278.06   55.93
  -9  10   6 1291.29   55.33
  -9  10   5   77.31    6.92
   9 -10  -5   79.43    7.51
  -9  10   4   94.58    7.56
   9  10  -4   74.70    6.34
  -9  10   3    3.51    1.71
   9 -10  -3    4.84    3.63
   9  10  -3    6.78    2.07
  -9  10   2   42.96    4.99
   9  10  -2   45.21    4.89
  -9  10   2   45.73    5.00
   9 -10  -2   42.02    7.54
  -9  10   1    4.18    2.10
   9  10  -1    4.00    1.90
   9 -10  -1    6.48    4.31
   9  10   0  636.24   29.31
  -9  10   0  612.70   29.22
   9 -10   0  546.96   35.29
   9  10   0  606.90   28.44
   9  10   1  203.43   12.05
  -9  10  -1  180.98   11.66
  -9  10  -1  186.19   11.76
   9 -10   2  300.02   22.75
  -9  10  -2  304.44   16.53
  -9  10  -3    5.31    1.86
   9 -10   3   10.18    5.44
  -9 -10  -4  198.72   10.36
  -9  10  -4  169.88   10.87
   9 -10   4  220.75   17.63
  -9 -10  -5    2.08    0.92
   9 -10   5    3.43    3.45
  -9  11   8  480.15   22.12
   9 -11  -8  438.87   22.26
  -9  11   7  135.29    9.24
   9 -11  -7  143.64    9.75
   9 -11  -6   61.40    6.01
  -9  11   6   39.76    4.84
  -9  11   5  160.17   10.72
   9  11  -4  250.71   13.52
  -9  11   4  246.45   14.52
   9  11  -3  993.99   43.12
  -9  11   3 1003.49   44.21
   9  11  -2  206.87   11.92
  -9  11   2  187.57   12.03
  -9  11   2  193.59   12.19
   9 -11  -1    4.55    5.08
   9  11  -1    5.24    1.84
  -9  11   1    5.58    2.15
   9  11   0   77.91    6.44
   9 -11   0   68.14   10.27
   9  11   0   78.70    6.82
  -9  11   0   70.55    6.73
  -9  11  -1    7.84    2.32
   9  11   1    7.31    2.22
  -9  11  -2   32.62    4.13
   9 -11   3  101.61   11.54
  -9  11  -3   72.37    6.23
  -9 -11  -4   38.84    3.41
  -9  11  -4   36.05    4.03
  -9  11  -5   84.31    6.02
  -9  12   8  123.44    7.57
   9 -12  -8   97.98    7.17
  -9  12   7    0.25    1.15
  -9  12   6  610.48   29.49
  -9  12   6  691.36   30.32
  -9  12   5   21.28    3.50
   9  12  -4  623.78   28.40
  -9  12   4  649.01   30.01
   9  12  -3   17.69    2.89
  -9  12   3   14.25    3.08
   9 -12  -2  329.32   23.30
   9  12  -2  373.30   18.35
   9 -12  -1   15.44    6.86
   9  12  -1   13.96    2.65
  -9  12   1   13.84    3.01
   9  12   0  122.16    8.53
  -9  12   0  101.46    8.36
   9  12   0  120.34    8.06
   9 -12   0   92.23   12.25
  -9  12  -1  375.53   20.05
   9 -12   1  341.83   24.66
  -9  12  -2  162.97   10.39
  -9  12  -3    1.00    1.12
  -9 -12  -4  174.23    8.24
  -9  12  -4  128.48    8.87
  -9  13   7  309.18   14.77
   9 -13  -7  253.67   14.43
  -9  13   6  118.63    8.19
  -9  13   6  119.70    8.32
  -9  13   5  339.86   17.91
   9  13  -4  168.88    9.60
  -9  13   4  156.85   10.60
   9 -13  -3    0.40    2.35
   9  13  -3    2.02    1.41
  -9  13   3    0.93    1.42
   9 -13  -2  661.67   34.41
   9  13  -2  662.75   29.68
   9  13  -1  347.94   16.81
   9 -13  -1  281.90   21.45
   9  13   0    3.37    1.61
   9 -13   0    2.91    4.16
   9  13   1   12.10    2.39
   9 -13   1    8.54    4.95
  -9  13  -2    1.61    1.46
   9 -13   2    2.53    4.05
  -9  13  -3   42.09    4.66
   9 -13   3   48.25    6.92
  -9  14   7   10.86    1.96
  -9  14   6  624.48   28.24
  -9  14   6  640.57   28.40
  -9  14   5    0.26    1.22
  -9  14   4  208.43   12.71
   9  14  -4  227.94   11.57
  -9  14   3  162.04   10.51
   9 -14  -3  147.09   10.54
   9  14  -3  173.12    9.52
   9  14  -2   51.26    4.58
   9 -14  -2   52.38    6.46
   9 -14  -1  365.31   23.52
   9  14  -1  450.17   20.04
   9  14   0  565.46   24.61
   9 -14   0  461.38   29.07
   9  14   1   12.99    2.20
   9 -14   1   13.47    5.12
   9 -14   2  102.96   10.58
  -9  14  -3  218.18   11.97
   9 -14   3  180.60   12.99
  -9  15   6  125.25    7.56
  -9  15   5    8.16    2.06
   9  15  -4  835.06   34.50
  -9  15   4  799.60   36.09
   9 -15  -3  277.50   15.20
   9  15  -3  306.82   14.33
   9  15  -2   44.02    4.12
   9  15  -2   47.63    4.05
   9 -15  -2   45.88    5.22
   9  15  -1    1.93    1.20
   9  15  -1    5.44    1.55
   9 -15  -1    6.98    3.00
   9 -15   0  146.42   11.83
   9  15   0  168.24    9.12
   9 -15   1   10.83    3.74
   9 -15   2   -0.36    3.10
  -9  16   5  114.86    7.10
   9  16  -4  160.78    8.28
  -9  16   4  165.48    9.55
   9  16  -3   18.06    2.21
   9 -16  -3   15.77    2.52
   9  16  -2    2.43    0.96
   9  16  -2    0.70    0.92
   9 -16  -2    0.86    1.41
   9  16  -1   10.80    1.91
   9  16  -1   11.87    1.78
   9 -16  -1   14.18    2.92
   9 -16   0   98.08    7.63
   9  16   0   98.79    5.92
   9 -16   1  692.96   31.23
   9  17  -3  124.27    6.52
   9 -17  -2  299.23   13.49
   9  17  -2  329.37   12.95
   9 -17  -1   52.57    4.28
   9  17  -1   51.22    3.63
  10   0 -10  241.72   13.19
  10   0 -10  230.60   13.01
  10   0  -9    0.97    1.68
  10   0  -8   52.62    6.02
  10   0  -8   58.18    5.77
  10   0  -7   -0.39    1.85
  10   0  -7    3.57    1.85
  10   0  -6    2.69    1.99
  10   0  -6    1.92    1.79
  10   0  -5    0.36    1.71
  10   0  -5    0.61    1.50
  10   0  -4  408.80   20.45
  10   0  -4  399.27   21.32
  10   0  -3    5.22    2.24
  10   0  -2  278.05   15.63
  10   0  -1   -0.31    1.47
 -10   0   1    1.47    1.20
  10   0  -1    1.07    2.84
  10   0   0   22.92    3.78
 -10   0   0   30.28    4.01
  10   0   1   -0.34    1.36
  10   0   1    0.34    1.65
 -10   0  -1    0.93    1.34
  10   0   2 2723.07  110.45
  10   0   2 2722.51  110.11
 -10   0  -2 2646.32  109.58
  10   0   3    0.68    2.01
  10   0   3    1.38    1.59
  10   0   4   32.18    4.43
  10   0   4   33.61    4.58
  10   0   5    0.82    1.42
  10   0   5    0.28    1.34
  10   0   6   12.34    2.31
  10   0   6   12.85    2.25
  10   1 -10  227.03   12.86
  10   1 -10  231.44   12.75
  10  -1 -10  234.06   12.95
  10   1  -9  249.28   14.96
  10  -1  -9  280.87   15.34
  10   1  -8   39.48    5.26
  10  -1  -8   50.40    5.72
  10  -1  -8   51.87    5.73
  10  -1  -8   40.71    4.94
  10   1  -7  210.44   13.03
  10  -1  -7  208.89   13.78
  10   1  -7  218.44   13.92
  10  -1  -6   63.76    6.13
  10   1  -6   55.52    5.94
  10   1  -6   65.03    6.90
  10  -1  -6   59.26    6.85
  10  -1  -5  424.45   21.25
  10   1  -5  406.14   21.26
  10   1  -5  442.08   22.26
  10  -1  -5  404.98   22.14
  10   1  -4   11.69    3.00
  10   1  -4   15.81    3.34
  10  -1  -4   12.30    3.17
  10  -1  -4   14.66    2.79
  10   1  -4   11.45    2.70
  10   1  -3  151.11   10.39
  10   1  -3  176.54   10.88
  10  -1  -3  158.32   11.10
  10   1  -3  176.71   11.16
  10  -1  -2 1082.96   48.97
  10   1  -2 1153.16   48.54
  10   1  -1   97.14    7.83
  10   1  -1   96.23   12.99
  10  -1  -1  127.34   15.63
 -10   1   1  107.32    7.44
 -10  -1   1  110.23    7.67
  10  -1  -1  109.48    8.76
  10   1  -1  108.74    8.05
  10   1   0  712.04   33.05
  10  -1   0  757.22   34.26
  10   1   0  727.87   33.30
 -10   1   0  717.16   32.71
 -10  -1   0  725.30   33.18
  10   1   1   77.60    6.84
  10   1   1   90.10    7.43
  10  -1   1   87.47    7.80
  10  -1   1   79.10    7.43
  10   1   1   88.80    7.38
 -10   1  -1   77.03    6.67
 -10  -1  -1   79.45    7.12
  10   1   2   26.58    3.90
  10  -1   2   23.19    4.18
  10   1   2   24.86    4.02
  10  -1   2   26.61    4.39
  10   1   2   22.99    4.04
 -10   1  -2   18.33    3.22
 -10  -1  -2   20.02    3.68
  10   1   3   55.06    5.70
  10  -1   3   58.76    6.24
  10   1   3   62.50    6.00
  10   1   3   51.09    5.51
  10  -1   3   58.47    6.12
  10   1   4  931.20   40.95
  10  -1   4  896.00   41.65
  10   1   4  946.37   41.37
  10   1   4  914.84   41.05
  10  -1   4  952.73   41.81
  10   1   5    6.12    1.95
  10  -1   5    6.42    2.04
  10   1   5    7.17    2.13
  10  -1   5    6.84    2.36
  10   1   5    5.70    1.92
  10   1   6  828.69   35.88
  10  -1   6  863.75   36.52
  10   1   6  884.26   36.32
  10  -1   6  826.90   36.52
  10   1   6  873.68   36.43
  10   2 -10   91.44    6.77
  10  -2 -10   91.64    6.70
  10   2 -10   93.29    6.61
  10  -2 -10   76.49    6.36
  10  -2  -9   22.20    3.76
  10   2  -9   19.49    3.41
  10   2  -8    8.66    2.64
  10  -2  -8   15.55    3.55
  10  -2  -8   11.36    2.72
  10   2  -7    1.31    1.61
  10   2  -7    2.91    1.89
  10  -2  -7    2.64    2.06
  10   2  -6    5.66    2.22
  10  -2  -6    9.71    2.56
  10   2  -6    4.57    2.23
  10  -2  -6    5.01    2.44
  10   2  -5   26.78    4.03
  10  -2  -5   16.98    3.20
  10   2  -5   24.32    3.83
  10  -2  -5   12.74    3.30
  10  -2  -4   64.05    5.90
  10   2  -4   64.31    6.29
  10  -2  -4   70.70    7.06
  10   2  -4   82.20    7.02
  10   2  -4   61.48    6.14
  10   2  -3   20.10    3.43
  10  -2  -3   22.83    4.09
  10   2  -3   23.44    3.60
  10   2  -3   20.58    3.47
  10   2  -2  252.58   14.44
  10   2  -2  217.03   13.62
  10  -2  -2  226.16   14.47
  10   2  -2  265.42   13.97
 -10   2   1  118.99    7.76
 -10  -2   1  115.31    8.04
  10   2  -1  115.13   13.73
  10  -2  -1  118.20   16.06
  10   2  -1  110.24    8.08
  10  -2  -1  103.61    8.80
  10   2  -1  109.14    8.02
  10   2  -1  109.71    8.73
  10   2   0 1632.62   69.15
  10  -2   0 1609.75   70.63
  10   2   0 1606.96   69.09
 -10   2   0 1701.56   69.01
 -10  -2   0 1769.62   70.01
  10   2   1  243.60   13.92
  10  -2   1  243.12   15.21
  10   2   1  249.45   14.25
  10  -2   1  226.60   14.70
  10   2   1  234.25   13.86
 -10  -2  -1  254.43   14.70
  10   2   2  405.84   20.49
  10  -2   2  400.45   21.76
  10   2   2  386.67   20.53
  10  -2   2  413.70   21.76
  10   2   2  407.13   20.58
 -10  -2  -2  394.51   21.32
  10   2   3   28.28    3.91
  10  -2   3   33.27    4.73
  10   2   3   23.39    3.81
  10   2   3   27.08    3.82
  10  -2   3   29.03    4.35
  10   2   4 1077.09   45.52
  10  -2   4 1055.42   46.61
  10   2   4 1018.49   45.26
  10  -2   4 1031.83   46.67
  10   2   4 1048.50   45.56
  10  -2   5   53.31    5.51
  10   2   5   61.24    5.22
  10   2   5   54.10    5.07
  10  -2   5   56.97    5.72
  10   2   5   57.30    5.19
  10  -2   6  409.33   19.90
  10   2   6  449.68   19.71
  10   2   6  449.78   19.58
  10  -2   6  397.66   19.94
  10   2   6  445.28   19.74
  10  -3 -10    3.64    1.69
  10   3 -10    3.12    1.30
  10  -3 -10    7.51    2.03
  10   3 -10    7.12    1.94
  10   3  -9   61.24    5.80
  10  -3  -9   54.97    6.02
  10  -3  -9   59.15    5.62
  10   3  -8  586.81   27.46
  10  -3  -8  615.47   29.11
  10  -3  -7  127.88    9.43
  10   3  -7  140.71   10.01
  10   3  -6  284.70   16.78
  10   3  -6  323.98   17.32
  10  -3  -5  113.21    8.68
  10   3  -5  121.93    9.28
  10   3  -5  131.32    9.16
  10   3  -4  465.63   23.47
  10  -3  -4  454.99   24.67
  10   3  -4  504.92   23.55
  10   3  -4  478.61   24.12
  10  -3  -4  451.82   24.28
  10   3  -4  527.69   24.20
  10   3  -3  116.93    8.47
  10  -3  -3  125.06    9.70
  10   3  -3  139.15    9.02
  10  -3  -2   49.47    6.01
  10   3  -2   55.62    5.33
  10   3  -2   55.25    5.90
  10  -3  -2   42.42   10.23
  10   3  -2   50.49    5.62
  10  -3  -2   54.45    6.80
  10  -3  -1  174.56   12.48
  10   3  -1  209.94   11.60
  10   3  -1  166.56   11.97
 -10  -3   1  206.70   11.63
  10   3  -1  244.52   19.81
  10   3  -1  204.02   11.57
  10   3  -1  140.96   11.14
  10  -3  -1  209.49   14.40
  10   3   0  939.62   39.03
  10  -3   0  913.70   41.03
  10   3   0  957.18   39.01
 -10  -3   0  913.36   39.53
  10   3   1  101.40    7.56
  10  -3   1   85.95    8.43
  10   3   1   93.62    7.44
  10  -3   1  100.33    8.83
  10   3   1   92.71    7.38
 -10  -3  -1   90.29    7.93
  10   3   2  297.75   15.86
  10  -3   2  286.37   17.30
  10   3   2  278.62   15.65
  10  -3   2  294.66   17.35
  10   3   2  293.64   15.78
 -10  -3  -2  266.87   16.48
  10   3   3    3.48    1.66
  10  -3   3    4.12    2.64
  10   3   3    1.75    1.52
  10  -3   3    2.82    2.25
  10   3   3    5.13    1.89
 -10  -3  -3    2.98    1.85
  10   3   4  946.38   41.30
  10  -3   4  922.43   43.06
  10   3   4  960.08   41.41
  10  -3   4  962.00   43.12
  10   3   4  945.15   41.15
  10   3   5   36.48    3.98
  10  -3   5   33.85    4.47
  10   3   5   36.27    3.88
  10  -3   5   35.75    4.53
  10   3   5   38.67    3.95
  10   3   6  357.35   16.21
  10  -3   6  330.96   16.65
  10   3   6  361.48   16.12
  10  -3   6  342.05   16.85
  10   3   6  354.41   16.16
  10   4 -10  312.65   15.19
  10  -4 -10  300.85   15.81
  10   4  -9    6.61    2.24
  10  -4  -9    6.86    2.59
  10  -4  -9    5.40    1.99
  10   4  -8    2.10    1.78
  10  -4  -8    2.93    2.29
  10  -4  -8    2.72    1.84
  10  -4  -7   67.72    6.42
  10  -4  -7   65.38    7.57
  10   4  -7   75.71    6.68
  10   4  -6   18.89    3.53
  10   4  -6   25.40    3.84
  10   4  -5    2.41    1.93
  10   4  -5    1.71    1.48
  10   4  -4  249.21   13.77
  10   4  -4  242.87   14.77
  10   4  -4  247.21   14.15
  10  -4  -4  246.48   15.89
  10   4  -3   97.26    7.36
  10  -4  -3   91.03    9.16
  10  -4  -2    8.02    3.49
  10   4  -2    5.75    1.87
  10   4  -2    5.06    2.20
  10   4  -2    5.46    2.30
  10   4  -1  272.31   13.73
  10  -4  -1  299.72   18.57
 -10  -4   0  171.21   10.56
  10   4   0  122.55   10.05
  10   4   0  171.11   10.06
  10   4   0  108.70    9.60
  10  -4   0  179.56   13.90
  10   4   1  228.71   12.81
  10  -4   1  264.71   16.77
 -10  -4  -1  241.64   13.68
 -10  -4  -2 1689.23   71.34
  10   4   2 1674.74   69.76
  10   4   2 1670.95   69.89
  10   4   2 1700.95   69.73
  10  -4   2 1648.69   73.42
 -10  -4  -3  160.82   10.48
  10   4   3  143.95    9.79
  10   4   3  158.14    9.90
  10  -4   3  151.46   12.17
  10   4   3  164.46   10.30
  10   4   4  150.64    9.69
  10   4   4  167.18   10.13
  10   4   4  161.91    9.81
  10  -4   4  173.72   12.38
  10  -4   5  233.80   14.34
  10   4   5  233.43   12.43
  10   4   6    4.66    1.23
  10   5 -10  766.31   32.49
  10  -5 -10  762.43   33.58
  10   5  -9    6.09    1.97
  10  -5  -9    7.96    2.63
  10  -5  -9    7.39    2.23
  10   5  -8   62.24    5.61
  10  -5  -8   58.13    6.75
  10  -5  -8   65.23    6.95
  10  -5  -8   45.65    5.27
  10  -5  -7    1.57    1.68
  10  -5  -7    1.34    2.06
  10   5  -7    1.43    1.56
  10  -5  -6  452.27   23.02
  10   5  -6  438.58   23.03
  10   5  -6  495.41   22.88
  10   5  -5   34.81    4.84
  10  -5  -4   84.06    8.95
  10   5  -4  103.18    7.70
  10   5  -3   44.16    5.42
  10  -5  -3   61.03    7.95
  10   5  -3   56.31    5.27
  10   5  -2 2087.82   87.26
  10   5  -2 2130.79   85.16
  10   5  -2 1985.39   86.65
  10  -5  -2 2194.18   92.50
  10   5  -1    7.07    2.03
  10  -5  -1    5.60    4.25
  10   5  -1    5.63    2.29
  10   5  -1    6.82    2.41
  10   5   0  450.37   24.36
  10   5   0  511.10   23.33
  10   5   0  428.82   23.92
  10   5   1    9.48    2.26
  10   5   1    2.69    1.90
  10  -5   1    2.51    3.08
  10   5   2   21.29    3.43
  10  -5   2   36.62    6.42
 -10  -5  -2   33.56    4.50
  10   5   3   10.47    2.37
  10  -5   3    9.42    4.03
 -10  -5  -3   11.57    2.55
 -10  -5  -4  746.79   32.34
  10   5   4  678.35   31.37
 -10   5  -4  697.57   33.09
  10  -5   4  752.31   36.15
  10   5   5    3.29    1.34
  10  -5   5    3.12    2.59
  10  -6 -10  150.50    9.13
  10  -6  -9   20.85    3.51
  10  -6  -8   78.03    7.67
  10  -6  -8   83.23    7.74
  10  -6  -8   63.13    6.20
  10  -6  -7  119.62    9.06
  10  -6  -7  135.87   10.70
  10  -6  -6   11.58    2.85
  10   6  -5   48.96    5.70
 -10   6   5   72.65    6.52
  10  -6  -4  303.49   20.58
  10   6  -4  366.41   17.99
  10   6  -3   93.28    7.86
  10  -6  -3   85.24   10.17
  10   6  -3   97.76    7.22
  10   6  -2   23.92    3.98
  10   6  -2   15.03    3.29
  10  -6  -2   15.79    5.83
  10   6  -2   14.82    2.80
  10   6  -1  298.20   17.27
  10   6  -1  285.40   16.68
  10   6   0  517.46   26.88
  10   6   0  527.02   26.74
  10   6   0  557.31   25.62
  10   6   1  269.21   14.63
  10   6   1  274.07   16.10
  10  -6   1  270.40   20.37
  10  -6   2 1517.00   69.24
  10   6   2 1435.87   61.97
 -10  -6  -2 1540.93   63.10
  10  -6   3  285.08   19.53
  10   6   3  251.07   13.89
  10   6   4  202.32   11.23
 -10  -6  -4  220.99   11.81
 -10   6  -4  179.69   12.10
  10  -6   4  218.39   16.03
  10  -6   5  179.65   12.91
  10   6   5  176.25    9.48
  10  -7  -9   63.64    5.88
  10  -7  -8  659.76   30.89
  10  -7  -8  669.80   30.52
  10  -7  -8  576.08   28.82
  10  -7  -7    3.75    1.90
  10  -7  -7    3.67    2.43
  10  -7  -6  155.84   10.59
  10  -7  -6  165.73   11.90
  10   7  -5  157.60   10.83
 -10   7   5  169.63   11.17
 -10   7   4  518.85   25.61
  10  -7  -4  523.79   29.21
  10   7  -4  532.33   24.78
  10   7  -3  193.25   12.33
  10   7  -3  201.29   11.59
  10  -7  -3  202.27   16.39
  10  -7  -2   12.64    5.23
  10   7  -2   12.70    2.53
  10   7  -2   12.85    2.92
  10   7  -2   15.07    3.32
 -10   7   2   10.19    2.33
  10  -7  -1   -1.94    5.87
  10   7  -1    1.07    1.41
  10   7  -1    2.91    1.93
  10   7   0 1102.72   48.18
  10   7   0 1058.68   46.32
  10   7   0 1078.17   47.81
  10  -7   0 1187.00   58.21
  10   7   1   33.80    4.00
  10  -7   1   31.66    7.47
  10   7   1   37.10    4.88
  10   7   2   41.28    4.33
 -10   7  -2   36.47    4.33
  10  -7   2   31.21    7.28
  10   7   3   32.87    3.79
  10  -7   3   41.89    8.12
 -10   7  -3   30.31    4.16
 -10  -7  -3   44.53    4.60
 -10  -7  -4  712.94   30.46
  10   7   4  661.30   29.91
 -10   7  -4  661.58   31.59
  10   7   5    5.75    1.32
  10  -7   5    6.98    3.37
  10  -8  -9    2.05    1.49
  10  -8  -8   30.17    4.26
  10  -8  -8   31.00    4.62
  10  -8  -7    8.35    2.87
  10  -8  -7    7.13    2.52
  10  -8  -7    6.13    2.24
  10  -8  -6   45.53    5.77
 -10   8   5   32.02    4.38
 -10   8   4   27.98    4.07
 -10   8   3  268.57   16.16
  10   8  -3  307.34   16.44
  10  -8  -3  333.91   21.62
  10   8  -2  172.80   11.43
 -10   8   2  168.82   10.82
 -10   8   2  161.91   11.12
  10   8  -2  175.81   11.18
  10  -8  -2  177.21   17.09
  10   8  -2  168.01   10.11
  10   8  -1  137.53    9.74
 -10   8   1  133.68    9.42
  10   8  -1  113.84    8.87
  10  -8  -1  112.54   14.81
  10   8  -1  122.45    8.13
  10   8   0 1134.55   49.37
 -10   8   0 1200.66   49.72
  10   8   0 1069.10   48.71
  10  -8   0 1073.31   58.72
 -10   8  -1   97.01    7.78
  10   8   1   95.60    7.77
  10  -8   1   70.87   11.31
  10   8   1   90.37    6.79
  10   8   2  423.14   19.77
 -10   8  -2  417.27   20.91
 -10   8  -2  380.62   20.04
  10  -8   2  411.86   28.13
  10   8   3   49.40    4.47
  10  -8   3   58.96   10.06
 -10   8  -3   43.40    4.90
 -10  -8  -3   55.64    4.93
  10   8   4  660.55   28.92
 -10   8  -4  615.21   30.34
 -10  -8  -4  687.79   29.25
  10  -8   5   99.41    9.87
  10  -9  -9   42.91    4.31
  10  -9  -8    3.18    1.98
  10  -9  -8    3.36    2.15
 -10   9   8    2.12    1.52
  10  -9  -7  545.51   26.83
 -10   9   6   37.96    4.75
  10  -9  -6   47.32    5.68
 -10   9   5  407.59   20.97
 -10   9   4    4.19    1.89
  10   9  -3    6.54    2.13
  10  -9  -3    0.62    3.16
 -10   9   3    8.24    2.36
  10   9  -2  732.48   32.17
 -10   9   2  651.13   31.34
  10   9  -2  687.70   31.47
  10  -9  -2  638.51   38.33
 -10   9   2  679.21   32.06
  10   9  -1  116.04    8.74
 -10   9   1  106.11    8.49
  10  -9  -1  101.99   13.91
  10   9  -1  117.61    8.53
  10   9   0  110.95    8.52
 -10   9   0  111.66    8.72
  10  -9   0   94.00   13.43
  10   9   0  115.49    8.44
  10  -9   1  116.94   14.42
 -10   9  -1  109.54    8.53
 -10   9  -1  114.62    8.67
  10   9   1  126.32    8.84
 -10   9  -2   14.42    2.84
 -10   9  -2   13.86    2.71
  10  -9   2   12.24    6.36
 -10   9  -3    2.98    1.55
  10  -9   3   -0.95    5.32
 -10  -9  -3    4.25    1.41
 -10   9  -4  568.09   27.06
 -10  -9  -4  591.49   25.60
  10 -10  -8   19.88    3.50
 -10  10   8   26.28    3.48
  10 -10  -7   43.54    5.05
  10 -10  -6   14.81    3.25
 -10  10   6   13.71    2.80
 -10  10   5   42.20    4.92
  10 -10  -5   38.33    5.09
  10  10  -4  155.41    9.77
 -10  10   4  159.28   10.69
  10  10  -3   10.24    2.55
  10 -10  -3   10.46    3.89
 -10  10   3    8.83    2.49
  10  10  -2    8.39    2.34
 -10  10   2    9.92    2.50
  10 -10  -2    6.16    4.33
  10  10  -2    9.59    2.35
 -10  10   2   10.47    2.58
  10 -10  -1    7.36    5.34
  10  10  -1   13.96    2.83
  10  10  -1    8.63    2.47
 -10  10   1   11.60    2.76
  10 -10   0    9.51    5.56
  10  10   0   14.11    2.82
  10  10   0   12.08    2.83
 -10  10   0   14.04    3.02
  10 -10   1   48.32    9.34
 -10  10  -1   64.75    6.02
 -10  10  -1   57.89    5.75
  10  10   1   61.40    5.71
 -10  10  -2 2234.44   95.65
  10 -10   2 2879.12  110.19
 -10 -10  -3   54.38    4.31
 -10  10  -3   46.55    4.75
  10 -10   3   55.01   10.13
 -10 -10  -4    2.19    0.90
 -10  10  -4    2.36    1.35
  10 -11  -8   45.17    4.74
 -10  11   8   50.76    4.54
  10 -11  -7   60.59    5.60
 -10  11   7   55.90    5.21
  10 -11  -6    3.32    1.86
 -10  11   6   -0.28    1.50
 -10  11   5  292.88   16.05
  10  11  -4   45.04    4.42
 -10  11   4   39.37    4.80
  10  11  -3  563.63   25.90
  10 -11  -3  544.25   29.10
 -10  11   3  556.19   26.92
  10  11  -2  740.01   32.42
 -10  11   2  707.37   32.68
 -10  11   2  706.75   32.87
  10  11  -2  754.83   32.28
  10  11  -1   60.11    5.51
  10  11  -1   66.32    5.90
 -10  11   1   44.78    5.46
  10 -11  -1   50.99    7.99
  10  11   0  542.62   24.27
 -10  11   0  464.35   24.30
  10  11   0  530.17   23.75
 -10  11  -1  110.87    8.51
  10 -11   1  111.40   13.16
  10 -11   1  120.39   13.17
  10 -11   2    9.61    5.95
 -10  11  -2    3.38    1.55
  10 -11   3    6.55    4.90
 -10 -11  -3    5.08    1.27
 -10  11  -3    3.49    1.42
 -10  11  -4  353.64   17.14
 -10  12   7   16.96    2.67
 -10  12   6    2.33    1.48
 -10  12   6   -0.24    1.10
 -10  12   5  138.57    9.38
  10  12  -4    1.26    1.14
 -10  12   4    1.49    1.42
  10  12  -3    1.60    1.19
 -10  12   3    0.92    1.50
  10  12  -2  245.95   13.44
  10  12  -2  255.47   13.81
  10  12  -1   11.04    2.34
  10  12  -1   11.70    2.47
 -10  12   1    9.55    2.63
  10  12   0  799.96   35.19
 -10  12   0  808.69   36.27
  10  12   0  827.40   34.92
 -10  12  -1   21.09    3.31
  10  12   1   19.17    2.92
  10 -12   1   20.71    6.56
 -10  12  -2  273.43   14.87
  10 -12   2  352.93   22.90
 -10  12  -3   18.87    2.79
 -10  12  -3   25.24    3.33
 -10 -12  -3   24.53    2.35
  10 -12   3   25.96    6.24
 -10  13   7  392.14   17.18
  10 -13  -7  321.38   16.95
 -10  13   6   82.63    6.29
 -10  13   6   96.58    6.76
 -10  13   5  135.28    8.96
 -10  13   4  208.82   12.32
  10  13  -4  205.28   10.98
 -10  13   3   27.49    3.82
  10  13  -3   22.44    3.02
  10  13  -2   92.21    6.45
  10  13  -2   74.76    5.94
  10  13  -1  360.51   17.98
  10 -13  -1  334.54   22.26
  10  13   0  388.18   17.92
  10 -13   0  311.34   22.52
  10  13   1    8.80    1.89
  10 -13   1   -0.67    5.05
  10 -13   2   16.83    5.78
 -10  14   6    1.52    1.17
 -10  14   5   59.76    5.18
 -10  14   4  121.75    8.43
  10  14  -4  131.73    7.44
 -10  14   3  224.94   12.77
  10  14  -3  223.35   11.52
  10  14  -2   24.68    2.98
  10  14  -2   26.49    3.04
  10  14  -1   93.58    6.31
  10  14  -1   95.89    6.18
  10 -14  -1   89.93    8.42
  10  14   0  118.41    7.03
  10 -14   0   92.96    9.60
  10 -14   1  110.78   10.38
 -10 -14  -2  754.63   31.67
  10 -14   2  880.11   37.85
 -10  15   5    9.48    1.85
  10  15  -4  146.79    7.71
 -10  15   4  140.86    8.82
  10  15  -3  179.32    9.26
  10  15  -2  862.24   34.67
  10 -15  -2  763.10   35.55
  10  15  -2  836.62   34.51
  10  15  -1    8.71    1.65
  10  15  -1    7.10    1.46
  10 -15  -1    8.15    2.59
  10  15   0   81.87    5.14
  10 -15   0   75.90    6.90
  10 -15   1    0.29    2.42
  10  16  -3    2.49    0.91
  10  16  -2    2.38    0.94
  10  16  -2    2.75    1.02
  10  16  -1   31.95    2.71
  11   0 -10   16.77    2.53
  11   0 -10   15.63    2.53
  11   0  -9   -0.28    1.48
  11   0  -8  180.86   11.76
  11   0  -8  174.78   11.21
  11   0  -7    0.73    1.68
  11   0  -7    0.33    1.51
  11   0  -6  783.42   36.20
  11   0  -6  751.03   35.33
  11   0  -5    0.35    1.59
  11   0  -5    0.33    1.61
  11   0  -4 2886.73  117.28
  11   0  -4 2903.58  118.14
  11   0  -3   -0.33    2.03
  11   0  -2   67.90    6.58
 -11   0   1   -1.13    1.43
  11   0  -1    0.68    2.01
 -11   0   0    2.60    1.86
  11   0   0    3.76    2.26
 -11   0  -1    0.69    1.64
  11   0   1    1.35    1.70
  11   0   2 1167.58   51.60
  11   0   2 1202.56   51.47
  11   0   3    0.61    1.59
  11   0   3    0.30    1.92
  11   0   4    5.36    1.85
  11   0   4    9.97    2.45
  11   0   5    3.59    1.45
  11  -1 -10   14.19    2.46
  11   1 -10   22.20    2.78
  11   1 -10   16.21    2.54
  11  -1  -9  120.65    8.40
  11  -1  -9  128.47    8.79
  11   1  -9  129.09    8.85
  11  -1  -8  862.20   39.77
  11   1  -8  946.72   40.66
  11  -1  -8  895.32   40.42
  11   1  -7  121.98    9.28
  11  -1  -7  111.69    9.39
  11  -1  -6  510.13   26.02
  11   1  -6  509.48   26.29
  11  -1  -6  534.93   27.06
  11  -1  -5  398.78   21.20
  11   1  -5  429.25   21.78
  11   1  -5  447.99   22.18
  11  -1  -5  393.01   22.06
  11   1  -4   29.77    4.35
  11  -1  -4   26.11    4.01
  11   1  -4   28.47    4.17
  11  -1  -4   26.94    4.41
  11   1  -4   24.70    4.04
  11   1  -3  192.96   12.26
  11  -1  -3  206.37   13.29
  11   1  -3  220.23   12.96
  11   1  -2 1561.08   65.15
  11  -1  -2 1544.76   66.20
  11   1  -2 1541.63   65.35
 -11   1   1  277.13   15.34
 -11  -1   1  286.11   15.72
  11  -1  -1  293.63   16.82
  11   1  -1  294.57   16.19
 -11   1   0 1146.46   48.46
 -11  -1   0 1111.43   48.79
  11  -1   0 1146.03   49.46
  11   1   0 1088.78   48.43
  11   1   0 1067.72   48.14
 -11  -1  -1   11.96    2.91
  11  -1   1   17.78    3.53
  11   1   1   13.09    2.94
  11   1   1   14.69    2.95
  11   1   2   57.98    5.67
  11  -1   2   48.73    5.79
  11   1   2   58.28    5.83
 -11  -1  -2   50.16    5.86
  11  -1   2   67.09    6.46
  11   1   2   62.34    5.91
  11   1   3    3.20    1.62
  11  -1   3    1.58    1.72
  11   1   3    3.14    1.92
  11  -1   3    4.19    1.88
  11   1   3    3.50    1.77
  11   1   4   24.66    3.37
  11  -1   4   23.01    3.52
  11   1   4   31.27    3.78
  11  -1   4   29.40    3.96
  11   1   4   26.39    3.57
  11  -1   5   -0.62    1.60
  11   1   5   -0.57    1.57
  11   2 -10  462.81   20.26
  11   2 -10  438.46   19.85
  11  -2 -10  413.56   20.10
  11   2  -9    8.01    2.22
  11  -2  -9    9.58    2.37
  11  -2  -9    9.84    2.33
  11   2  -8    0.31    1.45
  11  -2  -8    3.19    1.90
  11  -2  -8    1.95    1.69
  11  -2  -8    1.47    1.44
  11   2  -7    0.66    1.46
  11   2  -7    0.33    1.77
  11  -2  -7    0.72    1.61
  11  -2  -6  417.26   21.89
  11   2  -6  421.83   22.23
  11   2  -6  484.27   22.76
  11  -2  -6  408.38   22.60
  11   2  -5    2.09    1.90
  11  -2  -5    0.94    1.34
  11   2  -5    0.94    1.49
  11  -2  -5    1.84    1.91
  11   2  -4 1313.00   57.50
  11  -2  -4 1252.96   57.88
  11   2  -4 1453.00   57.65
  11   2  -4 1319.08   56.87
  11   2  -3   36.11    4.84
  11   2  -3   39.92    4.72
  11  -2  -3   40.62    5.14
  11   2  -3   38.87    4.57
  11   2  -2  836.25   36.94
  11  -2  -2  798.96   38.41
  11   2  -2  839.67   37.15
 -11  -2   1   36.55    4.38
  11  -2  -1   32.65    5.03
  11   2  -1   25.24    3.91
  11   2   0  350.34   18.72
 -11  -2   0  388.72   19.87
  11  -2   0  345.96   19.91
  11   2   0  369.09   19.02
  11   2   1   39.77    4.76
 -11  -2  -1   41.44    5.31
  11  -2   1   57.59    6.25
  11   2   1   47.58    5.19
  11   2   2   23.84    3.73
  11  -2   2   34.27    4.80
  11   2   2   29.70    4.07
 -11  -2  -2   29.50    4.49
  11   2   3  102.14    7.50
  11  -2   3  107.50    8.43
  11   2   3   98.33    7.51
  11  -2   3   93.46    7.99
  11   2   3   99.62    7.48
  11   2   4  486.52   22.05
  11  -2   4  445.36   22.88
  11   2   4  445.10   22.03
  11  -2   4  491.12   23.06
  11   2   4  473.48   22.04
  11   2   5   42.51    4.00
  11   2   5   47.13    4.08
  11   3 -10  181.22    9.30
  11  -3 -10  161.11    9.11
  11   3 -10  154.47    8.66
  11   3  -9   45.00    4.59
  11  -3  -9   47.83    4.94
  11  -3  -9   43.70    4.68
  11   3  -8  226.43   12.71
  11  -3  -8  216.51   13.42
  11  -3  -8  191.49   12.25
  11  -3  -7  132.36    9.58
  11   3  -7  134.31    9.67
  11   3  -7  149.26    9.89
  11   3  -6 1521.65   68.19
  11   3  -6 1713.29   68.35
  11  -3  -5   90.57    7.61
  11   3  -5   93.25    8.11
  11   3  -5  116.94    8.26
  11  -3  -5   88.86    8.59
  11   3  -4  162.66   10.74
  11   3  -4  159.91   11.35
  11  -3  -4  168.65   11.86
  11   3  -4  176.85   11.01
  11   3  -4  162.62   10.53
  11   3  -3   83.26    7.64
  11  -3  -3   78.44    7.73
  11   3  -3   99.51    7.43
  11   3  -3   94.85    7.29
  11  -3  -2  432.93   24.58
  11   3  -2  491.73   23.37
  11   3  -2  507.09   23.42
 -11  -3   1    5.79    2.09
  11  -3  -1    7.47    2.93
  11   3  -1    3.37    2.01
  11   3   0 1804.75   73.19
 -11  -3   0 1763.06   73.86
  11  -3   0 1715.73   74.91
  11   3   0 1733.28   72.80
  11   3   1   36.42    4.39
 -11  -3  -1   36.40    4.91
  11  -3   1   35.15    5.13
  11   3   1   33.11    4.25
  11   3   2    1.64    1.42
 -11  -3  -2    1.84    1.80
  11  -3   2    1.51    2.11
  11   3   2    1.92    1.53
  11  -3   3    7.69    2.71
  11   3   3    6.74    2.08
  11   3   3   10.27    2.37
  11  -3   4   91.43    7.38
  11   3   4   90.95    6.45
  11   3   4   87.81    6.44
  11  -3   5   24.40    3.19
  11   3   5   25.27    2.81
  11   3   5   29.38    2.98
  11   4  -9   12.07    2.39
  11  -4  -9   13.23    2.79
  11  -4  -9   14.92    2.73
  11   4  -8   59.24    5.37
  11  -4  -8   46.89    5.72
  11  -4  -8   56.77    5.58
  11  -4  -7   31.84    4.31
  11   4  -7   32.49    4.34
  11   4  -7   41.78    4.58
  11  -4  -7   36.05    5.40
  11   4  -6  534.42   27.34
  11   4  -6  599.43   27.05
  11   4  -5    6.81    2.24
  11   4  -5    9.96    2.42
  11   4  -4 1831.25   72.55
  11   4  -4 1750.14   74.06
  11  -4  -4 1609.80   74.10
  11   4  -4 1773.98   72.72
  11  -4  -3   75.18    8.19
  11   4  -3   88.54    6.87
  11   4  -2  328.28   18.49
  11   4  -2  337.12   16.79
  11   4  -2  282.09   17.39
  11  -4  -2  322.96   20.11
  11   4  -1   52.28    6.43
  11  -4  -1   64.61    8.43
 -11  -4   1   75.53    6.43
  11  -4   0   76.10    9.16
  11   4   0   72.55    6.39
 -11  -4   0   85.43    7.21
  11   4   1  172.99   10.72
 -11  -4  -1  175.56   11.50
  11  -4   1  170.27   13.46
  11   4   1  159.62   10.39
  11   4   2  587.69   28.47
  11  -4   2  605.90   31.54
  11   4   2  602.28   28.29
  11  -4   3   54.30    6.60
  11   4   3   43.07    4.41
  11   4   3   45.01    4.60
  11   4   4   26.25    3.22
  11   4   5  142.98    7.86
  11   5  -9    1.89    1.29
  11  -5  -9    3.79    1.82
  11  -5  -9    2.37    1.52
  11   5  -8 1870.43   74.11
  11  -5  -8 1980.40   76.98
  11  -5  -8 1795.60   76.19
  11  -5  -7    5.72    2.10
  11   5  -7    5.31    1.79
  11  -5  -7    4.58    2.63
  11  -5  -6   78.07    6.86
  11   5  -6   74.59    6.95
  11   5  -6   82.78    6.57
  11   5  -5    2.45    1.95
 -11   5   5    0.33    1.31
  11   5  -4  273.23   16.23
  11  -5  -4  266.89   17.15
  11   5  -4  283.64   15.15
  11  -5  -3    5.03    3.00
  11   5  -3    6.33    2.49
  11   5  -3    6.82    2.01
  11   5  -2 1878.24   80.50
  11   5  -2 1963.32   78.43
  11   5  -2 1794.31   79.78
  11  -5  -2 2064.55   85.31
 -11  -5   1    6.62    2.04
  11  -5  -1    5.48    4.08
  11   5  -1    6.64    2.38
  11   5  -1    3.83    1.96
  11   5   0  417.17   20.91
  11   5   0  376.78   21.95
  11  -5   0  433.20   26.54
 -11  -5  -1    3.10    1.65
  11  -5   1    1.20    2.76
  11   5   1    2.65    1.38
  11   5   2  167.77   10.41
 -11  -5  -2  177.04   11.27
  11  -5   2  177.68   13.93
  11   5   3    2.89    1.48
  11  -5   3    2.41    2.75
  11   5   4   23.71    2.88
  11  -5   4   27.81    4.80
  11   5   5    8.74    1.53
  11  -6  -9  145.63    9.42
  11  -6  -8   38.00    5.05
  11  -6  -8   34.74    4.62
  11  -6  -8   28.01    3.97
  11  -6  -7   38.68    4.57
  11  -6  -7   37.38    5.44
  11  -6  -6  512.70   24.73
  11   6  -6  494.66   24.47
  11   6  -5    3.32    2.09
 -11   6   5    2.96    1.71
  11   6  -4 1690.72   71.15
  11  -6  -4 1603.11   72.90
  11   6  -4 1707.89   69.46
  11   6  -3  166.49   11.44
  11  -6  -3  167.40   13.92
  11   6  -3  178.80   10.60
  11   6  -2  343.52   18.79
  11   6  -2  333.10   17.01
  11   6  -2  335.72   18.48
  11  -6  -2  317.44   22.69
  11   6  -1  166.94   11.34
 -11  -6   1  150.25    9.83
  11   6  -1  146.30   10.49
  11  -6  -1  160.39   15.79
  11   6   0   24.73    3.52
  11  -6   0   36.55    7.47
  11   6   0   23.57    4.09
 -11  -6   0   31.56    3.93
  11  -6   1  177.59   15.46
  11   6   1  155.20   10.00
 -11  -6  -1  168.70   10.51
  11   6   2  742.37   34.08
 -11  -6  -2  876.27   35.35
 -11   6  -2  692.00   34.46
  11  -6   2  889.00   41.42
 -11   6  -3  378.43   20.79
  11   6   3  403.21   19.12
 -11   6  -4   61.15    6.02
  11   6   4   63.48    4.78
  11  -7  -9   71.65    5.84
  11  -7  -8  193.75   11.78
  11  -7  -8  171.69   11.03
  11  -7  -7    5.17    2.19
  11  -7  -7    4.92    2.59
  11  -7  -6 1705.40   72.89
  11   7  -5   76.65    6.80
 -11   7   5   77.99    7.01
 -11   7   4  556.67   27.27
  11   7  -4  572.42   26.15
  11  -7  -3    6.78    3.76
  11   7  -3    8.94    2.45
  11   7  -3    9.21    2.16
 -11   7   2  247.43   14.32
  11   7  -2  274.17   15.39
  11   7  -2  256.68   14.87
  11  -7  -2  271.66   20.79
  11   7  -2  241.20   13.52
 -11   7   1  180.72   11.58
  11   7  -1  175.23   11.77
  11   7  -1  171.86   11.39
  11  -7  -1  190.19   17.95
  11   7  -1  175.09   10.44
 -11   7   0 1333.59   56.54
  11   7   0 1272.63   56.27
  11   7   0 1273.41   55.88
  11  -7   0 1437.60   66.40
  11   7   1   43.94    4.42
  11  -7   1   42.70    8.20
 -11   7  -1   43.77    5.04
  11   7   1   47.03    5.25
 -11  -7  -1   37.84    4.29
  11   7   2   33.60    3.73
  11  -7   2   38.74    7.57
 -11   7  -2   27.03    3.73
 -11  -7  -2   31.04    3.77
 -11   7  -3    2.14    1.71
  11   7   3    3.86    1.34
  11  -7   3    6.62    4.10
 -11   7  -4   41.23    4.73
  11   7   4   44.71    3.61
  11  -8  -9   30.37    3.37
  11  -8  -8   78.52    6.51
  11  -8  -8   75.96    6.74
  11  -8  -7   15.65    3.42
  11  -8  -7    9.82    2.80
  11  -8  -7   15.70    2.90
  11  -8  -6  428.38   22.53
  11   8  -5   53.88    5.38
 -11   8   5   60.55    5.91
 -11   8   4 1281.90   55.29
 -11   8   3    5.91    2.12
  11   8  -3    5.96    1.70
  11   8  -3    6.81    2.24
  11  -8  -3    4.41    3.97
 -11   8   2  948.04   43.19
  11   8  -2 1031.36   43.89
 -11   8   2 1009.03   44.14
  11   8  -2  978.22   43.46
  11  -8  -2 1048.47   51.80
  11   8  -2  960.35   42.08
  11   8  -1   34.15    4.38
 -11   8   1   38.62    4.83
  11   8  -1   38.18    4.79
  11   8  -1   36.32    4.05
 -11   8   0  406.79   21.09
  11   8   0  415.81   20.94
  11   8   0  399.34   20.40
  11  -8   0  391.33   28.48
 -11  -8  -1  176.14   10.29
 -11   8  -1  171.20   11.18
  11   8   1  181.77   11.29
  11  -8   1  168.28   17.10
 -11  -8  -2  129.11    7.80
 -11   8  -2  102.22    7.75
 -11   8  -2  108.20    8.20
  11  -8   2  117.78   13.83
  11   8   2  117.57    7.44
 -11   8  -3   13.11    2.71
  11   8   3   10.34    1.88
  11   8   4  166.04    8.69
 -11   8  -4  172.38   10.72
 -11   9   8  541.76   25.06
  11  -9  -8  544.29   24.65
  11  -9  -7  237.75   13.73
  11  -9  -7  243.71   14.13
 -11   9   6  261.95   14.81
  11  -9  -6  275.36   15.75
  11   9  -5  123.52    8.34
 -11   9   5  122.85    8.89
 -11   9   4   11.85    2.69
  11   9  -3   73.45    6.35
  11  -9  -3   73.09    9.29
 -11   9   3   72.04    6.74
  11   9  -2 1117.75   48.87
 -11   9   2 1075.05   48.83
 -11   9   2 1210.48   50.02
  11   9  -2 1151.46   48.95
  11  -9  -2 1114.02   56.03
  11   9  -1   29.89    4.05
 -11   9   1   34.57    4.49
  11   9  -1   36.14    4.42
  11  -9  -1   26.71    7.43
 -11   9   0  566.25   26.93
  11   9   0  584.66   26.58
  11   9   0  540.22   25.85
 -11  -9  -1   94.81    6.52
 -11   9  -1   83.60    7.12
 -11   9  -1   92.33    7.33
  11   9   1   96.90    7.27
  11  -9   1   85.09   12.36
 -11  -9  -2   39.13    3.71
 -11   9  -2   28.11    3.85
  11  -9   2   45.56    9.48
 -11   9  -3   15.38    2.74
  11  -9   3   13.48    6.36
  11  -9   4   48.79    7.69
  11 -10  -8   16.27    2.81
 -11  10   8   16.56    2.62
  11 -10  -7   15.25    2.87
  11 -10  -6  316.91   17.26
 -11  10   6  323.04   16.92
  11 -10  -5    2.90    2.23
 -11  10   5    2.27    1.62
  11  10  -4 1365.91   59.05
 -11  10   4 1513.45   60.77
  11 -10  -3    1.04    2.97
  11  10  -3    3.31    1.61
 -11  10   3    4.70    1.90
  11  10  -2  124.16    8.28
 -11  10   2   92.20    7.73
 -11  10   2  103.84    8.22
  11  10  -2  109.50    7.89
  11 -10  -2  121.99   11.86
  11  10  -1    1.94    1.61
 -11  10   1    2.84    1.68
  11  10  -1   -0.26    1.45
  11 -10  -1    3.61    4.02
  11  10   0   20.21    3.19
 -11  10   0   14.64    3.02
  11  10   0   19.16    3.05
  11 -10   0   15.74    5.73
 -11  10  -1   44.72    4.85
 -11  10  -1   50.50    5.08
  11  10   1   61.79    5.25
  11 -10   1   53.20    9.79
 -11 -10  -2 1016.50   41.15
 -11  10  -2  899.04   42.11
 -11  10  -3   94.97    6.90
  11 -10   3  113.30   12.85
  11 -11  -7   73.59    5.86
 -11  11   7   64.78    5.36
  11 -11  -6  348.55   17.78
 -11  11   6  343.06   17.45
 -11  11   5  169.24   10.53
  11  11  -4    1.09    1.24
  11  11  -4    2.30    1.36
 -11  11   4    1.42    1.26
  11  11  -3  272.52   13.91
 -11  11   3  243.16   14.46
  11  11  -2 1025.36   40.94
 -11  11   2  912.21   41.13
  11 -11  -2  862.86   44.27
  11  11  -2  926.59   40.53
  11  11  -1  422.10   19.85
 -11  11   1  387.06   20.35
  11 -11  -1  357.60   23.44
  11  11  -1  416.24   19.61
 -11  11   0  572.67   28.69
  11  11   0  651.53   28.33
  11  11   0  649.59   27.92
  11 -11   0  594.71   33.77
 -11 -11  -1    0.67    0.89
  11  11   1    1.47    1.20
 -11  11  -1    1.00    1.33
  11 -11   1   -0.69    4.63
 -11 -11  -2   47.71    3.67
 -11  11  -2   37.88    4.10
  11 -11   2   54.10    8.69
 -11  11  -3    1.03    1.23
 -11  12   7    5.06    1.45
  11 -12  -7    3.54    1.65
 -11  12   6  201.74   11.57
 -11  12   6  245.04   12.37
 -11  12   5    7.86    2.05
  11  12  -4  649.07   28.07
 -11  12   4  631.96   29.34
  11  12  -3   62.12    5.13
 -11  12   3   66.27    5.93
  11  12  -2  809.72   34.76
  11  12  -2  794.71   34.66
  11  12  -1    9.59    2.05
  11  12  -1   13.00    2.39
  11  12   0  549.53   24.75
  11  12   1    2.96    1.25
 -11 -12  -1    4.47    1.26
 -11  12  -2   35.64    3.69
 -11 -12  -2   33.06    2.81
 -11  13   6  826.33   35.18
 -11  13   5  106.32    7.20
  11  13  -4  125.07    7.23
 -11  13   4  123.18    8.28
  11  13  -3  303.06   14.08
 -11  13   3  260.98   14.79
  11  13  -2  285.87   13.75
  11  13  -2  269.30   13.63
  11  13  -1    8.56    1.75
  11  13  -1    6.37    1.62
  11  13   0  898.19   37.61
 -11 -13  -1  125.36    6.76
 -11  14   5    7.06    1.62
  11  14  -4  762.40   30.92
 -11  14   4  709.73   32.16
  11  14  -3   12.25    1.85
  11  14  -2  115.10    6.60
  11  14  -2  107.90    6.47
  11  14  -1  173.77    8.85
  11  14  -1  161.33    8.54
  11  14   0    3.35    1.10
 -11 -14   0    3.67    1.04
  11  15  -3   48.15    3.40
  11  15  -2  789.56   31.69
  11  15  -2  751.46   31.65
  12   0  -9    1.88    1.40
  12   0  -9    0.87    1.24
  12   0  -8  608.79   29.04
  12   0  -8  663.95   29.45
  12   0  -7    1.86    1.89
  12   0  -6   11.98    2.89
  12   0  -6    9.98    2.74
  12   0  -5    2.00    1.77
  12   0  -5    1.58    1.68
  12   0  -4  318.83   17.43
  12   0  -4  298.11   16.95
  12   0  -3    1.00    2.11
  12   0  -2  112.80    8.91
 -12   0   1    1.82    1.61
  12   0  -1    1.04    1.75
 -12   0   0  309.11   17.45
  12   0   0  326.76   17.65
  12   0   1    0.94    1.49
  12   0   2    3.69    1.91
  12   0   3    0.99    1.31
  12   0   4  838.38   35.90
  12  -1  -9  135.13    8.46
  12  -1  -9  125.21    8.36
  12   1  -9  144.76    8.56
  12  -1  -8  789.90   36.72
  12   1  -8  884.76   37.05
  12  -1  -8  824.46   36.92
  12   1  -7  289.22   16.69
  12   1  -7  328.68   16.93
  12  -1  -7  308.92   17.02
  12  -1  -6  317.64   17.52
  12   1  -6  283.92   17.27
  12   1  -6  350.46   17.75
  12  -1  -6  335.38   17.98
  12  -1  -5  275.25   15.48
  12   1  -5  272.09   15.74
  12   1  -5  277.29   15.27
  12  -1  -5  249.94   15.28
  12   1  -4  283.97   16.51
  12  -1  -4  296.17   17.13
  12   1  -4  320.64   16.94
  12   1  -4  286.15   16.09
  12  -1  -3   86.09    8.03
  12   1  -3   92.23    7.78
  12   1  -3   99.73    7.91
  12  -1  -2   76.60    7.58
  12   1  -2   71.09    6.82
  12   1  -2   86.05    7.16
  12   1  -1  210.01   12.42
 -12  -1   1  191.63   12.23
  12  -1  -1  196.20   13.19
  12   1  -1  202.00   12.71
 -12  -1   0   53.99    5.89
  12  -1   0   61.46    6.39
  12   1   0   55.18    5.80
  12   1   1   33.58    4.34
 -12  -1  -1   43.32    5.28
  12  -1   1   39.72    4.96
  12   1   1   44.64    5.01
  12  -1   2   60.87    5.99
  12   1   2   65.05    5.89
  12   1   2   72.54    5.94
  12  -1   3    5.68    2.14
  12   1   3    6.56    2.00
  12  -1   4   38.38    3.99
  12   1   4   41.54    3.96
  12   2  -9    2.59    1.46
  12  -2  -9    1.10    1.33
  12   2  -8  114.77    7.79
  12  -2  -8  105.35    7.85
  12  -2  -8  109.12    7.71
  12  -2  -8   95.99    7.59
  12   2  -7    0.93    1.56
  12   2  -7    2.52    1.67
  12  -2  -7    4.12    2.10
  12   2  -6  140.29   10.20
  12   2  -6  160.09   10.10
  12  -2  -6  135.56   10.13
  12   2  -5    6.68    2.69
  12  -2  -5    4.68    1.90
  12   2  -5    5.71    2.13
  12  -2  -5    5.48    2.42
  12   2  -4  153.27   10.04
  12   2  -4  152.45   10.62
  12  -2  -4  138.34   10.68
  12   2  -4  145.69   10.03
  12   2  -4  145.13    9.75
  12  -2  -3   15.21    3.80
  12   2  -3   13.18    2.88
  12   2  -3   14.58    3.13
  12  -2  -2   87.06    8.38
  12   2  -2   93.99    7.52
  12   2  -2   91.82    7.42
  12   2  -1   63.50    6.01
 -12  -2   1   60.06    6.07
  12  -2  -1   71.48    7.32
  12   2  -1   68.15    6.34
 -12  -2   0  197.04   12.88
  12  -2   0  217.06   13.70
  12   2   0  209.10   12.53
  12   2   1  134.98    9.10
 -12  -2  -1  134.20    9.82
  12  -2   1  129.73    9.74
  12   2   1  124.71    8.90
  12   2   2  639.68   29.61
 -12  -2  -2  669.39   30.99
  12  -2   2  672.60   30.87
  12   2   2  659.94   29.89
  12  -2   3  107.73    7.93
  12   2   3  115.64    7.54
  12   2   3  107.80    7.31
  12  -2   4  121.38    7.87
  12   2   4  126.33    7.47
  12   2   4  117.03    7.16
  12   3  -9  144.91    8.25
  12  -3  -9  131.11    8.18
  12  -3  -9  135.60    8.52
  12   3  -8  141.31    8.92
  12  -3  -8  135.01    9.28
  12  -3  -8  147.91    9.47
  12  -3  -7  110.33    8.17
  12   3  -7   99.78    7.95
  12   3  -7  111.13    7.81
  12   3  -6 1232.51   56.73
  12   3  -6 1412.58   56.33
  12   3  -5  284.78   16.66
  12   3  -5  311.23   15.86
  12  -3  -5  276.11   16.48
  12   3  -4  103.30    8.53
  12   3  -4  104.69    7.79
  12   3  -4   96.46    7.39
  12   3  -3  121.80    9.73
  12  -3  -3  135.51   10.64
  12   3  -3  140.02    9.44
  12   3  -3  143.64    9.43
  12  -3  -2  119.82    9.94
  12   3  -2  108.19    8.29
  12   3  -2  125.90    8.66
  12   3  -1   44.10    4.76
 -12  -3   1   36.11    4.59
  12  -3  -1   36.79    5.39
  12   3  -1   41.68    4.81
 -12  -3   0    4.97    2.17
  12  -3   0    5.47    2.68
  12   3   0    6.46    2.04
  12   3   1   49.21    5.02
 -12  -3  -1   46.88    5.42
  12  -3   1   51.47    6.07
  12   3   1   52.61    5.21
  12   3   2  416.50   20.55
 -12  -3  -2  436.43   21.76
  12  -3   2  436.66   22.10
  12   3   2  441.23   20.77
  12  -3   3    5.02    2.15
  12   3   3    1.40    1.39
  12   3   3    5.20    1.62
  12  -3   4    9.60    2.17
  12   3   4   10.53    1.86
  12   3   4    8.26    1.75
  12   4  -9   24.19    2.73
  12  -4  -9   23.28    3.03
  12  -4  -9   18.46    2.87
  12   4  -8  305.27   14.82
  12  -4  -8  292.34   15.79
  12  -4  -8  277.04   15.30
  12  -4  -7    1.08    1.92
  12  -4  -7    1.13    1.47
  12   4  -7    3.05    1.75
  12   4  -7    2.60    1.46
  12  -4  -6   55.49    5.77
  12   4  -6   52.97    5.77
  12   4  -6   70.54    5.78
  12   4  -5   41.07    5.26
  12   4  -5   53.51    5.05
  12   4  -4  246.44   14.95
  12   4  -4  256.93   13.73
  12   4  -4  244.53   13.72
  12  -4  -3   15.03    3.70
  12   4  -3   17.96    3.56
  12   4  -3   15.62    2.88
  12   4  -3   15.51    2.90
  12  -4  -2    9.25    3.38
  12   4  -2   14.59    2.83
  12   4  -2   11.97    2.60
  12   4  -1  207.83   11.63
 -12  -4   1  196.40   11.91
  12   4  -1  172.00   11.17
 -12  -4   0   69.55    6.31
  12   4   0   59.28    5.58
 -12  -4  -1  159.41   10.03
  12   4   1  143.77    9.05
  12   4   2   20.12    2.98
 -12  -4  -2   23.90    3.50
 -12   4  -3  111.90    9.47
  12   4   3  122.44    7.54
  12   4   4  589.49   25.39
  12  -5  -9    1.20    1.31
  12   5  -9    4.08    1.27
  12  -5  -8 1148.13   51.94
  12  -5  -8 1230.47   52.81
  12   5  -8 1263.17   51.13
  12  -5  -8 1327.89   53.35
  12  -5  -7    4.92    1.86
  12   5  -7    5.04    1.82
  12  -5  -7    7.28    2.61
  12   5  -7   11.58    2.22
  12  -5  -6   50.17    5.33
  12   5  -6   57.77    5.75
  12   5  -5    1.00    1.73
 -12   5   5    3.38    1.93
  12   5  -4  553.04   26.91
  12   5  -4  534.95   25.21
  12   5  -3   34.92    4.67
  12   5  -3   31.06    3.85
  12  -5  -3   28.53    5.26
  12   5  -2  320.08   16.49
  12  -5  -2  316.36   20.27
  12   5  -1  101.88    7.50
  12  -5  -1   98.86   10.72
 -12  -5   1  115.30    8.10
  12  -5   0  252.73   17.85
 -12  -5   0  258.54   14.37
  12   5   1    7.60    2.07
  12  -5   1    4.55    3.30
 -12  -5  -1    3.80    1.69
  12   5   2   18.27    2.78
  12  -5   2   15.54    3.99
 -12   5  -2   19.78    3.37
 -12  -5  -2   24.51    3.30
 -12   5  -3    1.07    1.75
  12   5   3    1.04    0.99
  12  -5   3    0.37    2.16
  12   5   4   17.27    2.09
  12  -6  -9    1.72    1.23
  12  -6  -8  523.70   23.71
  12  -6  -8  467.10   22.96
  12  -6  -8  454.98   22.30
  12  -6  -7    6.83    2.11
  12  -6  -7    6.74    2.58
  12   6  -6    7.93    2.23
  12   6  -5    4.95    2.06
 -12   6   5    3.56    1.89
  12   6  -4  405.66   20.53
 -12   6   4  375.92   19.99
  12   6  -4  381.08   18.88
  12   6  -3  276.39   15.78
  12  -6  -3  281.47   18.25
  12   6  -3  284.73   14.87
  12   6  -2    5.90    2.35
 -12   6   2    4.63    1.81
  12  -6  -2    9.49    4.18
  12   6  -2    8.32    2.39
  12   6  -2    8.68    2.25
 -12  -6   1  151.15    9.40
  12   6  -1  126.75    9.85
  12  -6  -1  140.01   13.47
  12   6  -1  140.97    8.99
 -12  -6   0    4.84    1.67
  12  -6   0    8.26    4.35
 -12  -6  -1  178.10   10.66
 -12   6  -1  187.36   11.71
  12  -6   1  180.13   14.60
  12   6   2  106.37    7.21
 -12  -6  -2  129.57    7.88
 -12   6  -2  106.98    8.00
  12  -6   2  112.47   10.60
 -12   6  -3  153.55   10.79
  12   6   3  164.03    8.96
  12  -7  -8   35.95    4.19
  12  -7  -8   38.02    4.50
  12  -7  -7   46.17    5.39
  12  -7  -7   38.09    4.85
  12  -7  -7   41.74    4.50
  12   7  -6 1428.22   60.48
  12  -7  -6 1507.88   63.12
  12   7  -5   33.97    4.25
 -12   7   5   28.31    4.09
  12   7  -4   97.29    7.61
 -12   7   4   80.93    7.16
  12   7  -4   83.98    6.34
 -12   7   3   14.62    3.06
  12   7  -3   16.90    3.19
  12  -7  -3   16.53    4.61
  12   7  -3   13.51    2.55
 -12   7   2  135.37    9.38
  12   7  -2  155.16   10.22
  12   7  -2  134.76    8.70
  12   7  -2  133.99    9.49
  12  -7  -2  150.07   13.61
 -12  -7   1  192.40   11.05
 -12   7   1  185.03   11.89
  12   7  -1  194.00   12.18
  12  -7  -1  203.95   16.93
  12   7  -1  186.56   10.82
 -12   7   0    1.93    1.71
 -12  -7   0    3.67    1.50
  12  -7   0    1.39    3.50
  12   7   0    2.13    1.37
 -12   7  -1   35.58    4.52
 -12  -7  -1   42.09    4.17
 -12  -7  -2  156.74    8.75
 -12   7  -2  132.07    9.06
 -12   7  -2  134.24    9.73
 -12   7  -3    1.75    1.59
  12  -7   3    0.92    2.90
  12  -8  -8   62.02    5.39
  12  -8  -8   77.08    6.17
  12  -8  -7    2.27    1.76
  12  -8  -7    3.05    1.99
 -12   8   6   51.79    5.27
  12  -8  -6   50.80    5.78
  12   8  -5   32.67    3.89
 -12   8   5   28.89    4.02
  12   8  -4  155.54    9.91
 -12   8   4  142.68    9.85
 -12   8   3    6.83    2.28
  12   8  -3    2.49    1.51
  12   8  -3    3.75    1.72
  12  -8  -3    4.33    3.22
 -12   8   2  102.80    7.74
  12   8  -2   95.06    7.63
  12   8  -2  102.69    6.94
 -12   8   2  100.80    8.08
  12   8  -2   96.87    7.53
  12  -8  -2  100.22   11.21
 -12  -8   1  158.52    9.68
 -12   8   1  161.10   10.82
  12   8  -1  169.14   10.89
  12  -8  -1  189.17   16.15
  12   8  -1  182.25    9.95
 -12  -8   0  112.04    7.25
 -12   8   0  106.81    8.27
  12  -8   0  103.42   12.03
  12   8   0  108.27    7.06
 -12  -8  -1  151.82    8.47
 -12   8  -1  129.12    9.09
 -12   8  -1  128.54    9.16
  12  -8   1  140.87   13.96
  12   8   1  137.13    8.02
 -12  -8  -2  434.27   19.18
 -12   8  -2  373.98   20.31
 -12   8  -3   20.27    3.14
  12  -8   3   20.09    4.90
  12   8   3   19.38    2.10
  12  -9  -8  883.96   35.98
 -12   9   8  778.36   35.51
  12  -9  -7   30.17    3.76
  12  -9  -7   31.27    4.04
  12  -9  -6   88.11    7.33
 -12   9   6   85.30    6.74
  12   9  -5  428.32   19.53
  12  -9  -5  385.02   20.70
 -12   9   5  396.78   20.06
  12   9  -4   62.42    5.45
 -12   9   4   55.94    5.54
  12   9  -3  109.53    7.56
  12  -9  -3   89.02    9.82
 -12   9   3  107.40    8.11
 -12   9   2   54.00    5.28
  12   9  -2   50.47    5.04
 -12   9   2   54.80    5.55
  12   9  -2   54.64    5.18
  12  -9  -2   57.96    8.25
 -12  -9   1    7.09    1.70
  12   9  -1    2.63    1.70
 -12   9   1    6.21    2.18
  12   9  -1    4.12    1.79
  12  -9  -1    5.26    4.07
 -12  -9   0  140.59    8.32
  12  -9   0  115.97   13.06
 -12   9   0  133.55    9.44
  12   9   0  157.72    9.40
 -12  -9  -1  143.81    8.14
 -12   9  -1  133.80    9.00
 -12   9  -1  142.55    9.21
  12  -9   1  141.63   14.15
 -12  -9  -2   33.24    3.08
 -12   9  -2   36.00    4.03
  12 -10  -7    0.45    1.42
  12 -10  -6   10.28    2.59
 -12  10   6    8.95    2.16
  12  10  -5  106.66    6.78
 -12  10   5  103.12    7.40
  12 -10  -5   98.04    7.76
  12  10  -4  352.02   16.64
  12  10  -4  342.03   16.83
 -12  10   4  331.21   17.45
  12  10  -3   47.30    4.50
 -12  10   3   46.69    5.00
 -12  10   2   23.03    3.36
  12  10  -2   24.84    3.33
  12 -10  -2   24.51    5.33
  12  10  -2   23.62    3.24
  12  10  -1    9.51    2.12
  12 -10  -1   10.54    4.24
  12  10  -1    8.89    2.16
 -12  10   1    7.25    2.15
 -12 -10   0  155.78    8.45
 -12  10   0  151.32    9.67
  12  10   0  138.81    8.84
  12 -10   0  130.29   12.72
  12 -10   1    3.22    3.76
 -12  10  -1    3.25    1.49
 -12  10  -1    3.70    1.52
 -12 -10  -1    4.91    1.35
  12 -10   2   26.57    6.26
 -12 -10  -2   22.74    2.29
 -12  10  -2   22.01    2.94
 -12  11   6  313.10   15.58
  12 -11  -6  313.70   15.71
 -12  11   5   63.48    5.34
  12  11  -4   29.25    3.09
  12  11  -4   25.88    3.04
 -12  11   4   26.94    3.50
  12  11  -3  213.63   11.14
 -12  11   3  196.97   11.83
  12 -11  -2    1.99    2.50
  12  11  -2    0.78    1.02
  12  11  -2    1.20    1.12
  12 -11  -1  274.23   18.05
 -12  11   1  312.61   15.97
  12  11  -1  309.36   15.14
 -12 -11   0    7.58    1.57
  12  11   0    7.80    1.80
 -12  11   0    9.62    2.31
  12 -11   0   11.79    3.94
  12 -11   1    2.94    3.20
 -12 -11  -1    4.43    1.15
 -12  12   6   21.59    2.72
 -12  12   5   34.17    3.59
  12  12  -4   24.03    2.70
 -12  12   4   23.25    3.18
  12  12  -3  215.51   10.72
  12  12  -3  197.07   10.62
 -12  12   3  206.47   11.59
  12  12  -2  203.72   10.50
  12  12  -2  198.20   10.45
  12 -12  -1   -0.32    1.90
  12  12  -1    0.34    0.92
  12 -12   0   95.98    8.46
 -12 -12   0  108.38    6.11
 -12 -12  -1    7.48    1.28
 -12  13   4    9.53    1.96
  12  13  -4    9.16    1.49
  12  13  -3  144.68    7.26
  12  13  -3  115.97    6.89
  12  13  -2   35.68    3.15
  12  13  -2   39.16    3.25
  12  13  -1   11.27    1.75
  13   0  -9   -0.49    1.02
  13   0  -9    1.88    1.24
  13   0  -8    5.12    1.86
  13   0  -8    3.75    1.50
  13   0  -7    1.99    1.54
  13   0  -6   33.20    4.36
  13   0  -6   33.49    4.14
  13   0  -5    0.94    1.54
  13   0  -5   -0.28    1.40
  13   0  -4  272.26   15.01
  13   0  -3    0.32    1.30
  13   0  -2 2219.07   91.58
  13   0  -1   -0.32    1.92
  13   0   0  125.85    9.02
  13   0   1    1.32    1.67
  13   0   2    2.04    1.75
  13   0   3    0.54    1.20
  13  -1  -9  112.51    6.83
  13  -1  -9   97.62    6.41
  13   1  -9  112.14    6.54
  13  -1  -8    2.12    1.61
  13   1  -8    1.79    1.48
  13   1  -8    3.81    1.45
  13  -1  -8    2.36    1.49
  13   1  -7  219.04   12.10
  13  -1  -7  207.59   12.19
  13   1  -6  309.61   16.95
  13   1  -6  316.80   16.28
  13  -1  -6  308.25   16.57
  13  -1  -5  138.77    9.75
  13   1  -5  138.50    9.92
  13   1  -5  144.06    9.45
  13  -1  -5  155.85   10.00
  13   1  -4   70.65    6.64
  13   1  -4   76.09    6.35
  13  -1  -4   71.91    6.48
  13  -1  -3  337.65   18.81
  13   1  -3  353.75   18.34
  13  -1  -2   13.72    3.16
  13   1  -2   16.82    3.21
  13  -1  -1  319.16   17.56
  13   1  -1  309.82   16.93
  13  -1   0 1168.54   50.90
  13   1   0 1184.16   50.45
  13  -1   1    4.70    2.06
  13   1   1    6.04    2.06
  13  -1   2  805.88   35.00
  13   1   2  787.29   34.52
  13  -1   3   14.65    2.35
  13   1   3   12.67    2.18
  13  -2  -9   -0.18    1.25
  13   2  -9   -1.12    1.18
  13  -2  -8   68.12    5.63
  13   2  -8   58.21    5.09
  13   2  -8   64.61    5.03
  13  -2  -7    5.37    2.03
  13   2  -7    4.36    1.87
  13   2  -7    4.43    1.55
  13  -2  -7    6.51    2.04
  13   2  -6    3.10    1.95
  13   2  -6    1.21    1.35
  13  -2  -6    1.45    1.66
  13   2  -5    2.93    1.90
  13  -2  -5    4.57    2.18
  13   2  -5    2.75    1.55
  13   2  -4  521.00   26.01
  13   2  -4  540.44   24.97
  13  -2  -4  529.16   25.99
  13   2  -4  540.88   25.22
  13  -2  -3   43.18    5.39
  13   2  -3   43.90    4.83
  13   2  -3   45.19    4.91
  13  -2  -2  420.11   21.77
  13   2  -2  386.13   20.12
  13   2  -2  406.28   20.13
  13   2  -1   41.94    4.67
  13  -2  -1   45.91    5.57
  13   2  -1   47.37    5.06
 -13  -2   1   45.37    5.00
  13   2   0  503.86   23.35
 -13  -2   0  493.41   24.13
  13  -2   0  506.51   24.70
  13   2   0  486.42   23.67
  13  -2   1  142.26    9.61
  13   2   1  136.48    8.84
  13  -2   2  604.68   27.29
  13   2   2  585.57   26.44
  13  -2   3   17.22    2.65
  13   2   3   10.70    1.99
  13   3  -8  154.95    8.74
  13  -3  -8  149.04    8.89
  13  -3  -8  162.26    9.59
  13  -3  -7   60.04    5.67
  13   3  -7   61.85    5.64
  13   3  -7   73.85    5.53
  13  -3  -6   14.20    2.83
  13   3  -6    8.71    2.54
  13   3  -6   13.16    2.49
  13   3  -5  120.57    9.10
  13   3  -5  128.59    8.33
  13  -3  -5  129.23    9.36
  13   3  -4 1023.55   46.04
  13   3  -4 1030.55   44.62
  13  -3  -4 1062.03   46.34
  13   3  -4 1077.07   45.05
  13  -3  -3   71.31    7.35
  13   3  -3   79.53    6.36
  13   3  -3   70.07    6.11
  13  -3  -2  136.78   10.62
  13   3  -2  143.30    9.42
  13   3  -2  146.59    9.39
  13   3  -1   35.68    4.09
  13  -3  -1   22.95    4.22
  13   3  -1   27.60    3.74
 -13  -3   1   31.14    3.93
  13   3   0  263.59   13.63
 -13  -3   0  257.81   14.19
  13  -3   0  221.08   14.38
  13   3   0  263.59   13.84
 -13  -3  -1    9.84    2.29
  13  -3   1   10.13    2.63
  13   3   1    8.79    2.06
  13  -3   2 1069.42   44.83
  13   3   2 1021.72   43.45
  13  -3   3   35.57    3.78
  13   3   3   36.09    3.28
  13   4  -8    3.43    1.25
  13  -4  -8    2.42    1.32
  13  -4  -8    3.72    1.61
  13  -4  -7    1.23    1.25
  13   4  -7    2.33    1.52
  13   4  -7    2.25    1.26
  13   4  -6    7.64    2.35
  13   4  -6    7.11    1.98
  13   4  -5   13.04    2.97
 -13   4   5   12.72    2.99
  13   4  -5   12.29    2.30
  13   4  -4  312.66   17.01
  13   4  -4  307.38   15.80
  13   4  -4  307.93   15.60
  13   4  -3   40.60    4.27
  13   4  -3   35.67    3.98
  13   4  -3   33.99    4.51
  13   4  -2 1480.33   61.62
  13   4  -2 1487.28   61.66
 -13  -4   1   64.29    5.62
  13   4  -1   56.54    5.14
  13   4  -1   47.75    4.90
 -13  -4   0   30.60    3.88
  13   4   0   33.22    3.83
  13   4   0   34.88    3.93
 -13  -4  -1  112.71    7.63
 -13   4  -2   86.51    7.03
 -13   4  -3  212.44   12.49
  13  -5  -8  159.78    9.45
  13  -5  -8  163.75    9.55
  13  -5  -7    1.87    1.39
  13   5  -7    1.45    1.31
  13  -5  -7    3.54    2.19
  13   5  -6  984.27   42.57
  13   5  -5    1.75    1.59
 -13   5   5    3.23    1.85
  13   5  -4   20.13    3.02
  13   5  -4   20.54    3.50
  13   5  -3   11.48    2.43
  13  -5  -3   14.23    3.45
  13   5  -3   12.82    2.81
  13  -5  -2   54.78    6.64
  13   5  -2   54.94    5.07
 -13  -5   1    7.51    2.08
  13  -5  -1    8.47    3.35
  13   5  -1    6.77    2.08
 -13  -5   0 1841.02   72.37
  13   5   0 1810.66   71.89
  13   5   1   40.30    3.88
 -13  -5  -1   41.76    4.07
 -13   5  -1   43.54    4.95
 -13   5  -2  490.82   23.98
 -13   5  -2  447.38   22.20
  13   5   3    7.97    1.46
  13  -6  -8    3.46    1.61
  13  -6  -8    3.24    1.63
  13  -6  -7   78.00    6.75
  13  -6  -7   70.09    6.20
  13   6  -7   68.84    5.22
  13   6  -6    2.76    1.60
  13  -6  -6    1.69    1.97
  13   6  -5    1.33    1.34
 -13   6   5    3.61    1.96
  13   6  -4  318.99   16.60
 -13   6   4  300.55   16.63
 -13   6   3   67.00    6.39
  13   6  -3   73.44    6.40
  13  -6  -3   77.25    7.72
  13   6  -3   85.47    6.07
 -13   6   2 1142.47   50.20
  13   6  -2 1163.29   49.25
  13   6  -2 1213.25   50.32
  13  -6  -2 1204.99   53.39
 -13  -6   1   79.31    6.03
 -13   6   1   82.52    6.94
  13  -6  -1   80.87    8.46
  13   6  -1   78.15    5.94
 -13  -6   0  160.13    9.77
 -13   6   0  186.28   11.53
  13  -6   0  169.36   12.76
  13   6   0  183.64    9.91
 -13  -6  -1  154.44    8.65
 -13   6  -1  154.39    9.97
  13   6   1  153.24    8.43
 -13  -6  -2   87.92    5.62
  13   6   2   86.44    5.48
 -13   6  -2   99.52    7.01
 -13   6  -2  100.17    7.70
  13  -7  -8  211.20   11.27
  13  -7  -7  131.38    8.97
  13  -7  -7  134.15    9.19
  13   7  -6   13.20    2.32
  13  -7  -6   15.33    3.20
  13   7  -5    8.28    2.13
 -13   7   5    8.59    2.26
  13   7  -4  946.37   38.69
 -13   7   4  810.44   38.56
 -13   7   3   25.94    3.79
  13   7  -3   30.16    3.40
  13   7  -3   32.41    3.95
  13  -7  -3   27.91    4.96
 -13   7   2  427.94   21.24
  13   7  -2  434.52   20.25
 -13   7   2  427.20   21.88
  13   7  -2  453.99   21.19
  13  -7  -2  445.62   24.37
 -13  -7   1   61.70    4.97
 -13   7   1   68.35    6.06
  13  -7  -1   61.89    7.45
  13   7  -1   57.44    4.83
 -13  -7   0  343.97   16.43
 -13   7   0  372.30   18.36
  13  -7   0  339.48   20.31
  13   7   0  328.93   16.12
 -13   7  -1   14.52    2.84
 -13   7  -1   14.15    2.71
 -13  -7  -1   11.49    1.93
  13  -7   1   14.98    3.87
  13   7   1   14.80    2.13
 -13  -7  -2  891.65   37.80
  13   7   2  915.09   37.70
 -13   7  -2  973.07   40.56
  13  -7   2  980.18   41.97
  13  -8  -7   10.93    2.48
  13  -8  -7   13.93    2.78
  13   8  -6    0.85    1.09
  13  -8  -6    0.29    1.54
 -13   8   6    0.49    1.24
  13   8  -5   44.96    4.21
 -13   8   5   39.07    4.43
  13   8  -4  127.49    8.09
 -13   8   4  111.09    8.13
  13   8  -3   41.21    4.28
 -13   8   3   35.79    4.32
  13   8  -3   37.84    3.68
 -13   8   2  409.93   20.25
  13   8  -2  406.36   19.05
 -13   8   2  400.14   20.59
  13   8  -2  434.37   20.04
  13  -8  -2  445.59   23.80
 -13  -8   1   46.57    4.04
 -13   8   1   39.55    4.62
  13  -8  -1   51.47    6.83
  13   8  -1   43.65    3.88
 -13  -8   0  419.66   19.46
 -13   8   0  439.90   21.29
  13  -8   0  449.66   24.45
  13   8   0  432.81   19.34
  13  -8   1   33.93    5.64
  13   8   1   33.09    3.01
 -13  -8  -1   34.49    3.13
 -13   8  -1   35.93    4.03
 -13   8  -1   39.23    4.26
 -13   8  -2  519.61   24.05
  13  -9  -7   71.72    5.71
  13  -9  -6  345.23   17.30
 -13   9   6  334.63   16.77
  13   9  -5  377.81   17.20
 -13   9   5  351.89   17.84
  13  -9  -5  367.23   18.58
  13   9  -4   81.58    5.82
 -13   9   4   71.32    5.98
  13   9  -3  106.70    7.02
 -13   9   3   95.32    7.30
 -13   9   2    5.20    1.88
  13   9  -2   11.00    2.17
  13  -9  -2   11.21    3.65
  13   9  -2   11.27    1.92
 -13   9   1   95.72    7.11
  13  -9  -1   88.45    8.84
  13   9  -1   97.54    5.94
 -13  -9   0  946.59   39.92
 -13   9   0  966.95   41.71
  13  -9   0 1042.15   45.54
  13  -9   1    1.24    2.86
 -13   9  -1    1.74    1.19
 -13   9  -1    2.76    1.34
 -13  -9  -1    2.44    0.90
  13 -10  -6    2.05    1.41
 -13  10   6    2.50    1.26
  13  10  -5   23.95    2.62
 -13  10   5   27.50    3.21
  13 -10  -5   25.15    3.35
  13  10  -4  174.26    9.14
 -13  10   4  151.12    9.51
  13  10  -3    1.97    1.23
 -13  10   3    1.38    1.28
  13  10  -2  974.28   40.34
 -13  10   2  946.25   40.89
  13 -10  -1    7.46    2.86
 -13  10   1    8.08    1.98
 -13  10   0    7.75    2.05
 -13 -10   0   12.45    1.74
  13 -10   0   12.56    3.67
 -13  11   5   66.11    5.00
  13  11  -4  129.44    7.03
 -13  11   4  115.39    7.52
  13  11  -3  208.90   10.49
 -13  11   3  203.46   11.21
  13  11  -2   40.02    3.50
  13  11  -1   97.24    5.89
  13 -11  -1  111.41    8.47
  13  12  -3   39.02    3.12
  13  12  -2  187.97    9.24
  14   0  -8  420.84   18.59
  14   0  -8  403.39   18.94
  14   0  -7    0.19    1.08
  14   0  -7    0.91    1.29
  14   0  -6  287.72   14.69
  14   0  -5    0.47    1.33
  14   0  -5   -0.27    1.50
  14   0  -4  127.49    8.51
  14   0  -3    0.82    1.52
  14   0  -2  831.55   36.95
  14   0  -1    0.77    1.55
  14   0   0    0.46    1.39
  14   0   1    2.15    1.32
  14   0   2  156.84    8.69
  14   1  -8    3.43    1.18
  14  -1  -8    3.09    1.24
  14  -1  -8    4.76    1.65
  14   1  -8    3.04    1.44
  14   1  -7  120.86    7.32
  14  -1  -7  118.98    7.54
  14  -1  -7  110.14    7.70
  14   1  -6 1038.64   43.86
  14  -1  -6 1080.05   44.38
  14   1  -6 1001.89   44.58
  14   1  -5  135.12    8.69
  14  -1  -5  155.66    9.43
  14   1  -5  130.96    9.09
  14   1  -4  542.49   25.30
  14  -1  -4  566.49   25.95
  14  -1  -3  114.45    8.61
  14   1  -3  122.68    8.36
  14  -1  -2  125.16    8.84
  14   1  -2  115.73    8.25
  14  -1  -1   32.31    4.10
  14   1  -1   28.28    3.76
  14  -1   0  206.04   11.39
  14   1   0  180.47   10.78
  14  -1   1   50.05    4.59
  14   1   1   54.40    4.60
  14  -1   2   35.98    3.48
  14   1   2   39.13    3.51
  14  -2  -8 1071.23   43.67
  14   2  -8 1024.95   43.14
  14   2  -8 1045.82   42.73
  14  -2  -7    8.09    1.99
  14   2  -7   10.93    1.94
  14  -2  -7    7.78    2.06
  14  -2  -6  241.15   13.53
  14   2  -6  247.54   13.72
  14   2  -6  268.88   13.14
  14  -2  -6  253.66   13.61
  14   2  -5    2.16    1.51
  14   2  -5    2.29    1.40
  14  -2  -5    1.54    1.40
  14   2  -4  281.91   14.58
  14  -2  -4  294.18   15.64
  14   2  -3   17.68    2.86
  14  -2  -3   12.89    3.06
  14   2  -3   14.81    2.75
  14   2  -3   15.87    2.67
  14  -2  -2  688.40   31.27
  14   2  -2  625.05   29.88
  14   2  -2  709.34   30.09
  14  -2  -1  107.74    8.14
  14   2  -1  112.68    7.66
  14   2  -1  114.31    7.48
  14  -2   0  338.08   17.04
  14   2   0  333.44   16.31
  14   2   0  327.53   15.95
  14  -2   1   25.53    3.28
  14   2   1   22.96    2.84
 -14   2  -2   81.95    5.87
  14  -2   2   72.65    5.35
  14   2   2   69.27    4.91
  14   3  -8  103.03    5.93
  14  -3  -8  104.49    6.68
  14   3  -7   60.68    4.50
  14  -3  -7   59.41    4.73
  14  -3  -7   56.96    4.99
  14   3  -6  210.63   11.23
  14   3  -6  227.81   12.34
  14   3  -5   80.76    5.87
  14  -3  -5   77.94    6.59
 -14   3   5   95.24    7.75
  14   3  -5   80.34    6.57
  14   3  -4 1458.08   60.39
  14  -3  -4 1544.25   62.16
  14   3  -4 1430.19   61.45
  14   3  -3  111.78    7.49
  14   3  -3  110.16    7.25
  14  -3  -2   13.99    3.06
  14   3  -2    9.54    2.29
  14   3  -2   12.69    2.49
  14  -3  -1   13.63    2.91
  14   3  -1   20.90    2.90
  14   3  -1   14.88    2.53
  14  -3   0    4.48    2.05
  14   3   0    1.49    1.49
  14   3   0    3.39    1.36
  14  -3   1    2.54    1.49
  14   3   1    1.87    1.11
  14   3   1    0.15    1.01
 -14   3  -2  125.37    8.47
  14   4  -7   22.49    2.52
  14  -4  -7   27.94    3.14
  14  -4  -7   24.29    3.15
  14   4  -6  299.47   15.26
  14  -4  -6  325.69   16.34
  14   4  -6  290.14   14.28
  14   4  -5    3.22    1.67
 -14   4   5    3.72    1.92
  14   4  -5    1.77    1.14
  14   4  -4  175.22   10.56
  14   4  -3   32.88    3.66
  14   4  -2  703.29   30.78
  14   4  -1   76.13    5.62
 -14   4   0   87.71    7.06
  14   4   0   83.34    5.73
 -14   4  -1   89.66    6.94
  14   4   1   94.52    5.80
  14  -5  -7    1.17    1.23
  14  -5  -7    2.60    1.53
  14  -5  -6 1660.23   66.60
  14   5  -6 1546.28   64.88
 -14   5   5    8.87    2.50
  14   5  -5    8.20    2.11
 -14   5   4  134.72    9.34
  14   5  -4  140.66    8.87
 -14   5   3    7.12    2.16
  14   5  -3    7.81    2.04
  14   5  -3    4.72    1.70
  14   5  -2  296.01   14.63
  14   5  -1   25.85    3.05
 -14  -5   1   32.44    3.28
 -14   5   1   27.45    3.78
 -14   5   0  484.87   22.31
  14   5   0  435.00   20.10
 -14   5  -1   76.91    6.61
 -14   5  -1   80.24    6.26
  14   5   1   74.34    4.91
  14  -6  -7    1.76    1.25
  14  -6  -7    0.21    1.33
  14   6  -6  152.16    8.62
  14  -6  -6  150.79    9.86
  14   6  -5   13.11    2.29
 -14   6   5   10.38    2.39
  14   6  -4   59.00    5.09
 -14   6   4   62.38    5.60
  14   6  -3    3.79    1.53
  14   6  -3    6.18    1.63
 -14   6   3    4.57    1.93
 -14   6   2  579.67   26.78
  14  -6  -2  522.18   26.48
  14   6  -2  584.72   24.97
 -14  -6   1  134.22    7.40
 -14   6   1  124.62    8.44
  14   6  -1  127.64    7.29
  14   6   0  129.04    7.30
 -14   6   0  143.76    8.99
 -14  -6   0  123.02    7.20
  14   6   1   55.96    4.03
 -14   6  -1   69.08    5.49
 -14   6  -1   72.99    5.87
  14   7  -6  250.23   12.32
  14  -7  -6  264.63   14.03
  14   7  -5   52.17    4.41
 -14   7   5   58.93    5.14
  14   7  -4 1444.32   57.00
 -14   7   4 1317.50   57.55
  14   7  -3   36.84    3.66
 -14   7   3   34.26    4.03
  14  -7  -2   16.39    3.28
  14   7  -2   17.42    2.36
 -14   7   2   18.91    3.11
 -14   7   1   15.48    2.70
  14  -7  -1    9.91    2.72
  14   7  -1   12.18    1.92
 -14  -7   0   38.66    3.13
  14   7   0   31.29    2.90
 -14   7   0   42.48    4.29
  14  -7   0   27.37    3.80
  14   8  -6   59.05    4.16
  14  -8  -6   69.51    5.54
  14   8  -5    0.92    1.01
  14  -8  -5   -0.24    1.42
 -14   8   5    1.03    0.98
  14   8  -4  125.73    7.39
 -14   8   4  122.20    7.91
  14   8  -3   56.50    4.37
 -14   8   3   48.88    4.78
  14   8  -2  262.88   12.83
  14   8  -2  265.67   12.46
 -14   8   1    7.50    1.83
  14  -8  -1    8.04    2.45
  14   8  -1   10.77    1.67
 -14  -8   0  341.47   15.83
 -14   8   0  390.80   17.78
  14  -8   0  356.95   18.17
  14   8   0  371.42   15.83
  14   9  -5   86.08    5.18
 -14   9   5   85.60    5.84
  14  -9  -5   75.79    5.93
  14   9  -4  409.87   17.23
  14  -9  -4  354.09   17.97
 -14   9   4  361.83   17.76
  14   9  -3  196.83   10.02
 -14   9   3  199.77   10.96
  14   9  -2  106.32    6.21
 -14   9   1   99.23    6.73
  14  10  -4   44.33    3.36
  14  10  -3   27.61    2.59
  15   0  -7    0.31    0.99
  15   0  -7    0.27    0.95
  15   0  -6  196.67   10.24
  15   0  -5   -0.54    1.12
  15   0  -4   10.28    2.03
  15   0  -3    0.38    1.12
  15   0  -2    2.37    1.45
  15   0  -1   -0.36    1.06
  15   0   0  454.51   20.43
  15   1  -7  121.26    7.16
  15   1  -7  123.45    6.78
  15   1  -6   55.04    4.30
  15  -1  -6   61.57    4.66
  15   1  -5   79.15    5.63
  15  -1  -5   87.25    6.09
  15   1  -4   30.91    3.32
  15  -1  -4   34.92    3.69
  15   1  -3  179.45    9.95
  15  -1  -3  187.99   10.32
  15  -1  -2   -0.82    1.27
  15   1  -2    0.37    1.19
  15  -1  -1  112.28    7.41
  15   1  -1  122.37    7.39
  15  -1   0    8.98    1.87
  15   1   0   11.55    2.03
  15   2  -6   17.72    2.23
  15  -2  -6   17.41    2.47
  15   2  -5   12.37    2.22
  15   2  -5   10.12    1.78
  15  -2  -5   10.15    2.04
  15  -2  -4    2.68    1.51
  15   2  -4    1.83    1.14
  15   2  -3    7.86    1.72
  15  -2  -3    7.23    1.89
  15  -2  -2  203.65   11.16
  15   2  -2  204.82   10.62
  15   2  -2  186.51   10.13
  15  -2  -1   20.11    2.89
  15   2  -1   23.40    2.85
  15  -2   0  113.90    7.08
  15   2   0  100.73    6.46
  15   3  -6   42.01    3.40
  15   3  -5   46.83    4.21
  15   3  -5   45.26    3.74
  15  -3  -5   50.28    4.44
  15   3  -4   97.84    6.33
  15  -3  -4  112.46    7.35
 -15   3   4  117.79    8.10
  15   3  -3  105.98    6.47
  15  -3  -3  109.80    7.30
  15   3  -2  223.22   11.18
 -15   3   1   28.54    3.39
  15  -3  -1   24.74    3.18
  15   3  -1   21.00    2.60
  15   3  -1   22.01    2.53
  15   3   0  136.18    7.78
  15   3   0  152.42    7.80
  15   4  -6   71.24    4.96
  15   4  -5    3.23    1.32
 -15   4   5    4.61    1.74
 -15   4   4    0.49    1.21
 -15   4   3   80.96    6.41
  15   4  -2   12.64    2.01
 -15   4   2   14.97    2.72
 -15   4   1   77.91    5.78
  15   4  -1   68.69    4.67
 -15   4   0  558.19   24.85
  15   5  -6  375.70   16.82
  15   5  -5   38.81    3.54
 -15   5   5   52.90    4.67
  15   5  -4  139.77    7.91
 -15   5   4  140.18    8.87
 -15   5   3    4.40    1.57
  15   5  -2   61.28    4.27
 -15   5   2   56.24    5.16
  15   5  -1   40.36    3.22
 -15   5   1   42.10    4.06
 -15   6   5    2.36    1.27
  15  -6  -5    2.97    1.64
  15   6  -5    3.52    1.13
 -15   6   4    1.64    1.25
  15   6  -4    3.99    1.22
 -15   6   3    3.19    1.32
  15   6  -2   49.24    3.58
 -15   6   2   43.42    4.30
  15   6  -1   71.66    4.41
  15   7  -4   90.87    5.55
 -15   7   4  101.64    6.49
 -15   7   3    1.89    1.11
  16   0  -4    5.75    1.33
  16   0  -3    0.12    0.79
  16  -1  -4  745.40   31.07
  16  -1  -3  145.35    7.73
   0   0   0    0.00    0.00


TITL 22059_A#118_auto in P2(1)/c
REM P2(1)/c (#14 in standard setting)
CELL 1.54184  13.242791  17.153076   9.435118  90.0000 107.5139  90.0000
ZERR    4.00   0.000229   0.000271   0.000163   0.0000   0.0018   0.0000
LATT  1
SYMM -x, y+1/2,-z+1/2
SFAC C N F I
UNIT 72.00 8.00 12.00 12.00
REM  CrysAlisPro recorded range (K): Min=100.0; max=100.0; aver:100.0
TEMP -173
TREF
HKLF 4
END
_computing_structure_solution     'SHELXT 2014/5 (Sheldrick, 2014)'
_computing_structure_solution     'SHELXT 2018/2 (Sheldrick, 2018)'
;
_shelx_hkl_checksum                29928
_olex2_submission_special_instructions  'No special instructions were received'
_vrf_PLAT315_1ver0-22059_a_118
;
PROBLEM: Singly Bonded Carbon Detected (H-atoms Missing).         C1 Check 
RESPONSE: C1 and C7 are isocyanide carbons
;
