# Supplementary material for: Halogen Bonding Involving Isomeric Isocyanide/Nitrile Groups
Source: Preprints.org preprint supplement (doi:10.20944/preprints202307.1937.v1), 2023-07-28
Supplement: Supplementary file 7 [file supplementary › a231.cif]

data_2ver0-23155_a-231
_audit_creation_date               2023-01-10
_audit_creation_method
;
Olex2 1.5
(compiled 2022.04.07 svn.rca3783a0 for OlexSys, GUI svn.r6498)
;
_shelx_SHELXL_version_number       '2019/2'
_audit_contact_author_address      ?
_audit_contact_author_email        ?
_audit_contact_author_name         ''
_audit_contact_author_phone        ?
_publ_contact_author_id_orcid      ?
_publ_section_references
;
Bourhis, L.J., Dolomanov, O.V., Gildea, R.J., Howard, J.A.K., Puschmann, H.
 (2015). Acta Cryst. A71, 59-75.

Dolomanov, O.V., Bourhis, L.J., Gildea, R.J, Howard, J.A.K. & Puschmann, H.
 (2009), J. Appl. Cryst. 42, 339-341.

Sheldrick, G.M. (2015). Acta Cryst. C71, 3-8.
;
_chemical_name_common              ?
_chemical_name_systematic          ?
_chemical_formula_moiety           'C6 F3 I3, C4 H2 N'
_chemical_formula_sum              'C10 H2 F3 I3 N'
_chemical_formula_weight           573.83
_chemical_melting_point            ?
loop_
  _atom_type_symbol
  _atom_type_description
  _atom_type_scat_dispersion_real
  _atom_type_scat_dispersion_imag
  _atom_type_scat_source
 'C' 'C' 0.0181 0.0091 'International Tables Vol C Tables 4.2.6.8 and 6.1.1.4'
 'H' 'H' 0.0000 0.0000 'International Tables Vol C Tables 4.2.6.8 and 6.1.1.4'
 'F' 'F' 0.0727 0.0534 'International Tables Vol C Tables 4.2.6.8 and 6.1.1.4'
 'I' 'I' -0.3257 6.8362 'International Tables Vol C Tables 4.2.6.8 and 6.1.1.4'
 'N' 'N' 0.0311 0.0180 'International Tables Vol C Tables 4.2.6.8 and 6.1.1.4'

_shelx_space_group_comment
;
The symmetry employed for this shelxl refinement is uniquely defined
by the following loop, which should always be used as a source of
symmetry information in preference to the above space-group names.
They are only intended as comments.
;
_space_group_crystal_system        'monoclinic'
_space_group_IT_number             14
_space_group_name_H-M_alt          'P 1 21/n 1'
_space_group_name_Hall             '-P 2yn'
loop_
  _space_group_symop_operation_xyz
 'x, y, z'
 '-x+1/2, y+1/2, -z+1/2'
 '-x, -y, -z'
 'x-1/2, -y-1/2, z-1/2'

_cell_length_a                     7.9630(3)
_cell_length_b                     13.0858(4)
_cell_length_c                     12.9186(4)
_cell_angle_alpha                  90
_cell_angle_beta                   101.268(3)
_cell_angle_gamma                  90
_cell_volume                       1320.20(8)
_cell_formula_units_Z              4
_cell_measurement_reflns_used      5221
_cell_measurement_temperature      100(2)
_cell_measurement_theta_max        68.9400
_cell_measurement_theta_min        4.8220
_shelx_estimated_absorpt_T_max     ?
_shelx_estimated_absorpt_T_min     ?
_exptl_absorpt_coefficient_mu      55.951
_exptl_absorpt_correction_T_max    1.00000
_exptl_absorpt_correction_T_min    0.30988
_exptl_absorpt_correction_type     multi-scan
_exptl_absorpt_process_details
;
CrysAlisPro 1.171.41.122a (Rigaku Oxford Diffraction, 2021)
Empirical absorption correction using spherical harmonics,
implemented in SCALE3 ABSPACK scaling algorithm.
;
_exptl_absorpt_special_details     ?
_exptl_crystal_colour              colourless
_exptl_crystal_colour_lustre       .
_exptl_crystal_colour_modifier     .
_exptl_crystal_colour_primary      colourless
_exptl_crystal_density_diffrn      2.887
_exptl_crystal_density_meas        ?
_exptl_crystal_density_method      ?
_exptl_crystal_description         needle
_exptl_crystal_F_000               1020
_exptl_crystal_size_max            0.03
_exptl_crystal_size_mid            0.01
_exptl_crystal_size_min            0.01
_exptl_transmission_factor_max     ?
_exptl_transmission_factor_min     ?
_diffrn_reflns_av_R_equivalents    0.0468
_diffrn_reflns_av_unetI/netI       0.0419
_diffrn_reflns_Laue_measured_fraction_full  0.999
_diffrn_reflns_Laue_measured_fraction_max  0.997
_diffrn_reflns_limit_h_max         8
_diffrn_reflns_limit_h_min         -9
_diffrn_reflns_limit_k_max         15
_diffrn_reflns_limit_k_min         -15
_diffrn_reflns_limit_l_max         15
_diffrn_reflns_limit_l_min         -15
_diffrn_reflns_number              8039
_diffrn_reflns_point_group_measured_fraction_full  0.999
_diffrn_reflns_point_group_measured_fraction_max  0.997
_diffrn_reflns_theta_full          67.684
_diffrn_reflns_theta_max           69.091
_diffrn_reflns_theta_min           4.858
_diffrn_ambient_temperature        100(2)
_diffrn_detector_area_resol_mean   10.0000
_diffrn_detector_type              HyPix3000
_diffrn_measured_fraction_theta_full  0.999
_diffrn_measured_fraction_theta_max  0.997
_diffrn_measurement_details
;
List of Runs (angles in degrees, time in seconds):

  # Type    Start    End  Width  t~exp~   \w     \q     \k     \f   Frames
--------------------------------------------------------------------------
  1  \w    -45.00 -19.00   0.50    0.70    --  -35.49 105.00 121.00   52
  2  \w    -10.00  51.00   0.50    0.70    --   35.49-105.00  20.00  122
  3  \w     85.00 128.00   0.50    2.00    --  100.00 105.00 121.00   86
  4  \w     26.00 104.00   0.50    2.00    --  100.00-105.00  20.00  156
  5  \w    -96.00 -65.00   0.50    0.70    --  -35.49 -54.00-180.00   62
  6  \w    -91.00 -20.00   0.50    0.70    --  -35.49 -43.00-180.00  142
  7  \w   -105.00 -18.00   0.50    0.70    --  -35.49 -32.00  30.00  174
  8  \w    -76.00 -17.00   0.50    0.70    --  -35.49 -43.00   0.00  118
  9  \w     17.00  43.00   0.50    0.70    --   35.49  65.00 150.00   52
 10  \w     66.00  91.00   0.50    0.70    --   35.49-138.00  30.00   50
 11  \w     54.00 103.00   0.50    0.70    --   35.49  65.00 150.00   98
 12  \w     54.00  89.00   0.50    0.70    --   35.49  54.00-120.00   70
 13  \w     16.00  91.00   0.50    0.70    --   35.49-138.00-180.00  150
 14  \w     23.00  49.00   0.50    0.70    --   35.49-138.00  30.00   52
 15  \w     22.00  48.00   0.50    0.70    --   35.49  54.00-120.00   52
 16  \w     61.00  87.00   0.50    2.00    --  100.00-125.00 120.00   52
 17  \w    126.00 152.00   0.50    2.00    --  100.00  30.00 -90.00   52
 18  \w     55.00 102.00   0.50    2.00    --  100.00 -77.00  60.00   94
 19  \w     31.00  57.00   0.50    2.00    --  100.00-125.00 120.00   52
 20  \w     30.00  55.00   0.50    2.00    --  100.00-107.00 -90.00   50
 21  \w     80.00 112.00   0.50    2.00    --  100.00  30.00 -90.00   64
 22  \w     95.00 155.00   0.50    2.00    --  100.00 107.00  90.00  120
 23  \w     64.00 120.00   0.50    2.00    --  100.00 -53.00  60.00  112
 24  \w     84.00 148.00   0.50    2.00    --  100.00  77.00 -60.00  128
 25  \w     36.00  62.00   0.50    2.00    --  100.00 -53.00  60.00   52
 26  \w     77.00 116.00   0.50    2.00    --  100.00 125.00  60.00   78
 27  \w     67.00 106.00   0.50    2.00    --  100.00 -91.00  30.00   78
 28  \w     79.00 105.00   0.50    2.00    --  100.00-107.00 -90.00   52
 29  \w    114.00 155.00   0.50    2.00    --  100.00  45.00   0.00   82
 30  \w     32.00  58.00   0.50    2.00    --  100.00 -91.00  30.00   52
 31  \w    132.00 157.00   0.50    2.00    --  100.00  91.00  60.00   50
 32  \w    132.00 157.00   0.50    2.00    --  100.00 107.00-180.00   50
 33  \w     84.00 121.00   0.50    2.00    --  100.00  45.00 150.00   74
 34  \w     73.00 103.00   0.50    2.00    --  100.00-107.00   0.00   60
 35  \w     98.00 124.00   0.50    2.00    --  100.00  91.00  60.00   52
 36  \w     33.00 125.00   0.50    2.00    --  100.00 -61.00-180.00  184
 37  \w     33.00 114.00   0.50    2.00    --  100.00 -53.00   0.00  162
 38  \w    105.00 153.00   0.50    2.00    --  100.00  22.00-120.00   96
 39  \w     32.00  58.00   0.50    0.70    --   35.49  65.00-180.00   52
 40  \w    -11.00  14.00   0.50    0.70    --  -35.49  43.00  90.00   50
 41  \w    -51.00 -18.00   0.50    0.70    --  -35.49  43.00  90.00   66
 42  \w    -51.00  26.00   0.50    0.70    --  -35.49  54.00-120.00  154
 43  \w     -5.00  28.00   0.50    0.70    --  -35.49  43.00 -30.00   66
 44  \w    -52.00 -27.00   0.50    0.70    --  -35.49  43.00 -30.00   50
 45  \w     71.00  96.00   0.50    0.70    --   35.49-138.00-150.00   50
 46  \w    -28.00  -2.00   0.50    0.70    --   35.49 -89.00  60.00   52
 47  \w    -28.00  19.00   0.50    0.70    --   35.49 -54.00  60.00   94
 48  \w    -22.00  36.00   0.50    0.70    --   35.49 -54.00  30.00  116
 49  \w    -17.00  10.00   0.50    0.70    --   35.49 -32.00 150.00   54
 50  \w     78.00 103.00   0.50    0.70    --   35.49  65.00-180.00   50
 51  \w     51.00  77.00   0.50    0.70    --   35.49-138.00  90.00   52
 52  \w     91.00 133.00   0.50    2.00    --  100.00 -86.00-150.00   84
 53  \w     62.00  88.00   0.50    2.00    --  100.00 -86.00-150.00   52
 54  \w     30.00  58.00   0.50    2.00    --  100.00 -30.00   0.00   56
 55  \w     81.00 107.00   0.50    2.00    --  100.00  30.00-120.00   52
 56  \w     57.00  93.00   0.50    2.00    --  100.00-149.00-150.00   72
;
_diffrn_measurement_device         'four-circle diffractometer'
_diffrn_measurement_device_type   
 'SuperNova, Single source at offset/far, HyPix3000'
_diffrn_measurement_method         '\w scans'
_diffrn_radiation_type             CuK\a
_diffrn_radiation_wavelength       1.54184
_diffrn_source                     ?
_reflns_Friedel_coverage           0.000
_reflns_Friedel_fraction_full      .
_reflns_Friedel_fraction_max       .
_reflns_number_gt                  2187
_reflns_number_total               2454
_reflns_special_details
;
 Reflections were merged by SHELXL according to the crystal
 class for the calculation of statistics and refinement.
 
 _reflns_Friedel_fraction is defined as the number of unique
 Friedel pairs measured divided by the number that would be
 possible theoretically, ignoring centric projections and
 systematic absences.
;
_reflns_threshold_expression       'I > 2\s(I)'
_computing_cell_refinement         'CrysAlisPro 1.171.41.122a (Rigaku OD, 2021)'
_computing_data_collection         'CrysAlisPro 1.171.41.122a (Rigaku OD, 2021)'
_computing_data_reduction          'CrysAlisPro 1.171.41.122a (Rigaku OD, 2021)'
_computing_molecular_graphics      'Olex2 1.5 (Dolomanov et al., 2009)'
_computing_publication_material    'Olex2 1.5 (Dolomanov et al., 2009)'
_computing_structure_refinement    'SHELXL 2019/2 (Sheldrick, 2015)'
_computing_structure_solution      'olex2.solve 1.5 (Bourhis et al., 2015)'
_refine_diff_density_max           1.039
_refine_diff_density_min           -0.817
_refine_diff_density_rms           0.174
_refine_ls_extinction_coef         .
_refine_ls_extinction_method       none
_refine_ls_goodness_of_fit_ref     1.062
_refine_ls_hydrogen_treatment      constr
_refine_ls_matrix_type             full
_refine_ls_number_parameters       154
_refine_ls_number_reflns           2454
_refine_ls_number_restraints       0
_refine_ls_R_factor_all            0.0329
_refine_ls_R_factor_gt             0.0288
_refine_ls_restrained_S_all        1.062
_refine_ls_shift/su_max            0.001
_refine_ls_shift/su_mean           0.000
_refine_ls_structure_factor_coef   Fsqd
_refine_ls_weighting_details      
 'w=1/[\s^2^(Fo^2^)+(0.0382P)^2^] where P=(Fo^2^+2Fc^2^)/3'
_refine_ls_weighting_scheme        calc
_refine_ls_wR_factor_gt            0.0728
_refine_ls_wR_factor_ref           0.0747
_refine_special_details            ?
_olex2_refinement_description
;
1.a Aromatic/amide H refined with riding coordinates:
 C3(H3), C4(H4)
;
_atom_sites_solution_hydrogens     geom
_atom_sites_solution_primary       iterative
_atom_sites_solution_secondary     ?
loop_
  _atom_site_label
  _atom_site_type_symbol
  _atom_site_fract_x
  _atom_site_fract_y
  _atom_site_fract_z
  _atom_site_U_iso_or_equiv
  _atom_site_adp_type
  _atom_site_occupancy
  _atom_site_site_symmetry_order
  _atom_site_calc_flag
  _atom_site_refinement_flags_posn
  _atom_site_refinement_flags_adp
  _atom_site_refinement_flags_occupancy
  _atom_site_disorder_assembly
  _atom_site_disorder_group
 I1 I 0.38818(5) 0.69367(3) 0.31282(3) 0.02637(12) Uani 1 1 d . . . . .
 I2 I 0.11513(4) 0.30635(3) 0.47174(2) 0.01999(11) Uani 1 1 d . . . . .
 I3 I 0.35654(5) 0.65648(3) 0.77328(2) 0.02677(12) Uani 1 1 d . . . . .
 F1 F 0.2364(4) 0.4705(3) 0.3234(2) 0.0258(7) Uani 1 1 d . . . . .
 F2 F 0.2016(4) 0.4430(2) 0.6813(2) 0.0254(7) Uani 1 1 d . . . . .
 F3 F 0.4369(4) 0.7369(2) 0.5589(2) 0.0254(7) Uani 1 1 d . . . . .
 C5 C 0.3362(7) 0.6072(4) 0.4381(4) 0.0207(11) Uani 1 1 d . . . . .
 C6 C 0.2657(6) 0.5104(4) 0.4218(4) 0.0195(11) Uani 1 1 d . . . . .
 C7 C 0.2205(7) 0.4526(4) 0.5028(4) 0.0216(11) Uani 1 1 d . . . . .
 C8 C 0.2507(6) 0.4957(4) 0.6025(4) 0.0208(11) Uani 1 1 d . . . . .
 C9 C 0.3255(7) 0.5912(4) 0.6237(4) 0.0206(11) Uani 1 1 d . . . . .
 C10 C 0.3671(7) 0.6435(4) 0.5400(4) 0.0220(11) Uani 1 1 d . . . . .
 N1 N 0.2032(6) 0.9225(4) 0.5488(3) 0.0221(10) Uani 1 1 d . . . . .
 C1 C 0.0780(8) 0.8875(5) 0.5660(4) 0.0287(12) Uani 1 1 d . . . . .
 C2 C 0.3525(7) 0.9633(4) 0.5248(4) 0.0218(11) Uani 1 1 d . . . . .
 C3 C 0.3479(7) 1.0017(4) 0.4246(4) 0.0233(11) Uani 1 1 d . . . . .
 H3 H 0.243796 1.002300 0.374043 0.028 Uiso 1 1 calc R U . . .
 C4 C 0.5021(7) 0.9604(5) 0.6010(4) 0.0275(12) Uani 1 1 d . . . . .
 H4 H 0.501879 0.933133 0.669140 0.033 Uiso 1 1 calc R U . . .

loop_
  _atom_site_aniso_label
  _atom_site_aniso_U_11
  _atom_site_aniso_U_22
  _atom_site_aniso_U_33
  _atom_site_aniso_U_23
  _atom_site_aniso_U_13
  _atom_site_aniso_U_12
 I1 0.0319(2) 0.0294(2) 0.01946(19) 0.00610(13) 0.00930(15) -0.00264(14)
 I2 0.02266(19) 0.0231(2) 0.01502(16) 0.00014(11) 0.00575(13) -0.00123(12)
 I3 0.0349(2) 0.0307(2) 0.01552(18) -0.00525(13) 0.00714(14) 0.00030(15)
 F1 0.0340(17) 0.0318(17) 0.0124(13) -0.0025(13) 0.0064(12) -0.0027(14)
 F2 0.0359(18) 0.0274(17) 0.0153(13) 0.0020(13) 0.0108(12) -0.0040(14)
 F3 0.0305(17) 0.0217(16) 0.0258(15) -0.0023(13) 0.0102(13) -0.0050(13)
 C5 0.024(3) 0.022(3) 0.020(2) 0.007(2) 0.012(2) 0.005(2)
 C6 0.021(3) 0.029(3) 0.009(2) 0.000(2) 0.0060(18) 0.002(2)
 C7 0.023(3) 0.024(3) 0.020(2) 0.000(2) 0.009(2) -0.003(2)
 C8 0.022(3) 0.026(3) 0.015(2) 0.004(2) 0.005(2) 0.004(2)
 C9 0.021(3) 0.024(3) 0.018(2) -0.002(2) 0.005(2) 0.007(2)
 C10 0.023(3) 0.023(3) 0.021(3) -0.001(2) 0.005(2) 0.004(2)
 N1 0.023(2) 0.027(2) 0.018(2) -0.0043(18) 0.0085(18) -0.0050(19)
 C1 0.038(3) 0.027(3) 0.023(3) 0.002(2) 0.009(2) 0.000(3)
 C2 0.029(3) 0.019(3) 0.020(2) -0.002(2) 0.009(2) 0.002(2)
 C3 0.025(3) 0.029(3) 0.016(2) 0.004(2) 0.005(2) -0.006(2)
 C4 0.031(3) 0.037(3) 0.016(2) 0.005(2) 0.008(2) -0.003(3)

_geom_special_details
;
 All esds (except the esd in the dihedral angle between two l.s. planes)
 are estimated using the full covariance matrix.  The cell esds are taken
 into account individually in the estimation of esds in distances, angles
 and torsion angles; correlations between esds in cell parameters are only
 used when they are defined by crystal symmetry.  An approximate (isotropic)
 treatment of cell esds is used for estimating esds involving l.s. planes.
;
loop_
  _geom_bond_atom_site_label_1
  _geom_bond_atom_site_label_2
  _geom_bond_distance
  _geom_bond_site_symmetry_2
  _geom_bond_publ_flag
 I1 C5 2.081(5) . ?
 I2 C7 2.097(6) . ?
 I3 C9 2.083(5) . ?
 F1 C6 1.351(6) . ?
 F2 C8 1.349(6) . ?
 F3 C10 1.345(7) . ?
 C5 C6 1.386(8) . ?
 C5 C10 1.376(7) . ?
 C6 C7 1.394(7) . ?
 C7 C8 1.384(7) . ?
 C8 C9 1.388(8) . ?
 C9 C10 1.374(8) . ?
 N1 C1 1.157(7) . ?
 N1 C2 1.393(7) . ?
 C2 C3 1.381(7) . ?
 C2 C4 1.389(7) . ?
 C3 H3 0.9500 . ?
 C3 C4 1.392(8) 3_676 ?
 C4 H4 0.9500 . ?

loop_
  _geom_angle_atom_site_label_1
  _geom_angle_atom_site_label_2
  _geom_angle_atom_site_label_3
  _geom_angle
  _geom_angle_site_symmetry_1
  _geom_angle_site_symmetry_3
  _geom_angle_publ_flag
 C6 C5 I1 121.0(4) . . ?
 C10 C5 I1 122.1(4) . . ?
 C10 C5 C6 116.9(5) . . ?
 F1 C6 C5 119.1(5) . . ?
 F1 C6 C7 118.3(5) . . ?
 C5 C6 C7 122.6(5) . . ?
 C6 C7 I2 120.3(4) . . ?
 C8 C7 I2 122.7(4) . . ?
 C8 C7 C6 117.0(5) . . ?
 F2 C8 C7 118.1(5) . . ?
 F2 C8 C9 119.2(4) . . ?
 C7 C8 C9 122.7(5) . . ?
 C8 C9 I3 121.4(4) . . ?
 C10 C9 I3 121.5(4) . . ?
 C10 C9 C8 116.9(5) . . ?
 F3 C10 C5 118.5(5) . . ?
 F3 C10 C9 117.6(5) . . ?
 C9 C10 C5 123.8(5) . . ?
 C1 N1 C2 178.2(5) . . ?
 C3 C2 N1 118.7(5) . . ?
 C3 C2 C4 122.4(5) . . ?
 C4 C2 N1 118.8(5) . . ?
 C2 C3 H3 120.5 . . ?
 C2 C3 C4 119.0(5) . 3_676 ?
 C4 C3 H3 120.5 3_676 . ?
 C2 C4 C3 118.6(5) . 3_676 ?
 C2 C4 H4 120.7 . . ?
 C3 C4 H4 120.7 3_676 . ?

loop_
  _geom_torsion_atom_site_label_1
  _geom_torsion_atom_site_label_2
  _geom_torsion_atom_site_label_3
  _geom_torsion_atom_site_label_4
  _geom_torsion
  _geom_torsion_site_symmetry_1
  _geom_torsion_site_symmetry_2
  _geom_torsion_site_symmetry_3
  _geom_torsion_site_symmetry_4
  _geom_torsion_publ_flag
 I1 C5 C6 F1 2.4(7) . . . . ?
 I1 C5 C6 C7 -176.4(4) . . . . ?
 I1 C5 C10 F3 -1.6(7) . . . . ?
 I1 C5 C10 C9 176.1(4) . . . . ?
 I2 C7 C8 F2 -3.5(7) . . . . ?
 I2 C7 C8 C9 177.9(4) . . . . ?
 I3 C9 C10 F3 3.2(7) . . . . ?
 I3 C9 C10 C5 -174.5(4) . . . . ?
 F1 C6 C7 I2 1.4(7) . . . . ?
 F1 C6 C7 C8 -179.5(5) . . . . ?
 F2 C8 C9 I3 -1.9(6) . . . . ?
 F2 C8 C9 C10 -177.5(4) . . . . ?
 C5 C6 C7 I2 -179.8(4) . . . . ?
 C5 C6 C7 C8 -0.7(8) . . . . ?
 C6 C5 C10 F3 179.4(4) . . . . ?
 C6 C5 C10 C9 -2.9(8) . . . . ?
 C6 C7 C8 F2 177.4(4) . . . . ?
 C6 C7 C8 C9 -1.2(8) . . . . ?
 C7 C8 C9 I3 176.7(4) . . . . ?
 C7 C8 C9 C10 1.0(8) . . . . ?
 C8 C9 C10 F3 178.9(4) . . . . ?
 C8 C9 C10 C5 1.1(8) . . . . ?
 C10 C5 C6 F1 -178.6(5) . . . . ?
 C10 C5 C6 C7 2.6(8) . . . . ?
 N1 C2 C3 C4 -177.9(5) . . . 3_676 ?
 N1 C2 C4 C3 177.9(5) . . . 3_676 ?
 C3 C2 C4 C3 0.4(10) . . . 3_676 ?
 C4 C2 C3 C4 -0.4(10) . . . 3_676 ?

_shelx_res_file
;
TITL
    2ver0-23155_a-231.res
    created by SHELXL-2019/2 at 12:00:26 on 05-Oct-2022
CELL 1.54184 7.962992 13.085794 12.918606 90 101.2676 90
ZERR 4 0.000272 0.000446 0.000389 0 0.0031 0
LATT 1
SYMM 0.5-X,0.5+Y,0.5-Z
SFAC C H F I N
UNIT 40 8 12 12 4

L.S. 10
PLAN  10
TEMP -173
CONF
MORE -1
fmap 2
BOND $H
ACTA
REM <olex2.extras>
REM <HklSrc "%.\\2ver0-23155_a-231.hkl">
REM </olex2.extras>

WGHT    0.038200
FVAR       0.17164
I1    4    0.388182    0.693667    0.312823    11.00000    0.03194    0.02944 =
         0.01946    0.00610    0.00930   -0.00264
I2    4    0.115129    0.306348    0.471743    11.00000    0.02266    0.02313 =
         0.01502    0.00014    0.00575   -0.00123
I3    4    0.356541    0.656484    0.773281    11.00000    0.03495    0.03074 =
         0.01552   -0.00525    0.00714    0.00030
F1    3    0.236436    0.470456    0.323428    11.00000    0.03400    0.03182 =
         0.01237   -0.00252    0.00644   -0.00268
F2    3    0.201614    0.442984    0.681272    11.00000    0.03593    0.02735 =
         0.01525    0.00203    0.01081   -0.00403
F3    3    0.436885    0.736874    0.558898    11.00000    0.03052    0.02166 =
         0.02578   -0.00234    0.01019   -0.00504
C5    1    0.336200    0.607239    0.438055    11.00000    0.02352    0.02172 =
         0.02000    0.00680    0.01166    0.00526
C6    1    0.265732    0.510370    0.421775    11.00000    0.02112    0.02941 =
         0.00913   -0.00040    0.00598    0.00242
C7    1    0.220508    0.452596    0.502784    11.00000    0.02280    0.02401 =
         0.01987   -0.00015    0.00885   -0.00333
C8    1    0.250705    0.495723    0.602500    11.00000    0.02220    0.02569 =
         0.01497    0.00404    0.00506    0.00421
C9    1    0.325460    0.591229    0.623677    11.00000    0.02109    0.02354 =
         0.01765   -0.00247    0.00520    0.00687
C10   1    0.367087    0.643496    0.539974    11.00000    0.02298    0.02275 =
         0.02059   -0.00122    0.00496    0.00429
N1    5    0.203174    0.922460    0.548766    11.00000    0.02335    0.02669 =
         0.01819   -0.00430    0.00854   -0.00497
C1    1    0.077987    0.887495    0.566005    11.00000    0.03801    0.02652 =
         0.02277    0.00243    0.00887   -0.00009
C2    1    0.352540    0.963278    0.524762    11.00000    0.02865    0.01850 =
         0.02007   -0.00166    0.00943    0.00225
C3    1    0.347870    1.001726    0.424646    11.00000    0.02467    0.02934 =
         0.01612    0.00415    0.00480   -0.00551
AFIX  43
H3    2    0.243796    1.002300    0.374043    11.00000   -1.20000
AFIX   0
C4    1    0.502052    0.960379    0.600999    11.00000    0.03099    0.03661 =
         0.01599    0.00491    0.00756   -0.00345
AFIX  43
H4    2    0.501879    0.933133    0.669140    11.00000   -1.20000
AFIX   0
HKLF 4


REM
REM wR2 = 0.0747, GooF = S = 1.062, Restrained GooF = 1.062 for all data
REM R1 = 0.0288 for 2187 Fo > 4sig(Fo) and 0.0329 for all 2454 data
REM 154 parameters refined using 0 restraints

END

WGHT      0.0383      0.0000

REM Highest difference peak  1.039,  deepest hole -0.817,  1-sigma level  0.174
Q1    1   0.1361  0.3011  0.5629  11.00000  0.05    1.04
Q2    1   0.3482  0.6424  0.6754  11.00000  0.05    0.91
Q3    1   0.3817  0.6538  0.8613  11.00000  0.05    0.86
Q4    1   0.4048  0.6783  0.4035  11.00000  0.05    0.79
Q5    1   0.0913  0.3059  0.3760  11.00000  0.05    0.76
Q6    1   0.3490  0.6901  0.2218  11.00000  0.05    0.72
Q7    1   0.5105  0.6322  0.2949  11.00000  0.05    0.67
Q8    1  -0.1731  0.8527  0.5192  11.00000  0.05    0.64
Q9    1  -0.0768  0.3617  0.3615  11.00000  0.05    0.61
Q10   1   0.3031  0.7153  0.6000  11.00000  0.05    0.60
;
_shelx_res_checksum                97361
_shelx_hkl_file
;
   0   0   1    0.62    0.85
   0   0  -1    1.07    1.46
   0   0   1    0.24    0.70
   0   0  -1    0.22    0.78
   0   0   2   17.46    2.05
   0   0  -2   17.46    2.29
   0   0   2   15.41    2.44
   0   0  -2   17.98    3.39
   0   0   3    2.66    2.26
   0   0  -3    4.92    2.37
   0   0  -3    1.32    3.53
   0   0   3    0.98    1.75
   0   0  -4 1911.05  104.96
   0   0  -4 2015.86  105.88
   0   0   4 1885.05  104.74
   0   0   4 2016.28  105.79
   0   0   5   -0.97    2.81
   0   0  -5    2.22    2.86
   0   0   6  155.65   12.36
   0   0  -6  157.68   11.95
   0   0  -7    1.74    3.33
   0   0  -7   -1.10    2.79
   0   0  -8  421.48   26.53
   0   0  -8  400.54   28.67
   0   0  -9   -2.10    3.22
   0   0  -9   -0.29    1.88
   0   0   9    1.61    2.59
   0   0  -9    0.53    1.62
   0   0  -9    2.68    1.91
   0   0 -10   35.03    3.91
   0   0 -10   26.64    3.56
   0   0 -11    0.56    1.73
   0   0 -11    2.20    1.82
   0   0 -11   -0.92    2.20
   0   0 -12   73.59    6.04
   0   0 -12   61.29    6.00
   0   0 -13   -0.86    1.83
   0   0 -13    0.27    1.92
   0   0 -13   -0.78    1.72
   0   0 -14  197.74   12.62
   0   0 -14  216.61   12.74
   0   0 -15   -0.46    1.23
   0   0 -15    1.35    1.35
   0  -1   0    0.58    0.49
   0   1   0    0.03    0.34
   0   1   0    0.69    0.63
   0  -1   1  387.56   19.26
   0   1   1  348.40   19.60
   0   1  -1  370.06   19.32
   0  -1  -1  357.53   19.41
   0   1  -1  350.80   19.32
   0   1   1  320.66   19.29
   0  -1  -1  343.06   19.22
   0  -1  -1  344.20   19.43
   0  -1  -1  372.53   19.18
   0   1   2  112.62    7.60
   0  -1  -2  107.73    7.38
   0   1  -2  124.67    6.89
   0  -1  -2  122.52    7.60
   0   1   2  118.01    7.65
   0  -1  -2  119.21    7.56
   0   1  -2  126.84    7.39
   0   1   3   18.78    3.07
   0  -1   3   22.39    3.64
   0   1   3   18.64    2.93
   0  -1  -3   26.13    3.63
   0  -1   3   22.16    2.50
   0  -1  -3   20.60    3.14
   0   1  -4 4651.01  245.28
   0   1   4 4351.31  244.03
   0  -1  -4 4631.87  244.64
   0   1   4 4850.34  245.16
   0  -1   4 4759.97  245.77
   0  -1  -4 4514.24  244.89
   0  -1   5  112.06    9.62
   0  -1  -5  116.09    9.19
   0   1  -5  126.45    9.67
   0  -1  -5  108.41    9.22
   0  -1   6   67.60    7.63
   0  -1  -6   72.55    7.31
   0   1  -6   73.36    7.32
   0  -1  -6   71.72    7.23
   0  -1   7  154.95   13.71
   0  -1  -7  176.95   15.14
   0   1  -7  168.66   14.66
   0   1  -7  182.00   13.18
   0   1  -8 1492.36   84.40
   0   1   8 1439.64   82.06
   0   1  -8 1493.10   81.62
   0  -1  -8 1372.73   83.95
   0   1  -9  205.61   18.30
   0  -1  -9  216.55   13.59
   0  -1  -9  221.63   13.63
   0   1   9  205.54   16.86
   0  -1  -9  158.03   17.03
   0  -1  -9  213.22   13.73
   0   1  -9  202.93   13.61
   0   1  -9  239.68   13.71
   0   1  -9  226.93   16.67
   0   1  -9  227.59   13.62
   0  -1 -10  203.02   12.29
   0  -1 -10  187.16   11.91
   0   1 -10  193.52   12.18
   0   1 -10  174.22   11.90
   0  -1 -10  168.32   11.98
   0  -1 -11  249.18   15.68
   0   1 -11  243.57   15.69
   0   1 -11  250.89   15.90
   0  -1 -11  294.66   16.27
   0  -1 -11  248.53   15.97
   0   1 -12   87.18    7.19
   0  -1 -12  104.28    7.76
   0  -1 -12   98.73    7.53
   0   1 -12  107.22    7.67
   0   1 -12  106.65    7.71
   0  -1 -12   90.67    7.20
   0   1 -13  231.03   14.25
   0  -1 -13  222.37   14.09
   0  -1 -13  241.82   14.38
   0  -1 -13  228.52   14.49
   0   1 -13  227.18   14.31
   0   1 -14   16.30    2.46
   0  -1 -14   12.55    2.35
   0  -1 -14   14.80    2.39
   0   1 -14   15.70    2.57
   0   1 -15   10.86    1.86
   0   1 -15   10.87    1.85
   0  -1 -15   11.74    1.77
   0  -1 -15   10.59    1.86
   0   2   0 1288.05   67.06
   0   2   0 1218.37   67.31
   0   2   0 1295.17   67.05
   0  -2   0 1227.80   67.24
   0   2  -1  107.64    6.25
   0  -2  -1  103.03    5.94
   0  -2  -1  105.52    6.52
   0   2  -1  108.78    6.04
   0   2   1   97.22    5.87
   0   2  -1  110.35    6.33
   0   2   1   99.26    6.42
   0  -2   1  100.82    6.42
   0  -2  -1  106.29    6.71
   0  -2  -1  102.87    6.81
   0  -2  -1  100.28    6.15
   0  -2   2   91.42    5.61
   0   2   2   77.18    5.33
   0   2   2   81.06    6.21
   0   2  -2   81.45    5.60
   0   2  -2   77.79    5.65
   0  -2  -2   95.45    5.49
   0  -2  -2   80.05    5.96
   0  -2  -2   92.13    5.99
   0   2   2   88.50    5.78
   0  -2  -3  161.86   11.12
   0   2   3  165.38   11.14
   0  -2  -3  178.57   11.10
   0   2   3  167.35   10.85
   0   2  -3  185.67   10.81
   0  -2  -3  171.17   10.53
   0  -2  -4  965.86   53.55
   0  -2  -4  984.58   54.01
   0   2   4  942.32   53.70
   0   2   4  976.07   53.75
   0  -2  -4  992.09   54.19
   0  -2   4  995.21   55.28
   0  -2   5 1095.84   61.03
   0  -2  -5 1069.02   59.79
   0  -2  -5 1056.53   59.57
   0   2  -5 1038.86   59.75
   0   2   5 1085.58   59.45
   0  -2   6  189.54   14.43
   0   2   6  192.20   13.24
   0  -2  -6  172.95   13.15
   0  -2  -6  198.20   15.87
   0   2  -6  177.00   13.22
   0   2  -6  156.48   13.94
   0   2  -7  169.24   14.68
   0  -2  -7  173.25   15.31
   0  -2   7  163.64   14.29
   0  -2  -7  181.81   13.77
   0   2  -7  161.73   13.21
   0   2   7  192.33   13.75
   0  -2   8   56.04    7.86
   0   2  -8   61.27    8.23
   0   2  -8   56.68    6.98
   0  -2  -8   44.78    7.66
   0   2   8   57.47    7.21
   0  -2  -9 1056.02   54.52
   0  -2  -9  883.49   59.63
   0   2  -9  999.74   54.34
   0   2  -9 1027.30   54.35
   0  -2  -9  955.00   54.34
   0   2  -9  865.26   59.24
   0  -2  -9  973.41   54.22
   0   2  -9  995.41   57.73
   0   2   9  980.09   58.40
   0   2 -10   -0.31    1.71
   0   2 -10   -0.30    1.71
   0  -2 -10    3.85    2.16
   0  -2 -10    2.84    2.21
   0   2 -11   78.25    6.27
   0   2 -11   69.31    5.93
   0  -2 -11   61.34    6.05
   0   2 -11   80.39    6.29
   0  -2 -11   72.51    5.91
   0  -2 -11   66.73    6.07
   0  -2 -12   93.44    7.14
   0   2 -12   94.35    7.25
   0   2 -12   99.94    7.52
   0  -2 -12  102.41    7.53
   0  -2 -12   93.22    7.54
   0   2 -13    0.55    1.93
   0  -2 -13    3.36    2.12
   0   2 -13    1.03    1.75
   0  -2 -14  103.35    7.40
   0   2 -14  100.92    7.41
   0   2 -15  257.70   14.36
   0  -2 -15  245.96   14.22
   0   2 -15  243.97   14.30
   0  -3   0   -0.72    2.17
   0   3   0    0.29    1.13
   0  -3   0    0.14    1.43
   0   3   0    1.22    1.80
   0  -3  -1 1146.46   63.95
   0   3  -1 1165.00   63.18
   0  -3  -1 1186.79   63.67
   0   3   1 1165.74   63.14
   0  -3  -1 1178.88   62.90
   0   3  -1 1247.95   63.03
   0   3  -1 1091.25   63.28
   0  -3  -1 1167.92   63.24
   0   3  -1 1176.20   63.54
   0  -3   1 1292.00   63.71
   0  -3  -2   47.91    3.79
   0   3  -2   56.35    4.18
   0   3   2   51.02    4.31
   0   3  -2   43.35    4.04
   0  -3  -2   47.79    4.34
   0   3   2   49.86    4.88
   0   3  -3  350.73   21.16
   0   3  -3  364.03   21.12
   0  -3  -3  354.95   21.47
   0   3   3  384.95   21.48
   0   3   3  383.59   21.31
   0   3   3  361.98   21.88
   0   3   4  299.78   18.12
   0  -3  -4  287.03   18.31
   0  -3  -4  298.22   18.82
   0   3   4  284.19   18.43
   0  -3   4  295.55   19.73
   0   3  -4  310.60   18.01
   0  -3  -5  248.66   18.78
   0  -3  -5  222.57   14.85
   0  -3  -5  221.94   15.40
   0   3  -5  201.12   14.73
   0  -3   5  211.61   15.92
   0   3   5  209.75   14.32
   0  -3  -6   85.70    8.36
   0  -3   6  102.40    9.72
   0  -3  -6   98.92   11.03
   0   3  -6   72.80    7.96
   0   3   6   78.69    7.75
   0   3   7  281.78   19.50
   0   3  -7  280.44   19.62
   0  -3  -7  287.76   19.98
   0  -3   7  293.38   21.23
   0   3   8   19.88    4.50
   0  -3   8   10.53    4.07
   0  -3  -8   19.95    4.96
   0   3  -8   19.22    4.72
   0   3  -9  528.12   32.43
   0   3   9  613.06   36.89
   0  -3  -9  638.33   32.93
   0   3  -9  550.43   32.42
   0  -3  -9  570.51   32.50
   0   3  -9  588.44   36.20
   0  -3 -10  218.54   13.87
   0   3 -10  199.72   13.55
   0   3 -10  220.62   13.83
   0  -3 -10  211.99   13.63
   0   3 -11  369.82   20.73
   0  -3 -11  336.85   20.26
   0  -3 -11  328.01   20.56
   0   3 -11  323.62   20.05
   0   3 -11  339.65   20.44
   0   3 -12   19.27    3.01
   0   3 -12   13.30    2.70
   0  -3 -12   20.44    3.15
   0  -3 -13  955.36   53.24
   0   3 -13  986.78   53.31
   0   3 -13  977.94   53.43
   0   3 -14   69.10    5.42
   0   3 -14   72.46    5.32
   0   3 -15   12.64    1.73
   0   3 -15   11.10    1.76
   0  -4   0    4.22    1.78
   0   4   0    2.10    2.01
   0  -4   0    2.29    2.56
   0   4   1   20.21    2.92
   0  -4  -1   19.35    2.43
   0   4  -1   17.77    2.22
   0  -4  -1   19.89    3.54
   0   4  -1   18.86    2.89
   0  -4   1   16.58    2.59
   0  -4  -2  442.58   26.68
   0   4  -2  434.52   25.58
   0  -4   2  449.53   26.12
   0   4  -2  491.66   25.83
   0  -4  -2  437.61   26.11
   0   4   2  450.08   26.86
   0   4   2  475.33   26.18
   0   4   3  209.22   14.09
   0  -4  -3  215.75   13.60
   0   4  -3  188.65   12.95
   0  -4   3  213.78   13.60
   0   4   3  204.88   13.35
   0   4  -3  225.48   13.18
   0   4  -4  250.37   15.78
   0   4   4  268.10   16.30
   0  -4   4  229.10   17.53
   0   4   4  249.23   16.66
   0  -4  -4  256.31   16.29
   0  -4  -5 2441.41  126.99
   0   4  -5 2046.98  126.69
   0   4   5 2404.25  127.15
   0   4   5 2456.12  126.78
   0  -4   5 2247.97  128.56
   0   4  -5 2391.50  126.27
   0  -4   6  168.31   15.09
   0   4  -6  204.68   14.70
   0  -4  -6  188.39   14.23
   0   4   6  193.67   14.12
   0   4  -7   10.00    3.83
   0  -4   7   13.66    4.40
   0   4   7    3.84    3.00
   0  -4  -7    6.35    3.42
   0  -4  -8  100.04    7.17
   0   4   8   98.34    9.94
   0  -4  -8   95.57   10.16
   0  -4   8   88.52   10.60
   0   4  -8   95.79    7.02
   0   4  -8   83.75    9.28
   0   4  -8   76.92    6.55
   0   4  -9 1373.50   77.73
   0   4  -9 1332.09   73.53
   0   4  -9 1285.32   73.57
   0   4   9 1349.86   77.71
   0  -4  -9 1436.65   73.96
   0  -4 -10   20.96    3.52
   0   4 -10   19.22    3.18
   0   4 -10   17.60    2.93
   0   4 -11   73.30    6.05
   0   4 -11   71.91    6.26
   0   4 -11   80.07    6.58
   0   4 -12   29.39    3.80
   0   4 -12   35.83    3.95
   0   4 -12   32.14    3.69
   0   4 -13    8.68    2.24
   0   4 -13    8.20    2.10
   0   4 -14   69.79    4.92
   0   4 -14   60.61    4.89
   0  -5   0    2.05    2.80
   0  -5   0    1.64    1.59
   0   5   0   -1.09    2.06
   0   5  -1 1411.01   77.21
   0  -5  -1 1504.12   78.24
   0   5  -1 1340.88   76.82
   0   5   1 1420.11   77.32
   0  -5   1 1423.10   77.24
   0  -5   1 1499.14   77.78
   0   5  -2  190.83   12.04
   0   5   2  186.16   13.33
   0  -5  -2  198.26   12.66
   0  -5  -2  185.38   13.30
   0  -5   2  182.49   12.39
   0   5   3    1.46    2.20
   0  -5   3    1.87    1.96
   0   5  -3   -0.61    2.03
   0  -5  -3    2.56    2.33
   0   5   3    0.93    2.91
   0  -5   4  233.01   17.28
   0   5   4  286.27   18.39
   0  -5  -4  286.52   17.65
   0   5   4  253.59   17.22
   0   5  -4  285.60   17.16
   0   5   5 1075.95   61.56
   0   5   5 1110.51   60.96
   0   5  -5 1085.03   60.41
   0  -5   5 1056.62   61.19
   0  -5  -5 1060.29   60.95
   0  -5  -6  277.05   19.22
   0  -5   6  265.08   19.17
   0   5  -6  248.66   18.98
   0   5   6  305.23   19.36
   0  -5   7    0.77    2.85
   0  -5   7    0.99    3.03
   0   5  -7   -0.73    3.30
   0   5   7    0.69    2.73
   0  -5  -7   -1.52    3.24
   0  -5   8  444.94   31.14
   0   5  -8  441.61   29.17
   0   5  -8  457.80   25.62
   0   5   8  444.08   29.20
   0  -5  -8  432.76   29.70
   0  -5   8  379.52   28.88
   0   5  -9  150.17   10.70
   0   5  -9  168.75   11.08
   0   5 -10  119.03    9.11
   0   5 -10  136.57    9.52
   0   5 -11  121.98    9.21
   0   5 -11  141.78    9.67
   0   5 -12  161.94   11.14
   0   5 -12  176.67   11.43
   0   5 -13  394.30   22.70
   0   5 -14   36.40    3.29
   0  -6   0 2057.48  113.65
   0   6   0 2113.75  112.90
   0  -6   1  700.78   38.43
   0   6   1  691.13   38.70
   0  -6   1  666.31   39.14
   0   6  -1  674.89   38.53
   0  -6  -1  684.57   38.96
   0  -6  -1  640.43   39.44
   0   6   2  415.59   25.68
   0   6  -2  400.95   23.99
   0   6   2  424.21   24.69
   0  -6   2  385.58   24.25
   0  -6  -2  413.97   24.69
   0  -6  -3  585.69   35.74
   0   6  -3  616.82   35.32
   0  -6   3  637.88   36.05
   0   6   3  617.81   37.04
   0   6   4  648.32   38.40
   0   6  -4  671.21   37.88
   0   6   4  662.71   39.42
   0  -6   4  631.12   38.43
   0  -6  -4  643.92   38.38
   0  -6  -5  252.76   18.83
   0  -6   5  266.52   19.26
   0   6  -5  268.63   18.49
   0   6   5  302.94   20.31
   0   6   5  324.13   19.73
   0  -6  -6    2.85    3.24
   0  -6   6    3.68    2.90
   0   6   6    1.33    2.89
   0   6  -6    5.01    3.45
   0   6  -7   16.59    5.03
   0  -6   7   15.19    4.57
   0   6  -7   17.01    2.81
   0  -6  -7   13.28    4.22
   0   6   7   13.69    4.59
   0   6  -8    3.42    3.63
   0   6   8    0.85    2.94
   0   6  -8    1.59    1.82
   0   6  -9  565.48   32.60
   0   6  -9  571.40   32.72
   0   6 -10   26.41    3.69
   0   6 -10   28.52    3.83
   0   6 -11   13.68    2.89
   0   6 -11    8.48    2.29
   0   6 -12   18.95    2.98
   0   6 -12   13.46    2.53
   0   6 -13   12.26    2.29
   0   6 -14   15.86    2.07
   0  -6  14   14.58    2.07
   0   7   0    1.27    2.57
   0  -7   0    1.72    3.48
   0  -7  -1  517.11   31.61
   0   7   1  523.12   30.35
   0  -7  -1  505.30   30.60
   0   7   1  480.23   31.11
   0   7   2  116.82    9.18
   0   7   2   97.51    9.86
   0  -7  -2   92.03    8.78
   0  -7  -3  114.31    9.70
   0   7   3  105.79    9.49
   0  -7   3  105.77    9.35
   0   7   3  109.43   10.49
   0  -7   4  800.43   50.17
   0   7   4  835.22   50.05
   0   7   4  944.77   52.05
   0  -7  -4  913.52   50.63
   0  -7   5  907.92   55.35
   0  -7  -5  991.70   55.59
   0   7   5  945.02   56.25
   0  -7  -6   31.02    5.70
   0  -7   6   29.55    5.83
   0   7  -6   24.44    3.14
   0   7   6   33.94    6.00
   0   7   7  113.06   11.82
   0   7  -8  569.38   32.69
   0   7  -9   48.91    4.95
   0   7  -9   48.82    5.03
   0  -7 -10  137.93    9.76
   0   7 -10  133.59    9.62
   0   7 -10  130.97    9.52
   0   7 -11   32.21    3.87
   0   7 -11   30.94    3.76
   0   7 -12   64.54    5.45
   0   7 -12   67.11    5.38
   0   7 -13    0.18    1.51
   0  -8   0 1355.70   79.62
   0   8   0 1437.53   78.15
   0  -8  -1  587.89   36.60
   0   8   1  673.36   36.64
   0   8   1  555.42   37.15
   0  -8  -2    3.01    2.91
   0   8   2    7.25    3.24
   0   8   2    3.74    3.41
   0   8   3  639.95   37.07
   0  -8  -3  599.76   37.07
   0   8   3  583.26   38.25
   0   8   4  304.56   20.19
   0   8   4  282.91   21.16
   0  -8   4  252.09   19.47
   0  -8  -4  283.67   20.10
   0  -8   5   27.90    5.50
   0  -8  -5   33.19    6.20
   0   8  -5   32.43    3.61
   0   8  -5   34.01    3.55
   0   8   5   38.35    6.31
   0  -8  -5   30.75    4.69
   0   8   5   32.19    6.39
   0   8   6  639.67   37.94
   0   8  -6  574.78   32.84
   0  -8  -7   24.27    4.99
   0   8  -7   18.44    3.10
   0  -8  -8   57.58    6.52
   0   8  -9   16.47    3.00
   0  -8  -9   22.88    4.19
   0  -8 -10   39.25    4.64
   0   8 -10   35.60    4.08
   0   8 -11   32.53    3.57
   0  -8 -11   25.65    3.46
   0   8 -12   28.07    3.15
   0  -8  13   10.68    2.14
   0  -9   0    0.68    2.58
   0   9   0   -0.82    3.33
   0   9   1    6.84    3.59
   0  -9  -1    6.87    3.58
   0   9   1   15.25    4.74
   0   9  -1   10.29    2.39
   0   9  -2   26.89    3.05
   0  -9  -2   35.03    5.70
   0   9   2   29.26    5.46
   0   9  -2   25.29    3.17
   0   9   2   34.35    6.29
   0   9  -3   21.93    2.85
   0   9  -3   18.57    2.93
   0   9   3   14.77    5.17
   0   9   3   12.45    4.28
   0  -9  -4  566.09   29.95
   0  -9  -4  497.11   33.18
   0   9   4  574.80   33.57
   0   9  -4  480.47   28.77
   0   9  -4  503.09   28.85
   0  -9  -5    4.93    3.30
   0   9  -5    6.23    2.17
   0  -9  -6   51.68    6.35
   0   9  -6   63.06    5.29
   0  -9  -7   98.20    9.25
   0   9  -7  114.00    8.39
   0  -9  -8   18.59    4.19
   0  -9  -9  101.25    8.46
   0  -9 -10  825.26   45.87
   0  -9 -11  107.53    7.54
   0  -9  12   43.62    3.91
   0  10   0  206.82   12.79
   0  10  -1   -0.23    1.89
   0  10  -1    0.63    1.75
   0  10   1   -2.13    3.55
   0  10   2  350.46   24.05
   0  10  -2  336.59   19.88
   0  10  -2  341.74   19.74
   0  10  -3    2.92    2.08
   0  10  -3    5.79    2.04
   0 -10  -4   12.10    3.39
   0  10  -4   14.54    2.83
   0  10  -4   16.98    2.88
   0 -10  -5  132.67   10.03
   0  10  -5  124.74    8.77
   0 -10  -6  374.76   23.24
   0 -10  -7   39.44    5.56
   0  10  -7   36.94    4.45
   0 -10  -8  164.62   12.02
   0 -10  -9  151.77   10.77
   0 -10  10   12.97    3.25
   0 -10 -10   18.95    3.28
   0 -10 -11    2.74    1.93
   0 -10  11    0.58    1.83
   0  11   0   -1.00    2.17
   0  11  -1  182.25   10.95
   0  11  -1  154.32   10.50
   0  11   1  161.14   10.75
   0  11  -2    2.86    1.88
   0  11  -2    2.83    2.27
   0  11  -3    4.98    2.12
   0  11  -3    4.19    2.43
   0  11  -4   25.77    3.43
   0  11  -4   27.30    3.57
   0  11  -5  187.93   11.96
   0 -11  -5  184.73   12.95
   0 -11  -6  123.51    9.98
   0 -11  -6  130.56    9.45
   0  11  -7    2.56    2.06
   0 -11  -7    7.47    3.60
   0 -11   8    4.91    2.48
   0 -11  -8    4.21    3.03
   0 -11  -9    9.65    2.97
   0 -11   9   13.24    2.52
   0 -11 -10  497.67   27.93
   0  12   0    8.88    2.58
   0  12  -1  265.19   16.15
   0  12   1  266.82   16.16
   0  12  -2  100.57    7.14
   0  12  -2   85.33    6.73
   0  12   2   89.02    6.98
   0 -12   3  200.32   13.61
   0  12   3  192.06   12.86
   0  12  -3  223.78   13.12
   0  12  -3  205.73   12.85
   0  12  -4    1.26    2.13
   0 -12   4    2.76    3.04
   0 -12  -5    7.29    3.81
   0 -12   5   10.81    3.60
   0  12  -5    9.73    2.47
   0 -12   6  268.35   16.11
   0 -12  -6  217.14   15.61
   0 -12  -6  255.44   15.40
   0 -12  -7   29.83    4.00
   0 -12  -7   23.30    3.96
   0  12  -7   19.21    3.14
   0 -12  -8   36.83    4.49
   0 -12   8   50.38    4.46
   0 -12   9  277.14   16.04
   0 -12  -9  278.16   16.45
   0 -12 -10   11.42    2.04
   0  13   0    1.77    2.21
   0  13   1  278.12   16.66
   0  13  -1  275.80   16.68
   0  13  -2    3.01    2.21
   0  13   2    2.74    2.35
   0  13  -2    4.03    2.26
   0  13   3   15.66    2.90
   0  13  -3   20.56    3.13
   0  13  -3   21.76    2.98
   0 -13  -4   14.13    4.17
   0 -13   4   12.60    3.08
   0  13  -4   10.45    2.45
   0  13   4   11.74    2.63
   0 -13   5  708.12   39.98
   0 -13  -5  709.06   39.53
   0 -13  -6    2.00    3.12
   0  13  -6    3.18    1.97
   0 -13   6    1.44    2.43
   0 -13  -7   47.10    4.65
   0 -13   7   54.93    4.82
   0 -13  -7   51.59    4.92
   0  13  -7   51.61    4.58
   0 -13  -8    3.50    2.16
   0 -13   8    6.74    1.88
   0  14   0    7.36    2.59
   0  14   1  293.93   17.50
   0  14  -1  302.21   17.56
   0 -14  -2   11.11    4.78
   0  14   2   15.78    2.75
   0  14  -2   17.22    2.75
   0  14  -3  241.91   14.33
   0  14   3  242.32   14.46
   0 -14  -3  240.60   15.43
   0 -14  -4   -0.50    3.39
   0 -14  -5   30.77    4.14
   0 -14   5   26.48    3.40
   0  14  -5   27.46    3.32
   0  14  -6   17.51    2.57
   0 -14  -6   19.38    3.13
   0 -14   6   22.81    2.90
   0 -14   7   13.97    2.09
   0  15   0    1.05    1.71
   0  15   1  111.08    7.37
   0  15   2    0.17    1.57
   0  15   3    1.06    1.58
   0 -15  -3    1.72    3.22
   0 -15  -4    9.73    3.07
   0  15  -4   24.49    2.65
   1   0 -15  115.38    7.42
   1   0 -15  111.26    7.33
   1   0 -14    0.23    1.63
   1   0 -14    0.71    1.67
   1   0 -13   10.44    2.69
   1   0 -13   17.12    2.83
   1   0 -12   -0.29    1.87
   1   0 -12   -0.63    2.09
   1   0 -11 1321.11   72.21
   1   0 -10    0.29    2.04
  -1   0  10   -0.90    2.78
  -1   0  10   -2.69    3.00
  -1   0   9  560.81   36.16
  -1   0   9  583.91   36.50
  -1   0   8    1.37    2.45
  -1   0   8    0.70    2.44
  -1   0   7 1215.71   66.79
  -1   0   7 1139.05   66.68
  -1   0   6   -0.47    2.20
   1   0  -6   -1.67    2.66
   1   0  -5  482.05   29.34
   1   0  -5  493.41   29.03
  -1   0   5  523.05   29.66
   1   0  -4    0.59    2.42
  -1   0   4    1.03    2.30
  -1   0   4    0.30    2.29
  -1   0   3  121.58    8.50
   1   0  -3  115.10    8.06
  -1   0   3  122.82    8.37
  -1   0   3  119.40    8.00
  -1   0   3  109.35    7.77
  -1   0   2   -0.15    1.21
  -1   0   2    1.37    1.61
   1   0  -2   -0.14    1.49
  -1   0   2    1.32    1.92
  -1   0   2    1.55    1.12
   1   0  -1  146.86    8.81
   1   0  -1  150.93    8.57
  -1   0   1  154.05    8.94
  -1   0   1  153.52    9.01
  -1   0   1  156.13    8.78
  -1   0   0    1.32    0.89
   1   0   0    0.16    0.59
  -1   0   0    0.74    1.04
  -1   0   0    1.02    1.10
  -1   0   0    0.24    0.70
  -1   0   0    0.21    0.84
   1   0   0    0.49    0.76
  -1   0  -1    6.32    1.51
  -1   0  -1    3.34    1.11
  -1   0  -1    4.87    1.31
   1   0   1    4.95    0.85
  -1   0  -1    2.14    0.96
  -1   0  -1    4.87    1.00
  -1   0  -2    3.90    2.39
  -1   0  -2    0.15    1.67
  -1   0  -2    0.20    1.81
  -1   0  -2    0.40    1.38
  -1   0  -2    0.77    1.80
  -1   0  -2    0.45    1.69
  -1   0  -3 2413.70  127.38
  -1   0  -3 2472.92  129.37
  -1   0  -3 2271.72  128.57
  -1   0  -4    4.49    3.37
  -1   0  -4   -7.89    3.86
   1   0   5    3.74    2.71
  -1   0  -5    0.82    3.39
  -1   0  -5   -1.17    3.64
  -1   0  -6    0.65    3.33
  -1   0  -6   -1.89    2.90
   1   0   6    0.64    2.53
  -1   0  -7 1250.92   78.84
   1   0   7 1329.64   77.13
  -1   0  -7 1450.52   77.15
   1   0   8    0.87    2.90
  -1   0  -8   -0.73    3.26
  -1   0  -8   -1.10    3.24
  -1   0  -9  119.50    8.73
  -1   0  -9  114.75   13.24
  -1   0  -9  129.74   12.08
  -1   0  -9  135.97    9.12
  -1   0  -9  114.48    8.57
  -1   0  -9  125.69    8.63
  -1   0 -10   -1.35    2.15
  -1   0 -10    0.60    2.05
  -1   0 -10    0.62    1.92
  -1   0 -11  198.60   13.52
  -1   0 -11  212.06   13.51
  -1   0 -11  225.61   13.64
  -1   0 -12    1.98    1.89
  -1   0 -12    0.28    1.86
  -1   0 -12   -0.31    1.86
  -1   0 -13  520.96   28.98
  -1   0 -13  496.13   29.10
  -1   0 -13  517.94   29.01
  -1   0 -14    0.21    1.39
  -1   0 -14    0.19    1.42
   1   1 -15  485.61   26.12
   1   1 -15  466.22   26.09
   1  -1 -15  455.90   26.05
   1   1 -14   80.50    6.18
   1   1 -14   88.94    6.25
   1  -1 -14   78.10    6.01
   1  -1 -14   79.43    6.16
   1  -1 -13  607.57   33.15
   1   1 -13  618.83   33.32
   1   1 -13  564.13   33.25
   1  -1 -13  561.84   33.21
   1  -1 -12    9.99    2.50
   1  -1 -12    9.78    2.63
   1   1 -12    6.59    2.33
   1  -1 -12   10.44    2.43
   1   1 -12   11.99    2.66
   1   1 -11   42.80    4.48
   1  -1 -11   33.78    4.01
   1  -1 -11   32.42    4.13
   1  -1 -11   31.72    4.08
  -1  -1  10   80.36    9.26
  -1   1  10   77.40    9.13
   1  -1 -10   68.23    5.82
   1  -1 -10   69.39    6.12
   1   1 -10   71.46    6.01
   1  -1 -10   67.94    6.00
  -1  -1  10   70.64    8.94
   1  -1  -9  276.20   22.68
   1  -1  -9  301.07   17.82
   1   1  -9  306.24   17.78
  -1  -1   9  272.37   20.93
   1   1  -9  295.63   17.78
   1  -1  -9  301.41   17.65
   1   1  -9  306.71   23.38
  -1  -1   9  281.28   21.32
  -1   1   9  306.15   21.59
   1  -1  -9  294.71   17.77
  -1   1   9  265.38   20.81
  -1  -1   8   32.68    5.40
  -1   1   8   36.80    5.69
   1   1  -8   34.28    5.42
  -1   1   8   32.63    5.38
   1   1  -7 1268.99   72.47
  -1   1   7 1365.63   73.41
   1  -1  -7 1344.05   73.35
  -1   1   7 1232.79   72.92
  -1   1   6  382.37   21.79
  -1   1   6  330.04   21.28
   1  -1  -6  322.30   21.24
  -1   1   6  355.45   21.75
   1   1  -6  297.44   20.70
  -1   1   5   42.68    5.26
   1  -1  -5   40.50    5.01
  -1   1   5   39.08    4.75
  -1   1   5   43.37    4.67
  -1   1   5   33.19    4.49
  -1  -1   5   38.08    4.73
  -1   1   4    2.33    1.84
   1  -1  -4    3.65    2.42
  -1   1   4    2.96    2.73
  -1  -1   4    5.93    2.36
  -1   1   4    3.78    1.99
  -1   1   3 1224.00   65.38
  -1   1   3 1227.56   65.33
  -1   1   3 1243.27   66.09
  -1  -1   3 1201.49   65.60
   1  -1  -3 1151.06   65.35
  -1   1   2  160.10    9.26
  -1   1   2  147.71   10.07
  -1  -1   2  132.35    9.14
  -1   1   2  152.61    8.99
   1  -1  -2  149.14    9.18
  -1   1   2  171.66    9.37
  -1   1   1  213.72   11.84
  -1   1   1  215.79   11.76
   1  -1  -1  201.61   11.58
  -1  -1   1  194.73   11.32
   1  -1  -1  204.39   11.78
  -1   1   1  212.24   11.56
   1  -1  -1  198.80   11.75
  -1  -1   1  216.39   11.68
  -1   1   1  227.29   12.68
  -1   1   0   91.73    5.44
   1   1   0   76.81    5.29
  -1  -1   0   91.22    5.77
  -1   1   0   87.27    5.34
  -1   1   0   95.16    5.43
  -1  -1   0  106.72    5.88
  -1   1   0  100.03    5.68
   1   1   0   96.51    5.25
  -1   1   0   97.67    5.61
   1  -1   0   93.99    5.76
  -1  -1   0   89.06    5.60
  -1   1   0   89.44    6.02
  -1  -1   0  100.37    5.74
  -1   1   0   89.10    5.63
   1  -1   0   95.93    5.43
   1  -1   0   98.93    5.72
  -1   1   0   89.50    6.07
  -1   1  -1    2.97    1.04
   1   1   1    2.46    0.60
  -1   1  -1    2.91    1.30
  -1  -1  -1    1.24    0.86
  -1   1  -1    1.26    1.03
  -1   1  -1    1.95    1.04
  -1  -1  -1    3.12    1.36
  -1   1  -1    3.64    1.74
  -1  -1  -1    3.56    1.19
  -1  -1  -1    2.75    1.13
  -1   1  -1    3.01    2.00
   1  -1   1    1.88    1.17
  -1  -1  -1    4.05    1.35
  -1  -1  -1    2.60    1.58
  -1   1  -2 1025.62   57.10
  -1  -1  -2 1107.13   57.74
  -1   1  -2 1037.16   57.16
  -1  -1  -2 1068.44   56.96
  -1   1  -2 1002.93   58.52
  -1   1  -2 1042.87   57.77
  -1  -1  -2 1038.53   57.28
  -1   1  -2 1128.19   58.08
  -1  -1  -2 1038.39   57.41
  -1  -1  -2 1211.21   58.45
  -1  -1  -3   38.52    4.37
  -1  -1  -3   45.35    5.39
  -1   1  -3   33.58    3.35
  -1  -1  -3   29.19    4.47
  -1  -1  -3   43.87    3.96
  -1   1  -3   39.69    4.74
  -1   1  -3   29.94    5.51
  -1   1  -3   34.70    3.50
  -1   1  -3   35.77    3.63
   1   1   4   63.50    6.38
  -1   1  -4   58.19    7.03
  -1  -1  -4   84.56    7.27
  -1   1  -4   74.66    7.96
  -1  -1  -4   50.53    7.62
  -1  -1  -4   73.81    6.16
  -1  -1  -5  263.17   16.49
   1  -1   5  223.06   17.05
  -1   1  -5  296.72   18.37
   1   1   5  271.60   17.17
  -1   1  -5  247.41   18.41
  -1  -1  -5  257.94   17.44
  -1  -1  -6  798.31   45.95
   1  -1   6  712.36   45.81
  -1   1  -6  758.11   47.31
  -1   1  -6  860.08   46.28
  -1  -1  -6  717.54   48.20
  -1   1  -7 1166.93   70.37
  -1   1  -7 1221.94   68.35
   1  -1   7 1155.36   69.01
  -1  -1  -7 1164.10   71.38
  -1  -1  -7 1226.49   68.49
  -1  -1  -8    9.73    4.18
  -1  -1  -8   19.69    5.74
  -1   1  -8   15.89    5.07
   1  -1   8   14.86    4.78
  -1   1  -8   17.41    4.48
  -1  -1  -9  322.36   26.59
   1   1   9  323.24   24.17
  -1  -1  -9  350.08   21.07
  -1   1  -9  375.25   20.91
  -1  -1  -9  353.29   21.13
  -1  -1  -9  343.69   20.83
  -1   1  -9  370.23   21.00
  -1   1  -9  362.71   20.90
  -1   1  -9  349.50   21.16
  -1   1  -9  304.38   25.93
  -1   1  -9  348.46   24.40
  -1  -1 -10   29.83    4.10
  -1   1 -10   38.23    4.15
  -1   1 -10   38.11    4.15
  -1   1 -10   38.73    4.41
  -1  -1 -10   40.52    4.37
  -1  -1 -10   34.11    4.13
  -1   1 -10   40.93    4.32
  -1   1 -11 1041.73   58.67
  -1   1 -11 1037.82   58.49
  -1  -1 -11 1057.50   58.56
  -1  -1 -11 1138.29   58.94
  -1   1 -11 1062.18   58.97
  -1   1 -12    0.86    2.01
  -1   1 -12    0.91    1.84
  -1  -1 -12    2.46    2.04
  -1   1 -12    1.40    1.84
  -1  -1 -12    3.05    2.07
  -1  -1 -13    9.79    2.19
  -1  -1 -13    9.41    2.29
  -1   1 -13    7.62    2.22
  -1   1 -13    9.92    2.34
  -1   1 -13    8.83    2.23
  -1   1 -14    3.06    1.62
  -1  -1 -14   -0.55    1.35
  -1   1 -14    1.87    1.61
  -1   1 -14    2.00    1.46
   1  -2 -15   35.62    3.36
   1   2 -15   41.71    3.50
   1   2 -15   40.58    3.40
   1  -2 -14   -0.45    1.82
   1   2 -14    0.93    1.88
   1   2 -14    0.67    1.65
   1   2 -13   27.81    3.50
   1  -2 -13   28.02    3.60
   1   2 -13   31.30    3.67
   1   2 -12   41.26    4.39
   1   2 -12   33.00    4.17
   1  -2 -12   45.43    4.65
   1  -2 -11  875.14   49.60
   1  -2 -11  891.60   49.62
   1  -2 -11  964.18   50.03
   1   2 -11  848.80   49.57
   1  -2 -10   78.84    6.44
   1   2 -10   67.21    6.11
   1   2 -10   75.85    6.21
   1  -2 -10   77.46    6.27
   1  -2 -10   79.84    6.63
   1   2  -9   95.43    7.11
  -1   2   9   83.91    9.68
  -1  -2   9   62.66    8.72
   1   2  -9  102.98    9.93
  -1  -2   9   77.97    9.68
   1  -2  -9   94.24    7.06
   1  -2  -9   85.97   10.70
   1   2  -9   75.49   10.19
   1   2  -9  109.67    7.28
   1  -2  -9   91.21    7.12
   1  -2  -9  108.55    7.41
  -1   2   8    0.70    2.36
   1   2  -8    1.29    2.74
   1  -2  -8    5.07    3.49
   1  -2  -7  389.02   24.82
   1  -2  -7  387.50   24.66
  -1   2   7  415.50   24.69
  -1   2   7  386.22   24.77
  -1   2   7  368.27   24.58
   1   2  -7  343.70   24.02
   1  -2  -6 1935.92  103.49
  -1   2   6 1816.18  102.77
   1  -2  -6 1835.12  103.16
  -1   2   6 1889.75  102.84
  -1   2   6 1943.00  103.27
  -1   2   5    1.09    2.07
  -1   2   5    2.88    2.75
  -1   2   5   -0.39    2.10
   1  -2  -5    0.82    2.41
   1  -2  -5   -1.78    2.51
  -1   2   4  454.33   25.91
  -1   2   4  460.07   26.73
   1  -2  -4  430.47   26.13
   1  -2  -4  417.77   26.44
  -1   2   4  480.81   26.30
  -1   2   3  342.19   19.46
   1  -2  -3  297.23   19.92
   1  -2  -3  337.43   19.69
  -1   2   3  338.17   20.54
  -1   2   3  368.20   19.85
   1  -2  -2 3699.27  194.92
  -1   2   2 3813.69  194.96
   1  -2  -2 3649.35  195.36
   1   2  -2 3603.09  194.72
   1  -2  -2 3594.36  195.03
   1  -2  -2 3722.79  195.08
  -1   2   2 3730.86  196.20
  -1   2   2 3669.36  194.71
  -1  -2   2 3693.21  195.20
  -1   2   2 3651.13  195.00
   1  -2  -1   25.68    2.57
  -1   2   1   27.20    2.74
  -1  -2   1   27.23    2.73
  -1   2   1   26.60    2.49
  -1  -2   1   22.24    2.05
   1  -2  -1   29.66    2.70
   1  -2  -1   27.42    2.50
   1   2  -1   25.53    2.01
   1  -2  -1   26.55    2.64
  -1   2   1   29.17    3.78
  -1   2   1   24.54    2.45
  -1  -2   0  332.83   19.04
  -1   2   0  345.70   19.97
  -1  -2   0  355.33   19.36
  -1   2   0  358.78   19.09
   1  -2   0  369.86   19.30
  -1   2   0  359.15   19.77
   1  -2   0  358.17   19.27
  -1  -2   0  327.61   18.70
  -1   2   0  357.45   19.00
  -1   2   0  357.17   18.74
  -1   2   0  310.58   18.45
   1   2   0  375.37   18.89
  -1   2   0  311.12   18.68
  -1  -2   0  346.30   18.42
  -1   2  -1  321.79   18.65
   1   2   1  336.71   18.15
  -1   2  -1  339.77   18.30
   1  -2   1  348.03   18.60
  -1   2  -1  357.44   18.43
  -1   2  -1  335.62   17.87
  -1  -2  -1  305.35   18.11
  -1   2  -1  332.65   18.37
  -1   2  -1  310.51   18.17
  -1  -2  -1  339.97   18.38
  -1  -2  -1  325.67   18.15
  -1   2  -1  290.82   18.08
  -1   2  -1  293.27   19.43
  -1  -2  -2  517.91   29.47
  -1   2  -2  547.20   29.44
  -1  -2  -2  535.40   29.85
  -1   2  -2  413.76   31.16
  -1   2  -2  525.39   29.44
  -1  -2  -2  555.54   29.50
   1  -2   2  559.56   29.74
  -1  -2  -2  537.86   29.56
  -1   2  -3 1119.68   63.99
  -1  -2  -3 1239.79   66.15
  -1  -2  -3 1200.98   65.29
  -1  -2  -3 1106.40   64.12
  -1   2  -3 1276.29   66.97
  -1  -2  -3 1186.32   64.24
  -1   2  -3 1280.44   65.34
  -1   2  -3 1168.18   63.96
  -1   2  -4  112.36    9.75
  -1   2  -4  112.95    8.37
  -1  -2  -4  124.78    9.01
  -1   2  -4  126.03   10.63
  -1  -2  -4  125.38    8.85
  -1   2  -4  108.47    8.16
  -1  -2  -4   86.92   10.28
  -1  -2  -5   18.95    5.89
  -1   2  -5   34.66    5.42
  -1  -2  -5   17.53    4.08
  -1   2  -5   19.12    4.52
  -1  -2  -5   25.11    4.15
  -1   2  -6  228.71   15.16
  -1   2  -6  183.69   15.04
  -1  -2  -6  205.39   13.83
   1  -2   6  179.87   14.74
  -1  -2  -6  153.19   13.49
  -1  -2  -6  137.61   15.96
  -1   2  -7  859.23   48.80
  -1   2  -7  843.74   50.45
  -1  -2  -7  876.98   52.93
   1  -2   7  718.66   49.21
  -1   2  -8   15.28    5.13
  -1  -2  -8   10.97    4.97
   1  -2   8    7.95    3.63
  -1   2  -8   17.41    4.46
   1  -2   9  202.59   18.27
  -1  -2  -9  205.52   13.23
  -1  -2  -9  178.89   12.78
  -1   2  -9  209.11   12.99
  -1  -2  -9  197.74   13.16
  -1   2  -9  225.55   13.20
  -1   2  -9  221.25   13.39
  -1   2  -9  192.65   12.89
  -1   2  -9  202.13   16.30
  -1   2 -10  286.81   17.17
  -1   2 -10  269.78   16.61
  -1  -2 -10  286.57   16.94
  -1   2 -10  248.42   16.58
  -1   2 -10  273.48   16.76
  -1  -2 -10  269.59   16.80
  -1   2 -11    1.26    1.88
  -1  -2 -11    1.29    2.03
  -1   2 -11    1.88    1.67
  -1  -2 -11    2.39    1.94
  -1   2 -11    4.96    2.06
  -1   2 -11    3.05    2.27
  -1  -2 -12   20.36    3.12
  -1  -2 -12   21.73    3.20
  -1   2 -12   22.37    3.15
  -1   2 -12   19.89    3.07
  -1   2 -12   21.46    3.24
  -1   2 -13  186.84   11.03
  -1  -2 -13  159.40   10.70
  -1   2 -13  174.26   10.96
  -1  -2 -13  161.72   11.01
  -1   2 -13  168.19   10.90
  -1   2 -14  167.19    9.67
  -1   2 -14  143.77    9.47
  -1   2 -14  148.06    9.53
   1  -3 -15    6.15    1.62
   1   3 -15    7.99    1.55
   1   3 -15    9.20    1.69
   1   3 -14  154.75    9.53
   1   3 -14  134.85    9.46
   1  -3 -14  154.00    9.63
   1  -3 -13   37.94    4.09
   1   3 -13   32.50    3.82
   1   3 -13   34.76    3.90
   1   3 -12   59.80    5.43
   1   3 -12   55.61    5.34
   1  -3 -12   67.31    5.80
   1   3 -11    1.28    1.81
   1   3 -11    4.06    2.13
   1  -3 -11    2.26    2.07
   1   3 -10  674.30   39.00
   1   3 -10  675.98   38.87
   1  -3 -10  716.69   39.10
   1  -3 -10  690.94   39.24
   1  -3 -10  701.98   39.18
  -1   3   9    9.08    3.60
   1  -3  -9    4.33    2.42
   1   3  -9    3.16    3.37
   1  -3  -9    3.40    2.16
   1   3  -9    5.37    2.19
   1  -3  -9    3.50    3.15
   1   3  -9    4.95    1.94
   1  -3  -9    6.08    2.15
   1  -3  -8  406.04   26.53
   1   3  -8  380.41   25.86
  -1   3   8  385.07   25.98
   1   3  -7  315.85   21.77
   1  -3  -7  354.13   22.48
   1  -3  -7  301.25   21.74
  -1   3   7  330.62   21.80
   1  -3  -6  604.03   39.19
   1  -3  -6  687.16   39.33
  -1   3   6  710.12   39.17
  -1   3   6  648.32   38.95
  -1  -3   5  225.09   15.87
   1  -3  -5  191.29   14.06
  -1   3   5  198.30   13.93
   1  -3  -5  188.23   13.59
  -1   3   5  193.41   13.39
  -1  -3   4  246.86   16.97
  -1   3   4  232.76   15.75
  -1  -3   4  222.37   14.84
   1  -3  -4  232.87   15.64
  -1   3   4  244.74   14.63
   1  -3  -4  245.34   15.33
  -1  -3   3  340.51   23.73
   1  -3  -3  387.16   23.11
  -1   3   3  396.06   23.68
  -1   3   3  399.13   22.11
  -1  -3   3  390.30   22.59
   1   3  -3  403.79   22.14
   1  -3  -3  386.16   22.61
   1  -3  -3  396.87   22.39
  -1   3   3  367.77   22.43
   1  -3  -2  385.08   22.77
  -1   3   2  405.26   22.52
  -1   3   2  377.86   22.68
   1  -3  -2  421.12   22.52
  -1   3   2  387.53   23.86
   1  -3  -2  398.68   22.69
  -1  -3   2  405.71   23.00
  -1   3   2  408.78   22.38
   1  -3  -2  390.93   23.08
  -1   3   1  705.05   38.12
   1  -3  -1  677.91   36.83
  -1   3   1  633.34   36.59
   1  -3  -1  666.16   36.63
  -1   3   1  649.70   36.96
  -1  -3   1  719.46   37.21
   1   3  -1  670.44   36.54
  -1   3   0  947.72   52.77
  -1   3   0  938.18   52.70
   1   3   0  955.24   52.67
  -1   3   0  990.17   52.76
   1  -3   0  996.24   52.98
  -1  -3   0  951.08   52.66
   1  -3   0 1038.92   53.14
  -1   3   0 1057.84   53.92
  -1  -3  -1   46.88    3.71
  -1  -3  -1   54.76    4.11
   1  -3   1   45.36    4.35
  -1   3  -1   54.51    4.10
  -1   3  -1   45.80    3.95
  -1  -3  -2 4263.04  228.14
  -1   3  -2 4570.23  230.94
   1   3   2 4389.78  228.11
  -1   3  -2 4205.47  228.12
  -1  -3  -2 4305.70  228.51
   1  -3   2 4425.01  228.59
  -1   3  -2 4212.62  228.13
  -1  -3  -2 4233.78  228.13
  -1  -3  -2 4290.64  228.52
   1   3   3  880.59   49.41
  -1  -3  -3  941.87   50.79
   1   3   3  857.29   49.87
  -1  -3  -3  879.38   49.38
  -1   3  -3  909.20   49.61
  -1  -3  -3  904.35   49.60
  -1  -3  -3  867.67   50.70
  -1   3  -3  896.62   49.44
  -1   3  -3 1043.55   52.51
   1  -3   3  895.03   49.93
  -1  -3  -4  219.08   13.99
   1  -3   4  209.48   14.03
  -1   3  -4  250.31   16.03
  -1  -3  -4  174.22   15.58
  -1   3  -4  207.25   13.49
  -1  -3  -4  220.04   13.70
  -1   3  -4  188.59   13.47
  -1   3  -5   99.02    7.91
  -1   3  -5  108.84    9.65
  -1  -3  -5  101.08    8.51
   1  -3   5   87.84    8.22
  -1  -3  -6 1486.85   77.15
   1  -3   6 1346.98   76.73
  -1   3  -6 1624.87   78.28
  -1  -3  -6 1103.65   80.06
   1  -3   6 1214.32   78.08
  -1  -3  -7   37.50    5.94
   1  -3   7   39.39    6.76
   1  -3   7   35.18    5.60
  -1   3  -7   42.03    6.26
  -1   3  -8   33.30    5.86
  -1   3  -8   41.61    3.97
  -1   3  -8   36.63    3.90
  -1  -3  -8   32.41    3.76
  -1   3  -9    7.17    3.77
   1  -3   9    4.71    4.23
  -1  -3  -9    5.72    2.25
  -1   3  -9    5.50    2.18
  -1   3  -9    5.58    2.09
  -1   3  -9    1.47    1.66
  -1  -3  -9    6.41    2.30
  -1   3  -9    5.22    2.15
  -1   3 -10   63.64    5.53
  -1  -3 -10   55.16    5.38
  -1   3 -10   56.18    5.25
  -1   3 -10   51.14    5.02
  -1   3 -10   56.78    5.26
  -1   3 -11  345.90   20.01
  -1  -3 -11  360.82   20.40
  -1   3 -11  294.22   19.81
  -1   3 -11  356.39   20.33
  -1   3 -11  323.43   20.09
  -1   3 -12    0.57    1.64
  -1  -3 -12    1.21    1.95
  -1   3 -12   -0.27    1.80
  -1   3 -13   75.24    6.04
  -1   3 -13   84.25    6.08
  -1   3 -14   13.07    2.11
  -1   3 -14   12.95    2.04
   1  -4 -14    5.12    1.84
   1   4 -14    4.90    1.87
  -1  -4  14    6.20    1.85
   1   4 -14    4.52    1.66
   1   4 -13   29.47    3.46
   1  -4 -13   36.31    3.77
  -1  -4  13   33.71    3.93
   1   4 -13   29.08    3.70
   1   4 -12   54.67    5.11
   1   4 -12   54.08    5.42
   1  -4 -12   66.44    5.66
   1   4 -11   12.05    2.89
   1  -4 -11   16.79    3.22
   1   4 -11    9.87    2.55
   1   4 -10    9.25    2.43
   1   4 -10    6.03    2.25
   1  -4 -10    5.13    2.33
   1   4  -9   36.30    4.14
   1  -4  -9   43.19    4.48
   1   4  -9   41.65    4.33
  -1   4   9   41.26    6.93
   1   4  -9   28.40    6.00
   1  -4  -8  473.93   26.68
   1  -4  -8  425.87   29.91
   1   4  -8  442.60   26.26
  -1   4   8  422.00   29.99
   1   4  -8  501.61   30.48
  -1   4   8  465.74   29.71
  -1   4   7  154.82   12.64
   1  -4  -7  165.32   13.88
   1  -4  -7  152.08   13.07
   1   4  -7  150.79   12.93
   1  -4  -6 1084.28   63.08
  -1   4   6 1072.41   61.84
   1  -4  -6 1083.75   62.30
  -1   4   6 1137.75   62.56
   1  -4  -5  224.08   16.25
   1  -4  -5  235.07   15.63
  -1   4   5  225.33   15.26
  -1   4   5  220.68   15.92
   1  -4  -4  448.71   25.28
   1  -4  -4  413.48   25.74
  -1   4   4  420.15   24.93
  -1   4   4  386.12   25.73
  -1   4   3  362.61   21.97
  -1  -4   3  360.71   22.17
  -1   4   3  365.96   23.11
   1  -4  -3  373.06   21.74
   1  -4  -3  393.67   22.26
  -1   4   2 4474.39  236.35
  -1  -4   2 4489.74  237.10
  -1   4   2 4505.99  237.91
   1  -4  -2 4449.20  236.16
   1  -4  -2 4472.54  236.78
   1  -4  -2 4360.48  236.44
  -1   4   1  881.68   48.12
  -1   4   1  847.03   47.84
   1  -4  -1  868.82   47.87
   1  -4  -1  902.82   48.21
  -1   4   1  891.60   48.47
  -1   4   1  883.85   49.35
   1   4  -1  880.16   47.99
  -1   4   0  830.97   44.92
  -1   4   0  798.09   45.06
   1  -4   0  831.05   45.19
  -1   4   0  807.19   44.89
  -1   4   0  820.67   46.13
   1   4   0  809.32   45.01
   1  -4   0  865.45   45.39
  -1  -4  -1  279.11   16.62
  -1   4  -1  301.98   16.55
  -1  -4  -1  287.82   17.17
  -1   4  -1  271.16   16.25
  -1   4  -1  277.73   16.59
   1   4   1  259.77   16.47
   1  -4   1  281.43   16.87
   1  -4   2  366.50   21.75
   1   4   2  338.14   21.22
  -1  -4  -2  371.07   21.40
  -1   4  -2  391.36   21.40
  -1  -4  -2  361.17   21.96
  -1   4  -2  367.24   21.31
  -1   4  -3    8.09    4.04
  -1  -4  -3    4.67    3.12
  -1  -4  -3    2.30    3.02
   1   4   3    4.65    2.84
  -1  -4  -3    4.11    2.19
  -1   4  -3    5.25    2.12
   1  -4   3    2.90    2.24
   1   4   3    5.10    2.13
  -1   4  -3    4.48    2.21
  -1  -4  -4  141.45   10.59
  -1   4  -4  138.38   10.48
  -1   4  -4  153.37   10.51
   1  -4   4  130.15   10.88
   1   4   4  146.54   10.52
  -1   4  -4  175.14   12.60
  -1   4  -5   18.14    4.78
  -1  -4  -5   19.19    4.09
   1  -4   5   16.65    3.86
  -1   4  -5   18.35    3.41
   1   4   5   21.34    3.73
  -1  -4  -6 1165.05   62.38
   1  -4   6 1077.39   62.22
  -1   4  -6 1160.45   62.84
   1  -4   7  144.10   12.86
   1  -4   7  125.46   13.45
   1  -4   8   29.20    6.37
  -1   4  -8   30.26    3.84
  -1   4  -8   26.83    5.43
  -1  -4  -8   34.62    3.93
  -1   4  -9    9.00    2.26
  -1   4  -9   12.90    2.66
  -1  -4  -9   10.12    2.65
  -1   4 -10  337.43   19.50
  -1   4 -10  286.78   19.00
  -1  -4 -10  325.27   19.32
  -1  -4 -11   16.57    3.34
  -1   4 -11   22.87    3.33
  -1   4 -11   14.99    2.93
  -1   4 -12  298.80   17.87
  -1   4 -12  290.39   17.82
  -1   4 -13   63.91    5.21
  -1   4 -14   33.69    3.13
  -1  -5  14   14.38    2.21
   1  -5 -14   12.51    2.13
   1   5 -13  218.01   13.25
   1  -5 -13  210.62   13.27
   1   5 -12  488.73   29.32
   1  -5 -12  528.72   29.29
   1   5 -11  229.27   14.07
   1  -5 -11  199.60   13.70
   1   5 -10  241.24   15.54
   1  -5 -10  247.23   15.52
   1  -5  -9  133.18    9.08
   1   5  -9  115.42    8.78
   1   5  -9  117.11    8.86
   1  -5  -8    5.10    2.37
  -1   5   8   -0.79    2.92
   1   5  -8    7.31    2.07
   1  -5  -8   -0.88    3.37
   1   5  -8    7.74    4.15
   1   5  -8    4.36    2.18
  -1   5   7    0.74    2.84
   1   5  -7    3.04    3.38
   1  -5  -7    0.77    3.33
  -1   5   7    1.37    2.84
   1  -5  -6  721.26   41.90
  -1   5   6  693.64   41.27
  -1   5   6  670.30   41.77
  -1   5   5    4.47    2.70
   1  -5  -5    4.24    2.84
  -1   5   5    5.55    3.24
   1  -5  -4  630.34   35.95
  -1   5   4  605.41   35.70
  -1   5   4  603.66   36.77
  -1   5   3  486.43   29.71
   1  -5  -3  503.03   28.73
  -1  -5   3  464.22   28.21
   1  -5  -3  488.40   28.13
  -1   5   3  488.47   28.05
  -1   5   3  479.98   28.50
  -1   5   2  389.34   23.11
   1  -5  -2  415.58   23.45
  -1   5   2  402.07   24.89
  -1   5   2  383.79   23.52
   1  -5  -2  404.91   23.78
  -1   5   1   25.41    3.54
  -1   5   1   15.47    2.51
  -1   5   1   14.18    3.95
   1   5  -1   18.82    3.06
   1  -5  -1   19.13    3.09
  -1   5   0    3.93    2.38
  -1   5   0   11.58    3.52
  -1   5   0    9.66    2.15
  -1   5   0    7.98    1.96
   1  -5   0    8.36    2.25
   1  -5   0    9.51    2.41
   1   5   0    8.68    2.64
   1   5   1  110.22    8.09
  -1  -5  -1  102.85    7.96
  -1  -5  -1  104.48    8.65
  -1   5  -1  108.73    7.52
   1  -5   1  108.95    8.27
  -1   5  -1  105.29    7.90
  -1   5  -1  113.72    7.76
  -1   5  -2 3063.56  160.52
  -1  -5  -2 3037.54  161.42
   1  -5   2 2873.95  160.90
  -1  -5  -2 3011.19  160.65
  -1   5  -2 3002.28  160.37
  -1  -5  -3  260.20   16.61
  -1   5  -3  223.39   15.19
   1  -5   3  261.71   16.16
  -1   5  -3  222.75   15.11
   1   5   3  252.25   16.52
   1   5   3  237.81   15.42
  -1  -5  -3  230.61   15.40
   1   5   4   11.45    3.10
  -1  -5  -4   13.65    3.35
  -1   5  -4    7.75    2.59
   1  -5   4    8.75    3.36
   1   5   4   11.73    3.68
  -1   5  -4   16.13    3.15
  -1  -5  -5  127.41   10.66
   1  -5   5  126.88   10.97
  -1   5  -5  127.17   10.15
   1  -5   6  324.23   22.03
  -1   5  -6  368.38   22.60
  -1   5  -7  567.14   31.10
  -1   5  -7  580.00   34.70
   1  -5   7  485.84   34.25
   1  -5   7  489.96   35.86
  -1   5  -8  565.66   31.76
  -1   5  -8  534.25   35.21
   1  -5   8  528.69   37.65
  -1   5  -9  315.40   18.90
  -1  -5  -9  320.14   18.84
  -1   5  -9  282.43   18.47
  -1   5 -10    8.46    2.71
  -1   5 -10   12.24    2.66
  -1   5 -11  365.65   21.59
  -1   5 -11  351.08   21.36
  -1   5 -12   69.00    5.83
  -1   5 -12   75.53    5.99
  -1   5 -13   33.27    3.27
  -1   5 -13   24.64    3.04
  -1   5 -14    3.26    1.36
  -1  -6  14    3.09    1.46
   1  -6 -13    2.55    1.85
  -1  -6  13    3.66    1.91
   1  -6 -12  202.27   12.89
   1  -6 -11  446.43   27.39
   1   6 -11  507.69   27.85
   1   6 -10   34.40    4.26
   1  -6 -10   38.59    4.61
   1   6 -10   40.49    4.45
   1   6  -9  194.55   14.02
   1   6  -9  234.89   14.41
   1  -6  -9  239.14   14.44
   1  -6  -8  766.66   41.74
   1   6  -8  745.93   46.51
   1   6  -8  780.16   41.87
   1   6  -8  694.70   41.66
  -1   6   8  724.83   45.70
  -1   6   7  649.68   42.73
  -1  -6   7  597.47   42.01
   1   6  -7  747.21   39.04
  -1   6   7  756.80   42.99
   1  -6  -7  643.83   42.67
   1   6  -7  656.57   42.86
   1  -6  -7  706.71   38.77
  -1  -6   6  282.10   19.97
   1  -6  -6  257.71   19.72
  -1   6   6  302.92   20.92
  -1   6   6  291.42   19.94
  -1   6   5  163.99   13.38
   1  -6  -5  146.10   12.15
  -1   6   5  146.99   11.92
  -1  -6   5  149.00   12.09
  -1  -6   4  298.90   20.07
  -1   6   4  320.16   21.60
   1  -6  -4  320.97   20.48
  -1   6   3   83.20    8.39
   1  -6  -3   73.27    7.30
  -1   6   2 1089.74   62.21
  -1   6   2 1106.80   60.82
   1  -6  -2 1081.69   61.06
   1  -6  -2 1090.54   60.44
  -1   6   1  109.66   10.42
  -1   6   1  136.86    9.80
   1  -6  -1  137.44    9.53
  -1   6   0  378.34   22.92
   1   6   0  386.93   22.95
  -1  -6   0  384.62   23.78
   1  -6   0  378.91   22.94
  -1  -6  -1   22.86    3.85
   1  -6   1   32.60    4.06
  -1  -6  -1   25.36    4.83
  -1   6  -1   34.81    4.20
   1   6   1   29.92    4.29
   1  -6   1   33.13    4.23
  -1   6  -2    1.10    1.92
  -1  -6  -2    2.44    2.42
  -1  -6  -2    2.63    3.71
   1   6   2    2.29    2.48
   1  -6   2    0.88    2.20
  -1   6  -3  944.74   50.78
  -1  -6  -3  902.03   50.95
  -1   6  -3  825.02   50.39
   1  -6   3  900.64   51.37
   1   6   3  930.10   52.14
  -1   6  -4  258.01   17.68
  -1   6  -4  261.21   17.58
  -1  -6  -4  285.64   18.31
   1  -6   4  282.80   18.81
   1   6   4  248.54   18.73
   1  -6   5    4.89    3.32
  -1   6  -5    7.71    2.95
  -1   6  -6  196.60   14.98
   1  -6   6  196.54   16.09
   1  -6   7  291.80   23.50
  -1   6  -7  347.00   20.11
  -1   6  -8   23.20    3.55
  -1   6  -9   32.10    3.98
  -1   6  -9   39.44    4.49
  -1   6 -10   25.70    3.77
  -1   6 -10   37.60    4.08
  -1   6 -11  100.45    7.77
  -1   6 -11  100.24    7.61
  -1   6 -12  544.79   31.28
  -1   6 -12  561.66   31.26
  -1   6 -13  166.74   10.05
  -1   6 -13  153.20    9.85
  -1  -7  14   43.48    3.49
  -1  -7  13  166.37   10.49
   1  -7 -12  464.70   26.42
   1   7 -11    6.89    2.33
   1  -7 -10    1.63    2.14
   1   7 -10   -0.34    2.34
   1   7 -10    1.34    1.99
   1  -7  -9   30.45    4.06
   1   7  -9   31.65    4.02
   1   7  -8   26.70    3.76
   1  -7  -8   33.16    4.10
   1   7  -7  556.98   31.45
  -1   7   7  514.74   35.17
   1   7  -7  504.03   35.61
   1  -7  -7  565.88   31.34
  -1   7   6   88.82    9.97
   1  -7  -6   82.74    9.30
  -1  -7   6   67.67    8.34
   1  -7  -5   13.80    4.07
  -1   7   5   15.46    4.53
   1  -7  -4   61.47    6.99
  -1   7   4   55.79    7.64
  -1   7   4   47.25    6.25
  -1   7   3  404.25   25.31
   1  -7  -3  393.68   25.51
  -1   7   3  412.82   26.78
   1  -7  -2   -0.51    2.32
  -1   7   2   -0.47    2.89
  -1   7   2    2.65    2.94
  -1  -7   1  483.61   28.98
  -1   7   1  440.23   29.10
  -1   7   1  459.49   27.91
   1  -7  -1  467.76   27.64
   1  -7  -1  456.46   28.39
  -1   7   0  127.97    9.61
   1  -7   0  114.98    9.23
  -1  -7   0  105.06   10.15
   1   7   0  113.41    9.32
  -1  -7  -1   85.25    7.76
   1   7   1   75.20    7.38
   1  -7   1   76.67    7.26
  -1  -7  -1   80.33    8.50
  -1   7  -1   72.64    6.94
  -1  -7  -2   89.55    9.39
  -1  -7  -2   94.35    8.56
  -1   7  -2   89.73    7.97
   1   7   2   95.25    8.40
   1  -7   2   86.55    8.21
  -1  -7  -3   26.87    4.56
   1   7   3   25.80    5.21
  -1   7  -3   24.00    4.02
   1  -7   3   22.96    4.29
   1  -7   4  652.86   40.69
   1   7   4  683.34   41.39
  -1   7  -4  676.78   39.68
  -1   7  -5   24.15    4.58
  -1   7  -5   27.63    3.27
   1  -7   5   22.21    5.06
  -1  -7  -6   12.95    4.35
  -1   7  -6   12.50    2.52
  -1   7  -6    9.81    3.30
   1  -7   6    9.94    4.23
  -1  -7  -7  500.98   30.17
  -1   7  -7  496.70   28.93
  -1   7  -8  835.59   46.26
  -1  -7  -8  808.62   46.82
  -1   7  -9   37.44    4.49
  -1   7 -10  103.12    7.88
  -1   7 -10  104.64    8.06
  -1   7 -11  482.40   28.52
  -1   7 -11  510.78   28.55
  -1   7 -12   91.36    6.78
  -1   7 -12   96.96    6.70
  -1   7 -13    1.39    1.29
  -1  -8  13   17.27    2.34
  -1  -8  13   19.90    2.46
   1  -8 -12   39.51    3.93
   1   8 -11  577.71   33.79
   1  -8 -11  624.88   33.96
   1   8 -10  145.75   10.24
   1   8  -9    1.41    2.11
   1   8  -8  506.96   29.57
   1   8  -7  115.49    8.71
  -1   8   6  233.35   18.42
   1  -8  -5   58.52    7.78
   1   8  -5   53.70    4.67
   1  -8  -5   53.80    6.18
  -1   8   5   51.66    7.41
  -1   8   5   65.52    8.79
   1  -8  -4  316.06   23.35
  -1   8   4  367.09   23.68
  -1   8   4  371.31   25.21
   1  -8  -3  664.57   39.75
  -1   8   3  666.14   39.51
  -1   8   3  633.47   40.80
   1  -8  -2   62.77    7.48
  -1   8   2   73.62    7.66
  -1   8   2   64.37    8.43
  -1  -8   2   69.27    8.30
   1  -8  -1    2.96    3.11
  -1   8   1    3.75    2.77
  -1  -8   1    4.91    3.96
   1   8   0   95.84    9.02
  -1   8   0  102.86    9.23
  -1  -8   0   94.81    9.60
  -1  -8  -1  505.37   33.60
   1  -8   1  549.39   32.36
  -1  -8  -1  523.08   32.61
  -1   8  -1  543.07   32.03
  -1  -8  -2   38.22    5.52
  -1   8  -2   23.09    4.35
   1   8   2   24.66    5.43
  -1  -8  -2   29.31    6.08
   1  -8   2   22.99    4.39
  -1   8  -3  749.38   43.56
   1  -8   3  733.09   44.26
   1   8   3  740.37   45.49
  -1   8  -4  152.32   10.22
  -1   8  -4  149.69   12.90
  -1  -8  -4  185.93   11.96
  -1   8  -4  169.55   10.65
   1  -8   4  169.02   14.19
   1   8   4  190.98   15.53
  -1   8  -5    3.45    2.64
  -1  -8  -5    1.71    3.33
  -1   8  -5    1.48    1.60
  -1  -8  -5    2.81    3.11
  -1   8  -5    0.51    1.83
   1  -8   5    3.51    3.73
  -1   8  -6  105.20    7.39
  -1   8  -6   95.90    6.90
  -1  -8  -6   87.56    9.01
  -1  -8  -6   90.11    7.57
  -1  -8  -7  528.49   31.87
  -1   8  -8   35.90    4.21
  -1  -8  -8   23.90    4.92
  -1   8  -9   12.16    2.69
  -1   8  -9   13.07    2.57
  -1  -8  -9    6.79    3.35
  -1   8 -10   13.33    2.65
  -1   8 -10    8.64    2.41
  -1   8 -11    4.48    2.05
  -1   8 -11    2.24    1.68
  -1   8 -12  223.55   13.45
  -1   8 -12  230.32   13.59
   1  -9 -12   55.40    4.63
  -1  -9  12   63.49    4.89
  -1  -9  11   48.61    4.92
   1  -9 -11   50.57    4.82
   1   9 -10  124.85    8.65
   1  -9 -10  110.82    8.81
   1   9  -9    1.03    2.20
   1  -9  -9    0.37    2.86
   1  -9  -8   39.60    5.37
   1   9  -8   26.01    4.01
   1   9  -7 1085.89   60.19
   1  -9  -6    2.26    3.28
   1   9  -5   15.74    2.66
   1  -9  -5   15.16    4.17
  -1   9   4   10.46    2.55
  -1   9   4   21.83    5.09
   1   9  -4   11.91    2.44
   1   9  -4   17.01    2.81
   1  -9  -4   17.57    4.51
  -1   9   3  811.56   43.78
   1  -9  -3  739.85   43.70
  -1   9   3  668.18   44.50
  -1   9   3  685.28   39.02
   1  -9  -3  719.45   40.66
   1   9  -3  709.48   39.25
  -1   9   2   78.15    9.61
  -1  -9   2   67.72    6.07
  -1   9   2   83.78    8.77
   1   9  -2   81.15    5.91
   1  -9  -2   82.77    8.93
  -1   9   2   79.49    5.77
   1  -9  -2   78.39    6.94
   1  -9  -1  803.79   44.34
   1  -9  -1  762.22   40.29
  -1   9   1  853.84   43.86
   1   9  -1  709.73   39.58
  -1  -9   1  729.56   44.82
  -1   9   1  724.16   39.52
  -1   9   1  650.79   39.40
  -1  -9   0   14.90    5.57
  -1   9   0   23.97    2.78
   1  -9   0   22.26    4.75
  -1  -9   0   16.67    4.52
  -1   9   0   22.51    2.85
  -1   9  -1  213.35   14.02
  -1   9  -1  265.64   14.36
  -1  -9  -1  268.95   19.82
   1   9   1  223.52   18.75
   1   9   2  192.64   17.40
  -1   9  -2  218.94   13.27
  -1  -9  -2  228.65   13.88
  -1   9  -2  221.50   13.31
  -1   9  -2  223.22   18.44
  -1  -9  -3  708.27   39.30
  -1   9  -3  739.51   38.56
   1  -9   3  649.96   42.26
  -1   9  -3  683.78   38.40
   1   9   3  619.82   43.40
  -1   9  -4  126.61    8.65
  -1   9  -4  119.45    8.75
  -1  -9  -5  374.52   21.89
  -1   9  -5  337.40   20.14
  -1  -9  -5  329.29   20.33
  -1   9  -5  334.33   19.79
  -1   9  -6  108.63    7.87
  -1  -9  -6  124.78    8.81
  -1  -9  -6  109.03    9.97
  -1  -9  -7   62.10    7.32
  -1  -9  -8  163.29   12.19
  -1  -9  -9   19.75    3.86
  -1   9  -9   20.79    3.16
  -1   9 -10  101.50    7.06
  -1   9 -10   83.72    6.76
  -1   9 -11  272.82   16.23
  -1   9 -11  280.06   16.32
  -1   9 -12   14.69    1.99
  -1   9 -12   17.10    1.98
   1 -10 -12    0.14    1.40
  -1 -10  12    1.01    1.43
  -1 -10  11  157.44    9.61
   1 -10 -11  135.37    9.36
   1 -10 -10    4.08    2.53
  -1 -10  10    2.61    2.68
   1  10 -10    2.13    1.80
   1 -10  -9   43.02    4.99
   1  10  -9   38.28    4.36
  -1 -10   9   37.44    5.13
  -1 -10   8   -0.81    3.26
  -1 -10   8   -0.72    2.74
   1  10  -8    2.10    2.21
   1 -10  -8    3.06    3.31
  -1 -10   7    5.35    3.38
   1  10  -7    5.84    2.47
   1 -10  -7    4.39    3.19
  -1 -10   7    3.15    3.43
   1 -10  -6  140.38   10.71
  -1 -10   6  146.75   11.79
   1  10  -5  494.89   28.37
  -1 -10   5  509.93   30.59
   1  10  -4    7.71    2.29
  -1 -10   4   10.01    3.89
   1  10  -4   12.48    2.72
   1 -10  -4    7.77    3.95
  -1  10   4    6.74    2.42
  -1  10   3 1041.07   55.96
  -1 -10   3  998.58   57.03
   1  10  -3 1031.67   56.16
   1  10  -2  358.78   20.68
  -1  10   2  348.09   20.49
  -1  10   2  372.52   20.58
  -1 -10   2  338.40   20.96
  -1  10   1  238.81   13.70
  -1  10   1  235.48   17.68
   1  10  -1  210.48   13.67
  -1  10   1  222.34   13.60
   1  10   0   15.06    2.81
  -1  10   0   16.19    2.56
  -1  10   0   12.91    2.68
  -1  10  -1  864.28   47.70
  -1  10  -1  878.48   47.79
  -1  10  -2   52.74    4.84
  -1  10  -2   60.68    5.02
  -1  10  -3  308.31   18.84
  -1 -10  -3  311.49   19.63
  -1  10  -3  344.47   19.00
  -1  10  -4    0.24    1.76
  -1 -10  -4    0.39    3.11
  -1  10  -5   27.58    3.55
  -1 -10  -5   29.86    4.93
  -1  10  -5   30.27    3.72
  -1 -10  -5   28.04    4.56
  -1 -10  -6   64.89    6.43
  -1 -10  -6   56.39    7.26
  -1  10  -6   79.54    5.87
  -1 -10  -7  615.98   33.22
  -1 -10  -7  539.67   34.34
  -1 -10  -8    5.10    3.68
  -1  10  -9    0.80    1.60
  -1 -10  -9   -1.52    2.54
  -1  10 -10   33.11    3.47
  -1 -10 -10   36.45    3.74
   1 -11 -11   27.38    2.91
  -1 -11  11   29.50    2.94
  -1 -11  10   27.01    3.44
   1 -11 -10   28.17    3.49
  -1 -11   9   11.51    3.14
   1 -11  -9   19.48    2.98
   1  11  -9   12.29    2.54
  -1 -11   8    5.71    2.63
   1  11  -8    6.38    2.29
  -1 -11   8    4.07    2.98
   1 -11  -8    3.72    3.07
   1 -11  -7  470.77   29.42
   1  11  -7  484.95   29.37
  -1 -11   6  171.76   12.94
  -1 -11   5    8.95    4.02
  -1 -11   4   37.48    5.47
   1  11  -4   29.35    3.77
   1  11  -3  151.14   10.09
  -1  11   3  153.82    9.98
  -1 -11   3  144.28   10.91
  -1  11   2   49.21    4.40
  -1 -11   2   36.07    4.37
  -1  11   2   36.94    4.00
   1  11  -2   38.30    4.26
  -1  11   1  475.07   25.93
  -1  11   1  462.17   25.71
   1  11  -1  417.54   25.63
  -1  11   0    0.94    1.90
  -1  11   0    3.53    2.23
   1  11   0    3.20    2.16
  -1  11  -1  222.95   13.62
  -1  11  -1  214.79   13.46
  -1  11  -2  281.38   17.39
  -1  11  -2  307.41   17.63
  -1  11  -3  444.58   24.90
  -1  11  -3  411.51   24.73
  -1 -11  -3  447.43   25.67
  -1  11  -4   59.78    5.17
  -1  11  -4   55.06    5.08
  -1 -11  -4   55.46    6.46
  -1 -11  -4   56.53    6.02
  -1 -11  -5  279.52   17.38
  -1  11  -5  292.93   16.86
  -1 -11  -5  256.99   18.02
  -1 -11  -6   61.44    6.01
  -1 -11  -6   53.74    6.69
  -1 -11  -7    4.49    3.21
  -1 -11  -7    1.63    3.52
  -1 -11  -8  144.40   10.40
   1 -11   9   76.39    5.53
  -1 -11  -9   66.42    5.83
  -1 -11 -10   29.00    3.21
  -1 -11 -10   34.55    3.25
   1 -12 -10   42.13    3.68
  -1 -12   9   36.67    3.62
   1 -12  -9   36.74    3.97
  -1 -12   8  490.80   25.79
   1  12  -8  415.46   25.53
   1 -12  -8  436.31   25.69
   1  12  -7    4.94    2.38
  -1 -12   7    7.08    2.88
  -1 -12   6   44.48    5.63
  -1 -12   5   89.40    8.40
  -1 -12   4  175.69   12.71
   1  12  -3  208.66   13.26
  -1 -12   3  212.55   14.03
  -1  12   2  245.09   14.39
  -1  12   2  233.48   14.56
   1  12  -2  225.00   14.44
   1  12  -1   84.30    6.71
  -1  12   1   95.77    6.91
  -1  12   1   78.11    6.48
  -1  12   0   48.61    4.67
   1  12   0   42.72    4.73
  -1  12  -1  215.69   12.97
  -1  12  -1  198.76   13.00
  -1  12  -2    7.49    2.33
  -1  12  -2    2.30    2.28
  -1  12  -3   24.51    3.40
  -1  12  -3   21.89    3.25
  -1 -12  -3   20.15    5.13
  -1  12  -4   73.65    5.97
  -1 -12  -4   71.72    6.89
  -1 -12  -4   76.74    7.38
  -1 -12  -5    3.83    3.14
  -1  12  -5    0.72    2.02
  -1 -12  -5    4.58    3.69
  -1 -12  -6  201.74   11.99
  -1 -12  -6  154.32   12.35
   1 -12   7   58.85    5.00
  -1 -12  -7   48.36    4.99
  -1 -12  -7   44.62    5.40
  -1 -12  -8   10.46    2.96
   1 -12   8   10.44    2.30
   1 -12   9    0.76    1.41
  -1 -12  -9    0.96    1.87
  -1 -12  -9    0.40    1.56
  -1 -13   8    9.03    2.09
   1  13  -8   11.96    2.12
  -1  13   7    1.94    1.81
  -1 -13   7    1.01    2.11
   1  13  -7    1.73    1.72
  -1 -13   6  108.52    8.06
   1 -13  -6   98.80    7.49
  -1  13   6   97.47    7.06
   1  13  -6   96.74    7.39
  -1  13   5    1.16    2.07
  -1 -13   5    3.17    2.94
  -1 -13   4   68.74    6.61
  -1  13   4   69.58    5.77
  -1 -13   3    7.91    2.96
  -1  13   3    2.75    2.25
   1  13  -2    1.24    2.28
  -1  13   2    5.54    2.49
  -1  13   1   21.12    3.29
   1  13  -1   15.32    2.96
  -1  13   1   18.61    3.00
   1  13   0   76.50    6.32
  -1  13   0   85.53    6.48
  -1  13   0   81.97    6.26
  -1  13  -1    0.70    1.90
  -1  13  -1    0.25    2.20
  -1  13  -2  285.61   17.11
  -1 -13  -2  320.76   19.31
  -1  13  -2  275.51   16.98
  -1  13  -3    5.08    2.21
  -1  13  -3    5.32    2.18
  -1 -13  -3    7.07    4.65
  -1 -13  -4  252.38   15.79
   1 -13   4  253.77   15.54
  -1  13  -4  239.80   14.81
  -1 -13  -5    2.87    2.88
  -1 -13  -5    3.75    3.27
   1 -13   5    1.43    2.35
  -1 -13  -6   -2.99    2.80
   1 -13   6    1.00    2.14
  -1 -13  -6    0.42    2.97
  -1 -13  -7   -0.50    2.33
   1 -13   7    0.61    1.80
  -1 -13  -8  482.23   27.81
   1 -13   8  514.14   27.58
   1  14  -7    1.22    1.41
  -1 -14   6    5.63    2.08
  -1  14   6    9.03    1.95
   1  14  -6    9.37    2.04
   1 -14  -6    6.12    2.62
  -1 -14   5   13.10    2.94
  -1  14   5   19.49    2.62
   1 -14  -5   21.56    3.62
   1  14  -5   15.41    2.67
  -1 -14   4  169.87   10.93
  -1  14   4  164.86   10.34
   1 -14  -4  155.65   10.93
  -1  14   3   41.09    4.04
  -1  14   2  137.47    9.11
   1  14  -1   20.85    3.12
  -1  14   1   25.86    3.25
   1  14   0   88.68    6.69
  -1  14   0   92.96    6.75
  -1  14   0   94.65    6.64
  -1  14  -1   36.47    3.76
  -1  14  -1   31.16    3.52
  -1  14  -2    4.51    2.13
  -1  14  -2    2.80    1.85
  -1 -14  -2    5.78    4.69
  -1  14  -3    5.38    1.99
  -1 -14  -3    1.46    4.03
  -1 -14  -4   71.32    6.39
  -1 -14  -5    4.72    2.91
   1 -14   5   -0.20    1.88
  -1 -14  -6  120.23    8.35
   1 -14   6  128.71    8.08
   1  15  -5    2.13    1.30
  -1  15   4   29.61    2.79
   1  15  -4   29.96    2.98
   1 -15  -3   13.97    3.54
  -1  15   3   27.24    2.78
  -1  15   2   12.64    2.19
   1 -15  -2    0.23    3.35
  -1  15   1  138.10    8.76
  -1  15   0   18.12    2.56
  -1  15  -1   24.21    2.62
  -1  15  -2   84.45    5.77
  -1 -15  -3   51.91    5.11
  -1 -15  -4   31.83    3.85
   2   0 -15    0.49    1.30
   2   0 -15    0.70    1.40
   2   0 -14   54.47    4.59
   2   0 -14   50.55    4.64
   2   0 -13    2.44    1.99
   2   0 -13   -1.45    2.03
   2   0 -12  369.44   21.87
   2   0 -12  363.26   21.69
   2   0 -11    0.30    2.02
   2   0 -11   -0.64    2.32
   2   0 -10  377.67   21.70
  -2   0  10  364.89   25.89
  -2   0  10  324.16   25.47
   2   0 -10  363.65   21.52
   2   0  -9   -0.81    1.88
  -2   0   9    0.81    2.50
  -2   0   9   -2.58    3.19
  -2   0   9    0.77    1.80
   2   0  -9    0.82    1.99
  -2   0   8 2004.80  113.35
  -2   0   8 2059.92  112.97
  -2   0   7    0.65    2.58
  -2   0   7    5.23    3.03
  -2   0   7    2.39    2.35
  -2   0   6  278.58   18.86
  -2   0   6  273.84   19.11
  -2   0   6  311.94   19.94
  -2   0   5   -0.38    2.08
  -2   0   5    0.53    2.54
  -2   0   5    1.27    2.00
  -2   0   4 3818.44  207.54
  -2   0   4 3883.60  207.22
  -2   0   4 4009.08  208.71
  -2   0   3    1.39    2.41
  -2   0   3   -1.21    1.50
  -2   0   2  814.09   44.78
  -2   0   2  830.24   45.38
  -2   0   1    0.20    2.03
   2   0  -1    0.14    1.31
  -2   0   1    0.59    1.11
  -2   0   1   -0.33    1.22
   2   0  -1   -0.17    1.58
  -2   0   1    0.18    1.61
   2   0   0  289.62   16.35
  -2   0   0  331.34   17.23
  -2   0   0  286.62   16.51
   2   0   0  263.19   15.95
  -2   0   0  293.87   16.62
  -2   0  -1    1.15    1.18
  -2   0  -1   -0.19    1.47
  -2   0  -1    0.21    2.05
   2   0   1   -0.15    1.29
  -2   0  -1    0.19    1.76
  -2   0  -1    0.18    1.76
  -2   0  -2  192.77   11.68
  -2   0  -2  155.89   10.87
  -2   0  -2  193.88   11.67
  -2   0  -2  203.56   11.98
  -2   0  -2  183.44   11.86
  -2   0  -2  190.10   11.73
  -2   0  -2  188.31   11.82
  -2   0  -3   -0.85    2.19
  -2   0  -3    0.35    2.19
  -2   0  -3    1.13    2.65
  -2   0  -3    2.41    2.82
  -2   0  -3    0.23    1.64
  -2   0  -4 2874.40  148.45
  -2   0  -4 2637.85  146.10
  -2   0  -5    1.52    4.12
  -2   0  -6  101.01   11.26
  -2   0  -7    1.83    4.56
  -2   0  -8 1323.54   72.71
  -2   0  -8 1533.55   78.03
  -2   0  -8 1368.20   72.77
  -2   0  -8 1246.60   71.61
  -2   0  -8 1440.47   73.48
  -2   0  -8 1232.80   72.04
  -2   0  -9    0.36    2.47
  -2   0  -9    0.70    2.36
  -2   0  -9    0.90    1.69
  -2   0 -10  241.00   14.87
  -2   0 -10  228.15   14.52
  -2   0 -10  216.29   14.71
  -2   0 -11    0.62    2.08
  -2   0 -11   -0.34    2.24
  -2   0 -11   -0.31    1.79
  -2   0 -12  126.12    8.64
  -2   0 -12  116.28    8.43
  -2   0 -13    0.85    1.50
  -2   0 -13    0.47    1.67
  -2   0 -14    4.55    1.52
   2  -1 -15   91.97    6.42
   2   1 -15   96.93    6.45
   2   1 -15   95.85    6.38
   2   1 -14   88.50    7.02
   2   1 -14  102.90    7.14
   2  -1 -14  111.39    7.40
   2  -1 -13    8.83    2.42
   2   1 -13    6.85    2.49
   2  -1 -13    7.85    2.45
   2   1 -12  248.86   15.32
   2  -1 -12  254.70   15.32
   2  -1 -12  225.66   15.17
   2   1 -11  108.67    8.60
   2   1 -11  126.82    8.79
  -2  -1  11  117.78    8.67
   2  -1 -11  110.92    8.58
   2  -1 -11  133.50    9.04
   2   1 -10  114.83    8.19
   2   1 -10  107.97    8.10
  -2   1  10   92.74   10.83
   2  -1 -10  110.30    8.08
   2  -1 -10  112.89    8.32
   2  -1  -9  190.23   12.25
  -2   1   9  193.43   15.82
  -2   1   9  190.02   15.70
  -2  -1   9  177.74   15.94
   2   1  -9  186.77   12.26
   2  -1  -9  196.54   15.48
   2  -1  -9  196.51   12.36
  -2   1   8  204.12   15.51
  -2   1   8  186.68   15.20
  -2  -1   8  174.02   14.81
  -2  -1   8  197.54   15.90
  -2   1   8  211.45   15.69
  -2   1   7   38.42    5.87
  -2  -1   7   30.31    5.46
  -2  -1   7   33.75    5.28
  -2   1   7   32.66    5.14
  -2   1   7   28.17    4.82
   2  -1  -6  420.16   27.07
  -2   1   6  426.13   27.24
  -2  -1   6  460.27   27.50
  -2   1   6  436.44   27.58
  -2  -1   6  419.37   27.81
  -2   1   6  493.68   28.83
  -2   1   6  477.08   27.58
  -2   1   5  410.16   24.22
  -2   1   5  371.11   24.43
  -2   1   5  369.48   23.08
  -2  -1   5  372.92   23.04
   2  -1  -5  367.19   23.10
  -2  -1   5  386.41   23.72
  -2   1   5  393.44   23.35
  -2   1   4 2090.71  113.51
  -2   1   4 2087.43  114.00
  -2  -1   4 2141.15  112.58
  -2  -1   4 2050.73  112.00
  -2   1   4 2143.14  112.33
   2  -1  -4 2005.03  112.08
  -2   1   3   61.83    4.90
  -2  -1   3   52.11    4.71
  -2  -1   3   58.29    4.43
  -2   1   3   53.52    5.89
  -2   1   3   51.11    5.78
   2  -1  -2   89.67    6.66
  -2   1   2   87.35    7.47
  -2  -1   2   92.43    6.38
  -2   1   2   97.11    7.34
  -2   1   2   96.39    6.82
  -2   1   2   97.32    6.63
   2  -1  -2   95.26    6.60
  -2   1   1  433.52   23.96
  -2   1   1  423.95   24.28
  -2   1   1  439.24   24.46
  -2   1   1  406.27   24.53
   2  -1  -1  434.98   24.29
  -2   1   1  419.72   24.17
  -2  -1   1  484.06   24.53
  -2   1   1  429.88   23.97
   2  -1  -1  417.49   24.05
  -2   1   0 7915.56  443.25
  -2  -1   0 9742.49  443.38
  -2   1   0 7289.29  443.57
  -2  -1   0 9998.58  443.64
  -2  -1   0 9999.00  443.64
   2   1   0 9380.81  443.13
   2  -1   0 7997.78  443.36
  -2   1   0 7461.08  442.85
  -2   1   0 8032.76  443.15
   2  -1   0 7543.97  443.06
  -2   1   0 7250.91  443.02
  -2  -1   0 9951.45  443.92
  -2  -1  -1    2.76    1.94
  -2   1  -1    2.72    1.49
  -2   1  -1    3.25    1.43
  -2   1  -1    2.47    1.68
  -2   1  -1    3.11    1.35
  -2  -1  -1    4.95    2.18
  -2   1  -1    3.57    1.82
   2  -1   1    2.30    1.66
  -2  -1  -1    0.41    1.51
  -2  -1  -1    4.02    2.11
   2  -1   1    3.33    1.54
  -2  -1  -1    3.24    1.80
  -2   1  -2  192.35   11.85
  -2   1  -2  192.16   11.75
  -2  -1  -2  195.00   12.48
  -2   1  -2  212.62   12.40
  -2   1  -2  208.35   12.53
  -2   1  -2  189.88   12.06
  -2  -1  -2  187.50   12.38
  -2  -1  -2  193.03   12.37
  -2   1  -2  185.05   13.12
  -2  -1  -2  204.45   12.46
  -2   1  -2  183.35   12.53
  -2  -1  -2  195.23   12.39
  -2   1  -3   49.23    4.60
  -2   1  -3   50.83    5.53
  -2  -1  -3   59.76    5.58
  -2   1  -3   57.78    5.24
  -2  -1  -3   56.19    5.63
  -2  -1  -3   54.86    5.29
  -2  -1  -3   52.80    5.56
  -2   1  -3   55.80    4.90
  -2   1  -3   47.46    6.12
  -2   1  -3   49.71    4.57
  -2   1  -4  761.64   50.71
  -2   1  -4  901.91   48.72
  -2  -1  -4  968.77   51.17
  -2  -1  -4  907.78   50.31
  -2   1  -4  836.70   48.65
  -2   1  -5  461.64   33.27
  -2  -1  -5  590.43   33.67
  -2  -1  -6   55.91    8.24
   2  -1   6   47.70    7.38
  -2   1  -6   67.96    9.14
  -2   1  -7   82.89    9.57
   2  -1   7   56.81    8.44
  -2  -1  -7   67.29    9.38
  -2   1  -8   60.66    8.37
  -2  -1  -8   66.91    6.20
  -2  -1  -8   63.86    6.40
  -2  -1  -8   51.31    4.90
  -2   1  -8   53.05    4.92
  -2   1  -8   60.36    5.81
  -2  -1  -8   58.13    8.59
  -2   1  -8   57.02    5.85
  -2  -1  -8   52.01    5.31
  -2   1  -8   55.90    5.44
  -2  -1  -8   53.51    5.89
  -2   1  -9  232.10   15.26
  -2  -1  -9  228.19   14.56
  -2  -1  -9  238.39   15.33
  -2   1  -9  225.73   14.97
  -2   1  -9  233.66   14.65
  -2  -1  -9  230.96   15.00
  -2   1  -9  231.51   15.03
  -2  -1  -9  240.66   15.36
  -2  -1 -10    5.64    2.22
  -2   1 -10    5.11    2.28
  -2  -1 -10    2.10    2.18
  -2  -1 -10    2.09    2.27
  -2   1 -10    5.45    2.66
  -2   1 -10    1.66    2.35
  -2   1 -11   17.96    3.00
  -2   1 -11   17.39    3.06
  -2  -1 -11   15.77    2.94
  -2   1 -11   21.16    3.44
  -2  -1 -11   17.56    3.19
  -2  -1 -11   19.47    3.50
  -2  -1 -12   25.91    3.41
  -2  -1 -12   28.83    3.45
  -2   1 -12   26.33    3.35
  -2   1 -12   28.36    3.61
  -2   1 -13    0.21    1.58
  -2   1 -13    2.31    1.55
  -2  -1 -13    3.72    1.78
  -2   1 -14  223.74   13.13
   2  -2 -15   26.32    2.62
   2   2 -15   24.62    2.55
   2  -2 -14   83.95    6.39
   2   2 -14   73.79    6.20
  -2  -2  13  673.93   38.07
   2   2 -13  610.94   37.87
   2  -2 -12    0.96    2.23
   2  -2 -12    2.41    2.08
   2   2 -12    0.30    2.09
  -2  -2  12    2.47    2.14
   2  -2 -11  404.82   23.02
   2  -2 -11  369.52   22.71
  -2  -2  11  377.15   22.69
   2  -2 -10  139.62    9.64
   2  -2 -10  135.65    9.74
  -2   2   9  513.60   33.66
  -2  -2   9  545.63   35.19
  -2   2   9  525.50   34.08
   2  -2  -9  510.19   29.88
   2  -2  -9  530.38   33.73
   2  -2  -9  523.29   29.87
   2   2  -9  532.11   30.13
   2  -2  -8  974.09   56.14
  -2   2   8  955.62   55.91
  -2   2   8  969.16   56.22
  -2   2   8  969.21   56.50
   2  -2  -8  931.32   55.95
  -2  -2   8  935.39   57.19
  -2   2   7  361.57   24.11
   2  -2  -7  363.42   24.34
  -2   2   7  367.80   24.95
  -2   2   7  379.21   24.18
   2  -2  -7  400.72   24.58
  -2  -2   7  351.39   25.14
  -2   2   7  373.41   24.26
  -2   2   6   38.09    5.58
  -2   2   6   35.75    5.91
  -2   2   6   30.52    4.58
  -2   2   6   40.66    5.09
  -2  -2   6   34.72    5.62
   2  -2  -6   37.92    5.27
  -2   2   5  153.14   11.39
  -2   2   5  140.66   11.91
  -2  -2   5  132.80   10.91
  -2   2   5  130.43   10.06
   2  -2  -5  136.20   10.32
  -2   2   4 2136.62  116.51
  -2   2   4 2221.80  114.07
  -2  -2   4 2081.81  114.41
   2  -2  -4 1952.97  113.91
  -2   2   4 2260.36  115.87
  -2   2   3  367.15   20.95
  -2   2   3  372.31   22.97
  -2   2   3  351.06   20.72
   2  -2  -3  380.98   21.25
  -2   2   3  347.14   23.21
  -2  -2   3  358.04   21.04
  -2   2   3  363.48   21.11
   2  -2  -3  351.58   20.96
   2  -2  -2  152.01    9.79
  -2  -2   2  138.92    9.74
  -2   2   2  142.00   11.12
   2  -2  -2  154.04    9.69
  -2  -2   2  143.91    9.12
  -2   2   2  155.28    9.53
   2  -2  -2  152.07    9.70
  -2   2   2  131.99   10.80
  -2   2   2  152.73    9.72
  -2   2   2  144.47    9.10
  -2  -2   1  609.21   34.46
  -2   2   1  588.87   35.38
   2  -2  -1  665.76   34.60
   2  -2  -1  644.14   34.19
  -2   2   1  620.00   34.88
  -2   2   1  571.81   34.46
  -2  -2   1  571.49   33.91
  -2   2   1  645.41   34.17
  -2  -2   1  609.74   34.16
   2  -2  -1  644.30   34.43
  -2   2   1  652.64   34.27
  -2   2   0  619.16   34.30
  -2   2   0  636.56   34.27
  -2  -2   0  630.90   34.53
  -2   2   0  653.30   34.24
  -2  -2   0  603.40   34.18
   2  -2   0  646.25   34.63
   2  -2   0  632.39   34.44
  -2  -2   0  616.51   34.64
  -2  -2   0  556.97   34.55
  -2  -2  -1 1595.70   90.55
  -2   2  -1 1719.99   91.67
  -2   2  -1 1600.39   89.98
  -2  -2  -1 1571.78   90.13
  -2   2  -1 1773.54   90.08
  -2   2  -1 1683.78   90.15
  -2   2  -1 1751.04   90.15
   2  -2   1 1670.99   90.46
   2  -2   1 1643.70   90.25
  -2   2  -1 1825.25   89.82
  -2  -2  -1 1617.34   90.08
  -2  -2  -2    1.83    1.95
  -2   2  -2    2.74    1.79
  -2   2  -2    4.98    1.81
  -2   2  -2    3.90    1.62
  -2  -2  -2    3.00    1.74
  -2  -2  -2    4.40    2.28
  -2  -2  -2    5.37    2.18
  -2   2  -2    3.45    3.23
  -2   2  -2   -0.34    2.73
   2  -2   2    3.71    2.10
  -2  -2  -3    8.54    2.84
  -2   2  -3    6.74    2.08
  -2  -2  -3   12.16    3.15
  -2   2  -3    4.91    3.91
  -2   2  -3    0.62    4.09
  -2   2  -3    7.11    2.27
  -2  -2  -3    8.44    2.55
   2  -2   3   10.17    2.60
  -2   2  -4 1475.12   80.77
  -2   2  -4 1465.40   80.92
  -2  -2  -4 1628.50   82.18
  -2  -2  -4 1671.04   83.23
  -2  -2  -4 1636.29   83.36
  -2  -2  -5   59.50    7.27
  -2   2  -5   40.97    7.34
  -2  -2  -6   37.46    6.76
  -2   2  -6   53.12    7.76
   2  -2   7   51.53    8.37
  -2  -2  -7   56.83    8.38
  -2   2  -7   72.29    9.02
  -2  -2  -8  122.07   14.25
  -2  -2  -8  143.64    9.76
  -2   2  -8  139.44    9.87
  -2   2  -8  150.19   10.37
   2  -2   8  115.44   13.49
  -2  -2  -8  142.10   13.82
  -2  -2  -8  139.58    9.45
  -2   2  -8  139.43   13.35
  -2  -2  -8  135.71   10.29
  -2   2  -8  134.19    9.89
  -2  -2  -8  134.62   10.48
  -2   2  -9  560.95   32.02
  -2   2  -9  545.53   32.07
  -2   2  -9  600.37   32.80
  -2  -2  -9  611.84   32.30
  -2   2  -9  553.05   32.30
  -2  -2  -9  568.47   32.86
  -2  -2  -9  513.06   32.14
  -2   2 -10  152.90   10.38
  -2   2 -10  161.49   10.66
  -2  -2 -10  162.16   10.54
  -2   2 -10  152.64   10.48
  -2  -2 -10  147.83   10.66
  -2  -2 -10  146.73   10.55
  -2   2 -10  135.18   10.51
  -2  -2 -11  263.92   15.98
  -2  -2 -11  244.06   15.76
  -2   2 -11  264.26   16.21
  -2   2 -11  260.80   15.83
  -2   2 -11  240.85   15.78
  -2   2 -11  253.91   15.79
  -2   2 -12   15.31    2.63
  -2  -2 -12   17.40    2.84
  -2   2 -12   12.11    2.52
  -2  -2 -12   16.35    2.67
  -2   2 -13  548.94   29.23
  -2  -2 -13  494.46   29.07
  -2   2 -13  514.27   28.97
  -2   2 -14    9.03    1.70
   2  -3 -15  482.97   27.71
   2   3 -15  520.30   27.70
   2  -3 -14  116.57    8.20
   2   3 -14  128.93    8.23
  -2  -3  14  119.68    8.19
   2  -3 -13    0.85    2.21
  -2  -3  13    0.56    1.92
   2  -3 -12    9.92    2.88
  -2  -3  12   11.03    2.69
   2  -3 -11   54.54    5.38
   2  -3 -11   59.44    5.64
   2  -3 -10   14.69    3.17
   2  -3 -10   18.53    3.36
   2   3 -10   14.63    2.99
   2   3  -9 1286.97   73.94
   2   3  -9 1289.68   69.75
   2  -3  -9 1251.34   74.00
  -2  -3   9 1278.45   75.37
   2  -3  -9 1325.52   69.64
   2  -3  -9 1214.87   69.42
   2  -3  -9 1270.12   73.78
   2   3  -8   50.25    7.28
   2  -3  -8   48.84    7.11
  -2   3   8   41.69    6.68
  -2  -3   8   45.63    7.51
   2  -3  -8   48.78    6.95
   2  -3  -7    2.80    2.97
   2  -3  -7    3.99    3.14
  -2   3   7    0.77    3.03
  -2  -3   7    1.77    3.57
  -2   3   7    0.66    2.94
  -2   3   6  163.46   13.08
  -2   3   6  160.88   14.18
   2  -3  -6  167.41   12.79
  -2  -3   6  170.29   14.18
  -2   3   6  176.68   12.38
   2  -3  -6  161.54   13.16
   2  -3  -5 1322.42   69.15
  -2  -3   5 1215.34   68.33
  -2   3   5 1280.54   67.84
   2  -3  -5 1257.40   68.31
  -2  -3   5 1103.56   68.93
  -2   3   5 1286.44   69.53
  -2   3   5 1143.81   67.54
   2  -3  -4  170.61   12.30
  -2  -3   4  173.45   12.10
  -2   3   4  168.59   11.39
   2  -3  -4  180.55   11.89
  -2   3   4  174.51   13.30
  -2   3   4  159.05   11.27
  -2   3   3   83.90    8.13
  -2   3   3   74.77    5.79
  -2  -3   3   70.45    6.22
   2  -3  -3   75.33    6.44
   2  -3  -3   70.71    5.86
   2  -3  -3   68.35    5.83
   2  -3  -3   66.51    5.94
  -2   3   3   62.56    5.53
   2  -3  -2  103.60    6.98
  -2   3   2   90.19    6.93
  -2   3   2   92.26    6.81
   2  -3  -2  103.35    7.26
   2  -3  -2   92.22    6.92
   2  -3  -2   96.27    7.11
  -2  -3   2   83.13    6.39
  -2  -3   2   91.05    7.22
  -2   3   2  102.81    9.32
  -2  -3   1   10.14    2.55
  -2   3   1   10.53    2.26
  -2   3   1   12.64    2.35
   2  -3  -1   11.52    2.17
   2  -3  -1   13.32    2.50
  -2  -3   1    9.63    2.08
  -2  -3   1   10.93    2.48
   2  -3  -1   11.39    2.35
  -2   3   1   10.19    4.71
  -2  -3   0  351.24   20.16
   2  -3   0  355.01   20.85
  -2   3   0  353.88   20.49
   2  -3   0  354.56   20.83
  -2   3   0  352.83   21.76
  -2   3   0  359.26   20.29
  -2   3   0  360.40   20.63
  -2  -3   0  361.72   20.84
  -2  -3  -1  457.74   26.89
  -2   3  -1  524.18   29.32
   2  -3   1  474.04   27.53
  -2   3  -1  458.70   27.09
   2  -3   1  475.42   27.41
  -2   3  -1  514.68   27.28
  -2  -3  -2  113.58    8.34
  -2  -3  -2  132.89    8.95
  -2   3  -2  113.64    8.27
  -2   3  -2  111.51   10.65
   2  -3   2  114.63    8.59
  -2   3  -2  126.42    8.39
  -2  -3  -3  103.97    7.56
  -2   3  -3   96.50    7.04
  -2  -3  -3   91.62    7.85
  -2   3  -3   77.55    8.81
  -2   3  -3   88.15    7.02
   2  -3   3   78.33    7.30
  -2   3  -3   66.92    9.29
  -2  -3  -3   82.38    7.23
  -2   3  -4   -1.51    4.20
  -2  -3  -4    0.64    3.03
  -2   3  -4    1.58    1.90
  -2  -3  -4   -0.44    2.40
  -2   3  -4   -0.75    1.96
  -2  -3  -4   -0.57    2.59
   2  -3   4    0.44    2.25
  -2  -3  -5 2051.74  126.63
  -2   3  -5 2463.53  127.73
  -2   3  -5 2367.33  124.22
  -2  -3  -5 2369.89  125.40
  -2   3  -5 2193.49  124.12
  -2  -3  -6   89.01    9.84
  -2  -3  -6   67.44   10.46
   2  -3   7  108.62   12.11
  -2   3  -7  129.14   11.69
  -2  -3  -8  137.79   16.56
  -2   3  -8  186.77   11.51
  -2  -3  -8  148.37   12.16
   2  -3   8  167.97   16.67
  -2   3  -8  204.11   16.05
  -2   3  -8  168.96   11.49
  -2   3  -8  184.31   11.98
  -2   3  -9 1346.78   70.84
  -2   3  -9 1205.74   70.73
  -2  -3  -9 1333.40   70.85
  -2   3  -9 1254.83   70.72
  -2   3  -9 1406.47   71.42
  -2  -3  -9 1245.71   71.39
  -2  -3 -10    4.58    2.60
  -2   3 -10    2.82    1.89
  -2  -3 -10    3.13    1.95
  -2   3 -10    5.49    1.88
  -2   3 -10    2.83    2.54
  -2  -3 -11  121.19    8.53
  -2  -3 -11  121.55    8.55
  -2   3 -11  113.52    8.40
  -2   3 -11  121.80    8.49
  -2   3 -11  108.38    8.53
  -2   3 -11  109.60    8.26
  -2  -3 -12    2.14    1.75
  -2   3 -12   -0.27    1.68
  -2   3 -12    4.11    1.72
  -2   3 -13    2.47    1.45
  -2   3 -13    1.38    1.52
  -2   3 -13    1.67    1.47
  -2   3 -14   59.86    4.29
   2  -4 -15   -0.14    1.21
   2   4 -15    0.77    1.12
  -2  -4  15    0.14    1.19
   2  -4 -14   55.87    4.59
  -2  -4  14   49.66    4.37
   2   4 -14   52.57    4.26
   2  -4 -13  792.19   42.15
  -2  -4  13  721.81   41.93
   2  -4 -12   68.85    6.10
  -2  -4  12   61.36    5.70
   2  -4 -11  367.22   22.05
   2  -4 -10  361.23   20.52
   2  -4 -10  345.44   20.46
   2   4 -10  301.86   20.19
   2  -4  -9  177.59   17.12
   2  -4  -9  206.78   13.77
   2  -4  -9  206.12   13.88
   2   4  -9  227.69   14.15
   2   4  -9  218.71   18.17
   2   4  -9  241.39   14.15
  -2   4   9  211.63   17.28
  -2   4   8  116.37   11.67
   2  -4  -8  129.86    9.05
  -2   4   8  107.14   11.82
   2  -4  -8  114.96   11.84
   2   4  -8  131.63    9.13
   2  -4  -8  129.78   12.49
   2  -4  -8  129.97    8.93
   2   4  -8  125.06    8.86
  -2   4   8  116.69   11.35
   2  -4  -7   84.29    9.74
   2  -4  -7  113.70   10.56
  -2   4   7   93.32   10.55
  -2   4   7   91.37    9.87
  -2   4   7   95.61    9.28
  -2   4   6  430.87   27.04
   2  -4  -6  386.81   26.75
   2  -4  -6  432.53   26.51
  -2   4   6  397.87   25.61
   2  -4  -5  608.42   35.62
  -2  -4   5  607.46   35.77
  -2   4   5  591.28   36.66
   2  -4  -5  577.54   36.12
  -2   4   5  608.99   35.13
  -2   4   4   21.75    5.08
  -2  -4   4   27.05    4.25
   2  -4  -4   28.85    4.12
   2  -4  -4   34.04    4.73
  -2   4   4   28.16    3.96
  -2   4   3  336.28   20.22
   2  -4  -3  321.08   20.71
   2  -4  -3  327.19   20.10
  -2  -4   3  330.70   20.78
   2  -4  -3  352.90   20.51
  -2   4   3  381.94   23.15
   2  -4  -3  358.92   20.60
  -2   4   3  304.06   19.96
  -2  -4   2   49.48    5.03
   2  -4  -2   39.24    4.47
  -2   4   2   40.26    7.03
  -2   4   2   40.23    4.33
   2  -4  -2   49.19    4.58
  -2   4   2   46.87    4.60
   2  -4  -2   46.44    4.84
  -2   4   1  531.46   36.65
  -2   4   1  583.87   34.08
  -2   4   1  630.19   35.20
   2  -4  -1  631.29   34.63
   2  -4  -1  624.74   34.70
  -2  -4   1  608.95   34.88
  -2   4   1  639.24   34.44
  -2  -4   1  605.45   34.25
  -2   4   0    2.14    2.09
  -2   4   0    3.48    3.04
  -2   4   0    0.26    1.79
   2  -4   0    2.73    1.97
  -2   4   0    3.08    1.85
   2  -4   0    1.23    2.12
  -2  -4   0    1.87    2.07
  -2   4  -1 1501.60   80.01
  -2   4  -1 1479.60   82.22
  -2   4  -1 1506.14   80.09
   2  -4   1 1461.57   80.45
   2  -4   1 1466.37   80.42
  -2   4  -1 1440.02   79.87
  -2   4  -2    3.08    2.03
  -2  -4  -2   10.17    3.38
  -2  -4  -2    6.43    2.65
  -2   4  -2    8.52    4.89
  -2   4  -2    7.45    2.24
  -2  -4  -2    5.59    1.88
   2  -4   2    9.93    2.79
  -2  -4  -3    5.38    2.19
  -2   4  -3    6.39    2.59
  -2  -4  -3    7.29    3.11
  -2   4  -3    6.85    5.28
  -2   4  -3    5.51    2.28
   2  -4   3    8.19    2.82
  -2   4  -4   19.89    3.55
  -2   4  -4   12.62    3.18
  -2  -4  -4   14.02    4.69
  -2   4  -4   20.43    5.91
  -2  -4  -4   25.13    4.42
   2  -4   4   16.84    3.75
  -2   4  -5  555.31   33.78
  -2   4  -5  592.78   33.71
  -2  -4  -5  507.49   35.20
   2  -4   5  575.70   34.39
  -2  -4  -6   93.68   11.49
  -2   4  -7  153.16    9.73
   2  -4   7  125.25   13.98
  -2   4  -7  154.74   13.42
  -2   4  -8   48.56    4.98
  -2   4  -9  352.66   21.88
  -2   4  -9  387.76   22.34
  -2   4  -9  368.93   21.96
  -2   4 -10  141.34    9.35
  -2   4 -10  110.42    8.86
  -2   4 -10  129.37    9.26
  -2   4 -11  187.84   11.92
  -2   4 -11  176.18   11.82
  -2  -4 -11  177.77   11.83
  -2   4 -11  178.42   11.79
  -2   4 -12  130.28    8.84
  -2   4 -13  649.90   35.96
  -2   4 -13  658.04   35.98
   2  -5 -14   23.35    2.84
   2   5 -14   23.41    2.63
   2   5 -13   39.07    3.89
  -2  -5  13   45.05    4.32
   2  -5 -13   43.90    4.27
   2  -5 -12  111.42    8.32
   2  -5 -11   69.86    6.30
   2  -5 -10   31.42    4.14
   2   5 -10   29.89    4.00
   2  -5  -9 1152.66   65.16
   2   5  -9 1276.46   65.49
   2   5  -9 1139.46   65.29
  -2   5   8   13.45    4.54
   2  -5  -8   16.02    3.18
   2  -5  -8   13.61    4.69
  -2   5   8   14.56    4.97
   2  -5  -8   18.34    5.21
   2   5  -8   17.63    3.17
   2  -5  -8   12.54    3.13
   2   5  -8   20.49    3.17
  -2   5   8   21.03    4.92
   2  -5  -7    0.89    3.85
   2  -5  -7    4.76    3.75
  -2   5   7   -0.80    2.98
  -2   5   7    2.71    2.88
   2  -5  -6   47.96    6.28
   2  -5  -6   38.98    6.44
  -2   5   6   39.64    6.43
  -2   5   6   41.43    5.85
  -2   5   5  629.63   35.73
   2  -5  -5  605.86   37.22
   2  -5  -5  628.72   36.40
  -2   5   5  549.31   37.06
  -2   5   5  582.98   35.67
  -2  -5   5  620.35   36.62
  -2   5   4  396.20   25.81
  -2   5   4  383.39   23.54
  -2  -5   4  390.78   24.50
   2  -5  -4  396.46   24.12
  -2   5   4  368.47   23.60
  -2   5   3  275.74   17.49
  -2  -5   3  253.71   18.14
   2  -5  -3  300.25   18.08
  -2   5   3  294.77   20.27
   2  -5  -3  275.98   17.82
   2  -5  -2  554.72   31.76
  -2   5   2  499.70   31.17
   2  -5  -2  558.12   31.73
  -2   5   2  557.48   34.31
   2  -5  -2  539.94   31.36
  -2   5   2  567.08   31.42
  -2   5   1  262.82   16.86
   2  -5  -1  273.48   17.31
  -2   5   1  301.91   18.03
  -2   5   1  272.86   16.93
   2  -5  -1  271.51   17.04
   2  -5  -1  267.65   17.22
   2  -5   0  814.53   44.82
  -2   5   0  799.77   44.33
  -2   5   0  820.15   46.05
  -2   5   0  811.44   44.38
   2  -5   0  808.29   44.93
  -2   5   0  733.78   44.22
  -2   5  -1   85.03    7.00
  -2   5  -1   86.82    8.91
   2  -5   1   81.09    7.14
   2  -5   1   75.87    7.10
  -2   5  -1   88.39    6.89
  -2   5  -1   91.89    6.92
  -2   5  -2  364.11   22.08
  -2   5  -2  392.42   22.26
  -2  -5  -2  371.72   22.82
   2  -5   2  341.94   22.65
  -2   5  -2  363.74   25.10
   2  -5   2  349.15   22.64
  -2   5  -3  271.90   16.60
  -2   5  -3  242.01   16.14
  -2   5  -3  213.38   19.03
   2  -5   3  247.55   16.93
  -2   5  -4  597.63   33.63
   2  -5   4  576.34   34.19
  -2   5  -4  575.63   33.27
   2  -5   5  965.23   59.99
  -2   5  -5 1065.45   59.61
  -2   5  -5 1082.40   59.44
  -2   5  -6  128.12   11.35
   2  -5   6  118.66   12.10
  -2   5  -6  146.97    9.67
  -2   5  -7    1.33    1.93
   2  -5   7   -1.24    3.46
  -2   5  -8   27.15    3.81
  -2   5  -9  734.66   42.33
  -2   5  -9  774.83   42.67
  -2   5 -10   20.24    3.31
  -2   5 -10   27.58    3.73
  -2   5 -10   21.73    3.29
  -2   5 -11   29.12    3.52
  -2   5 -11   24.64    3.19
  -2   5 -12    5.23    1.74
  -2   5 -12    5.72    1.93
  -2   5 -13   12.04    1.96
   2  -6 -14    3.72    1.54
  -2  -6  14    1.55    1.44
  -2  -6  13  161.15   10.74
   2  -6 -13  177.52   10.89
   2  -6 -12  218.72   13.15
  -2  -6  12  187.09   12.80
   2  -6 -11    9.88    2.94
   2  -6 -10    0.69    2.57
   2   6 -10    1.42    2.03
   2   6 -10    3.61    2.46
   2  -6  -9   16.59    3.51
   2   6  -9   16.69    3.29
   2  -6  -8  786.42   45.86
  -2   6   8  790.85   49.45
   2   6  -8  870.20   46.26
  -2   6   8  852.65   50.29
  -2   6   7   32.11    5.59
  -2   6   7   39.21    6.92
   2  -6  -7   28.13    3.72
   2  -6  -7   31.34    6.05
   2   6  -7   31.85    3.92
  -2   6   7   36.02    6.10
  -2   6   6  309.24   21.94
   2  -6  -6  288.81   21.03
  -2   6   6  293.53   20.59
  -2   6   6  290.67   19.99
  -2   6   5 1749.74   96.04
   2  -6  -5 1694.33   94.44
  -2   6   5 1660.06   93.43
   2  -6  -4  850.64   48.33
  -2   6   4  791.21   47.37
  -2   6   4  892.98   50.42
   2  -6  -4  826.21   47.80
  -2   6   3   35.87    4.86
  -2   6   3   49.02    7.15
  -2   6   3   31.49    4.35
   2  -6  -3   39.33    5.09
   2  -6  -3   35.89    5.05
  -2   6   2  192.07   13.22
   2  -6  -2  187.95   13.40
  -2   6   2  195.10   15.68
   2  -6  -2  186.87   13.42
  -2   6   1  694.21   38.90
  -2   6   1  663.56   38.96
   2  -6  -1  668.73   39.44
  -2   6   1  657.31   39.87
  -2   6   1  644.62   38.82
   2  -6  -1  721.60   39.26
   2  -6  -1  737.28   39.76
  -2   6   0   17.82    3.22
  -2   6   0   18.98    4.12
  -2   6   0   14.12    3.24
   2  -6   0   18.75    3.32
  -2   6   0   13.64    2.98
   2  -6   0   18.10    3.49
  -2   6  -1  705.96   40.28
  -2   6  -1  702.12   40.11
  -2  -6  -1  696.32   41.27
  -2   6  -1  716.69   42.76
   2  -6   1  743.79   41.01
   2  -6   1  662.18   40.76
  -2   6  -1  724.38   40.60
   2  -6   2   45.60    5.59
  -2   6  -2   46.13    5.09
  -2  -6  -2   36.01    5.71
  -2   6  -2   36.05    4.93
  -2   6  -2   33.88    7.00
   2  -6   2   54.80    5.97
  -2   6  -3   80.93    7.37
  -2   6  -3   78.36    7.34
  -2   6  -3   67.49   10.02
   2  -6   3   75.99    7.91
  -2   6  -4  674.76   37.49
  -2   6  -4  618.66   36.92
  -2   6  -4  588.60   40.35
   2  -6   4  585.39   37.76
  -2   6  -5  555.48   34.77
  -2   6  -5  587.84   38.27
   2  -6   5  557.26   36.03
  -2   6  -5  592.14   35.35
  -2   6  -6    3.43    1.88
  -2   6  -6    3.48    2.42
  -2   6  -6    3.92    2.27
   2  -6   6    4.70    4.08
  -2   6  -6    2.08    1.53
   2  -6   6    3.56    3.61
  -2   6  -7   33.05    4.19
  -2   6  -8  487.06   28.60
  -2   6  -9   18.76    3.14
  -2   6  -9   11.32    2.78
  -2   6 -10   -0.31    1.88
  -2   6 -10   -1.01    1.87
  -2   6 -11    0.86    1.87
  -2   6 -11    2.73    1.81
  -2   6 -12   82.86    5.92
  -2   6 -12   77.22    5.90
  -2   6 -13   58.50    4.39
  -2   6 -13   66.37    4.54
  -2  -7  14   49.30    3.79
   2  -7 -13   58.25    4.77
  -2  -7  13   61.33    4.81
   2  -7 -12   36.30    4.18
  -2  -7  12   43.39    4.43
  -2  -7  12   35.82    3.96
   2  -7 -11   11.59    3.01
   2  -7 -10  142.18   10.25
   2   7 -10  140.19   10.19
   2  -7  -9  486.62   28.45
   2   7  -9  484.76   28.58
   2  -7  -8   74.37    6.62
   2   7  -8   79.82    6.79
   2  -7  -7   34.09    4.09
   2   7  -7   27.75    3.92
  -2   7   6  136.94   13.47
   2  -7  -6  129.24   12.48
   2  -7  -6  136.19    9.31
   2  -7  -6  123.85    9.60
  -2   7   5   49.10    7.58
  -2   7   5   38.43    5.98
   2  -7  -5   39.32    6.24
  -2   7   4  745.56   44.21
   2  -7  -4  700.47   42.23
   2  -7  -4  692.27   41.71
  -2   7   4  698.24   41.78
  -2   7   3  555.62   32.29
   2  -7  -3  509.09   32.35
  -2   7   3  563.91   34.81
  -2   7   3  538.10   31.70
   2  -7  -3  497.50   32.01
  -2   7   2   64.32    6.37
  -2   7   2   66.89    6.87
   2  -7  -2   54.07    6.58
   2  -7  -2   47.95    6.16
  -2   7   1 1058.13   58.13
  -2   7   1 1055.11   58.47
   2  -7  -1 1022.86   59.12
   2  -7  -1 1007.03   58.76
  -2   7   0 2097.62  116.54
  -2   7   0 2104.47  118.22
   2  -7   0 2273.62  117.43
  -2  -7   0 2102.51  117.75
  -2   7  -1  494.41   29.24
  -2   7  -1  479.54   29.33
  -2  -7  -1  505.28   30.74
  -2   7  -1  479.11   31.48
   2  -7   1  475.41   29.85
   2  -7   1  491.20   29.77
   2  -7   2   27.36    4.76
  -2   7  -2   31.72    4.40
  -2  -7  -2   33.29    5.82
  -2   7  -2   29.18    6.53
  -2   7  -2   25.68    4.10
   2  -7   2   26.88    4.84
  -2   7  -3  778.59   44.27
  -2   7  -3  748.67   44.00
  -2  -7  -3  772.18   45.63
  -2   7  -3  777.04   47.78
   2  -7   3  721.29   44.70
   2  -7   3  736.35   44.96
  -2  -7  -4  353.55   22.53
  -2   7  -4  367.15   25.09
  -2   7  -4  359.04   24.84
  -2   7  -4  394.48   28.57
   2  -7   4  330.32   25.51
  -2  -7  -4  411.28   23.88
  -2   7  -4  458.88   22.71
   2  -7   4  398.44   26.44
  -2   7  -5    1.51    1.80
  -2   7  -5    5.00    3.11
  -2   7  -5   -1.35    2.43
  -2   7  -5    0.95    2.03
  -2   7  -5   -1.10    3.81
  -2  -7  -5    0.76    3.08
  -2  -7  -5   -0.48    3.92
   2  -7   5    5.23    3.33
  -2   7  -6  144.85    9.94
  -2   7  -6  147.63    9.43
  -2  -7  -6  140.86    9.66
  -2   7  -7   22.31    3.07
  -2   7  -7   37.59    4.28
  -2   7  -8    6.60    2.43
  -2   7  -9   90.32    7.40
  -2   7  -9  101.27    7.80
  -2   7 -10    4.44    1.85
  -2   7 -10    2.86    2.01
  -2   7 -11   47.99    4.49
  -2   7 -11   46.62    4.34
  -2   7 -12   14.99    2.20
  -2   7 -12   20.91    2.47
  -2  -8  13   23.31    2.64
   2  -8 -13   23.38    2.72
  -2  -8  13   21.66    2.50
  -2  -8  12    0.95    2.10
   2  -8 -12    0.87    1.98
  -2  -8  12   -0.23    1.64
  -2  -8  11  147.40   10.50
   2   8 -10  353.65   21.42
   2  -8  -9  110.00    8.62
   2   8  -9  111.57    8.64
   2  -8  -8  187.22   12.87
   2   8  -8  197.72   13.10
   2   8  -7  154.01   11.04
   2  -8  -7  159.05   11.15
  -2  -8   6    5.54    4.52
  -2  -8   6    6.32    3.36
   2  -8  -6    7.89    3.39
   2  -8  -5  485.60   31.15
  -2   8   5  517.38   32.70
  -2   8   5  501.87   30.56
   2  -8  -5  491.39   27.68
  -2  -8   5  470.60   27.09
  -2   8   4 1012.41   55.47
   2  -8  -4  990.89   56.02
  -2  -8   4  953.69   53.11
  -2   8   4  977.53   57.50
   2  -8  -4  908.11   52.62
  -2  -8   4  921.08   51.81
  -2   8   3   87.54    8.81
   2  -8  -3   81.82    8.84
  -2   8   3   78.96    9.85
  -2   8   2   44.38    6.00
   2  -8  -2   30.51    5.53
   2  -8  -2   37.21    5.49
  -2  -8   1  385.97   26.79
   2  -8  -1  410.65   26.65
  -2   8   1  421.55   25.93
   2  -8  -1  407.59   26.05
  -2  -8   0   12.51    4.31
  -2   8   0   15.33    3.57
   2  -8   0    8.45    3.42
  -2  -8  -1   63.78    8.19
  -2   8  -1   64.16    8.58
   2  -8   1   70.30    7.65
  -2   8  -1   61.51    6.90
  -2   8  -2   30.40    4.80
  -2  -8  -2   28.11    6.13
  -2   8  -2   37.96    7.05
  -2  -8  -2   35.26    4.19
   2  -8   2   39.78    5.69
  -2   8  -3   14.75    5.39
   2   8   3   12.84    4.46
  -2   8  -3   12.98    3.40
  -2   8  -3   12.47    2.39
  -2  -8  -3   10.84    4.18
  -2  -8  -3   13.27    3.50
   2  -8   3   17.45    4.36
   2  -8   3    6.09    3.37
  -2   8  -3   11.85    2.12
  -2  -8  -4  629.50   37.78
  -2  -8  -4  752.90   39.37
  -2   8  -4  651.59   40.68
  -2   8  -4  694.15   44.58
   2  -8   4  649.78   41.85
  -2   8  -4  683.51   37.62
  -2  -8  -5  124.27    9.98
  -2   8  -5  160.49    9.95
  -2  -8  -5  142.13   11.73
  -2   8  -6    8.06    2.40
  -2   8  -6    4.55    2.25
  -2  -8  -6    9.44    3.63
  -2  -8  -6    4.93    4.64
  -2   8  -7  129.03    9.31
  -2  -8  -7  116.02   10.49
  -2   8  -7  121.48    8.32
  -2   8  -8  131.40    9.64
  -2   8  -9   67.68    5.98
  -2   8  -9   64.86    5.81
  -2   8 -10  460.89   25.53
  -2   8 -10  421.39   25.44
  -2   8 -11   81.42    6.08
  -2   8 -11   80.54    5.91
  -2   8 -12    0.75    1.05
  -2   8 -12    1.11    1.21
  -2  -9  12    4.85    1.99
   2  -9 -12    2.01    1.67
  -2  -9  11    3.65    2.55
   2  -9 -11    7.13    2.45
  -2  -9  10   47.02    5.80
   2   9 -10   42.70    4.80
  -2  -9   9   12.40    4.48
   2   9  -9    9.78    2.66
   2   9  -8   42.01    5.04
  -2  -9   8   44.18    6.23
  -2  -9   7   13.63    4.64
  -2  -9   7    9.42    4.26
   2   9  -7    6.02    2.74
   2  -9  -7   11.34    3.47
  -2  -9   6  412.15   28.05
  -2  -9   6  457.57   27.06
   2  -9  -6  459.80   26.80
  -2  -9   5   88.34    9.17
  -2   9   5   96.71    7.24
   2  -9  -5   99.32    8.51
  -2  -9   5  104.32    7.99
  -2   9   4   21.84    5.25
  -2  -9   4   17.47    4.44
  -2   9   4   25.60    3.23
   2  -9  -4   18.22    4.16
  -2  -9   4   19.63    3.41
   2  -9  -3  145.13   13.16
   2   9  -3  149.12    9.71
  -2  -9   3  141.98   10.45
  -2   9   3  162.29   13.37
   2  -9  -3  145.62   10.71
  -2   9   3  148.81    9.59
  -2  -9   2   41.28    7.25
   2  -9  -2   46.93    6.93
  -2   9   2   45.33    6.52
  -2  -9   2   51.53    4.80
   2  -9  -2   51.74    5.14
  -2   9   2   44.40    4.22
  -2   9   1  120.18   10.58
  -2  -9   1   86.64   10.68
   2  -9  -1  112.47   10.83
  -2  -9   1   97.16    7.23
  -2   9   1  106.32    7.19
  -2   9   0  487.36   31.33
  -2  -9   0  474.86   33.11
   2  -9   0  476.81   32.22
  -2  -9   0  505.77   28.66
  -2   9   0  495.26   28.22
  -2   9   0  527.73   28.21
   2  -9   0  506.38   32.01
  -2   9  -1  129.94    8.30
  -2   9  -1  120.01   10.99
  -2  -9  -1  106.43   11.96
  -2  -9  -1  120.38    8.79
   2  -9   1  134.83   11.78
  -2   9  -2  175.05   14.41
  -2   9  -2  175.97   11.45
  -2  -9  -2  184.92   12.45
  -2  -9  -2  180.66   13.66
  -2   9  -2  209.48   12.04
  -2   9  -3  169.06   10.26
  -2   9  -3  151.77    9.75
  -2  -9  -3  137.42   11.23
  -2  -9  -3  136.66   10.84
  -2  -9  -4   16.26    4.32
  -2   9  -4    8.96    2.32
  -2  -9  -4    7.29    4.07
  -2   9  -4    8.33    2.57
  -2  -9  -5   54.93    6.20
  -2  -9  -5   59.00    7.53
  -2   9  -5   64.68    5.55
  -2  -9  -6  378.04   26.33
  -2   9  -6  439.01   24.72
  -2  -9  -6  430.21   24.75
  -2  -9  -7   85.61    7.09
  -2  -9  -7   65.49    8.08
  -2   9  -7   87.56    6.24
  -2   9  -8  217.33   13.64
  -2  -9  -8  200.15   14.20
  -2   9  -9   59.33    5.38
  -2   9  -9   65.84    5.57
  -2   9 -10   24.30    3.01
  -2   9 -10   30.07    3.25
  -2  -9 -10   23.03    3.06
  -2   9 -11   15.52    2.14
  -2   9 -11   13.30    1.98
   2 -10 -12   46.82    3.77
  -2 -10  12   47.92    3.80
   2 -10 -11   34.82    3.68
  -2 -10  11   41.32    4.04
   2 -10 -10  918.42   49.98
   2  10 -10  841.75   49.90
  -2 -10  10  973.68   50.43
   2 -10  -9    8.91    3.27
   2  10  -9   10.32    2.65
  -2 -10   9   10.91    3.86
  -2  10   8    2.23    2.29
   2 -10  -8   -0.71    2.85
  -2 -10   8    1.76    3.55
   2  10  -8   -1.09    2.13
  -2 -10   7   50.80    6.30
   2  10  -7   46.99    5.12
  -2 -10   7   49.39    6.54
   2 -10  -7   38.97    5.20
  -2  10   7   53.48    4.85
  -2 -10   6   32.48    4.86
  -2  10   6   28.49    3.68
  -2 -10   6   24.47    5.68
   2 -10  -6   25.08    4.65
  -2 -10   5   27.01    4.23
  -2 -10   5   24.88    5.82
  -2  10   5   29.34    3.72
   2 -10  -5   23.19    4.71
  -2  10   4   17.45    3.02
  -2 -10   4   19.34    4.49
   2 -10  -4   17.04    4.49
  -2  10   3   10.65    2.64
  -2 -10   3   10.71    3.37
   2  10  -3    8.21    2.55
   2 -10  -3    7.96    3.41
  -2 -10   2    4.40    2.35
  -2  10   2    8.03    2.30
   2 -10  -2    5.39    2.97
  -2 -10   1   34.17    3.81
  -2  10   1   35.34    3.82
  -2  10   1   34.47    3.73
  -2  10   0   35.31    3.78
  -2  10   0   30.98    3.66
  -2  10  -1   50.77    4.57
  -2 -10  -1   50.06    5.21
  -2 -10  -2   44.53    5.15
  -2 -10  -2   51.15    7.62
  -2  10  -2   39.83    4.15
  -2  10  -3    0.55    1.86
  -2 -10  -3   -0.38    4.59
  -2  10  -3    1.86    1.85
  -2 -10  -3   -0.40    3.13
  -2  10  -4  255.86   15.20
  -2 -10  -4  254.55   15.96
  -2  10  -4  222.08   14.55
  -2 -10  -4  251.05   16.67
  -2  10  -5   63.59    5.43
  -2 -10  -5   52.83    6.90
  -2  10  -5   49.58    4.65
  -2 -10  -5   58.71    6.11
  -2 -10  -6  195.69   12.17
  -2 -10  -6  154.38   13.33
  -2 -10  -7    1.81    3.75
  -2  10  -7    2.05    1.65
  -2 -10  -8    0.35    2.95
  -2 -10  -9   13.49    2.72
  -2  10  -9   12.24    2.37
  -2 -10 -10  697.44   39.18
  -2  10 -10  760.48   39.20
  -2  10 -10  685.51   39.09
   2 -11 -11    0.30    1.44
  -2 -11  11    0.16    1.60
  -2 -11  10   17.25    3.10
   2 -11 -10   17.72    2.77
  -2 -11   9  340.80   19.35
   2 -11  -9  307.23   18.77
   2  11  -9  304.31   18.84
  -2  11   8   64.21    5.42
  -2 -11   8   63.76    6.72
   2  11  -8   63.95    5.96
  -2 -11   7    1.33    3.49
  -2 -11   7   -1.92    3.18
  -2  11   7    2.16    2.08
   2  11  -7    0.35    2.29
  -2 -11   6  306.43   18.87
  -2 -11   6  301.24   20.10
  -2  11   6  308.17   17.93
   2  11  -6  282.88   18.54
  -2 -11   5   17.56    4.60
  -2  11   5   14.79    3.00
  -2  11   4   16.19    3.03
  -2 -11   4   10.23    4.07
   2 -11  -4   14.26    3.96
   2  11  -3  113.84    8.48
  -2 -11   3  128.67    9.61
  -2  11   3  116.56    8.40
  -2  11   3  125.40    8.48
  -2  11   2  225.99   13.06
  -2  11   2  189.78   12.77
  -2 -11   2  206.04   13.37
  -2  11   1   91.41    6.95
  -2  11   1   97.82    7.12
  -2  11   0   59.47    5.23
  -2  11   0   57.58    5.09
  -2 -11  -1   41.32    4.74
  -2  11  -1   33.83    3.79
  -2 -11  -2  348.77   21.78
  -2  11  -2  340.11   19.25
  -2 -11  -2  295.88   19.85
  -2  11  -3   96.38    7.24
  -2 -11  -3  104.30    9.43
  -2 -11  -3  101.70    8.58
  -2  11  -4   78.93    6.59
  -2  11  -4   85.92    6.43
  -2 -11  -4   91.46    7.96
  -2 -11  -4   79.40    8.01
  -2 -11  -5  132.04    9.52
  -2  11  -5  114.14    8.25
  -2  11  -5  131.33    8.82
  -2 -11  -5  114.28   10.28
  -2 -11  -6  402.37   22.09
  -2  11  -6  381.03   21.39
  -2 -11  -7    8.62    3.41
  -2 -11  -7    5.04    3.40
  -2  11  -7    8.27    1.88
  -2 -11  -8  120.40    8.93
  -2 -11  -8  123.07    8.90
  -2 -11  -9  167.16   10.81
  -2  11  -9  180.65   10.64
  -2 -11  -9  165.70   10.67
  -2 -12  10  240.44   13.97
   2  12  -9   50.92    4.64
  -2 -12   9   61.46    5.05
  -2 -12   8    4.42    2.65
   2  12  -8    9.44    2.34
  -2 -12   8    9.60    2.59
  -2 -12   7  132.35    9.45
  -2  12   7  115.83    8.05
   2  12  -7  116.59    8.72
  -2 -12   6  158.85   11.43
   2  12  -6  139.10   10.07
  -2  12   6  139.67    9.50
  -2  12   5  645.90   35.01
  -2 -12   5  622.87   36.76
  -2  12   5  609.41   34.95
  -2  12   4   36.31    3.92
  -2  12   4   37.13    3.99
  -2 -12   3   14.05    3.53
  -2  12   3   13.11    2.62
  -2 -12   2    2.41    2.45
  -2  12   2    1.48    2.19
  -2  12   2    0.78    2.35
  -2  12   1  217.22   14.20
  -2  12   1  252.11   14.53
  -2  12   0   17.57    2.96
  -2  12   0   12.55    2.59
  -2  12  -1  327.89   18.33
  -2  12  -1  289.97   18.10
  -2  12  -2    0.49    1.94
  -2 -12  -2    0.48    5.94
  -2 -12  -2   -0.35    2.94
  -2 -12  -3   11.75    3.75
  -2 -12  -3   13.40    5.26
  -2  12  -3   13.13    2.61
  -2  12  -4   22.87    3.08
  -2 -12  -4   27.09    4.98
  -2 -12  -4   20.25    4.15
  -2 -12  -5  245.15   14.69
  -2 -12  -5  213.34   15.25
  -2  12  -5  225.55   13.75
  -2  12  -6   16.95    2.38
  -2 -12  -6   11.74    3.72
  -2 -12  -7   12.09    2.88
  -2 -12  -7   16.56    3.44
  -2 -12  -8    0.23    1.71
  -2  12  -8    1.96    1.30
  -2 -12  -8    1.10    2.00
   2 -12   8    2.07    1.61
   2  13  -8    3.80    1.69
   2  13  -7    5.04    1.80
  -2 -13   6   22.46    4.08
   2  13  -6   23.51    3.18
  -2  13   5   11.54    2.70
  -2 -13   5   14.09    3.65
   2  13  -5   12.43    2.71
  -2  13   4   14.75    2.56
  -2  13   4   16.96    2.89
  -2 -13   4    9.84    3.36
  -2  13   3  285.74   17.50
  -2  13   3  314.27   17.80
  -2  13   2   13.21    2.75
  -2  13   2   15.99    3.05
  -2  13   1  359.66   19.75
  -2  13   1  315.86   19.60
  -2  13   0    1.60    2.07
  -2  13   0    0.46    1.99
  -2  13  -1  347.55   19.57
  -2  13  -1  323.17   19.41
  -2  13  -2    4.25    2.06
  -2  13  -3  261.98   16.08
  -2 -13  -3  270.57   17.08
  -2 -13  -3  299.59   17.78
  -2  13  -4    2.39    1.67
  -2 -13  -4    2.03    2.92
  -2 -13  -4   -1.14    3.82
  -2 -13  -5    5.86    3.03
  -2 -13  -5    6.21    3.42
  -2  13  -5   10.13    1.88
   2 -13   5   14.68    2.73
  -2  13  -6   20.16    2.25
  -2 -13  -6   17.01    3.55
   2 -13   6   16.92    2.66
  -2 -13  -7   38.72    4.11
   2 -13   7   46.66    3.75
  -2  14   7   32.92    2.86
   2  14  -7   27.81    2.84
   2 -14  -6   17.87    2.98
   2  14  -6   18.36    2.59
  -2  14   6   21.06    2.50
  -2  14   5  431.48   23.04
   2  14  -5  382.36   23.25
  -2  14   4    3.20    1.86
   2  14  -4    2.39    1.72
  -2  14   3   26.63    3.04
  -2  14   3   32.25    3.37
  -2  14   2    2.67    1.76
  -2  14   2    1.60    1.97
  -2  14   1  242.14   14.90
  -2  14   1  266.55   15.12
  -2  14   0    8.22    2.12
  -2  14   0    8.93    2.21
  -2  14  -1  166.16   10.37
  -2  14  -2    2.96    1.68
  -2  14  -3    0.86    1.70
  -2 -14  -3    0.82    3.84
  -2 -14  -4   -0.25    2.42
  -2  14  -5  335.25   18.31
  -2 -14  -5  316.21   19.18
  -2  15   4    6.05    1.71
   2 -15  -4    0.16    2.52
  -2  15   3  123.26    7.76
  -2  15   2   58.93    4.30
  -2  15   2   56.28    4.42
  -2  15   1  101.28    6.40
  -2  15   1   91.23    6.34
  -2  15   0   18.22    2.16
  -2  15   0    9.76    1.94
  -2  15  -1   61.81    4.52
  -2  15  -2   50.48    3.86
  -2  15  -3  103.52    6.39
  -3   0  15  620.54   34.23
   3   0 -14    0.85    1.48
   3   0 -14    2.92    1.80
   3   0 -13  916.59   50.58
   3   0 -12   -0.32    2.08
  -3   0  12   -0.58    1.94
   3   0 -11    8.91    2.72
  -3   0  11    7.33    2.37
   3   0 -10    0.32    2.29
  -3   0  10    2.10    2.16
   3   0  -9  404.93   23.31
  -3   0   9  369.91   27.42
  -3   0   9  393.29   23.08
  -3   0   8   -0.83    2.76
  -3   0   7  719.70   43.44
  -3   0   6   -1.69    2.28
  -3   0   5  152.56   11.27
  -3   0   4   -0.36    1.82
  -3   0   3  363.29   21.62
   3   0  -2    0.87    1.92
  -3   0   2    2.35    2.17
  -3   0   1  564.27   31.60
   3   0  -1  523.44   30.99
  -3   0   1  550.13   31.21
  -3   0   1  559.20   31.26
  -3   0   0   -1.32    2.50
  -3   0   0   -1.36    1.88
  -3   0   0    1.41    2.03
  -3   0  -1    1.42    2.39
  -3   0  -1   -1.34    1.88
  -3   0  -1   -0.29    1.66
  -3   0  -2    2.73    2.41
  -3   0  -2    0.35    2.25
  -3   0  -2    7.36    2.37
  -3   0  -2   -0.32    1.70
  -3   0  -2   -0.34    2.25
  -3   0  -3    1.46    2.87
  -3   0  -3    3.76    2.46
  -3   0  -3    6.03    2.72
  -3   0  -3    1.98    2.21
  -3   0  -4    3.99    3.08
  -3   0  -4   -0.46    2.35
  -3   0  -4   -0.58    2.20
  -3   0  -4    3.53    3.70
  -3   0  -5  257.22   19.70
  -3   0  -5  280.56   21.43
  -3   0  -6   -1.13    4.71
  -3   0  -6   -4.10    3.56
  -3   0  -7 1000.63   70.19
  -3   0  -7 1148.54   66.66
  -3   0  -7 1308.10   64.64
  -3   0  -7 1146.56   65.79
  -3   0  -7 1336.49   72.85
  -3   0  -7 1162.26   63.90
  -3   0  -7 1174.40   65.02
  -3   0  -7 1136.36   65.91
  -3   0  -8    0.91    2.99
  -3   0  -8    0.53    2.97
  -3   0  -8    0.29    1.76
  -3   0  -8    0.46    2.97
  -3   0  -8    1.45    2.16
  -3   0  -8    0.43    1.49
  -3   0  -9  236.86   15.13
  -3   0  -9  204.26   13.87
  -3   0  -9  203.30   13.21
  -3   0  -9  225.50   14.56
  -3   0 -10   -1.07    2.30
  -3   0 -10    0.31    1.83
  -3   0 -10   -0.71    2.34
  -3   0 -11 1277.02   67.07
  -3   0 -11 1175.19   67.11
  -3   0 -12   -0.73    1.70
  -3   0 -13   12.28    2.08
   3  -1 -15   53.80    4.58
   3   1 -15   68.96    4.71
  -3  -1  15   70.79    5.02
  -3   1  15   64.24    4.88
   3  -1 -14    4.48    1.91
   3   1 -14    1.96    1.58
   3  -1 -13   16.50    3.00
   3  -1 -13   10.82    2.78
  -3  -1  13   14.89    2.66
   3   1 -13   18.79    2.97
   3  -1 -12   85.59    6.95
   3   1 -12   88.02    7.06
   3  -1 -12   86.29    6.95
  -3  -1  12   83.52    6.83
   3  -1 -11 1054.73   58.41
   3   1 -11 1078.97   58.56
  -3  -1  11 1044.04   58.34
   3  -1 -10   61.98    5.63
   3   1 -10   63.42    5.83
  -3   1  10   59.02    5.43
  -3  -1  10   60.71    5.67
   3  -1  -9  328.44   19.66
   3   1  -9  324.51   19.70
  -3   1   9  324.59   23.68
  -3  -1   9  335.17   24.68
  -3   1   9  353.15   19.58
  -3  -1   9  300.44   19.47
  -3   1   8    2.33    2.50
  -3  -1   8   -0.90    3.32
  -3   1   8    0.92    3.19
  -3   1   7  448.49   30.02
  -3  -1   7  479.31   30.99
  -3   1   7  521.89   32.35
  -3   1   6  639.18   38.34
  -3  -1   6  627.94   38.69
  -3   1   6  688.64   40.89
  -3   1   5   22.55    3.65
  -3  -1   5   21.65    3.84
  -3   1   5   17.11    4.91
  -3  -1   4   77.85    6.68
  -3   1   4   84.81    8.30
  -3   1   4   76.67    6.73
  -3   1   3   91.58    6.97
  -3   1   3   98.43    7.44
  -3  -1   3   97.31    7.19
  -3   1   3   96.19    8.40
  -3   1   2  728.61   42.39
  -3   1   2  782.60   43.49
  -3   1   2  786.67   42.67
   3  -1  -2  790.97   43.34
  -3   1   2  755.50   43.09
  -3  -1   2  819.13   43.26
  -3   1   1  153.86   11.19
  -3  -1   1  201.25   12.06
  -3   1   1  170.72   12.22
  -3   1   1  191.33   12.01
  -3  -1   1  202.98   12.26
   3  -1  -1  172.82   11.85
  -3  -1   1  199.63   12.64
  -3   1   1  208.23   12.07
  -3  -1   0  215.27   12.42
  -3   1   0  167.10   11.36
  -3   1   0  172.93   12.46
  -3   1   0  170.32   11.77
  -3  -1   0  227.86   12.37
   3  -1   0  168.39   11.78
  -3   1   0  170.33   11.80
  -3  -1   0  224.95   12.76
  -3   1  -1    2.79    1.88
  -3   1  -1    4.82    1.82
  -3   1  -1    5.73    2.20
  -3  -1  -1    6.69    2.28
   3  -1   1    4.75    2.25
  -3   1  -1    3.65    2.99
  -3  -1  -1    1.28    2.14
  -3   1  -2   76.08    6.56
  -3   1  -2   73.69    6.14
  -3   1  -2   72.07    6.41
  -3   1  -2   84.30    6.84
  -3  -1  -2   74.28    6.55
  -3   1  -2   77.68    7.68
  -3  -1  -2   77.80    6.50
  -3  -1  -2   72.64    6.61
  -3  -1  -2   72.27    6.53
  -3   1  -3 2379.84  124.06
  -3   1  -3 2230.38  123.86
  -3  -1  -3 2171.96  124.48
  -3  -1  -3 2337.21  124.79
  -3  -1  -3 2284.66  124.46
  -3   1  -3 2479.93  125.41
  -3  -1  -3 2219.01  124.21
  -3   1  -4    9.37    3.08
  -3  -1  -4    7.15    3.98
  -3  -1  -4    8.10    2.98
  -3   1  -4    9.19    4.68
  -3   1  -4    7.96    3.15
  -3  -1  -4    7.99    3.52
  -3  -1  -5   13.16    5.33
  -3   1  -5   17.30    6.24
  -3  -1  -5   21.09    5.28
  -3   1  -5    9.83    3.54
  -3   1  -5   19.04    4.02
  -3  -1  -6    7.51    5.17
  -3  -1  -6    4.62    4.15
  -3   1  -6    0.89    2.98
  -3   1  -6   -3.49    4.71
  -3  -1  -7  715.85   53.11
  -3  -1  -7  743.64   47.89
  -3  -1  -7  810.45   47.79
  -3   1  -7  871.87   48.04
  -3   1  -7  939.13   49.18
  -3  -1  -7  824.29   48.80
  -3   1  -7  871.68   47.82
  -3   1  -7 1047.77   55.48
  -3  -1  -7  954.26   54.55
  -3  -1  -7  841.87   46.02
  -3   1  -7  798.20   45.85
  -3  -1  -7  833.32   46.99
  -3   1  -7  900.56   47.32
  -3  -1  -8    2.42    3.17
  -3   1  -8    1.02    2.85
  -3  -1  -8    2.17    3.31
  -3  -1  -8    0.58    1.78
  -3   1  -8   -0.30    1.84
  -3   1  -8    0.45    3.15
  -3  -1  -8    3.16    3.08
  -3  -1  -8    1.05    2.40
  -3  -1  -8   -0.22    1.55
  -3   1  -8    1.06    1.65
  -3   1  -8    1.49    2.29
  -3   1  -8    2.52    2.75
  -3   1  -9  108.45    8.64
  -3  -1  -9   92.51    8.32
  -3  -1  -9  119.08    8.84
  -3  -1  -9   84.96    7.23
  -3   1  -9  106.32    7.66
  -3  -1  -9   92.18    6.80
  -3   1  -9   82.43    6.62
  -3  -1  -9   92.57    7.73
  -3   1  -9  107.48    8.14
  -3   1  -9  113.86    8.41
  -3  -1 -10   41.24    4.88
  -3  -1 -10   46.87    4.63
  -3   1 -10   43.54    4.49
  -3   1 -10   42.18    4.86
  -3  -1 -10   43.43    4.83
  -3   1 -10   51.79    5.30
  -3  -1 -11  106.40    7.70
  -3   1 -11   96.14    7.54
  -3  -1 -11  101.37    7.81
  -3   1 -11  111.36    8.06
  -3  -1 -12    4.75    1.94
  -3   1 -12    6.11    2.02
  -3  -1 -13  175.52   10.42
  -3   1 -13  162.57   10.31
   3  -2 -15  117.53    7.43
  -3  -2  15  113.21    7.50
  -3   2  15  112.28    7.47
   3   2 -15  119.79    7.38
   3   2 -14  138.94    8.90
   3  -2 -14  132.10    8.91
  -3  -2  14  134.64    8.85
   3  -2 -13  403.16   21.76
  -3  -2  13  382.69   21.58
   3  -2 -12    1.23    2.29
   3   2 -12    4.39    2.31
   3  -2 -12    3.48    2.42
  -3  -2  12    0.93    1.91
   3  -2 -11   16.58    3.14
   3   2 -11   12.91    3.04
   3  -2 -11   14.52    3.15
  -3  -2  11   14.09    3.06
   3  -2 -10  594.85   34.34
   3   2 -10  583.41   34.47
   3  -2 -10  611.98   34.44
  -3  -2  10  624.70   34.54
   3  -2  -9   85.07    6.50
   3   2  -9   78.83    6.53
  -3   2   9   70.56    8.69
  -3  -2   9   82.17   10.56
   3  -2  -9   56.45    8.25
  -3   2   9   66.45    9.19
  -3  -2   9   73.40    6.31
   3  -2  -8  403.55   27.44
  -3   2   8  421.67   27.31
  -3  -2   8  380.60   28.59
  -3   2   8  433.46   28.86
   3  -2  -7  748.44   44.32
  -3   2   7  712.65   43.44
  -3  -2   7  678.73   44.77
  -3   2   7  814.44   46.49
  -3   2   6  847.87   49.24
  -3  -2   6  808.95   50.02
  -3   2   6  878.44   52.20
  -3   2   6  900.56   51.23
  -3   2   5    2.19    3.84
  -3   2   5    4.47    2.43
  -3  -2   5    4.34    2.62
  -3   2   5    5.85    4.32
  -3   2   4  158.73   11.18
  -3   2   4  180.87   14.00
  -3   2   4  175.70   11.71
  -3   2   4  141.68   13.21
  -3   2   3  464.90   29.24
  -3  -2   3  480.88   27.86
  -3   2   3  461.01   28.77
  -3   2   3  487.06   27.41
   3  -2  -3  481.25   27.53
  -3   2   3  457.04   26.91
  -3  -2   3  444.77   26.99
  -3   2   3  454.28   27.07
   3  -2  -2  494.32   28.51
  -3   2   2  465.32   29.37
  -3   2   2  490.64   28.60
  -3   2   2  479.17   27.87
  -3  -2   2  494.96   28.52
  -3   2   2  512.52   28.11
  -3   2   2  481.83   28.17
  -3  -2   2  469.59   28.11
   3  -2  -2  516.23   28.45
  -3  -2   1  636.05   35.12
  -3   2   1  553.53   35.22
   3  -2  -1  604.79   35.08
  -3   2   1  653.37   34.91
  -3  -2   1  683.13   35.15
   3  -2  -1  585.08   34.75
  -3  -2   1  657.25   35.78
  -3   2   1  585.70   34.51
  -3  -2   0  245.78   15.27
  -3   2   0  221.93   14.53
  -3   2   0  211.15   15.37
  -3   2   0  221.29   14.52
   3  -2   0  234.11   14.99
  -3  -2   0  282.61   15.40
  -3   2   0  221.13   14.44
  -3  -2   0  297.32   15.86
  -3  -2  -1   15.20    3.18
  -3   2  -1   17.06    2.72
  -3   2  -1   16.58    2.90
  -3  -2  -1   17.26    2.97
  -3   2  -1   15.53    4.29
   3  -2   1   16.96    3.00
  -3   2  -2 1820.73   92.06
  -3  -2  -2 1720.74   92.44
   3  -2   2 1721.37   92.46
  -3   2  -2 1674.07   92.38
  -3  -2  -2 1551.53   92.19
  -3  -2  -2 1694.74   92.81
  -3   2  -3  262.30   16.43
  -3  -2  -3  262.19   16.98
  -3   2  -3  254.23   16.15
  -3  -2  -3  229.59   16.87
  -3  -2  -3  259.53   17.00
  -3   2  -4   72.68    9.64
  -3   2  -4   90.96    7.71
  -3  -2  -4   89.27    9.23
  -3   2  -4   79.82    7.58
  -3  -2  -4   96.70    9.18
  -3  -2  -4   88.58    8.94
  -3  -2  -5    2.81    3.58
  -3  -2  -5    0.81    3.97
  -3   2  -5    1.04    4.72
  -3  -2  -6  441.06   33.73
  -3   2  -6  479.95   33.83
  -3  -2  -6  509.40   33.57
  -3   2  -7  675.81   40.38
  -3  -2  -7  528.93   39.90
  -3  -2  -7  535.35   33.31
   3  -2   7  529.08   38.49
  -3   2  -7  717.17   34.98
  -3  -2  -7  554.60   34.40
  -3  -2  -7  556.13   31.70
  -3   2  -7  609.02   33.73
  -3  -2  -7  584.25   38.65
  -3   2  -7  600.41   32.93
  -3  -2  -7  458.49   33.26
  -3  -2  -8    3.45    3.58
  -3  -2  -8   -1.07    2.91
  -3   2  -8    3.50    3.28
  -3  -2  -8    4.80    3.17
  -3   2  -8    4.49    1.80
  -3  -2  -8    2.35    2.21
  -3   2  -8    7.54    2.69
  -3   2  -8    5.70    2.78
  -3   2  -9   53.62    5.56
  -3  -2  -9   43.27    5.53
  -3  -2  -9   33.11    4.83
  -3   2  -9   35.06    4.17
  -3   2  -9   32.19    3.59
  -3   2  -9   38.59    4.69
  -3  -2  -9   42.62    4.65
  -3   2  -9   43.16    5.00
  -3   2 -10   47.51    4.62
  -3   2 -10   46.39    4.88
  -3  -2 -10   31.93    4.25
  -3   2 -10   40.94    4.53
  -3  -2 -11  481.87   27.80
  -3   2 -11  511.10   28.09
  -3   2 -11  465.26   28.01
  -3   2 -12   31.65    3.40
  -3  -2 -12   26.33    3.15
  -3   2 -13   17.97    2.30
   3  -3 -15   26.65    2.67
  -3  -3  15   24.01    2.50
   3   3 -15   23.23    2.43
   3   3 -14    5.07    1.70
   3  -3 -14    3.88    1.77
  -3  -3  14    0.64    1.56
   3  -3 -13   14.32    2.86
  -3  -3  13   14.07    2.68
   3  -3 -12  130.84    8.99
   3  -3 -12  131.20    9.12
  -3  -3  12  107.22    8.62
   3  -3 -11  118.92    9.03
   3   3 -11  142.25    9.48
   3  -3 -11  114.53    9.08
  -3  -3  11  126.25    9.21
   3  -3 -10    5.98    2.55
   3   3 -10    4.42    2.65
   3  -3 -10    7.99    2.91
  -3  -3  10    5.14    2.24
   3   3  -9    0.32    2.22
   3  -3  -9    0.31    2.11
   3  -3  -9   -0.91    2.01
  -3  -3   9    1.34    2.24
   3  -3  -9    3.60    3.73
   3  -3  -8  163.00   10.00
   3  -3  -8  119.92    9.32
  -3   3   8  147.54   12.54
  -3   3   8  159.96   14.39
   3  -3  -8  122.72   12.46
   3   3  -8  144.77    9.71
   3  -3  -7    1.51    2.71
  -3   3   7   -2.47    3.57
  -3  -3   7    3.74    2.69
  -3   3   7    1.26    2.33
  -3   3   7    3.91    3.85
  -3   3   6 1847.27  102.08
   3  -3  -6 1965.31  101.31
  -3  -3   6 1805.48  100.97
  -3   3   6 1715.31   99.62
  -3   3   6 1758.75  103.08
   3  -3  -5    6.89    3.29
  -3  -3   5    6.64    3.32
  -3   3   5    8.05    4.36
  -3   3   5    3.22    2.06
  -3   3   5    6.62    4.21
  -3   3   4  607.60   34.71
  -3   3   4  621.50   37.98
   3  -3  -4  656.48   35.72
  -3   3   4  495.48   37.19
  -3  -3   4  590.42   35.61
  -3   3   3  383.56   23.08
  -3   3   3  366.78   25.79
  -3  -3   3  409.12   24.02
  -3   3   3  338.90   25.12
  -3   3   3  391.23   23.34
   3  -3  -3  408.51   23.62
   3  -3  -3  416.59   23.67
  -3  -3   3  361.76   22.74
  -3   3   2 3831.36  206.33
  -3   3   2 3775.79  206.16
  -3  -3   2 3823.05  206.86
  -3   3   2 3971.43  206.86
  -3  -3   2 3814.62  206.11
   3  -3  -2 4078.86  206.85
   3  -3  -2 3761.84  206.71
  -3  -3   2 3943.91  206.67
  -3   3   1   48.65    4.98
  -3  -3   1   50.94    5.28
  -3   3   1   54.65    5.85
   3  -3  -1   61.19    5.56
   3  -3  -1   50.43    5.15
  -3  -3   1   66.54    5.29
  -3  -3   1   51.19    5.44
  -3  -3   0  718.33   41.56
  -3   3   0  722.56   41.44
  -3  -3   0  721.95   41.20
   3  -3   0  824.63   42.21
  -3   3   0  734.29   41.30
   3  -3   0  712.49   41.55
  -3  -3   0  768.81   42.03
  -3   3  -1  370.80   21.56
  -3  -3  -1  347.68   21.58
   3  -3   1  356.87   22.06
   3  -3   1  355.98   21.78
  -3   3  -1  378.46   21.54
  -3   3  -2  178.02   12.33
  -3   3  -2  196.53   12.47
   3  -3   2  187.32   13.05
  -3  -3  -2  183.90   12.65
  -3  -3  -3  111.20    9.62
  -3   3  -3   93.02   12.08
  -3   3  -3  147.16    9.77
   3  -3   3  128.81   10.13
  -3  -3  -3  111.38   10.01
  -3   3  -4    2.37    2.28
  -3  -3  -4    4.02    2.98
  -3  -3  -4    3.64    3.31
   3  -3   4    0.60    2.81
  -3  -3  -5    4.56    3.54
  -3   3  -5   11.15    3.37
  -3  -3  -5    2.85    4.05
  -3  -3  -6  311.43   27.94
  -3   3  -6  414.78   22.68
  -3  -3  -6  358.82   27.07
  -3   3  -6  378.69   21.63
  -3   3  -6  383.92   21.64
   3  -3   7  235.12   20.91
  -3   3  -7  225.84   13.60
  -3   3  -7  263.47   16.04
  -3   3  -7  219.82   13.62
  -3   3  -7  249.41   15.06
  -3  -3  -7  204.94   19.24
  -3   3  -8    4.16    2.56
  -3  -3  -9   15.57    3.36
  -3   3  -9   18.42    3.08
  -3   3  -9   13.07    2.38
  -3   3  -9   15.06    3.32
  -3   3 -10  102.51    7.70
  -3   3 -10   97.37    7.90
  -3   3 -11   11.09    2.37
  -3   3 -11   10.94    2.62
  -3   3 -12  118.91    8.06
  -3   3 -13    5.78    1.51
   3  -4 -14   86.41    6.48
   3   4 -14   92.25    6.31
  -3  -4  14   93.04    6.44
   3  -4 -13   62.67    5.41
  -3  -4  13   60.61    5.26
   3  -4 -12  114.31    8.31
  -3  -4  12  103.02    8.04
   3  -4 -11  120.67    9.03
   3  -4 -11  126.66    9.29
  -3  -4  11  128.83    9.32
   3  -4 -10  603.61   33.65
   3  -4 -10  576.42   33.42
  -3  -4  10  573.01   33.62
   3  -4  -9   70.43    6.17
   3   4  -9   70.70    6.23
   3  -4  -9   66.86    6.09
   3  -4  -8  232.26   19.30
   3  -4  -8  256.91   15.41
  -3   4   8  200.55   19.25
  -3   4   8  239.83   19.32
   3   4  -8  286.16   15.80
   3   4  -8  223.10   15.13
  -3   4   7  112.29   11.60
   3  -4  -7  106.93   10.96
  -3   4   7  106.64   11.93
  -3   4   6  467.23   30.40
  -3   4   6  481.92   32.61
   3  -4  -6  542.92   32.35
  -3   4   6  511.54   30.64
  -3  -4   6  486.52   31.77
  -3   4   6  508.77   34.24
  -3   4   5   22.76    4.15
   3  -4  -5   28.26    4.94
  -3   4   5   30.84    6.28
  -3   4   5   36.61    7.27
  -3  -4   5   26.30    4.86
  -3   4   4  450.85   28.15
   3  -4  -4  473.12   29.01
  -3  -4   4  482.64   29.39
  -3   4   4  430.49   31.84
  -3   4   4  520.38   32.20
   3  -4  -4  477.37   28.46
  -3  -4   3    8.09    3.10
  -3   4   3    8.24    2.45
   3  -4  -3    8.20    2.72
  -3   4   3    9.93    5.63
   3  -4  -3    6.30    2.77
  -3   4   2  252.13   16.23
  -3  -4   2  232.09   16.67
  -3   4   2  245.88   16.70
   3  -4  -2  263.07   16.74
   3  -4  -2  256.42   16.72
  -3  -4   2  259.30   16.54
  -3   4   2  278.84   16.55
  -3  -4   1   93.07    8.34
  -3   4   1  103.79    8.86
  -3   4   1  114.44    8.30
   3  -4  -1  100.42    8.47
   3  -4  -1  115.54    8.68
  -3  -4   1  106.28    8.46
  -3   4   0    7.75    2.39
   3  -4   0    8.60    2.51
   3  -4   0    7.41    2.61
  -3   4  -1   31.23    3.86
  -3   4  -1   33.67    4.10
  -3   4  -1   26.25    6.04
   3  -4   1   27.64    4.21
   3  -4   1   33.06    4.37
  -3   4  -2 3118.73  162.20
  -3  -4  -2 2887.91  162.70
   3  -4   2 3037.62  163.19
   3  -4   2 2939.76  162.57
  -3   4  -2 3033.71  166.73
  -3   4  -2 3080.70  162.21
  -3   4  -3  202.93   13.71
  -3  -4  -3  197.27   14.68
  -3   4  -3  206.21   13.72
  -3   4  -3  150.54   16.62
   3  -4   3  199.55   14.64
  -3   4  -4    3.13    2.22
  -3   4  -4    4.03    2.24
  -3  -4  -4    1.32    2.68
  -3  -4  -4    7.93    4.10
   3  -4   4    1.33    2.97
  -3   4  -5  194.03   13.44
  -3   4  -5  163.92   12.68
  -3  -4  -5  155.14   14.40
   3  -4   5  126.17   13.05
  -3  -4  -6  629.28   43.65
  -3   4  -6  717.65   37.53
  -3   4  -6  634.77   36.24
  -3   4  -6  658.14   36.26
  -3   4  -7  101.06    8.24
  -3   4  -7  115.83    7.54
  -3   4  -8  119.50    8.94
  -3   4  -9  101.78    8.19
  -3   4  -9  111.63    8.20
  -3   4  -9  108.60    7.49
  -3   4 -10    9.66    2.37
  -3   4 -11    5.39    1.92
  -3   4 -12    3.77    1.70
  -3   4 -13   66.88    4.67
   3  -5 -14   -0.55    1.58
   3   5 -14   -0.79    1.27
  -3  -5  14    0.73    1.39
   3  -5 -13    0.50    1.89
  -3  -5  13    0.74    1.73
   3  -5 -12  253.02   15.20
  -3  -5  12  227.54   14.92
   3  -5 -11   88.69    7.23
  -3  -5  11   78.81    6.90
   3  -5 -10   -1.29    2.41
   3  -5 -10   -0.70    2.52
  -3  -5  10    6.76    2.76
   3  -5  -9   73.33    6.62
   3   5  -9   77.06    6.75
  -3   5   8  418.17   28.30
   3  -5  -8  400.30   29.39
   3  -5  -8  399.86   24.68
   3   5  -8  456.09   25.07
  -3   5   7  250.80   20.29
  -3   5   7  263.77   19.03
   3  -5  -7  248.20   20.02
   3  -5  -7  262.32   15.96
  -3   5   7  243.16   21.05
   3   5  -7  279.55   16.27
   3  -5  -7  245.15   15.94
  -3   5   6  608.54   38.91
  -3   5   6  577.70   36.50
   3  -5  -6  602.69   38.12
  -3  -5   6  542.36   37.50
  -3   5   5  605.86   36.53
  -3   5   5  503.43   32.68
   3  -5  -5  522.77   33.91
  -3  -5   5  531.97   34.22
  -3   5   5  637.57   38.33
  -3   5   4    4.94    5.02
  -3  -5   4    3.91    3.08
   3  -5  -4    2.50    1.97
  -3   5   4    0.49    2.02
  -3   5   3  192.31   13.19
  -3  -5   3  191.17   14.14
   3  -5  -3  179.56   13.26
   3  -5  -3  182.45   13.59
  -3   5   2 2043.83  112.04
  -3  -5   2 1924.53  112.71
  -3   5   2 2060.17  112.59
   3  -5  -2 2112.68  112.61
   3  -5  -2 2181.97  112.89
  -3   5   1  619.52   36.61
  -3   5   1  634.97   36.84
   3  -5  -1  658.88   37.42
   3  -5  -1  642.26   37.37
  -3   5   0   20.13    3.35
   3  -5   0   14.94    3.41
   3  -5   0   23.06    4.02
  -3   5  -1   87.98    7.40
  -3   5  -1   84.31    7.40
  -3   5  -1  101.23   10.25
   3  -5   1   90.34    7.95
   3  -5   1   65.43    7.26
  -3   5  -2  119.48    8.77
  -3   5  -2   78.56   10.77
  -3  -5  -2  101.22    8.91
   3  -5   2   99.32    9.01
   3  -5   2   92.30    8.77
  -3   5  -2   96.80    8.33
  -3   5  -3  178.88   13.00
  -3   5  -3  181.40   13.08
  -3  -5  -3  172.04   14.13
  -3   5  -3  144.62   16.30
   3  -5   3  169.92   13.66
   3  -5   3  194.39   13.99
  -3   5  -4   82.07   12.46
   3  -5   4   90.05    9.94
  -3  -5  -4  111.56   11.51
  -3   5  -4  106.40    9.53
  -3   5  -5   37.21    5.32
  -3   5  -5   25.61    4.75
  -3   5  -5   30.12    3.74
   3  -5   5   22.89    5.49
  -3   5  -5   21.69    2.72
  -3   5  -5   23.38    2.87
  -3   5  -6  432.14   25.00
  -3   5  -6  414.49   23.78
  -3   5  -7   66.42    5.17
  -3   5  -7   61.69    5.93
  -3   5  -8   38.32    4.53
  -3   5  -8   34.03    3.59
  -3   5  -9    3.50    1.99
  -3   5  -9    3.74    2.28
  -3   5 -10  185.94   11.78
  -3   5 -10  192.90   11.96
  -3   5 -10  160.03   11.56
  -3   5 -11    9.63    2.07
  -3   5 -11    5.37    1.75
  -3   5 -11    6.93    2.02
  -3   5 -12  427.85   24.05
  -3  -6  14    8.03    2.03
  -3  -6  14    9.53    1.67
   3  -6 -13  242.45   14.43
  -3  -6  13  231.90   14.23
   3  -6 -12  607.22   33.34
  -3  -6  12  566.29   33.11
   3  -6 -11   62.26    5.85
  -3  -6  11   60.76    5.77
   3  -6 -10   82.07    7.00
  -3  -6  10   74.19    6.91
   3  -6  -9  197.79   14.04
  -3  -6   9  200.05   16.11
   3  -6  -8    2.66    2.68
  -3  -6   8   -0.58    4.41
   3   6  -8    1.05    2.18
  -3   6   7   85.65    9.46
   3  -6  -7   96.96    7.60
   3   6  -7  108.30    7.85
   3  -6  -7   90.08    7.67
  -3  -6   7  101.72    9.36
  -3   6   6  264.18   19.61
   3  -6  -6  283.49   17.21
  -3  -6   6  302.51   17.99
  -3   6   6  302.67   23.58
  -3  -6   6  256.03   20.93
  -3   6   6  308.48   22.72
   3   6  -6  283.52   17.34
   3  -6  -6  274.58   17.61
  -3   6   5   58.08    6.97
  -3   6   5   77.23    9.80
  -3  -6   5   59.50    7.99
  -3   6   5   60.83    9.65
  -3   6   4  127.28   13.39
  -3   6   4  131.49   10.37
   3  -6  -4  138.60   11.12
  -3   6   3  113.33    9.78
   3  -6  -3  129.42   10.63
  -3   6   2  288.73   18.18
   3  -6  -2  266.54   18.25
   3  -6  -2  263.06   18.50
  -3   6   2  271.72   17.93
  -3   6   1   23.45    3.88
  -3   6   1   25.83    4.10
   3  -6  -1   19.69    3.96
   3  -6  -1   21.17    4.23
  -3   6   0    6.21    2.43
  -3   6   0   10.36    3.01
  -3   6   0    6.73    3.63
   3  -6   0   13.27    3.67
   3  -6   0    5.41    2.78
  -3   6  -1   -0.89    3.80
  -3   6  -1    3.25    2.12
  -3   6  -1   11.46    3.01
  -3  -6  -1    5.09    3.07
   3  -6   1    2.81    2.56
   3  -6   1    5.04    2.85
  -3   6  -2  686.11   41.66
  -3   6  -2  726.82   41.92
  -3   6  -2  675.81   45.69
   3  -6   2  736.91   42.79
   3  -6   2  749.46   42.77
  -3   6  -3   76.64    7.49
  -3   6  -3   65.33    7.07
  -3   6  -3   47.41    9.47
   3  -6   3   60.85    7.64
   3  -6   3   73.31    8.01
  -3   6  -4  255.06   17.71
  -3   6  -4  252.26   17.64
  -3   6  -4  234.82   21.49
  -3   6  -4  259.98   15.38
   3  -6   4  199.33   17.80
  -3  -6  -4  217.16   15.04
  -3   6  -4  251.25   14.66
   3  -6   4  280.20   19.00
  -3   6  -5   47.77    6.65
  -3   6  -5   48.34    4.59
  -3   6  -5   59.04    5.28
  -3   6  -5   48.21    4.26
  -3   6  -5   60.08    7.13
  -3   6  -6    4.67    2.51
  -3   6  -6    7.25    2.11
  -3   6  -7  353.65   20.86
  -3   6  -7  376.25   22.17
  -3   6  -8  738.85   41.41
  -3   6  -8  723.01   40.23
  -3   6  -9  202.76   13.43
  -3   6  -9  214.84   13.70
  -3   6 -10   63.78    5.27
  -3   6 -10   49.15    4.82
  -3   6 -10   57.55    5.03
  -3   6 -11  419.78   24.00
  -3   6 -11  425.55   24.07
  -3   6 -11  419.97   24.01
  -3   6 -12   25.55    2.56
  -3   6 -12   24.98    2.52
  -3  -7  13    1.20    2.10
  -3  -7  13    0.19    1.40
  -3  -7  12  127.43    8.76
   3  -7 -11  687.91   40.61
  -3  -7  11  762.36   40.87
  -3  -7  10   73.15    8.07
   3  -7 -10   75.98    6.78
   3   7  -9   45.02    5.11
   3  -7  -9   53.35    5.50
  -3  -7   9   40.18    7.17
   3  -7  -8  634.85   32.93
   3   7  -8  565.18   32.71
   3  -7  -7  134.22   10.48
   3  -7  -7  156.93   10.86
  -3  -7   7  141.28   11.93
  -3  -7   6   14.30    3.46
  -3   7   6   11.42    3.54
   3   7  -6    8.31    2.50
   3  -7  -6    6.06    3.26
  -3  -7   5    2.09    2.60
  -3   7   5   -0.65    2.25
  -3  -7   5   -0.41    3.16
   3  -7  -5    2.50    3.16
  -3   7   5    3.22    4.34
  -3  -7   4  221.97   15.01
   3  -7  -4  217.69   15.11
   3  -7  -4  242.03   17.87
  -3  -7   4  244.45   14.56
  -3   7   3  238.54   16.42
   3  -7  -3  219.58   16.85
  -3   7   2   38.43    5.22
  -3   7   2   34.58    5.15
   3  -7  -2   31.33    5.32
  -3   7   1  109.12    8.94
   3  -7  -1   88.94    8.71
   3  -7  -1   84.19    8.85
  -3   7   1   86.04    8.39
  -3   7   0  222.35   16.52
  -3   7   0  240.24   16.47
  -3  -7   0  215.91   17.24
  -3   7   0  264.70   19.01
  -3   7   0  247.64   16.61
   3  -7   0  245.28   17.22
   3  -7   0  249.49   17.43
  -3   7  -1   49.49    6.05
  -3  -7  -1   58.50    7.35
  -3   7  -1   62.80    8.63
   3  -7   1   39.34    6.16
   3  -7   1   58.54    6.97
  -3   7  -1   53.64    6.11
  -3   7  -2  121.61   10.49
  -3   7  -2  115.04   10.44
  -3   7  -2  112.68   13.18
   3  -7   2  103.30   10.67
  -3  -7  -2  129.72    9.11
   3  -7   2  152.67   12.14
  -3   7  -3  956.54   55.36
  -3   7  -3  930.44   55.22
  -3   7  -3  981.74   60.10
  -3   7  -3  918.52   52.61
   3  -7   3  938.59   56.29
  -3  -7  -3  911.76   52.69
  -3  -7  -3 1040.91   53.57
   3  -7   3 1015.78   56.70
  -3   7  -4  305.51   21.36
  -3   7  -4  310.88   21.35
  -3   7  -4  319.92   18.77
  -3  -7  -4  285.76   18.52
  -3  -7  -4  343.65   20.17
  -3   7  -4  285.37   17.90
  -3   7  -5   82.73    6.37
  -3   7  -5   79.09    6.89
  -3  -7  -5   82.65    7.26
  -3   7  -5   79.39    5.94
  -3   7  -6  217.74   13.90
  -3   7  -6  200.96   12.59
  -3   7  -6  201.55   12.96
  -3   7  -7  209.00   13.71
  -3   7  -7  201.19   12.61
  -3   7  -8   12.89    3.06
  -3   7  -8   19.31    2.78
  -3   7  -9   12.59    2.65
  -3   7  -9   11.57    2.74
  -3   7 -10   -1.27    1.47
  -3   7 -10    0.24    1.57
  -3   7 -11   23.08    2.77
  -3   7 -11   26.54    2.80
  -3  -8  13   87.09    5.85
   3  -8 -13   80.03    5.68
  -3  -8  12  275.88   16.54
  -3  -8  11   24.76    4.06
  -3  -8  10  159.51   12.16
  -3  -8   9    5.52    5.07
   3   8  -9    1.86    2.27
  -3  -8   8   63.48    7.92
   3   8  -8   68.42    6.25
   3  -8  -8   57.76    5.85
   3   8  -7  871.23   52.53
   3  -8  -7 1005.04   52.82
  -3  -8   7  972.33   53.96
  -3  -8   6   10.22    3.78
  -3  -8   6    7.59    4.37
   3   8  -6   12.71    3.11
   3  -8  -6   13.39    3.68
  -3  -8   5   38.50    4.70
  -3  -8   5   30.11    5.50
   3  -8  -5   38.66    5.07
  -3  -8   4    1.62    2.30
  -3   8   4    6.68    3.10
  -3  -8   4    0.79    2.99
   3  -8  -4   -3.55    3.50
  -3  -8   3  431.10   24.70
  -3   8   3  463.54   27.43
  -3   8   3  427.65   23.78
   3  -8  -3  384.81   24.55
   3  -8  -3  466.25   28.39
  -3  -8   3  399.77   23.95
  -3   8   2   -2.36    3.10
  -3  -8   2    6.43    2.40
  -3  -8   2    2.28    2.00
  -3  -8   2    0.22    1.82
  -3   8   2    2.31    1.83
   3  -8  -2    1.45    2.76
  -3   8   1  765.07   43.04
  -3   8   1  828.91   46.37
  -3  -8   1  783.22   47.85
  -3  -8   1  759.62   43.70
   3  -8  -1  854.02   47.74
  -3  -8   1  813.71   43.42
  -3   8   0   77.07    8.30
  -3  -8   0   83.93    9.66
  -3   8   0   78.45    5.99
  -3  -8   0   93.73    6.87
   3  -8   0   90.25    9.28
  -3   8  -1   64.03    6.95
  -3   8  -1   44.51    6.53
  -3  -8  -1   52.59    7.82
  -3   8  -1   67.51    9.21
  -3  -8  -1   58.18    5.63
   3  -8   1   57.97    7.29
   3  -8   1   56.00    7.37
  -3  -8  -2    8.80    2.81
  -3   8  -2    7.11    2.96
  -3   8  -2    1.96    2.99
  -3   8  -2    6.84    5.29
  -3  -8  -2    3.79    4.65
  -3  -8  -2   10.13    3.35
   3  -8   2   11.54    4.05
   3  -8   2    3.97    3.23
  -3   8  -3  134.73    8.78
  -3   8  -3  117.48   11.16
  -3  -8  -3  116.05    9.91
  -3  -8  -3  122.76   10.05
  -3   8  -4  265.59   16.06
  -3   8  -4  262.99   16.63
  -3  -8  -4  251.06   16.68
  -3  -8  -4  273.80   18.12
  -3   8  -5   72.25    5.77
  -3   8  -5   70.54    6.27
  -3  -8  -5   55.99    6.36
  -3  -8  -5   53.72    7.48
  -3   8  -6   42.17    4.59
  -3   8  -6   49.62    5.32
  -3   8  -6   56.03    4.57
  -3   8  -7  362.98   22.32
  -3   8  -7  373.66   21.35
  -3  -8  -8  330.05   19.84
  -3   8  -8  312.94   19.19
  -3   8  -8  303.29   18.14
  -3  -8  -9    0.88    1.91
  -3   8  -9    0.55    1.64
  -3   8  -9    0.29    2.02
  -3   8 -10  138.65    8.65
  -3   8 -10  116.91    8.28
  -3   8 -11  218.41   13.10
  -3   8 -11  228.39   13.10
  -3  -9  12    3.73    1.85
  -3  -9  12    1.58    1.95
   3  -9 -12    4.43    1.81
  -3   9  12    0.90    1.32
   3  -9 -11  448.60   23.88
  -3  -9  11  419.16   24.15
  -3   9  11  389.13   23.24
  -3  -9  10   36.79    5.13
  -3  -9   9   16.07    5.27
   3   9  -9   21.17    3.43
  -3  -9   8   58.02    7.59
   3   9  -8   78.86    6.59
   3  -9  -8   64.64    6.24
  -3  -9   7   10.34    4.57
   3   9  -7   13.75    3.08
   3  -9  -7   12.73    3.68
  -3   9   6  325.17   17.95
  -3  -9   6  258.19   19.85
   3   9  -6  285.15   18.38
   3  -9  -6  305.36   18.87
  -3  -9   6  285.04   18.86
   3  -9  -5  273.50   17.30
  -3  -9   5  285.94   16.86
  -3   9   5  264.04   15.90
  -3  -9   4  156.26   12.17
   3  -9  -4  157.68   11.78
  -3  -9   4  184.40   11.35
  -3   9   4  163.41   10.70
  -3  -9   3 1002.81   54.97
   3  -9  -3  908.07   54.60
  -3  -9   3  977.96   54.18
  -3   9   3 1049.27   54.01
  -3  -9   2  164.22   11.27
  -3  -9   2  164.49   11.17
  -3  -9   2  175.01   11.01
  -3   9   2  173.13   10.77
  -3   9   1   12.49    2.46
  -3  -9   1   17.23    3.28
  -3   9   0  104.69    7.28
  -3  -9   0  106.82    8.15
  -3   9  -1  739.73   39.79
  -3  -9  -1  693.75   40.73
  -3   9  -2   65.60    5.48
  -3  -9  -2   62.22    6.45
  -3  -9  -2   52.65    7.84
  -3  -9  -3  429.65   25.05
  -3   9  -3  348.14   22.85
  -3  -9  -3  445.30   24.63
  -3  -9  -3  402.97   24.72
  -3  -9  -4   33.53    5.85
  -3   9  -4   26.97    3.56
  -3  -9  -4   20.83    4.96
  -3  -9  -4   23.18    5.39
  -3   9  -5   48.82    4.69
  -3  -9  -5   31.55    6.23
  -3  -9  -5   46.63    5.74
  -3  -9  -5   34.54    6.51
  -3   9  -6    8.80    2.41
  -3  -9  -6    8.58    4.20
  -3   9  -6   10.63    2.73
  -3  -9  -6    2.73    4.29
  -3   9  -6    9.46    2.27
  -3   9  -7  431.05   27.42
  -3   9  -7  477.89   26.73
  -3  -9  -8   -0.37    2.42
  -3   9  -8    1.49    1.85
  -3   9  -8   -0.57    1.54
  -3  -9  -9   10.46    2.41
  -3   9  -9    7.36    2.01
  -3   9  -9    6.71    2.01
  -3   9 -10    5.09    1.56
  -3  -9 -10    4.91    1.60
  -3   9 -10    5.90    1.57
   3 -10 -11  123.11    8.04
  -3 -10  11  123.86    8.21
  -3  10  11  117.04    7.54
  -3  10  10   80.35    6.05
   3 -10 -10   86.80    6.56
  -3 -10  10   94.35    7.35
  -3  10   9   11.97    2.62
  -3 -10   9    9.27    3.83
   3  10  -9   13.55    2.89
  -3  10   8   32.36    4.01
  -3 -10   8   39.05    6.02
   3  10  -8   48.29    4.87
   3 -10  -8   35.79    4.43
  -3 -10   7 1116.86   61.06
   3  10  -7 1039.58   59.54
   3 -10  -7 1011.80   59.56
  -3 -10   7 1032.29   60.27
  -3  10   7 1164.88   58.99
  -3 -10   6    9.85    3.70
  -3 -10   6   11.38    5.16
  -3  10   6   13.89    2.87
   3  10  -6   10.81    2.88
   3 -10  -6   11.26    3.72
  -3  10   5    4.12    2.33
  -3 -10   5    4.02    4.49
  -3 -10   5    1.78    2.80
   3 -10  -5    2.32    3.37
  -3  10   4   18.73    3.16
  -3 -10   4   18.56    4.74
  -3 -10   4   20.51    3.47
   3 -10  -4   21.62    4.18
  -3 -10   3  371.53   22.45
   3 -10  -3  336.97   22.00
  -3 -10   3  385.74   21.72
  -3  10   3  370.43   21.34
  -3  10   2   72.34    5.94
  -3  10   1  349.93   19.75
  -3  10   1  330.21   19.74
  -3 -10   1  331.75   20.38
  -3 -10   0    2.69    2.59
  -3  10   0    1.15    1.83
  -3  10  -1  307.24   17.32
  -3  10  -1  254.94   16.58
  -3 -10  -1  301.19   17.99
  -3  10  -2  126.84    8.92
  -3  10  -2  128.07    8.55
  -3 -10  -2  142.69   12.01
  -3 -10  -2  114.02    9.75
  -3  10  -3  378.04   23.62
  -3 -10  -3  413.61   25.40
  -3 -10  -3  452.30   25.40
  -3  10  -4    5.28    2.37
  -3 -10  -4    2.80    3.45
  -3 -10  -4    4.29    4.43
  -3 -10  -4    2.16    4.23
  -3 -10  -5  176.86   14.29
  -3  10  -5  201.09   11.90
  -3  10  -5  200.34   12.29
  -3 -10  -6   51.01    6.70
  -3 -10  -6   38.30    6.29
  -3  10  -6   53.85    4.46
  -3 -10  -7    4.80    3.25
  -3 -10  -7    5.79    3.37
  -3  10  -7    4.87    1.78
  -3 -10  -8    1.26    2.13
  -3  10  -8    2.93    1.76
  -3  10  -8    1.45    1.38
  -3 -10  -9   91.54    6.25
  -3  10  -9   86.91    6.05
  -3  10  -9   75.27    5.87
  -3 -11  10   -0.45    2.38
  -3  11  10   -0.14    1.50
  -3 -11   9   13.32    3.42
  -3  11   9   12.15    2.38
   3  11  -9    8.65    2.36
   3  11  -8  117.61    8.96
  -3 -11   8  126.20    9.87
  -3  11   8  138.54    8.69
  -3  11   7   10.82    2.63
  -3 -11   7   17.79    4.09
  -3 -11   7   12.89    3.98
   3  11  -7   10.10    2.67
   3 -11  -7    8.94    3.11
  -3 -11   6   58.64    7.38
   3  11  -6   57.39    5.78
   3 -11  -6   64.12    6.41
  -3 -11   6   69.30    6.71
  -3  11   6   66.67    5.59
  -3 -11   5  174.51   14.97
   3 -11  -5  206.92   14.16
  -3 -11   5  212.23   13.89
  -3  11   5  227.75   13.27
  -3 -11   4    8.97    2.94
  -3 -11   4   13.08    4.14
  -3  11   4   15.74    2.95
   3 -11  -4   13.66    3.62
  -3  11   3  680.30   38.58
   3 -11  -3  706.26   39.32
  -3  11   3  693.20   38.51
  -3  11   2  223.57   13.88
  -3 -11   1  164.30   12.14
  -3  11   1  199.59   11.84
  -3  11   0    4.55    2.07
  -3 -11   0    5.86    2.94
  -3  11  -1  452.42   25.34
  -3 -11  -1  429.62   26.33
  -3  11  -2    3.68    2.19
  -3  11  -2    8.28    2.31
  -3 -11  -2   12.52    6.64
  -3 -11  -2    4.98    3.58
  -3 -11  -3   69.16    7.48
  -3 -11  -3   75.17    8.23
  -3  11  -3   61.02    5.64
  -3  11  -4   26.68    3.47
  -3 -11  -4   22.95    5.13
  -3 -11  -4   19.06    5.04
  -3  11  -5   17.34    2.75
  -3 -11  -5   14.93    4.10
  -3 -11  -5   16.37    4.74
  -3  11  -5   13.90    2.40
  -3 -11  -6  101.34    9.48
  -3 -11  -6   99.05    9.47
  -3 -11  -7  116.49    8.77
  -3 -11  -7  105.93    8.51
  -3  11  -7  112.62    7.23
  -3 -11  -8    6.89    2.21
  -3  11  -8    8.12    1.49
  -3  11  -8    9.13    1.92
  -3  11  -9    1.56    0.97
  -3 -11  -9    2.38    1.33
  -3  12   9    1.07    1.45
  -3 -12   9    1.07    2.06
  -3  12   8   14.73    2.37
  -3 -12   8   16.00    3.34
   3  12  -8   15.98    2.58
  -3  12   7  150.40    9.90
   3  12  -7  165.42   10.58
  -3 -12   7  164.70   11.15
  -3  12   7  157.11   10.03
  -3  12   6   88.41    6.32
  -3 -12   6   93.20    7.35
  -3  12   6   88.24    6.30
  -3 -12   5    4.28    2.59
  -3  12   5    5.13    2.24
  -3  12   5    0.23    1.99
  -3  12   4   40.27    4.24
  -3  12   4   45.53    4.41
  -3  12   3   15.92    2.95
  -3  12   3   20.45    3.15
  -3  12   2   94.93    7.07
  -3  12   1   82.07    6.33
  -3  12   0   37.09    3.86
  -3 -12   0   38.90    4.78
  -3  12  -1   23.18    3.14
  -3 -12  -1   34.04    4.55
  -3  12  -2  347.25   20.45
  -3 -12  -2  369.07   21.99
  -3  12  -3   71.64    5.43
  -3 -12  -3   68.12    7.12
  -3 -12  -3   68.17    7.89
  -3  12  -3   68.28    5.67
  -3 -12  -4  155.91   11.30
  -3  12  -4  136.83    9.43
  -3 -12  -5   54.52    6.77
  -3  12  -5   87.32    5.64
  -3 -12  -6    1.96    2.43
  -3 -12  -6    6.58    3.23
  -3  12  -6    2.62    1.35
  -3 -12  -7    1.00    1.83
  -3 -12  -7    1.39    2.26
  -3  12  -7    0.61    1.08
  -3  13   8  434.51   23.91
   3  13  -8  408.67   24.12
  -3 -13   8  459.97   24.38
  -3  13   7    2.30    1.38
   3  13  -7   -0.20    1.47
  -3  13   6   88.79    6.16
  -3  13   6   87.13    6.29
  -3  13   5    3.62    1.97
  -3  13   5    4.79    2.04
  -3  13   4  302.30   16.72
  -3  13   4  266.61   16.60
  -3  13   3    8.60    2.31
  -3  13   3    9.78    2.40
  -3 -13   3   11.13    4.14
  -3  13   2  131.58    8.78
  -3  13   1    5.30    2.17
  -3  13   0  114.59    7.77
  -3  13  -1    5.49    1.98
  -3 -13  -1    4.32    2.79
  -3  13  -2   46.23    4.09
  -3 -13  -2   46.67    5.31
  -3  13  -3   -0.89    1.53
  -3 -13  -3   -1.37    2.89
  -3 -13  -4   75.97    7.17
  -3  13  -4   91.13    5.96
  -3 -13  -5    2.37    2.74
  -3  13  -5   -0.14    1.21
  -3 -13  -6  163.49   11.94
   3 -13   6  188.82   11.46
  -3  14   6   34.58    2.79
  -3  14   6   31.54    2.57
  -3  14   5   -0.56    1.34
  -3  14   5   -0.44    1.61
  -3 -14   5   -0.77    3.19
  -3  14   4   33.16    2.99
  -3  14   4   28.01    2.89
  -3  14   3   -0.17    1.49
  -3  14   3   -0.16    1.54
  -3 -14   3    2.99    3.15
  -3  14   2   55.94    4.45
  -3  14   1   10.37    2.06
  -3  14   0   23.12    2.75
  -3  14  -1    1.79    1.52
  -3  14  -2  144.18    8.75
  -3 -14  -2  136.07    9.55
  -3  14  -3   18.25    2.16
  -3 -14  -3   20.13    3.30
  -3  14  -3   16.08    2.04
  -3 -14  -4  113.65    8.74
  -3  14  -4  141.83    7.97
  -3  15   2   65.21    4.51
  -3  15   1   36.15    3.05
  -3  15   0   20.98    2.20
  -4   0  15   -0.16    1.43
  -4   0  14   11.64    2.53
   4   0 -14    6.71    2.00
  -4   0  13    0.33    2.55
   4   0 -13   -0.54    1.88
  -4   0  13   -0.75    1.74
   4   0 -12  532.31   30.35
  -4   0  12  522.94   30.17
   4   0 -11   -1.69    2.49
  -4   0  11   -0.32    2.06
   4   0 -10  176.27   11.88
  -4   0  10  168.75   11.57
   4   0  -9    1.64    2.38
  -4   0   9    1.84    2.13
   4   0  -8  107.33    8.32
  -4   0   8  120.99   11.96
  -4   0   8  123.94    8.49
  -4   0   7   -0.76    2.53
  -4   0   6  561.69   34.48
  -4   0   5   -1.03    1.85
  -4   0   4 2088.75  113.85
  -4   0   3    0.43    2.34
  -4   0   2   32.40    4.40
  -4   0   2   25.78    4.14
  -4   0   1   -0.40    2.42
  -4   0   1    0.42    2.47
  -4   0   0 3548.87  191.55
  -4   0   0 3608.52  192.62
  -4   0  -1    1.67    2.16
  -4   0  -1   -0.44    2.38
  -4   0  -2  101.25    9.51
  -4   0  -2  117.52    9.72
  -4   0  -3   -0.55    2.38
  -4   0  -3    1.22    3.15
  -4   0  -3    1.20    2.42
  -4   0  -4  583.81   34.28
  -4   0  -4  548.72   35.42
  -4   0  -4  631.63   36.66
  -4   0  -5   -1.14    4.62
  -4   0  -5   -0.86    2.65
  -4   0  -5    0.95    2.63
  -4   0  -5   -0.22    1.84
  -4   0  -5   -1.43    2.61
  -4   0  -6    4.24    4.06
  -4   0  -6    5.48    5.83
  -4   0  -6    2.30    3.29
  -4   0  -6    0.88    3.47
  -4   0  -6    3.00    1.81
  -4   0  -7    0.61    3.62
  -4   0  -7   -7.34    3.77
  -4   0  -7    0.47    1.85
  -4   0  -7   -1.12    2.45
  -4   0  -8   11.81    3.89
  -4   0  -8   12.48    4.16
  -4   0  -8   15.16    2.35
  -4   0  -8    8.85    3.00
  -4   0  -9    0.42    2.97
  -4   0  -9    0.91    1.62
  -4   0  -9    1.47    2.31
  -4   0 -10   63.12    5.39
  -4   0 -10   63.10    5.82
  -4   0 -11    0.93    1.51
  -4   0 -11   -0.26    1.77
  -4   0 -12    9.13    1.83
   4   1 -15    5.13    1.34
  -4  -1  15    6.47    1.68
  -4   1  15    9.20    1.87
   4  -1 -14  181.81   10.89
   4   1 -14  182.32   10.86
  -4  -1  14  169.96   11.09
  -4   1  14  171.96   11.07
  -4  -1  14  162.44   10.68
   4   1 -13  170.00   10.65
   4  -1 -13  149.49   10.40
  -4  -1  13  158.91   11.15
  -4   1  13  161.80   11.05
  -4  -1  13  160.53   10.47
   4  -1 -12  154.99    9.95
   4   1 -12  141.24    9.87
  -4   1  12  128.30    9.49
  -4  -1  12  137.39    9.74
   4  -1 -11   27.95    3.78
   4   1 -11   28.17    3.98
  -4   1  11   21.34    3.34
  -4  -1  11   32.37    3.93
   4  -1 -10  171.95   12.12
   4   1 -10  186.43   12.44
  -4   1  10  185.05   12.07
  -4  -1  10  185.96   12.25
   4  -1  -9   83.14    6.86
   4   1  -9   80.79    6.81
  -4   1   9   89.16    6.80
  -4  -1   9   74.88    6.76
   4  -1  -8 1671.09   85.94
   4   1  -8 1537.12   85.77
  -4   1   8 1520.95   90.04
  -4  -1   8 1479.68   90.66
  -4   1   8 1641.17   85.65
  -4  -1   8 1539.80   85.73
  -4   1   7  163.54   13.51
  -4  -1   7  152.39   13.61
  -4   1   6  268.28   18.95
  -4  -1   6  279.95   19.28
  -4   1   5   -0.53    1.90
  -4  -1   5   -1.01    2.26
  -4   1   4 1927.89  104.31
  -4  -1   4 1886.61  104.20
  -4   1   3  170.58   11.98
  -4  -1   3  159.60   11.87
  -4   1   2  470.46   29.97
   4  -1  -2  472.11   29.58
  -4   1   2  514.64   29.70
  -4  -1   2  516.75   29.75
  -4  -1   2  523.80   29.99
  -4   1   1    6.47    3.25
  -4   1   1    5.58    2.55
  -4  -1   1    6.11    2.63
   4  -1  -1    4.41    2.16
  -4  -1   1    7.14    2.79
  -4  -1   0   13.67    3.45
  -4   1   0   13.12    4.17
  -4   1   0    9.33    2.63
  -4  -1   0   11.20    3.11
  -4  -1   0   17.82    3.73
  -4  -1  -1  116.88    9.66
  -4   1  -1  110.59    9.03
  -4  -1  -1  115.17    9.40
  -4   1  -1  122.44   10.79
  -4   1  -2    0.48    2.12
  -4  -1  -2    1.94    2.20
  -4  -1  -2   -2.06    2.66
  -4   1  -2    0.48    2.25
  -4  -1  -2    0.51    2.35
  -4  -1  -3   -0.58    2.56
  -4   1  -3    0.53    2.58
  -4  -1  -3    1.85    2.92
  -4   1  -4 1258.58   67.63
  -4  -1  -4 1127.01   68.65
  -4  -1  -4 1153.09   69.08
  -4  -1  -5    2.18    4.75
  -4   1  -5   11.71    5.85
  -4   1  -5    5.43    3.09
  -4  -1  -5    4.81    3.58
  -4   1  -5    5.51    3.42
  -4  -1  -5    7.71    3.07
  -4   1  -5    5.75    1.92
  -4  -1  -5    3.91    2.01
  -4   1  -5    4.95    1.98
  -4  -1  -5    4.13    2.16
  -4   1  -5    5.40    2.72
  -4  -1  -5    3.97    2.67
  -4  -1  -6    3.95    5.62
  -4   1  -6    5.53    5.90
  -4  -1  -6    3.62    3.91
  -4   1  -6    8.77    3.99
  -4  -1  -6   16.96    4.36
  -4   1  -6   12.80    3.75
  -4  -1  -6   12.39    3.78
  -4  -1  -6   12.46    2.49
  -4   1  -6   10.52    2.26
  -4  -1  -6   11.43    2.98
  -4   1  -7   13.15    4.00
  -4  -1  -7   11.66    4.26
  -4   1  -7   10.21    3.81
  -4  -1  -7   15.63    4.36
  -4  -1  -7   10.02    2.33
  -4   1  -7   12.01    2.46
  -4  -1  -7    7.64    2.94
  -4   1  -7    7.60    2.94
  -4   1  -8  323.35   19.74
  -4  -1  -8  290.06   19.42
  -4   1  -8  314.11   20.15
  -4  -1  -8  294.42   20.17
  -4   1  -8  330.05   18.45
  -4  -1  -8  295.74   17.69
  -4   1  -8  286.12   17.54
  -4  -1  -8  291.11   18.66
  -4   1  -8  280.56   18.68
  -4   1  -9   77.36    6.78
  -4  -1  -9   60.09    6.40
  -4   1  -9   67.41    5.73
  -4   1  -9   58.31    4.97
  -4  -1  -9   55.91    5.74
  -4   1  -9   55.55    5.83
  -4   1 -10  144.39    9.68
  -4   1 -10  130.81    8.98
  -4  -1 -10  154.96   10.05
  -4   1 -10  137.96    9.94
  -4   1 -11   14.61    2.44
  -4  -1 -11   14.63    2.65
  -4   1 -11   14.47    2.71
  -4   1 -12   50.36    4.12
  -4   2  15  324.27   18.47
  -4  -2  15  339.76   18.45
   4   2 -15  321.19   18.33
   4   2 -14   91.86    6.37
  -4  -2  14   92.62    6.75
  -4   2  14   87.39    6.55
  -4  -2  14   91.37    6.40
  -4  -2  13    6.27    3.01
  -4   2  13    6.35    2.58
   4  -2 -13    5.10    2.14
   4   2 -13    4.16    2.10
  -4  -2  13    3.58    1.96
   4  -2 -12   65.22    5.62
   4   2 -12   65.48    5.78
  -4  -2  12   57.27    5.55
   4  -2 -11  160.73   10.82
   4   2 -11  161.89   11.06
  -4  -2  11  146.92   10.78
   4  -2 -10  315.71   19.03
   4   2 -10  305.37   19.21
  -4   2  10  313.68   18.84
  -4  -2  10  309.20   19.22
   4  -2  -9  384.93   22.87
   4   2  -9  375.68   23.06
  -4   2   9  398.56   22.75
  -4  -2   9  384.08   23.09
   4  -2  -8   58.01    8.23
   4   2  -8   66.41    5.98
  -4   2   8   62.97    8.12
  -4  -2   8   68.06    9.03
  -4   2   8   72.58    5.77
  -4  -2   8   72.00    6.13
   4  -2  -7   -0.79    3.11
   4   2  -7    0.26    1.95
  -4   2   7   -2.17    2.60
  -4   2   7    1.25    4.02
  -4   2   7    0.95    1.62
   4  -2  -6  279.51   20.66
  -4   2   6  333.95   20.85
  -4   2   6  269.99   23.25
  -4  -2   5  315.38   22.15
  -4   2   5  294.12   23.46
  -4   2   5  328.15   20.85
  -4  -2   5  314.53   20.76
  -4  -2   4  571.75   33.64
  -4   2   4  542.21   34.59
  -4   2   4  518.23   32.13
  -4  -2   4  542.21   32.20
  -4  -2   3    0.52    2.34
  -4   2   3    2.44    2.82
   4  -2  -3    1.00    2.06
  -4   2   3    2.63    2.15
  -4  -2   3    2.15    2.19
  -4  -2   3   -1.40    2.49
  -4  -2   2   24.01    3.74
  -4   2   2   23.27    4.31
   4  -2  -2   31.08    4.33
  -4   2   2   25.94    3.94
  -4  -2   2   19.15    3.64
  -4  -2   2   18.67    3.97
  -4   2   1   34.09    5.30
  -4   2   1   35.13    4.18
  -4   2   1   28.65    4.20
  -4  -2   1   38.78    4.82
   4  -2  -1   36.80    4.79
  -4  -2   1   43.30    5.49
  -4   2   0 2241.01  134.91
  -4   2   0 2380.42  136.73
   4  -2   0 2372.86  135.49
  -4  -2  -1  155.49   11.34
  -4   2  -1  122.02   10.04
  -4  -2  -1  135.51   10.53
  -4   2  -1  131.83   12.27
  -4   2  -2    5.80    2.95
  -4  -2  -2    5.62    3.22
  -4  -2  -2   -0.54    2.26
  -4   2  -3   24.22    4.43
  -4  -2  -3   24.71    4.84
  -4   2  -4   50.45    6.44
  -4  -2  -4   50.37    7.37
  -4  -2  -5  909.74   59.37
  -4   2  -5 1076.32   55.00
  -4  -2  -5  948.11   54.62
  -4   2  -5 1001.83   56.10
  -4  -2  -5  998.08   55.39
  -4   2  -5  943.19   53.21
  -4   2  -5 1002.71   53.83
  -4  -2  -5  977.77   53.68
  -4  -2  -6   67.71   10.68
  -4   2  -6   73.44    7.58
  -4  -2  -6   79.83    7.58
  -4   2  -6   80.65    8.40
  -4  -2  -6   89.36    8.41
  -4   2  -6   80.04    5.98
  -4  -2  -6   75.60    6.13
  -4   2  -7  118.10    9.83
  -4  -2  -7  105.00    9.61
  -4   2  -7  118.98   10.33
  -4  -2  -7  123.83   10.70
  -4   2  -7  121.35    8.00
  -4   2  -7  106.78    8.90
  -4   2  -8   55.70    6.39
  -4  -2  -8   59.67    6.57
  -4   2  -8   67.59    6.92
  -4  -2  -8   59.12    7.15
  -4   2  -8   59.73    5.61
  -4   2  -8   59.60    4.92
  -4   2  -8   50.15    5.77
  -4   2  -9  672.44   34.37
  -4  -2  -9  564.94   33.90
  -4   2  -9  569.21   33.25
  -4   2  -9  564.38   32.49
  -4   2  -9  576.56   33.72
  -4   2 -10   10.72    2.45
  -4   2 -10    8.02    1.91
  -4   2 -10   10.25    2.70
  -4   2 -11    8.18    2.05
  -4   2 -11    7.61    2.14
  -4   2 -12   -0.71    1.23
  -4  -3  14   90.86    6.35
   4   3 -13  734.01   39.29
  -4  -3  13  679.51   39.21
   4  -3 -12    6.79    2.51
   4   3 -12    9.20    2.65
  -4  -3  12    5.49    2.48
   4  -3 -11  449.18   25.47
   4   3 -11  434.68   25.67
  -4  -3  11  418.01   25.59
   4  -3 -10  184.55   12.71
   4   3 -10  194.75   13.17
  -4  -3  10  213.74   13.41
   4   3  -9  248.43   16.37
  -4  -3   9  276.93   16.86
  -4   3   8   99.92   10.26
   4  -3  -8   88.20   10.09
   4   3  -8   77.63    6.92
  -4   3   8   91.44    9.77
  -4   3   8   96.37    6.88
  -4  -3   8   84.27    7.34
  -4   3   7  224.05   17.31
   4  -3  -7  255.42   18.76
   4   3  -7  226.09   14.60
  -4  -3   7  238.91   19.27
  -4   3   7  235.65   21.16
  -4   3   7  244.31   14.46
  -4   3   6    1.20    2.29
   4  -3  -6    5.90    2.82
  -4  -3   6   -1.75    3.04
  -4   3   6    2.56    4.44
  -4   3   5  314.95   19.69
  -4  -3   5  339.77   21.83
  -4   3   4  140.86   10.64
  -4  -3   4  147.21   12.11
  -4  -3   4  128.05   10.52
  -4   3   3  585.97   32.81
  -4   3   3  527.30   32.18
  -4  -3   3  563.36   33.63
  -4   3   3  582.48   33.51
   4  -3  -3  564.63   33.55
  -4  -3   3  502.71   32.30
  -4  -3   3  574.92   33.27
  -4   3   2    5.68    2.44
  -4  -3   2    1.97    2.29
  -4   3   2    7.95    3.15
  -4  -3   2    2.92    2.58
   4  -3  -2    4.07    2.41
  -4  -3   2    3.49    2.93
  -4   3   1  292.78   18.34
  -4   3   1  271.77   19.43
  -4  -3   1  298.43   18.55
   4  -3  -1  295.80   19.06
  -4   3   1  264.95   18.10
  -4  -3   1  320.87   19.81
  -4   3   0  313.84   20.29
  -4  -3   0  358.66   21.15
  -4   3   0  323.91   22.51
   4  -3   0  326.03   21.16
  -4   3  -1 1864.25  103.11
  -4  -3  -1 1942.12  103.75
  -4   3  -1 1975.32  106.93
   4  -3   1 1839.70  103.92
  -4   3  -2    0.45    1.98
  -4   3  -2    2.01    4.48
  -4  -3  -2    1.17    2.24
   4  -3   2    4.49    2.55
  -4   3  -3   32.69    4.91
  -4  -3  -3   27.25    5.18
  -4  -3  -4  173.00   15.27
  -4   3  -4  161.91   10.50
  -4   3  -5  144.84    9.59
  -4  -3  -5  147.80   11.41
  -4   3  -5  154.85    9.69
  -4   3  -5  160.56   10.18
  -4  -3  -6   44.58    6.12
  -4   3  -6   40.72    4.10
  -4   3  -7   51.40    5.94
  -4   3  -7   32.51    4.46
  -4  -3  -8   -1.30    2.89
  -4   3  -8   -0.23    1.72
  -4  -3  -9  393.68   24.10
  -4   3  -9  431.70   23.93
  -4   3  -9  388.55   22.93
  -4   3  -9  402.31   24.04
  -4   3 -10  143.41    9.69
  -4   3 -10  146.89    9.06
  -4   3 -10  128.75    9.65
  -4   3 -11  228.93   14.04
  -4   3 -11  234.07   14.10
  -4   3 -12    2.67    1.44
   4  -4 -14   70.75    5.37
  -4  -4  14   78.63    5.44
   4  -4 -13   31.55    3.58
  -4  -4  13   31.44    4.00
  -4  -4  13   29.54    3.43
   4   4 -12   10.64    2.71
   4  -4 -12   13.51    2.89
  -4  -4  12    9.03    2.58
   4   4 -11   83.43    6.88
   4  -4 -11   69.02    6.54
   4  -4 -11   81.31    6.51
  -4  -4  11   80.31    6.93
   4   4 -10   26.52    3.98
  -4  -4  10   25.31    4.06
   4   4  -9 1192.89   66.32
  -4  -4   9 1220.74   66.92
   4   4  -8    1.86    2.23
  -4   4   7   16.08    4.14
   4  -4  -7   19.53    5.00
   4   4  -7   12.15    2.79
  -4  -4   7   15.06    4.72
  -4   4   7   20.31    6.20
  -4   4   6   67.11    7.57
  -4   4   6   71.01   10.19
  -4  -4   6   55.65    8.41
  -4   4   6   43.57    8.99
  -4  -4   6   78.06    6.17
  -4   4   5  313.73   20.42
  -4   4   5  272.99   23.88
  -4  -4   5  311.45   22.20
  -4   4   4   12.88    3.10
  -4   4   4    8.87    3.00
  -4  -4   4    7.22    3.76
  -4  -4   4    7.88    3.46
  -4   4   3  130.54   10.14
  -4  -4   3  116.31   10.92
  -4   4   3  135.47   10.92
   4  -4  -3  129.49   10.91
   4  -4  -3  137.66   11.11
  -4  -4   3  130.43   10.74
  -4   4   2  186.39   13.01
  -4  -4   2  181.97   13.83
  -4   4   2  187.99   13.98
   4  -4  -2  173.13   13.63
   4  -4  -2  185.78   13.71
  -4  -4   2  184.45   13.68
  -4   4   1  264.69   17.22
  -4   4   1  276.41   17.38
  -4   4   1  249.84   18.47
   4  -4  -1  251.30   17.82
   4  -4  -1  256.46   17.60
  -4  -4   1  270.05   18.09
  -4   4   0  189.22   12.92
  -4   4   0  169.36   14.76
   4  -4   0  179.06   13.50
  -4   4  -1  151.63   11.16
  -4   4  -1  134.77   13.83
   4  -4   1  143.94   11.72
  -4   4  -2   95.53   12.91
  -4  -4  -2   88.28    9.35
   4  -4   2   98.99    9.57
  -4   4  -2  114.50    9.16
  -4   4  -3   -1.12    2.31
  -4  -4  -3    2.27    3.06
   4  -4   3    0.71    2.89
  -4  -4  -4  136.32    9.68
  -4   4  -4  141.98   11.63
  -4  -4  -4  118.73   12.87
  -4   4  -4  128.08    9.09
  -4   4  -4  127.86    8.45
  -4   4  -4  128.53    8.43
  -4   4  -4  133.49    8.81
  -4   4  -5 1519.21   76.48
  -4   4  -5 1345.45   75.26
  -4   4  -5 1381.11   75.33
  -4   4  -6  136.99   10.31
  -4   4  -6  154.52    9.58
  -4   4  -6  147.18    9.62
  -4   4  -7   28.88    3.84
  -4   4  -7   22.35    3.19
  -4   4  -7   18.54    3.57
  -4   4  -8   43.34    4.10
  -4   4  -8   43.60    4.96
  -4   4  -9  747.64   41.81
  -4   4  -9  724.96   40.94
  -4   4  -9  772.45   42.08
  -4   4 -10   11.29    2.46
  -4   4 -10    8.45    1.91
  -4   4 -10    9.43    2.54
  -4   4 -11   27.18    3.10
  -4   4 -12    1.80    1.29
  -4  -5  14    2.25    1.82
  -4  -5  14    0.16    1.20
   4   5 -14    0.42    1.15
   4  -5 -13  366.11   22.49
  -4  -5  13  418.34   22.86
  -4  -5  13  400.65   22.59
   4  -5 -12   72.24    6.11
  -4  -5  12   64.60    6.70
  -4  -5  12   73.66    6.07
   4  -5 -11  133.41   10.00
  -4  -5  11  151.00   10.39
   4  -5 -10  214.87   14.21
  -4  -5  10  228.80   14.86
   4   5 -10  211.25   14.14
   4   5  -9    5.79    2.68
   4  -5  -9    6.88    2.67
   4   5  -8  355.00   22.43
   4  -5  -8  408.03   22.80
  -4   5   7    7.69    3.61
   4  -5  -7    9.53    4.18
   4   5  -7   11.64    2.71
  -4  -5   7   10.04    3.42
  -4   5   6  506.14   32.71
  -4   5   6  572.15   37.42
  -4  -5   6  445.95   34.10
  -4  -5   6  513.68   30.12
  -4  -5   6  554.74   30.33
  -4   5   5 1086.53   60.81
  -4  -5   5  990.43   62.41
  -4  -5   5  984.86   57.59
  -4  -5   5 1162.26   58.23
  -4   5   4  468.50   28.10
  -4   5   4  429.99   27.55
  -4  -5   4  418.27   29.12
   4  -5  -4  453.64   28.56
  -4   5   3   68.03    7.26
  -4  -5   3   72.79    8.36
   4  -5  -3   70.54    7.95
   4  -5  -3   85.41    8.42
  -4   5   2   81.64    7.47
  -4   5   2   65.78    7.00
  -4   5   2   65.46    7.58
   4  -5  -2   74.06    7.77
   4  -5  -2   73.18    7.80
  -4  -5   2   56.37    7.17
  -4   5   1  203.61   14.65
  -4   5   1  192.73   14.59
  -4   5   1  217.91   16.31
   4  -5  -1  228.35   15.74
   4  -5  -1  209.60   15.33
  -4   5   0   24.13    4.07
  -4   5   0   24.20    5.58
   4  -5   0   28.68    4.82
   4  -5   0   25.27    4.53
  -4   5  -1  698.24   41.45
  -4   5  -1  802.66   46.24
   4  -5   1  675.43   42.29
  -4   5  -2    0.55    2.05
  -4  -5  -2   -0.69    2.80
   4  -5   2    6.95    3.47
  -4  -5  -3   20.60    3.55
  -4   5  -3   23.26    4.32
  -4  -5  -3   11.65    4.34
  -4   5  -3   22.42    3.22
  -4   5  -3   14.58    2.47
   4  -5   3   23.45    5.01
  -4  -5  -4   49.26    5.79
  -4  -5  -4   50.65    8.15
  -4   5  -4   46.79    4.91
  -4   5  -4   52.30    4.34
   4  -5   4   39.03    6.80
  -4  -5  -5  323.58   20.95
  -4   5  -5  349.70   20.27
  -4   5  -5  312.05   19.04
  -4   5  -5  341.04   19.26
  -4   5  -6   -0.36    2.11
  -4   5  -6    0.66    1.61
  -4   5  -6    1.12    1.97
  -4   5  -7   14.23    2.99
  -4   5  -7   11.89    2.47
  -4   5  -7   12.44    2.67
  -4   5  -8  146.20   10.30
  -4   5  -9  190.50   12.32
  -4   5  -9  193.32   12.36
  -4   5  -9  185.04   11.63
  -4   5 -10   10.20    2.30
  -4   5 -10   10.35    1.93
  -4   5 -11    4.46    1.65
  -4  -6  13  115.89    7.84
  -4  -6  13  110.05    7.51
  -4  -6  12  186.35   11.64
  -4  -6  12  148.99   10.63
   4  -6 -11   10.79    2.97
  -4  -6  11   18.16    5.04
   4  -6 -10  132.20    9.75
   4   6  -9  591.37   35.36
   4  -6  -9  655.15   35.76
   4   6  -8   46.18    4.97
   4  -6  -8   51.27    5.29
   4  -6  -8   50.66    5.49
  -4  -6   7    5.22    4.27
   4  -6  -7    1.77    2.92
  -4  -6   6    9.79    3.60
  -4   6   6    6.67    3.74
  -4  -6   6   12.96    3.67
  -4  -6   6    9.95    3.12
   4  -6  -6   13.43    3.88
  -4   6   5  150.60   12.76
  -4   6   5  130.59   12.35
  -4  -6   5  149.04   10.11
  -4  -6   5  124.63   13.69
  -4  -6   5  173.63   10.74
  -4  -6   5  149.41   10.27
  -4   6   4  516.36   32.07
  -4  -6   4  440.41   33.03
  -4  -6   4  488.63   28.92
  -4  -6   4  584.17   29.76
   4  -6  -4  553.74   33.11
  -4  -6   4  506.50   29.15
  -4   6   3  323.38   21.83
  -4   6   3  333.77   21.88
  -4  -6   3  356.25   19.74
   4  -6  -3  347.14   22.86
   4  -6  -3  354.24   23.12
  -4  -6   3  302.49   19.09
  -4   6   2  124.66   10.89
  -4   6   2  138.48   11.11
  -4   6   2  128.06   11.81
   4  -6  -2  149.05   12.19
   4  -6  -2  128.77   11.69
  -4   6   1  505.78   31.54
  -4   6   1  471.59   31.30
  -4   6   1  537.83   33.40
   4  -6  -1  548.99   32.73
   4  -6  -1  542.40   32.61
  -4   6   0 1135.22   62.69
  -4   6   0 1122.54   65.34
   4  -6   0 1072.72   63.38
   4  -6   0 1077.79   63.28
  -4  -6  -1  125.69    8.99
  -4   6  -1  130.00   10.77
  -4  -6  -1  128.23    9.01
   4  -6   1  103.79   10.87
  -4  -6  -1  132.11    8.84
   4  -6   1  131.69   11.59
  -4  -6  -2   70.19    6.67
  -4   6  -2   80.78    8.28
  -4   6  -2   84.93    6.52
   4  -6   2   77.63    8.91
  -4  -6  -3  422.57   23.46
  -4   6  -3  374.75   24.85
  -4   6  -3  382.83   22.31
  -4   6  -3  346.05   21.25
  -4  -6  -4  351.87   22.41
  -4   6  -4  363.89   21.24
  -4   6  -4  339.92   20.10
  -4  -6  -5  164.84   13.68
  -4   6  -5  201.28   12.99
  -4   6  -5  185.89   11.72
  -4   6  -5  197.11   11.87
  -4  -6  -6   -1.50    3.41
  -4   6  -6    1.84    2.16
  -4   6  -6    0.23    1.64
  -4   6  -6    1.57    2.08
  -4   6  -7    6.83    2.51
  -4   6  -7    4.28    2.01
  -4   6  -8   10.20    2.66
  -4   6  -9  179.59   11.39
  -4   6  -9  156.56   11.10
  -4   6  -9  179.25   10.71
  -4   6 -10   50.74    4.48
  -4   6 -10   48.75    4.07
  -4   6 -11   30.37    2.92
  -4  -7  13    3.37    1.99
  -4  -7  12   41.56    4.79
  -4  -7  11   11.21    4.08
  -4  -7  10   99.97    9.93
  -4  -7   9   69.18    9.02
   4  -7  -9   85.44    6.79
  -4  -7   8  511.01   29.34
   4  -7  -8  521.91   27.59
  -4  -7   7  149.46   11.51
   4  -7  -7  144.70   10.69
  -4  -7   7  142.28   11.83
  -4  -7   6   40.82    5.33
  -4  -7   6   43.42    5.35
   4  -7  -6   34.82    5.01
  -4  -7   5  781.38   43.61
  -4  -7   5  824.55   44.21
   4  -7  -5  732.15   44.25
  -4  -7   5  802.63   44.09
  -4   7   4  909.13   54.79
  -4   7   4  923.34   54.96
  -4  -7   4 1089.19   52.49
   4  -7  -4  868.43   52.31
  -4  -7   4  909.67   51.74
  -4   7   3   83.72    9.29
  -4   7   3  106.36    9.96
  -4  -7   3  112.61    8.01
   4  -7  -3  113.93   10.94
  -4  -7   3  101.96    7.46
  -4   7   2  114.68   10.93
  -4   7   2  130.69   11.40
  -4  -7   2  140.49    9.39
   4  -7  -2  143.01   12.37
   4  -7  -2  132.57   12.22
  -4  -7   2  130.56    8.85
  -4   7   1  567.94   34.44
  -4   7   1  548.14   34.49
  -4   7   1  602.08   34.83
  -4   7   1  546.30   35.90
  -4  -7   1  582.07   32.00
   4  -7  -1  583.60   35.61
  -4  -7   1  564.38   31.78
   4  -7  -1  616.56   35.96
  -4  -7   1  514.44   31.33
  -4  -7   0    3.18    1.94
  -4   7   0    5.65    2.61
  -4   7   0    3.75    3.89
  -4  -7   0    2.41    2.35
   4  -7   0   -0.75    2.80
  -4   7   0    2.47    2.63
  -4  -7   0    2.06    2.71
   4  -7   0    4.53    3.28
  -4  -7  -1  176.85   11.54
  -4   7  -1  149.28   12.96
  -4   7  -1  147.67   13.16
  -4  -7  -1  168.27   11.47
   4  -7   1  176.11   14.55
  -4  -7  -1  174.59   11.06
   4  -7   1  154.81   13.91
  -4  -7  -2   11.21    3.20
  -4   7  -2    5.42    2.77
  -4   7  -2    7.89    2.62
  -4  -7  -2    9.86    3.49
  -4   7  -3    7.02    2.07
  -4  -7  -3    3.44    3.20
  -4   7  -3    5.77    2.43
  -4   7  -3    3.02    1.89
  -4  -7  -4  473.19   28.95
  -4   7  -4  498.78   26.48
  -4   7  -4  445.05   27.06
  -4   7  -4  432.45   25.93
  -4  -7  -5  104.48   10.28
  -4   7  -5  123.36    9.07
  -4   7  -5  115.66    7.90
  -4   7  -5  114.43    7.94
  -4  -7  -6   11.04    4.23
  -4   7  -6   11.92    3.08
  -4   7  -6   10.08    2.39
  -4  -7  -7   67.28    6.60
  -4   7  -7   49.66    5.50
  -4   7  -7   58.06    4.80
  -4   7  -8  148.54   10.27
  -4   7  -9    4.67    1.85
  -4   7  -9    4.94    1.82
  -4   7  -9    4.48    1.67
  -4   7 -10  105.84    7.18
  -4   7 -10  108.49    7.18
  -4   7 -10  105.15    6.72
  -4  -8  12   21.45    3.25
  -4  -8  11   19.53    4.10
  -4  -8  10  113.40   10.09
  -4  -8  10  126.48   10.13
  -4  -8   9  133.53   11.85
   4  -8  -9  151.45   10.07
  -4  -8   9  141.52   12.06
  -4  -8   8    5.21    5.05
  -4  -8   8    5.80    4.39
   4  -8  -8    8.77    3.08
  -4  -8   7    9.31    4.58
  -4  -8   7   15.36    4.46
   4  -8  -7   15.16    3.58
   4  -8  -6  234.56   15.94
  -4  -8   6  252.05   16.39
  -4  -8   5    9.80    3.24
  -4  -8   5   13.55    3.44
   4  -8  -5   13.72    4.15
  -4   8   5   10.02    2.60
  -4  -8   4  298.46   16.49
   4  -8  -4  242.14   16.30
  -4  -8   4  241.68   15.78
  -4   8   4  249.22   15.26
  -4  -8   3  142.19   10.00
  -4  -8   3  135.77    9.47
  -4  -8   2    1.01    2.02
  -4  -8   2    2.52    2.68
  -4  -8   1  297.33   18.63
  -4  -8   1  312.81   18.64
  -4  -8   0  773.95   44.27
  -4  -8   0  800.61   43.87
  -4  -8  -1  235.51   15.80
  -4  -8  -1  249.11   16.19
  -4  -8  -1  258.20   15.45
  -4  -8  -2   27.53    4.41
  -4   8  -2   28.43    4.02
  -4  -8  -2   24.75    4.93
  -4   8  -3  236.84   14.53
  -4  -8  -3  241.66   16.53
  -4   8  -3  224.36   15.08
  -4  -8  -3  228.52   16.42
  -4   8  -4   29.53    3.63
  -4  -8  -4   27.75    5.66
  -4   8  -4   32.67    4.30
  -4   8  -4   22.34    3.06
  -4   8  -5   38.14    4.06
  -4  -8  -5   32.50    6.17
  -4   8  -5   34.06    4.56
  -4   8  -5   36.22    3.72
  -4   8  -6  115.40    8.97
  -4  -8  -6  153.84   11.86
  -4   8  -6  143.73   10.09
  -4   8  -6  144.17    9.05
  -4  -8  -7  120.53    9.78
  -4   8  -7  120.86    8.95
  -4   8  -7  120.51    8.06
  -4  -8  -8  102.97    7.59
  -4   8  -8   87.41    6.96
  -4   8  -8   95.89    7.13
  -4   8  -9    3.33    1.46
  -4   8  -9    4.74    1.71
  -4   8  -9    2.91    1.49
  -4   8  -9    4.47    1.49
  -4   8 -10   -0.98    1.22
  -4   8 -10    0.45    1.11
  -4   9  12    4.59    1.50
  -4  -9  12    5.39    1.96
   4  -9 -12    4.60    1.59
  -4  -9  11   98.20    7.20
  -4  -9  11   84.84    6.84
  -4   9  11   95.79    6.36
  -4  -9  10  532.60   29.09
  -4  -9  10  501.63   29.10
  -4   9  10  471.54   27.71
  -4  -9   9   52.74    6.74
   4  -9  -9   45.81    4.80
  -4   9   9   51.26    4.68
  -4  -9   8   63.53    8.10
   4  -9  -8   69.26    6.43
  -4   9   8   82.56    6.18
  -4  -9   7   50.99    6.72
   4  -9  -7   42.00    5.31
  -4   9   7   48.81    4.65
  -4   9   6    9.94    2.88
  -4  -9   6    9.14    3.94
   4  -9  -6    8.90    3.69
   4  -9  -5  237.24   15.94
  -4  -9   5  263.89   16.14
  -4   9   5  239.99   14.91
  -4  -9   4   77.58    6.92
   4  -9  -4   68.90    6.96
  -4  -9   4   82.16    6.69
  -4   9   4   81.81    6.19
  -4  -9   3   41.11    4.95
  -4  -9   3   46.07    4.73
  -4  -9   2    1.35    2.62
  -4  -9   2    1.35    2.27
  -4  -9   1   28.19    4.13
  -4  -9   1   24.98    4.40
  -4  -9   0  129.63   10.25
  -4  -9   0  148.83   10.04
  -4  -9  -1   21.56    4.48
  -4   9  -2   12.71    2.79
  -4  -9  -2   16.71    3.79
  -4  -9  -2   12.88    4.10
  -4   9  -3    1.14    2.07
  -4  -9  -3    2.75    3.31
  -4  -9  -3    4.97    4.22
  -4   9  -4  354.18   22.79
  -4  -9  -4  442.15   26.17
  -4   9  -4  394.56   23.62
  -4  -9  -4  395.54   25.48
  -4   9  -4  409.11   22.66
  -4   9  -5    4.60    2.18
  -4  -9  -5    7.01    4.14
  -4   9  -5    3.19    2.41
  -4   9  -5    3.83    1.86
  -4  -9  -6   88.18    8.72
  -4   9  -6   94.11    7.36
  -4   9  -6   78.83    6.53
  -4   9  -6  100.20    6.60
  -4  -9  -7    6.44    2.83
  -4   9  -7    3.49    2.05
  -4   9  -7    5.13    1.72
  -4  -9  -8   12.15    2.67
  -4   9  -8    9.91    2.16
  -4   9  -8    8.19    2.10
  -4   9  -9   28.26    2.75
  -4   9  -9   23.83    2.71
  -4  -9  -9   24.68    2.78
  -4   9  -9   26.64    2.47
  -4  10  11    5.35    1.79
  -4 -10  11   -0.17    1.72
  -4 -10  10   31.93    4.15
  -4  10  10   28.17    3.00
   4 -10  -9   56.53    5.33
  -4  10   9   65.05    5.14
  -4  10   8   28.03    3.43
  -4 -10   8   19.15    4.80
   4 -10  -8   25.53    4.02
  -4  10   7    4.32    2.30
  -4 -10   7    5.52    4.08
   4 -10  -7    7.02    3.06
   4 -10  -6  318.70   19.27
  -4 -10   6  304.36   19.63
  -4  10   6  307.63   18.35
  -4 -10   5   13.58    3.67
  -4  10   5   14.17    2.84
   4 -10  -5   17.12    3.81
   4 -10  -4  111.66    8.84
  -4 -10   4  107.12    8.47
  -4  10   4  110.54    7.80
  -4  10   3    4.43    2.34
  -4 -10   3    1.47    2.38
  -4 -10   3    4.43    2.97
  -4  10   2   77.99    6.23
  -4 -10   2   80.04    7.02
  -4 -10   2   82.81    7.71
  -4 -10   1    2.53    2.81
  -4 -10   1    4.47    3.36
  -4 -10   0  195.76   14.32
  -4 -10   0  235.71   14.05
  -4  10  -1    3.70    2.29
  -4 -10  -1    6.93    3.78
  -4  10  -2  290.98   17.49
  -4 -10  -2  282.20   19.10
  -4  10  -3    7.09    2.29
  -4 -10  -3    1.03    3.22
  -4 -10  -3    5.00    4.52
  -4  10  -3    2.51    1.81
  -4  10  -4   69.39    5.65
  -4 -10  -4   61.82    7.54
  -4 -10  -4   58.27    7.88
  -4  10  -4   61.19    5.11
  -4  10  -5  116.21    7.84
  -4 -10  -5   76.15    9.23
  -4  10  -5  124.37    7.57
  -4 -10  -5   88.62    9.33
  -4 -10  -6  385.01   24.78
  -4  10  -6  421.49   23.57
  -4  10  -6  396.49   22.70
  -4 -10  -7    0.34    2.35
  -4  10  -7    0.24    1.58
  -4  10  -7    1.12    1.36
  -4 -10  -8  198.18   11.99
  -4  10  -8  202.18   11.70
  -4  10  -8  210.52   11.78
  -4 -10  -8  168.13   11.32
  -4 -11  10  414.17   21.83
  -4  11  10  362.66   21.06
  -4 -11   9   12.96    3.21
  -4  11   9   13.29    2.19
  -4  11   8   11.35    2.36
   4 -11  -8    6.88    2.54
  -4 -11   8    9.64    3.75
  -4 -11   7    4.25    3.37
  -4  11   7    5.05    2.15
   4 -11  -7    4.95    2.76
   4 -11  -6   55.32    5.70
  -4 -11   6   65.29    6.60
  -4  11   6   54.73    4.91
   4 -11  -5  397.37   23.53
  -4 -11   5  409.75   23.80
  -4  11   5  386.65   22.71
  -4 -11   4   16.81    3.65
  -4  11   4   24.46    3.37
  -4 -11   4   30.15    6.60
   4 -11  -4   26.17    4.01
  -4  11   4   22.64    3.12
  -4  11   3   -0.72    1.91
  -4 -11   3    1.30    2.60
  -4 -11   3    2.58    4.34
  -4  11   3   -1.13    2.11
  -4  11   2   38.74    3.99
  -4 -11   2   45.22    5.70
  -4  11   1   73.39    5.64
  -4 -11   1   55.66    6.25
  -4 -11   1   76.73    6.74
  -4  11   0   47.91    4.59
  -4 -11   0   42.42    5.48
  -4  11  -1  179.64   11.66
  -4 -11  -1  177.08   12.88
  -4  11  -2   46.29    4.53
  -4 -11  -2   42.00    6.10
  -4  11  -3   -1.05    1.86
  -4 -11  -3   -1.54    4.53
  -4  11  -3    0.21    1.59
  -4  11  -4  197.46   11.78
  -4 -11  -4  172.08   13.30
  -4 -11  -4  152.27   13.38
  -4  11  -4  190.39   11.33
  -4  11  -5  144.55    9.23
  -4 -11  -5  128.98   10.69
  -4  11  -5  156.50    8.99
  -4  11  -6  101.47    6.19
  -4 -11  -6   70.56    7.30
  -4 -11  -7   -0.25    1.89
  -4  11  -7    0.37    1.13
  -4 -12   9  367.46   19.04
  -4  12   9  309.81   18.27
  -4 -12   8   13.94    3.00
  -4  12   8   13.47    2.07
  -4  12   8   15.15    2.19
  -4 -12   7    2.94    2.81
  -4  12   7    4.71    1.83
  -4 -12   7   -1.00    3.82
  -4  12   7    3.89    1.88
  -4 -12   6   32.20    4.47
  -4  12   6   34.68    3.46
  -4  12   6   32.22    3.43
  -4  12   5    5.38    2.11
  -4 -12   5    3.39    5.39
  -4  12   4    0.43    1.74
  -4 -12   4   -1.35    4.92
  -4  12   3  214.65   12.89
  -4 -12   3  202.30   14.50
  -4 -12   2   39.90    4.90
  -4 -12   2   41.80    5.52
  -4  12   1  229.92   14.92
  -4 -12   1  257.50   15.97
  -4  12   0    6.43    2.04
  -4 -12   0   13.94    3.46
  -4  12  -1  100.51    7.22
  -4 -12  -1   95.52    8.30
  -4  12  -2  118.06    7.82
  -4 -12  -2  106.35    9.27
  -4  12  -2  103.29    7.32
  -4  12  -3  197.82   11.89
  -4 -12  -3  172.91   13.40
  -4  12  -3  190.04   11.47
  -4  12  -4    2.84    1.74
  -4 -12  -4    8.47    3.82
  -4  12  -4    6.55    1.64
  -4 -12  -5   57.41    6.12
  -4  12  -5   71.72    4.72
  -4 -12  -5   58.15    5.80
  -4 -12  -6  111.03    8.31
  -4  12  -6  127.38    7.41
  -4  13   7   84.28    4.24
  -4  13   7   77.66    4.17
  -4  13   6   19.82    2.29
  -4 -13   6    7.69    3.90
  -4  13   5  595.73   25.74
  -4 -13   5  285.57   26.11
  -4  13   4    1.89    1.58
  -4 -13   4    3.44    4.12
  -4  13   3    9.40    2.09
  -4 -13   3   10.14    3.92
  -4  13   2   -0.18    2.04
  -4 -13   2   -1.06    3.11
  -4  13   1  301.00   16.59
  -4 -13   1  265.30   17.16
  -4  13   0    2.54    1.67
  -4 -13   0   -2.03    2.80
  -4 -13  -1  120.73    9.04
  -4  13  -2    0.37    1.50
  -4 -13  -2    0.98    2.89
  -4  13  -2   -0.75    1.29
  -4 -13  -3    7.42    3.27
  -4  13  -3    7.69    1.58
  -4 -13  -4    2.53    2.81
  -4  13  -4    0.36    1.10
  -4  14   4    5.93    1.42
  -4 -14   4    0.89    2.79
  -4  14   3  124.07    6.44
  -4 -14   3   59.55    6.73
  -4  14   2    2.28    1.41
  -4  14   1  177.79   10.51
  -4  14   0    2.90    1.30
  -4 -14  -1   61.80    5.25
  -4 -14  -2   18.05    3.07
   5   0 -14   -1.60    1.47
  -5   0  14   -1.84    1.94
   5   0 -13    6.66    2.14
  -5   0  13    2.28    1.80
  -5   0  13    5.99    2.54
   5   0 -12   -0.29    1.99
  -5   0  12    1.40    1.96
  -5   0  12   -2.02    3.26
   5   0 -11  749.15   41.62
  -5   0  11  724.56   42.92
  -5   0  11  738.42   41.57
  -5   0  10   -1.08    3.94
   5   0 -10    0.35    2.41
  -5   0  10    0.34    2.31
   5   0  -9  282.29   16.59
  -5   0   9  224.04   17.26
  -5   0   9  262.95   16.37
  -5   0   8    2.18    3.34
   5   0  -8   -0.33    2.17
  -5   0   8   -0.31    1.94
  -5   0   7  166.87   11.62
  -5   0   7  174.48   11.23
  -5   0   7  153.60   15.02
  -5   0   6    0.99    1.70
  -5   0   6    0.79    3.02
  -5   0   6    0.58    2.07
  -5   0   5   25.55    4.81
  -5   0   4    1.21    2.57
  -5   0   4    0.60    2.67
  -5   0   3   58.97    7.01
  -5   0   3   68.25    7.31
  -5   0   2    5.58    2.48
  -5   0   2   -1.15    3.12
  -5   0   1  457.16   28.05
  -5   0   1  443.55   28.19
  -5   0   0   -1.17    2.72
  -5   0   0    0.56    2.38
  -5   0  -1   -1.23    2.75
  -5   0  -1    5.96    2.87
  -5   0  -2   -0.66    2.88
  -5   0  -2    3.33    3.32
  -5   0  -3 2201.39  116.75
  -5   0  -3 2058.16  112.83
  -5   0  -3 2075.51  112.33
  -5   0  -3 2124.36  112.66
  -5   0  -4    1.59    3.12
  -5   0  -4   -0.26    2.00
  -5   0  -4    1.35    2.08
  -5   0  -4   -0.28    1.86
  -5   0  -4   -0.35    2.56
  -5   0  -5   88.64    8.15
  -5   0  -5   97.50    9.05
  -5   0  -5   89.46    7.09
  -5   0  -5   97.76    7.24
  -5   0  -6   -1.25    3.53
  -5   0  -6    1.46    3.29
  -5   0  -6   -1.59    2.21
  -5   0  -6    0.39    2.36
  -5   0  -7  401.08   25.62
  -5   0  -7  375.52   26.16
  -5   0  -7  419.57   23.77
  -5   0  -7  433.31   25.04
  -5   0  -8    3.60    3.27
  -5   0  -8    0.90    3.32
  -5   0  -8    1.62    1.79
  -5   0  -8    1.11    2.39
  -5   0  -9   32.22    4.64
  -5   0  -9   37.23    4.27
  -5   0 -10    0.77    1.88
  -5   0 -11   97.32    6.61
   5  -1 -14   24.27    2.74
   5   1 -14   27.81    2.84
  -5  -1  14   29.85    3.22
  -5   1  14   24.98    3.07
   5  -1 -13  624.66   33.68
   5   1 -13  590.38   33.67
  -5  -1  13  628.50   34.40
  -5   1  13  593.95   34.03
  -5  -1  13  582.83   33.62
   5  -1 -12    6.13    2.14
   5   1 -12    4.16    2.28
  -5   1  12   10.61    2.30
  -5  -1  12    6.57    2.35
  -5  -1  12    5.14    3.29
  -5   1  12    5.17    2.76
  -5   1  11    2.67    3.22
   5  -1 -11    4.08    2.39
   5   1 -11    2.36    2.39
  -5  -1  11   10.84    4.56
  -5   1  11    2.47    2.11
  -5  -1  11    4.26    2.30
   5  -1 -10  395.40   22.52
   5   1 -10  386.76   22.65
  -5   1  10  373.94   23.59
  -5   1  10  379.15   22.42
  -5  -1  10  432.05   22.93
   5   1  -9  182.68   11.94
  -5  -1   9  151.57   13.09
  -5   1   9  160.31   12.47
  -5   1   9  192.12   11.84
  -5  -1   9  159.89   11.58
   5   1  -8  171.08   11.18
  -5  -1   8  154.90   11.91
  -5   1   8  155.97   11.48
  -5   1   8  154.12   10.71
  -5  -1   8  157.93   10.91
   5   1  -7  394.80   24.40
  -5  -1   7  435.79   25.12
  -5   1   7  431.89   24.88
  -5   1   7  439.50   24.47
  -5  -1   7  448.51   24.61
  -5   1   7  361.84   28.22
  -5  -1   7  343.63   28.50
  -5  -1   6  196.23   13.55
  -5  -1   6  223.53   13.45
  -5   1   6  216.26   13.31
  -5   1   6  221.00   13.11
  -5   1   6  184.18   16.06
  -5  -1   6  175.49   16.03
  -5  -1   5   80.49    9.80
  -5   1   5   81.88    8.65
  -5  -1   5   81.57    8.77
  -5   1   4   65.82    7.12
  -5  -1   4   48.17    6.40
  -5  -1   4   54.87    6.83
  -5   1   3  146.83   12.14
  -5  -1   3  151.23   12.26
  -5  -1   3  172.56   12.87
  -5   1   2  152.28   11.74
  -5  -1   2  138.68   11.47
  -5  -1   2  153.11   12.20
  -5   1   1  642.80   40.24
  -5  -1   1  689.90   40.54
  -5  -1   1  739.26   41.60
  -5   1   0   26.02    4.64
  -5  -1   0   33.45    5.11
  -5   1   0   28.03    5.92
  -5  -1  -1   41.98    6.26
  -5   1  -1   51.63    6.27
  -5   1  -1   37.67    5.63
  -5  -1  -1   49.63    6.31
  -5   1  -2  244.87   17.74
  -5  -1  -2  207.18   17.12
  -5  -1  -2  224.48   17.74
  -5   1  -2  237.94   17.43
  -5  -1  -2  183.94   16.82
  -5   1  -2  252.98   14.79
  -5  -1  -2  249.21   14.82
  -5   1  -2  259.44   14.74
  -5  -1  -2  242.53   14.73
  -5   1  -3    7.27    2.39
  -5  -1  -3    9.55    2.79
  -5  -1  -3    7.57    3.39
  -5   1  -3    9.23    3.63
  -5  -1  -3   -0.83    3.28
  -5   1  -3   10.71    2.33
  -5   1  -3    8.05    2.35
  -5  -1  -3    9.28    2.50
  -5   1  -4    3.14    3.41
  -5  -1  -4    4.13    4.29
  -5   1  -4    2.40    3.02
  -5   1  -4    0.81    1.90
  -5   1  -4    2.12    2.23
  -5  -1  -4    4.12    2.28
  -5   1  -4    5.04    2.15
  -5   1  -4    0.27    1.88
  -5  -1  -4   -0.28    2.03
  -5   1  -4    1.75    2.59
  -5  -1  -4   -2.15    2.68
  -5   1  -5   20.81    4.66
  -5  -1  -5   27.20    4.97
  -5  -1  -5   21.29    3.44
  -5   1  -5   18.85    3.11
  -5   1  -5   21.46    3.37
  -5  -1  -5   31.33    3.87
  -5   1  -5   27.51    4.43
  -5  -1  -5   34.25    5.08
  -5   1  -6   32.54    5.79
  -5  -1  -6   39.84    6.13
  -5   1  -6   43.37    4.10
  -5   1  -6   28.90    5.13
  -5  -1  -6   32.14    5.34
  -5  -1  -6   33.49    4.05
  -5  -1  -6   36.13    4.36
  -5  -1  -6   36.57    4.63
  -5   1  -7  717.37   43.30
  -5  -1  -7  698.61   43.36
  -5   1  -7  731.41   44.16
  -5  -1  -7  719.49   44.37
  -5  -1  -7  784.60   41.75
  -5   1  -7  767.44   41.56
  -5  -1  -7  769.69   42.75
  -5   1  -7  756.92   42.85
  -5   1  -8    2.94    2.88
  -5  -1  -8   -1.05    2.85
  -5   1  -8    3.94    3.20
  -5  -1  -8   -0.90    3.37
  -5   1  -8   -0.68    1.65
  -5  -1  -8    0.71    2.30
  -5   1  -8   -0.38    2.52
  -5   1  -9   72.75    6.55
  -5  -1  -9   73.56    6.57
  -5   1  -9   63.17    5.11
  -5  -1  -9   58.79    5.79
  -5   1  -9   78.15    6.32
  -5  -1 -10   20.48    2.86
  -5   1 -10   16.51    2.84
  -5   1 -11  573.74   31.71
   5   2 -14   29.56    2.89
  -5  -2  14   29.44    3.14
  -5  -2  14   25.33    2.80
  -5   2  14   24.39    2.89
   5  -2 -13   15.49    2.57
   5   2 -13   20.00    2.89
  -5  -2  13   19.46    2.81
  -5  -2  13   16.47    3.42
  -5   2  13   17.81    3.06
   5  -2 -12  188.43   12.57
   5   2 -12  197.65   12.90
  -5  -2  12  228.87   14.49
  -5   2  12  205.21   13.30
  -5  -2  12  199.14   12.90
   5  -2 -11  391.30   21.14
   5   2 -11  332.17   21.10
  -5  -2  11  339.46   22.89
  -5   2  11  340.78   21.54
  -5  -2  11  344.58   21.17
  -5  -2  10   22.21    6.15
  -5   2  10   25.31    4.57
   5   2 -10   29.50    4.24
  -5  -2  10   23.05    3.89
  -5  -2   9   19.07    4.77
  -5   2   9   19.27    3.92
   5   2  -9   12.91    3.40
  -5   2   9   19.59    3.22
  -5  -2   9   13.28    3.25
   5   2  -8   72.27    6.42
  -5  -2   8   79.22    7.82
  -5   2   8   75.43    6.78
  -5  -2   8   68.36    6.43
   5   2  -7   73.42    6.44
  -5  -2   7   82.86    7.24
  -5   2   7   81.89    6.69
  -5   2   7   75.39    9.50
  -5  -2   7   74.73   10.06
   5   2  -6  860.85   48.26
  -5  -2   6  845.53   54.28
  -5  -2   6  877.43   48.50
  -5   2   6  890.20   48.38
  -5   2   6  912.38   52.30
  -5  -2   6  853.77   52.33
  -5  -2   5   20.59    3.26
  -5  -2   5   15.63    4.58
  -5  -2   5   15.20    2.96
  -5  -2   5   15.18    3.40
  -5   2   5   16.00    4.31
  -5  -2   5    9.43    3.40
  -5  -2   5   16.48    2.70
  -5   2   5   16.20    2.71
  -5  -2   5    7.95    3.81
  -5  -2   4  291.76   21.05
  -5   2   4  285.09   19.96
  -5  -2   4  274.83   19.81
  -5  -2   4  332.66   20.96
  -5   2   3  200.73   15.14
  -5  -2   3  206.98   15.13
  -5  -2   3  219.94   15.79
  -5   2   2 1408.01   82.41
  -5   2   2 1427.69   81.24
  -5  -2   2 1469.32   81.37
   5  -2  -2 1435.95   81.75
  -5  -2   2 1560.65   82.46
  -5   2   1   61.03    6.53
  -5  -2   1   66.39    6.84
  -5   2   1   47.02    7.58
  -5  -2   1   80.67    8.02
  -5   2   0  357.62   25.88
  -5   2   0  424.16   29.09
  -5   2  -1   95.61    9.09
  -5  -2  -1   92.82    9.40
  -5   2  -1   90.62   11.30
  -5   2  -2   75.42    8.34
  -5  -2  -2   68.61    5.88
  -5  -2  -2   51.35    7.48
  -5   2  -2   74.51    5.87
  -5  -2  -2   74.64    6.01
  -5   2  -2   80.20    5.75
  -5  -2  -2   80.27    6.18
  -5   2  -3  792.63   43.43
  -5  -2  -3  659.55   43.65
  -5   2  -3  748.49   39.76
  -5  -2  -3  688.83   39.69
  -5   2  -3  645.35   38.67
  -5   2  -3  753.65   39.31
  -5  -2  -3  719.52   39.61
  -5   2  -4    1.56    2.98
  -5  -2  -4   -1.08    4.12
  -5   2  -4    1.64    1.91
  -5   2  -4    2.39    2.25
  -5   2  -4    3.12    2.14
  -5  -2  -4    2.67    2.34
  -5   2  -4   -1.42    2.77
  -5  -2  -4    1.84    2.94
  -5   2  -5   -0.60    3.63
  -5  -2  -5    0.54    3.13
  -5   2  -5    1.54    2.10
  -5   2  -5    0.25    1.84
  -5   2  -5    0.85    2.87
  -5  -2  -5    3.01    2.44
  -5  -2  -5   -3.54    3.02
  -5   2  -6   32.40    5.86
  -5  -2  -6   46.69    6.74
  -5   2  -6   44.75    5.99
  -5  -2  -6   55.22    6.44
  -5   2  -6   52.68    4.57
  -5  -2  -6   51.99    4.96
  -5   2  -7  343.78   23.24
  -5  -2  -7  366.96   23.60
  -5   2  -7  385.68   24.21
  -5  -2  -7  340.57   24.21
  -5   2  -7  393.93   21.73
  -5   2  -7  390.68   23.04
  -5  -2  -8   33.91    5.48
  -5   2  -8   40.90    5.36
  -5  -2  -8   39.61    5.38
  -5   2  -8   41.97    3.84
  -5   2  -8   36.37    4.59
  -5   2  -9   12.69    3.03
  -5  -2  -9   16.12    3.34
  -5   2  -9   11.14    2.13
  -5   2  -9   12.73    2.88
  -5   2 -10   30.80    3.51
  -5   2 -11   18.49    2.42
   5   3 -14  164.97    9.70
  -5  -3  14  153.82    9.68
   5   3 -13    7.35    1.98
  -5  -3  13    5.09    1.85
   5   3 -12    2.31    2.06
  -5  -3  12    0.86    1.90
   5   3 -11   30.53    4.13
  -5  -3  11   31.70    4.14
  -5  -3  11   34.35    5.87
   5   3 -10  435.00   26.04
  -5  -3  10  440.38   26.19
   5   3  -9    2.89    2.58
  -5  -3   9   -0.94    4.25
  -5  -3   9    1.99    2.53
   5   3  -8  477.39   27.25
  -5  -3   8  446.21   27.77
   5   3  -7  382.15   22.99
  -5  -3   7  400.18   23.65
  -5  -3   6  492.77   35.22
  -5  -3   6  526.55   29.77
  -5  -3   5    7.64    4.21
  -5  -3   5   17.12    2.98
  -5  -3   5   10.77    3.23
  -5  -3   5   18.92    4.81
  -5  -3   4  368.75   24.75
  -5  -3   4  346.84   20.30
  -5  -3   4  347.63   23.78
  -5   3   3   91.94    9.85
   5  -3  -3   97.10    9.86
  -5  -3   3  123.45   10.61
  -5   3   2  183.02   15.53
   5  -3  -2  211.03   15.53
  -5  -3   2  201.57   15.71
  -5   3   1  266.70   19.86
   5  -3  -1  250.57   18.27
  -5   3   0    8.94    4.81
  -5   3  -1    9.49    5.84
  -5  -3  -1    7.98    2.35
  -5  -3  -2 1326.44   71.64
  -5   3  -2 1348.27   74.65
  -5  -3  -2 1286.59   71.08
  -5  -3  -2 1199.40   75.08
  -5   3  -2 1352.63   71.02
  -5   3  -3   72.43    8.14
  -5  -3  -3   65.13    8.68
  -5   3  -3   51.33    4.60
  -5   3  -3   62.32    5.16
  -5  -3  -3   53.07    5.40
  -5   3  -4    4.84    2.20
  -5   3  -4    5.63    2.35
  -5  -3  -4    0.94    2.33
  -5  -3  -5   32.14    5.38
  -5   3  -5   25.24    3.41
  -5  -3  -5   35.22    4.30
  -5  -3  -6  335.93   23.73
  -5   3  -6  378.90   21.18
  -5   3  -6  373.48   21.15
  -5  -3  -6  393.20   21.82
  -5  -3  -7   45.05    6.63
  -5  -3  -7   45.75    6.05
  -5   3  -7   54.93    4.54
  -5   3  -7   49.35    5.57
  -5  -3  -8   18.41    4.07
  -5  -3  -8   21.23    4.03
  -5   3  -8   19.26    3.13
  -5   3  -8   19.58    2.69
  -5   3  -8   19.29    3.50
  -5  -3  -9   13.26    3.02
  -5   3  -9   15.86    2.65
  -5   3  -9   14.92    2.30
  -5   3  -9   12.01    2.63
  -5   3 -10    6.77    1.84
  -5   3 -10   10.23    1.77
  -5   3 -10    6.68    2.05
  -5   3 -11   30.02    2.81
  -5   3 -11   30.94    2.89
  -5  -4  14    2.38    1.23
   5   4 -13    1.62    1.60
  -5  -4  13    1.04    1.57
   5   4 -12  362.11   20.26
  -5  -4  12  320.18   20.13
   5   4 -11   14.47    3.07
  -5  -4  11   18.04    4.61
  -5  -4  11   10.45    3.06
   5   4 -10    2.86    2.66
  -5  -4  10    2.57    4.68
  -5  -4  10    6.08    2.92
   5   4  -9    5.78    2.80
  -5  -4   9    8.03    5.17
   5   4  -8  138.25    9.79
  -5  -4   8  121.39   10.63
   5   4  -7   61.10    5.67
  -5  -4   7   56.32    6.48
  -5  -4   6 1016.30   57.05
  -5  -4   6 1056.87   57.70
  -5  -4   6 1037.28   61.95
  -5  -4   5  148.22   15.41
  -5  -4   5  172.49   11.47
  -5  -4   5  195.27   12.30
  -5  -4   5  173.54   15.07
  -5  -4   4   97.42   11.09
  -5  -4   4  111.63    7.92
  -5  -4   4  129.43    8.71
  -5  -4   4   93.01   10.22
  -5  -4   3  220.81   13.33
  -5   4   3  215.66   15.60
  -5   4   3  204.52   16.39
  -5  -4   3  208.17   13.06
  -5  -4   3  209.96   13.49
   5  -4  -3  219.24   16.79
  -5  -4   3  210.04   16.39
  -5   4   2 1695.31   92.39
  -5  -4   2 1698.08   89.86
  -5   4   2 1678.82   94.16
  -5  -4   2 1636.30   89.58
   5  -4  -2 1806.16   94.04
  -5  -4   2 1607.10   89.93
  -5  -4   2 1648.63   93.63
  -5  -4   1  164.85   11.37
  -5   4   1  171.22   13.34
  -5   4   1  184.60   15.82
  -5  -4   1  175.66   11.27
   5  -4  -1  167.86   14.28
  -5  -4   1  198.37   12.02
  -5   4   0   45.47    8.41
  -5  -4   0   40.94    4.25
   5  -4   0   38.25    6.20
  -5  -4   0   51.55    5.22
  -5  -4  -1  165.12   10.52
  -5   4  -1  181.18   17.74
  -5  -4  -1  136.62    9.82
   5  -4   1  150.63   13.30
  -5  -4  -2   37.43    4.33
  -5   4  -2   21.14    7.78
  -5  -4  -2   41.95    4.23
  -5  -4  -2   27.31    5.87
  -5   4  -2   39.15    3.92
  -5  -4  -3    3.67    2.37
  -5   4  -3    2.14    1.97
  -5   4  -3    4.03    2.12
  -5   4  -3    3.18    2.09
  -5   4  -4    1.31    1.87
  -5   4  -4    0.96    1.97
  -5   4  -4    0.22    1.99
  -5   4  -4   -0.81    2.10
  -5   4  -5   27.99    3.97
  -5   4  -5   36.32    3.83
  -5  -4  -5   31.07    4.13
  -5   4  -6  159.94   10.46
  -5  -4  -6  162.31   11.04
  -5   4  -7    1.36    1.56
  -5  -4  -7    2.88    2.19
  -5   4  -7    2.95    2.61
  -5   4  -8   50.21    4.94
  -5   4  -8   48.96    4.33
  -5   4  -8   60.05    5.49
  -5   4  -9    6.96    2.14
  -5   4  -9    8.09    1.79
  -5   4  -9    4.91    2.22
  -5   4 -10   51.26    4.14
  -5   4 -10   41.99    3.53
  -5   4 -10   43.94    3.99
  -5  -5  13  117.36    7.72
  -5  -5  13  110.03    7.51
   5   5 -12  164.28   11.22
  -5  -5  12  174.55   11.97
  -5  -5  12  194.29   11.64
   5   5 -11   65.90    5.92
  -5  -5  11   65.36    7.43
   5   5 -10  358.98   20.60
  -5  -5  10  298.44   21.84
   5   5  -9  203.60   12.59
   5  -5  -9  179.05   12.02
   5   5  -8   94.79    7.57
  -5  -5   8   83.32    9.03
   5   5  -7    3.80    2.46
  -5  -5   7    1.27    3.81
  -5  -5   6  209.69   13.68
  -5  -5   6  200.98   13.94
  -5  -5   5  211.15   13.51
  -5  -5   5  215.75   14.15
  -5  -5   4  175.11   11.60
  -5  -5   4  195.40   12.34
  -5  -5   4  169.63   14.84
  -5   5   3   10.24    3.33
  -5   5   3    6.12    2.98
  -5   5   3    4.65    3.47
  -5  -5   3    5.38    2.48
  -5  -5   3    6.55    2.64
   5  -5  -3   12.95    4.13
  -5  -5   3   10.96    3.51
  -5  -5   3   10.34    4.07
  -5  -5   2  319.02   19.30
  -5   5   2  342.62   22.14
  -5   5   2  325.92   23.48
  -5  -5   2  323.24   19.06
  -5  -5   2  330.08   19.53
   5  -5  -2  330.57   23.22
  -5  -5   2  323.23   19.55
  -5   5   1    8.57    2.90
  -5   5   1    1.92    3.68
  -5  -5   1    5.43    2.47
   5  -5  -1    3.87    3.38
  -5  -5   1    3.04    2.28
  -5  -5   1    3.59    2.96
  -5   5   0   -0.62    2.15
  -5   5   0    5.73    4.99
  -5  -5   0    2.73    2.05
   5  -5   0    2.36    2.83
  -5  -5   0    0.83    2.84
  -5  -5  -1   14.82    3.12
  -5   5  -1   17.31    3.96
  -5  -5  -1   18.13    3.05
  -5  -5  -1   18.73    4.97
  -5  -5  -2  912.67   51.70
  -5   5  -2  939.15   54.21
  -5   5  -2  923.25   51.20
  -5  -5  -3   68.15    6.94
  -5   5  -3   76.83    6.47
  -5  -5  -4   77.98    7.49
  -5   5  -4   74.41    6.62
  -5   5  -4   70.28    5.86
  -5   5  -4   84.13    6.12
  -5   5  -5   76.66    6.77
  -5   5  -5   72.89    5.80
  -5   5  -5   77.68    6.05
  -5   5  -6   46.85    4.92
  -5   5  -6   54.43    4.73
  -5  -5  -6   38.66    4.82
  -5   5  -7  138.74   10.20
  -5   5  -7  151.60    9.56
  -5  -5  -7  151.42   10.13
  -5   5  -8  215.15   12.93
  -5   5  -9  123.05    8.22
  -5   5  -9  115.22    7.56
  -5   5 -10    1.45    1.36
  -5   5 -10   -1.02    1.15
  -5  -6  13    3.55    1.87
  -5  -6  12  129.61    9.28
   5   6 -11  225.91   14.81
  -5  -6  11  268.42   16.48
   5   6 -10   15.28    3.24
  -5  -6  10   26.56    6.04
   5   6  -9   17.60    3.41
  -5  -6   9   14.20    5.84
   5  -6  -9   21.64    3.77
   5   6  -8  362.55   22.45
  -5  -6   8  402.81   24.49
   5  -6  -8  366.67   22.47
   5   6  -7   41.12    4.71
  -5  -6   7   56.14    6.54
  -5  -6   7   36.32    5.57
   5  -6  -7   46.99    5.33
  -5  -6   6  213.51   14.21
  -5  -6   6  217.71   14.59
   5  -6  -6  213.58   14.39
  -5  -6   5  114.64    8.55
  -5  -6   5  117.39    9.08
  -5  -6   4   52.67    4.83
  -5  -6   4   47.74    5.21
  -5  -6   4   41.63    4.75
  -5  -6   3    5.98    2.38
  -5  -6   3    4.38    2.37
  -5  -6   3    3.53    2.50
  -5  -6   3    1.69    3.70
  -5  -6   2  490.51   28.46
  -5   6   2  480.86   31.36
  -5  -6   2  483.16   28.08
  -5  -6   2  530.61   28.89
  -5  -6   2  499.12   28.81
  -5   6   1  334.60   23.21
  -5  -6   1  344.61   20.08
  -5  -6   1  341.81   20.69
  -5  -6   1  350.13   20.67
  -5  -6   0   87.85    7.30
  -5  -6  -1   20.17    3.64
  -5  -6  -1   20.37    4.01
  -5  -6  -2   19.81    3.91
  -5   6  -2   24.66    3.61
  -5  -6  -3  512.82   32.96
  -5   6  -3  589.21   32.26
  -5  -6  -4  117.42   10.36
  -5   6  -4  123.09    9.23
  -5   6  -4  125.59    8.46
  -5   6  -4  125.78    8.54
  -5  -6  -5   58.26    6.91
  -5   6  -5   57.28    5.81
  -5   6  -5   60.60    5.08
  -5   6  -5   74.49    5.47
  -5   6  -6  421.68   25.45
  -5   6  -6  436.28   24.59
  -5   6  -7   74.42    6.14
  -5  -6  -7   63.92    5.75
  -5   6  -8   40.34    4.30
  -5   6  -8   54.90    4.20
  -5   6  -9   -0.43    1.48
  -5   6  -9    2.86    1.40
  -5   6 -10   24.61    2.58
  -5   6 -10   25.86    2.33
  -5  -7  12  412.95   23.71
  -5  -7  11    0.72    3.52
   5   7 -10    8.53    2.51
  -5  -7  10    2.92    4.59
   5  -7 -10    2.14    2.21
   5   7  -9   61.01    5.62
  -5  -7   9   43.73    7.63
   5  -7  -9   58.89    5.58
   5   7  -8   20.72    3.61
  -5  -7   8   26.10    5.96
   5  -7  -8   33.12    4.32
   5   7  -7  279.83   18.96
  -5  -7   7  350.35   20.58
  -5  -7   7  322.52   20.22
   5  -7  -7  324.88   19.69
  -5  -7   6   29.55    4.84
  -5  -7   6   28.72    4.70
  -5  -7   6   20.72    4.41
   5  -7  -6   22.35    4.23
  -5  -7   5   44.92    5.31
  -5  -7   5   40.81    4.89
  -5  -7   5   42.39    5.18
   5  -7  -5   40.28    5.43
  -5  -7   4    1.84    2.62
  -5  -7   4   -0.27    2.46
  -5  -7   4    1.78    2.96
  -5  -7   4    2.56    4.28
   5  -7  -4    2.19    3.37
  -5  -7   3   76.85    6.57
  -5  -7   3   63.60    6.99
  -5  -7   3   60.07    5.68
  -5  -7   2  105.34    8.78
  -5  -7   2  136.31    9.52
  -5  -7   1  195.92   12.85
  -5  -7   1  196.27   13.21
  -5  -7   1  196.14   13.11
  -5  -7   0    7.08    3.27
  -5  -7   0    7.93    3.43
  -5  -7  -1   58.26    6.11
  -5   7  -1   52.49    5.46
  -5  -7  -1   59.07    5.90
  -5  -7  -2  205.39   14.66
  -5   7  -2  210.76   13.81
  -5  -7  -3    0.55    3.40
  -5   7  -3    2.55    2.34
  -5  -7  -4  192.64   15.71
  -5   7  -4  229.11   14.71
  -5   7  -4  224.84   13.63
  -5   7  -4  228.39   13.67
  -5  -7  -5    0.56    3.60
  -5   7  -5    1.80    2.00
  -5   7  -5    4.03    1.92
  -5   7  -5   -0.23    2.12
  -5  -7  -6    4.59    3.03
  -5   7  -6    4.69    2.31
  -5   7  -6    7.91    1.93
  -5   7  -6    8.93    2.43
  -5   7  -7  334.76   18.86
  -5  -7  -7  290.40   18.26
  -5   7  -8  333.14   19.75
  -5   7  -8  342.61   19.21
  -5   7  -9   25.20    2.74
  -5   7  -9   23.02    2.77
  -5   7  -9   30.22    2.59
  -5  -8  12   27.81    3.11
  -5   8  12   24.89    2.49
  -5  -8  11  528.49   27.15
  -5   8  11  435.61   25.76
  -5   8  10   11.75    2.40
  -5  -8  10   11.57    4.39
   5  -8 -10   12.57    2.58
   5   8  -9    4.94    2.35
  -5  -8   9   12.80    4.91
   5  -8  -9    8.65    2.89
   5   8  -8  133.31    9.32
  -5  -8   8  134.78   11.03
   5  -8  -8  140.23    9.46
  -5  -8   7    1.02    4.09
   5   8  -7    3.11    2.45
  -5  -8   7    5.86    3.95
  -5  -8   7    5.02    3.45
   5  -8  -7    2.77    3.12
  -5  -8   6   21.94    4.66
  -5  -8   6   18.85    4.09
  -5  -8   6   20.51    4.11
   5  -8  -6   17.30    4.15
  -5  -8   5   30.89    4.55
  -5  -8   5   19.17    4.10
  -5  -8   5   33.21    6.62
   5  -8  -5   28.05    4.69
  -5  -8   4  175.72   12.57
  -5  -8   4  176.88   13.84
  -5  -8   4  195.16   12.45
  -5  -8   3  516.23   32.26
  -5  -8   3  624.45   33.40
  -5  -8   2   28.83    4.26
  -5  -8   2   20.16    4.81
  -5  -8   1    4.18    3.10
  -5  -8   1    5.31    3.26
  -5   8   0  193.29   13.14
  -5  -8   0  203.77   13.89
  -5  -8   0  202.62   13.21
  -5  -8  -1   91.41    8.58
  -5   8  -1  110.20    8.36
  -5  -8  -1  110.64    9.45
  -5  -8  -1  106.95    8.30
  -5  -8  -2  201.25   13.87
  -5   8  -2  173.21   12.35
  -5  -8  -3  430.08   24.79
  -5   8  -3  386.43   22.55
  -5   8  -4   94.34    7.49
  -5  -8  -4  118.39   10.59
  -5   8  -4   92.18    8.15
  -5   8  -4  107.38    7.44
  -5   8  -4  125.63    7.68
  -5  -8  -5    3.46    3.82
  -5   8  -5    4.80    2.41
  -5   8  -5    3.61    1.84
  -5   8  -5    3.80    2.14
  -5   8  -6   58.90    5.46
  -5   8  -6   53.32    4.56
  -5   8  -6   58.11    4.82
  -5  -8  -7  255.04   15.18
  -5   8  -7  251.78   14.70
  -5  -8  -7  215.48   14.15
  -5   8  -8    0.61    1.44
  -5   8  -8   -0.40    1.44
  -5   8  -8    1.98    1.22
  -5  -8  -8    1.51    1.42
  -5   8  -9   19.09    2.21
  -5  -9  11  182.67   10.56
  -5   9  11  152.48    9.61
  -5  -9  10  130.86    8.90
   5  -9 -10  104.60    7.48
  -5   9  10  113.35    7.41
  -5   9   9    7.81    2.22
  -5  -9   9    8.59    4.12
  -5  -9   9    5.54    3.80
   5  -9  -9    5.03    2.34
  -5  -9   8   54.14    7.32
   5  -9  -8   62.85    5.78
  -5   9   8   74.73    5.51
   5   9  -7  817.38   50.50
  -5  -9   7  880.36   52.22
  -5   9   7  946.05   50.19
  -5  -9   6   42.48    5.76
  -5  -9   6   36.03    5.13
   5  -9  -6   40.25    4.96
  -5  -9   5    3.79    3.23
  -5  -9   5    3.38    3.16
  -5  -9   5    7.64    5.72
   5  -9  -5    7.54    3.27
  -5  -9   4   10.01    3.15
  -5  -9   4    9.22    3.38
  -5  -9   4   19.96    5.69
  -5  -9   3  176.80   13.12
  -5  -9   3  233.01   14.73
  -5  -9   2    2.26    3.03
  -5  -9   2    2.28    3.66
  -5  -9   1  367.48   23.89
  -5  -9   1  421.54   23.78
  -5  -9   0   18.41    4.38
  -5  -9   0   17.02    3.76
  -5  -9  -1  100.43    9.71
  -5  -9  -1  116.90    8.68
  -5   9  -2   31.51    3.81
  -5  -9  -2   34.40    5.33
  -5   9  -2   27.93    3.98
  -5  -9  -2   34.71    5.90
  -5   9  -3  110.64    8.40
  -5  -9  -3  139.51   11.21
  -5   9  -3  131.93    9.39
  -5   9  -4   16.90    2.85
  -5  -9  -4   29.87    5.47
  -5   9  -4   23.14    3.54
  -5   9  -4   24.64    2.98
  -5   9  -4   28.18    3.23
  -5   9  -5   40.10    3.89
  -5  -9  -5   38.29    5.92
  -5   9  -5   40.57    4.45
  -5   9  -5   40.16    3.74
  -5   9  -5   46.03    3.93
  -5  -9  -6   41.55    5.28
  -5   9  -6   36.19    4.00
  -5   9  -6   41.34    3.59
  -5   9  -7   65.15    5.20
  -5  -9  -7   66.68    5.06
  -5   9  -8   44.84    3.64
  -5   9  -8   49.03    3.74
  -5   9  -8   49.02    3.38
  -5  -9  -8   35.94    3.30
  -5  10  10    3.44    1.44
   5 -10 -10    3.38    1.62
  -5  10   9    6.38    1.75
  -5 -10   9    4.73    3.05
   5 -10  -9    2.43    1.91
  -5  10   8    2.75    1.82
  -5 -10   8    1.22    3.58
   5 -10  -8    1.41    2.36
  -5  10   7    4.77    2.07
  -5 -10   7    6.09    3.84
   5 -10  -7   10.13    3.06
  -5 -10   6  143.78   13.59
   5 -10  -6  183.85   11.64
  -5 -10   6  170.94   12.48
  -5 -10   5  166.43   11.25
  -5 -10   5  158.00   13.74
   5 -10  -5  148.80   10.75
  -5 -10   4   10.88    3.44
  -5 -10   4   12.74    6.08
  -5 -10   3  616.34   38.65
  -5 -10   3  791.73   40.23
  -5 -10   2  161.85   12.44
  -5 -10   2  214.33   13.31
  -5 -10   1   33.60    5.19
  -5 -10   1   47.85    5.41
  -5 -10   0   11.91    3.99
  -5 -10   0   11.43    3.45
  -5  10  -1  545.77   31.42
  -5 -10  -1  570.76   33.31
  -5  10  -2    2.61    2.13
  -5 -10  -2    6.03    4.61
  -5  10  -3  125.93    8.92
  -5 -10  -3  142.26   11.24
  -5 -10  -3  136.12   11.65
  -5  10  -3  134.78    8.67
  -5  10  -4    2.70    1.78
  -5 -10  -4    4.22    3.95
  -5  10  -4    4.60    1.89
  -5  10  -4    3.55    1.63
  -5  10  -4    3.17    1.78
  -5  10  -5   43.61    4.23
  -5 -10  -5   42.80    5.91
  -5  10  -5   57.77    4.90
  -5  10  -5   62.52    4.31
  -5  10  -6   16.01    2.38
  -5 -10  -6   11.89    2.29
  -5  10  -7   91.78    6.21
  -5 -10  -7   78.28    5.98
  -5  11   9   11.84    1.83
  -5  11   9    8.25    1.64
  -5  11   8    3.62    1.56
   5 -11  -8    2.21    1.92
  -5  11   7  457.05   24.46
   5 -11  -7  456.57   24.93
  -5  11   7  402.98   24.23
  -5  11   6   12.29    2.27
  -5 -11   6    8.63    5.82
   5 -11  -6    8.90    2.64
  -5  11   5   -1.20    1.73
  -5 -11   5    2.12    5.78
   5 -11  -5   -0.52    2.32
  -5  11   4   28.95    3.24
  -5 -11   4   19.28    3.84
  -5 -11   4   26.80    6.46
  -5 -11   3  146.48   10.76
  -5 -11   3  169.88   12.24
  -5 -11   2  125.10    9.87
  -5 -11   2  150.24   10.61
  -5  11   1   91.59    6.85
  -5 -11   1   83.38    7.74
  -5 -11   1   91.69    7.56
  -5  11   0   13.69    2.61
  -5 -11   0   15.34    4.16
  -5 -11   0   22.81    3.81
  -5  11  -1   71.27    5.61
  -5 -11  -1   56.71    7.14
  -5  11  -2  158.74   10.19
  -5 -11  -2  153.01   12.39
  -5  11  -3   64.48    5.39
  -5 -11  -3   59.80    7.50
  -5  11  -3   79.79    5.29
  -5  11  -4   13.40    2.29
  -5  11  -4   20.53    2.26
  -5  11  -5  118.51    7.32
  -5 -11  -6    2.15    1.98
  -5 -11  -6    2.57    1.47
  -5  12   7    3.83    1.42
  -5  12   6   71.11    4.53
  -5 -12   6   23.06    5.91
  -5  12   5   57.55    4.26
  -5 -12   5   34.66    6.46
  -5  12   4   64.03    4.66
  -5 -12   4   42.54    6.92
  -5 -12   3  189.51   12.62
  -5 -12   3  205.64   13.65
  -5 -12   2   48.75    5.22
  -5 -12   2   57.01    6.03
  -5  12   1   21.19    2.84
  -5 -12   1   19.93    3.78
  -5 -12   1   26.41    4.05
  -5  12   0   25.63    3.10
  -5 -12   0   30.59    4.66
  -5  12  -1   91.02    6.45
  -5 -12  -1   85.07    7.90
  -5  12  -2   26.87    3.09
  -5 -12  -2   34.64    5.25
  -5  12  -2   34.82    3.06
  -5  12  -3    2.02    1.49
  -5 -12  -3    3.65    3.52
  -5 -12  -4   46.56    5.44
  -5  12  -4   66.36    4.26
  -5  13   5    1.27    1.16
  -5 -13   5    0.81    3.35
  -5  13   4    7.13    1.54
  -5 -13   4    4.84    3.61
  -5 -13   3    2.62    3.18
  -5 -13   2   81.84    6.42
  -5 -13   1    6.76    2.72
  -5  13   0    0.46    1.35
  -5 -13   0    2.25    2.75
  -5  13  -1    4.49    1.48
  -5 -13  -1    2.36    2.86
  -5  13  -2  116.39    6.92
  -5 -13  -2   93.11    8.03
   6   0 -13    0.37    1.45
  -6   0  13    0.24    1.95
   6   0 -12   93.00    6.80
  -6   0  12   92.33    7.71
   6   0 -11   -0.29    1.91
  -6   0  11    3.63    3.54
  -6   0  10   53.97    7.03
  -6   0   9   -2.03    3.61
  -6   0   8 1444.51   79.84
  -6   0   7    1.94    3.06
  -6   0   6  300.31   18.53
  -6   0   5    1.13    2.95
  -6   0   5    1.49    2.05
  -6   0   4 1388.35   75.08
  -6   0   4 1395.41   74.61
  -6   0   4 1284.41   77.99
  -6   0   3    0.62    2.53
  -6   0   3   -1.43    3.12
  -6   0   3    0.27    1.82
  -6   0   2  312.96   19.11
  -6   0   2  292.46   21.75
  -6   0   2  334.94   19.18
  -6   0   1    3.40    1.90
  -6   0   1   -2.15    3.46
  -6   0   0   28.63    5.42
  -6   0   0   26.43    3.65
  -6   0  -1   -0.31    2.29
  -6   0  -1   -0.95    1.94
  -6   0  -1    0.86    2.03
  -6   0  -2    8.71    2.96
  -6   0  -2    8.78    2.53
  -6   0  -2   11.17    2.79
  -6   0  -3   -3.78    3.06
  -6   0  -3    1.42    2.28
  -6   0  -3   -0.62    2.27
  -6   0  -4  568.95   33.81
  -6   0  -4  551.94   34.67
  -6   0  -4  594.32   32.92
  -6   0  -5    2.53    3.70
  -6   0  -5   -0.49    3.72
  -6   0  -6  108.79    9.33
  -6   0  -6   93.54    9.53
  -6   0  -6   98.08    7.37
  -6   0  -6   93.49    8.03
  -6   0  -7   -1.06    3.30
  -6   0  -7   -1.81    3.47
  -6   0  -7    1.07    2.33
  -6   0  -8  135.12    9.61
  -6   0  -8  119.05    9.55
  -6   0  -8  119.66    8.85
  -6   0  -9    1.58    1.82
   6  -1 -13    2.82    1.57
   6   1 -13    0.76    1.50
  -6  -1  13   -0.49    2.10
  -6   1  13    0.22    2.00
   6   1 -12  336.50   19.78
  -6  -1  12  354.99   20.92
  -6   1  12  324.79   20.24
   6   1 -11    2.10    2.14
  -6  -1  11    2.96    3.78
  -6   1  11    3.21    3.13
   6   1 -10  318.65   17.01
  -6   1  10  267.32   17.54
   6   1  -9   13.43    3.13
  -6  -1   9    7.76    4.53
  -6   1   9   15.47    4.31
  -6   1   8   56.65    6.03
  -6  -1   8   44.48    6.17
  -6  -1   7    8.46    3.57
  -6   1   7    8.53    3.14
  -6  -1   6  355.67   22.30
  -6   1   6  392.40   22.46
  -6  -1   5    7.54    3.15
  -6  -1   5    8.88    2.67
  -6   1   5    7.37    2.60
  -6   1   4  882.38   49.36
  -6  -1   4  916.10   49.19
  -6  -1   4  882.89   48.63
  -6   1   4  895.96   48.73
  -6   1   4  861.21   52.28
  -6  -1   4  852.55   52.17
  -6  -1   4  808.75   52.26
  -6   1   3   -0.66    2.90
  -6  -1   3    6.09    2.77
  -6   1   3   -0.72    2.90
  -6  -1   3    0.71    2.88
  -6  -1   3    4.98    2.18
  -6   1   3    1.60    1.95
  -6  -1   3    1.55    3.30
  -6  -1   2   12.60    2.87
  -6   1   2   12.40    2.69
  -6  -1   2   10.64    2.77
  -6   1   2   12.62    4.00
  -6  -1   2   13.90    4.18
  -6  -1   1   10.99    2.83
  -6   1   1   12.41    2.77
  -6  -1   1   11.61    2.71
  -6   1   1    8.58    3.56
  -6  -1   1    6.45    3.50
  -6  -1   1   13.36    2.83
  -6   1   0 1249.21   78.53
  -6   1   0 1306.87   78.79
  -6  -1   0 1395.66   79.33
  -6  -1   0 1421.50   75.11
  -6   1   0 1384.22   75.27
  -6  -1   0 1427.87   75.45
  -6   1  -1  108.25    7.96
  -6  -1  -1  103.23    7.96
  -6   1  -1  100.31    7.49
  -6  -1  -1  101.67    7.83
  -6   1  -2   13.89    3.29
  -6  -1  -2   13.93    3.21
  -6   1  -2   13.80    2.87
  -6  -1  -2   12.08    2.90
  -6  -1  -3   16.56    3.76
  -6   1  -3    9.24    2.73
  -6  -1  -3   17.87    3.31
  -6   1  -3   11.58    3.25
  -6   1  -4  110.09    9.33
  -6  -1  -4  101.61    9.24
  -6   1  -4  115.41   10.35
  -6  -1  -4  114.62   10.21
  -6   1  -4  111.33    8.54
  -6  -1  -4  132.31    8.82
  -6   1  -5  175.43   13.64
  -6  -1  -5  187.40   13.97
  -6   1  -5  168.26   14.33
  -6  -1  -5  201.78   15.05
  -6  -1  -5  217.02   12.85
  -6   1  -6    1.20    3.68
  -6  -1  -6    2.55    3.69
  -6   1  -6    1.95    3.32
  -6  -1  -6    5.08    3.97
  -6   1  -6   -0.26    1.89
  -6  -1  -6    3.96    2.26
  -6   1  -6    1.58    2.49
  -6   1  -7   27.25    4.69
  -6  -1  -7   32.83    5.29
  -6   1  -7   28.80    4.83
  -6  -1  -7   24.18    4.69
  -6   1  -7   22.56    3.10
  -6   1  -7   22.52    3.89
  -6  -1  -8    5.70    2.85
  -6   1  -8    8.91    2.99
  -6  -1  -8    8.59    3.03
  -6   1  -8    6.72    2.50
  -6   1  -9   76.64    5.86
  -6   1 -10   55.66    4.24
   6   2 -13  228.60   12.84
  -6  -2  13  209.69   13.15
  -6   2  13  200.40   12.77
   6   2 -12   36.38    3.91
  -6  -2  12   33.76    4.86
  -6   2  12   37.66    4.27
   6   2 -11  136.68    9.61
  -6  -2  11  133.80   11.33
  -6   2  11  137.38   10.03
  -6  -2  11  136.03    9.78
   6   2 -10  137.05    9.88
  -6   2  10  150.71   10.54
  -6  -2  10  138.98   10.14
   6   2  -9   42.04    4.94
  -6  -2   9   42.68    5.17
  -6  -2   9   42.11    6.72
  -6   2   9   40.12    5.32
   6   2  -8  388.71   24.16
  -6  -2   8  450.47   25.73
  -6   2   8  392.50   24.35
  -6  -2   7  245.47   14.79
  -6   2   7  187.40   13.66
  -6  -2   6   95.40    8.30
  -6  -2   6   99.92    7.87
  -6   2   6   97.36    7.69
  -6  -2   5   31.09    4.39
  -6  -2   5   25.99    3.70
  -6   2   5   29.25    3.78
  -6  -2   4  337.50   21.42
  -6  -2   4  365.92   21.22
  -6  -2   4  346.73   20.97
  -6   2   4  390.72   21.42
  -6  -2   3  351.89   20.70
  -6  -2   3  338.31   20.29
  -6   2   3  369.70   20.53
  -6  -2   3  352.39   20.20
  -6   2   3  335.98   23.61
  -6  -2   3  312.35   23.18
  -6  -2   3  303.43   23.76
  -6  -2   2  158.63   10.92
  -6   2   2  151.97   13.50
  -6  -2   2  140.33   13.05
  -6  -2   2  163.19   10.67
  -6   2   2  172.45   10.94
  -6  -2   2  168.42   10.84
  -6  -2   1    2.97    2.32
  -6   2   1    6.69    2.27
  -6  -2   1    2.53    2.17
  -6   2   1   -2.14    4.63
  -6  -2   1   -5.01    4.92
  -6  -2   1    8.04    2.57
  -6  -2   0   62.35    5.90
  -6   2   0   59.11    7.60
  -6   2   0   48.79    7.13
  -6  -2   0   72.49    8.29
  -6  -2   0   66.24    5.53
  -6   2   0   43.41    5.02
  -6  -2   0   65.77    5.50
  -6  -2  -1  480.95   27.49
  -6   2  -1  463.83   27.35
  -6  -2  -1  495.31   27.76
  -6   2  -1  485.91   27.10
  -6  -2  -1  441.92   27.52
  -6   2  -2    1.31    2.38
  -6  -2  -2   -1.37    2.30
  -6   2  -2    1.35    2.07
  -6  -2  -2    0.65    2.39
  -6   2  -3   25.08    3.55
  -6  -2  -3   14.91    3.15
  -6   2  -3   28.59    4.16
  -6  -2  -3   22.69    4.05
  -6   2  -4  280.88   17.70
  -6  -2  -4  271.00   17.81
  -6   2  -4  249.29   15.92
  -6   2  -4  262.17   16.69
  -6  -2  -4  302.95   17.10
  -6   2  -5   28.35    5.50
  -6  -2  -5   38.44    6.27
  -6   2  -5   28.49    4.88
  -6  -2  -5   29.90    5.23
  -6  -2  -5   33.89    4.11
  -6   2  -6   19.98    4.54
  -6  -2  -6   14.70    4.66
  -6   2  -6   15.37    4.26
  -6  -2  -6   20.57    4.78
  -6   2  -6   18.17    2.90
  -6  -2  -6   22.37    3.34
  -6   2  -6   18.78    3.51
  -6   2  -7    7.13    3.27
  -6  -2  -7    6.57    3.50
  -6   2  -7    5.71    3.16
  -6  -2  -7    9.25    3.51
  -6   2  -7    7.20    1.92
  -6  -2  -7    6.18    2.10
  -6   2  -7    4.30    2.64
  -6  -2  -8   37.23    4.82
  -6   2  -8   34.22    4.30
  -6  -2  -8   39.51    4.66
  -6   2  -8   32.98    3.24
  -6   2  -8   32.08    3.97
  -6   2  -9  132.54    8.80
   6   3 -13    6.60    1.75
   6   3 -12    5.64    2.27
   6   3 -11  222.70   14.09
  -6  -3  11  217.48   14.27
   6   3 -10  121.28    8.55
  -6  -3  10   83.11    9.47
   6   3  -9  410.32   23.78
  -6  -3   9  365.77   25.04
   6   3  -8    3.59    2.50
   6   3  -7   13.85    3.34
  -6  -3   7   20.12    4.30
  -6  -3   6  126.06    9.08
   6   3  -6   96.70    8.13
  -6  -3   6  112.97    8.58
  -6  -3   5   40.30    4.81
  -6  -3   5   34.15    4.38
  -6  -3   4  132.39    9.41
  -6  -3   4  122.54    8.88
  -6  -3   3   44.82    4.76
  -6  -3   3   43.46    4.61
  -6  -3   2    0.61    2.21
  -6  -3   2   -0.25    2.34
  -6  -3   1    7.41    2.60
  -6  -3   1    5.06    2.46
  -6  -3   0  161.32   11.12
  -6  -3   0  179.12   11.64
  -6  -3  -1   46.33    5.18
  -6  -3  -1   41.06    4.72
  -6   3  -1   41.40    4.29
  -6  -3  -1   35.88    4.64
  -6  -3  -2    3.12    2.52
  -6   3  -2    5.47    2.43
  -6  -3  -2    3.40    2.61
  -6   3  -3    9.36    2.41
  -6   3  -3   12.26    2.97
  -6  -3  -3   13.50    3.17
  -6  -3  -3   13.04    3.62
  -6   3  -4   15.16    2.76
  -6   3  -4   12.43    3.17
  -6  -3  -4   14.96    3.26
  -6  -3  -4   18.12    4.17
  -6  -3  -5  893.49   55.23
  -6  -3  -5  958.49   56.60
  -6   3  -5  958.27   53.39
  -6   3  -5 1048.02   53.89
  -6  -3  -5 1002.57   54.24
  -6  -3  -6  110.70    9.80
  -6  -3  -6  106.37   10.56
  -6   3  -6  127.64    8.19
  -6  -3  -6  116.67    8.50
  -6   3  -6  113.03    9.10
  -6  -3  -7   23.12    4.64
  -6  -3  -7   28.82    4.39
  -6   3  -7   27.57    3.06
  -6  -3  -7   26.94    3.34
  -6   3  -7   27.32    4.02
  -6  -3  -8   28.48    4.09
  -6   3  -8   24.76    2.77
  -6   3  -8   27.88    3.60
  -6   3  -9  459.28   25.90
   6   4 -13  459.67   25.53
   6   4 -12   15.41    2.63
   6   4 -11  215.33   13.77
   6   4 -10  130.63    9.54
  -6  -4  10  118.67   10.26
   6  -4 -10  132.21    9.13
   6   4  -9    5.02    2.70
  -6  -4   9    7.64    4.50
   6   4  -8   36.95    4.67
  -6  -4   8   31.55    5.55
   6   4  -7   41.16    4.97
  -6  -4   7   51.87    6.07
   6   4  -6   59.56    5.71
  -6  -4   6   64.70    6.34
  -6  -4   5  494.75   28.55
  -6  -4   5  482.09   28.19
  -6  -4   5  487.40   29.00
  -6  -4   4   46.64    5.05
  -6  -4   4   40.79    4.77
  -6  -4   4   50.96    5.62
  -6  -4   3  272.01   16.37
  -6  -4   3  250.20   15.84
  -6  -4   2   27.15    3.99
  -6  -4   2   32.54    3.88
  -6  -4   1  103.76    8.23
  -6  -4   1  100.44    7.66
  -6  -4   0  148.44   10.98
  -6  -4   0  156.47   10.42
  -6  -4  -1 1098.60   66.33
  -6   4  -1 1173.89   65.68
  -6  -4  -2   22.23    3.90
  -6   4  -2   19.10    3.35
  -6   4  -2   18.59    2.86
  -6   4  -2   17.83    3.17
  -6  -4  -2   17.04    3.58
  -6   4  -3   30.32    4.04
  -6   4  -3   25.35    3.38
  -6   4  -3   35.61    4.08
  -6  -4  -3   29.49    4.22
  -6   4  -4    4.04    2.25
  -6   4  -4    3.04    2.43
  -6  -4  -4    3.16    2.71
  -6  -4  -5  142.15   12.59
  -6   4  -5  155.57   10.12
  -6   4  -5  162.17   10.34
  -6  -4  -5  159.99   10.89
  -6  -4  -6   -0.60    3.37
  -6   4  -6    2.20    1.73
  -6  -4  -6   -0.29    2.07
  -6   4  -6    2.14    2.43
  -6   4  -7   15.90    2.42
  -6  -4  -7   17.33    2.77
  -6   4  -7   15.43    2.97
  -6   4  -8    9.97    1.87
  -6   4  -8   13.65    2.53
  -6   4  -9  230.14   13.60
   6   5 -12   76.34    5.74
  -6  -5  12   75.12    6.08
   6   5 -11   10.57    2.56
  -6  -5  11    8.17    3.81
  -6  -5  10   98.49   10.18
   6  -5 -10  119.76    8.60
   6   5  -9  633.74   32.14
   6  -5  -9  580.87   31.48
   6   5  -8   41.17    4.96
  -6  -5   8   42.17    6.47
   6   5  -7   11.59    3.05
  -6  -5   7   12.49    4.35
  -6  -5   6    6.59    3.42
  -6  -5   6    1.76    3.49
  -6  -5   5  128.30    9.18
  -6  -5   5  118.05    9.83
  -6  -5   4  133.50    9.20
  -6  -5   4  119.89    8.88
  -6  -5   4  112.51    9.47
  -6  -5   3  184.22   12.72
  -6  -5   3  202.52   12.58
  -6  -5   3  198.80   13.32
  -6  -5   2   34.17    4.52
  -6  -5   2   44.69    4.54
  -6  -5   1  396.53   24.83
  -6  -5   1  441.76   24.49
  -6  -5   0  352.95   22.89
  -6  -5   0  409.90   22.58
  -6  -5  -1   41.71    5.37
  -6  -5  -1   54.10    5.32
  -6   5  -1   44.46    4.64
  -6  -5  -2   89.39    7.97
  -6   5  -2   79.59    7.24
  -6   5  -2   86.01    6.43
  -6   5  -2   93.30    6.96
  -6  -5  -2   87.27    7.63
  -6  -5  -3   59.45    6.63
  -6   5  -3   55.67    5.70
  -6   5  -3   55.38    4.86
  -6   5  -3   56.07    5.30
  -6  -5  -3   51.94    5.82
  -6   5  -4   89.32    7.24
  -6   5  -4   80.36    6.37
  -6  -5  -4   85.05    7.30
  -6   5  -5  409.79   25.78
  -6   5  -5  449.20   25.06
  -6   5  -5  453.35   25.21
  -6  -5  -5  444.55   25.85
  -6   5  -6   27.20    3.03
  -6  -5  -6   23.74    3.49
  -6   5  -6   27.48    3.86
  -6   5  -7    5.58    1.98
  -6   5  -7    4.37    1.52
  -6  -5  -7    5.14    1.95
  -6   5  -7    6.15    2.45
  -6   5  -8   23.01    2.91
  -6   5  -8   29.02    2.70
  -6   5  -8   31.38    3.23
  -6   5  -9  215.26   12.21
   6   6 -12   49.05    4.05
  -6  -6  12   49.22    4.45
   6   6 -11   10.32    2.46
  -6  -6  11   13.48    3.65
   6   6 -10   -1.18    2.14
  -6  -6  10    2.26    4.39
   6  -6 -10    3.25    2.12
   6   6  -9   65.88    5.84
   6  -6  -9   59.58    5.47
   6   6  -8  370.05   22.11
  -6  -6   8  372.83   23.56
   6  -6  -8  357.23   21.93
   6   6  -7    9.39    2.94
  -6  -6   7   12.85    4.49
   6  -6  -7    8.37    3.51
  -6  -6   6  218.37   14.50
  -6  -6   6  235.47   15.27
   6  -6  -6  199.63   14.29
  -6  -6   5  620.56   34.45
  -6  -6   5  602.92   35.10
   6  -6  -5  582.20   34.74
  -6  -6   4  557.95   31.44
  -6  -6   4  541.23   32.17
  -6  -6   3   -0.32    2.46
  -6  -6   3   -0.54    2.49
  -6  -6   3    0.76    3.04
  -6  -6   3    5.06    4.08
  -6  -6   2  113.09    8.55
  -6  -6   2  109.28    8.06
  -6  -6   2  104.33    8.85
  -6  -6   2  120.03    9.35
  -6  -6   1  167.09   12.22
  -6  -6   1  193.37   11.84
  -6  -6   0    0.38    2.66
  -6  -6   0    0.54    2.42
  -6  -6  -1  127.92    9.10
  -6   6  -1  111.09    9.04
  -6  -6  -1  135.78   10.01
  -6  -6  -2    2.35    3.43
  -6   6  -2    1.43    2.20
  -6   6  -2    3.09    2.00
  -6  -6  -2    1.70    2.90
  -6   6  -3    8.95    2.79
  -6   6  -3    8.03    2.51
  -6  -6  -3    6.90    3.22
  -6   6  -4   82.70    7.18
  -6   6  -4   90.41    6.49
  -6  -6  -4   82.91    7.38
  -6  -6  -5   58.30    6.31
  -6   6  -5   53.79    5.38
  -6   6  -5   50.63    4.76
  -6   6  -5   60.25    4.85
  -6  -6  -5   63.82    5.70
  -6   6  -6    5.97    2.37
  -6   6  -6    9.62    1.91
  -6  -6  -6    5.71    2.24
  -6   6  -7    1.61    1.49
  -6   6  -7    3.15    1.37
  -6  -6  -7    1.22    1.59
  -6   6  -8   50.98    4.19
  -6   6  -8   51.58    3.76
   6   7 -11    0.40    1.65
  -6  -7  11    3.25    2.93
   6   7 -10  145.22    9.76
  -6  -7  10  161.81   11.40
   6  -7 -10  136.63    9.28
   6   7  -9  330.97   19.20
   6  -7  -9  337.74   18.89
   6   7  -8    5.09    2.62
  -6  -7   8    1.95    4.44
   6  -7  -8    7.88    3.04
   6   7  -7    0.97    2.39
  -6  -7   7   -0.87    4.32
   6  -7  -7    4.07    3.13
  -6  -7   6   61.43    6.35
  -6  -7   6   55.56    6.29
   6  -7  -6   49.09    5.74
  -6  -7   5    1.29    2.89
  -6  -7   5    0.41    3.30
   6  -7  -5    5.03    3.32
  -6  -7   4  178.31   12.07
  -6  -7   4  186.48   12.94
  -6  -7   4  194.50   13.87
  -6  -7   3   45.49    4.60
  -6  -7   3   37.65    5.24
  -6  -7   3   39.98    6.15
  -6  -7   2    6.66    2.78
  -6  -7   2    8.78    2.83
  -6  -7   2    2.79    3.23
  -6  -7   2    7.35    4.12
  -6  -7   1  210.74   13.85
  -6  -7   1  205.49   14.39
  -6  -7   0  515.45   29.50
  -6   7   0  481.01   28.97
  -6  -7  -1   90.03    8.48
  -6   7  -1   96.28    7.68
  -6  -7  -2    3.03    3.78
  -6   7  -2    5.37    2.57
  -6   7  -2    0.22    2.03
  -6   7  -3  158.68   11.17
  -6   7  -3  159.36   10.19
  -6  -7  -3  159.78   11.77
  -6   7  -4   96.44    7.85
  -6   7  -4  104.07    7.23
  -6  -7  -4  103.79    8.27
  -6  -7  -5    6.20    3.36
  -6   7  -5    9.38    2.46
  -6   7  -5    8.54    2.16
  -6   7  -5    8.11    1.94
  -6  -7  -5    3.87    2.33
  -6   7  -6   12.38    2.40
  -6   7  -6    8.38    1.77
  -6  -7  -6    6.58    2.26
  -6   7  -7   64.19    5.05
  -6   7  -7   69.17    4.58
  -6  -7  -7   58.01    4.79
  -6  -8  11   11.28    2.71
   6   8 -10  122.80    8.34
   6  -8 -10  113.60    7.98
   6   8  -9   73.25    6.23
  -6  -8   9   71.36    7.56
   6  -8  -9   84.84    6.13
   6   8  -8  219.97   14.01
  -6  -8   8  220.41   15.38
   6  -8  -8  222.13   13.88
   6   8  -7   72.62    6.15
  -6  -8   7   72.43    7.30
   6  -8  -7   67.09    6.24
  -6  -8   6    5.25    3.39
  -6  -8   6    6.43    3.48
   6  -8  -6   10.60    3.29
  -6  -8   5  497.03   27.89
  -6  -8   5  459.05   28.38
  -6  -8   4  177.13   10.97
  -6  -8   4  155.23   11.60
  -6  -8   4  137.47   12.55
  -6  -8   3  104.29    8.76
  -6  -8   3   98.57    9.38
  -6  -8   2    3.30    3.47
  -6  -8   2    0.79    3.79
  -6  -8   1  127.59    8.98
  -6   8   1  109.76    8.48
  -6  -8   1   96.05    9.16
  -6  -8   0   59.90    5.95
  -6   8   0   44.22    4.99
  -6  -8  -1    0.46    3.46
  -6   8  -1    2.08    2.30
  -6   8  -2    0.74    1.95
  -6  -8  -2   -3.10    4.07
  -6   8  -2   -1.71    2.09
  -6   8  -2   -1.69    2.15
  -6  -8  -3   -1.65    4.44
  -6   8  -3    0.66    2.01
  -6   8  -3   -1.02    2.02
  -6  -8  -3    1.28    3.09
  -6  -8  -4  349.32   21.94
  -6   8  -4  324.06   20.21
  -6   8  -4  338.17   19.40
  -6  -8  -4  347.24   20.70
  -6  -8  -5   10.27    3.63
  -6   8  -5    5.92    2.28
  -6   8  -5    7.67    2.10
  -6   8  -5    5.66    1.61
  -6  -8  -5   11.07    2.84
  -6  -8  -6  108.88    7.65
  -6   8  -6  103.33    7.08
  -6   8  -6   97.79    6.38
  -6  -8  -6   90.38    6.77
  -6   8  -7    0.67    1.12
  -6   8  -7    1.29    1.25
  -6   8  -7    2.32    1.10
  -6  -8  -7    0.57    1.30
  -6  -9  10   48.09    4.84
   6  -9 -10   58.03    4.14
   6   9  -9    4.10    1.81
  -6  -9   9    2.04    3.23
   6  -9  -9    3.23    1.92
   6   9  -8    8.21    2.32
  -6  -9   8    7.09    3.87
   6  -9  -8   11.13    2.61
   6   9  -7    3.92    2.16
  -6  -9   7   10.74    3.73
   6  -9  -7    8.72    2.85
   6   9  -6  108.93    8.16
  -6  -9   6   93.80    8.72
  -6  -9   5    1.12    3.10
  -6  -9   5   -3.19    5.81
  -6  -9   4  277.30   18.08
  -6  -9   4  296.24   19.52
  -6  -9   3    9.78    3.59
  -6  -9   3   17.54    5.63
  -6  -9   2   16.17    4.39
  -6  -9   2   22.16    5.12
  -6  -9   1   24.33    4.79
  -6  -9   0  284.52   18.23
  -6   9   0  294.84   17.96
  -6  -9   0  291.64   19.35
  -6   9  -1   76.03    5.77
  -6  -9  -1   68.86    7.17
  -6   9  -1   62.19    5.97
  -6   9  -2  120.54    8.60
  -6  -9  -2  148.90   11.06
  -6   9  -2  143.50    9.53
  -6   9  -2  123.99    8.45
  -6  -9  -3   43.09    6.13
  -6   9  -3   38.61    4.33
  -6   9  -3   41.84    3.89
  -6  -9  -3   44.83    5.47
  -6  -9  -4   25.69    4.85
  -6   9  -4   24.42    3.31
  -6   9  -4   25.51    2.92
  -6  -9  -4   29.11    4.04
  -6  -9  -5   72.69    6.59
  -6   9  -5   68.91    5.38
  -6   9  -5   67.07    4.82
  -6  -9  -5   61.19    5.41
  -6  -9  -6  159.86   10.22
  -6   9  -6  163.16    9.88
  -6   9  -6  160.12    9.35
  -6  -9  -6  155.39    9.72
   6 -10  -9    0.67    1.44
   6 -10  -8   12.58    2.39
   6  10  -7    4.28    1.89
   6 -10  -7    3.52    1.99
   6  10  -6   27.42    3.64
   6 -10  -6   45.98    4.22
  -6 -10   5   15.93    3.56
  -6 -10   5   13.85    6.02
  -6 -10   4   17.34    3.85
  -6 -10   4   23.28    6.19
  -6 -10   3   26.43    4.51
  -6 -10   3   32.66    5.99
  -6 -10   2    7.92    3.62
  -6 -10   1    2.62    3.67
  -6  10   0  151.93   10.30
  -6 -10   0  184.38   12.94
  -6  10  -1   77.18    6.00
  -6 -10  -1   83.39    7.43
  -6 -10  -1   88.20    8.82
  -6  10  -2   18.98    2.76
  -6 -10  -2   24.06    4.42
  -6  10  -2   23.97    3.23
  -6  10  -2   23.06    2.78
  -6  10  -3    1.63    1.51
  -6 -10  -3    0.85    3.49
  -6  10  -3    2.14    1.65
  -6  10  -3    4.86    1.77
  -6 -10  -4  209.49   14.67
  -6  10  -4  193.37   13.30
  -6  10  -4  245.43   13.03
  -6 -10  -4  244.62   14.17
  -6 -10  -5    4.53    2.43
  -6  10  -5    6.24    1.52
  -6 -10  -5    3.93    1.79
   6 -11  -7    1.51    1.65
   6  11  -6   53.30    4.41
   6  11  -5    6.27    1.95
  -6 -11   5    3.90    2.70
  -6 -11   5    6.08    5.24
  -6 -11   4   38.46    4.64
  -6 -11   4   30.00    6.37
  -6 -11   3   39.08    4.84
  -6  11   2   37.15    3.66
  -6 -11   2   36.13    5.03
  -6  11   1   56.25    4.68
  -6 -11   1   62.08    6.64
  -6  11   0   43.60    3.88
  -6 -11   0   42.81    6.07
  -6  11  -1    1.46    1.52
  -6 -11  -1    6.46    4.24
  -6  11  -1    3.19    1.65
  -6  11  -2   94.71    6.64
  -6  11  -2  106.13    6.52
  -6  11  -3   31.60    2.93
  -6 -11  -3   26.77    4.12
  -6  11  -3   37.70    2.95
   6  12  -4   -0.29    1.22
  -6 -12   4   -1.44    2.33
  -6  12   3    1.02    1.28
  -6 -12   3    1.88    2.52
  -6  12   2    9.99    1.86
  -6 -12   2   15.25    3.41
  -6  12   1  121.07    7.46
  -6 -12   1  105.22    8.92
  -6  12   0   21.50    2.50
  -6 -12   0   22.26    4.39
  -6  12   0   28.50    2.49
  -6  12  -1   83.11    5.97
  -6  12  -1  102.73    5.95
  -7   0  12   -0.75    2.22
  -7   0  11    3.91    3.15
  -7   0  10   -2.18    3.69
  -7   0   9  190.46   13.90
  -7   0   8   -0.44    3.23
  -7   0   7  369.67   22.82
  -7   0   6    2.17    2.79
  -7   0   5  143.38   10.32
  -7   0   4   -0.67    2.38
  -7   0   4    4.37    2.20
  -7   0   3   15.34    3.52
  -7   0   3   13.29    3.02
  -7   0   2    0.37    3.31
  -7   0   2    2.58    2.50
  -7   0   1  300.72   18.49
  -7   0   0   -1.02    2.56
  -7   0  -1  235.48   15.36
  -7   0  -2    0.79    2.85
  -7   0  -3    0.57    3.22
  -7   0  -3    0.59    2.55
  -7   0  -3    3.46    3.33
  -7   0  -4    2.45    3.55
  -7   0  -4    1.40    3.56
  -7   0  -5    2.36    3.71
  -7   0  -5   -0.93    3.64
  -7   0  -5    4.40    2.35
  -7   0  -6   -0.48    2.81
  -7   0  -6   -0.82    3.28
  -7   0  -6    0.59    1.98
  -7   0  -7  591.91   31.93
  -7   0  -7  523.29   31.89
  -7   0  -7  551.34   31.12
  -7   0  -8   -1.84    1.75
  -7  -1  12   53.01    5.12
  -7   1  12   56.22    4.85
  -7  -1  11  313.90   20.39
  -7   1  11  339.18   19.93
  -7  -1  10   -0.48    3.77
  -7   1  10    4.21    3.16
  -7  -1   9   18.33    4.74
  -7   1   9   20.24    4.40
  -7  -1   8    6.15    3.80
  -7   1   8    9.71    3.45
  -7  -1   7   17.99    4.06
  -7   1   7   14.42    3.63
  -7  -1   6   52.14    5.91
  -7   1   6   74.05    6.48
  -7  -1   5    4.31    2.61
  -7   1   5    0.33    2.40
  -7  -1   4   83.52    7.58
  -7   1   4   78.76    6.89
  -7  -1   4   80.38    6.93
  -7  -1   3  185.33   12.75
  -7   1   3  182.79   12.14
  -7  -1   3  178.99   12.15
  -7  -1   2  323.35   20.57
  -7   1   2  332.28   20.31
  -7  -1   2  353.23   20.44
  -7  -1   1  297.16   17.11
  -7  -1   1  233.27   16.07
  -7   1   1  260.07   16.52
  -7  -1   1  280.02   16.69
  -7   1   0   27.74    3.94
  -7  -1   0   24.99    4.07
  -7   1   0   20.09    3.25
  -7   1  -1    7.91    2.96
  -7  -1  -1    4.34    2.86
  -7   1  -1    5.52    2.31
  -7   1  -2   26.13    4.23
  -7  -1  -2   18.94    3.95
  -7   1  -2   20.90    3.42
  -7   1  -3  872.61   45.76
  -7  -1  -3  881.31   45.89
  -7   1  -3  701.32   46.14
  -7   1  -3  754.09   44.36
  -7   1  -4    5.43    3.80
  -7  -1  -4    2.45    3.64
  -7   1  -4    2.74    3.42
  -7  -1  -4    4.21    3.55
  -7   1  -5   34.56    5.51
  -7  -1  -5   39.12    5.88
  -7   1  -5   25.79    5.01
  -7  -1  -5   29.39    5.08
  -7   1  -5   27.75    4.07
  -7   1  -6   20.83    4.18
  -7  -1  -6   26.80    4.78
  -7   1  -6   21.74    4.21
  -7  -1  -6   20.43    4.29
  -7   1  -6   20.44    3.57
  -7   1  -7  224.15   14.07
  -7  -1  -7  227.83   14.20
  -7  -1  -7  209.99   14.38
  -7   1  -7  220.82   13.64
  -7   1  -8   18.07    2.57
  -7  -1  -8   18.92    2.64
  -7   1  -8   17.66    2.35
   7   2 -12    4.82    1.66
  -7  -2  12    4.47    2.42
  -7   2  12    3.64    1.84
   7   2 -11   30.63    3.48
  -7  -2  11   29.42    4.73
  -7   2  11   26.40    3.60
  -7  -2  10  231.02   18.06
  -7   2  10  302.90   17.26
  -7  -2   9   16.47    4.73
  -7   2   9   21.58    3.94
  -7  -2   8  328.48   21.30
  -7   2   8  331.31   20.40
  -7  -2   7  205.26   14.07
  -7   2   7  195.24   13.36
  -7  -2   6  312.12   19.44
  -7   2   6  312.26   19.20
  -7  -2   5  109.22    9.19
  -7  -2   5  114.00    8.60
  -7   2   5  114.51    8.59
  -7  -2   4  128.44    9.77
  -7   2   4  128.39    9.25
  -7  -2   4  116.86    9.14
  -7  -2   3   43.31    5.23
  -7  -2   3   34.19    4.49
  -7   2   3   53.64    4.95
  -7  -2   3   47.20    4.84
  -7  -2   2   48.72    5.58
  -7  -2   2   44.97    4.99
  -7   2   2   56.20    5.24
  -7  -2   2   45.82    4.93
  -7  -2   1  329.19   20.80
  -7  -2   1  388.85   20.65
  -7   2   1  328.91   20.53
  -7  -2   1  320.18   20.46
  -7  -2   0    7.06    3.01
  -7   2   0    2.00    2.39
  -7  -2   0    5.32    2.70
  -7   2   0    7.64    2.49
  -7   2  -1    3.19    2.98
  -7  -2  -1    5.36    2.72
  -7   2  -1    2.26    2.47
  -7  -2  -1    3.90    2.60
  -7   2  -2  395.41   23.27
  -7  -2  -2  382.39   23.29
  -7   2  -2  378.43   22.47
  -7  -2  -2  369.27   22.77
  -7   2  -3   -1.22    2.44
  -7  -2  -3   -0.33    2.48
  -7   2  -3    0.42    2.90
  -7  -2  -3    4.73    3.24
  -7  -2  -4    1.21    3.46
  -7   2  -4   -0.44    3.57
  -7  -2  -4    0.92    3.42
  -7  -2  -5   -1.20    3.43
  -7   2  -5    1.29    3.23
  -7  -2  -5    1.80    3.37
  -7   2  -5    2.81    2.37
  -7   2  -6   77.54    7.03
  -7  -2  -6   79.29    7.17
  -7  -2  -6   77.35    7.75
  -7   2  -6   75.49    6.54
  -7   2  -7  169.92   11.03
  -7  -2  -7  172.07   11.15
  -7  -2  -7  160.38   11.47
  -7   2  -7  163.89   10.77
  -7   2  -8    0.69    1.53
   7   3 -12  340.62   19.32
   7   3 -11   80.24    6.17
   7   3 -10   23.72    3.48
   7   3  -9    3.45    2.45
  -7  -3   9   -3.11    4.05
  -7  -3   8   81.15    8.17
  -7  -3   7   -0.42    2.91
  -7  -3   6  796.59   42.07
  -7  -3   6  691.42   41.34
  -7  -3   5   30.84    4.94
  -7  -3   5   50.24    5.03
  -7  -3   5   46.31    5.04
  -7  -3   5   41.55    5.03
  -7  -3   4   81.09    7.01
  -7  -3   4   65.99    6.15
  -7  -3   4   71.31    6.34
  -7  -3   3   94.78    8.05
  -7  -3   3   94.42    7.45
  -7  -3   3  104.07    7.65
  -7  -3   2  700.53   38.79
  -7  -3   2  725.46   38.22
  -7  -3   2  620.11   38.05
  -7  -3   1    6.87    3.12
  -7  -3   1    5.56    2.36
  -7  -3   1    3.43    2.68
  -7  -3   0  140.25    9.85
  -7  -3   0  136.92    9.86
  -7   3   0  112.69    9.13
  -7  -3  -1   59.15    6.10
  -7  -3  -1   66.50    6.15
  -7   3  -1   50.48    5.32
  -7   3  -2   13.86    3.12
  -7  -3  -2   14.47    3.22
  -7  -3  -2   16.09    3.62
  -7  -3  -3  112.86    9.61
  -7   3  -3  124.78    8.99
  -7  -3  -3  129.83    9.28
  -7  -3  -4    8.84    3.94
  -7  -3  -4   13.63    3.75
  -7  -3  -4    8.29    2.66
  -7  -3  -5   19.63    4.69
  -7  -3  -5   13.68    3.91
  -7  -3  -5   15.70    2.80
  -7   3  -5   10.53    2.68
  -7  -3  -6   11.80    3.78
  -7   3  -6   18.61    3.17
  -7  -3  -7   11.36    2.90
  -7   3  -7   26.06    3.14
   7   4 -12    7.79    1.72
   7   4 -11   11.77    2.31
   7  -4 -11    9.72    2.19
   7   4 -10  399.70   22.11
   7  -4 -10  356.12   21.55
   7   4  -9   99.04    7.20
  -7  -4   9   67.30    7.50
   7   4  -8  215.97   14.27
  -7  -4   8  227.46   15.05
   7   4  -7  113.05    8.66
  -7  -4   7  114.87    9.37
  -7  -4   6  146.50   11.63
  -7  -4   6  171.57   11.51
  -7  -4   5   34.90    4.49
  -7  -4   5   22.29    3.98
  -7  -4   4  258.97   16.74
  -7  -4   4  264.48   16.26
  -7  -4   3   60.82    6.02
  -7  -4   3   52.46    5.34
  -7  -4   2  290.59   18.70
  -7  -4   2  309.72   18.24
  -7  -4   1   15.55    3.57
  -7  -4   1   11.62    3.22
  -7  -4   0   -1.54    2.89
  -7  -4   0    2.38    2.78
  -7   4   0    2.77    2.31
  -7  -4  -1    2.37    3.13
  -7   4  -1    2.38    2.07
  -7   4  -1    2.26    2.37
  -7  -4  -2  440.87   27.22
  -7   4  -2  487.27   26.65
  -7  -4  -2  442.24   27.01
  -7   4  -3   18.10    3.26
  -7  -4  -3   24.63    3.84
  -7  -4  -4   22.94    4.99
  -7  -4  -4   23.63    3.59
  -7  -4  -5   38.11    5.68
  -7  -4  -5   39.39    4.23
  -7   4  -5   39.92    4.60
  -7  -4  -6   35.56    4.90
  -7   4  -6   42.01    4.27
  -7   4  -7    1.23    1.56
   7   5 -11    7.74    1.95
   7  -5 -11    5.03    1.72
   7   5 -10    1.73    1.94
  -7  -5  10   -1.59    3.29
   7  -5 -10    0.21    2.05
   7   5  -9    3.75    2.23
  -7  -5   9   -0.80    3.97
   7  -5  -9    2.09    2.58
   7   5  -8  165.72   11.54
  -7  -5   8  144.98   12.23
   7   5  -7    8.23    2.80
  -7  -5   7    6.44    3.99
   7  -5  -7    9.88    3.40
   7   5  -6  418.76   27.01
  -7  -5   6  535.71   27.94
  -7  -5   5   35.02    4.87
  -7  -5   5   45.67    5.10
  -7  -5   4   -2.82    2.63
  -7  -5   4    2.08    2.71
  -7  -5   3   41.59    4.91
  -7  -5   3   35.48    4.45
  -7  -5   2  486.28   28.39
  -7  -5   2  479.88   27.72
  -7  -5   1  123.10   10.18
  -7  -5   1  127.15    9.37
  -7   5   1  140.91    9.26
  -7  -5   0    0.40    2.92
  -7  -5   0    2.60    2.56
  -7   5   0    2.16    2.23
  -7  -5  -1   89.48    8.23
  -7   5  -1   89.96    7.47
  -7   5  -1   97.56    7.20
  -7  -5  -2    9.31    3.57
  -7   5  -2    7.37    2.40
  -7   5  -2   11.05    2.79
  -7  -5  -2   10.77    3.25
  -7  -5  -3  131.74   10.27
  -7   5  -3  131.17    9.60
  -7  -5  -3  118.68   10.50
  -7   5  -3  139.86    8.79
  -7   5  -3  132.27    9.34
  -7  -5  -3  148.57   10.10
  -7   5  -4    4.55    1.94
  -7  -5  -4    3.63    2.34
  -7  -5  -5   44.13    4.45
  -7   5  -5   49.08    4.77
  -7  -5  -6  209.76   12.68
  -7   5  -6  213.41   13.05
  -7   5  -7   23.84    2.64
   7   6 -11    9.55    1.91
   7   6 -10   38.45    3.86
  -7  -6  10   44.00    5.21
   7  -6 -10   40.36    3.80
   7   6  -9   73.59    5.94
   7  -6  -9   75.19    5.73
   7   6  -8    1.73    2.12
  -7  -6   8    0.86    4.62
   7  -6  -8    3.85    2.55
   7   6  -7   14.43    3.05
  -7  -6   7   25.46    4.93
   7  -6  -7   22.03    3.90
   7   6  -6   11.11    2.83
  -7  -6   6   15.09    4.11
   7  -6  -6    9.22    3.29
  -7  -6   5  112.84    8.71
  -7  -6   4   22.45    3.77
  -7  -6   4   22.72    3.77
  -7  -6   4   18.56    4.60
  -7  -6   3    8.88    3.16
  -7  -6   3    3.55    2.61
  -7  -6   2  169.57   11.79
  -7  -6   2  166.16   11.05
  -7  -6   1   77.20    7.08
  -7  -6   1   67.53    6.20
  -7   6   1   80.32    6.21
  -7  -6   0    2.06    3.08
  -7   6   0    3.74    2.16
  -7   6   0    2.30    2.12
  -7  -6  -1    6.19    3.72
  -7   6  -1    8.39    2.65
  -7   6  -1   12.08    2.70
  -7  -6  -2  269.82   17.78
  -7   6  -2  284.83   16.87
  -7   6  -2  276.29   15.82
  -7   6  -2  245.34   16.03
  -7  -6  -3   -0.84    3.37
  -7   6  -3    3.04    2.06
  -7   6  -3    1.68    1.80
  -7  -6  -3    1.74    2.71
  -7   6  -4   93.89    7.20
  -7   6  -4   93.87    6.48
  -7  -6  -4   99.10    7.47
  -7   6  -5    6.11    1.86
  -7  -6  -5    5.90    2.16
  -7  -6  -6    3.31    1.66
   7   7 -10    0.18    1.46
  -7  -7  10   -0.50    2.83
   7  -7 -10    1.74    1.58
   7   7  -9    7.30    2.16
  -7  -7   9    3.89    3.82
   7  -7  -9    3.08    2.18
   7   7  -8  100.88    8.08
  -7  -7   8  108.52    9.60
   7   7  -7   -1.38    2.08
  -7  -7   7    0.38    3.65
   7  -7  -7    0.80    2.45
   7   7  -6   14.02    3.12
  -7  -7   6   22.65    4.27
   7  -7  -6   16.65    3.58
  -7  -7   5   13.13    3.44
  -7  -7   4   50.46    4.98
  -7  -7   4   39.96    5.68
  -7  -7   3  107.21    8.02
  -7  -7   3   99.65    7.52
  -7  -7   3   86.90    8.56
  -7  -7   2   24.31    3.84
  -7  -7   2   12.50    3.04
  -7  -7   1   85.47    7.46
  -7  -7   1   74.81    6.46
  -7   7   1   92.90    7.18
  -7  -7   0   73.51    7.14
  -7   7   0   72.51    6.44
  -7  -7  -1    0.91    3.64
  -7   7  -1    3.19    2.15
  -7   7  -1    2.17    1.98
  -7  -7  -2   84.06    8.52
  -7   7  -2   99.04    7.54
  -7   7  -2  100.04    6.74
  -7  -7  -3  278.85   19.13
  -7   7  -3  291.83   18.06
  -7   7  -3  315.40   17.37
  -7  -7  -3  305.89   18.71
  -7  -7  -4   79.15    7.25
  -7   7  -4   87.80    6.45
  -7   7  -4   79.65    5.72
  -7  -7  -4   89.82    6.75
  -7   7  -5    7.68    1.91
  -7  -7  -5    5.18    1.88
   7   8  -9    2.37    1.63
  -7  -8   9    2.16    2.93
   7  -8  -9    1.69    1.63
   7   8  -8   40.83    4.10
  -7  -8   8   39.17    5.50
   7  -8  -8   52.70    4.31
  -7  -8   7  352.83   21.10
   7  -8  -7  388.26   20.24
   7   8  -6    1.76    1.93
  -7  -8   6    0.93    3.12
  -7  -8   5   19.85    3.74
  -7  -8   4   13.52    3.17
  -7  -8   4   11.10    3.98
  -7  -8   3   52.58    4.87
  -7  -8   3   39.32    5.89
  -7  -8   2   39.98    4.57
  -7   8   2   29.70    3.88
  -7  -8   1  160.72   11.19
  -7   8   1  154.51   10.67
  -7  -8   0   -1.58    3.20
  -7   8   0    1.49    1.87
  -7   8   0   -0.19    1.89
  -7  -8  -1   78.83    7.65
  -7   8  -1   64.37    5.92
  -7   8  -1   75.93    5.44
  -7  -8  -2   18.72    4.60
  -7   8  -2   19.96    3.12
  -7   8  -2   23.64    2.75
  -7  -8  -3    2.88    3.78
  -7   8  -3    4.12    1.92
  -7   8  -3    5.06    1.71
  -7  -8  -4   53.78    5.42
  -7   8  -4   45.66    4.09
  -7   8  -4   45.65    3.67
  -7  -8  -4   50.61    4.67
   7   9  -8    4.26    1.60
   7  -9  -8    6.87    1.84
   7   9  -7    3.36    1.79
  -7  -9   7    0.26    2.93
   7  -9  -7    8.45    2.12
   7   9  -6   26.41    3.13
   7   9  -5   38.32    4.02
  -7  -9   4   43.66    5.55
  -7  -9   3  366.11   22.81
  -7  -9   2   28.57    5.41
  -7  -9   1   -0.31    2.67
  -7   9   1    0.26    1.70
  -7   9   1    3.26    1.94
  -7   9   0   64.49    5.15
  -7  -9   0   72.16    6.69
  -7   9   0   64.98    5.61
  -7   9   0   76.38    5.24
  -7  -9  -1  200.83   13.48
  -7   9  -1  171.05   11.94
  -7   9  -1  205.61   11.53
  -7  -9  -2   20.48    4.43
  -7   9  -2   21.38    2.79
  -7   9  -2   20.87    2.47
  -7  -9  -3  163.50   11.67
  -7   9  -3  169.57   10.39
  -7   9  -3  165.83    9.83
   7  10  -6    7.73    1.88
   7  10  -5   -0.36    1.51
  -7 -10   3   81.74    7.74
  -7  10   2   22.57    2.61
  -7 -10   2   13.49    4.75
  -7  10   1   70.74    5.43
  -7  10   1   84.56    5.46
  -7  10   0   -0.62    1.37
  -7  10   0   -1.19    1.48
  -7  10  -1   19.45    2.27
  -7 -10  -1   28.33    4.13
  -7  10  -1   22.22    2.62
  -7  10  -1   24.75    2.47
  -7  10  -2   39.51    3.13
  -8   0  11   -0.22    1.83
  -8   0  10  390.13   23.19
  -8   0   9    0.71    2.81
  -8   0   8   35.41    5.05
  -8   0   8   30.59    4.76
  -8   0   7   -1.53    2.90
  -8   0   6  237.42   15.46
  -8   0   5    0.68    2.64
  -8   0   4  398.51   23.65
  -8   0   3    1.27    2.55
  -8   0   2    6.02    2.60
  -8   0   1    3.24    2.50
  -8   0   0  649.31   36.93
  -8   0  -1    0.36    2.70
  -8   0  -2   -1.02    3.26
  -8   0  -2   -3.74    3.11
  -8   0  -3    3.10    3.25
  -8   0  -3   -1.16    3.12
  -8   0  -4   35.36    5.22
  -8   0  -4   36.04    4.85
  -8   0  -5    0.69    2.25
  -8   0  -5    4.20    2.66
  -8   0  -6    0.21    1.64
  -8   1  11   21.10    2.83
  -8  -1  11   27.35    3.36
  -8   1  10   31.24    3.88
  -8  -1  10   31.89    4.41
  -8  -1  10   17.53    3.75
  -8   1  10   20.74    3.48
  -8   1   9    1.64    2.50
  -8  -1   9    1.65    3.25
  -8  -1   9   -3.52    3.44
  -8   1   9    0.31    2.49
  -8   1   8  530.17   30.17
  -8  -1   8  501.72   30.62
  -8   1   7   29.97    4.36
  -8  -1   7   31.91    4.88
  -8   1   6  206.48   13.48
  -8  -1   6  197.64   13.62
  -8   1   5    7.24    2.84
  -8  -1   5    6.89    2.93
  -8   1   4  353.91   21.08
  -8  -1   4  347.03   21.06
  -8  -1   3   80.63    7.56
  -8   1   3   68.92    6.30
  -8  -1   3   69.89    6.33
  -8  -1   2  101.82    8.67
  -8   1   2  101.11    7.80
  -8  -1   2  100.15    7.72
  -8   1   2   87.29    7.06
  -8   1   1    3.88    2.62
  -8  -1   1    4.15    2.39
  -8   1   1    0.49    2.00
  -8   1   0   16.86    3.53
  -8  -1   0   11.62    3.24
  -8   1   0   14.12    2.79
  -8   1  -1  118.97    8.75
  -8  -1  -1  109.86    8.59
  -8   1  -1  100.66    7.71
  -8  -1  -2    5.01    3.29
  -8   1  -2    1.12    2.73
  -8  -1  -2    4.42    3.21
  -8  -1  -3    1.54    3.21
  -8   1  -3    3.82    3.33
  -8  -1  -3    7.19    3.26
  -8   1  -4  145.49   10.28
  -8  -1  -4  133.25   10.11
  -8  -1  -4  164.35   11.39
  -8   1  -4  127.37    9.26
  -8  -1  -5    8.69    2.98
  -8   1  -5    2.62    2.61
  -8  -1  -5    5.81    2.56
  -8   1  -5    7.39    2.01
  -8   2  10  144.89    9.32
  -8  -2  10  139.18   10.36
   8  -2 -10  134.67    8.91
  -8  -2   9   35.94    5.60
  -8   2   9   49.36    4.80
  -8   2   8    2.45    2.35
  -8  -2   8    6.19    3.71
  -8   2   7   61.81    5.92
  -8  -2   7   65.27    6.81
  -8   2   6  169.72   11.48
  -8  -2   6  166.34   11.96
  -8   2   5   -2.49    2.22
  -8  -2   5    0.68    2.44
  -8  -2   4  244.47   16.81
  -8   2   4  256.34   16.07
  -8  -2   4  270.01   16.27
  -8  -2   3   17.13    4.21
  -8   2   3   22.29    3.51
  -8  -2   3   19.08    3.49
  -8  -2   2   -2.32    3.39
  -8   2   2   -1.85    2.45
  -8  -2   2    0.61    2.26
  -8   2   2    0.75    2.20
  -8   2   1   23.48    3.62
  -8  -2   1   20.65    4.47
  -8  -2   1   25.43    3.66
  -8   2   1   17.80    3.05
  -8   2   0  194.54   12.64
  -8  -2   0  195.49   12.69
  -8   2   0  177.38   11.90
  -8   2  -1   78.82    6.63
  -8  -2  -1   74.63    6.45
  -8  -2  -2    3.38    3.14
  -8   2  -2    0.25    2.06
  -8   2  -2    1.10    2.75
  -8  -2  -2    3.92    2.73
  -8  -2  -3    1.00    3.24
  -8   2  -3   -1.47    2.93
  -8  -2  -3   -1.08    2.69
  -8  -2  -4    0.92    2.76
  -8   2  -4    2.01    2.71
  -8  -2  -4    6.29    2.67
  -8   2  -4    5.74    2.16
  -8   2  -5  380.26   21.55
  -8  -2  -5  360.04   21.45
  -8  -2  -5  364.22   22.18
  -8   2  -5  364.88   21.10
   8  -3 -10  102.87    6.97
   8  -3  -9    4.24    2.40
  -8  -3   8   37.75    5.38
  -8  -3   7   72.79    7.26
  -8  -3   6    1.10    2.82
  -8  -3   5  107.58    8.43
  -8  -3   5  119.84    8.76
  -8  -3   4   15.61    4.09
  -8  -3   4   19.22    3.27
  -8  -3   4   18.02    3.49
  -8  -3   3  300.08   18.65
  -8  -3   3  282.31   17.72
  -8  -3   3  301.50   17.96
  -8  -3   2    3.03    3.14
  -8  -3   2    9.41    2.52
  -8  -3   2    4.76    2.72
  -8   3   2    5.79    2.29
  -8  -3   1   -0.60    2.15
  -8  -3   1    3.38    3.59
  -8   3   1    2.26    2.15
  -8  -3   0   70.30    6.95
  -8  -3   0   66.11    5.90
  -8   3   0   56.68    5.35
  -8  -3  -1  476.55   24.18
  -8   3  -1  355.02   22.93
  -8  -3  -2    1.37    3.06
  -8   3  -2    2.49    2.16
  -8  -3  -2    3.05    2.53
  -8  -3  -3   39.82    5.36
  -8  -3  -3   33.52    4.45
  -8  -3  -4   49.22    5.93
  -8   3  -4   60.31    5.13
  -8  -3  -5   30.31    4.03
  -8   3  -5   34.99    3.44
   8  -4 -10    2.26    1.65
   8  -4  -9  243.58   14.53
   8  -4  -8   13.02    2.85
  -8  -4   7    9.49    3.50
   8  -4  -7   13.96    3.09
  -8  -4   6    0.30    3.07
  -8  -4   5   10.16    3.30
  -8  -4   4   -1.48    3.16
  -8  -4   4    3.90    2.78
  -8  -4   3   79.28    7.13
  -8  -4   3   62.60    5.96
  -8  -4   2   12.67    3.92
  -8  -4   2    7.90    3.04
  -8   4   2   11.06    2.73
  -8   4   1   59.52    5.77
  -8   4   1   69.57    5.79
  -8  -4   0    3.77    3.46
  -8   4   0    2.20    2.24
  -8  -4  -1   28.00    4.89
  -8   4  -1   17.31    3.02
  -8  -4  -2   19.56    3.86
  -8  -4  -3    2.12    2.92
  -8  -4  -4   30.70    4.36
  -8   4  -4   32.50    3.60
  -8   4  -5  334.15   19.14
   8  -5  -9   50.23    4.22
  -8  -5   8   56.66    6.75
   8  -5  -8  113.87    6.80
  -8  -5   7    3.53    3.37
   8  -5  -7    4.93    2.55
  -8  -5   6   54.42    5.81
  -8  -5   5  225.62   14.41
  -8  -5   4  162.06   11.16
  -8  -5   4  149.03   10.46
  -8  -5   3   21.90    4.26
  -8  -5   3   20.88    3.65
  -8   5   3   22.39    3.37
  -8  -5   2   78.84    7.26
  -8  -5   2   64.97    6.11
  -8   5   2   71.11    5.71
  -8   5   1   34.06    4.19
  -8   5   1   41.91    4.18
  -8  -5   0   28.27    5.11
  -8   5   0   21.50    3.27
  -8   5   0   30.23    3.48
  -8  -5  -1  276.64   17.85
  -8   5  -1  285.91   16.78
  -8   5  -1  268.66   16.37
  -8  -5  -2   15.42    3.61
  -8  -5  -3    3.32    2.54
  -8   5  -4    5.25    1.88
   8   6  -8   18.38    2.64
  -8  -6   8   17.60    3.85
   8  -6  -8   19.64    2.75
  -8  -6   7    1.59    3.31
  -8  -6   6   31.61    4.67
  -8  -6   5    0.57    2.87
  -8  -6   4   67.05    6.19
  -8  -6   4   61.66    5.78
  -8   6   4   66.09    5.25
  -8  -6   3   30.03    4.40
  -8  -6   3   26.93    3.74
  -8   6   3   25.27    3.23
  -8  -6   2    2.12    3.22
  -8   6   2    1.11    1.92
  -8   6   2    0.42    1.95
  -8  -6   1  178.24   13.50
  -8   6   1  172.61   11.97
  -8   6   1  208.75   11.86
  -8  -6   0  273.97   17.42
  -8   6   0  247.11   15.92
  -8   6   0  273.92   15.69
  -8  -6  -1    3.11    3.80
  -8   6  -1    5.89    2.05
  -8   6  -1    4.65    2.05
  -8  -6  -2    4.42    3.35
  -8   6  -2    0.44    1.56
  -8   6  -3   31.96    3.33
   8   7  -7   19.11    2.69
  -8  -7   7   19.08    3.99
  -8  -7   6   40.34    4.92
  -8  -7   5  422.46   24.52
  -8  -7   4  137.56    9.53
  -8  -7   3    2.76    2.95
  -8  -7   3   -0.95    2.61
  -8   7   3    3.22    1.89
  -8  -7   2   19.96    4.19
  -8   7   2   17.22    2.79
  -8  -7   1   80.01    7.28
  -8   7   1   64.34    5.52
  -8  -7   0   45.94    5.80
  -8   7   0   35.45    3.82
  -8  -7  -1   10.43    4.40
  -8   7  -1    6.28    1.96
  -8  -7  -2   17.49    4.26
  -8   7  -2   19.32    2.51
  -8  -8   6   26.97    4.18
   8   8  -5    8.33    2.07
  -8  -8   5   11.03    3.17
  -8  -8   4  207.02   12.35
  -8   8   4  180.06   11.65
  -8   8   3   10.44    2.09
  -8  -8   2    3.31    3.09
  -8   8   2    0.85    1.47
  -8  -8   1   36.23    4.96
  -8   8   1   23.21    2.91
  -8  -8   0  152.47   10.75
  -8   8   0  133.97    8.93
  -8  -8  -1   40.66    5.54
  -8   8  -1   35.74    3.32
  -9   0   8   -1.28    2.13
  -9   0   7    1.96    2.42
  -9   0   6    1.13    2.48
  -9   0   5    4.73    2.54
  -9   0   4    1.36    2.11
  -9   0   3   70.18    5.97
  -9   0   2   -1.08    2.47
  -9   0   1  167.90   11.10
  -9   0   0   -1.94    2.28
  -9   0  -1    9.41    2.71
  -9   0  -2   -0.26    2.13
  -9  -1   8   24.38    3.84
  -9   1   8   34.70    3.64
  -9   1   7   93.06    7.16
  -9  -1   7  101.53    7.83
  -9   1   6   14.76    2.91
  -9  -1   6   16.24    3.28
  -9   1   5   97.61    7.32
  -9  -1   5   95.45    7.56
  -9   1   4   49.51    4.79
  -9  -1   4   50.06    4.94
  -9   1   3    0.26    2.15
  -9  -1   3    1.63    2.22
  -9   1   2    6.35    2.37
  -9  -1   2    4.58    2.40
  -9   1   1  168.61   10.83
  -9  -1   1  152.51   10.61
  -9  -1   0    7.27    2.92
  -9   1   0    7.42    2.48
  -9  -1   0    4.36    2.33
  -9   1  -1   45.33    4.61
  -9  -1  -1   39.87    4.44
  -9  -1  -1   44.14    5.14
  -9  -1  -2   17.15    3.39
  -9   1  -2   15.65    2.91
  -9  -1  -2   20.25    3.09
  -9   2   7    0.42    1.72
  -9  -2   7    0.31    2.54
  -9   2   6  145.07    9.89
  -9  -2   6  160.87   10.76
  -9   2   5    9.26    2.44
  -9  -2   5    3.82    2.46
  -9   2   5    5.13    2.29
  -9   2   4   23.57    3.44
  -9  -2   4   34.66    4.09
  -9   2   4   30.68    3.58
  -9   2   3   81.34    6.43
  -9  -2   3   84.89    6.67
  -9   2   3   80.89    6.19
  -9   2   2  152.13    9.86
  -9  -2   2  138.87    9.83
  -9   2   2  145.35    9.39
  -9   2   1   52.11    4.79
  -9  -2   1   45.61    4.73
  -9   2   1   42.09    4.08
  -9  -2   0   36.55    4.72
  -9   2   0   35.63    3.53
  -9   2   0   35.94    4.06
  -9  -2   0   35.13    4.04
  -9  -2  -1    1.84    2.42
  -9   2  -1    2.89    2.22
  -9  -2  -1    2.08    2.20
  -9  -2  -2    2.34    2.50
  -9  -2  -2    0.94    1.90
  -9   3   7   99.46    6.97
  -9   3   6   93.28    6.75
  -9   3   5   10.33    2.41
  -9   3   4  103.48    7.24
  -9   3   3   12.55    2.54
  -9   3   2   83.65    6.10
  -9   3   1   17.43    2.59
  -9  -3   0    9.48    3.00
  -9   3   0   11.08    2.14
  -9  -3  -1    8.99    2.87
  -9   4   6  319.65   18.36
  -9   4   5    7.20    2.06
  -9   4   4    6.14    2.09
  -9   4   3   31.48    3.51
  -9   4   3   41.32    3.70
  -9   4   2  213.58   12.80
  -9   4   1   15.09    2.46
  -9  -4   0    2.64    2.38
  -9  -4  -1   40.31    4.69
  -9   5   5   40.49    3.59
  -9   5   4   41.19    3.92
  -9   5   4   50.84    4.00
  -9   5   3   17.92    2.59
  -9   5   3   27.53    2.88
  -9   5   2   95.62    7.23
  -9   5   2  126.99    7.41
  -9  -5   1   12.77    4.57
  -9   5   1   16.61    2.32
   0   0   0    0.00    0.00


TITL 23155_a-231_auto in P2(1)/n
REM P2(1)/n (#14 in standard setting)
CELL 1.54184   7.962992  13.085794  12.918606  90.0000 101.2676  90.0000
ZERR    3.00   0.000272   0.000446   0.000389   0.0000   0.0031   0.0000
LATT  1
SYMM -x+1/2, y+1/2,-z+1/2
SFAC C H N F I
UNIT 42.00 18.00 6.00 9.00 9.00
REM  CrysAlisPro recorded range (K): Min=99.8; max=100.1; aver:100.0
TEMP -173
TREF
HKLF 4
END
_computing_structure_solution     'SHELXT 2014/5 (Sheldrick, 2014)'
_computing_structure_solution     'SHELXT 2018/2 (Sheldrick, 2018)'
;
_shelx_hkl_checksum                62176
_olex2_submission_special_instructions  'No special instructions were received'
_oxdiff_exptl_absorpt_empirical_details
;
Empirical correction (ABSPACK) includes:
- Absorption correction using spherical harmonics
- Frame scaling
;
# start Validation Reply Form
_vrf_PLAT315_2ver0-23155_a-231
;
PROBLEM: Singly Bonded Carbon Detected (H-atoms Missing).         C1 Check 
RESPONSE: C1 is isocyanide carbon atom
;
# end Validation Reply Form
