# Supplementary material for: Halogen Bonding Involving Isomeric Isocyanide/Nitrile Groups
Source: Preprints.org preprint supplement (doi:10.20944/preprints202307.1937.v1), 2023-07-28
Supplement: Supplementary file 7 [file supplementary › A389_beaker_auto.cif]

data_a389_beaker_auto
_audit_creation_date               2023-06-28
_audit_creation_method
;
Olex2 1.5
(compiled 2023.03.06 svn.rbb2c1857 for OlexSys, GUI svn.r6748)
;
_shelx_SHELXL_version_number       '2018/3'
_audit_contact_author_address      ?
_audit_contact_author_email        ?
_audit_contact_author_name         ''
_audit_contact_author_phone        ?
_publ_contact_author_id_orcid      ?
_publ_section_references
;
Dolomanov, O.V., Bourhis, L.J., Gildea, R.J, Howard, J.A.K. & Puschmann, H.
 (2009), J. Appl. Cryst. 42, 339-341.

Sheldrick, G.M. (2015). Acta Cryst. A71, 3-8.

Sheldrick, G.M. (2015). Acta Cryst. C71, 3-8.
;
_chemical_name_common              ?
_chemical_name_systematic          ?
_chemical_formula_moiety           'C6 F3 I3, C4 H2 N'
_chemical_formula_sum              'C10 H2 F3 I3 N'
_chemical_formula_weight           573.83
_chemical_melting_point            ?
_chemical_oxdiff_formula           'C H N F I '
loop_
  _atom_type_symbol
  _atom_type_description
  _atom_type_scat_dispersion_real
  _atom_type_scat_dispersion_imag
  _atom_type_scat_source
 'C' 'C' 0.0181 0.0091 'International Tables Vol C Tables 4.2.6.8 and 6.1.1.4'
 'H' 'H' 0.0000 0.0000 'International Tables Vol C Tables 4.2.6.8 and 6.1.1.4'
 'F' 'F' 0.0727 0.0534 'International Tables Vol C Tables 4.2.6.8 and 6.1.1.4'
 'I' 'I' -0.3257 6.8362 'International Tables Vol C Tables 4.2.6.8 and 6.1.1.4'
 'N' 'N' 0.0311 0.0180 'International Tables Vol C Tables 4.2.6.8 and 6.1.1.4'

_shelx_space_group_comment
;
The symmetry employed for this shelxl refinement is uniquely defined
by the following loop, which should always be used as a source of
symmetry information in preference to the above space-group names.
They are only intended as comments.
;
_space_group_crystal_system        'monoclinic'
_space_group_IT_number             14
_space_group_name_H-M_alt          'P 1 21/n 1'
_space_group_name_Hall             '-P 2yn'
loop_
  _space_group_symop_operation_xyz
 'x, y, z'
 '-x+1/2, y+1/2, -z+1/2'
 '-x, -y, -z'
 'x-1/2, -y-1/2, z-1/2'

_cell_length_a                     7.8302(2)
_cell_length_b                     13.2296(3)
_cell_length_c                     12.8690(3)
_cell_angle_alpha                  90
_cell_angle_beta                   100.464(2)
_cell_angle_gamma                  90
_cell_volume                       1310.93(5)
_cell_formula_units_Z              4
_cell_measurement_reflns_used      7913
_cell_measurement_temperature      100.0(3)
_cell_measurement_theta_max        79.3490
_cell_measurement_theta_min        4.8130
_shelx_estimated_absorpt_T_max     ?
_shelx_estimated_absorpt_T_min     ?
_exptl_absorpt_coefficient_mu      56.347
_exptl_absorpt_correction_T_max    1.00000
_exptl_absorpt_correction_T_min    0.27579
_exptl_absorpt_correction_type     multi-scan
_exptl_absorpt_process_details
;
CrysAlisPro 1.171.41.103a (Rigaku Oxford Diffraction, 2021)
Empirical absorption correction using spherical harmonics,
implemented in SCALE3 ABSPACK scaling algorithm.
;
_exptl_absorpt_special_details     ?
_exptl_crystal_colour              'clear colourless'
_exptl_crystal_colour_lustre       clear
_exptl_crystal_colour_primary      colourless
_exptl_crystal_density_diffrn      2.907
_exptl_crystal_density_meas        ?
_exptl_crystal_density_method      ?
_exptl_crystal_description         plate
_exptl_crystal_F_000               1020
_exptl_crystal_size_max            0.15
_exptl_crystal_size_mid            0.14
_exptl_crystal_size_min            0.1
_exptl_transmission_factor_max     ?
_exptl_transmission_factor_min     ?
_diffrn_reflns_av_R_equivalents    0.0994
_diffrn_reflns_av_unetI/netI       0.0533
_diffrn_reflns_Laue_measured_fraction_full  1.000
_diffrn_reflns_Laue_measured_fraction_max  1.000
_diffrn_reflns_limit_h_max         7
_diffrn_reflns_limit_h_min         -9
_diffrn_reflns_limit_k_max         16
_diffrn_reflns_limit_k_min         -16
_diffrn_reflns_limit_l_max         15
_diffrn_reflns_limit_l_min         -15
_diffrn_reflns_number              17886
_diffrn_reflns_point_group_measured_fraction_full  1.000
_diffrn_reflns_point_group_measured_fraction_max  1.000
_diffrn_reflns_theta_full          67.684
_diffrn_reflns_theta_max           72.481
_diffrn_reflns_theta_min           4.836
_diffrn_ambient_environment        N~2~
_diffrn_ambient_temperature        100.0(3)
_diffrn_detector                   'Hybrid Pixel Array Detector'
_diffrn_detector_area_resol_mean   10.0000
_diffrn_detector_type              HyPix
_diffrn_measured_fraction_theta_full  1.000
_diffrn_measured_fraction_theta_max  1.000
_diffrn_measurement_details
;
List of Runs (angles in degrees, time in seconds):

  # Type    Start    End  Width  t~exp~   \w     \q     \k     \f   Frames
--------------------------------------------------------------------------
  1  \w    -68.00 -21.00   0.50    0.05    --  -47.38 107.00 131.00   94
  2  \w     15.00  72.00   0.50    0.05    --   47.38-107.00  33.00  114
  3  \w   -132.00-107.00   0.50    0.13    -- -106.00-107.00  33.00   50
  4  \w   -106.00 -33.00   0.50    0.13    -- -106.00 107.00 131.00  146
  5  \w     65.00 105.00   0.50    0.13    --  113.25-107.00  33.00   80
  6  \w    115.00 164.00   0.50    0.13    --  113.25 107.00 131.00   98
  7  \w   -118.00 -75.00   0.50    0.05    --  -47.38-125.00-180.00   86
  8  \w     74.00  99.00   0.50    0.05    --   47.38 125.00 -90.00   50
  9  \w     75.00 120.00   0.50    0.05    --   47.38 125.00 -30.00   90
 10  \w     78.00 109.00   0.50    0.05    --   47.38 125.00-180.00   62
 11  \w    -26.00  21.00   0.50    0.05    --   47.38 -19.00 -90.00   94
 12  \w     78.00 109.00   0.50    0.05    --   47.38 125.00  60.00   62
 13  \w    -59.00 -34.00   0.50    0.13    -- -106.00  61.00   0.00   50
 14  \w    -60.00 -34.00   0.50    0.13    -- -106.00  77.00 120.00   52
 15  \w    -71.00 -36.00   0.50    0.13    -- -106.00  61.00 -30.00   70
 16  \w    -59.00 -33.00   0.50    0.13    -- -106.00  61.00 150.00   52
 17  \w    -59.00 -33.00   0.50    0.13    -- -106.00  77.00  90.00   52
 18  \w    -71.00 -37.00   0.50    0.13    -- -106.00  61.00  90.00   68
 19  \w   -102.00 -75.00   0.50    0.13    -- -106.00  77.00  90.00   54
 20  \w    -71.00 -34.00   0.50    0.13    -- -106.00  61.00 -60.00   74
 21  \w    -91.00 -66.00   0.50    0.13    -- -106.00  77.00 120.00   50
 22  \w    107.00 172.00   0.50    0.13    --  113.25  45.00 120.00  130
 23  \w     59.00  85.00   0.50    0.13    --  113.25 -77.00 -60.00   52
 24  \w     42.00  67.00   0.50    0.13    --  113.25 -61.00 -90.00   50
 25  \w     45.00  70.00   0.50    0.13    --  113.25 -61.00   0.00   50
 26  \w     44.00 101.00   0.50    0.13    --  113.25 -77.00  60.00  114
 27  \w     46.00  71.00   0.50    0.13    --  113.25 -61.00-150.00   50
 28  \w    101.00 161.00   0.50    0.13    --  113.25  15.00 -60.00  120
 29  \w    111.00 178.00   0.50    0.13    --  113.25  61.00  90.00  134
 30  \w     -1.00  25.00   0.50    0.05    --   47.38-107.00  33.00   52
 31  \w    -53.00 -26.00   0.50    0.05    --  -47.38  57.00-150.00   54
 32  \w    -14.00  19.00   0.50    0.05    --  -47.38  57.00-150.00   66
 33  \w    -22.00  24.00   0.50    0.05    --  -47.38  19.00 150.00   92
 34  \w     54.00  80.00   0.50    0.05    --   47.38-125.00 -30.00   52
 35  \w    -27.00  26.00   0.50    0.05    --   47.38 -19.00 -30.00  106
 36  \w     60.00  85.00   0.50    0.05    --   47.38-107.00  33.00   50
 37  \w   -175.00-135.00   0.50    0.13    -- -106.00 -77.00 -60.00   80
 38  \w   -108.00 -82.00   0.50    0.13    -- -106.00 109.00 -59.89   52
 39  \w   -116.00 -83.00   0.50    0.13    -- -106.00 -77.00 -60.00   66
 40  \w   -175.00-133.00   0.50    0.13    -- -106.00 -77.00 -30.00   84
 41  \w    -70.00 -44.00   0.50    0.13    -- -106.00 153.00-121.98   52
 42  \w   -110.00 -84.00   0.50    0.13    -- -106.00 -77.00 -30.00   52
 43  \w   -118.00 -93.00   0.50    0.13    -- -106.00 -30.00 -60.00   50
 44  \w   -116.00 -90.00   0.50    0.13    -- -106.00 131.00 -53.78   52
 45  \w    -58.00 -33.00   0.50    0.13    -- -106.00 110.00  67.62   50
 46  \w   -131.00 -91.00   0.50    0.13    -- -106.00 153.00-121.98   80
 47  \w     80.00 106.00   0.50    0.13    --  113.25-107.00  33.00   52
 48  \w     42.00 109.00   0.50    0.13    --  113.25-125.00-150.00  134
 49  \w    102.00 153.00   0.50    0.13    --  113.25  45.00-150.00  102
 50  \w     75.00 101.00   0.50    0.13    --  113.25-125.00 -30.00   52
 51  \w     81.00 110.00   0.50    0.13    --  113.25-125.00 -90.00   58
 52  \w     79.00 105.00   0.50    0.13    --  113.25-125.00 -60.00   52
 53  \w     71.00 108.00   0.50    0.13    --  113.25-106.00-166.83   74
 54  \w    104.00 154.00   0.50    0.13    --  113.25  61.00 -60.00  100
 55  \w     42.00  77.00   0.50    0.13    --  113.25-125.00 -60.00   70
 56  \w     44.00  69.00   0.50    0.13    --  113.25 -61.00  90.00   50
 57  \w    133.00 160.00   0.50    0.13    --  113.25  77.00  60.00   54
 58  \w    141.00 172.00   0.50    0.13    --  113.25  77.00 120.00   62
 59  \w     68.00 109.00   0.50    0.13    --  113.25-125.00  30.00   82
 60  \w     95.00 133.00   0.50    0.13    --  113.25  77.00 120.00   76
 61  \w     46.00 110.00   0.50    0.13    --  113.25-125.00-180.00  128
;
_diffrn_measurement_device         'four-circle diffractometer'
_diffrn_measurement_device_type   
 'XtaLAB Synergy, Single source at home/near, HyPix'
_diffrn_measurement_method         '\w scans'
_diffrn_orient_matrix_type        
 'CrysAlisPro convention (1999,Acta A55,543-557)'
_diffrn_orient_matrix_UB_11        -0.0443709000
_diffrn_orient_matrix_UB_12        -0.0140714000
_diffrn_orient_matrix_UB_13        -0.1207477000
_diffrn_orient_matrix_UB_21        -0.0407433000
_diffrn_orient_matrix_UB_22        -0.1123746000
_diffrn_orient_matrix_UB_23        0.0154726000
_diffrn_orient_matrix_UB_31        -0.1907220000
_diffrn_orient_matrix_UB_32        0.0272092000
_diffrn_orient_matrix_UB_33        0.0016044000
_diffrn_radiation_monochromator    mirror
_diffrn_radiation_probe            x-ray
_diffrn_radiation_type             'Cu K\a'
_diffrn_radiation_wavelength       1.54184
_diffrn_source                     'micro-focus sealed X-ray tube'
_diffrn_source_type                'PhotonJet (Cu) X-ray Source'
_reflns_Friedel_coverage           0.000
_reflns_Friedel_fraction_full      .
_reflns_Friedel_fraction_max       .
_reflns_number_gt                  2357
_reflns_number_total               2600
_reflns_special_details
;
 Reflections were merged by SHELXL according to the crystal
 class for the calculation of statistics and refinement.
 
 _reflns_Friedel_fraction is defined as the number of unique
 Friedel pairs measured divided by the number that would be
 possible theoretically, ignoring centric projections and
 systematic absences.
;
_reflns_threshold_expression       'I > 2\s(I)'
_computing_cell_refinement         'CrysAlisPro 1.171.41.103a (Rigaku OD, 2021)'
_computing_data_collection         'CrysAlisPro 1.171.41.103a (Rigaku OD, 2021)'
_computing_data_reduction          'CrysAlisPro 1.171.41.103a (Rigaku OD, 2021)'
_computing_molecular_graphics      'Olex2 1.5 (Dolomanov et al., 2009)'
_computing_publication_material    'Olex2 1.5 (Dolomanov et al., 2009)'
_computing_structure_refinement    'SHELXL 2018/3 (Sheldrick, 2015)'
_computing_structure_solution      'SHELXT 2018/2 (Sheldrick, 2018)'
_refine_diff_density_max           1.353
_refine_diff_density_min           -1.304
_refine_diff_density_rms           0.246
_refine_ls_extinction_coef         .
_refine_ls_extinction_method       none
_refine_ls_goodness_of_fit_ref     1.067
_refine_ls_hydrogen_treatment      constr
_refine_ls_matrix_type             full
_refine_ls_number_parameters       154
_refine_ls_number_reflns           2600
_refine_ls_number_restraints       0
_refine_ls_R_factor_all            0.0386
_refine_ls_R_factor_gt             0.0353
_refine_ls_restrained_S_all        1.067
_refine_ls_shift/su_max            0.001
_refine_ls_shift/su_mean           0.000
_refine_ls_structure_factor_coef   Fsqd
_refine_ls_weighting_details      
 'w=1/[\s^2^(Fo^2^)+(0.0530P)^2^+0.2186P] where P=(Fo^2^+2Fc^2^)/3'
_refine_ls_weighting_scheme        calc
_refine_ls_wR_factor_gt            0.0914
_refine_ls_wR_factor_ref           0.0940
_refine_special_details            ?
_olex2_refinement_description
;
1.a Aromatic/amide H refined with riding coordinates:
 C00G(H00G), C00H(H00H)
;
_atom_sites_solution_hydrogens     geom
_atom_sites_solution_primary       dual
_atom_sites_solution_secondary     ?
loop_
  _atom_site_label
  _atom_site_type_symbol
  _atom_site_fract_x
  _atom_site_fract_y
  _atom_site_fract_z
  _atom_site_U_iso_or_equiv
  _atom_site_adp_type
  _atom_site_occupancy
  _atom_site_site_symmetry_order
  _atom_site_calc_flag
  _atom_site_refinement_flags_posn
  _atom_site_refinement_flags_adp
  _atom_site_refinement_flags_occupancy
  _atom_site_disorder_assembly
  _atom_site_disorder_group
 I001 I 0.38257(4) 0.30671(2) 0.52739(3) 0.01561(13) Uani 1 1 d . . . . .
 I002 I 0.11721(5) 0.69387(3) 0.68736(3) 0.02203(14) Uani 1 1 d . . . . .
 I003 I 0.14661(5) 0.65272(3) 0.22561(3) 0.02233(14) Uani 1 1 d . . . . .
 F004 F 0.2989(4) 0.4402(3) 0.3179(3) 0.0211(7) Uani 1 1 d . . . . .
 F005 F 0.0703(4) 0.7350(2) 0.4415(3) 0.0215(7) Uani 1 1 d . . . . .
 F006 F 0.2639(4) 0.4715(2) 0.6763(3) 0.0210(7) Uani 1 1 d . . . . .
 N007 N 0.5653(7) 0.1130(4) 0.5679(4) 0.0237(11) Uani 1 1 d . . . . .
 C008 C 0.1794(7) 0.5881(4) 0.3755(4) 0.0173(11) Uani 1 1 d . . . . .
 C009 C 0.1669(7) 0.6068(4) 0.5622(4) 0.0156(10) Uani 1 1 d . . . . .
 C00A C 0.2779(7) 0.4521(4) 0.4968(5) 0.0156(10) Uani 1 1 d . . . . .
 C00B C 0.8489(7) 0.0368(4) 0.5245(4) 0.0164(10) Uani 1 1 d . . . . .
 C00C C 0.6911(7) 0.0788(4) 0.5499(4) 0.0174(11) Uani 1 1 d . . . . .
 C00D C 0.1388(7) 0.6424(4) 0.4594(5) 0.0149(10) Uani 1 1 d . . . . .
 C00E C 0.2499(7) 0.4936(4) 0.3963(4) 0.0154(11) Uani 1 1 d . . . . .
 C00F C 0.2362(7) 0.5099(4) 0.5784(4) 0.0165(11) Uani 1 1 d . . . . .
 C00G C 0.8455(8) -0.0059(4) 0.4259(5) 0.0185(11) Uani 1 1 d . . . . .
 H00G H 0.739702 -0.009381 0.376417 0.022 Uiso 1 1 calc R U . . .
 C00H C 0.9971(8) -0.0433(4) 0.4000(5) 0.0189(11) Uani 1 1 d . . . . .
 H00H H 0.997329 -0.072800 0.332770 0.023 Uiso 1 1 calc R U . . .

loop_
  _atom_site_aniso_label
  _atom_site_aniso_U_11
  _atom_site_aniso_U_22
  _atom_site_aniso_U_33
  _atom_site_aniso_U_23
  _atom_site_aniso_U_13
  _atom_site_aniso_U_12
 I001 0.0187(2) 0.0138(2) 0.0138(2) -0.00013(10) 0.00168(14) 0.00086(11)
 I002 0.0277(2) 0.0212(2) 0.0175(2) -0.00610(12) 0.00482(16) 0.00285(13)
 I003 0.0310(2) 0.0213(2) 0.0143(2) 0.00541(12) 0.00322(15) 0.00021(14)
 F004 0.0321(17) 0.0196(16) 0.0130(16) -0.0018(12) 0.0078(14) 0.0019(14)
 F005 0.0277(17) 0.0137(16) 0.0232(17) 0.0023(13) 0.0053(14) 0.0059(13)
 F006 0.0318(17) 0.0174(16) 0.0132(16) 0.0023(12) 0.0027(13) 0.0057(13)
 N007 0.026(3) 0.019(2) 0.027(3) 0.002(2) 0.004(2) 0.006(2)
 C008 0.022(3) 0.019(3) 0.012(2) 0.0027(19) 0.004(2) -0.007(2)
 C009 0.017(2) 0.014(2) 0.016(3) -0.0065(19) 0.005(2) -0.005(2)
 C00A 0.016(2) 0.011(2) 0.019(3) 0.0027(19) 0.004(2) -0.0004(19)
 C00B 0.020(3) 0.010(2) 0.018(3) 0.0018(19) -0.001(2) -0.001(2)
 C00C 0.023(3) 0.012(2) 0.016(3) 0.0019(19) 0.002(2) 0.000(2)
 C00D 0.013(2) 0.010(2) 0.020(3) -0.001(2) 0.000(2) -0.0050(18)
 C00E 0.022(3) 0.015(3) 0.010(3) -0.0002(19) 0.003(2) -0.004(2)
 C00F 0.019(3) 0.018(3) 0.012(3) 0.0018(19) 0.002(2) -0.001(2)
 C00G 0.019(3) 0.020(3) 0.015(3) 0.001(2) 0.001(2) 0.000(2)
 C00H 0.027(3) 0.018(3) 0.012(2) 0.002(2) 0.004(2) 0.006(2)

_geom_special_details
;
 All esds (except the esd in the dihedral angle between two l.s. planes)
 are estimated using the full covariance matrix.  The cell esds are taken
 into account individually in the estimation of esds in distances, angles
 and torsion angles; correlations between esds in cell parameters are only
 used when they are defined by crystal symmetry.  An approximate (isotropic)
 treatment of cell esds is used for estimating esds involving l.s. planes.
;
loop_
  _geom_bond_atom_site_label_1
  _geom_bond_atom_site_label_2
  _geom_bond_distance
  _geom_bond_site_symmetry_2
  _geom_bond_publ_flag
 I001 C00A 2.100(5) . ?
 I002 C009 2.074(5) . ?
 I003 C008 2.083(5) . ?
 F004 C00E 1.343(6) . ?
 F005 C00D 1.340(6) . ?
 F006 C00F 1.340(6) . ?
 N007 C00C 1.145(8) . ?
 C008 C00D 1.381(8) . ?
 C008 C00E 1.373(8) . ?
 C009 C00D 1.384(8) . ?
 C009 C00F 1.392(8) . ?
 C00A C00E 1.386(8) . ?
 C00A C00F 1.385(8) . ?
 C00B C00C 1.445(8) . ?
 C00B C00G 1.385(8) . ?
 C00B C00H 1.407(8) 3_756 ?
 C00G H00G 0.9500 . ?
 C00G C00H 1.382(8) . ?
 C00H H00H 0.9500 . ?

loop_
  _geom_angle_atom_site_label_1
  _geom_angle_atom_site_label_2
  _geom_angle_atom_site_label_3
  _geom_angle
  _geom_angle_site_symmetry_1
  _geom_angle_site_symmetry_3
  _geom_angle_publ_flag
 C00D C008 I003 120.2(4) . . ?
 C00E C008 I003 122.1(4) . . ?
 C00E C008 C00D 117.6(5) . . ?
 C00D C009 I002 122.3(4) . . ?
 C00D C009 C00F 116.5(5) . . ?
 C00F C009 I002 121.2(4) . . ?
 C00E C00A I001 121.8(4) . . ?
 C00F C00A I001 120.1(4) . . ?
 C00F C00A C00E 118.0(5) . . ?
 C00G C00B C00C 119.3(5) . . ?
 C00G C00B C00H 121.9(5) . 3_756 ?
 C00H C00B C00C 118.8(5) 3_756 . ?
 N007 C00C C00B 178.5(6) . . ?
 F005 C00D C008 118.9(5) . . ?
 F005 C00D C009 117.7(5) . . ?
 C008 C00D C009 123.4(5) . . ?
 F004 C00E C008 119.5(5) . . ?
 F004 C00E C00A 118.3(5) . . ?
 C008 C00E C00A 122.1(5) . . ?
 F006 C00F C009 118.8(5) . . ?
 F006 C00F C00A 118.9(5) . . ?
 C00A C00F C009 122.3(5) . . ?
 C00B C00G H00G 120.2 . . ?
 C00H C00G C00B 119.5(5) . . ?
 C00H C00G H00G 120.2 . . ?
 C00B C00H H00H 120.7 3_756 . ?
 C00G C00H C00B 118.6(5) . 3_756 ?
 C00G C00H H00H 120.7 . . ?

loop_
  _geom_torsion_atom_site_label_1
  _geom_torsion_atom_site_label_2
  _geom_torsion_atom_site_label_3
  _geom_torsion_atom_site_label_4
  _geom_torsion
  _geom_torsion_site_symmetry_1
  _geom_torsion_site_symmetry_2
  _geom_torsion_site_symmetry_3
  _geom_torsion_site_symmetry_4
  _geom_torsion_publ_flag
 I001 C00A C00E F004 -3.0(7) . . . . ?
 I001 C00A C00E C008 179.2(4) . . . . ?
 I001 C00A C00F F006 0.0(7) . . . . ?
 I001 C00A C00F C009 179.8(4) . . . . ?
 I002 C009 C00D F005 -2.9(7) . . . . ?
 I002 C009 C00D C008 176.4(4) . . . . ?
 I002 C009 C00F F006 2.8(7) . . . . ?
 I002 C009 C00F C00A -177.0(4) . . . . ?
 I003 C008 C00D F005 3.3(7) . . . . ?
 I003 C008 C00D C009 -176.0(4) . . . . ?
 I003 C008 C00E F004 -0.3(7) . . . . ?
 I003 C008 C00E C00A 177.5(4) . . . . ?
 C00B C00G C00H C00B 0.0(9) . . . 3_756 ?
 C00C C00B C00G C00H 178.0(5) . . . . ?
 C00D C008 C00E F004 -176.8(5) . . . . ?
 C00D C008 C00E C00A 1.0(8) . . . . ?
 C00D C009 C00F F006 -179.2(5) . . . . ?
 C00D C009 C00F C00A 1.0(8) . . . . ?
 C00E C008 C00D F005 179.8(5) . . . . ?
 C00E C008 C00D C009 0.6(8) . . . . ?
 C00E C00A C00F F006 -179.3(5) . . . . ?
 C00E C00A C00F C009 0.5(8) . . . . ?
 C00F C009 C00D F005 179.2(4) . . . . ?
 C00F C009 C00D C008 -1.5(8) . . . . ?
 C00F C00A C00E F004 176.4(5) . . . . ?
 C00F C00A C00E C008 -1.5(8) . . . . ?
 C00H C00B C00G C00H -0.1(9) 3_756 . . . ?

_shelx_res_file
;
TITL a389_beaker_auto_a.res in P2(1)/n
    a389_beaker_auto.res
    created by SHELXL-2018/3 at 17:15:02 on 02-Jun-2023
REM Old TITL a389_beaker_auto_a.res in P2(1)/n
REM SHELXT solution in P2(1)/n: R1 0.080, Rweak 0.007, Alpha 0.013
REM <I/s> 0.442 for 129 systematic absences, Orientation as input
REM Formula found by SHELXT: C10 F3 I3 N
CELL 1.54184 7.8302 13.2296 12.869 90 100.464 90
ZERR 4 0.0002 0.0003 0.0003 0 0.002 0
LATT 1
SYMM 0.5-X,0.5+Y,0.5-Z
SFAC C H F I N
UNIT 40 8 12 12 4

L.S. 26 0 0
PLAN  2
TEMP -173
CONF
BOND
list 4
MORE -1
BOND $H
fmap 2 53
acta
OMIT -4 145
REM <olex2.extras>
REM <HklSrc "%.\\A389_beaker_auto.hkl">
REM </olex2.extras>

WGHT    0.053000    0.218600
FVAR       0.19356
I001  4    0.382573    0.306709    0.527387    11.00000    0.01868    0.01383 =
         0.01383   -0.00013    0.00168    0.00086
I002  4    0.117210    0.693874    0.687364    11.00000    0.02770    0.02116 =
         0.01748   -0.00610    0.00482    0.00285
I003  4    0.146611    0.652723    0.225607    11.00000    0.03102    0.02130 =
         0.01433    0.00541    0.00322    0.00021
F004  3    0.298931    0.440225    0.317926    11.00000    0.03209    0.01965 =
         0.01296   -0.00181    0.00778    0.00186
F005  3    0.070274    0.734958    0.441482    11.00000    0.02771    0.01375 =
         0.02319    0.00228    0.00534    0.00587
F006  3    0.263945    0.471496    0.676338    11.00000    0.03178    0.01743 =
         0.01318    0.00227    0.00271    0.00573
N007  5    0.565345    0.113036    0.567878    11.00000    0.02578    0.01866 =
         0.02650    0.00174    0.00443    0.00550
C008  1    0.179397    0.588113    0.375525    11.00000    0.02172    0.01899 =
         0.01161    0.00274    0.00444   -0.00678
C009  1    0.166881    0.606770    0.562188    11.00000    0.01744    0.01373 =
         0.01634   -0.00650    0.00495   -0.00506
C00A  1    0.277864    0.452108    0.496841    11.00000    0.01644    0.01119 =
         0.01921    0.00267    0.00370   -0.00037
C00B  1    0.848894    0.036804    0.524532    11.00000    0.01985    0.01013 =
         0.01785    0.00178   -0.00050   -0.00072
C00C  1    0.691057    0.078800    0.549876    11.00000    0.02344    0.01216 =
         0.01599    0.00193    0.00187    0.00003
C00D  1    0.138809    0.642400    0.459387    11.00000    0.01327    0.01046 =
         0.01968   -0.00053   -0.00030   -0.00497
C00E  1    0.249857    0.493599    0.396250    11.00000    0.02185    0.01451 =
         0.00984   -0.00016    0.00266   -0.00408
C00F  1    0.236174    0.509931    0.578374    11.00000    0.01873    0.01850 =
         0.01220    0.00183    0.00239   -0.00148
C00G  1    0.845497   -0.005871    0.425916    11.00000    0.01936    0.01997 =
         0.01544    0.00104    0.00083    0.00050
AFIX  43
H00G  2    0.739702   -0.009381    0.376417    11.00000   -1.20000
AFIX   0
C00H  1    0.997102   -0.043303    0.400050    11.00000    0.02668    0.01827 =
         0.01190    0.00158    0.00383    0.00628
AFIX  43
H00H  2    0.997329   -0.072800    0.332770    11.00000   -1.20000
AFIX   0
HKLF 4


REM  a389_beaker_auto_a.res in P2(1)/n
REM wR2 = 0.0940, GooF = S = 1.067, Restrained GooF = 1.067 for all data
REM R1 = 0.0353 for 2357 Fo > 4sig(Fo) and 0.0386 for all 2600 data
REM 154 parameters refined using 0 restraints

END

WGHT      0.0530      0.2186

REM Highest difference peak  1.353,  deepest hole -1.304,  1-sigma level  0.246
Q1    1   0.2642  0.6445  0.2170  11.00000  0.05    1.13
Q2    1   0.2292  0.7402  0.7182  11.00000  0.05    1.12
;
_shelx_res_checksum                11094
_shelx_hkl_file
;
   0   0  -1    0.74    0.77
   0   0   1    0.13    0.52
   0   0  -2   23.56    3.76
   0   0   2   26.79    3.76
   0   0  -3    0.46    2.03
   0   0   3   -0.78    1.61
   0   0  -4 2523.40  210.56
   0   0   4 2455.04  209.66
   0   0  -5    2.20    2.62
   0   0   5    1.38    2.74
   0   0  -6  175.43   18.90
   0   0   6  231.46   22.21
   0   0  -7    0.53    2.11
   0   0   7    1.06    2.24
   0   0   8  597.37   66.29
   0   0  -8  648.18   63.81
   0   0   8  660.97   61.65
   0   0  -9   -1.93    3.55
   0   0   9    3.99   10.37
   0   0   9   -2.34    3.52
   0   0  -9   -2.63    4.84
   0   0  10   87.34   12.71
   0   0 -10   99.21   12.83
   0   0 -10   67.35   11.51
   0   0 -10   93.30   17.75
   0   0  10   94.96   19.10
   0   0  10   72.44   21.39
   0   0  11    3.52    5.28
   0   0 -11   -1.87    3.30
   0   0 -11    3.83    3.05
   0   0 -11    2.43    3.65
   0   0  11    1.08    2.81
   0   0  12  125.08   15.97
   0   0 -12  106.30   20.62
   0   0 -12  118.13   15.26
   0   0 -12  103.25   14.55
   0   0  13   -0.91    2.37
   0   0 -13   -1.66    2.78
   0   0 -14  196.95   21.43
   0   0  14  246.02   24.69
   0   0  15   -1.30    2.59
   0   0 -16   31.39    4.44
   0   1   0    0.87    1.29
   0  -1   0    0.12    0.50
   0   1   1  434.39   39.28
   0  -1  -1  492.30   40.15
   0  -1   1  481.20   39.29
   0   1  -2  169.24   16.95
   0  -1  -2  198.04   17.65
   0   1  -3   13.23    1.95
   0   1  -3   14.81    3.53
   0  -1   3   17.75    3.19
   0   1  -4 5726.84  502.73
   0   1  -4 6699.45  506.71
   0  -1   4 6814.03  505.48
   0   1   4 6189.42  506.79
   0   1  -5  116.56   12.16
   0   1  -5  141.27   16.12
   0  -1   5  162.29   15.47
   0   1   5  163.97   16.77
   0   1   6  107.86   17.22
   0   1  -6  116.06   15.53
   0   1  -6  111.71   15.37
   0  -1  -6  109.09   15.82
   0   1   6  133.80   15.96
   0   1   7  321.42   33.18
   0   1  -7  215.85   26.27
   0   1   7  297.76   29.64
   0  -1  -7  266.94   30.14
   0   1   8 2089.19  175.60
   0  -1  -8 1612.76  173.58
   0  -1  -8 2131.70  174.48
   0   1   8 2032.86  172.14
   0   1   9  329.50   34.21
   0  -1   9  291.98   32.08
   0  -1   9  328.53   45.79
   0   1   9  272.44   35.21
   0   1   9  280.21   44.82
   0   1  -9  238.36   39.50
   0  -1   9  286.87   38.96
   0   1  -9  255.78   28.15
   0   1  -9  261.71   29.11
   0  -1  -9  329.57   36.30
   0   1 -10  248.81   37.62
   0  -1  10  258.76   37.13
   0   1  10  264.61   43.04
   0  -1  10  246.09   39.38
   0   1  10  273.59   28.44
   0  -1  10  277.13   28.57
   0   1 -10  272.21   27.78
   0  -1 -10  268.12   27.48
   0   1 -10  256.52   27.95
   0  -1 -10  234.08   26.46
   0  -1 -10  227.46   33.15
   0   1 -10  263.69   34.40
   0   1  11  341.59   49.68
   0  -1  11  404.13   47.88
   0  -1  11  411.67   37.40
   0   1  11  449.29   37.82
   0   1 -11  350.42   35.64
   0  -1 -11  380.03   35.82
   0   1 -11  298.28   35.20
   0  -1 -11  300.83   34.10
   0  -1 -11  322.26   42.78
   0   1 -11  316.15   42.45
   0   1  12   96.20   23.14
   0   1 -12  119.44   16.92
   0  -1 -12  147.95   17.29
   0   1 -12  122.18   16.69
   0   1 -12  128.99   22.83
   0  -1 -12  152.64   24.30
   0   1  12  149.44   18.08
   0  -1  12  166.73   18.87
   0  -1  13  362.04   32.98
   0  -1 -13  316.73   31.15
   0   1 -13  309.03   31.69
   0   1 -13  276.50   31.13
   0   1 -14   49.52    7.73
   0  -1  14   37.90    8.61
   0   1 -15   11.25    2.92
   0  -1  15   16.39    4.78
   0  -1 -16   82.41    8.70
   0   2   0 1497.90  125.43
   0  -2   0 1473.68  124.59
   0   2   1  124.99   11.98
   0  -2  -1  129.87   12.85
   0   2   2   62.43    6.60
   0  -2   2   82.05    7.52
   0  -2  -2   81.50    9.08
   0   2  -3  283.14   26.77
   0   2   3  251.85   26.03
   0  -2   3  302.02   25.74
   0  -2  -3  290.41   27.49
   0   2  -4 1275.96  108.72
   0   2   4 1138.04  108.13
   0  -2   4 1357.63  107.34
   0  -2  -4 1217.33  109.33
   0   2  -5 1406.92  127.51
   0   2   5 1431.61  127.77
   0  -2   5 1529.45  125.86
   0  -2  -5 1482.23  128.55
   0   2  -6  289.91   32.54
   0   2  -6  337.20   37.02
   0   2   6  295.32   33.04
   0  -2   6  326.85   31.10
   0   2   6  321.27   33.81
   0  -2  -6  333.66   34.02
   0   2  -7  180.55   23.67
   0   2  -7  182.21   23.36
   0   2   7  193.92   23.66
   0  -2   7  196.20   21.47
   0   2   7  172.55   23.40
   0  -2  -7  175.04   22.96
   0  -2  -7  243.99   25.99
   0  -2   8   88.21   13.24
   0   2   8   98.86   15.97
   0  -2  -8   82.43   15.49
   0   2   8   95.23   16.10
   0  -2   9 1380.24  117.26
   0  -2   9 1430.08  116.08
   0   2   9 1483.83  123.66
   0  -2  -9 1379.15  124.56
   0  -2   9 1326.21  131.17
   0  -2   9 1319.90  131.40
   0   2   9 1481.77  139.39
   0   2  -9 1351.91  138.51
   0   2  -9 1226.18  115.93
   0   2  -9 1185.91  117.21
   0   2 -10    5.66    4.51
   0   2  10    5.74    4.56
   0   2  10    3.03    3.24
   0  -2  10    6.34    3.57
   0   2 -10    3.83    4.09
   0  -2  10    6.46    6.86
   0   2  10    4.07    7.48
   0  -2 -10    2.30    4.90
   0  -2 -10    6.09    3.47
   0   2 -10    4.79    3.54
   0   2 -11  147.04   23.73
   0  -2 -11  125.48   22.48
   0  -2 -11  137.73   16.75
   0   2 -11  122.72   16.74
   0  -2  11  140.14   17.90
   0   2  11  140.86   17.60
   0   2  11  119.38   26.92
   0  -2  11  157.11   27.78
   0   2 -11  129.17   17.65
   0  -2  11  132.81   18.22
   0  -2  12  115.18   16.41
   0   2 -12  156.75   24.41
   0  -2 -12  128.36   15.69
   0   2 -12  131.41   16.69
   0   2 -12  116.28   16.42
   0  -2  13    0.96    2.70
   0   2 -13    7.31    4.23
   0   2 -13    3.59    3.17
   0  -2  14  161.24   16.58
   0   2 -14  124.75   15.28
   0  -2  14  125.60   16.99
   0   2  14  133.33   16.58
   0   2 -15  390.33   36.16
   0  -2  15  392.32   37.50
   0   2  15  330.22   36.49
   0   2 -15  437.99   37.65
   0  -2 -15  485.57   37.67
   0   3   0    0.81    3.43
   0   3   0   -1.39    3.06
   0  -3   0    0.74    1.66
   0   3   1 1335.90  124.21
   0  -3   1 1570.94  124.45
   0  -3  -1 1517.26  124.83
   0  -3  -2   66.96    8.72
   0   3   2   54.71    7.57
   0  -3  -3  572.03   51.69
   0   3  -3  555.04   50.74
   0  -3  -4  339.07   32.72
   0  -3   4  305.65   29.47
   0   3  -4  336.09   31.77
   0  -3  -5  322.52   28.43
   0  -3   5  304.27   24.23
   0   3  -5  331.63   27.45
   0  -3  -6  180.19   21.12
   0  -3   6  144.22   16.79
   0   3   6  156.13   20.73
   0   3  -6  143.32   19.11
   0  -3  -7  468.00   46.21
   0   3   7  442.26   45.87
   0  -3   7  429.79   40.91
   0   3  -7  361.76   46.24
   0   3  -7  434.51   44.40
   0  -3  -8   14.86    6.59
   0   3  -8   18.29    6.66
   0   3  -8    8.19    5.28
   0   3  -8   20.43   13.30
   0  -3   8    6.86    6.92
   0   3   8    6.87    4.55
   0   3   9  708.78   69.43
   0   3   9  802.65   89.59
   0   3  -9  741.98   92.09
   0  -3  -9  828.04   78.32
   0   3   9  898.84   77.96
   0  -3   9  841.68   69.21
   0   3  -9  678.76   68.28
   0   3  -9  681.33   70.94
   0  -3   9  852.27   70.78
   0   3  -9  778.03   69.68
   0  -3  10  435.42   42.17
   0  -3  10  411.58   38.21
   0   3  10  381.55   43.57
   0   3 -10  313.29   35.50
   0  -3  10  450.90   37.18
   0   3 -10  320.07   36.46
   0   3  10  392.50   54.36
   0   3 -10  303.81   51.11
   0  -3  10  346.11   50.11
   0   3 -10  332.86   38.07
   0  -3 -10  401.80   45.45
   0  -3 -11  496.15   55.18
   0   3 -11  536.27   56.02
   0   3 -11  423.53   45.70
   0  -3  11  564.00   48.06
   0  -3  11  499.36   48.92
   0   3 -11  486.35   47.47
   0  -3  11  461.47   59.75
   0   3  11  451.12   60.97
   0   3 -11  315.77   55.02
   0   3 -12   22.66    7.21
   0  -3  12   33.23    7.72
   0   3 -12   44.62    8.45
   0  -3  13 1350.56  108.23
   0   3 -13 1254.27  107.49
   0   3 -13 1079.65  106.86
   0  -3  14  126.26   14.10
   0  -3  14  110.32   14.54
   0   3  14   97.31   13.37
   0  -3  14  110.72   12.76
   0   3 -14  100.80   13.18
   0  -3  15   13.41    4.28
   0   3 -15   10.55    3.61
   0  -3 -15   15.61    3.80
   0   3 -15   12.38    3.43
   0  -4   0   26.30    4.76
   0   4   0   25.69    6.57
   0   4   0   16.59    4.65
   0  -4  -1    8.98    3.27
   0  -4   1    6.61    2.67
   0   4   1    9.88    3.33
   0   4   1    5.61    5.49
   0  -4  -2  657.13   55.11
   0   4   2  557.19   53.64
   0  -4  -3  355.97   30.64
   0   4   3  270.11   25.57
   0  -4  -4  369.49   37.01
   0   4  -4  358.83   35.98
   0  -4  -5 3378.63  272.96
   0   4  -5 3033.40  271.06
   0  -4  -6  327.34   35.79
   0   4  -6  313.37   34.35
   0  -4  -7    8.55    4.87
   0   4   7   10.38    5.56
   0   4  -7    7.52    6.56
   0   4  -7   12.09    5.38
   0   4  -8  124.00   30.59
   0   4  -8  115.44   18.56
   0   4  -8   92.59   18.75
   0  -4  -8  132.50   20.28
   0   4   8  105.98   18.42
   0  -4  -9 1909.61  157.09
   0   4   9 1844.93  155.20
   0   4  -9 1762.34  154.59
   0   4  -9 1387.21  145.34
   0  -4   9 1917.68  146.63
   0  -4   9 1714.04  147.62
   0   4   9 2000.14  170.83
   0   4  -9 2123.45  180.99
   0   4  -9 1564.21  149.02
   0   4  -9 1649.84  146.95
   0   4 -10   21.40    6.01
   0  -4  10   31.73    9.18
   0  -4 -10   21.81    8.68
   0   4  10   26.03    8.77
   0   4 -10   21.77    5.84
   0  -4  10   25.12    5.75
   0  -4  10   28.43   13.72
   0   4 -10    9.84   11.78
   0   4  10   23.86   14.71
   0   4 -10   10.92    5.28
   0  -4  10   14.67    5.47
   0  -4  11  174.10   30.88
   0   4 -11   77.27   23.01
   0   4  11  147.05   28.25
   0  -4 -11  123.70   21.91
   0   4  11  130.08   21.05
   0  -4  11  121.08   15.10
   0   4 -11  102.97   14.60
   0  -4  11  131.79   17.03
   0   4 -11  108.54   16.93
   0  -4  11  137.53   18.97
   0   4 -11  103.84   15.48
   0  -4  12   64.55   10.54
   0  -4  12   62.50   10.92
   0   4 -12   42.28    9.43
   0   4 -12   44.18    8.14
   0   4 -12   49.59    9.50
   0  -4  13   17.09    5.23
   0   4 -13   18.36    5.79
   0  -4  13   15.53    6.37
   0   4  13   14.15    5.11
   0   4 -13   19.94    5.70
   0  -4  14  120.42   14.64
   0   4 -14  106.96   13.75
   0  -4  14  133.95   14.51
   0  -4  14  110.27   13.21
   0   4 -15  460.30   34.11
   0   4 -15  374.96   33.15
   0  -4 -15  414.60   32.70
   0  -5   0   -0.65    1.96
   0   5   0    0.64    2.80
   0   5   0    1.08    2.82
   0  -5  -1 2000.74  179.23
   0  -5   1 2195.58  179.28
   0   5   1 1876.10  179.15
   0   5   1 2408.50  183.17
   0   5  -1 2338.44  186.33
   0   5   2  228.94   24.70
   0   5  -2  207.04   21.51
   0  -5   2  278.49   24.75
   0  -5  -2  242.45   22.04
   0   5   3    1.84    2.01
   0  -5  -3   -1.02    2.64
   0   5   3    2.21    6.20
   0  -5  -4  440.51   43.42
   0   5  -4  417.70   42.22
   0   5  -5 1559.84  146.63
   0  -5  -5 1698.16  148.22
   0   5   5 1957.17  161.93
   0   5  -6  438.53   47.49
   0   5   6  488.55   59.40
   0  -5  -6  432.70   48.16
   0   5  -7   17.93   10.52
   0   5  -7    5.02    4.71
   0   5   7    3.60    7.65
   0   5   7    3.83    3.53
   0  -5  -7    1.85    3.42
   0   5  -8  599.17   61.24
   0  -5  -8  776.79   70.86
   0   5   8  691.00   68.93
   0   5  -8  660.36   61.25
   0  -5   8  707.98   61.00
   0   5  -8  634.63   64.66
   0   5   8  804.22   81.84
   0   5  -8  634.98   67.30
   0   5  -8  586.72   70.40
   0   5  -9  116.45   15.69
   0  -5   9  142.82   15.99
   0   5   9  133.69   21.60
   0   5  -9  120.68   16.31
   0  -5   9  114.08   16.42
   0  -5   9  196.30   23.81
   0  -5  -9  178.80   25.03
   0   5  -9   65.82   25.42
   0   5  -9   82.17   18.88
   0   5  -9  114.93   20.41
   0  -5 -10  210.90   29.33
   0   5  10  182.73   27.22
   0  -5  10  217.08   21.65
   0   5 -10  137.91   20.13
   0   5 -10  139.64   34.12
   0  -5  10  159.27   34.00
   0   5 -10  177.20   21.92
   0  -5  10  253.18   28.02
   0  -5  10  198.66   22.98
   0  -5  11  174.08   20.77
   0  -5 -11  164.92   25.81
   0   5  11  164.91   24.92
   0   5 -11  126.89   27.00
   0  -5  11  186.26   19.27
   0   5 -11  130.53   18.07
   0   5 -11  153.05   21.01
   0   5 -11  144.53   19.51
   0   5  11  152.69   29.22
   0   5 -11  150.01   32.45
   0  -5  11  222.21   36.76
   0  -5  11  162.72   22.38
   0   5 -12  159.69   23.36
   0   5 -12  236.97   26.21
   0   5 -12  236.13   25.31
   0  -5  12  250.67   25.75
   0   5  12  222.83   24.12
   0  -5  12  250.81   26.18
   0  -5  12  216.43   25.90
   0   5 -12  224.90   23.76
   0  -5 -13  511.07   46.66
   0  -5  13  465.09   47.39
   0  -5  13  518.60   47.84
   0   5 -13  472.66   47.47
   0   5 -13  466.52   47.86
   0  -5  13  591.81   47.70
   0   5 -14   40.40    7.15
   0  -5  14   37.78    6.91
   0  -5  14   46.69    7.47
   0  -5 -14   48.17    6.48
   0  -5  14   49.14    7.00
   0   5 -15   27.93    4.47
   0   5 -15   32.12    5.02
   0   6   0 2728.22  231.70
   0   6   0 2690.64  228.39
   0  -6   0 2671.69  228.83
   0   6  -1 1262.62  111.80
   0   6   1 1338.78  108.83
   0   6   1 1092.47  105.91
   0  -6   1 1181.46  105.89
   0   6   1 1294.30  110.63
   0   6  -2  521.34   54.14
   0   6   2  480.97   50.30
   0  -6   2  539.06   46.36
   0   6   2  420.42   45.59
   0   6  -3 1312.90   98.45
   0   6   3 1190.81   91.67
   0  -6   3 1092.32   81.88
   0   6  -3  824.36   77.10
   0   6   3  774.17   77.69
   0   6   4 1008.61   97.91
   0   6  -4 1083.59  104.95
   0  -6   4  936.64   88.22
   0  -6  -5  313.98   36.51
   0   6   5  375.25   46.51
   0   6  -5  397.27   53.11
   0   6  -5  318.20   36.31
   0  -6  -6   -1.75    3.22
   0   6  -6   -3.60    7.63
   0   6  -6    1.65    2.48
   0   6   6    3.24    6.87
   0   6  -6    4.70    7.06
   0   6   7   29.06    9.75
   0  -6   7   36.83    6.84
   0   6  -7   26.98    6.58
   0   6   7   45.59   15.59
   0  -6  -7   31.81    9.83
   0   6  -7   26.56    6.49
   0   6  -7   59.12   11.43
   0   6  -7   36.73   14.00
   0   6  -7   45.00   10.89
   0   6  -8    3.01    5.30
   0  -6  -8    2.21    3.32
   0   6   8    6.60    6.18
   0   6  -8   -3.01    4.52
   0   6  -8    2.10    2.23
   0  -6   8    6.92    5.51
   0  -6   8    1.68    2.67
   0   6  -8    0.97    2.90
   0   6   8   -3.70    6.79
   0   6  -8    5.48   10.07
   0   6  -9 1025.08  110.83
   0   6   9  891.41   97.76
   0   6  -9 1059.02   85.16
   0  -6  -9  878.48   88.65
   0   6   9  799.07   86.95
   0   6  -9  768.09   90.14
   0   6  -9  816.69   87.25
   0   6  -9  682.62   87.36
   0  -6   9 1053.69   87.51
   0  -6   9  865.57   81.14
   0   6  -9  927.35   80.74
   0  -6   9  883.60   79.40
   0  -6  10   86.15   14.92
   0  -6 -10   65.45   15.07
   0   6  10   36.67   11.60
   0   6 -10   56.09   10.12
   0  -6  10   71.57   10.37
   0   6 -10   36.43   16.31
   0   6  10   59.48   17.83
   0  -6  10   65.28   20.93
   0   6 -10   43.38   10.78
   0   6 -10   52.99   10.17
   0  -6  10   64.53   11.13
   0  -6  11    8.33    4.27
   0   6 -11   12.60    5.50
   0  -6  11   16.81    7.30
   0  -6  11    8.02    4.84
   0   6 -11    8.80    4.11
   0  -6  11   15.02    4.86
   0  -6  11    8.78    4.59
   0  -6  12   26.70    6.94
   0  -6 -12   37.12    7.56
   0   6 -12   33.91    7.63
   0   6 -12   27.38    7.63
   0  -6  12   25.28    7.40
   0   6 -12   27.63    6.33
   0  -6  12   29.64    6.97
   0  -6  12   28.13    6.38
   0   6 -13   28.46    5.59
   0  -6  13   39.49    7.43
   0  -6 -13   33.65    6.40
   0  -6  13   33.13    6.40
   0   6 -13   38.13    7.27
   0   6 -13   37.29    7.50
   0   6 -14   14.36    4.12
   0  -6  14   22.47    4.52
   0  -6  14   16.87    3.74
   0   6 -15   57.61    6.68
   0   7   0    3.83    6.73
   0  -7   0    1.00    2.81
   0   7   0   -1.37    3.25
   0   7   1  752.23   73.64
   0  -7   1  783.19   71.10
   0   7   1  785.82   72.08
   0   7  -1  765.21   75.62
   0   7   1  781.79   71.46
   0   7   2   92.58   14.84
   0  -7   2  123.35   16.17
   0   7   2  111.26   17.59
   0   7   3  134.32   17.83
   0  -7   3  193.75   21.42
   0   7  -3  243.99   32.07
   0   7   3  188.67   25.85
   0  -7   4 1195.10  117.73
   0   7  -4 1391.71  132.51
   0   7   4 1262.31  125.01
   0  -7   5 1719.95  145.77
   0  -7   5 1566.66  141.32
   0   7  -5 1901.54  166.37
   0   7   5 1774.42  156.94
   0   7  -5 1424.45  147.01
   0  -7   5 1686.14  147.11
   0  -7   6   21.61    7.48
   0   7  -6   17.04    7.18
   0   7  -6   33.51   14.35
   0  -7   6   20.02    5.04
   0  -7   6   22.52    7.22
   0   7  -6   32.25   14.77
   0   7   6   15.77    9.63
   0   7  -6   17.40    5.89
   0  -7   6   27.53    5.93
   0   7  -7  264.64   29.43
   0  -7   7  221.23   29.91
   0   7   7  250.03   32.53
   0   7  -7  355.47   44.10
   0   7  -7  282.92   33.12
   0  -7   7  278.55   30.68
   0  -7   7  247.21   25.13
   0   7  -7  294.80   47.34
   0   7   7  304.14   41.01
   0   7  -7  194.71   24.15
   0   7  -7  218.69   25.69
   0  -7   7  243.50   25.29
   0   7  -7  193.14   25.09
   0  -7   8  660.58   67.54
   0   7   8  641.17   68.67
   0  -7   8  716.17   60.96
   0   7  -8  595.27   60.89
   0   7   8  726.70   78.47
   0   7  -8  729.94   65.10
   0  -7   8  678.92   60.68
   0   7  -8  537.13   66.54
   0   7  -8  687.26   75.41
   0   7  -8  613.76   61.51
   0  -7   9  123.06   19.24
   0   7   9   90.84   18.64
   0  -7   9   98.07   19.38
   0  -7   9  126.84   15.36
   0   7  -9  116.60   15.89
   0   7  -9   99.90   16.93
   0   7  -9  177.56   35.92
   0   7   9  116.56   24.95
   0   7  -9  115.49   22.73
   0   7  -9   90.18   19.30
   0   7  10  217.13   31.93
   0  -7  10  230.10   32.61
   0   7 -10  228.74   26.71
   0  -7  10  291.64   27.01
   0  -7  10  258.79   28.40
   0   7 -10  219.96   32.91
   0   7 -10  286.22   29.89
   0   7 -10  233.26   43.42
   0   7  10  196.68   35.83
   0  -7 -10  226.78   32.99
   0  -7  10  231.36   29.99
   0  -7  11   47.79    8.62
   0   7 -11   60.97   10.16
   0  -7  11   49.08   10.35
   0   7 -11   61.27   11.30
   0  -7  11   53.99   11.39
   0  -7  11   51.10    9.38
   0  -7 -12   55.16    9.48
   0   7 -12   65.57   10.89
   0   7 -12   59.77    9.86
   0  -7  12   69.53   11.10
   0   7 -12   73.42   11.64
   0  -7  12   94.06   11.52
   0  -7  12   89.04   12.89
   0   7 -12   58.80   10.99
   0  -7  13    0.77    2.32
   0   7 -13    7.43    3.53
   0  -7  13    1.88    2.20
   0  -7 -13   -0.56    2.47
   0   7 -13   -0.49    2.08
   0  -7  14  109.54   11.51
   0   7 -14  107.51   12.10
   0  -7  14  113.61   12.11
   0  -7 -14  103.32   11.11
   0  -8   0 1451.43  137.49
   0   8   0 1781.49  144.33
   0   8   0 1564.36  140.04
   0  -8   1  873.16   84.75
   0   8   1  983.43   87.86
   0   8  -1 1133.50   95.59
   0   8  -1  834.25   88.36
   0  -8   2   26.81    7.44
   0   8  -2   35.27   11.14
   0   8   2   26.96    8.25
   0   8  -2   22.49   11.41
   0   8   2   33.21    8.02
   0  -8   3  798.68   77.05
   0  -8   3  922.33   82.54
   0   8   3 1051.92   88.31
   0   8  -3 1023.75   93.85
   0  -8   4  307.12   32.04
   0  -8   4  283.42   28.99
   0  -8   4  304.38   34.01
   0   8   4  292.15   38.62
   0   8  -4  339.57   44.84
   0  -8   5   44.63    7.47
   0  -8   5   43.58   10.11
   0  -8   5   14.91    6.62
   0   8  -5   39.99   14.95
   0   8   5   27.62   10.51
   0  -8   5   41.50    7.00
   0  -8  -5   27.75    6.86
   0   8  -5   44.47   15.96
   0   8  -6 1417.03  105.04
   0  -8   6 1144.03  106.73
   0   8  -6 1014.46  106.93
   0   8  -6 1529.61  125.21
   0   8   6 1211.99  115.68
   0   8  -6 1262.60  125.20
   0  -8   6 1247.00  104.60
   0  -8   6 1040.81   99.45
   0   8  -6 1060.74  100.96
   0  -8  -6 1091.44  100.57
   0  -8   6 1141.78  100.50
   0   8  -6 1069.79  101.32
   0  -8  -7   19.41    5.95
   0   8  -7   23.74    6.43
   0  -8   7   23.57    7.98
   0   8  -7   24.69    7.45
   0   8   7   11.54    7.10
   0  -8   7   12.25    6.33
   0   8  -7   23.26    9.37
   0   8  -7   14.54   11.02
   0   8   7   29.92   12.81
   0   8  -7   29.63   15.79
   0  -8   7   18.18    5.43
   0   8  -7   15.89    5.20
   0  -8   7   22.46    5.75
   0   8  -7   18.14    5.73
   0  -8  -8   78.85   13.28
   0   8  -8   78.49   13.71
   0  -8   8   93.24   16.89
   0   8  -8  138.86   17.68
   0  -8   8  105.01   18.75
   0   8   8   74.86   17.17
   0   8  -8  101.47   22.62
   0   8  -8   98.36   19.16
   0   8  -8  118.70   28.99
   0   8   8  103.88   23.09
   0  -8   8   91.39   13.33
   0   8  -8  112.07   13.79
   0   8  -8  105.46   14.81
   0  -8   8   78.17   12.79
   0  -8  -9   42.59    8.60
   0   8  -9   36.34    8.65
   0   8  -9   41.79    9.48
   0  -8   9   42.91   11.52
   0   8   9   45.89   12.18
   0  -8   9   37.47    9.83
   0   8  -9   29.88    7.82
   0  -8   9   52.77    8.97
   0  -8   9   46.08    8.75
   0   8   9   58.53   16.70
   0  -8   9   59.15   19.17
   0   8  -9   40.31   11.86
   0   8  -9   47.80   15.27
   0  -8  10   90.16   14.13
   0   8 -10   70.87   12.32
   0  -8  10   80.08   11.99
   0  -8  10   92.19   15.79
   0   8 -10   82.73   13.19
   0   8 -10  101.63   14.65
   0  -8  11   31.80    8.71
   0  -8  11   28.88    7.52
   0   8 -11   37.94    7.83
   0  -8  11   29.62    6.31
   0   8 -11   28.74    7.25
   0   8 -12   22.39    5.72
   0  -8  12   30.16    6.68
   0   8 -12   30.25    6.69
   0   8 -12   26.49    7.21
   0  -8  12   28.46    5.97
   0  -8  13   25.02    5.37
   0   8 -13   23.03    5.39
   0  -8 -13   34.11    5.57
   0   8 -13   38.09    5.29
   0  -8  13   32.39    5.57
   0  -8 -14  333.32   30.57
   0   8 -14  397.72   31.70
   0  -8  14  309.76   31.08
   0   8 -14  389.91   31.60
   0   9   0    1.67    3.55
   0  -9   0    3.01    3.37
   0   9   0    5.98    5.99
   0  -9   1   10.03    4.91
   0   9   1   17.84    7.16
   0   9  -1   11.93    8.06
   0  -9  -1   11.14    4.29
   0  -9   1   15.27    5.52
   0   9  -1    8.21    5.85
   0   9  -2   42.29    6.55
   0  -9   2   38.88    9.20
   0   9  -2   24.88   10.98
   0  -9   2   36.20    7.33
   0  -9  -2   37.30    7.46
   0   9   2   33.23    6.41
   0   9   2   33.49    8.63
   0   9  -2   38.85   13.18
   0  -9   3   39.90    9.55
   0  -9  -3   33.52    6.66
   0  -9   3   17.52    5.92
   0   9  -3   26.65   11.12
   0   9   3   15.83    7.62
   0  -9   3   34.54    6.36
   0   9  -3   34.51   12.22
   0   9   3   28.69    5.85
   0   9  -4  684.82   77.77
   0   9   4  708.60   71.91
   0  -9   4  724.57   67.83
   0  -9   4  609.66   62.89
   0  -9   4  685.08   61.41
   0  -9   4  630.02   61.76
   0   9  -4  721.95   63.78
   0  -9  -4  690.72   62.14
   0  -9   5   11.22    4.56
   0  -9   5    3.74    3.45
   0  -9   5    5.07    4.67
   0   9   5    5.42    5.76
   0   9  -5    3.98    7.33
   0  -9   5    4.25    3.01
   0  -9  -5    1.91    2.90
   0   9  -5    7.25    7.70
   0   9  -6  124.05   17.07
   0  -9   6  139.25   21.49
   0   9  -6  165.73   30.04
   0   9   6  146.94   26.19
   0   9  -6  124.04   28.56
   0  -9   6  132.70   18.79
   0  -9   6  130.55   16.17
   0   9  -6  123.41   16.81
   0  -9  -6  122.08   16.40
   0  -9   6  107.38   15.68
   0  -9  -7  123.86   16.76
   0   9  -7  135.58   17.88
   0  -9   7   99.58   17.85
   0   9  -7  132.66   17.79
   0  -9   7  133.12   21.87
   0   9  -7  130.31   22.92
   0   9  -7  147.47   28.53
   0   9  -7  128.11   30.01
   0   9   7  153.26   27.11
   0  -9   7  147.87   17.14
   0   9  -7  127.55   16.85
   0  -9   7  130.00   16.78
   0   9  -7  122.79   17.54
   0  -9  -8    7.27    4.21
   0   9  -8    9.54    4.98
   0  -9   8   18.99    8.10
   0  -9   8   13.72    6.73
   0   9  -8    7.27    4.72
   0   9   8    4.59    5.51
   0  -9   8   11.07    6.28
   0  -9   8    8.97    4.05
   0  -9   8    9.56   10.18
   0   9  -8    9.73   12.67
   0   9   8    6.51    6.96
   0  -9   8   20.86    5.84
   0   9  -8   11.97    5.46
   0   9  -8   12.31    4.79
   0   9  -8   17.90    8.18
   0   9  -8   13.32    8.70
   0  -9   9   91.71   15.24
   0  -9   9  112.49   14.50
   0   9  -9  103.83   15.24
   0  -9  -9   90.99   14.21
   0   9  -9  109.52   15.54
   0  -9   9  120.00   14.99
   0  -9   9  124.89   18.33
   0   9  -9  101.25   15.02
   0  -9  10 1559.99  137.86
   0   9 -10 1801.85  140.25
   0  -9  10 1539.87  139.98
   0   9 -10 1573.52  139.43
   0  -9  10 1590.86  138.46
   0   9 -10 1627.47  139.44
   0  -9 -10 1514.73  138.01
   0  -9  11  150.84   15.74
   0   9 -11  126.44   16.14
   0   9 -11  131.39   16.35
   0  -9 -11  127.20   15.53
   0   9 -11  121.51   15.82
   0  -9  11  123.98   16.59
   0   9 -11  131.13   17.53
   0  -9  11  125.92   17.59
   0   9 -12   96.90   11.92
   0   9 -12   92.14   12.53
   0  -9  12   72.79   11.57
   0   9 -12  103.70   11.94
   0  -9  13   49.34    7.35
   0   9 -13   58.21    6.44
   0  10   0  267.48   35.45
   0 -10   0  264.03   30.26
   0  10   0  307.05   28.35
   0  10  -1   26.38    9.97
   0  10   1   25.38    8.36
   0  10  -1   15.05    4.54
   0  10   1   17.52    4.76
   0 -10  -1   23.99    5.57
   0 -10   1   17.57    6.27
   0 -10  -1   13.16    5.26
   0 -10   2  566.10   61.50
   0  10   2  693.95   57.14
   0 -10  -2  583.54   56.85
   0  10  -2  643.77   68.35
   0  10  -2  627.73   56.00
   0  10  -2  640.12   69.34
   0 -10  -2  565.05   57.25
   0 -10   2  640.78   59.95
   0 -10   3   39.39   10.37
   0  10   3   55.65    8.42
   0  10  -3   42.66   13.83
   0 -10  -3   35.66    7.70
   0 -10   3   42.40   10.00
   0 -10   3   41.36    8.62
   0  10  -3   47.56    7.65
   0  10  -3   39.92   13.93
   0 -10  -3   51.38    8.87
   0 -10   4   28.43    7.29
   0  10  -4   29.29    5.75
   0 -10   4   22.84    8.14
   0  10  -4   13.97    8.13
   0  10  -4   38.45   14.06
   0  10  -4   31.23    7.80
   0 -10   4   24.81    6.54
   0 -10  -4   33.35    7.29
   0 -10   5  104.91   19.41
   0 -10  -5  127.60   16.59
   0  10  -5  131.90   16.91
   0  10  -5  125.40   26.99
   0 -10   5  131.48   16.15
   0 -10   5  113.73   17.18
   0 -10   5  112.77   18.52
   0  10  -5  137.65   17.78
   0 -10   5  126.39   16.54
   0 -10   6  623.73   64.29
   0 -10   6  753.42   62.43
   0 -10   6  628.94   67.74
   0 -10  -6  637.48   61.09
   0  10  -6  693.38   62.19
   0  10  -6  629.90   78.97
   0  10   6  713.73   73.48
   0 -10   6  568.90   62.28
   0 -10   6  648.84   60.88
   0  10  -6  624.23   61.62
   0  10  -6  822.61   80.73
   0 -10  -7   36.86    8.29
   0  10  -7   43.24    9.15
   0 -10   7   36.92    9.81
   0 -10   7   44.59   10.31
   0  10  -7   31.39    7.66
   0  10   7   43.21   11.79
   0 -10   7   54.00   13.18
   0 -10   7   36.59    8.06
   0 -10   7   38.13   15.92
   0  10   7   32.44   12.56
   0  10  -7   35.54   15.98
   0  10  -7   48.68    9.71
   0 -10   7   38.95    8.23
   0  10  -7   43.29    8.73
   0  10  -7   57.93   17.65
   0  10  -8  238.84   28.03
   0 -10   8  248.32   28.01
   0 -10   8  270.34   31.27
   0  10  -8  261.09   29.34
   0 -10   8  265.04   31.06
   0 -10  -8  290.52   29.13
   0  10  -8  309.12   29.34
   0 -10   8  300.36   29.18
   0  10  -8  246.50   29.28
   0  10  -9  200.21   23.85
   0 -10   9  228.41   24.66
   0  10  -9  243.45   25.66
   0 -10  -9  232.50   24.84
   0  10  -9  238.70   23.96
   0 -10   9  201.20   25.18
   0 -10   9  256.97   28.06
   0 -10   9  192.72   23.54
   0  10  -9  254.71   26.24
   0 -10 -10   38.69    7.35
   0  10 -10   35.03    7.31
   0 -10  10   31.78    6.65
   0 -10  10   32.98    8.18
   0  10 -10   25.50    6.69
   0 -10  10   36.77    6.85
   0  10 -11    4.45    3.16
   0 -10 -11    7.34    3.57
   0  10 -11    2.95    3.34
   0 -10  11    1.76    2.51
   0 -10  11    4.28    3.41
   0 -10  12    3.05    2.51
   0 -10 -12    4.26    2.44
   0  10 -12    2.61    2.16
   0  10 -12    4.23    2.40
   0  10 -12    0.58    2.57
   0 -10  13   16.06    2.82
   0 -11   0   -1.15    3.84
   0  11   0    4.11    5.77
   0 -11   1  329.45   34.99
   0 -11  -1  315.49   33.82
   0  11   1  361.83   33.19
   0 -11  -1  313.90   32.62
   0  11  -1  293.04   40.08
   0  11  -2    0.70    1.83
   0  11  -2    2.69    5.70
   0  11   2    4.07    3.12
   0 -11   2    5.23    4.39
   0 -11  -2   -1.00    2.82
   0 -11  -2    4.47    3.42
   0  11  -2   -1.06    2.53
   0 -11   3   13.43    6.92
   0  11  -3    5.92    7.19
   0  11  -3   18.97    4.82
   0  11  -3   19.26    8.22
   0  11   3   21.43    5.28
   0 -11   3   20.81    7.51
   0 -11  -3   23.43    5.99
   0  11  -3   14.56    5.77
   0  11  -3   33.37   12.14
   0 -11   4   55.74   12.79
   0  11  -4   49.86   13.99
   0  11  -4   63.30   17.08
   0  11  -4   47.79   15.62
   0 -11  -4   59.33   10.09
   0 -11   4   59.21   10.26
   0  11  -4   53.56   10.24
   0  11  -4   52.86    8.58
   0  11  -5  434.05   39.71
   0 -11   5  449.55   48.25
   0  11  -5  402.34   49.77
   0  11  -5  423.09   41.17
   0  11  -5  406.94   55.16
   0 -11   5  403.11   41.23
   0  11  -5  436.58   42.63
   0 -11  -5  455.83   41.67
   0 -11   5  369.80   43.06
   0 -11   5  352.26   41.35
   0  11  -6  202.01   24.37
   0  11  -6  270.38   34.32
   0  11  -6  198.03   33.62
   0 -11  -6  220.84   24.36
   0  11  -6  218.28   25.26
   0 -11   6  192.11   23.63
   0  11  -6  221.74   22.91
   0  11  -6  218.56   24.36
   0 -11   6  221.41   26.91
   0 -11   6  197.42   25.20
   0  11  -7   40.91    8.42
   0 -11  -7   47.78    8.69
   0 -11   7   29.49    7.51
   0  11  -7   43.49    7.22
   0  11  -7   31.70    7.69
   0 -11   7   32.24    8.99
   0 -11   7   38.81    9.70
   0  11  -8    2.62    3.34
   0 -11  -8    1.77    4.19
   0 -11   8   -1.78    3.14
   0  11  -8    1.08    3.61
   0  11  -8    4.81    2.82
   0  11  -8    0.97    2.72
   0 -11   8    6.03    4.61
   0 -11  -9   68.68    9.99
   0  11  -9   58.26   10.07
   0 -11   9   58.97    9.35
   0  11  -9   54.06    8.18
   0  11  -9   63.02    9.92
   0  11  -9   71.31   11.60
   0 -11 -10  824.25   70.67
   0  11 -10  709.38   71.05
   0 -11  10  785.98   70.34
   0  11 -10  799.02   71.11
   0  11 -10  910.50   73.11
   0  11 -11   -0.57    2.00
   0 -11  11    0.86    1.70
   0  11 -11    1.56    2.13
   0 -11 -11    2.30    2.44
   0  11 -12   44.41    5.41
   0 -11  12   35.58    5.64
   0 -12   0   60.05   10.56
   0  12   0   65.19    9.64
   0  12   0   39.19    8.16
   0  12  -1  522.39   62.06
   0  12  -1  572.35   54.79
   0  12   1  556.65   54.34
   0 -12   1  597.27   56.73
   0 -12  -1  608.67   55.86
   0  12   1  618.88   54.39
   0  12  -2   67.49   16.54
   0  12  -2  104.33   20.37
   0  12  -2   99.97   13.82
   0 -12  -2   93.19   12.89
   0 -12  -2   85.19   13.11
   0 -12   2   88.92   14.72
   0  12   2   99.46   12.58
   0  12  -3  479.90   52.89
   0  12  -3  474.96   54.85
   0 -12  -3  400.54   42.40
   0 -12   3  460.19   45.87
   0 -12   3  441.85   43.85
   0  12  -3  464.58   44.16
   0  12  -4    2.50    3.76
   0  12  -4   -1.09    3.06
   0 -12   4    1.05    3.35
   0 -12  -4    7.39    3.93
   0  12  -4    2.56    2.56
   0 -12   4    5.49    5.04
   0  12  -4    0.98    3.45
   0  12  -5   -1.13    4.16
   0 -12   5    5.12    3.44
   0  12  -5    3.29    3.50
   0 -12  -5    8.29    4.27
   0  12  -5    0.87    2.63
   0  12  -5   10.53    4.87
   0  12  -6  278.27   33.43
   0 -12   6  355.81   34.17
   0  12  -6  308.57   34.05
   0 -12  -6  378.19   34.27
   0  12  -6  329.64   33.37
   0 -12   6  349.00   36.32
   0  12  -6  346.92   35.04
   0  12  -7   84.14   11.74
   0 -12  -7   68.60   10.56
   0  12  -7   67.92   11.75
   0 -12   7   77.43   12.65
   0 -12   7   67.99   10.75
   0 -12   8   62.27    9.24
   0 -12  -8   61.35    9.26
   0  12  -8   49.21    8.49
   0  12  -8   70.45    9.77
   0 -12   8   49.31    9.73
   0 -12   8   54.36    9.80
   0  12  -8   77.42   11.58
   0 -12  -9  542.63   45.68
   0 -12   9  442.85   46.35
   0  12  -9  478.87   46.25
   0 -12   9  513.93   45.43
   0  12  -9  496.04   46.74
   0 -12 -10   20.82    4.33
   0 -12  10   28.46    5.60
   0 -12  10   19.49    4.00
   0  12 -10   20.05    4.85
   0  12 -10   31.96    5.87
   0  12 -11   32.24    5.05
   0 -12 -11   28.09    4.13
   0  12 -11   33.83    4.78
   0  13   0   -0.81    2.45
   0 -13   0   -2.17    3.46
   0 -13  -1  522.00   47.90
   0 -13   1  464.51   47.91
   0  13  -1  550.77   47.11
   0  13   1  468.72   45.64
   0  13  -1  466.48   45.98
   0 -13  -2   16.63    4.86
   0 -13   2   19.07    6.46
   0  13   2   12.28    4.36
   0  13  -2   17.52    5.09
   0 -13   2   16.22    5.32
   0 -13  -3   29.80    6.41
   0 -13   3   30.38    8.23
   0  13   3   32.74    6.86
   0 -13   3   42.90    8.34
   0  13  -3   37.72    7.83
   0  13  -4   54.44   10.59
   0 -13   4   56.74    9.87
   0  13  -4   62.76   10.17
   0 -13   4   52.01   10.78
   0 -13  -4   58.33    9.16
   0  13  -5 1041.27  106.52
   0  13  -5 1166.36  106.76
   0 -13   5 1225.43  106.88
   0  13  -5 1267.53  106.55
   0 -13  -5 1367.80  106.56
   0  13  -6    4.44    3.78
   0 -13   6    5.70    3.12
   0  13  -6    2.64    3.74
   0 -13   6    2.14    3.41
   0  13  -6    0.82    3.01
   0 -13  -6    0.72    2.95
   0  13  -7   87.95   12.25
   0 -13  -7  101.95   12.05
   0 -13   7   83.32   11.63
   0  13  -7   99.04   12.74
   0  13  -7   92.75   12.32
   0 -13   7   87.23   12.81
   0 -13  -8    3.18    2.76
   0 -13   8    1.51    2.40
   0 -13   8    0.56    2.07
   0  13  -8    0.67    3.17
   0 -13   8    1.42    2.81
   0 -13  -9   33.17    5.38
   0 -13   9   34.04    6.17
   0 -13   9   36.09    5.32
   0  13  -9   46.17    6.65
   0  13 -10    7.51    2.44
   0 -13  10    5.19    1.88
   0 -13 -10    7.92    1.85
   0  14   0    1.28    2.04
   0 -14   0    0.94    2.98
   0  14  -1  508.61   47.09
   0 -14   1  517.32   49.07
   0  14  -2  105.68   13.46
   0 -14   2  105.35   14.97
   0 -14   2  115.62   14.74
   0  14  -3  411.99   38.15
   0  14  -3  327.39   38.47
   0  14  -3  436.01   38.56
   0 -14   3  424.61   39.24
   0 -14   3  413.88   40.31
   0  14  -4    2.16    2.42
   0 -14   4    3.93    2.89
   0 -14   4   -0.98    3.13
   0  14  -4    1.76    3.62
   0  14  -5   86.68   12.01
   0 -14  -5   90.64   10.61
   0 -14   5   81.77   11.16
   0  14   5   83.81   10.13
   0  14  -5   75.36   10.80
   0  14  -6   66.96    9.47
   0 -14  -6   65.56    8.34
   0  14  -6   59.72    8.96
   0 -14   6   63.02    8.75
   0  14   6   55.38    7.49
   0 -14   6   61.65    9.56
   0  14  -7   29.11    4.88
   0  14  -7   19.79    3.76
   0  14  -7   26.54    4.90
   0 -14   7   31.79    4.71
   0 -14   7   27.51    5.30
   0  14  -7   21.01    4.21
   0 -14  -7   22.44    3.82
   0 -14  -8    8.13    2.13
   0  14  -8    4.84    2.41
   0 -14   8    8.61    2.30
   0  15   0    0.69    2.65
   0 -15   0   -0.70    2.67
   0  15   1  220.50   23.31
   0  15  -1  215.77   23.81
   0 -15   1  266.44   24.41
   0  15  -2    4.50    2.27
   0  15  -2    3.80    3.96
   0 -15   2    3.33    2.85
   0  15  -3    4.21    3.16
   0  15  -3    0.46    1.53
   0 -15   3    0.76    2.80
   0 -15   3    0.62    2.09
   0  15  -4   39.94    6.64
   0  15  -4   21.07    4.24
   0 -15   4   34.38    6.41
   0 -15   4   28.79    5.27
   0 -15   5  280.93   18.98
   0  15  -5  327.65   20.56
   0 -15   6   63.94    7.28
   0  15  -6   47.62    6.50
   0  15  -6   74.16    8.07
   0 -15   7    1.26    0.95
   0  16   0   96.79   10.72
   0 -16   0   81.94   10.15
   0  16  -1    4.21    2.63
   0  16  -1   -0.36    2.93
   0  16   1   -2.35    3.56
   0 -16   1    0.89    1.63
   0 -16  -1   -0.45    1.71
   0  16  -2  167.68   17.00
   0  16   2  179.46   17.33
   0 -16  -2  156.83   16.36
   0 -16   2  161.13   16.44
   0  16   3   -1.27    4.15
   0 -16   3    6.12    1.95
   0 -16  -3   -0.37    1.43
   0  16  -4    0.37    1.67
   0 -16  -4   -0.31    1.17
   0 -16   4    0.28    1.03
   0 -16  -5   47.06    5.26
  -1   0  16   -1.25    1.41
   1   0 -16   -1.14    1.97
  -1   0  15  113.31   14.11
  -1   0  14   -3.09    4.52
   1   0 -13   35.93    6.74
  -1   0  13   44.62    9.97
  -1   0  13   47.01    8.70
   1   0 -13   25.15    6.08
  -1   0  12    1.15    3.21
   1   0 -12   -0.87    2.45
   1   0 -12    2.39    2.53
   1   0 -12   -0.86    2.90
  -1   0  11 1445.05  134.71
  -1   0  11 1175.14  140.51
   1   0 -11 1448.03  128.06
  -1   0  11 1739.11  131.12
   1   0 -11 1667.39  139.27
   1   0 -11 1368.97  127.80
   1   0 -10    4.07    2.86
  -1   0  10    5.30    5.62
  -1   0  10    7.11    8.43
   1   0 -10   -2.62    2.92
  -1   0  10   -1.06    2.52
   1   0 -10   -2.11    3.16
   1   0  -9  888.97   77.91
  -1   0   9  816.53   81.47
  -1   0   8    3.66    7.77
  -1   0   8    2.26    4.15
  -1   0   7 1737.50  168.32
  -1   0   7 1748.95  158.36
  -1   0   6   -3.33    9.36
  -1   0   6   -1.79    5.36
  -1   0   6    2.86    2.68
  -1   0   5  707.81   66.50
  -1   0   5  592.90   71.76
  -1   0   5  680.14   60.95
   1   0  -4   -0.53    1.58
  -1   0   4    1.25    5.15
  -1   0   4    1.95    8.01
  -1   0   4    3.58    2.29
   1   0  -3  139.43   13.62
  -1   0   3  133.65   17.63
  -1   0   3  134.21   16.92
  -1   0   3  132.44   14.04
   1   0  -2    0.20    0.92
  -1   0   2    1.95    3.01
  -1   0   2   -0.53    2.73
  -1   0   2    1.29    1.37
  -1   0   1  232.24   21.08
  -1   0   1  216.18   21.01
  -1   0   1  219.64   20.89
  -1   0   0    3.09    1.08
  -1   0   0    0.70    1.94
  -1   0   0    0.31    1.49
  -1   0   0   -0.68    2.01
  -1   0  -1   10.59    3.25
  -1   0  -1    8.32    3.31
  -1   0  -1   13.43    3.28
  -1   0  -1   12.64    2.72
  -1   0  -2    0.36    2.58
  -1   0  -2   -0.73    2.91
  -1   0  -2    2.09    2.71
  -1   0  -3 2902.29  257.96
  -1   0  -3 2984.29  263.01
  -1   0  -3 3282.06  257.88
  -1   0  -4   -1.66    6.10
  -1   0  -4    4.05    3.52
  -1   0  -4    0.74    1.97
   1   0   4    1.60    1.96
  -1   0  -5    8.02    7.37
  -1   0  -5    4.08    3.10
  -1   0  -5    1.25    1.70
   1   0   5    1.32    1.98
  -1   0  -6    6.48    6.87
  -1   0  -6    1.93    3.42
   1   0   6    1.61    1.71
  -1   0  -7 1723.67  177.35
   1   0   7 2127.80  171.59
  -1   0  -8    2.08    3.13
   1   0   8    4.51    3.39
  -1   0  -9  156.44   20.15
   1   0   9  222.63   29.93
  -1   0  -9  207.07   27.58
  -1   0  -9  180.41   20.50
  -1   0 -10   -0.99    2.78
   1   0  10    1.88    2.64
  -1   0 -10    2.33    3.50
  -1   0 -10   -0.99    2.77
  -1   0 -11  239.67   27.82
   1   0  11  283.64   28.46
  -1   0 -11  331.73   50.12
  -1   0 -11  233.18   34.29
   1   0  11  220.50   39.31
  -1   0 -11  287.90   28.88
  -1   0 -12    1.96    3.12
  -1   0 -13  886.44   76.19
  -1   0 -13  815.05   75.96
  -1   0 -14   -2.49    3.74
  -1   0 -14   -0.55    2.42
  -1   0 -15  644.68   54.21
   1   0  15  574.63   54.00
  -1  -1  16    2.45    1.88
   1  -1 -16    2.09    1.86
  -1   1  16    2.93    2.17
  -1  -1  16    1.18    1.87
  -1  -1  15  607.63   50.00
   1   1 -15  504.28   46.99
  -1  -1  14  131.07   17.55
  -1  -1  14  166.99   17.47
   1   1 -14  117.06   14.58
   1   1 -13  857.07   77.12
  -1  -1  13  947.02   79.45
  -1  -1  13  955.77   81.69
   1   1 -13  768.93   76.82
  -1   1  12   29.54    6.95
  -1  -1  12   19.58    6.01
  -1   1  12    6.59    6.20
   1   1 -12   13.68    4.73
   1  -1 -12   18.58    4.83
   1   1 -12   13.52    5.09
   1  -1 -12   11.76    6.73
   1   1 -12   19.25    8.18
  -1   1  11   73.25   11.45
  -1  -1  11   59.56   10.44
   1   1 -11   52.11    9.24
   1  -1 -11   78.85   15.83
   1   1 -11   60.76   13.88
   1  -1 -11   51.51    8.71
   1   1 -11   41.15    8.78
  -1  -1  11   36.45   13.66
  -1   1  11   85.37   21.32
  -1   1  10   67.07   21.13
  -1  -1  10   82.45   19.57
  -1  -1  10  119.60   22.89
   1   1 -10   97.17   12.93
   1  -1 -10  108.28   18.58
   1   1 -10   88.30   13.14
  -1   1  10  123.42   15.20
  -1  -1  10   82.85   13.24
  -1  -1  10   86.95   15.61
   1  -1  -9  525.07   53.67
  -1   1   9  422.33   62.58
  -1  -1   9  495.36   60.18
  -1   1   9  455.33   54.44
  -1  -1   9  565.55   61.05
  -1  -1   9  535.86   51.99
   1  -1  -8   84.00   14.31
  -1  -1   8   82.16   18.77
  -1   1   8   73.45   21.80
  -1  -1   8   79.86   19.21
  -1   1   8   64.73   14.74
  -1   1   8   93.25   14.91
  -1   1   7 1717.61  152.35
  -1   1   7 1528.11  164.53
  -1  -1   7 1842.06  158.44
  -1  -1   7 1692.94  159.09
  -1   1   7 1666.06  149.10
   1   1  -6  413.12   44.52
  -1   1   6  463.75   61.58
  -1   1   6  531.71   49.49
  -1  -1   6  429.82   53.53
  -1  -1   6  585.64   55.84
  -1   1   6  487.07   46.13
   1   1  -5   67.98    9.83
  -1   1   5   70.17   19.67
  -1  -1   5   67.55   15.77
  -1  -1   5  104.07   18.23
  -1   1   5   58.89   11.83
  -1   1   5   78.31   10.99
   1   1  -4   15.23    3.77
  -1  -1   4   15.41    6.96
  -1  -1   4   16.08    7.34
  -1   1   4   22.38   11.89
  -1   1   4   21.58    5.98
  -1   1   4   22.69    5.22
   1   1  -3 1684.69  136.60
  -1   1   3 1623.63  139.01
  -1  -1   3 1458.29  137.72
  -1  -1   3 1817.94  144.02
  -1   1   3 1591.14  137.41
  -1   1   2  163.43   15.44
  -1  -1   2  137.51   14.79
  -1  -1   2  171.50   15.32
  -1  -1   1  274.05   26.42
  -1  -1   1  302.31   25.76
  -1   1   1  284.06   25.46
  -1  -1   1  275.85   25.39
  -1   1   1  284.62   26.87
  -1  -1   1  313.06   26.45
  -1  -1   0  147.43   13.75
  -1   1   0  166.47   15.69
  -1   1   0  129.99   12.39
  -1  -1   0  133.71   13.94
  -1  -1   0  153.17   13.80
  -1   1  -1    5.73    1.80
  -1   1  -1    6.39    3.24
  -1  -1  -1    3.16    2.88
  -1   1  -2 1232.92  114.05
  -1   1  -2 1283.74  113.06
  -1   1  -2 1344.06  118.70
  -1  -1  -2 1243.79  112.81
  -1  -1  -2 1367.01  114.02
   1  -1   2 1391.25  111.23
  -1   1  -3   79.22   10.48
  -1   1  -3   74.03   15.69
  -1  -1  -3   59.50    9.15
   1  -1   3   78.65    7.83
  -1   1  -4  117.50   14.21
  -1   1  -4  103.72   22.90
  -1  -1  -4  110.57   14.59
  -1  -1  -4  107.32   14.21
   1  -1   4  127.52   12.40
  -1   1  -5  297.51   29.67
   1  -1   5  340.91   28.69
  -1  -1  -5  252.26   29.60
  -1   1  -5  352.69   44.77
  -1  -1  -5  275.88   31.21
  -1   1  -6 1166.10  114.32
  -1  -1  -6  936.96   99.89
  -1  -1  -6  979.95   98.47
   1  -1   6 1267.31   98.06
   1   1   6 1337.65  100.79
  -1  -1  -6 1071.13  101.21
  -1   1  -7 1289.82  129.02
  -1  -1  -7 1163.81  116.23
  -1  -1  -7 1188.85  114.56
   1   1   7 1563.08  117.51
  -1  -1  -7 1442.69  119.77
  -1   1  -8    3.03    5.60
  -1  -1  -8   10.95    5.84
   1   1   8   16.93    5.73
  -1   1  -9  502.86   46.61
   1   1   9  525.43   50.94
  -1  -1  -9  441.78   46.14
  -1   1  -9  499.95   48.17
   1  -1   9  522.33   47.41
  -1   1  -9  376.13   54.39
  -1  -1  -9  513.61   54.43
  -1   1  -9  528.20   47.53
  -1  -1  -9  506.13   47.25
  -1   1 -10   40.70    8.79
  -1  -1 -10   45.68    8.38
   1  -1  10   68.66   10.13
   1  -1  10   65.12   16.11
  -1  -1 -10   68.34   14.91
  -1  -1 -10   55.38    9.51
  -1   1 -10   33.39    7.81
  -1  -1 -11 1414.93  123.57
  -1   1 -11 1271.56  123.27
   1  -1  11 1487.54  123.86
  -1  -1 -11 1556.18  134.71
  -1   1 -11 1331.25  123.75
   1   1  11 1367.86  142.00
  -1   1 -12   -1.01    3.56
  -1  -1 -12    0.94    2.65
   1  -1  12    0.90    2.53
  -1  -1 -12   -0.88    3.38
  -1   1 -13   13.00    4.78
   1  -1  13   17.50    4.52
  -1  -1 -13   16.33    4.64
  -1  -1 -14    7.09    4.10
  -1  -1 -14    3.55    2.28
  -1   1 -14    2.50    2.59
   1  -1  15  107.48   11.92
  -1   1 -15   83.10    9.91
   1   2 -16   13.99    2.93
   1  -2 -16   13.71    2.85
  -1  -2  15   48.02    7.63
  -1   2  15   37.20    6.40
   1   2 -14    0.65    2.28
  -1  -2  14    4.28    3.40
   1   2 -14    2.12    2.49
  -1  -2  14    2.04    4.85
  -1   2  14   -2.67    4.62
   1   2 -13   37.45    7.72
  -1  -2  13   53.92    9.82
   1   2 -13   46.86    8.58
  -1  -2  13   56.64   11.14
  -1   2  13   46.75   10.05
   1   2 -12   93.46   12.96
  -1  -2  12   96.39   14.01
  -1   2  12  119.26   24.11
  -1  -2  12   76.64   19.41
   1   2 -12   80.24   12.92
  -1   2  12   96.44   17.50
   1  -2 -12   92.34   17.87
   1   2 -12   77.68   17.15
   1   2 -11  966.79  117.47
  -1  -2  11 1096.20  117.12
  -1   2  11  972.61  118.19
   1   2 -11 1035.36  102.72
  -1   2  11 1419.99  105.51
  -1  -2  11 1233.95  104.41
   1   2 -11 1103.76  102.34
   1   2 -11 1315.62  113.61
   1  -2 -11 1177.72  111.52
   1  -2 -10  118.24   20.05
  -1  -2  10  103.41   16.77
  -1  -2  10  117.78   14.24
  -1  -2  10  135.63   25.98
  -1   2  10  107.78   25.31
  -1  -2  10   98.66   15.70
  -1  -2  10  120.42   15.61
  -1   2  10  121.23   16.07
   1   2 -10   96.59   13.76
   1   2 -10   90.07   14.49
  -1  -2   9  126.81   15.43
   1  -2  -9   94.83   17.85
   1   2  -9  107.07   15.18
  -1  -2   9  141.45   26.39
  -1  -2   9  105.87   20.13
  -1   2   9  156.90   30.95
  -1  -2   9  103.14   16.95
  -1   2   9  108.90   18.70
  -1  -2   9  117.35   17.11
   1   2  -8    4.34    3.08
  -1  -2   8    1.25    2.66
  -1   2   8    8.22    4.94
   1  -2  -8    1.61    3.43
  -1  -2   8    2.10    4.45
  -1   2   8   -4.23    8.98
  -1  -2   8   -3.14    6.67
   1   2  -7  420.85   43.90
  -1  -2   7  451.41   43.52
  -1   2   7  480.57   46.41
   1  -2  -7  407.80   44.50
  -1  -2   7  388.64   47.44
  -1  -2   7  468.59   55.27
  -1   2   7  610.71   67.20
   1   2  -6 2794.57  224.47
  -1   2   6 2508.95  225.29
  -1  -2   6 2530.31  223.22
   1  -2  -6 2740.68  225.04
  -1  -2   6 2323.70  226.87
   1   2  -5   -0.78    1.84
  -1   2   5    1.02    2.66
  -1  -2   5   -0.72    1.71
   1  -2  -5    1.71    2.72
  -1  -2   5    3.28    4.92
   1   2  -4  694.27   59.03
  -1  -2   4  672.08   58.81
  -1   2   4  669.81   60.58
   1  -2  -4  680.48   59.26
  -1  -2   4  593.92   58.63
   1   2  -3  516.02   47.43
  -1   2   3  589.30   56.77
  -1  -2   3  536.38   46.60
   1  -2  -3  556.54   47.73
  -1   2   3  489.77   47.00
  -1  -2   3  581.71   47.89
  -1   2   2 4634.74  398.67
  -1  -2   2 4714.96  394.40
   1  -2  -2 4762.19  393.80
  -1  -2   1   16.10    3.26
  -1   2   1   12.74    3.21
  -1  -2   1   16.42    3.65
  -1   2   1   19.94    4.77
  -1  -2   1   16.87    5.55
  -1  -2   1   15.47    3.63
  -1   2   1   19.23    3.90
   1  -2   0  511.47   44.75
  -1  -2   0  508.14   46.34
  -1   2   0  577.81   46.35
  -1   2   0  508.12   45.94
  -1  -2   0  569.15   46.02
  -1   2   0  524.10   48.76
  -1   2  -1  450.95   45.72
  -1   2  -1  502.04   41.04
  -1   2  -1  457.15   43.96
  -1  -2  -1  443.62   42.01
  -1   2  -1  452.57   41.77
  -1   2  -2  848.37   72.35
  -1   2  -2  810.75   75.96
  -1  -2  -2  829.45   75.39
  -1   2  -3 1120.29  124.25
  -1   2  -3 1429.58  118.49
   1  -2   3 1308.95  110.73
  -1  -2  -3 1431.13  115.59
  -1   2  -4  185.48   22.27
   1  -2   4  175.39   16.12
  -1  -2  -4  169.45   20.03
  -1   2  -5   32.88   15.27
  -1  -2  -5   22.56    4.46
  -1   2  -5   30.06    7.97
   1  -2   5   27.54    4.50
  -1  -2  -5   39.22    8.15
  -1  -2  -6  172.43   24.87
  -1   2  -6  220.94   39.37
  -1   2  -6  198.50   24.75
   1  -2   6  236.31   21.92
  -1  -2  -6  257.80   27.43
   1   2   7 1185.04   98.74
  -1   2  -7 1077.74  115.63
  -1  -2  -7  929.58   96.63
  -1   2  -7  955.36   95.35
  -1  -2  -7 1118.46  100.05
   1   2   7 1274.25   99.20
   1   2   8   47.78    9.95
  -1   2  -8   32.14   13.80
  -1  -2  -8   28.01    8.29
  -1  -2  -8   36.26    9.73
  -1  -2  -9  314.13   35.61
   1   2   9  273.70   31.60
   1  -2   9  308.08   26.78
  -1   2  -9  223.66   26.25
  -1   2  -9  229.22   28.06
  -1   2  -9  231.02   26.94
  -1  -2  -9  283.27   27.62
   1  -2   9  287.14   27.93
  -1   2 -10  378.85   42.16
  -1  -2 -10  449.55   42.61
   1  -2  10  481.15   43.38
  -1   2 -10  433.06   43.94
  -1  -2 -10  459.22   50.92
  -1   2 -10  399.87   41.64
  -1  -2 -10  511.60   64.10
  -1   2 -10  492.17   65.79
  -1  -2 -11    5.02    4.63
  -1   2 -11   -4.83    8.89
  -1  -2 -11    4.22    7.77
  -1   2 -11    8.72    3.73
   1   2  11   -3.92    5.90
   1  -2  11    3.11    7.38
  -1   2 -11    6.52    4.33
  -1  -2 -11    8.80    3.90
  -1  -2 -11    6.97    4.26
   1  -2  11    5.16    3.13
  -1   2 -11    7.12    4.56
  -1   2 -12   16.55    5.53
  -1  -2 -12   15.57    4.78
   1  -2  12   17.89    5.16
  -1   2 -12   12.83    5.36
  -1   2 -13  293.90   30.06
   1  -2  13  289.38   29.18
  -1  -2 -14  268.89   26.02
  -1   2 -14  270.34   26.57
  -1   2 -14  220.93   24.80
  -1   2 -14  254.38   25.39
  -1  -2 -15  240.99   23.29
  -1   2 -15  259.23   23.84
   1   2  15  210.84   23.20
   1  -2  15  274.27   24.21
  -1   2 -15  253.78   22.87
  -1  -3  15   -1.85    3.92
  -1   3  15    0.51    3.22
   1   3 -15    4.51    2.00
  -1  -3  14  225.94   22.32
   1   3 -14  190.23   20.50
  -1  -3  14  208.95   22.74
  -1   3  14  201.91   21.48
   1   3 -14  162.22   20.23
  -1  -3  13   60.80    9.87
   1   3 -13   39.76    8.33
   1   3 -13   44.65    8.22
  -1  -3  13   49.29   10.19
  -1   3  13   47.72    9.17
  -1  -3  13   34.41    7.20
  -1  -3  12   90.88   13.07
   1   3 -12   75.25   11.58
   1   3 -12   55.29   10.92
  -1  -3  11   21.87    6.49
   1  -3 -11    6.88    5.54
   1   3 -11    9.02    3.98
   1   3 -11    4.42    9.44
  -1   3  11   11.94    9.50
  -1  -3  11    7.49    8.01
  -1  -3  11   23.36    5.74
  -1  -3  11   15.26    5.53
   1   3 -11   13.27    5.68
  -1   3  10 1072.69  109.71
  -1  -3  10 1088.70  108.22
  -1  -3  10  987.06   88.72
  -1   3  10 1043.48   96.70
  -1  -3  10 1052.32   87.50
   1   3 -10  900.63   87.14
   1   3 -10  890.30   88.77
  -1  -3  10 1012.53   91.77
   1  -3 -10  979.09   95.56
   1  -3  -9    9.74    6.20
  -1   3   9    6.08    5.70
  -1  -3   9    1.37    2.91
  -1  -3   9    4.58    3.04
  -1   3   9    2.05    2.67
  -1  -3   9    0.99    2.11
  -1  -3   9    3.80    5.71
  -1   3   9   17.02   11.06
  -1  -3   9    8.27    6.80
   1   3  -9    3.34    2.36
   1   3  -9    4.73    3.98
  -1   3   8  652.92   65.79
  -1  -3   8  660.99   62.25
   1   3  -8  601.32   63.44
   1  -3  -8  660.87   65.29
  -1   3   8  761.72   83.30
  -1  -3   8  675.97   77.70
  -1  -3   7  572.74   51.05
  -1   3   7  461.32   52.54
   1   3  -7  545.46   52.13
   1  -3  -7  561.46   53.10
  -1  -3   7  456.04   49.96
  -1   3   6  955.15   85.77
  -1  -3   6  933.38   82.17
   1   3  -6  970.80   83.31
   1  -3  -6 1001.25   84.24
  -1  -3   6  798.17   80.63
  -1  -3   5  278.48   27.71
  -1   3   5  257.45   29.96
   1   3  -5  299.58   28.72
   1  -3  -5  305.44   29.07
  -1  -3   5  249.15   25.89
  -1  -3   4  434.66   36.36
   1  -3  -4  435.67   37.01
  -1   3   4  347.75   34.54
  -1  -3   4  350.51   33.22
  -1   3   4  507.16   51.63
   1   3  -4  408.05   36.53
  -1   3   3  576.12   57.19
   1  -3  -3  520.27   47.79
  -1   3   2  420.44   41.95
  -1  -3   2  430.62   36.40
   1  -3  -2  382.31   36.47
  -1  -3   1  902.61   71.74
  -1   3   1  692.08   71.90
  -1  -3   1  881.84   70.53
  -1   3   1  774.51   70.35
  -1   3   1  818.98   73.30
  -1  -3   1  865.02   71.72
  -1  -3   1  793.88   75.13
  -1  -3   0 1104.28   90.61
   1  -3   0 1111.99   88.73
  -1  -3   0  966.50   89.26
  -1   3   0 1071.09   89.16
  -1   3   0 1066.61   93.46
  -1  -3   0  970.62   89.66
  -1  -3  -1  130.39   13.28
  -1   3  -1  104.81   12.06
  -1   3  -1  112.18   12.10
  -1  -3  -1  117.79   12.83
  -1  -3  -1  109.94   13.37
  -1   3  -1  104.93   16.84
  -1  -3  -2 5592.15  476.60
  -1   3  -2 6038.25  475.32
  -1   3  -2 5952.52  483.76
  -1   3  -2 5268.00  475.77
  -1  -3  -2 5797.93  476.96
  -1   3  -2 5462.12  485.11
  -1  -3  -3 1383.60  123.96
  -1   3  -3 1607.73  132.52
  -1   3  -3 1390.55  122.39
  -1   3  -4  341.08   36.81
  -1  -3  -4  309.65   30.14
  -1   3  -4  370.49   48.21
   1   3   4  246.85   24.82
  -1   3  -5  246.71   28.70
  -1  -3  -5  179.33   23.25
  -1   3  -5  150.13   34.24
  -1   3  -6 2338.74  204.46
  -1  -3  -6 2240.04  202.84
  -1   3  -6 2624.33  230.21
  -1  -3  -7   19.30    7.38
  -1   3  -7   20.45   14.43
  -1  -3  -7   15.80    7.61
   1   3   7   17.04    6.34
  -1   3  -7   21.40    6.67
  -1   3  -7   20.28    7.74
  -1   3  -8   59.49    9.76
  -1  -3  -8   69.09   14.46
  -1   3  -8   34.31   16.37
   1   3   8   69.34   13.14
  -1   3  -8   57.19   11.40
  -1  -3  -8   62.74   14.29
  -1  -3  -9    2.28    4.27
   1   3   9   12.76    5.86
  -1   3  -9    9.86    4.22
   1  -3   9    5.94    3.25
   1  -3   9   18.58    5.25
  -1   3  -9   17.63    6.64
  -1   3  -9    9.06    8.36
  -1  -3  -9   10.87    4.27
  -1   3  -9   14.36    5.39
  -1   3 -10   79.45   12.90
   1   3  10   75.56   15.51
  -1  -3 -10   98.45   23.90
  -1   3 -10   56.40   20.51
  -1   3 -10  109.63   13.35
   1   3  10   78.43   21.67
  -1   3 -10   35.83   16.18
  -1   3 -10   91.76   14.62
   1  -3  10  107.72   14.04
  -1  -3 -10   79.07   17.38
  -1   3 -10   79.48   17.01
  -1   3 -10   79.63   12.72
  -1   3 -11  383.98   48.92
  -1  -3 -11  414.17   50.00
  -1  -3 -11  468.26   58.32
  -1   3 -11  358.98   56.60
  -1   3 -11  411.65   40.75
  -1   3 -11  348.23   40.06
   1   3  11  367.36   54.50
   1  -3  11  492.40   57.63
   1  -3  11  479.74   42.40
  -1   3 -11  456.69   43.73
  -1   3 -11  435.93   42.14
  -1   3 -12    3.16    3.72
   1  -3  12    8.73    3.73
  -1   3 -12    1.59    2.94
  -1   3 -12    7.90    4.65
  -1   3 -13  105.77   14.27
   1  -3  13  104.18   13.33
   1  -3  14    9.01    2.79
  -1   3 -14   14.43    4.39
  -1  -3 -14    9.73    3.86
  -1   3 -14   10.57    4.50
   1  -3  14    8.98    4.29
   1   3  14   10.77    3.84
  -1   3 -14    9.81    2.85
  -1   3 -14   11.06    3.81
  -1  -3 -15   10.28    2.74
  -1   3 -15    8.95    2.65
   1  -3  15    6.70    2.77
   1   4 -15    6.72    2.16
   1  -4 -15    6.12    2.49
  -1  -4  15   -0.47    2.82
  -1  -4  14    7.30    3.70
   1   4 -14    7.35    3.53
  -1  -4  14    7.28    4.58
   1   4 -14    8.16    3.99
  -1  -4  13   35.00    7.71
   1   4 -13   28.67    6.98
   1   4 -13   37.14    7.36
  -1   4  13   23.70    6.95
  -1  -4  13   31.78    8.33
  -1  -4  13   24.17    5.82
   1   4 -12  109.57   16.27
   1   4 -12  129.10   16.18
  -1   4  12  103.13   15.62
  -1  -4  12  129.81   18.23
  -1  -4  12  120.00   16.43
   1   4 -11   19.32    7.35
  -1  -4  11   19.02    5.26
   1   4 -11   14.68    5.61
  -1  -4  11   14.34    5.40
  -1  -4  11   24.49    7.45
  -1   4  11   11.76    8.43
   1   4 -11   37.79   15.90
  -1  -4  11    8.17    8.77
   1  -4 -11   11.25    6.46
   1  -4 -10    8.76    5.20
  -1   4  10   -2.31    3.47
  -1  -4  10   -0.87    3.71
  -1  -4  10    2.29    2.72
  -1  -4  10    6.68    5.31
   1   4 -10    2.00    2.60
   1   4 -10    6.62    4.66
  -1  -4  10    8.56    7.87
   1   4 -10    5.20    9.56
  -1   4  10    4.15    9.84
  -1  -4   9   35.81   10.53
   1  -4  -9   54.02   12.37
  -1   4   9   41.34   11.66
   1   4  -9   31.82   11.13
   1   4  -9   32.06    9.87
  -1  -4   9   43.67    8.89
  -1  -4   9   60.69   19.31
  -1   4   9   83.85   21.64
   1   4  -9   47.18    8.36
   1   4  -9   44.27    7.64
  -1  -4   9   50.40    8.30
   1  -4  -8  856.95   81.78
  -1   4   8  793.46   82.39
   1   4  -8  810.84   80.68
  -1  -4   8  875.35   82.60
  -1  -4   8 1014.82  101.00
   1   4  -7  224.96   28.28
   1  -4  -7  259.65   30.09
  -1   4   7  266.18   31.82
  -1   4   6 1255.46  121.46
   1  -4  -6 1330.44  119.27
   1   4  -6 1289.92  118.76
   1  -4  -5  325.52   28.42
   1   4  -5  353.81   28.75
   1  -4  -4  449.10   43.92
  -1   4   4  554.41   57.21
   1   4  -4  463.51   44.25
   1  -4  -3  574.18   56.55
  -1  -4   3  641.90   54.85
  -1  -4   2 5439.75  461.77
  -1   4   2 5027.73  460.29
  -1  -4   2 5592.16  460.35
  -1  -4   2 5850.76  460.91
  -1   4   2 6200.05  467.69
  -1  -4   1 1346.29  113.49
  -1   4   1 1447.57  116.01
  -1   4   1 1367.24  115.78
  -1   4   1 1221.99  111.06
  -1  -4   1 1387.07  111.21
  -1   4   1 1208.83  114.91
  -1   4   0  758.54   75.39
  -1  -4   0  688.13   69.01
  -1   4   0  796.29   68.86
  -1   4   0  874.52   75.27
  -1  -4   0  741.48   70.45
  -1   4   0  800.05   68.73
  -1  -4   0  786.77   69.17
   1  -4   0 1011.32   70.17
  -1  -4   0  977.68   72.31
   1  -4   1  406.24   35.85
  -1   4  -1  402.54   43.14
  -1   4  -1  379.55   35.46
  -1  -4  -1  410.31   36.23
  -1  -4  -2  504.16   47.61
  -1   4  -2  469.93   45.11
  -1  -4  -2  509.81   46.21
  -1   4  -2  417.48   54.74
  -1   4  -3   24.91   11.99
  -1  -4  -3   16.09    5.75
  -1   4  -3   10.81   10.03
  -1   4  -3   18.60    4.75
  -1   4  -3   12.75    5.08
  -1  -4  -3   21.34    6.46
  -1  -4  -4  271.43   29.18
  -1  -4  -4  280.88   31.93
  -1   4  -4  225.28   26.46
  -1   4  -4  266.57   37.39
  -1   4  -5   48.73   19.46
  -1  -4  -5   35.90    8.61
  -1   4  -5   10.21    8.82
  -1  -4  -6 1541.22  146.53
  -1   4  -6 1555.85  150.73
  -1  -4  -7  243.91   32.10
  -1   4  -7  251.23   33.61
  -1   4  -8   38.28    8.30
   1  -4   8   56.77    8.59
  -1  -4  -8   67.68   15.24
  -1   4  -8   77.46   25.32
  -1  -4  -8   75.78   15.23
   1   4   8   64.06   13.29
  -1  -4  -8   93.23   20.96
  -1   4  -8   64.54   13.82
  -1   4  -8   46.02   11.51
  -1   4  -9    5.20    9.79
  -1  -4  -9   22.11    8.80
   1  -4   9   33.15    7.52
  -1  -4  -9   26.28    9.73
  -1   4  -9   24.23    6.54
   1  -4   9   32.44    6.35
  -1   4  -9   12.24    9.92
   1   4   9   29.87    8.98
  -1  -4 -10  532.79   62.95
   1   4  10  484.67   53.41
  -1   4 -10  492.20   64.80
   1  -4  10  538.23   46.88
  -1   4 -10  479.87   47.58
   1  -4  10  542.09   48.83
  -1  -4 -10  518.78   57.15
  -1   4 -10  492.55   48.50
   1   4  10  508.54   65.11
  -1   4 -10  271.97   57.02
  -1   4 -10  479.92   50.06
  -1   4 -11   34.86    8.74
  -1   4 -11   30.07    7.70
   1  -4  11   42.38   10.25
  -1   4 -11   33.22    8.39
  -1  -4 -11   35.26   11.44
  -1   4 -11   43.24   12.46
  -1   4 -11   75.47   20.01
  -1  -4 -11   42.72   14.28
   1  -4  11   33.58   13.49
   1   4  11   26.29   12.35
  -1   4 -11   36.74    7.68
   1  -4  11   49.14    9.06
  -1   4 -12  377.41   40.37
   1  -4  12  484.94   42.48
  -1   4 -12  396.27   40.10
   1  -4  12  377.03   39.14
  -1  -4 -12  390.47   38.51
  -1   4 -12  396.62   38.67
   1  -4  13   79.83   10.91
  -1   4 -13   82.92   11.67
  -1  -4 -13   76.42   10.93
  -1   4 -13   69.69   11.55
   1  -4  14   32.27    5.31
   1  -4  14   31.95    6.24
  -1   4 -14   41.14    6.55
   1  -4  14   37.40    6.03
  -1  -4 -14   30.68    5.58
  -1   4 -14   41.48    7.01
  -1   4 -15   39.39    5.33
  -1  -5  15  237.87   19.53
   1   5 -15  165.29   17.88
   1  -5 -14    5.31    3.10
   1   5 -14    3.55    3.23
  -1  -5  14    4.55    3.04
   1   5 -14    7.05    3.15
  -1  -5  14    6.20    3.45
  -1  -5  13  338.15   32.08
   1   5 -13  258.35   30.61
   1   5 -13  294.00   30.57
  -1  -5  13  305.07   31.23
  -1  -5  13  313.22   30.04
  -1  -5  12  687.37   65.38
   1   5 -12  747.30   67.65
  -1  -5  12  713.57   67.11
  -1  -5  12  741.81   67.85
   1   5 -12  718.45   66.40
  -1  -5  12  831.70   68.09
  -1   5  12  637.80   64.99
  -1  -5  11  391.58   37.27
  -1   5  11  303.67   34.22
   1   5 -11  320.41   34.70
  -1   5  11  341.54   49.29
   1   5 -11  315.33   51.55
  -1  -5  11  439.51   55.67
  -1  -5  11  309.99   35.25
  -1   5  11  382.18   43.27
   1   5 -11  310.74   33.25
  -1  -5  11  380.65   34.51
   1   5 -11  321.09   36.14
  -1  -5  11  356.40   34.52
  -1  -5  11  311.63   37.01
   1   5 -10  276.02   31.40
   1  -5 -10  251.17   34.17
  -1   5  10  286.93   36.70
   1   5 -10  286.74   35.62
  -1  -5  10  234.81   29.23
  -1  -5  10  237.56   32.22
  -1   5  10  245.97   41.52
   1   5 -10  250.29   46.45
  -1  -5  10  280.16   46.54
  -1  -5  10  312.71   28.91
   1   5 -10  250.06   27.78
   1   5 -10  304.88   29.79
   1  -5  -9  207.31   28.26
  -1   5   9  214.17   29.54
   1   5  -9  162.73   28.72
   1   5  -9  206.55   28.11
  -1  -5   9  201.67   23.33
   1   5  -9  187.54   22.13
  -1  -5   9  216.81   39.95
   1   5  -9  195.17   21.70
  -1  -5   9  186.48   21.46
  -1  -5   9  220.00   28.26
  -1   5   8    4.31    4.58
   1   5  -8    5.42    3.84
  -1   5   8   -3.98    7.32
   1  -5  -8    1.82    2.74
   1   5  -8    2.67    2.68
  -1  -5   8    1.82    5.47
   1   5  -8    3.92    3.01
  -1  -5   8    3.86    2.72
  -1   5   7    3.76    9.78
   1   5  -7    1.58    2.91
  -1   5   7    5.97    5.18
   1  -5  -7    6.32    4.44
  -1  -5   7   -1.71    4.79
   1  -5  -6 1012.73   94.58
   1   5  -6  976.18   94.61
   1   5  -5    3.54    3.31
  -1   5   5    3.03    5.56
  -1   5   5   -0.62    2.36
   1  -5  -5    3.38    2.67
   1  -5  -4  898.50   85.22
  -1   5   4 1154.90   98.63
  -1  -5   3  606.47   55.55
  -1   5   3  507.82   53.36
  -1   5   3  710.45   63.94
  -1  -5   3  652.63   53.11
  -1   5   2  385.69   36.87
  -1  -5   2  481.83   37.34
  -1  -5   2  400.28   39.06
  -1   5   2  497.46   45.37
  -1  -5   2  427.41   39.94
  -1   5   2  335.69   39.23
  -1   5   1   37.03    7.58
   1   5  -1   23.61    3.92
  -1   5   1   27.57    7.31
  -1  -5   1   21.91    5.37
  -1   5   1   17.69    7.03
  -1   5   0   26.94    7.98
  -1  -5   0   23.69    5.68
  -1   5   0   24.71    9.16
   1  -5   0   23.90    4.60
  -1  -5   0   30.75    6.14
  -1   5  -1  108.29   11.76
  -1  -5  -1  108.20   12.18
   1   5   1  113.30   13.46
   1  -5   1  124.73   13.15
  -1   5  -2 3528.11  312.91
  -1  -5  -2 3705.47  313.89
   1  -5   2 3882.63  314.19
  -1   5  -2 4546.35  329.69
  -1   5  -3  480.86   52.49
  -1  -5  -3  388.19   39.12
  -1  -5  -3  374.49   37.23
  -1   5  -3  319.85   35.49
  -1   5  -3  391.75   37.37
  -1   5  -3  401.56   51.30
  -1   5  -4    4.01    9.52
  -1  -5  -4    8.49    5.02
  -1  -5  -4   12.11    5.75
  -1   5  -4   12.19    5.67
  -1   5  -4    6.69    9.40
  -1   5  -4    4.56    3.48
  -1  -5  -5  211.03   26.40
  -1   5  -5  155.13   25.08
  -1  -5  -5  238.05   28.85
  -1   5  -5  205.31   34.39
  -1   5  -5  215.91   25.00
  -1   5  -6  486.42   69.35
  -1  -5  -6  462.89   49.24
  -1  -5  -6  516.03   52.46
  -1   5  -6  385.92   50.01
  -1   5  -6  449.55   55.48
  -1   5  -7 1003.08  106.35
  -1   5  -7  723.23   80.78
  -1  -5  -7  808.53   78.69
  -1  -5  -7  900.84   83.13
  -1   5  -7  644.63   79.58
  -1  -5  -8 1037.29   98.74
  -1   5  -8  853.04  101.31
  -1  -5  -8 1104.59  103.48
   1   5   8 1064.16   97.44
   1  -5   8  975.41   88.30
  -1   5  -8  935.46   89.63
  -1   5  -8  941.74   90.36
  -1   5  -8 1217.94  124.36
  -1  -5  -8 1065.70  100.72
  -1   5  -8 1093.23   89.95
  -1   5  -8 1077.95   94.92
  -1   5  -8  936.99   98.86
   1  -5   9  431.74   42.93
   1   5   9  499.03   50.45
  -1   5  -9  302.83   50.87
  -1  -5  -9  440.33   53.46
  -1  -5  -9  421.16   50.37
  -1   5  -9  473.16   46.70
  -1   5  -9  383.95   42.13
   1  -5   9  473.98   41.54
  -1  -5  -9  397.68   49.56
   1   5   9  435.72   58.51
  -1   5  -9  442.52   65.86
  -1  -5 -10   30.82   10.72
  -1   5 -10   14.22   10.16
  -1  -5 -10   38.70   12.78
   1   5  10   29.72    9.48
   1  -5  10   20.62    6.25
   1  -5  10   27.72    6.02
  -1   5 -10   14.99    5.66
  -1   5 -10   35.07   16.92
  -1  -5 -11  499.85   48.21
  -1   5 -11  498.60   49.59
  -1   5 -11  616.37   49.94
   1  -5  11  625.79   53.99
   1  -5  11  556.65   49.83
   1  -5  12  173.51   20.86
  -1   5 -12  167.81   20.17
  -1   5 -12  201.62   22.72
   1  -5  12  167.45   22.17
  -1   5 -12  177.15   21.49
  -1  -5 -12  179.06   20.16
  -1  -5 -12  187.91   20.29
  -1   5 -12  196.37   19.91
  -1   5 -13   34.17    7.15
   1  -5  13   32.66    6.45
  -1   5 -13   31.09    5.36
  -1  -5 -13   37.67    6.61
   1  -5  13   38.92    6.85
   1  -5  13   34.98    7.06
  -1  -5 -14    4.53    2.03
  -1   5 -14    6.28    2.88
  -1   5 -14    6.74    3.29
   1  -5  14    5.23    2.01
   1  -5  14    9.16    2.79
   1  -5  14    4.44    2.68
  -1   5 -15   11.03    2.31
   1  -6 -15   13.37    2.59
   1   6 -15   13.49    2.58
   1  -6 -14    3.07    2.61
   1   6 -14   -0.59    2.25
  -1  -6  14    0.68    2.29
   1   6 -14    2.56    2.55
   1  -6 -13   -2.22    3.24
   1   6 -13    0.83    3.31
  -1  -6  13    1.88    2.63
  -1  -6  13    1.41    2.59
   1   6 -13    0.91    3.06
  -1  -6  12  320.81   31.35
   1   6 -12  304.14   31.48
  -1  -6  12  269.57   31.40
  -1  -6  12  304.74   30.37
   1   6 -12  285.32   29.78
  -1  -6  12  311.62   30.85
   1   6 -12  311.79   32.70
  -1  -6  11  602.79   55.83
  -1  -6  11  539.72   51.30
  -1  -6  11  555.88   53.17
   1   6 -11  429.66   49.76
  -1  -6  11  606.03   51.51
   1   6 -11  535.28   52.10
  -1  -6  11  595.56   52.65
  -1  -6  10   65.60   13.66
   1   6 -10   50.47    9.68
  -1  -6  10   73.90   10.68
  -1   6  10   72.37   15.82
  -1  -6  10   70.64   10.83
   1   6 -10   68.75   22.35
  -1  -6  10   49.10   20.18
   1   6 -10   68.21   11.29
  -1  -6  10   74.25   12.24
  -1  -6  10   65.10   11.12
  -1   6  10   49.56    9.58
   1   6 -10   66.30   14.69
  -1   6   9  218.83   27.14
   1  -6  -9  306.05   35.52
  -1   6   9  217.30   33.95
   1   6  -9  247.59   27.84
  -1  -6   9  341.73   29.35
  -1   6   9  315.34   45.18
   1   6  -9  244.24   45.93
  -1  -6   9  283.29   28.36
  -1  -6   9  304.75   34.47
   1   6  -9  240.27   28.18
   1   6  -9  286.48   39.31
   1   6  -9  248.10   33.93
   1   6  -9  283.89   31.75
   1  -6  -8 1224.97  108.06
  -1   6   8 1099.42  109.20
   1   6  -8 1096.54  107.59
   1   6  -8 1307.26  119.58
  -1   6   8 1468.18  125.75
  -1  -6   8 1572.83  137.73
  -1  -6   8 1132.59  104.68
  -1  -6   8 1090.53  100.33
  -1  -6   8 1478.04  110.66
   1   6  -8 1063.54  101.02
  -1  -6   8 1188.39  100.81
   1   6  -8  997.64  100.20
  -1   6   7 1053.48   97.88
  -1  -6   7  917.69   76.64
  -1  -6   7  747.38   75.48
  -1  -6   7  988.00   83.87
   1  -6  -7  874.76   82.23
   1   6  -7  805.60   82.10
  -1  -6   6  251.22   26.26
   1  -6  -6  263.85   31.03
  -1   6   6  335.17   43.80
   1   6  -6  294.66   32.39
  -1   6   5  231.31   33.37
   1   6  -5  206.51   24.45
  -1  -6   5  163.05   22.47
  -1  -6   4  732.00   56.38
  -1   6   4  815.13   67.67
  -1  -6   3   73.26   11.80
  -1   6   3   60.85    8.68
  -1   6   3   96.85   17.05
  -1  -6   3   85.52   10.49
  -1  -6   2 1301.76  106.57
  -1   6   2 1363.56  111.41
  -1  -6   2 1319.12  107.00
  -1   6   2  957.48  105.36
  -1   6   1  171.93   19.88
  -1   6   1  131.76   18.65
  -1  -6   1  132.11   17.22
  -1   6   1  132.81   19.40
   1   6   0  651.98   51.87
  -1  -6   0  414.19   48.87
  -1   6   0  584.86   55.79
   1  -6   0  569.42   49.91
  -1  -6   0  594.27   52.36
  -1   6   0  632.92   58.67
   1   6   1   58.24    9.25
  -1   6  -1   94.18   16.38
  -1   6  -1   87.36   18.15
   1  -6   1   66.94    9.64
   1  -6   2    3.91    2.50
  -1   6  -2    2.84    1.86
  -1   6  -2    2.48    5.26
  -1   6  -3 1011.82   93.35
  -1   6  -3 1453.67  115.33
  -1   6  -3 1044.05   96.96
  -1   6  -3 1410.19  117.22
   1   6   3  992.04   93.40
   1  -6   3 1185.89   95.90
  -1  -6  -4  415.03   41.24
  -1   6  -4  557.62   60.00
  -1   6  -4  448.73   42.98
  -1   6  -4  581.99   62.42
  -1  -6  -4  384.07   41.10
  -1   6  -4  338.08   39.46
  -1   6  -5   10.99   11.00
  -1   6  -5    7.73    4.64
  -1   6  -5    4.71    9.99
  -1  -6  -5   -1.49    2.75
  -1   6  -5    1.40    3.32
  -1  -6  -5    7.20    4.68
  -1  -6  -6  304.82   34.99
  -1   6  -6  256.67   32.07
  -1   6  -6  291.22   41.92
  -1  -6  -6  260.96   33.08
  -1   6  -6  239.88   32.49
  -1   6  -7  588.21   76.45
  -1  -6  -7  530.93   55.45
  -1   6  -7  413.98   53.05
  -1  -6  -7  552.06   55.81
   1  -6   7  501.46   45.81
  -1   6  -7  456.83   47.10
  -1   6  -7  528.15   51.73
  -1   6  -7  490.01   47.81
  -1   6  -7  479.32   59.99
  -1   6  -7  474.18   46.09
  -1   6  -8   17.91    5.99
  -1   6  -8   11.93   12.80
   1   6   8   15.35   10.16
  -1  -6  -8   19.01   10.57
  -1  -6  -8   21.93    9.16
   1   6   8   22.02    8.65
  -1   6  -8   21.04    9.46
   1  -6   8   28.41    6.22
  -1   6  -8   26.32    6.86
  -1   6  -8   37.52    9.98
  -1   6  -8   37.09   12.63
  -1   6  -8   23.52    6.28
  -1   6  -9   54.03   11.89
  -1  -6  -9   71.66   16.06
  -1   6  -9   54.60   15.36
   1   6   9   60.27   14.20
  -1   6  -9   50.11    9.38
  -1   6  -9   53.76   10.29
   1  -6   9   57.25    9.24
  -1   6  -9   55.07   10.99
  -1  -6  -9   80.95   17.41
  -1   6  -9   63.08   24.03
   1   6   9   81.30   20.66
  -1  -6  -9   51.25    9.98
  -1  -6 -10   33.21    7.56
  -1   6 -10   20.56   12.38
   1   6  10   33.53   13.29
  -1   6 -10   28.17    7.85
   1  -6  10   36.02   10.20
  -1  -6 -10   20.38    8.82
   1   6  10   15.15    7.22
   1  -6  10   35.72    6.86
  -1   6 -10   21.30    6.55
   1  -6  10   22.43    6.63
  -1   6 -10   27.72    6.17
  -1  -6 -11  107.18   14.50
  -1   6 -11  141.40   15.37
   1  -6  11  126.90   15.20
  -1   6 -11  108.95   15.73
  -1  -6 -11  122.24   15.72
  -1   6 -11  117.02   17.30
   1  -6  11  161.06   20.72
  -1   6 -11  120.56   17.55
   1  -6  11  111.51   16.06
   1  -6  12  844.19   74.28
   1  -6  12  809.82   74.88
  -1  -6 -12  872.75   73.87
   1  -6  12  801.11   76.27
  -1   6 -12  830.98   74.35
  -1   6 -12  808.47   72.78
  -1   6 -13  253.38   23.76
   1  -6  13  193.01   22.06
  -1   6 -14    2.92    2.49
   1  -6  14    2.85    1.74
   1  -6  14    1.94    1.34
   1  -7 -14   84.45    9.96
  -1  -7  14   88.70   10.94
   1   7 -14   88.34   10.86
   1   7 -14   91.08   10.61
  -1  -7  13  212.58   20.69
   1   7 -13  194.34   21.18
  -1  -7  13  178.81   21.23
  -1  -7  12  783.61   68.12
  -1  -7  12  784.18   67.77
   1   7 -12  700.97   67.01
   1   7 -12  721.64   68.58
  -1  -7  12  780.44   69.69
  -1  -7  11    1.48    5.22
  -1  -7  11    1.78    2.32
   1   7 -11   -0.92    2.93
   1   7 -11    7.69    4.51
  -1  -7  11    1.90    3.19
  -1  -7  11    1.21    3.14
   1   7 -11    2.50    4.60
   1   7 -10   18.04    6.84
  -1   7  10   16.57    8.02
  -1  -7  10   21.01    7.91
   1   7 -10    2.36    4.47
  -1  -7  10   10.93    4.60
   1   7 -10   17.23    5.95
  -1  -7  10   18.90    8.22
  -1   7  10   14.58   10.29
   1   7 -10   15.30   12.15
   1   7 -10   12.00    4.98
  -1  -7  10   19.93    5.44
   1   7  -9   49.42   10.97
  -1   7   9   50.88   13.21
  -1  -7   9   40.60   11.42
   1   7  -9   37.42   13.82
   1   7  -9   55.65   13.39
  -1  -7   9   45.60    8.67
   1   7  -9   54.32    9.83
  -1  -7   9   43.62   11.61
   1   7  -9   36.70    8.41
  -1  -7   9   61.92    9.82
  -1  -7   9   62.99   22.63
  -1   7   9   64.14   18.34
  -1  -7   8   75.22   14.99
  -1  -7   8   44.32    8.53
   1   7  -8   87.15   20.37
   1   7  -8   48.16   12.38
  -1  -7   8   55.41   12.74
  -1  -7   8   45.63   10.95
  -1  -7   8   48.57    8.88
   1   7  -8   56.04    9.86
  -1  -7   8   42.88   20.16
  -1   7   8   55.71   17.70
   1   7  -8   51.87   20.30
  -1  -7   7  886.77   79.75
   1   7  -7  754.97   78.76
  -1  -7   7  745.92   71.64
   1   7  -7  737.18   72.46
  -1  -7   7  788.92   72.28
  -1   7   7  913.94   90.96
  -1  -7   7  938.66   79.44
   1   7  -6   87.84   15.92
  -1   7   6  113.21   22.83
  -1  -7   6   74.81   10.84
  -1   7   6   62.66   10.46
  -1  -7   6   84.05   14.57
  -1  -7   6  111.35   16.70
  -1   7   6   50.55   13.82
  -1   7   5   28.60   12.21
   1   7  -5   14.83    6.20
  -1  -7   5    7.65    5.40
  -1   7   5   16.96    4.52
  -1  -7   5   25.65    7.45
  -1   7   4   53.83   14.39
  -1  -7   4   50.46   10.41
  -1   7   3  642.92   60.28
  -1  -7   3  505.62   53.12
  -1   7   2    3.28    4.26
  -1  -7   2    1.14    4.00
  -1   7   2   -1.20    4.41
  -1  -7   2    2.38    2.53
   1   7  -1  759.82   71.58
  -1  -7   1  662.17   68.99
  -1   7   1  758.04   69.99
  -1   7   1  708.74   70.01
  -1  -7   1  744.38   68.10
   1   7   0  185.15   23.17
  -1   7   0  180.81   25.36
  -1   7   0  218.47   28.52
   1  -7   0  185.41   20.90
  -1  -7   0  206.57   23.50
  -1   7  -1   68.41   15.31
   1   7   1   88.57   14.17
  -1   7  -1  115.54   21.01
   1  -7   1   86.02   12.07
  -1   7  -2   64.46   15.97
   1   7   2   61.19   13.95
   1  -7   2   70.45   10.81
  -1   7  -3  166.22   28.03
   1   7   3  129.15   22.36
  -1   7  -3  109.19   17.64
   1  -7   3  144.06   17.48
   1   7   4 1229.08  113.93
  -1   7  -4 1457.56  125.39
  -1   7  -4 1006.36  104.71
  -1   7  -4 1588.21  127.46
   1  -7   4 1070.10  103.02
  -1   7  -5   18.39   12.95
   1   7   5   12.16    7.98
   1  -7   5   12.75    5.53
  -1   7  -5   16.27    4.34
  -1   7  -5   11.74   11.79
  -1   7  -5    8.95    5.48
  -1   7  -6   33.66    9.09
  -1   7  -6   25.98    8.93
  -1   7  -6   39.20    6.97
  -1   7  -6   30.45   14.27
  -1   7  -6   29.96    7.51
   1  -7   6   30.83    8.55
  -1   7  -6   30.28    7.11
   1  -7   6   44.80    7.27
  -1   7  -6   26.13   14.93
   1   7   6   33.49   12.63
  -1   7  -7  630.67   52.26
  -1   7  -7  660.94   71.24
  -1   7  -7  498.22   58.80
   1  -7   7  674.57   53.02
  -1   7  -7  459.18   52.70
  -1   7  -7  498.36   53.61
  -1   7  -7  509.23   52.01
   1   7   7  591.40   68.72
  -1   7  -7  575.33   56.66
  -1  -7  -8 1249.14  113.07
  -1   7  -8 1497.82  147.35
   1   7   8 1276.77  129.98
  -1  -7  -8 1401.02  127.12
  -1   7  -8 1427.66  117.77
   1   7   8 1329.10  121.74
  -1   7  -8 1400.59  112.31
  -1   7  -8 1081.02  124.48
  -1   7  -8 1129.62  113.73
  -1   7  -8 1418.09  113.00
   1  -7   8 1308.15  112.09
  -1   7  -8 1201.35  113.80
  -1   7  -8 1115.08  112.37
  -1   7  -9   15.47    6.93
  -1  -7  -9   28.94    7.03
  -1   7  -9   42.84    8.08
  -1   7  -9   40.55    9.68
   1   7   9   22.68    9.28
  -1   7  -9   39.28   18.00
   1   7   9   14.78   11.31
  -1  -7  -9   31.59   11.73
  -1   7  -9   27.73    7.57
   1  -7   9   21.95    5.72
  -1   7  -9   27.93    6.29
  -1   7 -10  153.73   22.05
  -1   7 -10  179.27   19.69
   1  -7  10  192.97   22.50
  -1  -7 -10  184.24   20.88
  -1   7 -10  173.47   21.99
   1  -7  10  152.52   23.19
   1  -7  10  187.37   20.88
  -1   7 -10  160.19   23.30
   1  -7  10  195.59   20.26
  -1   7 -10  156.00   20.91
  -1   7 -11  693.88   65.24
  -1   7 -11  689.19   65.66
  -1   7 -11  662.43   61.77
  -1  -7 -11  681.23   62.90
  -1   7 -11  601.47   63.89
   1  -7  11  624.81   63.77
   1  -7  11  633.27   65.92
   1  -7  11  815.91   64.52
  -1   7 -11  784.66   64.93
   1  -7  11  743.76   62.67
   1  -7  12  197.61   21.39
   1  -7  12  189.08   22.44
  -1   7 -12  189.45   20.86
  -1  -7 -12  185.08   19.94
   1  -7  13   -0.60    1.67
  -1   7 -13    1.41    1.80
   1  -7  14    9.41    2.41
  -1  -8  14    0.88    1.62
   1   8 -14    3.05    1.82
   1   8 -13   32.16    6.38
   1   8 -13   45.82    7.08
  -1  -8  13   28.52    6.24
  -1  -8  12   77.68    9.91
   1   8 -12   56.73    8.95
   1  -8 -12   73.05   10.08
   1   8 -12   50.10    9.40
  -1  -8  12   65.37    9.56
   1   8 -12   61.20   10.33
  -1  -8  12   63.08   10.60
   1  -8 -11  837.62   74.51
   1   8 -11  846.24   75.47
  -1  -8  11  830.91   74.30
   1   8 -11  884.75   76.23
  -1  -8  11  884.57   74.33
   1   8 -11  693.97   73.37
  -1  -8  10  209.01   21.37
   1   8 -10  149.77   20.33
   1  -8 -10  162.49   20.73
  -1  -8  10  174.57   20.74
  -1  -8  10  216.17   25.49
   1   8 -10  169.46   21.35
   1   8 -10  192.32   22.97
  -1  -8   9    5.19    3.94
  -1  -8   9    1.72    5.80
  -1  -8   9   10.10    5.05
   1   8  -9    8.64    4.62
  -1  -8   9    4.91    3.66
   1   8  -9   12.31    5.84
  -1  -8   9    5.95    3.38
   1   8  -9   14.54    7.30
   1   8  -9   18.85   11.07
  -1  -8   9    5.04    7.58
  -1   8   9   21.32   10.68
  -1  -8   9    6.96    4.96
  -1  -8   8  653.15   66.55
  -1  -8   8  633.50   70.29
   1   8  -8  722.53   66.49
  -1   8   8  687.82   78.85
   1   8  -8  583.07   82.45
  -1  -8   8  905.97   94.91
  -1  -8   8  685.27   63.37
   1   8  -8  673.90   63.94
   1   8  -8  796.57   81.48
   1   8  -8  665.26   71.34
  -1  -8   7   72.74   11.30
   1   8  -7   58.49   11.18
  -1  -8   7  117.01   28.72
  -1   8   7   92.51   20.85
   1   8  -7   76.34   22.92
  -1   8   7   92.76   17.49
  -1  -8   7   72.64   15.56
  -1  -8   7   66.31   13.84
  -1  -8   7   72.99   14.23
   1   8  -7   83.26   16.67
   1   8  -7  129.89   26.26
   1   8  -6  374.33   37.01
  -1  -8   6  360.61   35.94
  -1   8   6  383.65   49.24
   1   8  -6  457.45   57.54
  -1  -8   6  435.84   59.42
  -1   8   6  338.12   35.65
  -1   8   6  302.55   41.97
  -1  -8   6  321.81   40.60
  -1  -8   6  377.26   39.64
  -1  -8   6  404.81   41.76
   1   8  -6  362.08   42.42
  -1  -8   5  153.92   17.81
  -1  -8   5  140.67   21.66
  -1   8   5  164.88   18.19
  -1   8   5  164.72   27.49
   1   8  -5  181.39   32.07
  -1  -8   5  206.43   36.08
  -1  -8   5  132.30   16.80
  -1  -8   5  149.16   20.06
   1   8  -5  132.79   21.95
  -1  -8   5  165.04   22.48
  -1   8   4  483.96   44.55
   1   8  -4  502.44   59.59
  -1   8   4  428.93   53.15
  -1  -8   4  444.91   43.66
  -1  -8   4  504.52   46.99
  -1  -8   4  451.38   48.87
  -1  -8   4  511.97   49.67
  -1   8   3 1411.40  118.40
   1   8  -3 1281.93  121.26
  -1  -8   3 1227.63  121.67
  -1  -8   3 1118.18  108.36
  -1  -8   3 1300.97  112.01
  -1  -8   3 1209.16  112.29
  -1   8   3 1250.29  107.49
  -1  -8   2   99.79   16.57
  -1   8   2   94.93   16.34
  -1  -8   2  124.11   17.02
  -1   8   2  131.62   19.95
  -1  -8   2  108.83   19.78
  -1  -8   2  150.75   18.88
   1   8  -2  129.70   21.47
   1   8  -1   14.27    6.37
  -1   8   1   15.11    6.75
  -1  -8   1   11.16    5.64
   1   8   0  118.03   17.89
  -1   8   0  147.24   21.68
  -1   8   0  148.01   22.77
   1  -8   0  120.86   16.68
  -1  -8   0  157.68   20.30
  -1   8  -1  933.65   92.07
  -1   8  -1 1106.72   96.86
   1  -8   1  884.40   84.31
  -1   8  -2   29.66   11.05
   1   8   2   33.57    9.65
   1  -8   2   24.50    6.72
  -1   8  -2   48.71   15.05
   1   8   2   47.61    9.47
   1   8   3 1067.18   98.84
  -1   8  -3 1137.97  107.26
   1  -8   3 1040.88   90.87
   1  -8   3 1006.23   88.34
   1  -8   3 1037.36   92.50
  -1   8  -3 1019.13   88.71
  -1   8  -3  864.38   93.89
   1   8   4  223.50   34.91
  -1   8  -4  317.86   45.51
  -1  -8  -4  247.21   27.81
   1  -8   4  304.75   27.42
  -1   8  -4  247.03   26.74
  -1   8  -4  282.99   33.97
   1  -8   4  264.38   30.77
   1  -8   5   12.96    4.72
  -1   8  -5   11.84    5.41
   1  -8   5   11.01    5.61
  -1   8  -5    6.28    4.26
  -1  -8  -5   14.36    4.96
  -1   8  -5   12.17    4.93
   1  -8   5   14.05    4.24
  -1   8  -5    4.51    8.33
   1   8   5    8.82    7.03
  -1   8  -5   10.27    5.84
  -1   8  -5   12.94    4.22
  -1   8  -5    3.97    7.35
  -1   8  -6  104.61   15.96
  -1   8  -6  152.19   18.85
   1  -8   6  123.16   19.40
  -1   8  -6  152.64   16.37
  -1   8  -6  125.85   27.43
  -1   8  -6  118.63   21.26
  -1  -8  -6  105.02   15.82
  -1   8  -6  177.07   35.50
   1   8   6  132.86   25.53
   1  -8   6  143.89   16.28
  -1   8  -6  120.45   17.09
   1  -8   6  110.92   15.29
  -1   8  -7 1019.68   90.63
   1  -8   7  945.89   93.63
  -1   8  -7 1015.31   87.01
  -1   8  -7  823.10   94.51
  -1   8  -7 1030.26  106.80
  -1   8  -7  899.85   88.89
   1   8   7 1018.56  103.93
  -1   8  -7 1107.63  117.45
   1  -8   7 1058.15   87.93
   1  -8   7 1141.47   93.41
  -1   8  -7  965.22   88.06
  -1   8  -7  893.75   88.97
   1  -8   7  941.23   86.90
   1  -8   8   53.65   12.15
  -1   8  -8   37.43    9.39
   1  -8   8   42.83   11.27
   1   8   8   44.33   12.23
   1  -8   8   47.34    8.91
   1   8   8   38.75   14.50
  -1  -8  -8   48.99   16.34
  -1   8  -8   40.75    9.46
   1  -8   8   45.33    8.43
  -1   8  -8   43.62   14.31
  -1   8  -8   45.34   12.83
  -1   8  -8   57.99    8.82
  -1   8  -8   44.03   10.08
  -1   8  -8   51.30    9.21
  -1   8  -9   10.15    6.65
  -1   8  -9   14.71    4.50
   1  -8   9    4.39    3.71
  -1   8  -9   20.98    6.60
  -1   8  -9    3.80    3.66
  -1   8  -9   12.00    4.70
   1  -8   9   13.92    4.79
  -1   8  -9   19.80    6.62
  -1   8 -10   12.97    5.70
  -1   8 -10   22.30    5.22
   1  -8  10   21.69    5.99
  -1   8 -10   30.39    7.83
   1  -8  10   18.65    6.52
  -1   8 -10   24.72    9.15
  -1   8 -10   21.43    6.44
   1  -8  10   20.82    5.23
  -1  -8 -10   16.20    5.57
  -1  -8 -11   17.98    5.08
  -1   8 -11   11.99    4.82
  -1   8 -11   24.52    6.16
   1  -8  11   18.92    4.62
   1  -8  11   14.04    5.17
  -1   8 -11   16.55    5.53
  -1   8 -11   10.25    6.07
   1  -8  11   22.52    7.75
   1  -8  11   14.88    4.67
  -1  -8 -12  370.11   33.60
  -1   8 -12  359.54   34.91
   1  -8  12  347.00   34.65
  -1   8 -12  289.42   34.17
  -1   8 -12  344.23   34.27
   1  -8  12  373.16   36.02
   1  -8  12  435.07   34.91
  -1   8 -13   81.51    8.95
  -1   8 -13   67.06    8.29
   1   9 -13   13.95    3.63
   1   9 -13   18.01    4.24
   1  -9 -13   23.25    4.08
   1   9 -12   72.91   10.68
   1  -9 -12   86.78   10.77
   1   9 -12   70.21   10.02
  -1  -9  12   87.50   10.47
   1   9 -12   81.73   10.90
   1   9 -12   76.85   11.54
  -1  -9  11  146.84   15.31
   1   9 -11   90.20   13.94
   1  -9 -11  115.20   14.67
   1   9 -11  121.07   15.49
  -1  -9  11  130.34   15.20
  -1  -9  10  133.57   19.74
   1   9 -10  156.20   19.59
  -1  -9  10  183.29   19.56
   1  -9 -10  169.89   19.59
   1   9 -10  166.82   20.41
  -1  -9  10  164.25   19.33
  -1  -9   9    4.89    3.12
   1   9  -9    2.18    3.66
  -1  -9   9    1.29    3.07
   1   9  -9   -1.21    3.40
   1  -9  -9    7.11    4.94
  -1  -9   9    1.20    3.13
  -1  -9   8   38.64   10.22
  -1  -9   8   38.37    9.15
   1   9  -8   42.96    9.18
  -1  -9   8   18.38    8.04
  -1   9   8   35.15   10.50
   1   9  -8   23.86   12.21
   1   9  -8   29.85   10.14
  -1   9   8   40.14   14.81
   1   9  -8   19.04   11.52
  -1  -9   8   42.27   16.69
   1  -9  -8   15.69    5.80
   1   9  -8   35.88    8.19
  -1  -9   8   28.48    6.70
   1   9  -8   22.65    6.86
  -1  -9   7 1982.12  166.34
   1   9  -7 2061.40  164.17
  -1  -9   7 1935.75  170.24
  -1   9   7 1773.00  169.89
   1   9  -7 2065.31  181.06
   1   9  -7 1678.09  169.61
  -1  -9   7 1934.30  186.68
   1   9  -7 1706.71  182.47
  -1   9   7 2061.57  178.64
   1  -9  -7 1832.27  161.60
  -1  -9   7 1891.25  165.31
  -1  -9   7 1796.39  161.43
   1   9  -7 1744.61  161.95
  -1  -9   6   10.87    4.34
   1   9  -6    1.12    3.58
  -1  -9   6    2.10    3.87
  -1   9   6    2.36    5.02
  -1  -9   6    5.43    3.34
  -1   9   6   10.04    4.01
   1  -9  -6    0.98    3.30
  -1  -9   6    8.60   10.21
  -1   9   6   18.49    9.25
   1   9  -6   -4.29    4.56
  -1  -9   6    6.60    4.96
  -1  -9   6    7.18    5.29
   1   9  -6   -3.68    6.77
   1   9  -6    7.02    5.56
  -1  -9   5   27.43    6.48
  -1  -9   5   35.34    9.79
  -1   9   5   41.56   11.43
  -1  -9   5   24.63    5.89
  -1  -9   5   15.19   10.10
  -1   9   5   22.47   10.54
   1   9  -5    3.85    8.46
  -1  -9   5   27.09    7.68
  -1  -9   5   35.09    9.21
   1  -9  -5   31.74    6.94
   1   9  -5   22.01    9.59
  -1   9   5   27.70    6.37
  -1   9   4   22.32    9.94
   1   9  -4    3.36    7.27
  -1  -9   4   15.80   10.15
  -1  -9   4   12.88    6.01
   1  -9  -4   19.89    5.30
  -1   9   4   17.92    4.90
  -1  -9   4   14.94    6.68
  -1  -9   4   21.68    6.32
  -1  -9   3 1124.11  113.61
  -1   9   3 1486.00  109.66
  -1   9   3 1200.13  116.81
   1   9  -3 1137.43  120.21
  -1  -9   3 1001.73  116.56
   1   9  -2   91.87   19.01
  -1   9   2  121.04   14.23
  -1   9   2  124.19   13.94
  -1  -9   2  102.02   16.04
   1  -9  -2   91.54   13.47
  -1  -9   2  111.95   17.96
  -1  -9   1 1323.38  109.17
   1  -9  -1 1154.88  106.63
  -1   9   1 1213.66  105.36
  -1  -9   1 1215.37  111.72
  -1   9   1 1131.17  111.82
   1   9  -1 1183.58  112.80
  -1  -9   1 1297.96  114.51
  -1   9   0    3.45    2.75
  -1   9   0    2.16    5.14
  -1   9   0    4.06    4.32
  -1  -9   0    4.28    3.60
  -1  -9  -1  500.01   44.10
  -1   9  -1  407.85   50.36
  -1   9  -1  410.22   41.08
  -1   9  -1  434.05   52.30
   1   9   1  476.45   48.13
   1  -9   1  442.36   44.62
   1  -9   2  279.46   30.60
   1  -9   2  253.61   27.77
  -1  -9  -2  259.30   27.83
  -1   9  -2  233.74   36.20
  -1   9  -2  288.26   27.39
  -1  -9  -2  261.82   28.52
  -1   9  -2  339.35   41.94
   1   9   2  273.68   30.44
   1  -9   3 1461.03  127.65
  -1   9  -3 1408.84  131.02
  -1  -9  -3 1414.91  124.15
   1  -9   3 1501.70  123.14
   1  -9   3 1405.58  124.68
  -1   9  -3 1264.43  123.39
  -1   9  -3 1482.04  126.23
  -1   9  -3 1609.01  142.30
   1  -9   4  115.44   17.93
  -1   9  -4  103.08   19.17
  -1  -9  -4  119.44   15.73
  -1   9  -4  123.70   16.12
   1  -9   4  119.80   16.58
   1  -9   4  114.80   14.40
  -1   9  -4  119.71   26.07
   1   9   4  134.41   22.71
   1  -9   4  117.83   15.11
  -1   9  -4  100.08   15.99
  -1   9  -5  743.17   69.11
   1  -9   5  711.91   66.32
   1  -9   5  733.06   71.46
  -1   9  -5  815.03   68.99
  -1  -9  -5  693.88   66.85
  -1   9  -5  687.54   67.79
   1  -9   5  729.18   66.12
   1  -9   5  691.49   68.82
   1   9   5  704.52   77.88
  -1   9  -5  878.65   90.97
  -1   9  -5  765.76   85.96
  -1   9  -5  765.35   66.14
  -1   9  -5  631.14   73.16
  -1   9  -6  133.55   18.24
  -1   9  -6  130.59   17.48
   1  -9   6  141.50   21.23
  -1   9  -6  141.19   16.74
  -1   9  -6  114.88   21.76
  -1   9  -6  128.64   28.12
  -1  -9  -6  125.52   17.21
  -1   9  -6  118.36   17.84
   1  -9   6  157.11   20.64
   1  -9   6  137.99   16.82
  -1   9  -6  169.18   34.29
   1   9   6  117.14   24.16
   1  -9   6  138.20   16.99
  -1   9  -6  142.10   18.96
  -1   9  -7   50.89   18.99
   1   9   7   32.40   12.35
  -1  -9  -7   51.12   15.32
   1  -9   7   41.78   10.25
  -1   9  -7   31.99    8.25
   1  -9   7   46.69   11.22
  -1   9  -7   47.19    8.09
  -1   9  -7   33.34   13.44
  -1   9  -7   32.98   11.26
  -1  -9  -7   56.74    9.76
  -1   9  -7   55.38   10.17
  -1   9  -7   37.56    8.60
   1  -9   7   35.04    7.53
   1  -9   7   29.12    7.18
   1  -9   8  203.29   22.27
   1  -9   8  203.20   26.04
  -1   9  -8  195.82   23.59
  -1  -9  -8  201.43   22.76
  -1   9  -8  185.20   22.77
   1   9   8  162.32   26.92
   1   9   8  195.49   32.47
  -1  -9  -8  200.65   32.26
  -1   9  -8  190.53   23.79
   1  -9   8  204.31   21.94
  -1   9  -8  226.61   23.33
  -1   9  -8  152.18   29.91
  -1   9  -8  156.42   27.52
  -1   9  -8  179.56   20.96
   1  -9   9   70.75   10.18
  -1   9  -9   66.46   11.71
  -1   9  -9   51.41   10.22
   1  -9   9   75.19   13.78
  -1   9  -9   63.99   10.55
  -1   9  -9   52.77   10.59
   1  -9   9   65.67   10.37
  -1   9 -10  139.83   17.06
   1  -9  10  121.30   14.68
   1  -9  10  124.44   16.71
  -1   9 -10  110.35   15.79
  -1   9 -10  106.62   15.21
   1  -9  10  130.69   15.59
  -1  -9 -11  373.31   35.58
  -1   9 -11  419.62   37.35
   1  -9  11  401.05   36.30
   1  -9  11  411.50   35.39
  -1   9 -11  322.17   36.20
   1  -9  11  336.35   36.52
  -1   9 -11  372.58   37.74
   1  -9  12   16.97    3.99
   1  -9  12   14.66    4.21
  -1  -9 -12   15.81    3.72
  -1   9 -12   16.60    4.73
  -1   9 -12   16.14    4.17
  -1   9 -12   13.61    4.28
  -1   9 -13  100.51    9.63
   1  -9  13   77.04    8.92
   1 -10 -13   80.46    8.38
   1  10 -12    7.12    3.72
   1 -10 -12    3.71    2.59
   1  10 -12    5.05    2.52
   1 -10 -11  268.61   24.01
   1  10 -11  208.65   23.53
  -1 -10  11  245.28   23.50
  -1 -10  11  194.67   24.06
  -1 -10  10   -1.08    3.24
   1  10 -10    2.85    3.34
   1 -10 -10    1.60    3.18
  -1 -10  10   -0.81    2.84
   1  10 -10    0.91    3.50
   1  10 -10    1.70    3.00
  -1 -10   9   58.48   11.04
   1  10  -9   49.61    9.56
   1  10  -9   66.67   10.96
  -1 -10   9   42.74    8.96
   1  10  -9   60.74   10.10
   1 -10  -9   53.02    9.46
  -1 -10   8    9.50    5.03
   1  10  -8    8.97    4.80
  -1 -10   8    6.07    4.06
   1 -10  -8    3.92    3.51
   1  10  -8    4.45    3.79
   1  10  -8   16.57    5.19
   1  10  -8   13.72    5.17
  -1 -10   7    4.58    5.15
   1  10  -7    8.60    4.15
  -1  10   7    4.55    5.42
  -1 -10   7    9.15    5.97
   1  10  -7    6.84    8.13
   1  10  -7    7.66    6.66
   1 -10  -7    1.00    3.55
  -1 -10   7   15.71   10.22
  -1  10   7    3.05    6.50
   1  10  -7    4.34    6.54
   1  10  -7   11.23    5.22
  -1 -10   7    8.42    4.21
   1  10  -7   12.77    5.39
   1  10  -7    8.88    4.35
   1  10  -6  124.70   16.64
  -1  10   6  136.55   22.54
  -1 -10   6  149.86   23.07
   1  10  -6  133.52   27.37
   1  10  -6  143.80   23.84
   1 -10  -6  120.29   16.28
  -1 -10   6  119.32   19.07
   1  10  -6  115.88   26.96
  -1  10   6  146.88   25.76
  -1 -10   6   87.86   23.40
   1  10  -6  127.09   17.40
  -1 -10   6  130.52   17.02
  -1 -10   5 1032.26   87.27
  -1  10   5  936.95   86.97
   1  10  -5 1004.96   89.10
  -1  10   5  690.06   75.75
   1 -10  -5  848.53   76.98
  -1 -10   5  927.63   81.93
   1  10  -5  816.08   93.36
  -1 -10   5  677.84   87.91
  -1  10   5  955.59   90.45
  -1 -10   5  930.18   78.45
  -1 -10   4    4.11    3.82
   1  10  -4    3.31    8.63
   1  10  -4   14.00    7.02
  -1  10   4   10.90    4.12
   1 -10  -4    3.47    3.72
  -1 -10   4   10.52    6.20
   1  10  -4    3.37    6.21
  -1 -10   4    8.06    3.74
  -1  10   3 2107.96  170.46
  -1 -10   3 1893.57  176.75
   1  10  -3 1658.79  180.49
   1  10  -3 2095.86  185.46
  -1  10   2  424.66   40.41
  -1  10   2  407.71   39.53
   1  10  -2  481.52   53.46
  -1 -10   2  439.13   46.89
   1 -10  -2  360.77   40.06
  -1 -10   2  468.66   43.94
  -1 -10   1  447.05   43.03
  -1  10   1  467.04   42.53
  -1 -10   1  451.00   45.21
   1 -10  -1  449.73   43.96
  -1 -10   1  471.86   50.95
  -1  10   1  414.46   48.47
   1  10  -1  397.66   50.98
  -1 -10   0    2.29    3.84
   1 -10   0    2.22    3.90
  -1 -10   0    2.38    5.64
  -1 -10   0   -0.88    3.24
  -1  10   0    2.21    4.70
   1  10   0    2.06    4.37
  -1  10   0   -1.54    3.47
  -1  10  -1 1835.83  163.12
   1  10   1 1544.85  155.08
  -1 -10  -1 1731.16  150.99
  -1  10  -1 1696.85  149.91
  -1 -10  -1 1764.22  152.12
  -1  10  -1 1687.25  161.20
  -1  10  -1 1975.39  152.30
  -1  10  -1 1720.29  152.00
  -1  10  -2   54.68    9.55
  -1  10  -2   56.42    9.75
  -1 -10  -2   53.62    9.96
  -1  10  -2   50.19    8.68
  -1  10  -2   65.51   16.76
  -1  10  -2   63.59   14.27
  -1 -10  -2   61.16   10.03
   1 -10   2   54.21   10.95
  -1  10  -2   52.41   14.57
  -1  10  -2   59.89   10.75
  -1  10  -3  505.68   44.38
   1 -10   3  476.75   48.62
  -1  10  -3  441.10   51.68
  -1  10  -3  513.01   60.45
   1 -10   3  369.24   44.21
  -1 -10  -3  474.04   45.14
  -1  10  -3  471.29   46.57
  -1  10  -3  486.43   45.34
  -1  10  -3  486.09   58.67
  -1  10  -4   19.02    9.90
   1 -10   4    6.55    4.62
  -1  10  -4    4.74    5.64
  -1 -10  -4    9.25    4.78
  -1  10  -4    4.20    2.98
   1 -10   4    2.35    3.33
   1 -10   4    5.18    3.08
  -1  10  -4   11.51    4.92
   1 -10   4    6.70    3.69
   1 -10   5   56.85    9.39
  -1  10  -5   43.60    9.26
   1 -10   5   42.83    8.76
  -1  10  -5   55.36   10.95
  -1 -10  -5   58.80   10.49
   1 -10   5   42.92   10.19
  -1  10  -5   60.18   11.23
  -1  10  -5   63.24   19.96
  -1  10  -5   54.71   13.86
  -1  10  -5   63.56   18.67
   1 -10   6  108.96   15.04
  -1  10  -6  116.11   16.31
   1 -10   6  131.26   16.01
  -1  10  -6  130.99   18.03
  -1 -10  -6  119.86   16.32
   1 -10   6  102.03   16.98
  -1  10  -6  138.63   17.72
  -1  10  -6   90.33   25.41
  -1  10  -6  132.95   26.91
  -1  10  -6   94.32   19.86
   1 -10   7 1008.79  104.46
   1 -10   7 1180.25  102.69
  -1  10  -7 1132.34  103.73
   1 -10   7 1254.10  102.81
  -1 -10  -7 1118.62  102.71
  -1  10  -7 1305.67  107.59
  -1  10  -7 1255.01  104.46
  -1 -10  -7 1127.41  114.75
  -1  10  -7 1023.95  116.48
  -1  10  -7 1045.71  111.44
  -1 -10  -8   12.38    5.37
  -1  10  -8    6.65    4.87
   1 -10   8    2.61    3.23
   1 -10   8    5.63    3.89
   1 -10   8    4.26    4.79
  -1  10  -8    5.81    6.73
   1 -10   8    7.08    5.64
  -1  10  -8    7.88    4.21
  -1 -10  -9   10.09    4.73
  -1  10  -9    7.96    4.49
   1 -10   9    0.86    3.05
  -1  10  -9    2.20    3.89
   1 -10   9    3.04    3.13
  -1  10  -9    3.40    2.86
   1 -10   9    5.68    4.01
   1 -10   9   -1.30    4.36
   1 -10   9    1.15    3.87
  -1  10  -9   11.59    6.56
   1 -10  10   58.74    8.23
  -1  10 -10   45.02    8.88
   1 -10  10   51.42   10.03
   1 -10  10   36.58    8.26
   1 -10  10   54.65    8.44
  -1  10 -10   53.74    8.87
  -1  10 -11   45.70    7.06
   1 -10  11   42.73    7.34
  -1  10 -11   28.79    6.33
  -1 -10 -12   38.14    4.66
   1 -10  12   16.94    3.96
  -1  10 -12   20.68    4.63
  -1  10 -12   33.75    4.96
   1  11 -12  235.77   20.06
  -1 -11  12  178.46   19.62
   1  11 -12  193.77   18.93
   1 -11 -12  229.17   19.36
   1 -11 -11   56.15    7.57
  -1 -11  11   67.15    8.23
   1  11 -11   47.11    7.67
   1  11 -11   60.41    8.33
   1  11 -11   64.71    9.07
  -1 -11  11   43.99    7.77
   1  11 -10   15.36    4.68
   1  11 -10   24.13    5.53
  -1 -11  10   20.21    4.80
   1 -11 -10   22.95    5.57
  -1 -11  10   16.92    5.17
   1  11  -9   17.19    5.23
   1  11  -9   18.62    5.97
  -1 -11   9   18.08    5.32
   1 -11  -9   19.22    5.39
  -1 -11   9   22.28    6.36
  -1 -11   8   28.28    7.49
   1 -11  -8   30.19    6.87
   1  11  -8   26.00    7.04
  -1 -11   8   28.15    6.65
   1  11  -8   18.87    6.41
   1  11  -8   26.78    6.27
  -1 -11   8   22.49    6.98
   1  11  -7  785.31   75.59
  -1 -11   7  872.46   78.45
   1 -11  -7  749.50   74.47
   1  11  -7  864.55   76.63
  -1 -11   7  957.83   76.71
   1  11  -7  809.20   75.21
   1 -11  -6  215.64   23.58
  -1 -11   6  182.78   25.41
   1  11  -6  164.68   28.85
  -1 -11   6  259.65   25.32
  -1 -11   5    2.24    4.12
  -1  11   5   -2.19    3.28
   1  11  -5    6.50    9.76
   1  11  -5    2.56    2.72
  -1  11   5    4.45    2.99
   1 -11  -5    0.91    3.19
  -1 -11   5    4.49    5.03
   1  11  -5    3.62    3.84
  -1 -11   5    4.32    3.98
  -1 -11   4   89.96   16.59
  -1  11   4   72.10   14.81
   1  11  -4   55.15   14.49
   1  11  -4   88.29   19.88
  -1  11   4   43.18    9.00
   1 -11  -4   64.74   10.03
   1  11  -4   78.68   18.78
  -1 -11   4   63.71   11.03
  -1 -11   3  244.84   30.44
  -1  11   3  300.74   29.02
  -1 -11   3  242.16   34.05
   1  11  -3  286.95   39.83
  -1  11   2   40.25    7.98
  -1 -11   2   69.37   11.90
   1 -11  -2   35.94    8.03
   1  11  -2   53.84   14.46
  -1  11   1  778.26   67.61
  -1 -11   1  715.63   69.03
   1 -11  -1  673.41   67.63
   1  11  -1  698.40   75.83
  -1  11   1  776.31   66.74
  -1 -11   0   30.79   10.65
   1  11   0   26.43    9.72
  -1  11   0   29.56    6.41
  -1  11   0   35.12   10.96
  -1 -11   0   24.98    7.56
   1 -11   0   24.46    6.88
  -1 -11   0   39.45    7.73
  -1  11   0   32.14    7.30
  -1  11  -1  270.67   32.79
  -1  11  -1  333.37   33.77
  -1  11  -1  354.98   32.81
   1 -11   1  310.20   34.73
  -1 -11  -1  348.30   34.56
  -1 -11  -1  354.19   44.38
  -1  11  -1  276.86   40.25
  -1 -11  -1  341.52   33.68
  -1  11  -2  400.89   38.65
  -1  11  -2  355.53   37.39
  -1  11  -2  368.43   36.35
   1 -11   2  334.81   38.82
  -1  11  -2  344.75   46.85
  -1 -11  -2  422.42   50.11
  -1  11  -2  370.47   44.73
  -1  11  -2  347.56   47.10
  -1 -11  -2  400.83   38.00
  -1  11  -3  698.49   64.37
   1 -11   3  695.59   63.15
  -1  11  -3  708.58   77.60
  -1 -11  -3  756.90   77.01
  -1  11  -3  702.64   62.28
   1 -11   3  725.14   66.19
  -1  11  -3  695.20   63.36
   1 -11   3  559.00   61.95
  -1 -11  -3  696.72   63.37
  -1  11  -3  626.11   70.40
  -1  11  -3  682.20   76.22
  -1 -11  -4  231.54   25.73
  -1  11  -4  243.33   24.96
  -1  11  -4  208.70   26.27
   1 -11   4  226.71   25.28
  -1  11  -4  200.51   35.65
  -1 -11  -4  243.69   36.51
   1 -11   4  223.63   25.92
  -1  11  -4  239.31   26.67
  -1  11  -4  209.06   26.83
  -1  11  -4  240.66   33.27
  -1  11  -4  271.82   38.89
  -1 -11  -5  520.51   46.04
  -1  11  -5  461.32   44.97
  -1  11  -5  468.44   44.39
  -1  11  -5  499.34   47.11
   1 -11   5  474.75   44.85
  -1  11  -5  365.12   56.68
  -1 -11  -5  499.25   57.63
   1 -11   5  373.73   44.95
  -1  11  -5  473.98   46.74
  -1  11  -5  397.21   51.95
  -1  11  -5  497.05   47.15
  -1  11  -6   59.13   10.47
  -1 -11  -6   64.34   11.12
   1 -11   6   55.76   10.04
  -1  11  -6   67.19   11.79
  -1  11  -6   66.30   10.21
  -1  11  -6   82.58   12.69
   1 -11   6   78.38   13.98
  -1  11  -6   65.57   12.38
   1 -11   6   63.62   12.01
  -1  11  -7    6.75    3.85
  -1  11  -7    4.76    4.90
   1 -11   7    3.49    2.80
   1 -11   7   -1.27    4.26
  -1  11  -7   11.58    6.56
   1 -11   7    1.40    5.37
  -1  11  -7    5.11    3.15
  -1  11  -7    2.12    3.90
  -1 -11  -7   11.29    5.10
  -1  11  -8  410.07   38.45
  -1  11  -8  405.67   39.64
   1 -11   8  404.39   38.37
   1 -11   8  370.54   40.58
  -1  11  -8  433.65   41.84
  -1 -11  -8  405.83   39.04
   1 -11   8  389.32   40.95
  -1  11  -8  390.67   39.24
  -1 -11  -9   93.88   11.58
  -1  11  -9   67.79   10.18
  -1  11  -9   89.27   11.11
   1 -11   9   78.29   12.62
  -1  11  -9   96.93   13.54
   1 -11   9   83.67   12.55
  -1  11  -9   75.53   12.01
   1 -11   9   82.43   10.63
   1 -11  10   99.88   11.09
  -1  11 -10   88.14   12.45
  -1 -11 -10   94.32   11.53
  -1  11 -10  117.74   13.76
  -1  11 -10  101.33   11.29
   1 -11  10   86.10   12.35
   1 -11  11   45.13    6.82
  -1  11 -11   47.32    6.87
   1  12 -11   28.41    4.53
   1  12 -11   32.70    4.11
   1 -12 -11   22.31    3.19
   1  12 -11   23.79    3.70
  -1 -12  11   27.72    3.68
   1  12 -10   95.49   11.76
  -1 -12  10  109.36   11.68
   1 -12 -10   87.53   10.77
   1  12 -10  103.06   12.54
   1  12 -10  114.48   12.00
  -1 -12  10   83.47   11.54
  -1 -12   9   21.54    5.66
   1 -12  -9   31.95    5.82
   1  12  -9   33.50    7.24
   1  12  -9   42.99    6.89
   1  12  -9   26.02    6.12
  -1 -12   9   25.34    5.46
  -1 -12   8  949.05   81.74
   1  12  -8  942.35   82.37
  -1 -12   8  760.88   81.67
   1 -12  -8  938.31   80.88
   1  12  -8  936.38   81.66
   1  12  -8  999.44   81.22
  -1 -12   8  883.42   82.34
  -1 -12   7    5.80    4.60
   1 -12  -7   -5.36    4.22
   1  12  -7    2.65    2.81
   1  12  -7   -0.87    3.05
  -1 -12   7    2.76    3.52
  -1 -12   6   46.57   10.17
   1 -12  -6   38.66    7.99
   1  12  -6   52.56    8.94
   1  12  -6   50.70    9.34
  -1 -12   6   47.19    9.11
   1 -12  -5   75.45   10.50
  -1 -12   5   65.20   11.18
   1  12  -5   75.38   11.68
  -1  12   5   46.85    8.93
  -1 -12   5   73.35   12.85
   1 -12  -4  423.69   39.40
  -1  12   4  383.20   39.36
   1  12  -4  435.52   41.27
  -1 -12   4  389.26   40.60
  -1 -12   3  252.87   29.51
   1  12  -3  249.41   35.93
  -1  12   3  269.25   27.32
  -1 -12   3  242.19   27.74
   1  12  -2  262.16   38.14
  -1 -12   2  333.63   34.00
   1 -12  -2  272.39   31.06
  -1  12   2  337.39   31.80
   1 -12  -1   94.85   14.60
  -1 -12   1  106.76   16.03
  -1  12   1  116.41   15.29
   1  12  -1   74.10   17.40
  -1  12   0  154.43   17.64
  -1  12   0  153.72   18.93
  -1  12   0  167.52   19.01
   1 -12   0  123.08   18.41
  -1 -12   0  146.34   19.48
   1 -12   1  264.60   30.01
  -1  12  -1  288.26   28.11
  -1 -12  -1  282.44   29.01
  -1  12  -1  260.52   35.08
  -1  12  -1  250.68   27.98
  -1  12  -1  263.72   28.85
   1 -12   2    5.29    4.52
  -1 -12  -2   12.84    4.99
  -1 -12  -2   10.59    7.99
  -1  12  -2   14.02    7.06
  -1  12  -2    7.95    7.49
  -1  12  -2   12.60    4.45
  -1  12  -2    7.09    3.97
  -1  12  -2   13.10    4.85
  -1  12  -3   50.86    9.41
   1 -12   3   40.62    8.30
  -1  12  -3   55.16    9.15
   1 -12   3   39.99    9.91
  -1  12  -3   67.12   14.89
  -1  12  -3   44.14    8.01
  -1  12  -3   22.88   10.77
  -1 -12  -3   49.86    9.17
  -1  12  -3   53.77   10.69
  -1 -12  -3   54.41   15.21
  -1  12  -4  186.82   20.06
  -1 -12  -4  158.21   20.32
  -1  12  -4  167.15   20.66
   1 -12   4  169.95   22.66
  -1  12  -4  181.81   22.61
   1 -12   4  178.46   20.57
  -1  12  -4  181.02   21.54
   1 -12   5    3.69    3.10
  -1  12  -5    2.23    4.59
  -1 -12  -5    0.96    3.52
  -1  12  -5   -0.82    1.95
  -1  12  -5    1.06    4.21
  -1  12  -5    1.18    3.95
  -1  12  -6  301.84   31.70
  -1 -12  -6  326.79   32.93
   1 -12   6  338.60   35.66
  -1  12  -6  335.82   34.27
  -1  12  -6  272.77   32.97
   1 -12   6  366.01   33.10
  -1  12  -6  346.27   34.36
  -1  12  -7   90.41   11.71
  -1 -12  -7  100.24   12.92
  -1  12  -7   93.06   13.29
  -1  12  -7   88.17   13.44
   1 -12   7   75.44   13.56
   1 -12   7   99.39   12.34
  -1  12  -7   94.46   13.70
  -1  12  -8   23.83    4.89
  -1 -12  -8   24.86    5.69
  -1  12  -8   31.89    6.36
  -1  12  -8   22.57    6.42
   1 -12   8   28.32    7.12
   1 -12   8   24.95    5.12
  -1 -12  -9    4.40    2.83
   1 -12   9    6.98    3.51
  -1  12  -9    4.29    1.96
  -1  12  -9    6.67    3.79
   1 -12   9    3.13    2.15
  -1  12 -10   14.80    3.88
  -1  12 -10    8.54    3.54
   1 -12  10   13.86    3.57
  -1 -12 -10   11.66    3.03
   1  13 -10    6.26    2.30
  -1 -13  10    3.00    1.49
   1  13  -9   21.21    5.06
   1 -13  -9   16.98    3.39
   1  13  -9   24.69    4.97
  -1 -13   9   11.88    3.49
   1 -13  -8   23.15    4.57
   1  13  -8   21.05    5.26
   1  13  -8   23.42    4.66
   1  13  -8   16.87    4.94
  -1 -13   8   23.72    4.97
   1 -13  -7    0.55    2.34
   1  13  -7    2.30    3.82
  -1 -13   7   -0.91    3.47
   1  13  -7    1.41    2.58
  -1 -13   7    0.75    2.53
   1 -13  -6  151.84   17.51
  -1 -13   6  172.43   20.68
   1  13  -6  184.68   19.62
   1  13  -6  164.58   19.32
  -1 -13   6  157.42   18.88
   1  13  -6  174.15   19.53
  -1 -13   5   -1.87    2.98
   1  13  -5   -0.93    3.26
   1  13  -5    2.38    3.37
  -1 -13   5    1.15    3.67
   1 -13  -5    3.78    2.76
   1  13  -4  134.00   16.03
  -1 -13   4  124.61   15.98
  -1  13   4  102.13   13.82
  -1 -13   3    5.10    3.77
   1  13  -3    4.69    3.87
  -1 -13   3    4.78    3.38
  -1 -13   3    1.21    4.07
  -1  13   3   10.42    4.28
  -1  13   3    3.21    2.85
   1  13  -2    6.36    4.00
   1 -13  -2    3.46    2.93
  -1 -13   2    3.56    4.56
  -1  13   2    5.74    3.68
  -1  13   2    6.01    3.31
   1  13  -1    6.02    3.42
  -1 -13   1    2.30    3.45
   1 -13  -1    3.93    3.46
  -1  13   1    3.83    3.37
  -1  13   1    0.90    2.54
  -1  13   0  142.41   18.81
   1 -13   0  165.72   20.21
  -1  13   0  185.04   19.90
  -1  13  -1    1.93    2.72
  -1  13  -1    4.60    3.25
  -1  13  -1    2.94    2.72
   1 -13   1    9.20    4.89
  -1  13  -2  502.23   48.71
   1 -13   2  506.81   49.94
   1 -13   2  549.53   52.11
  -1 -13  -2  578.65   50.37
  -1 -13  -3    1.76    2.95
  -1  13  -3   -0.73    1.89
   1 -13   3    1.23    3.45
  -1  13  -3    0.89    2.66
   1 -13   3    0.90    2.54
  -1  13  -3   -0.83    4.73
  -1 -13  -4  423.38   41.29
  -1  13  -4  469.57   40.66
   1 -13   4  447.47   43.81
  -1  13  -4  403.18   40.62
   1 -13   4  450.50   41.51
  -1  13  -4  384.37   41.12
  -1  13  -4  428.80   42.76
  -1  13  -5    4.02    4.40
  -1  13  -5    1.79    3.03
   1 -13   5    7.05    3.24
  -1 -13  -5    4.82    3.83
  -1  13  -5    5.63    3.83
   1 -13   5    3.48    5.08
  -1  13  -5    2.60    2.31
  -1  13  -6    7.06    4.09
  -1  13  -6   -0.85    3.93
   1 -13   6    2.05    2.30
  -1 -13  -6    4.37    3.46
  -1  13  -6   -0.79    3.55
  -1  13  -6    5.73    2.66
  -1  13  -7    4.17    2.26
  -1  13  -7    6.49    3.94
  -1  13  -7    7.55    3.79
   1 -13   7    6.12    2.69
  -1  13  -7    9.34    4.00
   1 -13   7    3.53    3.29
  -1  13  -7    9.57    3.86
  -1 -13  -7   11.28    3.97
   1 -13   8 1005.94   84.59
  -1  13  -8 1002.02   86.13
  -1  13  -8 1011.90   86.09
   1 -13   8  944.97   86.11
  -1  13  -8  888.73   84.66
  -1 -13  -8 1093.32   85.61
   1 -13   9    0.81    0.81
  -1  13  -9    2.64    2.39
  -1 -13  -9    2.85    2.17
   1  14  -9   20.64    3.44
  -1 -14   9   22.29    3.17
  -1  14   8  615.88   17.80
  -1 -14   8  646.67   19.99
   1  14  -7   14.61    3.82
  -1 -14   7   19.96    4.14
   1  14  -7   15.82    3.77
  -1  14   7   14.41    3.32
  -1 -14   6   20.83    4.66
   1  14  -6   23.94    5.01
  -1 -14   6    3.39    2.62
  -1 -14   6   13.48    4.58
  -1  14   6   13.86    4.75
   1  14  -6   23.39    4.99
  -1  14   6   20.14    4.25
   1  14  -5  105.52   11.57
  -1 -14   5  100.11   10.94
  -1  14   5   69.93    9.05
   1  14  -5   77.54    9.95
  -1 -14   4  266.81   26.52
   1  14  -4  206.43   22.75
  -1 -14   4  256.05   25.18
  -1  14   4  217.02   23.82
   1  14  -4  263.97   24.86
  -1 -14   3  167.15   19.54
  -1  14   3  127.79   16.34
   1  14  -3  165.13   17.96
  -1  14   3  176.31   18.20
  -1 -14   3  167.32   18.83
  -1  14   2  274.56   32.15
  -1 -14   2  349.53   33.93
   1  14  -2  352.19   32.83
  -1  14   2  381.75   33.41
  -1  14   1   92.21   12.06
   1 -14  -1   83.21   12.05
  -1  14   1   94.24   12.71
  -1  14   1   90.58   11.88
  -1  14   0  140.32   16.49
   1 -14   0  146.90   17.58
  -1  14   0  152.11   17.75
  -1  14   0  133.73   16.41
   1 -14   1  124.67   16.24
   1 -14   1  130.24   17.45
  -1  14  -1  150.70   17.83
  -1  14  -1  170.85   17.57
   1 -14   2    0.78    2.48
  -1  14  -2    0.81    2.45
  -1  14  -2   -0.77    4.89
  -1  14  -2    4.76    3.91
   1 -14   2    3.99    4.11
   1 -14   3   -0.73    2.58
  -1 -14  -3    1.62    1.90
  -1  14  -3    3.21    2.82
   1 -14   3    1.00    3.83
   1 -14   4  147.05   16.44
   1 -14   4  137.69   17.83
  -1  14  -4  153.52   17.85
   1 -14   5    5.30    3.99
   1 -14   5    3.44    2.52
  -1 -14  -5    4.11    2.93
  -1  14  -5    0.78    2.98
   1 -14   6  224.45   22.81
  -1  14  -6  235.94   24.25
  -1 -14  -6  262.73   23.63
   1 -14   7   75.90   10.05
  -1  14  -7   81.63    9.34
   1 -14   7   79.81   10.14
  -1 -14  -7   83.89    9.31
   1 -14   7   73.00    8.46
  -1  14  -8    1.61    1.26
  -1  14  -8    4.93    1.92
   1 -14   8    4.46    1.99
   1  15  -7  234.13   23.36
  -1 -15   7  285.28   23.57
  -1 -15   6  122.91   12.07
   1  15  -6  102.54   11.66
   1  15  -6  105.25   11.71
  -1 -15   5    7.16    2.95
  -1  15   5    4.96    3.93
   1  15  -5    9.63    3.28
  -1  15   5    9.13    2.37
   1  15  -4   74.14    9.41
  -1 -15   4   60.03    8.32
  -1  15   4   51.74    7.09
   1  15  -3   65.81    9.83
  -1  15   3   79.83   10.71
  -1 -15   3   62.46    9.39
  -1  15   3   73.21    8.68
  -1  15   2   45.90    8.11
  -1 -15   2   38.74    6.99
  -1  15   1  275.41   25.73
  -1  15   1  216.45   23.01
   1 -15  -1  249.92   24.13
  -1 -15   1  240.95   24.52
  -1  15   0   15.11    4.54
  -1  15   0   18.63    6.00
  -1 -15   0   11.09    4.04
   1 -15   0   14.05    3.99
  -1  15   0   11.44    3.35
  -1  15  -1   75.49   10.14
  -1  15  -1   72.45   10.15
   1 -15   1   58.92    9.78
   1 -15   1   70.39    9.32
  -1  15  -1   63.98    8.88
  -1  15  -2  230.92   22.42
  -1  15  -2  278.05   24.28
   1 -15   2  243.48   23.88
  -1 -15  -2  176.02   21.19
   1 -15   2  233.39   22.60
  -1  15  -2  247.54   22.81
   1 -15   3  320.77   29.22
  -1  15  -3  295.99   29.20
   1 -15   3  313.83   30.60
  -1  15  -4   55.53    8.11
   1 -15   4   44.86    6.54
  -1  15  -4   52.02    7.25
   1 -15   4   55.09    8.27
  -1  15  -5  193.53   15.68
   1 -15   5  179.53   15.82
   1 -15   5  143.29   13.25
  -1  15  -6    8.80    2.28
  -1  16   5  115.37   12.80
  -1 -16   5  160.22   13.07
   1  16  -4    2.85    1.82
   1 -16  -4    1.47    1.12
  -1 -16   4    3.85    1.61
   1  16  -3  407.93   32.53
  -1  16   3  356.46   32.27
   1 -16  -3  307.96   31.04
  -1 -16   3  369.55   31.90
  -1  16   2  208.49   20.53
   1 -16  -2  181.11   19.29
  -1 -16   2  248.92   20.55
   1  16  -1   45.08    6.61
   1  16  -1   42.74    6.62
  -1  16   1   58.76    7.59
  -1 -16   1   50.08    6.79
   1 -16  -1   51.02    6.39
   1  16   0   10.45    3.01
  -1  16   0   11.09    3.67
  -1 -16   0    7.44    2.31
   1 -16   0    8.22    2.62
  -1 -16   0    9.83    3.16
   1 -16   1  300.75   26.75
  -1  16  -1  281.17   26.66
  -1  16  -1  303.46   27.42
   1 -16   2    9.76    2.22
  -1  16  -2    7.98    2.81
   1 -16   3   58.33    6.22
  -1  16  -4    7.66    2.15
  -2   0  16   67.00    8.65
  -2   0  16   70.01    8.71
  -2   0  15   -3.76    4.39
  -2   0  14   98.50   14.41
  -2   0  13    1.39    6.10
  -2   0  13    4.35    3.28
   2   0 -13    2.16    2.76
  -2   0  12  283.53   39.27
  -2   0  12  435.54   41.35
   2   0 -12  312.45   40.62
  -2   0  12  387.07   37.02
   2   0 -12  330.04   34.11
  -2   0  11   -2.10    3.15
  -2   0  11    1.18    3.05
   2   0 -11    0.89    2.32
  -2   0  11    5.43    6.92
   2   0 -11   -2.13    3.19
  -2   0  10  397.13   55.84
   2   0 -10  505.28   51.90
  -2   0  10  542.61   52.96
   2   0 -10  385.69   43.78
  -2   0  10  590.48   47.68
  -2   0   9   -1.76    3.23
  -2   0   9    3.26    5.99
  -2   0   9    0.99    2.57
  -2   0   8 2488.00  245.12
  -2   0   8 2988.23  245.74
  -2   0   7   -2.63    6.23
  -2   0   7    4.63    4.25
  -2   0   6  327.23   43.07
  -2   0   6  435.68   45.12
  -2   0   5   -1.58    5.54
  -2   0   5   10.43    5.83
   2   0  -4 5422.81  437.67
  -2   0   4 4804.46  441.92
   2   0  -3    0.96    1.17
  -2   0   3    5.84    4.34
  -2   0   2 1233.30  115.85
  -2   0   2 1301.87  113.89
  -2   0   2 1103.66  115.45
   2   0  -2 1393.31  111.57
  -2   0   1    2.64    2.11
  -2   0   1    5.88    3.90
  -2   0   1    3.23    1.87
  -2   0   1    0.23    1.09
  -2   0   0  494.95   44.36
  -2   0   0  469.62   44.67
  -2   0   0  443.20   41.71
  -2   0   0  595.04   45.50
  -2   0  -1   -1.68    3.46
  -2   0  -1   -1.39    3.53
  -2   0  -1    4.69    2.54
  -2   0  -2  140.49   20.30
  -2   0  -2  167.74   21.26
  -2   0  -2  207.01   19.72
  -2   0  -2  179.56   18.78
  -2   0  -3   -1.18    3.31
  -2   0  -3    3.41    6.53
  -2   0  -3    0.71    3.18
  -2   0  -3    1.65    2.62
  -2   0  -4 3420.58  293.61
  -2   0  -4 2757.14  297.91
  -2   0  -4 3757.75  289.41
  -2   0  -4 3328.07  290.94
  -2   0  -5    1.59    2.93
   2   0   5    1.30    1.69
  -2   0  -5   -3.38    9.50
  -2   0  -5    1.23    2.62
  -2   0  -6  221.54   28.70
   2   0   6  233.32   23.69
  -2   0  -6  225.90   40.24
  -2   0  -6  216.94   27.46
  -2   0  -7    1.77    3.26
  -2   0  -7    1.74    3.21
  -2   0  -7   -4.96    9.12
  -2   0  -8 2100.42  173.24
  -2   0  -8 1925.40  174.58
  -2   0  -8 1923.90  180.84
  -2   0  -8 1991.95  174.09
  -2   0  -9    1.79    2.68
  -2   0  -9    2.05    3.08
  -2   0  -9    5.53   13.12
  -2   0  -9   -2.28    4.19
  -2   0 -10  250.48   29.29
  -2   0 -10  292.16   37.81
  -2   0 -11    2.49    4.58
  -2   0 -11    4.92    5.23
  -2   0 -11    6.62    4.55
  -2   0 -11    2.13    3.59
  -2   0 -12  232.96   25.11
  -2   0 -12  221.03   24.96
  -2   0 -13   -0.72    2.43
  -2   0 -13    5.06    4.80
  -2   0 -14   17.62    3.93
  -2   0 -14   30.14    6.24
  -2   0 -15    1.03    1.90
   2   0  15   -1.41    2.27
  -2   1  16   21.76    4.38
  -2  -1  16   17.43    4.26
  -2   1  16   30.24    4.22
  -2  -1  16   14.62    3.98
  -2   1  15   84.20   12.22
  -2  -1  15   92.77   12.38
   2   1 -14   86.24   11.01
  -2  -1  14   95.72   14.44
   2   1 -13   17.25    5.10
  -2  -1  13   22.92    6.49
  -2  -1  13   36.94    9.35
  -2   1  12  315.05   38.55
   2   1 -12  263.10   31.01
  -2  -1  12  316.60   33.15
  -2   1  12  338.80   33.84
   2   1 -12  310.55   30.79
  -2  -1  12  379.50   38.05
   2   1 -12  331.43   39.28
   2  -1 -12  244.03   35.54
  -2   1  11  193.99   27.64
  -2  -1  11  173.70   25.54
   2   1 -11  141.76   20.01
  -2   1  11  206.10   22.85
  -2  -1  11  173.02   21.78
   2   1 -11  169.14   19.83
  -2   1  11  196.58   34.31
   2   1 -11  182.20   26.64
   2  -1 -11  216.68   27.74
  -2  -1  11  205.65   26.80
   2  -1 -10  175.44   24.26
  -2  -1  10  128.93   24.59
  -2   1  10  160.79   31.64
  -2  -1  10  181.46   24.59
  -2  -1  10  181.44   20.52
  -2  -1  10  145.63   18.59
  -2   1  10  141.41   19.05
   2   1 -10  162.61   19.58
  -2  -1   9  167.20   24.17
  -2  -1   9  176.87   28.53
  -2   1   9  125.77   30.21
  -2  -1   9  188.27   31.66
  -2  -1   9  209.22   20.47
   2  -1  -9  194.53   25.43
  -2  -1   9  194.80   21.85
  -2   1   9  172.65   21.29
   2  -1  -8  410.94   38.26
  -2  -1   8  312.26   36.24
  -2  -1   8  306.17   40.55
  -2   1   8  257.86   45.22
  -2  -1   8  371.60   46.22
  -2  -1   7   33.24    8.22
  -2  -1   7   45.70   11.49
  -2   1   7   33.44   14.08
  -2  -1   7   41.28   13.10
   2   1  -6  790.85   68.12
  -2  -1   6  686.08   68.82
  -2   1   6  797.90   70.62
  -2  -1   6  731.36   72.09
  -2   1   6  678.71   78.36
  -2  -1   6  836.63   79.76
   2   1  -5  490.13   43.72
  -2  -1   5  469.51   45.02
  -2   1   5  511.19   46.27
  -2  -1   5  482.75   46.79
  -2   1   5  360.20   49.75
  -2  -1   5  505.66   53.40
   2   1  -4 2501.19  199.08
  -2  -1   4 2464.08  200.77
  -2  -1   4 1934.30  200.36
  -2   1   4 2362.22  205.99
  -2  -1   4 2782.27  209.49
  -2  -1   3   61.40    8.51
  -2   1   3   58.04    8.57
  -2   1   3   51.63    9.26
  -2   1   3   63.35   11.19
   2   1  -3   75.08    7.60
  -2  -1   2   70.18    8.15
  -2   1   2   68.51    9.97
  -2  -1   2   74.53   10.91
  -2  -1   2   64.94    9.86
  -2  -1   1  619.47   56.60
  -2   1   1  668.53   56.45
  -2  -1   1  651.87   59.37
  -2  -1   1  688.98   58.82
  -2   1   0 9259.67  722.35
  -2   1   0 7683.05  721.71
  -2   1   0 9999.00  726.57
  -2  -1   0 9794.28  725.71
  -2  -1   0 9732.06  726.55
  -2  -1  -1   10.92    3.52
  -2   1  -1   11.65    3.01
  -2  -1  -1   10.42    5.37
  -2  -1  -2  277.21   28.14
  -2  -1  -2  293.18   31.18
  -2  -1  -2  302.08   31.13
  -2   1  -2  277.42   27.21
  -2  -1  -2  270.32   27.91
  -2   1  -2  287.20   32.06
  -2   1  -3   62.58   13.06
  -2  -1  -3   40.26    8.41
  -2  -1  -3   55.05    9.24
  -2   1  -3   65.49    9.11
  -2  -1  -3   48.06   11.92
  -2  -1  -4 1409.56  120.53
  -2   1  -4 1358.37  127.43
  -2  -1  -4 1305.15  129.22
   2  -1   4 1355.60  115.95
  -2   1  -4 1397.98  119.46
  -2   1  -4 1410.07  120.73
  -2  -1  -4 1365.04  121.21
  -2   1  -5  741.22   79.10
  -2  -1  -5  843.30   86.19
  -2  -1  -5  805.38   73.12
  -2   1  -5  717.89   71.75
  -2   1  -5  817.10   70.06
  -2  -1  -5  746.48   71.10
  -2   1  -6   85.60   18.94
   2   1   6   98.65   13.73
  -2  -1  -6  126.32   28.15
  -2  -1  -6   74.99   14.53
  -2   1  -6  108.07   16.06
  -2  -1  -6  105.28   15.24
  -2   1  -7   55.36   15.90
  -2   1  -7   86.82   15.58
  -2  -1  -7   89.34   15.83
   2   1   7   92.11   13.28
  -2  -1  -8   62.62   10.14
  -2   1  -8   52.35    9.71
  -2  -1  -8   73.93   14.71
  -2   1  -8   70.87   14.69
  -2   1  -8   63.81   11.34
  -2   1  -8   48.10   13.87
  -2   1  -8   61.44    9.93
  -2   1  -9  366.10   36.89
  -2   1  -9  331.97   41.49
  -2  -1  -9  291.89   39.98
  -2   1  -9  297.44   33.67
  -2  -1  -9  463.52   61.24
  -2  -1  -9  357.67   35.16
  -2   1  -9  366.35   35.54
  -2   1 -10    5.58    3.57
  -2  -1 -10    4.22    3.19
  -2  -1 -10   -5.07   12.03
  -2  -1 -10    2.46    3.71
  -2   1 -10    9.89    6.95
  -2  -1 -10    4.23    3.57
  -2   1 -10    3.78    3.34
  -2  -1 -11    9.29   10.01
  -2  -1 -11   25.98    6.93
  -2   1 -11   23.08    6.72
  -2  -1 -11   14.49    5.44
  -2  -1 -11   27.23    9.63
  -2   1 -11   37.50   11.07
  -2  -1 -12   61.42   11.78
  -2  -1 -12   73.53   10.37
  -2   1 -12   39.47    8.91
  -2   1 -12   44.57    9.21
  -2  -1 -13    2.87    4.31
  -2   1 -13    1.59    3.78
  -2  -1 -13    6.36    3.58
  -2   1 -14  248.41   23.11
  -2  -1 -14  205.38   21.50
  -2  -1 -15   41.23    5.52
  -2  -2  16    5.17    2.24
  -2  -2  16    7.06    2.75
  -2   2  15   25.24    5.52
  -2  -2  15   14.51    5.05
  -2   2  15   12.26    4.34
  -2  -2  14  155.92   18.62
  -2   2  14  132.37   17.04
   2   2 -14  112.79   15.13
  -2  -2  14  183.39   18.42
   2   2 -13  762.40   67.82
  -2  -2  13  846.34   73.08
  -2   2  13  769.94   71.02
   2   2 -13  717.07   68.48
  -2  -2  13  722.48   69.68
   2   2 -12    9.02    5.87
  -2   2  12    2.25    3.38
   2   2 -12    6.02    3.42
  -2  -2  12    1.63    6.01
  -2   2  12    2.84    4.77
  -2   2  12    3.60    5.41
   2   2 -12    1.05    3.16
  -2  -2  12    3.55    4.17
  -2  -2  11  475.13   52.63
  -2   2  11  470.05   48.49
  -2  -2  11  501.72   48.69
  -2   2  11  561.91   52.58
  -2  -2  11  671.20   56.09
   2   2 -11  526.00   47.14
   2   2 -11  412.67   47.14
  -2   2  11  371.06   59.94
   2  -2 -11  491.42   53.84
  -2  -2  10  209.06   27.79
  -2  -2  10  209.29   23.50
  -2   2  10  216.73   24.80
  -2  -2  10  182.01   23.64
  -2  -2  10  270.41   30.80
  -2   2  10  234.89   28.40
  -2   2  10  220.88   38.87
  -2  -2  10  248.17   38.54
  -2  -2  10  215.70   22.75
   2   2 -10  186.85   22.34
   2  -2 -10  241.56   29.56
  -2   2   9  662.50   89.12
  -2  -2   9  809.41   89.21
   2  -2  -9  826.97   77.29
  -2  -2   9  855.18   71.24
  -2  -2   9  815.87   76.96
  -2   2   9  724.08   72.28
  -2  -2   8  839.74   94.51
  -2   2   8  952.53  110.85
  -2  -2   8 1287.29  112.36
   2   2  -8  978.19   93.47
   2  -2  -8 1158.45   95.83
  -2  -2   8 1097.14   95.60
  -2   2   8 1055.66   97.63
  -2  -2   7  423.67   50.30
  -2   2   7  414.34   61.92
  -2  -2   7  604.00   65.34
   2   2  -7  530.07   49.97
   2  -2  -7  583.32   51.24
  -2  -2   7  562.87   51.35
  -2   2   7  499.17   52.51
  -2  -2   6   45.74   14.76
  -2  -2   6   38.11    7.97
  -2   2   6   42.87   14.72
   2   2  -6   34.01    6.92
   2  -2  -6   30.93    6.87
  -2  -2   6   32.28    7.41
  -2   2   6   41.25    9.18
  -2  -2   5   69.11   11.33
  -2   2   5   89.74   19.67
  -2  -2   5   95.68   20.49
   2   2  -5   96.91   11.74
  -2  -2   5   97.45   12.71
   2  -2  -5   94.01   11.69
   2   2  -4 2903.05  232.40
  -2   2   4 2359.15  232.78
   2  -2  -4 3068.47  232.20
  -2  -2   4 2608.66  233.29
  -2  -2   3  466.59   41.15
  -2   2   3  422.59   41.16
   2  -2  -3  440.26   38.61
  -2   2   3  432.58   41.76
  -2  -2   3  482.20   47.88
  -2  -2   3  491.99   43.51
  -2   2   3  381.20   42.62
  -2   2   2  198.61   19.48
  -2  -2   2  180.46   19.14
  -2   2   2  181.64   20.86
  -2  -2   2  223.26   21.21
  -2   2   2  173.51   20.63
  -2   2   2  196.70   21.29
  -2  -2   2  186.20   21.41
  -2   2   2  219.42   22.98
  -2  -2   1  762.79   67.33
  -2   2   1  758.45   66.28
  -2  -2   1  776.41   69.12
  -2   2   1  773.96   68.49
  -2  -2   1  892.04   68.52
  -2   2   1  742.60   64.80
  -2   2   1  781.52   68.80
  -2  -2   1  789.94   68.34
  -2   2   1  782.31   68.56
  -2  -2   1  781.07   69.38
  -2   2   0  573.42   45.96
  -2  -2   0  549.84   48.32
  -2  -2   0  527.64   49.67
  -2   2   0  566.03   49.40
  -2  -2   0  588.89   49.22
  -2  -2   0  626.35   49.70
  -2   2   0  551.32   46.34
  -2   2   0  474.88   45.36
  -2  -2  -1 2441.66  184.31
  -2   2  -1 2079.45  182.52
  -2  -2  -1 2064.26  182.02
  -2   2  -1 2095.28  180.09
  -2   2  -2    5.32    4.92
  -2  -2  -2    4.82    4.95
  -2   2  -2    3.59    5.05
  -2   2  -2    4.04    4.42
  -2  -2  -2    5.73    4.71
  -2   2  -2    1.14    1.48
  -2  -2  -2   -0.85    2.56
  -2   2  -3   27.37    5.79
  -2   2  -3   25.62    9.84
  -2  -2  -3   30.60    8.43
  -2   2  -3   25.33    8.81
  -2  -2  -3   26.55    9.43
  -2  -2  -3   28.30    6.74
  -2   2  -4 1852.19  163.58
  -2  -2  -4 2179.89  174.74
  -2   2  -4 1855.56  171.20
  -2  -2  -4 1940.71  165.83
  -2   2  -4 2023.68  177.80
  -2  -2  -4 1767.27  165.25
  -2  -2  -5   99.29   22.69
  -2   2  -5  105.54   22.60
  -2  -2  -5   91.86   14.75
  -2   2  -5  105.82   22.70
  -2  -2  -5   76.91   14.16
  -2   2  -6   48.82    9.27
  -2  -2  -6   77.35   21.12
  -2   2  -6   60.44   20.10
  -2   2  -6   58.88   17.98
  -2  -2  -6   45.69   10.89
  -2  -2  -7   90.71   11.36
  -2   2  -7   98.64   12.69
  -2   2  -7   85.13   22.39
  -2  -2  -7   64.46   14.15
  -2   2  -7   88.70   15.79
   2   2   7   95.36   14.72
  -2   2  -7   63.45   22.22
  -2   2  -8  214.45   35.00
  -2   2  -8  199.98   25.15
  -2   2  -8  195.41   23.64
  -2   2  -8  212.98   28.84
  -2   2  -8  152.41   36.19
   2   2   8  196.91   25.40
  -2  -2  -8  168.16   25.40
  -2   2  -8  195.09   22.81
  -2  -2  -8  244.47   23.91
  -2   2  -8  227.30   23.64
  -2   2  -9  746.32   70.44
  -2  -2  -9 1084.28   95.47
  -2   2  -9  776.82   89.18
  -2   2  -9  767.39   61.52
  -2   2  -9  642.86   62.82
  -2   2  -9  460.14   58.79
  -2  -2  -9  639.27   60.20
  -2  -2  -9  717.52   61.26
  -2   2  -9  725.82   62.07
  -2   2  -9  495.72   69.80
  -2   2 -10  233.02   29.10
  -2   2 -10  229.42   28.02
  -2  -2 -10  313.05   47.31
  -2   2 -10  246.24   45.34
  -2   2 -10  282.50   28.34
  -2  -2 -10  271.98   28.27
  -2   2 -10  238.11   34.52
  -2  -2 -10  258.52   27.57
  -2  -2 -11  416.20   40.00
  -2   2 -11  398.56   41.07
  -2  -2 -12   24.77    5.73
  -2   2 -12   30.90    8.63
  -2  -2 -12   20.45    7.18
  -2   2 -12   19.20    6.27
  -2  -2 -13  681.17   68.21
  -2   2 -13  815.54   71.01
  -2  -2 -13 1058.55   72.89
  -2   2 -13  923.62   72.72
  -2   2 -13  673.06   69.90
  -2   2 -14   23.02    5.89
  -2   2 -14   21.64    4.96
  -2  -2 -15   30.73    4.04
  -2   2 -15   28.98    4.16
  -2  -3  15  448.21   45.94
  -2   3  15  565.20   46.00
  -2   3  14  141.37   17.25
  -2  -3  14  186.24   19.72
   2   3 -14  158.47   17.08
  -2  -3  14  164.15   18.43
   2   3 -14  160.19   16.44
  -2  -3  13   -1.07    3.22
   2   3 -13    0.78    2.99
   2   3 -13   -1.91    2.87
  -2   3  13   -1.06    4.20
  -2  -3  13    3.84    5.60
  -2  -3  12   -1.19    3.34
  -2  -3  12    2.64    2.96
   2   3 -12    1.13    3.96
  -2  -3  12    4.56    6.24
  -2   3  12    6.32    5.02
   2   3 -12    3.62    3.33
   2   3 -11  116.46   16.09
  -2  -3  11  175.88   32.31
  -2   3  11  148.42   30.17
   2   3 -11  131.33   18.00
  -2  -3  11  153.21   21.87
  -2   3  11  112.81   18.77
  -2  -3  11  170.31   17.48
  -2  -3  11  116.80   16.18
  -2  -3  11  132.82   17.97
   2  -3 -10   18.63    7.82
  -2  -3  10   24.58    7.84
  -2  -3  10   29.79    9.75
  -2   3  10   27.34    8.52
  -2  -3  10   14.74    4.63
   2   3 -10   17.68    5.13
  -2   3  10   18.10   11.87
  -2  -3  10   29.77   14.36
  -2  -3  10   18.35    6.89
   2  -3  -9 1477.04  134.92
  -2  -3   9 1561.21  135.19
  -2   3   9 1579.20  139.38
  -2   3   9 1540.00  134.02
  -2  -3   9 1733.96  136.34
  -2  -3   9 1530.48  129.17
  -2   3   9 1630.66  155.73
  -2  -3   9 1770.38  156.60
  -2  -3   9 1387.83  134.02
   2   3  -9 1361.53  128.87
  -2  -3   9 1425.29  129.54
   2  -3  -8   50.42   11.01
  -2  -3   8   62.35   11.79
  -2   3   8   54.17   12.88
  -2  -3   8   56.00   12.83
   2   3  -8   71.62   12.30
  -2   3   8   76.46   21.93
  -2  -3   8   88.25   22.42
   2  -3  -7    3.58    2.84
   2   3  -7    3.51    2.78
  -2  -3   7   -4.04   10.51
  -2   3   7    8.34    9.89
  -2  -3   7   -1.26    3.00
  -2   3   7    3.54    3.76
   2   3  -6  201.58   22.55
   2  -3  -6  202.01   22.58
  -2  -3   6  194.84   22.96
   2   3  -5 1704.65  146.49
   2  -3  -5 1702.59  145.83
  -2  -3   5 1687.35  147.26
   2  -3  -4  120.08   12.51
  -2   3   4   84.35   13.14
  -2   3   4  109.69   15.32
  -2  -3   4   95.73   13.42
   2   3  -4  124.34   13.51
  -2   3   4  109.05   19.86
  -2  -3   4  102.95   22.17
  -2   3   3   94.01   14.06
  -2  -3   3   95.13   13.26
  -2   3   3  111.23   13.97
  -2  -3   3  125.55   13.11
  -2   3   3  121.77   17.78
  -2  -3   3   95.69   17.83
   2  -3  -3   86.78   10.20
  -2   3   2  142.96   16.77
  -2  -3   2  137.19   16.15
  -2   3   2  129.48   15.94
  -2  -3   2  160.79   16.30
  -2   3   2  129.75   18.80
  -2  -3   2  139.58   19.78
  -2  -3   2  178.62   18.74
  -2   3   1    4.14    2.91
  -2  -3   1   13.17    3.70
  -2  -3   1    7.32    4.77
  -2   3   1   10.64    4.11
  -2  -3   1   10.93    3.54
  -2   3   1    5.51    2.22
  -2  -3   1   10.45    4.36
  -2  -3   1   11.69    4.65
  -2   3   1    6.77    3.65
   2  -3   0  357.23   32.58
  -2  -3   0  426.95   36.96
  -2   3   0  386.93   33.46
  -2  -3   0  408.27   37.76
  -2   3   0  395.93   36.52
  -2  -3   0  405.07   37.74
  -2   3   0  415.47   34.54
  -2   3  -1  441.39   44.09
  -2  -3  -1  492.82   45.51
  -2   3  -1  477.95   42.70
  -2  -3  -1  485.12   46.39
  -2   3  -1  479.04   50.18
  -2  -3  -2  248.18   26.84
  -2   3  -2  198.18   24.48
  -2  -3  -2  268.07   27.56
  -2   3  -2  216.85   25.09
  -2   3  -2  240.00   23.49
  -2  -3  -2  232.35   25.36
  -2  -3  -3   98.54   16.06
  -2   3  -3   81.04   14.42
  -2  -3  -3  105.02   16.21
  -2   3  -3   94.46   12.02
  -2   3  -3   75.99   15.36
  -2  -3  -3   76.69   14.79
  -2   3  -3   53.33   16.94
  -2  -3  -4    2.08    5.84
  -2   3  -4   -1.87    4.87
  -2   3  -4    1.99    2.80
  -2  -3  -4    1.67    5.30
  -2   3  -4   -3.77    8.93
  -2   3  -5 2774.33  251.21
  -2   3  -5 2964.88  243.34
  -2   3  -5 2530.79  260.80
  -2  -3  -5 2396.14  245.12
  -2  -3  -6  212.77   33.39
  -2   3  -6  200.05   32.57
  -2   3  -6  173.31   23.25
  -2   3  -6  159.09   34.92
  -2  -3  -6  176.61   25.77
  -2  -3  -7  184.56   31.43
  -2   3  -7  107.40   25.80
  -2  -3  -7  122.11   20.95
  -2   3  -7  135.52   30.51
  -2   3  -7  126.34   18.67
  -2  -3  -7  128.05   14.71
  -2   3  -8  233.60   28.01
  -2   3  -8  216.94   28.85
  -2   3  -8  296.56   35.05
  -2   3  -8  235.32   42.65
   2   3   8  284.98   32.25
  -2  -3  -8  381.76   48.65
  -2  -3  -8  231.01   32.14
  -2  -3  -8  267.34   27.14
  -2   3  -8  247.12   27.53
  -2   3  -8  178.31   38.35
   2  -3   8  303.91   28.03
   2  -3   8  278.53   26.01
  -2   3  -8  241.25   27.55
  -2   3  -9 1728.03  156.75
  -2   3  -9 1903.09  163.85
  -2  -3  -9 2484.86  183.63
  -2   3  -9 1444.62  173.26
   2  -3   9 1977.69  153.71
  -2   3  -9 1237.28  165.95
  -2  -3  -9 1815.04  152.81
  -2   3  -9 1810.61  153.78
  -2   3  -9 1567.63  154.08
  -2   3 -10   -1.07    3.58
  -2   3 -10    2.55    3.83
  -2  -3 -10   -4.07    6.11
  -2   3 -10   -4.79    8.80
  -2   3 -10   -1.04    2.91
  -2   3 -10   -1.46    4.10
   2  -3  10    0.95    2.25
  -2  -3 -10   -2.08    4.41
  -2  -3 -10   -0.87    2.62
  -2   3 -11  165.25   20.62
  -2   3 -11  162.97   19.52
   2  -3  11  165.38   18.82
  -2  -3 -11  149.09   18.07
  -2   3 -12    5.10    4.19
  -2  -3 -12   -1.99    4.83
  -2   3 -12   -1.17    4.97
  -2   3 -13    8.70    4.74
  -2  -3 -13   11.13    4.35
  -2   3 -13    2.59    3.58
  -2   3 -13    6.41    3.94
  -2   3 -14   74.67    9.97
  -2  -3 -14   78.28    9.72
  -2   3 -14   81.81    9.19
  -2   3 -14   91.48   10.53
   2  -3  14   79.22   10.33
   2   4 -15    0.44    1.80
  -2  -4  15   -0.55    1.92
  -2  -4  14   68.11    9.84
  -2   4  14   52.83    8.40
   2   4 -14   59.87    8.32
  -2  -4  14   48.39    9.16
   2   4 -14   51.85    8.58
  -2  -4  13  910.61   76.90
   2   4 -13  882.37   76.28
  -2   4  13  880.06   75.85
  -2  -4  13  989.25   78.37
   2   4 -13  842.85   74.82
  -2  -4  12   79.86   11.52
   2   4 -12   63.66   11.74
   2   4 -12   75.26   11.44
  -2   4  12   73.23   12.40
  -2  -4  12   81.89   14.06
  -2  -4  12   84.38   13.21
  -2  -4  11  465.03   42.33
   2   4 -11  425.09   42.38
   2   4 -11  359.47   43.09
  -2   4  11  450.94   44.74
  -2  -4  11  506.97   47.18
  -2   4  11  430.97   59.77
  -2  -4  11  538.86   65.69
  -2  -4  11  417.98   42.32
   2   4 -10  497.53   46.66
  -2  -4  10  509.84   46.04
  -2   4  10  442.91   48.00
  -2  -4  10  470.89   49.68
  -2  -4  10  469.55   46.18
  -2  -4  10  451.22   50.24
  -2   4  10  571.72   70.10
  -2  -4  10  565.07   70.00
  -2  -4   9  265.20   33.38
  -2  -4   9  267.17   27.73
  -2  -4   9  286.23   27.42
   2   4  -9  265.75   27.86
   2   4  -9  228.29   30.97
  -2   4   9  338.30   49.67
  -2  -4   9  380.14   53.02
   2  -4  -9  240.44   31.31
  -2   4   9  298.35   36.67
  -2  -4   9  221.30   28.20
  -2   4   9  243.29   29.71
  -2  -4   9  341.44   32.70
   2  -4  -8  248.33   28.94
  -2   4   8  277.56   33.76
  -2  -4   8  268.53   45.09
  -2   4   8  294.02   45.58
   2   4  -8  230.20   28.50
  -2  -4   8  271.82   28.44
  -2   4   8  195.68   26.38
  -2  -4   8  230.42   24.79
  -2  -4   8  258.68   32.06
   2  -4  -7  141.65   18.63
   2   4  -7  134.67   18.62
   2  -4  -6  602.11   57.63
   2   4  -6  638.68   58.91
  -2   4   5  848.10   76.99
   2   4  -5  844.98   72.82
   2  -4  -5  783.49   71.02
  -2   4   5  715.55   71.24
  -2   4   5  875.89   86.76
  -2  -4   5  859.86   92.18
  -2  -4   4   58.32   17.70
  -2   4   4   86.28   18.44
  -2   4   4   58.34   11.60
  -2  -4   4   70.63   11.47
   2  -4  -4   52.18    8.39
  -2   4   4   77.63   11.72
  -2   4   4   90.12   13.62
  -2  -4   4   71.80   10.65
  -2   4   3  408.82   40.85
  -2  -4   3  387.48   38.52
  -2   4   3  472.76   46.20
  -2  -4   3  338.24   45.64
  -2   4   3  337.26   38.32
  -2  -4   3  479.90   39.52
  -2   4   2  115.86   17.53
  -2  -4   2  117.59   18.34
  -2  -4   2  128.29   14.71
  -2  -4   2  166.82   15.22
  -2   4   2  102.58   13.95
  -2  -4   2   88.66   13.59
  -2   4   2  117.21   15.15
  -2  -4   1  983.42   80.72
  -2   4   1  850.36   78.46
  -2  -4   1  894.76   78.27
  -2   4   1  826.16   78.30
  -2  -4   1 1038.19   80.46
  -2   4   1  849.06   78.42
   2  -4   0    2.71    1.26
  -2   4   0    1.13    1.50
  -2   4   0    1.37    2.91
  -2  -4   0   -0.81    3.35
  -2   4   0    3.26    4.89
  -2  -4   0    1.10    4.69
  -2   4  -1 1622.47  148.86
   2  -4   1 1797.71  147.11
  -2  -4  -1 1913.99  151.51
  -2   4  -1 1612.15  149.44
  -2   4  -1 1710.91  157.95
  -2  -4  -1 1899.92  155.31
  -2  -4  -2    8.81    4.97
  -2   4  -2    0.90    2.90
  -2  -4  -2    1.70    5.71
  -2   4  -2   10.51    7.39
  -2   4  -2   10.05    6.76
  -2   4  -2    9.32    3.43
  -2   4  -3   13.42    7.89
  -2   4  -3    8.40    3.34
  -2  -4  -3    8.83    5.44
  -2   4  -3    6.16    4.17
  -2   4  -3    3.50    4.15
  -2  -4  -3    8.40    5.18
  -2   4  -4   18.60    8.35
  -2   4  -4   24.61    6.28
  -2  -4  -4   32.03   10.33
  -2   4  -4   14.85    6.76
  -2  -4  -4   19.74    8.03
  -2  -4  -4   15.28    9.70
  -2   4  -4   17.54   12.42
  -2   4  -5  658.46  102.47
  -2  -4  -5  765.44   91.01
  -2  -4  -5 1156.61   96.89
  -2   4  -5  917.81   92.23
  -2   4  -5  987.29   87.61
  -2   4  -5 1162.17   96.58
  -2   4  -6  183.60   40.47
  -2  -4  -6  199.85   30.25
  -2   4  -6  203.18   26.30
  -2  -4  -6  269.94   35.44
  -2   4  -6  204.77   31.95
  -2   4  -7  181.78   24.00
  -2   4  -7  169.32   20.78
  -2   4  -7  151.38   36.04
  -2  -4  -7  159.74   27.02
  -2   4  -7  154.51   23.57
  -2  -4  -7  172.19   25.60
  -2  -4  -7  234.24   34.82
  -2   4  -7  156.93   29.56
  -2   4  -7  183.77   24.71
  -2   4  -7  146.81   19.22
  -2   4  -7  156.98   19.92
  -2  -4  -7  180.43   18.35
  -2  -4  -8   93.37   13.12
  -2   4  -8   49.73   20.43
  -2  -4  -8   66.79   16.13
  -2   4  -8   62.13   13.77
  -2  -4  -8   98.41   18.49
  -2  -4  -8  132.72   25.36
  -2   4  -8   74.31   20.44
   2   4   8   75.45   14.81
   2  -4   8   71.56   10.06
  -2   4  -8   73.23   12.17
  -2   4  -8   65.47   12.04
  -2   4  -8   88.97   12.54
  -2   4  -8   68.66   14.08
  -2   4  -9  368.90   38.82
  -2   4  -9  338.94   39.73
  -2   4  -9  351.43   44.92
  -2  -4  -9  366.96   45.42
  -2   4  -9  306.52   51.45
   2   4   9  336.44   41.47
  -2   4  -9  338.21   37.47
   2  -4   9  383.67   35.68
  -2   4  -9  290.60   52.89
  -2   4  -9  382.87   37.71
   2  -4   9  373.67   37.39
  -2  -4  -9  435.25   38.99
   2  -4  10  198.09   22.78
  -2  -4 -10  222.01   34.77
  -2   4 -10  179.43   35.11
  -2   4 -10  151.95   22.62
  -2  -4 -10  187.75   29.21
  -2   4 -10  197.49   29.83
  -2  -4 -10  285.80   39.44
  -2   4 -10  150.83   32.81
  -2   4 -10  207.91   23.69
  -2  -4 -10  239.57   24.02
  -2  -4 -11  258.34   28.12
   2  -4  11  239.56   27.84
  -2   4 -11  270.51   30.80
  -2  -4 -11  287.24   29.66
  -2   4 -11  315.16   29.74
  -2   4 -12  234.36   26.66
  -2  -4 -12  276.68   26.58
   2  -4  12  212.83   24.26
  -2   4 -12  244.64   26.60
   2  -4  12  263.66   27.85
  -2  -4 -13  707.85   74.55
  -2   4 -13  949.43   75.28
  -2   4 -13  951.06   77.50
  -2   4 -13  899.26   76.69
   2  -4  14   76.80    9.32
  -2   4 -14   90.31    8.32
  -2   4 -14  107.13   10.32
   2   5 -15  224.75   18.87
   2  -5 -15  259.79   19.03
  -2  -5  14   49.44    8.28
   2   5 -14   57.75    8.57
   2   5 -14   52.89    7.69
  -2  -5  14   48.55    8.56
   2   5 -13   59.35    9.42
  -2  -5  13   54.66   10.28
   2   5 -13   67.90   10.87
  -2  -5  13   60.59   10.95
   2   5 -12  185.86   20.81
  -2   5  12  150.38   19.95
  -2  -5  12  204.16   22.69
   2   5 -12  178.77   21.76
  -2  -5  12  169.00   19.96
  -2  -5  11   62.11   11.04
  -2   5  11   69.31   12.12
  -2  -5  11   74.03   13.60
  -2   5  11  109.95   24.51
  -2  -5  11  122.67   27.70
  -2  -5  11  103.34   12.56
   2   5 -11   81.01   12.24
   2   5 -11   64.46   13.07
  -2  -5  10   60.58   13.33
  -2   5  10   79.28   22.94
  -2  -5  10   61.74   21.00
  -2   5  10   54.22   14.55
   2   5 -10   35.36   11.13
  -2  -5  10   74.35   12.18
   2   5 -10   52.77    9.79
  -2  -5  10   63.05   11.87
  -2   5  10   63.81   11.20
  -2  -5  10   55.20    9.92
  -2  -5  10   71.90   10.35
  -2   5   9 1594.90  139.03
   2   5  -9 1409.37  132.85
  -2  -5   9 1444.01  128.78
   2   5  -9 1510.24  127.47
  -2  -5   9 1376.50  126.73
  -2  -5   9 1730.30  136.42
  -2  -5   9 1504.55  126.72
   2   5  -9 1351.24  125.87
  -2  -5   9 1558.10  129.54
  -2   5   9 1376.15  127.77
   2   5  -8   10.01    5.03
  -2  -5   8    5.03    4.29
  -2   5   8    6.90    4.21
  -2  -5   8    7.50    4.12
  -2  -5   8   17.92    8.46
  -2  -5   8    4.54    2.93
   2   5  -8    3.76    2.80
  -2  -5   8    3.30    2.66
  -2  -5   7    1.89    5.31
  -2  -5   7    0.73    1.89
   2  -5  -7    2.48    2.63
  -2   5   7    4.15    8.81
  -2  -5   7    5.36    9.85
   2   5  -7    1.48    3.15
   2  -5  -6   35.00    7.71
  -2   5   6   48.15   16.52
  -2  -5   6   45.42   18.05
   2   5  -6   39.28    8.73
  -2   5   6   43.04   11.14
  -2   5   5  744.63   74.83
  -2   5   5  665.55   69.22
  -2  -5   5  864.12   72.45
  -2   5   5  687.83   71.69
   2   5  -5  794.85   71.00
  -2  -5   5  747.74   90.37
  -2   5   4  558.30   54.06
  -2  -5   4  396.35   55.60
  -2  -5   4  433.85   41.49
  -2   5   4  370.76   41.57
  -2   5   4  436.69   45.94
  -2   5   3  428.27   43.93
  -2  -5   3  354.08   44.40
  -2  -5   3  420.10   35.50
  -2   5   3  287.78   34.25
  -2   5   3  359.06   39.05
  -2   5   2  771.19   63.74
  -2  -5   2  668.20   57.67
  -2  -5   2  524.45   60.79
  -2   5   2  563.02   55.43
  -2  -5   2  649.49   55.64
  -2   5   2  568.40   58.95
  -2  -5   1  483.63   46.89
  -2   5   1  468.53   45.78
  -2   5   0  831.84   81.37
   2  -5   0  970.73   80.34
  -2   5   0  900.27   81.81
  -2  -5   0  924.88   82.97
  -2  -5   0  990.14   83.39
  -2   5   0  939.31   82.18
  -2   5   0  860.58   88.22
  -2   5   0 1003.55   90.52
  -2  -5   0 1199.27   89.98
  -2   5  -1  212.54   27.22
  -2  -5  -1  215.29   25.51
  -2   5  -1  185.03   18.17
   2  -5   1  173.03   15.31
  -2  -5  -1  179.14   18.68
  -2   5  -1  171.83   17.43
  -2   5  -2  604.56   62.57
  -2  -5  -2  484.82   55.97
  -2   5  -2  520.03   48.96
  -2   5  -2  497.05   58.25
   2  -5   2  527.60   46.36
  -2   5  -2  450.50   47.72
  -2  -5  -2  559.25   50.31
  -2   5  -3  559.66   64.78
  -2   5  -3  470.60   58.08
  -2   5  -3  492.41   47.99
  -2   5  -3  467.39   47.64
  -2  -5  -3  510.22   49.75
  -2   5  -4  819.02   80.94
  -2  -5  -4  998.35   84.61
  -2  -5  -4  866.86   82.76
  -2  -5  -4  678.14   86.26
  -2   5  -4  897.45   80.52
  -2   5  -4  852.01   90.84
  -2   5  -4  807.22   80.49
  -2  -5  -4  981.61   83.86
  -2  -5  -5 1392.91  112.51
  -2   5  -5 1052.23  107.89
  -2  -5  -5 1166.64  108.51
  -2   5  -5 1413.99  136.44
  -2  -5  -5 1052.08  113.50
  -2   5  -5 1113.35  105.78
  -2   5  -5 1310.15  118.27
  -2   5  -5  970.59  106.41
  -2  -5  -5 1340.34  111.42
  -2  -5  -6  196.05   20.68
  -2  -5  -6  205.34   28.68
  -2  -5  -6  241.91   32.09
  -2   5  -6  177.89   28.78
  -2   5  -6  187.86   25.83
  -2   5  -6  196.27   31.25
  -2   5  -6  262.05   48.32
  -2  -5  -6  176.95   31.33
  -2  -5  -6  232.85   31.39
  -2   5  -7   -1.80    6.32
  -2   5  -7   -1.24    3.73
  -2  -5  -7   -2.81    7.30
  -2   5  -7    6.43    9.65
  -2  -5  -7   -1.06    3.74
  -2   5  -7   -2.01    6.03
  -2  -5  -7   -2.28    4.20
  -2  -5  -7    2.80    5.94
  -2   5  -7   -2.90    4.36
  -2   5  -7    1.99    2.99
  -2   5  -7    1.00    3.37
  -2  -5  -7   -5.33    8.00
  -2   5  -7   -1.11    2.89
   2  -5   7    4.60    2.51
  -2  -5  -8   30.78    8.25
  -2   5  -8   74.16   24.81
  -2  -5  -8   32.03   11.91
  -2   5  -8   57.09    9.64
  -2   5  -8   39.59    9.49
  -2   5  -8   35.76   12.37
  -2  -5  -8   51.70   13.57
  -2  -5  -8   48.46   15.18
  -2   5  -8   43.18   14.99
   2   5   8   41.46   11.39
   2  -5   8   50.01    7.79
  -2   5  -8   42.08    9.27
  -2  -5  -8   51.96   15.45
  -2   5  -8   64.80   13.19
  -2  -5  -9 1203.47  109.66
  -2   5  -9  784.80  104.50
   2  -5   9 1193.54   95.12
  -2   5  -9 1191.86  100.00
  -2  -5  -9 1016.77   94.11
  -2   5  -9  758.06  113.07
  -2   5  -9 1008.20   95.65
  -2   5  -9  920.76   94.18
   2  -5   9 1272.39   93.05
  -2   5  -9  896.28   96.78
  -2   5  -9 1063.20  104.03
  -2  -5  -9 1051.86  103.63
  -2  -5  -9 1054.95  108.21
  -2   5  -9  789.50  105.11
   2   5   9  978.76   99.84
  -2   5  -9 1064.38   94.22
  -2  -5  -9 1186.98   95.11
  -2  -5  -9  938.31  101.96
  -2   5 -10   21.09    7.62
  -2   5 -10   13.09    7.52
  -2  -5 -10   17.71    8.21
  -2   5 -10   14.06    7.01
  -2   5 -10   20.47    6.24
  -2   5 -10   26.83   12.43
   2  -5  10   18.72    5.74
  -2  -5 -10   23.98    6.55
  -2  -5 -10   26.03    6.74
  -2   5 -10   11.32    5.60
  -2   5 -10   26.07    7.74
  -2  -5 -11   28.49    6.45
  -2   5 -11   28.22    7.55
  -2  -5 -11   24.47    6.61
  -2   5 -11   20.43    6.88
   2  -5  11   28.68    6.56
  -2   5 -11   22.15    6.49
  -2   5 -12    6.19    3.18
   2  -5  12    9.25    3.45
   2  -5  12   14.29    5.99
  -2   5 -12   11.89    4.35
  -2  -5 -12    7.98    3.80
  -2   5 -13   28.85    4.75
   2  -5  13   20.35    5.20
   2  -5  13   32.59    5.56
  -2  -5 -13   15.54    4.01
  -2   5 -13   26.39    6.02
  -2   5 -14   -0.44    2.03
   2   6 -14    7.39    3.18
   2   6 -14   12.16    4.04
  -2  -6  14   11.93    4.03
   2   6 -13  167.96   19.56
   2   6 -13  190.73   20.93
  -2  -6  12  183.09   22.88
   2   6 -12  216.35   23.54
  -2  -6  12  220.15   23.04
   2   6 -12  221.53   24.93
   2   6 -11   10.23    4.06
  -2  -6  11   13.26    4.43
  -2  -6  11   16.28    6.18
  -2  -6  11    6.01    5.42
   2   6 -11    8.41    4.85
  -2  -6  11   19.53    5.29
  -2   6  10    2.73    3.34
  -2  -6  10    3.07    3.91
  -2  -6  10    2.32    3.48
  -2   6  10    5.17    5.49
   2   6 -10    2.07    4.90
   2   6 -10   -1.07    3.22
  -2  -6  10   -1.01    3.02
  -2  -6  10    3.85    4.71
   2   6 -10    3.46    2.90
  -2  -6  10    0.91    2.36
  -2   6   9   24.48    9.89
  -2   6   9   27.91    6.98
   2   6  -9   27.24    6.65
  -2  -6   9   48.32    8.01
  -2  -6   9   63.39   13.77
   2   6  -9   37.37    8.02
  -2   6   9   73.59   20.75
  -2  -6   9   45.23   19.19
  -2  -6   9   39.55    7.94
   2   6  -9   33.95    9.92
  -2  -6   9   32.39    8.24
   2   6  -8 1029.06   93.19
  -2   6   8 1063.53  109.09
  -2  -6   8 1341.57  125.87
  -2   6   8  770.25   91.81
  -2  -6   8  936.61   94.29
  -2  -6   8  945.24   86.24
  -2  -6   8 1143.16   95.74
  -2  -6   8  955.40   88.36
   2   6  -8  959.33   86.22
  -2  -6   8  977.05   86.05
  -2  -6   7   68.70   13.11
  -2  -6   7   67.47   14.45
  -2  -6   7   60.56    9.87
  -2   6   7   77.22   16.65
   2   6  -7   83.04   14.58
  -2  -6   7   72.30   14.24
  -2   6   7   59.39   13.17
  -2  -6   7  123.81   32.14
  -2   6   7   92.69   22.59
  -2  -6   7   76.38   10.87
  -2  -6   7   75.92   11.85
   2   6  -6  394.44   40.56
  -2   6   6  396.48   52.64
  -2  -6   6  502.38   64.74
  -2   6   6  355.36   43.51
  -2  -6   6  425.73   42.34
  -2  -6   6  360.15   35.07
  -2  -6   6  369.35   39.87
  -2   6   6  301.17   38.97
  -2   6   6  358.63   36.11
  -2   6   5 2335.02  208.98
  -2  -6   5 2662.57  203.07
  -2   6   5 2156.63  202.10
   2   6  -5 2375.08  203.96
  -2   6   5 1940.07  201.39
  -2   6   5 3125.94  222.27
  -2  -6   5 3059.45  232.54
  -2   6   4  967.02  101.41
  -2  -6   4 1166.61   96.03
  -2   6   4  967.43   95.34
  -2  -6   4 1108.18  113.46
  -2   6   3   94.14   12.81
  -2  -6   3  102.83   12.95
  -2  -6   3   99.02   13.95
  -2  -6   3  123.89   22.33
  -2   6   3  114.46   19.92
  -2   6   3  104.96   17.87
  -2  -6   2  207.31   26.97
  -2  -6   2  241.84   24.58
  -2  -6   2  182.64   22.68
  -2   6   2  164.07   24.60
  -2  -6   1 1149.00   93.30
  -2  -6   1 1123.24   91.13
  -2   6   0   53.56   13.50
  -2  -6   0   60.82   13.45
  -2   6   0   46.57   11.82
   2  -6   0   42.08    6.62
  -2  -6   0   54.96   10.17
  -2   6   0   45.08    8.26
   2  -6   1  750.68   64.35
  -2   6  -1  700.93   64.82
  -2   6  -1  788.21   68.13
  -2   6  -1  650.62   64.29
  -2  -6  -1  783.86   76.29
  -2   6  -2   50.69    9.62
   2  -6   2   53.13    7.94
  -2  -6  -2   44.97   14.85
  -2   6  -2   67.57   17.39
  -2   6  -2   38.61    8.05
  -2   6  -3  131.62   27.57
  -2   6  -3  112.03   17.11
   2  -6   3  123.51   15.18
  -2  -6  -3  127.80   25.13
  -2   6  -3  185.64   31.84
  -2  -6  -3  141.35   18.35
  -2   6  -3  108.91   15.65
  -2   6  -4 1018.17  104.09
  -2   6  -4  909.06   74.77
  -2   6  -4  843.18   93.48
  -2   6  -4  827.61   79.87
  -2  -6  -4  873.26   80.78
  -2   6  -4  705.45   77.27
  -2   6  -5 1044.70   92.56
  -2   6  -5  958.26  104.15
  -2  -6  -5 1133.09   94.45
  -2   6  -5  903.19   90.67
  -2  -6  -5 1031.24  103.08
  -2   6  -5  847.37   90.57
  -2   6  -6    3.85    3.61
  -2  -6  -6    6.45    7.65
  -2   6  -6    6.34    6.74
  -2   6  -6    6.54    3.85
  -2   6  -6   -1.96    3.62
  -2  -6  -6    4.13    5.80
  -2  -6  -6    2.25    3.39
  -2  -6  -6    6.50    6.09
  -2   6  -6    4.14    4.91
  -2   6  -6    1.94    2.93
  -2   6  -6    3.49    7.41
  -2   6  -6    9.94    6.10
  -2  -6  -6    2.06    3.79
  -2   6  -7   61.05   11.01
  -2   6  -7   66.89   13.86
  -2  -6  -7   71.35   11.75
  -2   6  -7   92.80   29.53
  -2  -6  -7   65.94   18.50
  -2   6  -7   80.10   11.48
  -2   6  -7   68.16   12.28
  -2   6  -7   77.87   16.55
  -2  -6  -7   85.11   16.87
  -2   6  -7   54.12   14.45
  -2   6  -7   60.86   14.20
  -2   6  -7   48.99   14.25
  -2   6  -7   76.02   12.75
   2  -6   7   65.22    9.67
  -2   6  -8  865.50   71.78
  -2  -6  -8  735.47   65.57
  -2   6  -8  829.73   99.01
  -2  -6  -8  691.72   76.78
  -2   6  -8  752.95   65.80
  -2   6  -8  661.99   66.64
  -2   6  -8  739.22   71.93
  -2  -6  -8  777.87   75.91
  -2   6  -8  610.18   73.78
   2   6   8  718.54   72.24
  -2   6  -8  618.39   73.57
   2  -6   8  790.25   63.46
  -2   6  -8  645.30   65.75
  -2   6  -8  535.82   63.17
  -2   6  -9   -1.39    3.62
   2   6   9    4.10    6.14
  -2  -6  -9    2.61    5.55
  -2   6  -9    1.80    6.60
  -2   6  -9    2.64    5.60
  -2  -6  -9    5.17    5.49
   2   6   9    2.12    2.25
  -2   6  -9    1.08    2.82
   2  -6   9    2.30    2.30
  -2   6  -9   -2.52    4.62
   2  -6   9    1.12    2.91
  -2  -6  -9   -1.06    3.55
  -2   6  -9   -1.67    3.96
  -2  -6 -10    3.81    3.92
   2  -6  10   -1.06    2.52
  -2  -6 -10   -1.57    4.16
  -2   6 -10    5.34    3.27
  -2   6 -10    2.33    4.11
  -2   6 -10    1.30    3.38
  -2   6 -10   10.37    6.29
  -2   6 -10   -0.97    2.90
  -2   6 -10    1.48    4.15
  -2   6 -11    1.11    4.42
   2  -6  11    4.20    4.93
  -2  -6 -11    0.66    2.71
  -2   6 -11    1.56    2.34
   2  -6  11    0.91    2.57
  -2   6 -11    1.00    3.51
  -2  -6 -11    3.13    3.21
  -2   6 -11    1.13    3.79
   2  -6  12   88.10   14.28
   2  -6  12  121.02   13.96
  -2   6 -12  117.38   14.24
  -2   6 -12  114.51   13.15
   2  -6  12  109.28   13.42
  -2   6 -12  115.30   14.94
  -2   6 -13   71.44    8.39
   2  -6  13   80.39    9.64
   2   7 -14   81.94   10.36
   2  -7 -14   96.88   10.69
   2   7 -14  100.55   11.43
   2   7 -13  102.91   12.98
   2   7 -13   96.57   13.40
   2  -7 -13  106.98   12.93
   2   7 -12   28.38    6.72
  -2  -7  12   27.93    7.32
  -2  -7  12   28.63    6.07
   2   7 -11    2.09    3.86
  -2  -7  11    3.68    3.91
   2   7 -11    4.07    3.24
  -2  -7  11    3.77    3.33
  -2  -7  10  173.71   22.76
   2   7 -10  212.24   28.46
   2   7 -10  186.70   22.20
  -2  -7  10  173.05   20.86
   2   7 -10  188.72   21.22
  -2   7  10  245.76   38.33
   2   7 -10  204.65   39.60
  -2  -7  10  198.53   39.84
  -2  -7  10  175.77   21.36
   2   7  -9  590.56   68.49
   2   7  -9  630.98   63.09
  -2  -7   9  731.98   63.00
   2   7  -9  668.75   62.69
  -2  -7   9  680.64   65.28
  -2  -7   9  668.29   62.90
  -2   7   9  828.48   85.56
  -2  -7   9  878.96   96.41
  -2  -7   8  112.96   14.60
   2   7  -8  129.67   20.26
  -2  -7   8  114.01   19.70
  -2  -7   8  108.01   16.58
   2   7  -8  110.19   14.88
  -2  -7   8  106.84   14.34
  -2  -7   8   98.59   15.77
  -2   7   8   80.73   18.47
  -2   7   8  126.37   27.47
  -2  -7   8  165.30   35.89
  -2  -7   7   14.28    4.90
  -2  -7   7   15.59    4.87
  -2  -7   7   44.12   19.45
  -2   7   7   15.55   10.19
  -2   7   7   35.58   11.51
  -2  -7   7   14.51    6.53
   2   7  -7   11.58    6.61
  -2  -7   6  239.30   25.74
  -2   7   6  240.73   33.93
  -2  -7   6  238.16   30.59
  -2  -7   6  282.07   47.76
  -2   7   6  257.23   40.39
  -2  -7   6  213.32   25.15
  -2   7   6  296.31   27.50
   2   7  -6  277.20   31.85
  -2  -7   6  262.79   31.62
  -2  -7   5   68.46   13.20
  -2   7   5   65.15   12.40
  -2   7   5   54.07   13.90
  -2  -7   5   81.59   23.01
  -2   7   5   85.03   20.00
  -2  -7   5   78.79   10.19
  -2   7   5   57.91    9.77
   2   7  -5   65.32   13.02
  -2  -7   5   68.69   14.17
  -2  -7   5   72.46   12.95
  -2   7   4  934.49   84.14
  -2  -7   4  759.42   85.16
  -2  -7   4  689.78   68.06
  -2   7   4  958.95   70.51
  -2  -7   4  796.05   75.02
  -2  -7   4  764.29   73.59
  -2   7   4  570.61   74.72
  -2  -7   3  768.21   66.27
  -2  -7   3  725.92   64.05
  -2   7   3  813.29   73.08
  -2  -7   3  623.78   70.62
  -2   7   2   26.69    8.85
  -2  -7   2   29.84    8.30
  -2  -7   2   20.09    7.95
  -2  -7   2   28.70    8.73
  -2  -7   1 1474.40  105.76
  -2  -7   1 1415.36  108.14
  -2   7   0 2476.13  165.38
  -2  -7   0 2546.53  164.78
   2  -7   1  794.60   73.31
  -2   7  -1  720.15   76.56
  -2   7  -1 1003.75   90.08
  -2   7  -1 1077.74   90.10
  -2  -7  -1  924.08   87.31
   2  -7   2   12.49    4.16
  -2   7  -2   10.08    4.67
  -2  -7  -2    8.97    8.44
  -2   7  -2    9.60    8.36
  -2   7  -3 1360.76  122.14
  -2   7  -3 1347.89  141.88
  -2   7  -3 1290.54  127.42
  -2   7  -3 1715.28  129.30
  -2   7  -3 1843.26  149.34
  -2  -7  -3 1483.54  140.61
   2  -7   3 1346.66  123.53
  -2   7  -4  668.67   77.63
   2  -7   4  568.55   53.66
  -2   7  -4  591.23   51.50
  -2   7  -4  516.61   69.92
  -2   7  -4  462.83   55.63
  -2  -7  -5    4.56    2.70
   2  -7   5    5.19    3.66
  -2   7  -5   12.61   10.93
  -2   7  -5    1.97    3.64
  -2   7  -5    4.85    3.12
  -2  -7  -5    8.09    4.31
  -2   7  -5   -5.55    5.90
  -2   7  -5    4.23    3.57
  -2   7  -5    9.14    5.38
  -2   7  -6  499.11   46.22
  -2   7  -6  314.91   36.85
   2  -7   6  318.81   37.24
  -2   7  -6  395.78   34.56
  -2   7  -6  322.52   40.51
  -2   7  -6  358.25   50.70
  -2  -7  -6  324.73   34.92
  -2  -7  -6  359.34   48.57
  -2   7  -6  271.67   35.50
  -2   7  -6  335.06   35.02
   2  -7   6  337.09   33.02
  -2   7  -7   63.58   12.64
   2  -7   7   45.19   11.02
  -2   7  -7   72.78   10.55
  -2   7  -7   44.83   13.07
  -2  -7  -7   57.94   10.33
  -2   7  -7   64.69   24.20
  -2  -7  -7   56.57   17.88
  -2   7  -7   49.02   10.90
  -2   7  -7   48.59    9.66
   2  -7   7   53.56    8.73
   2   7   8    7.98    7.38
  -2   7  -8   31.53   16.41
  -2  -7  -8   -3.07    7.33
  -2   7  -8   22.31    8.15
   2   7   8    6.87    6.01
  -2  -7  -8   15.15    5.91
  -2   7  -8   20.39   10.41
  -2   7  -8    8.66    5.58
  -2   7  -8   13.69    5.68
   2  -7   8    6.33    3.25
  -2   7  -8   15.20    5.33
  -2   7  -8    4.98    4.65
  -2   7  -8   13.23    4.77
  -2  -7  -9  155.29   19.36
  -2   7  -9  179.26   24.42
  -2   7  -9  188.09   22.87
  -2   7  -9  141.13   18.30
   2   7   9  141.05   29.82
   2  -7   9  172.16   18.32
  -2   7  -9  140.49   20.14
  -2   7  -9  143.92   19.34
  -2   7  -9  165.72   21.38
  -2   7 -10    4.38    6.20
  -2   7 -10    4.20    3.34
   2  -7  10    4.21    3.54
   2  -7  10    0.91    2.57
  -2   7 -10    1.24    3.48
  -2   7 -10    3.48    4.78
   2  -7  10    3.48    2.67
  -2   7 -10    0.92    2.78
  -2  -7 -10    3.55    3.65
  -2   7 -11   58.41    8.66
  -2  -7 -11   46.59    8.23
   2  -7  11   50.48    8.96
   2  -7  11   80.34   10.12
  -2   7 -11   41.98    9.67
   2  -7  11   64.90   11.71
  -2   7 -11   50.43    9.53
  -2   7 -11   55.54   10.08
  -2   7 -12   26.88    5.96
  -2   7 -12   33.84    5.39
   2  -7  12   35.06    6.04
  -2   7 -12   35.75    7.03
   2  -7  12   17.74    4.65
  -2   7 -12   33.20    6.67
   2  -7  12   29.93    7.01
   2  -7  13    7.05    2.45
  -2   7 -13    9.70    3.06
  -2   7 -13    5.93    2.84
   2   8 -14  319.70   29.12
   2  -8 -14  324.68   28.94
   2   8 -13   31.07    5.74
  -2  -8  13   13.79    4.54
   2  -8 -13   26.45    4.97
   2   8 -12    4.02    2.70
  -2  -8  12    4.84    3.44
   2  -8 -12    7.44    4.05
   2   8 -12   10.08    4.59
   2   8 -12    7.56    3.81
  -2  -8  11  144.72   19.62
   2   8 -11  178.23   19.89
   2   8 -11  140.32   17.78
   2   8 -11  182.11   20.74
  -2  -8  11  160.22   18.64
  -2  -8  10  637.89   64.69
   2   8 -10  722.32   64.49
  -2  -8  10  633.87   62.85
   2   8 -10  707.09   63.23
   2   8 -10  734.49   65.93
  -2  -8   9  180.76   25.15
  -2   8   9  138.03   23.47
   2   8  -9  186.77   30.60
   2   8  -9  109.88   20.73
  -2  -8   9  109.38   16.13
  -2   8   9  117.68   26.20
   2   8  -9  149.08   32.72
  -2  -8   9  150.41   34.33
   2   8  -9  138.52   17.69
  -2  -8   9  130.19   18.65
   2   8  -9  118.85   16.52
  -2  -8   9  145.20   17.03
  -2  -8   8  116.38   19.18
   2   8  -8  176.37   25.73
  -2  -8   8  179.71   22.28
  -2   8   8  181.28   33.26
  -2  -8   8  221.59   40.51
  -2  -8   8  154.08   18.95
  -2  -8   8  107.50   21.75
  -2   8   8  199.12   28.82
   2   8  -8  168.56   19.85
  -2  -8   8  172.39   19.44
   2   8  -7  226.48   31.09
  -2  -8   7  220.45   28.61
  -2   8   7  276.65   40.74
  -2  -8   7  298.58   47.50
  -2  -8   7  218.40   24.77
  -2  -8   7  218.74   24.51
  -2  -8   7  252.91   31.68
  -2   8   7  204.25   31.87
  -2  -8   6   58.68   12.59
  -2   8   6   43.31   12.75
   2   8  -6   48.89   11.94
  -2  -8   6   39.00   10.75
  -2  -8   6   46.83    8.60
  -2   8   6   59.43    9.68
  -2  -8   6   50.22   17.93
  -2   8   6   69.59   18.53
  -2  -8   6   44.00    8.24
   2   8  -5  731.70   71.70
  -2   8   5  774.66   80.33
  -2  -8   5  704.05   83.34
  -2  -8   5  775.99   71.93
  -2   8   5  712.82   75.11
  -2  -8   5  811.14   72.29
  -2  -8   5  689.38   64.78
  -2   8   5  650.90   65.00
  -2   8   4 1447.68  120.83
  -2  -8   4 1116.23  118.42
  -2  -8   4 1278.43  111.54
  -2   8   4 1122.88  114.07
  -2  -8   4 1398.32  112.55
  -2   8   4 1204.35  105.40
  -2  -8   4 1083.67  104.45
  -2  -8   3  197.59   24.78
  -2   8   3  153.79   25.66
  -2   8   3  181.82   19.78
  -2  -8   3  171.60   26.93
  -2  -8   3  215.53   25.37
  -2   8   3  166.91   19.78
  -2  -8   2   34.33    9.61
  -2   8   2   43.44    7.07
  -2   8   2   36.97    7.15
  -2   8   2   43.39   12.22
  -2  -8   2   31.83    9.02
  -2  -8   1  615.72   62.67
  -2   8   1  464.57   61.29
  -2   8   1  695.42   57.64
  -2  -8   1  693.00   66.42
  -2  -8   1  675.06   61.42
  -2   8   0   13.66    4.24
  -2  -8   0   16.77    8.90
  -2  -8   0   19.48    6.09
  -2  -8  -1  101.70   21.13
  -2   8  -1   91.41   18.79
  -2   8  -1   75.06   14.25
  -2   8  -1   89.47   19.56
  -2   8  -1   64.21   10.15
  -2  -8  -1   95.61   13.27
  -2  -8  -2   31.96   14.37
  -2   8  -2   52.74   15.60
  -2   8  -2   42.00    9.61
  -2   8  -2   56.78   17.16
  -2   8  -2   32.75    9.38
  -2   8  -3   10.47    3.82
  -2   8  -3    3.76    4.08
  -2   8  -3   19.95    6.80
  -2  -8  -3   13.84   10.42
  -2   8  -3   19.69   11.85
   2  -8   3    8.86    3.26
  -2   8  -3    9.37    4.07
  -2   8  -3   15.33    7.29
  -2  -8  -3   15.29    5.24
  -2   8  -4  739.96   86.38
  -2   8  -4 1035.78  110.58
  -2  -8  -4 1272.86  109.04
   2  -8   4  956.46   84.95
  -2   8  -4  962.92   89.49
   2  -8   4  967.64   84.84
  -2   8  -4 1357.23   95.26
  -2   8  -4  889.59   92.26
  -2   8  -4 1062.32  109.87
  -2   8  -4  978.46   85.79
  -2   8  -5  334.40   35.20
  -2  -8  -5  219.42   25.64
  -2   8  -5  275.11   27.07
  -2   8  -5  199.63   31.48
  -2   8  -5  282.35   45.07
   2   8   5  258.54   39.35
  -2   8  -5  357.19   54.10
  -2   8  -5  205.37   27.84
  -2   8  -5  239.83   28.31
   2  -8   5  256.34   26.09
   2  -8   5  264.10   26.19
  -2   8  -5  287.87   30.97
   2  -8   6   16.58    4.73
  -2   8  -6   18.41    6.34
  -2   8  -6   24.82    6.97
  -2   8  -6   14.24    8.07
  -2   8  -6   15.07    4.77
  -2  -8  -6   21.23   11.94
   2   8   6    7.22    8.66
  -2   8  -6   23.42   15.28
  -2  -8  -6   18.56    6.27
  -2   8  -6   18.25   10.62
  -2   8  -6   22.55    7.03
   2  -8   6    8.85    4.05
  -2   8  -6   26.37    8.04
   2  -8   7  264.13   25.32
  -2   8  -7  260.48   28.63
  -2  -8  -7  194.19   24.97
  -2   8  -7  283.99   33.18
  -2   8  -7  179.99   25.59
  -2   8  -7  195.13   25.28
  -2   8  -7  226.56   24.83
  -2   8  -7  190.48   30.71
   2   8   7  242.19   38.80
  -2  -8  -7  304.96   41.25
   2  -8   7  241.18   24.41
  -2   8  -8  151.40   19.77
  -2   8  -8  175.77   21.28
   2   8   8  142.13   23.49
  -2   8  -8  156.65   18.44
  -2   8  -8  140.30   24.54
  -2  -8  -8  153.79   19.14
  -2   8  -8  151.19   20.82
   2  -8   8  121.49   16.97
  -2   8  -8  163.44   21.23
   2  -8   8  159.04   18.64
   2   8   8  172.82   31.02
  -2   8  -8  129.30   33.58
  -2  -8  -8  172.69   29.12
   2  -8   9  105.32   14.62
   2  -8   9  138.14   19.45
  -2   8  -9  109.20   16.60
  -2   8  -9  132.44   15.37
  -2  -8  -9  114.96   15.37
  -2   8  -9   92.81   15.83
   2  -8   9  114.34   13.97
  -2   8  -9  100.70   15.11
  -2   8  -9  130.48   19.52
  -2   8 -10  999.33   80.54
  -2   8 -10  837.89   77.30
   2  -8  10  890.98   74.32
   2  -8  10  893.66   75.81
  -2   8 -10  835.76   77.23
  -2  -8 -10  840.30   75.27
   2  -8  10  827.29   76.56
  -2   8 -10  835.60   74.97
  -2   8 -10  706.52   74.72
  -2   8 -11  113.89   13.68
  -2   8 -11  114.86   15.42
   2  -8  11  136.16   14.94
  -2   8 -11  141.62   16.17
   2  -8  11  122.56   15.06
  -2  -8 -11  123.68   14.16
  -2   8 -11  115.95   16.15
   2  -8  12   11.25    3.17
  -2   8 -12    9.01    3.11
   2  -8  12    3.55    2.35
   2  -8  12    6.69    3.65
  -2   8 -12    5.85    2.96
   2  -8  13   28.18    4.01
   2   9 -13   11.33    3.30
   2  -9 -13   12.18    2.96
   2   9 -13    2.60    2.96
   2   9 -13    3.87    2.46
  -2  -9  13    4.40    2.24
   2   9 -12    0.73    2.44
   2  -9 -12    1.78    2.53
   2   9 -12    3.47    2.11
   2   9 -12   -0.73    2.68
  -2  -9  12    3.25    2.73
   2   9 -11   16.41    5.32
   2  -9 -11   22.35    5.57
   2   9 -11   -0.74    2.68
   2   9 -11   12.29    4.95
  -2  -9  11   12.40    4.81
   2   9 -10   45.83    9.12
   2  -9 -10   39.89    8.41
   2   9 -10   40.20    8.06
   2   9 -10   41.73    9.09
  -2  -9  10   46.88    9.60
   2   9  -9   12.29    5.28
   2   9  -9   18.47    5.55
  -2  -9   9   18.35    6.61
   2  -9  -9    9.88    4.58
   2   9  -9   10.06    5.61
  -2  -9   8   45.24   10.63
  -2   9   8   46.68   13.14
  -2  -9   8   36.86   11.13
   2   9  -8   44.61   12.36
   2   9  -8   79.06   20.22
  -2   9   8   49.71   16.48
   2   9  -8   48.28   18.20
  -2  -9   8   63.92   21.50
  -2  -9   8   38.03    9.76
  -2   9   8   47.50    8.86
   2  -9  -8   67.77   10.41
   2   9  -8   52.26    9.68
  -2  -9   8   47.65    9.17
  -2  -9   7    4.49    4.76
  -2   9   7   10.10    7.09
   2   9  -7    4.69    4.98
  -2  -9   7   -3.29    5.79
   2  -9  -7    7.88    4.44
  -2   9   7    3.51    7.46
   2   9  -7   14.13   10.00
  -2  -9   7    4.38    8.05
  -2  -9   7    1.00    2.61
   2   9  -7    4.46    3.35
  -2  -9   6  708.23   81.57
  -2   9   6  875.09   86.47
   2   9  -6  824.12   83.95
  -2  -9   6  886.37   81.66
  -2   9   6  978.35   93.50
   2   9  -6  768.91   94.82
  -2  -9   6  820.86   93.66
   2  -9  -6  864.63   75.98
  -2   9   6  883.85   76.76
  -2  -9   6  788.31   75.76
  -2  -9   5   93.99   17.47
  -2   9   5  109.57   19.78
   2   9  -5   69.77   15.77
  -2  -9   5  130.83   19.18
   2  -9  -5  107.79   13.16
  -2   9   5  107.35   21.90
  -2  -9   5   82.37   20.56
  -2   9   5   71.41   12.30
  -2  -9   5   83.74   12.60
  -2  -9   4   13.34    6.92
  -2  -9   4   13.55    4.70
  -2  -9   4   12.84    7.28
  -2   9   4   11.35    4.49
  -2  -9   4   11.70    6.29
  -2   9   4    9.65    6.35
  -2   9   3  177.79   19.22
  -2   9   3  143.28   17.81
   2   9  -3  143.40   26.50
  -2  -9   3  167.76   22.75
  -2  -9   3  148.37   22.96
  -2   9   3  162.79   25.36
  -2  -9   2  160.65   23.79
   2   9  -2  147.91   25.07
  -2   9   2  190.39   19.49
  -2   9   2  179.95   19.78
  -2  -9   2  152.90   23.22
  -2   9   2  135.74   23.66
  -2   9   1  128.58   14.55
  -2  -9   1  112.24   16.81
  -2  -9   1   97.50   17.91
  -2  -9   1   90.67   13.79
  -2  -9   0  710.40   75.08
  -2   9   0  720.99   63.13
  -2  -9   0  634.08   63.34
  -2  -9   0  733.05   64.91
  -2  -9   0  698.93   66.05
  -2   9  -1  121.38   16.50
  -2  -9  -1  139.50   26.22
  -2   9  -1  104.94   19.47
  -2   9  -1  163.39   16.84
  -2  -9  -1  135.76   16.92
  -2   9  -1  130.17   16.58
  -2   9  -2  404.80   38.25
  -2   9  -2  366.51   42.62
  -2   9  -2  468.43   54.85
  -2   9  -2  302.73   37.66
  -2   9  -2  348.76   36.75
  -2   9  -2  396.97   50.82
  -2  -9  -2  450.49   52.57
  -2   9  -2  386.86   35.92
  -2  -9  -2  312.52   35.98
  -2   9  -2  402.59   40.24
  -2   9  -3  177.22   21.58
   2  -9   3  141.32   19.36
  -2   9  -3  188.31   24.23
  -2  -9  -3  182.17   21.98
  -2   9  -3  208.14   28.10
   2  -9   3  183.22   19.80
   2  -9   3  204.17   22.71
  -2   9  -3  213.74   24.43
  -2   9  -3  250.53   38.36
  -2  -9  -3  234.52   36.51
  -2   9  -4   12.32    6.19
  -2   9  -4    6.88    4.90
  -2   9  -4    9.43    4.16
  -2   9  -4    8.54   10.15
  -2   9  -4    4.46    4.76
   2  -9   4    6.62    3.56
  -2  -9  -4    1.07    3.82
   2  -9   4    9.29    3.62
  -2  -9  -4    7.19   10.10
  -2   9  -4    4.50   11.70
  -2   9  -4    6.19    6.98
  -2   9  -5   96.87   16.35
  -2  -9  -5   63.30    9.82
  -2   9  -5   65.52   15.06
  -2   9  -5   68.05   10.84
  -2   9  -5   47.86   11.03
   2  -9   5   82.67   10.93
  -2   9  -5   60.80   11.56
   2   9   5   88.80   19.67
  -2   9  -5   60.44   22.02
  -2  -9  -5   51.56   10.59
   2  -9   5   59.54    9.82
  -2   9  -5   59.12   12.55
  -2   9  -6  893.66   81.14
  -2   9  -6  788.29   89.37
  -2   9  -6  906.56   83.09
  -2   9  -6 1056.52   88.59
   2  -9   6 1077.34   86.46
   2  -9   6  964.23   80.94
   2  -9   6  864.74   80.09
  -2   9  -6  754.82   83.26
   2   9   6  823.57   93.99
  -2   9  -6  908.88  107.55
  -2   9  -6  871.36   83.25
  -2   9  -7  115.46   16.94
  -2   9  -7  153.62   22.00
  -2   9  -7   93.97   14.81
  -2   9  -7  107.51   14.92
  -2   9  -7  102.67   20.55
   2   9   7  100.56   23.05
  -2   9  -7  121.07   30.67
  -2  -9  -7  138.01   26.30
  -2   9  -7  113.11   17.73
   2  -9   7  122.50   14.95
   2  -9   7  139.19   19.60
   2  -9   7  107.31   14.79
  -2   9  -7  113.49   16.51
  -2   9  -8  394.18   39.31
  -2   9  -8  349.57   40.18
  -2  -9  -8  359.55   39.36
  -2   9  -8  444.16   42.25
  -2   9  -8  514.66   46.76
   2  -9   8  455.26   44.47
   2  -9   8  434.68   39.87
   2  -9   8  380.14   38.24
  -2   9  -9   71.63   10.58
  -2  -9  -9   70.37   11.00
  -2   9  -9   85.48   12.73
   2  -9   9   74.15   10.97
   2  -9   9   70.07    9.85
  -2   9  -9   78.31   13.24
   2  -9   9   98.55   14.96
  -2   9  -9   56.82   10.68
  -2   9 -10   75.41   11.26
  -2  -9 -10   81.30   11.39
  -2   9 -10   97.13   12.99
  -2   9 -10   90.56   14.01
   2  -9  10   75.93   13.57
  -2   9 -10  113.58   14.23
   2  -9  10  104.37   12.27
   2  -9  10   86.66   12.58
   2  -9  11   18.77    4.55
  -2  -9 -11   21.11    4.51
  -2   9 -11   11.18    5.37
   2  -9  11   25.47    4.93
  -2   9 -11   29.21    5.95
   2  -9  12   26.52    4.02
   2  -9  12   14.76    3.24
  -2   9 -12   23.62    3.88
   2  10 -13   77.03    8.08
   2 -10 -13   67.23    7.22
   2  10 -12   85.89    9.92
   2 -10 -12   74.34    8.67
   2  10 -12   61.26    7.92
  -2 -10  12   65.33    9.20
  -2 -10  11   13.54    4.73
   2 -10 -11   25.29    5.24
   2  10 -11   24.73    5.71
   2  10 -11   24.86    5.50
   2  10 -11   19.33    4.80
   2  10 -10 1462.81  121.01
  -2 -10  10 1284.35  121.52
   2 -10 -10 1458.45  120.34
   2  10 -10 1326.33  120.71
   2  10  -9    2.06    3.29
   2  10  -9    0.98    2.75
   2 -10  -9    2.56    3.39
  -2 -10   9    5.99    4.22
   2  10  -8   -1.07    3.22
  -2 -10   8    0.98    3.30
  -2 -10   8    1.29    3.07
   2  10  -8    1.13    3.38
   2 -10  -8   -1.82    3.19
  -2 -10   8    1.30    3.65
  -2 -10   7   64.03   11.68
  -2 -10   7   36.90   11.14
  -2  10   7   46.75   12.80
   2  10  -7   61.09   14.76
   2  10  -7   42.72   15.18
   2  10  -7   56.85   18.42
  -2 -10   7   53.85   11.56
   2 -10  -7   40.23    8.48
  -2 -10   7   54.17    9.51
   2  10  -7   47.43    9.54
  -2 -10   6   70.60   15.63
  -2  10   6   74.06   16.46
   2  10  -6   63.47   15.31
  -2  10   6   84.16   12.38
   2  10  -6   96.26   23.50
  -2 -10   6   79.66   15.03
   2 -10  -6   80.02   11.53
  -2 -10   6   69.45   11.63
   2  10  -5   88.55   18.45
  -2  10   5  139.16   16.27
  -2 -10   5  128.56   21.15
  -2  10   5  107.25   20.05
  -2 -10   5  122.83   19.13
   2  10  -5  123.32   26.16
  -2 -10   5   86.46   14.20
  -2  10   4   20.88    5.68
  -2 -10   4   15.08    7.02
  -2  10   4   18.57    8.66
  -2 -10   4   26.19    8.28
   2  10  -4   20.49   10.36
  -2 -10   4   14.09    5.01
  -2  10   3    5.84    3.43
  -2 -10   3    2.11    3.16
  -2  10   3   -2.19    4.03
  -2 -10   2    7.28    5.39
   2 -10  -2    7.58    4.07
  -2  10   2    6.97    3.86
  -2  10   2   11.49    4.35
  -2 -10   2    2.08    4.96
  -2 -10   1   86.83   13.09
  -2 -10   1   87.26   14.30
  -2  10   1   77.08   11.54
  -2 -10   1   72.76   17.02
  -2  10   0   54.97   10.24
  -2 -10   0   50.29    9.45
  -2 -10   0   57.76   11.04
  -2 -10   0   60.61   10.19
  -2  10   0   46.08    8.87
  -2 -10   0   66.88   16.90
  -2  10  -1   67.26   15.48
  -2  10  -1   89.11   12.24
  -2 -10  -1   81.75   12.61
  -2 -10  -1   84.63   19.88
  -2  10  -1   80.35   12.85
  -2  10  -2   92.85   13.01
  -2  10  -2   79.70   13.22
  -2  10  -2   82.62   14.42
  -2 -10  -2   81.82   20.93
  -2  10  -2   70.49   11.17
  -2 -10  -2   68.12   11.82
  -2  10  -2   66.09   11.77
  -2  10  -2   93.59   17.72
  -2  10  -3    0.93    2.61
  -2  10  -3    1.41    3.67
   2 -10   3    5.25    3.35
  -2  10  -3   -1.12    2.91
  -2  10  -3    4.26    5.53
  -2 -10  -3   -1.09    3.84
  -2  10  -3   -1.23    4.34
   2 -10   3    4.39    3.69
  -2 -10  -3    6.85    9.62
  -2  10  -3    3.83    7.03
  -2  10  -3   -2.35    4.32
  -2  10  -4  436.16   60.42
  -2 -10  -4  461.08   58.50
  -2 -10  -4  368.05   42.03
   2 -10   4  474.98   43.36
  -2  10  -4  460.87   46.94
  -2  10  -4  486.81   47.38
  -2 -10  -4  435.06   44.19
  -2  10  -4  510.05   47.47
   2 -10   4  466.34   45.49
   2 -10   4  433.71   42.20
  -2  10  -4  470.45   43.52
  -2  10  -4  413.48   51.59
  -2 -10  -5  190.96   21.49
  -2 -10  -5  140.73   18.49
   2 -10   5  151.41   19.21
  -2  10  -5  177.32   23.12
  -2  10  -5  185.96   36.28
  -2 -10  -5  180.42   31.51
  -2  10  -5  177.87   23.38
  -2  10  -5  181.85   22.85
   2 -10   5  196.26   20.20
   2 -10   5  189.05   22.84
  -2  10  -5  138.74   25.18
   2 -10   6  319.71   35.51
   2 -10   6  303.32   31.93
  -2  10  -6  305.97   33.72
  -2  10  -6  316.71   35.64
   2 -10   6  344.34   32.51
  -2  10  -6  337.83   37.14
  -2  10  -6  329.96   52.12
  -2  10  -6  282.11   39.96
  -2 -10  -6  313.56   33.46
  -2  10  -6  345.74   35.47
  -2  10  -7    1.15    4.25
  -2  10  -7    1.55    5.71
   2 -10   7    2.84    5.43
  -2  10  -7   -1.38    4.86
   2 -10   7   -3.16    3.84
   2 -10   7    0.87    2.77
  -2  10  -8   -1.07    3.41
   2 -10   8   -0.82    2.60
  -2  10  -8    1.41    6.37
   2 -10   8    2.68    4.71
   2 -10   8    1.38    2.43
   2 -10   9   -0.55    3.01
  -2  10  -9    1.68    2.68
   2 -10   9    2.16    2.64
  -2  10  -9    1.19    5.04
   2 -10   9    3.27    3.84
   2 -10   9    2.35    3.73
   2 -10   9    0.98    2.76
  -2 -10  -9    1.48    3.14
   2 -10  10 1301.65  109.52
   2 -10  10 1257.99  106.92
  -2 -10 -10 1231.73  106.80
   2 -10  10 1184.34  107.96
  -2  10 -10 1244.19  108.64
  -2  10 -11    7.22    3.39
   2 -10  11   16.24    4.44
   2 -10  11   13.68    3.42
  -2 -10 -11    7.14    2.60
  -2  10 -11   10.99    2.85
   2 -11 -12    1.26    1.16
   2  11 -11   -0.50    1.84
   2 -11 -11   -0.81    2.24
   2  11 -10   23.46    5.48
   2 -11 -10   20.67    4.68
   2 -11  -9  446.74   43.68
   2  11  -9  516.75   45.82
   2  11  -9  493.26   45.37
  -2 -11   9  455.23   45.69
   2 -11  -8   95.16   12.64
  -2 -11   8   86.48   13.93
  -2 -11   8   90.65   14.10
   2  11  -8   94.98   13.75
   2  11  -8  116.98   14.81
  -2 -11   7    2.98    3.50
   2  11  -7    3.22    4.11
  -2 -11   7   -2.72    3.82
  -2 -11   7    1.20    3.39
   2 -11  -7    3.95    3.84
  -2  11   7    2.74    5.66
   2 -11  -6  398.95   41.04
   2  11  -6  479.72   44.03
  -2 -11   6  435.04   42.80
  -2 -11   6  449.71   45.94
  -2  11   5   14.89    4.91
  -2 -11   5   16.06    6.95
  -2  11   5    8.56    5.63
  -2 -11   5    3.12    4.48
   2  11  -5   17.49    8.01
   2  11  -5   10.16    9.55
  -2 -11   5   14.88    5.48
  -2  11   4   53.58    9.49
  -2 -11   4   59.38   14.13
  -2 -11   4   41.93   10.74
   2  11  -4   59.56   16.99
   2  11  -4   47.22   12.79
  -2 -11   4   50.02    9.57
  -2  11   3  280.95   31.20
  -2  11   3  349.60   32.19
   2  11  -3  281.73   41.36
  -2 -11   3  253.06   36.73
  -2  11   2  299.58   29.83
   2  11  -2  300.95   40.34
   2 -11  -2  251.71   28.78
  -2 -11   2  273.67   30.62
  -2 -11   2  294.20   32.41
  -2  11   2  269.99   28.76
  -2  11   1  307.26   29.49
  -2  11   1  258.97   30.04
  -2  11   1  264.66   29.22
   2  11  -1  296.20   38.51
   2 -11  -1  244.17   29.52
  -2 -11   1  318.68   32.64
  -2 -11   1  282.81   30.34
   2  11   0  104.63   18.93
  -2  11   0   99.64   18.69
  -2 -11   0   91.68   14.14
   2 -11   0  111.83   15.74
  -2  11   0  105.14   13.95
  -2  11   0   96.42   14.75
  -2 -11   0  112.77   21.59
  -2  11  -1  149.30   24.85
  -2 -11  -1  149.04   28.11
  -2  11  -1  191.63   20.60
  -2 -11  -1  180.76   21.31
  -2  11  -1  165.78   22.85
  -2  11  -1  171.94   21.23
  -2  11  -2  394.67   40.54
   2 -11   2  392.50   39.16
  -2  11  -2  424.17   41.41
  -2  11  -2  378.49   42.43
  -2  11  -2  402.39   41.59
  -2 -11  -2  446.88   53.37
  -2  11  -2  422.45   39.66
  -2  11  -2  363.91   39.26
  -2 -11  -2  401.42   40.58
  -2  11  -2  429.41   48.55
   2 -11   3  310.01   31.12
  -2  11  -3  311.94   33.58
  -2  11  -3  298.80   32.23
  -2 -11  -3  366.90   46.37
  -2  11  -3  315.78   31.53
  -2  11  -3  319.72   32.68
  -2 -11  -3  264.21   31.39
  -2  11  -3  251.56   37.50
  -2 -11  -4   87.73   13.78
  -2 -11  -4   93.03   12.81
   2 -11   4  102.97   13.44
  -2  11  -4   94.09   15.12
  -2  11  -4  113.67   16.67
  -2 -11  -4  140.90   25.95
  -2  11  -4  115.21   15.90
   2 -11   4   63.54   12.72
  -2  11  -4  112.06   14.05
  -2  11  -4   78.90   17.75
  -2 -11  -5  108.72   15.41
  -2  11  -5  151.87   18.73
   2 -11   5  107.91   14.19
  -2  11  -5  122.60   17.31
   2 -11   5   94.52   15.34
  -2 -11  -5   99.29   13.52
  -2  11  -5  121.22   15.12
  -2  11  -5  113.35   17.07
  -2  11  -6  678.30   65.88
   2 -11   6  670.47   62.50
  -2  11  -6  762.61   67.02
  -2 -11  -6  662.94   63.69
  -2  11  -6  776.98   66.46
  -2  11  -6  749.41   63.99
   2 -11   6  589.08   64.44
  -2  11  -7   40.41    9.16
   2 -11   7   33.56    6.59
  -2  11  -7   46.21   10.10
   2 -11   7   41.49    9.22
  -2 -11  -7   39.61    7.94
  -2  11  -7   37.23    7.31
  -2  11  -7   49.17    9.46
   2 -11   8  160.52   18.49
  -2  11  -8  201.83   22.24
   2 -11   8  166.81   21.56
  -2  11  -8  174.53   22.08
   2 -11   8  217.90   23.28
  -2  11  -8  190.33   21.09
  -2  11  -8  205.23   20.43
  -2  11  -9  287.47   28.71
  -2  11  -9  295.34   28.37
   2 -11   9  286.77   29.61
   2 -11   9  310.42   30.69
  -2  11  -9  294.02   30.52
  -2 -11 -10   26.81    4.87
   2 -11  10   26.89    5.18
  -2  11 -10   24.18    4.39
  -2  11 -11   41.96    4.90
  -2 -11 -11   31.12    3.72
   2  12 -11    2.19    2.12
   2  12 -11    4.57    2.44
   2  12 -11    6.58    2.07
   2  12 -10  236.86   18.71
   2  12 -10  267.58   19.33
   2  12 -10  284.36   20.40
   2 -12 -10  234.11   16.86
   2 -12  -9  118.44   13.14
   2  12  -9  117.97   14.47
   2  12  -9  134.27   14.91
   2  12  -8    3.39    3.71
   2  12  -8    3.26    3.00
   2 -12  -8    2.19    2.60
   2  12  -8   -0.57    2.10
   2 -12  -7  223.93   23.85
   2  12  -7  289.62   26.75
  -2 -12   7  242.84   27.20
   2  12  -7  236.81   25.98
   2  12  -7  233.01   25.08
  -2  12   7  244.69   25.62
   2  12  -6  195.57   21.61
  -2 -12   6  157.27   20.06
  -2 -12   6  187.64   22.82
  -2  12   5 1164.62  103.54
  -2 -12   5 1111.14  104.02
  -2 -12   5 1289.16  107.51
  -2  12   4  125.00   15.64
  -2 -12   4  113.51   17.04
  -2 -12   4   92.25   14.38
  -2  12   3   55.85    9.13
  -2  12   3   43.22    8.11
  -2 -12   3   36.11    8.40
  -2 -12   3   29.66    7.68
  -2  12   2    3.00    3.00
  -2  12   2    1.12    3.15
  -2  12   2    6.45    4.27
   2 -12  -2    0.91    2.72
  -2 -12   2    1.09    2.84
  -2 -12   2    6.74    4.75
   2  12  -2    2.59    4.77
  -2  12   1  587.17   54.36
  -2  12   1  546.63   52.47
  -2  12   1  644.38   54.24
  -2  12   1  580.74   55.02
   2 -12  -1  481.49   52.77
  -2  12   0   21.93    6.03
  -2  12   0   36.97    8.11
   2 -12   0   28.27    7.53
  -2  12   0   22.71    6.19
  -2  12   0   11.80    6.19
  -2 -12  -1  503.71   48.69
  -2  12  -1  535.85   48.07
  -2  12  -1  454.15   48.31
  -2  12  -1  524.18   50.92
   2 -12   1  494.71   49.90
   2 -12   2    4.11    5.04
  -2  12  -2    4.51    5.35
  -2  12  -2    2.77    5.10
  -2  12  -2    1.10    2.87
   2 -12   2    6.18    3.52
  -2 -12  -2    7.33    4.72
  -2  12  -2    2.78    2.97
  -2  12  -3   15.74    5.40
   2 -12   3   24.13    7.67
  -2  12  -3    9.65    5.43
  -2 -12  -3   19.60    5.98
  -2  12  -3   22.65    6.23
   2 -12   3   18.95    5.22
  -2  12  -3   19.34    5.29
  -2 -12  -4   65.61   10.63
   2 -12   4   55.65   11.73
   2 -12   4   51.09    9.33
  -2  12  -4   68.27   11.08
  -2 -12  -4   54.07    8.83
  -2  12  -4   65.87   12.20
   2 -12   4   58.04    9.28
  -2  12  -4   45.65    9.77
  -2  12  -4   65.74   10.03
  -2  12  -5  542.17   49.31
  -2 -12  -5  482.06   49.28
  -2  12  -5  576.74   51.09
   2 -12   5  563.97   53.06
   2 -12   5  469.86   49.49
   2 -12   5  513.22   48.38
  -2  12  -5  510.63   50.67
  -2  12  -5  579.52   52.16
  -2  12  -6    7.27    4.59
   2 -12   6   11.02    3.50
  -2  12  -6   13.59    5.80
  -2  12  -6    7.10    4.97
   2 -12   6   12.51    5.15
  -2 -12  -6   12.61    4.59
  -2  12  -6    2.37    2.59
  -2  12  -7   41.41    8.28
   2 -12   7   33.23    5.79
  -2 -12  -7   28.31    6.61
  -2  12  -7   51.22    9.04
   2 -12   7   40.95    8.00
   2 -12   7   42.38    8.92
  -2  12  -7   42.05    6.96
  -2  12  -7   53.48    9.02
  -2  12  -8    1.53    3.14
  -2  12  -8    3.44    2.63
  -2 -12  -8    0.59    2.58
  -2  12  -8    6.33    4.28
   2 -12   8    2.53    2.97
  -2  12  -8   -0.56    2.22
  -2  12  -9   21.00    3.82
   2 -12   9   19.86    4.47
  -2  12  -9   18.75    3.65
  -2  12  -9   14.88    4.23
   2 -12  10  149.49   14.69
   2  13 -10    2.19    1.56
  -2  13  10    0.28    1.08
   2  13  -9  435.32   25.06
   2  13  -9  454.16   25.37
   2  13  -9  478.85   24.96
   2  13  -8    5.27    3.38
   2  13  -8    7.68    2.97
   2  13  -8    7.58    3.76
  -2 -13   8    1.63    3.14
  -2 -13   7    1.86    2.80
   2  13  -7    6.91    3.74
   2  13  -7    2.05    2.52
   2  13  -7    2.44    2.60
   2  13  -6   30.03    6.00
  -2  13   6   27.69    6.81
   2  13  -6   32.49    6.38
  -2  13   5   22.88    6.81
  -2 -13   5   27.61    6.29
   2  13  -5   28.98    6.81
  -2 -13   5   17.44    5.89
  -2  13   4    9.53    4.32
  -2  13   4    7.40    3.63
  -2 -13   4    9.15    4.21
  -2 -13   4    5.67    4.04
   2  13  -4    0.94    3.34
  -2  13   3  413.31   41.19
  -2 -13   3  450.26   42.05
  -2  13   3  457.02   42.16
  -2 -13   3  387.98   41.26
  -2 -13   2    0.91    2.37
  -2  13   2    3.52    3.50
  -2  13   2    4.03    3.86
  -2 -13   2    1.97    2.96
  -2  13   2    5.50    3.77
   2 -13  -1  533.31   54.59
  -2  13   1  527.75   55.14
  -2  13   1  622.45   56.10
  -2  13   1  710.52   56.38
   2 -13   0   24.88    6.60
  -2  13   0   31.12    9.44
  -2  13   0   22.19    6.63
  -2  13   0    9.56    4.46
  -2  13   0   25.20    6.77
  -2  13  -1  757.35   61.89
   2 -13   1  675.67   63.12
  -2  13  -1  774.80   62.98
  -2  13  -1  749.97   64.36
  -2  13  -1  662.12   63.05
  -2  13  -1  572.09   61.42
   2 -13   1  581.91   60.42
  -2  13  -2    4.91    3.15
  -2  13  -2    3.52    4.84
  -2  13  -2    4.76    5.82
   2 -13   2    5.93    4.89
  -2  13  -2    7.71    4.11
   2 -13   2    3.12    2.89
  -2  13  -3  497.26   46.22
  -2 -13  -3  500.70   46.63
   2 -13   3  484.22   45.35
  -2 -13  -3  412.35   44.57
  -2  13  -3  531.22   46.11
   2 -13   3  553.23   49.18
  -2  13  -4   33.29    8.44
   2 -13   4   17.93    4.74
  -2 -13  -4   24.56    5.10
   2 -13   4   34.17    8.59
  -2 -13  -4   30.91    6.89
  -2  13  -4   44.31    7.04
  -2  13  -5    8.22    3.32
  -2  13  -5   14.47    5.46
   2 -13   5    2.20    3.36
  -2  13  -5   10.37    4.21
   2 -13   5    6.26    2.78
  -2 -13  -5   19.74    5.20
   2 -13   6    6.69    2.42
  -2 -13  -6    7.26    3.25
  -2  13  -6    5.33    2.57
  -2  13  -7  122.29   13.14
   2 -13   7   98.85   13.25
  -2  13  -7  102.42   12.77
  -2 -13  -7  103.85   12.20
  -2  13  -7  101.56   11.73
  -2  13  -8    8.85    2.69
  -2 -13  -8    5.25    2.33
   2 -13   8   15.15    3.73
  -2  13  -8    9.33    3.09
  -2  13  -8    7.56    2.20
   2 -13   8    9.69    3.20
   2 -13   9  177.99   18.48
  -2  13  -9  217.28   18.45
   2  14  -9   28.20    3.87
  -2  14   8    1.76    1.63
  -2 -14   8    0.89    1.42
   2  14  -8    0.44    1.85
  -2 -14   7   15.79    4.36
   2  14  -7   22.79    4.13
  -2  14   7   27.19    4.78
   2  14  -6   80.88   10.50
  -2  14   6  105.35   11.42
  -2  14   6  104.76   11.24
   2  14  -5  863.66   59.26
  -2  14   5  788.42   58.91
   2  14  -5  814.22   58.95
  -2 -14   5  710.58   58.27
  -2  14   5  686.51   57.90
  -2 -14   4    3.04    3.02
   2  14  -4    3.66    3.01
  -2  14   4    2.96    3.04
  -2 -14   4   -0.71    2.28
  -2  14   3   49.40    8.20
   2  14  -3   62.58    9.30
  -2 -14   3   46.57    8.43
  -2  14   3   72.81   11.05
  -2  14   3   56.30    8.92
  -2  14   2   17.23    4.80
   2  14  -2   14.65    4.44
  -2 -14   2   22.27    5.61
  -2  14   2   21.50    7.12
  -2  14   2    8.86    4.02
   2 -14  -1  403.57   41.02
  -2  14   1  450.97   41.92
  -2  14   1  476.09   42.39
  -2 -14   1  433.52   42.13
  -2  14   1  462.32   43.62
   2 -14   0   25.09    6.00
  -2  14   0   34.43    6.52
  -2  14   0   28.86    6.30
   2 -14   0   23.64    5.37
  -2  14   0   24.60    7.69
  -2  14   0   27.17    6.63
   2 -14   1  260.29   28.03
   2 -14   1  237.31   26.25
  -2  14  -1  329.86   28.60
  -2  14  -1  288.97   28.81
  -2  14  -1  264.37   28.24
   2 -14   2    4.63    3.69
  -2 -14  -2    1.88    2.12
   2 -14   2    3.56    2.46
  -2  14  -2    2.71    3.34
  -2  14  -2    4.95    4.51
  -2  14  -2    4.75    3.26
   2 -14   3    2.14    2.06
  -2  14  -3    3.79    2.91
   2 -14   3    1.85    2.95
  -2  14  -3    4.10    2.42
   2 -14   4   -0.44    1.77
  -2  14  -4    2.81    2.47
   2 -14   4    4.39    3.36
  -2  14  -4    2.11    1.94
   2 -14   5  509.01   48.51
  -2  14  -5  564.31   50.69
  -2  14  -5  604.72   49.71
   2 -14   5  629.46   52.33
  -2  14  -6    6.14    2.62
  -2  14  -6   13.85    3.67
  -2  14  -6   11.97    2.59
   2 -14   7   29.71    4.42
  -2  14  -7   21.12    3.41
   2  15  -7    6.43    1.90
  -2  15   6  116.68   11.30
   2  15  -6  101.01   11.65
   2  15  -6  114.66   11.36
  -2  15   5   85.22    9.77
   2  15  -5   96.09   10.46
  -2 -15   5   98.47   10.44
   2  15  -5   72.37    9.88
  -2  15   5   88.51   10.62
  -2 -15   4    7.35    2.95
   2  15  -4    5.87    2.71
  -2  15   4    6.44    2.65
   2  15  -4   11.74    3.89
  -2  15   3  140.33   15.84
  -2 -15   3  150.75   15.27
  -2  15   3  160.26   15.15
   2 -15  -3  111.58   13.54
  -2  15   2  197.59   19.24
  -2  15   2  206.09   17.99
  -2 -15   2  191.60   18.21
   2 -15  -2  148.05   16.42
  -2  15   2  129.35   16.46
  -2  15   1  123.58   14.00
  -2 -15   1  120.52   13.07
   2 -15  -1   94.38   11.47
  -2  15   1  101.20   12.35
  -2  15   0   16.45    5.44
   2 -15   0   14.19    3.25
  -2 -15   0   13.14    3.81
  -2  15   0   11.56    3.37
  -2  15  -1   75.63    9.68
   2 -15   1   91.36   10.36
   2 -15   1   73.00    8.65
  -2 -15  -1   76.29    9.69
  -2  15  -1   74.72    9.92
  -2  15  -1   74.39   10.04
  -2 -15  -1   62.35    8.87
  -2  15  -2  138.15   14.69
   2 -15   2  134.55   15.00
   2 -15   2  119.02   13.07
  -2 -15  -2  133.96   13.68
  -2  15  -2  169.98   15.89
  -2  15  -2  123.45   13.72
  -2  15  -3  154.82   15.59
  -2  15  -3  131.19   14.65
   2 -15   3  128.43   15.16
  -2  15  -4    6.31    2.56
   2 -15   4   17.63    4.04
  -2  15  -5  119.52   10.47
   2 -15   5  110.42   10.37
   2 -15   6   83.38    8.77
  -2 -16   4   21.67    3.25
   2  16  -4   23.89    3.53
  -2 -16   3   20.74    3.25
  -2 -16   3   13.04    2.98
   2  16  -3   15.99    3.42
  -2  16   3   20.95    3.92
  -2 -16   2    2.37    1.57
  -2 -16   2   -0.36    1.26
  -2  16   2    4.22    2.94
   2  16  -2    1.59    1.88
  -2 -16   1   52.33    6.09
  -2  16   1   54.44    6.70
  -2 -16   0   19.11    3.40
  -2 -16   0   13.08    2.74
   2  16   0   16.55    3.46
  -2  16   0   17.41    3.58
  -2 -16  -1   55.10    6.55
  -2 -16  -2    4.94    1.68
  -2  16  -3    0.31    1.24
  -3   0  16    0.84    1.34
  -3   0  16    1.80    1.66
  -3   0  15  881.99   54.07
  -3   0  15  378.76   50.11
  -3   0  14   -2.20    6.18
  -3   0  13 1236.91  112.44
  -3   0  12   -2.39    3.11
  -3   0  12    1.78    5.67
   3   0 -12   -0.80    2.42
   3   0 -11   13.42    4.82
  -3   0  11   20.03    9.82
  -3   0  11   20.74    6.72
  -3   0  11   11.47    6.09
  -3   0  10    2.29    2.72
  -3   0  10   -2.19    3.28
  -3   0  10   -3.15    6.69
   3   0 -10    1.71    1.81
  -3   0  10    2.10    7.37
  -3   0   9  774.58   77.56
  -3   0   9  752.47   76.05
  -3   0   9  733.36   70.65
  -3   0   9  782.18   70.59
  -3   0   9  690.46   81.86
  -3   0   9  824.51   72.97
  -3   0   8    2.76    5.08
  -3   0   8   -1.73    2.60
  -3   0   7  825.26   83.05
  -3   0   7  816.12   77.82
  -3   0   6    3.86    6.15
  -3   0   6   -1.24    2.29
  -3   0   5  181.74   27.02
  -3   0   4   -1.67    3.95
  -3   0   4    1.72    2.04
  -3   0   3  396.98   35.18
  -3   0   3  317.71   32.70
  -3   0   3  394.42   39.00
  -3   0   3  443.52   40.29
  -3   0   2    2.15    1.61
  -3   0   2    0.61    1.71
  -3   0   2   -1.23    3.69
  -3   0   2   -1.11    3.54
  -3   0   2    1.18    3.95
  -3   0   1  583.09   54.85
  -3   0   1  570.54   55.37
  -3   0   0   -1.18    3.75
  -3   0   0   -1.08    4.30
  -3   0  -1   -2.16    4.13
  -3   0  -1   -1.32    3.96
  -3   0  -1   -0.63    1.91
  -3   0  -2    1.08    3.44
  -3   0  -2   -4.82    5.39
  -3   0  -2    0.88    2.10
  -3   0  -3   35.10   11.99
  -3   0  -3   35.42   11.21
  -3   0  -3   40.07    8.39
  -3   0  -3   30.57    7.38
  -3   0  -4    2.91    6.91
  -3   0  -4   -2.77    7.20
  -3   0  -4    2.76    3.27
  -3   0  -5  400.61   52.05
  -3   0  -5  383.22   39.63
  -3   0  -5  250.46   45.34
  -3   0  -6    4.77   10.12
  -3   0  -6   -0.75    2.10
  -3   0  -6   -0.70    3.22
  -3   0  -6   -1.89    2.84
  -3   0  -6   -4.54   10.77
  -3   0  -7 1497.13  127.30
  -3   0  -7 1455.98  128.07
  -3   0  -7 1354.97  154.80
  -3   0  -7 1529.88  136.78
  -3   0  -7 1320.95  152.39
  -3   0  -8   -1.33    3.46
  -3   0  -8    1.13    3.16
  -3   0  -8    6.04   11.10
  -3   0  -8    2.66    3.26
  -3   0  -8   -2.39    3.58
  -3   0  -8  -11.50   12.20
  -3   0  -9  455.53   66.07
  -3   0  -9  431.74   45.38
  -3   0  -9  326.42   37.39
  -3   0  -9  300.37   43.50
  -3   0  -9  411.01   39.96
  -3   0  -9  375.83   61.78
  -3   0 -10    5.35    9.82
  -3   0 -10    1.82    7.46
  -3   0 -10   -1.15    3.46
  -3   0 -10    1.24    4.38
  -3   0 -10    5.62   10.33
  -3   0 -10    2.57    2.73
  -3   0 -11 1843.80  173.73
  -3   0 -11 2327.00  179.27
  -3   0 -12   -1.70    3.94
  -3   0 -12    1.19    4.71
  -3   0 -13   16.15    4.23
  -3   0 -13   16.38    5.45
  -3   0 -14   -1.37    2.28
  -3   1  16    1.04    1.22
  -3  -1  16    2.96    2.16
  -3   1  16   -0.38    1.27
  -3  -1  16   -1.23    1.37
  -3   1  15   45.22    8.23
  -3  -1  15   33.70    7.92
  -3  -1  15   61.48    9.04
  -3   1  14    1.27    3.59
   3   1 -14    8.21    2.95
  -3  -1  14    1.12    4.60
   3   1 -13   34.76    7.29
  -3  -1  13   58.56   10.06
  -3  -1  13   59.30   12.04
  -3  -1  12  163.87   22.53
   3   1 -12  114.08   15.63
  -3   1  11 1131.96   99.15
  -3  -1  11 1363.06  107.23
   3   1 -11 1018.55   97.13
   3   1 -11 1058.85  102.99
  -3   1  11 1163.50  107.44
  -3  -1  11 1097.54  105.13
  -3   1  11  885.66  110.80
  -3   1  10   55.31   10.40
  -3  -1  10   49.44    9.57
  -3  -1  10   68.73   15.40
  -3   1  10   50.91   17.28
  -3   1  10   53.01   13.77
  -3  -1  10   86.07   15.98
  -3   1   9  357.07   45.84
  -3  -1   9  441.63   46.70
  -3  -1   9  453.64   48.42
  -3  -1   9  447.75   41.77
  -3  -1   9  374.46   41.05
  -3   1   9  412.43   41.83
   3  -1  -9  382.38   43.29
  -3  -1   9  519.26   44.75
  -3   1   9  377.86   54.97
  -3   1   8    3.54    6.50
   3  -1  -8    1.24    1.86
  -3  -1   8   -1.67    2.50
  -3  -1   8    1.78    7.78
  -3   1   8    1.79    6.58
  -3  -1   7  532.56   53.96
  -3   1   7  563.22   63.89
  -3  -1   6  742.41   72.26
  -3   1   6  861.30   82.08
  -3   1   5   41.34   11.77
   3   1  -5   42.99    6.22
  -3  -1   5   48.53   12.34
  -3  -1   5   36.99    7.94
   3   1  -4   79.60    8.89
  -3  -1   4   75.32   10.60
  -3  -1   4  105.51   16.05
  -3  -1   3  121.33   17.82
   3   1  -3  118.17   10.79
  -3  -1   3  129.40   16.60
  -3   1   3   89.56   10.56
  -3   1   3  114.72   13.60
  -3  -1   3  116.63   13.72
  -3  -1   3  108.16   12.69
  -3  -1   2 1238.78  105.69
  -3  -1   2 1247.25  107.12
  -3   1   2 1145.99  105.53
  -3  -1   2 1297.34  107.19
  -3  -1   2 1108.61  101.51
  -3   1   2 1181.16  102.08
  -3  -1   1  173.37   19.22
  -3  -1   1  162.38   19.99
  -3   1   1  137.43   15.25
  -3  -1   0  248.35   27.98
  -3   1   0  246.89   27.85
  -3  -1  -1   13.61    6.49
  -3   1  -1    7.94    2.93
  -3  -1  -1    5.33    2.98
  -3   1  -1   10.35    6.01
  -3  -1  -2  141.74   20.10
  -3  -1  -2  133.31   16.36
  -3   1  -2  107.76   14.63
  -3   1  -2  127.37   17.25
  -3  -1  -3 2547.49  235.14
  -3   1  -3 3044.27  230.11
  -3  -1  -3 2461.57  228.90
  -3   1  -3 2547.20  228.30
  -3  -1  -3 2817.72  237.22
  -3  -1  -4    2.78    6.60
  -3  -1  -4    4.30    3.74
  -3   1  -4    5.46    4.11
  -3   1  -4    3.51    3.53
  -3  -1  -4    2.93    7.61
  -3  -1  -5   28.69   13.46
  -3   1  -5   35.98    9.25
  -3  -1  -5   30.07    8.74
  -3   1  -5   31.12    7.73
  -3  -1  -5   45.26   16.23
  -3  -1  -6    3.84    4.08
  -3   1  -6    1.91    2.88
  -3  -1  -6    2.94    2.60
  -3   1  -6    2.26    3.20
  -3  -1  -6    2.61    2.41
  -3  -1  -6   13.24   14.04
  -3   1  -7 1217.19  126.19
  -3  -1  -7 1458.57  135.19
  -3   1  -7 1710.35  137.71
  -3  -1  -7 2087.15  166.86
  -3   1  -7 1599.42  128.08
  -3  -1  -7 1665.94  129.66
  -3  -1  -7 1449.76  125.94
  -3   1  -7 1512.68  128.83
  -3  -1  -7 1433.51  127.75
  -3  -1  -7 1656.52  156.55
  -3   1  -7 1374.92  126.57
  -3  -1  -7 1380.40  126.24
  -3  -1  -8    2.38    3.58
  -3   1  -8    4.85    4.46
  -3  -1  -8  -11.45   19.21
  -3  -1  -8    1.18    3.76
  -3  -1  -8    5.45   11.57
  -3  -1  -8   -1.09    3.66
  -3   1  -8    2.96    4.19
  -3   1  -8   -0.96    3.39
  -3  -1  -8    2.43    2.98
  -3   1  -8   -1.01    3.22
  -3  -1  -9  194.17   40.04
  -3  -1  -9  180.19   25.72
  -3  -1  -9  145.85   19.65
  -3  -1  -9  173.89   38.75
  -3   1  -9  168.24   26.60
  -3  -1  -9  121.39   23.68
  -3   1  -9  158.30   21.69
  -3  -1  -9  171.56   20.71
  -3  -1 -10   95.10   27.67
  -3  -1 -10   88.70   16.40
  -3   1 -10   97.09   14.13
  -3   1 -10   67.75   16.50
  -3  -1 -10   86.36   18.06
  -3  -1 -10   58.08   11.64
  -3   1 -10   78.92   13.92
  -3  -1 -10  145.75   31.77
  -3  -1 -11  109.47   17.19
  -3  -1 -11   94.29   13.62
  -3   1 -11  100.95   14.96
  -3   1 -11   83.79   13.54
  -3  -1 -12    1.11    5.16
  -3  -1 -12    9.11    4.12
  -3   1 -12    1.86    3.70
  -3  -1 -13  318.55   30.97
  -3   1 -13  361.32   30.50
  -3  -1 -13  270.37   28.57
  -3  -1 -14   37.84    5.33
  -3   1 -14   27.93    4.26
  -3   1 -14   25.19    4.08
  -3  -2  16   25.73    4.66
  -3   2  15   89.42   11.53
  -3  -2  15  100.70   13.58
  -3  -2  15   79.54   11.56
  -3   2  15   82.26   11.21
   3   2 -14  160.49   15.67
  -3   2  14   99.06   16.61
  -3   2  14  130.27   16.76
  -3  -2  14  141.03   18.21
  -3   2  13  417.60   43.40
  -3  -2  13  512.47   46.27
   3   2 -13  423.13   40.89
  -3  -2  13  390.71   40.76
  -3   2  12    7.59    6.03
  -3  -2  12   -3.46    5.51
   3   2 -12    1.03    3.09
  -3  -2  11   43.36    8.70
  -3   2  11   42.27   17.04
  -3   2  11   32.48   11.01
  -3  -2  11   33.64   10.17
  -3   2  11   27.43   10.07
  -3  -2  11   29.01   15.68
  -3   2  11   47.30   17.33
  -3  -2  11   36.34   11.68
  -3  -2  10  780.02   74.84
  -3  -2  10  796.72   74.04
  -3   2  10  807.20   79.13
  -3  -2  10  987.19   82.43
  -3   2  10  646.57   90.36
  -3   2  10  826.57   83.27
  -3  -2  10  797.16   80.18
  -3  -2   9  119.93   16.11
  -3  -2   9  115.79   16.63
  -3   2   9  157.08   18.11
  -3  -2   9  128.36   15.04
  -3  -2   9  137.98   21.49
  -3   2   9  151.04   21.85
  -3  -2   9  122.94   20.11
  -3   2   9  104.84   27.68
  -3  -2   9  114.93   17.20
  -3  -2   8  560.99   55.93
  -3   2   8  473.90   67.98
  -3   2   8  498.04   55.25
  -3  -2   8  615.43   57.06
  -3  -2   7  940.82   83.85
  -3   2   7  739.14   93.78
   3   2  -7  902.11   79.96
  -3  -2   6 1280.12  115.96
  -3   2   6 1199.91  126.65
  -3  -2   6 1507.12  126.77
  -3   2   6 1155.77  123.88
   3   2  -6 1324.18  112.78
  -3  -2   5    4.25    3.01
  -3   2   5    7.29    6.84
  -3  -2   5    9.72    5.85
  -3   2   5    4.28    5.10
   3   2  -5    4.85    2.44
  -3   2   4  233.22   31.61
  -3  -2   4  349.46   34.00
   3   2  -4  284.14   26.36
  -3  -2   4  233.85   28.10
  -3  -2   4  307.69   28.78
  -3   2   3  668.81   64.48
  -3  -2   3  753.67   64.52
  -3   2   3  622.79   63.16
  -3  -2   3  658.38   60.46
  -3   2   2  438.29   43.25
  -3  -2   2  474.73   43.21
  -3   2   2  438.51   43.19
  -3  -2   2  404.04   43.59
  -3   2   2  456.99   44.17
  -3  -2   2  401.25   40.06
  -3   2   2  428.41   39.70
  -3   2   1  691.83   64.58
  -3   2   1  725.82   65.15
  -3  -2   1  697.22   64.11
  -3  -2   1  705.34   65.92
  -3  -2   1  709.95   65.64
  -3   2   1  730.53   64.92
  -3  -2   1  676.09   62.10
  -3   2   1  662.94   60.38
  -3  -2   0  230.91   24.65
  -3   2   0  175.52   22.26
  -3   2   0  175.22   23.31
  -3  -2  -1   25.13    8.09
  -3   2  -1   22.09    6.77
  -3   2  -1   12.37    3.28
  -3   2  -1   26.39    8.27
  -3  -2  -2 2101.84  191.85
  -3   2  -2 2010.03  189.66
  -3   2  -2 2646.05  195.35
  -3  -2  -2 2413.96  197.08
  -3   2  -2 2317.22  195.18
  -3  -2  -3  465.56   48.45
  -3  -2  -3  454.23   51.85
  -3   2  -3  456.05   50.78
  -3   2  -3  453.71   46.14
  -3  -2  -3  485.22   47.84
  -3   2  -3  519.24   48.71
  -3   2  -4  157.53   20.60
  -3   2  -4  146.32   20.12
  -3  -2  -4  146.73   20.52
  -3  -2  -4  116.90   20.12
  -3   2  -4  169.53   26.49
  -3  -2  -4  161.18   27.51
  -3  -2  -4  164.05   27.19
  -3   2  -4  126.82   23.38
  -3   2  -5    1.68    3.57
  -3  -2  -5    1.75    2.64
  -3   2  -5    3.40    6.25
  -3  -2  -5    3.48    5.85
  -3  -2  -5    3.38    7.18
  -3   2  -5   -3.19    5.86
  -3   2  -5    9.31    4.68
  -3  -2  -5    3.56    7.55
  -3   2  -5   -3.36    7.12
  -3  -2  -6  967.46  101.30
  -3   2  -6  868.43   98.35
  -3   2  -6  779.64   79.08
  -3  -2  -6 1005.83  100.66
  -3   2  -6  744.38   94.55
  -3  -2  -6  845.21   76.83
  -3   2  -6  969.78   78.10
  -3   2  -6  885.51   85.03
  -3  -2  -6  827.14   84.26
  -3   2  -7  557.42   63.90
  -3   2  -7  778.58   73.35
  -3  -2  -7  694.20   71.64
  -3  -2  -7  927.96   93.98
  -3   2  -7  721.64   88.51
  -3   2  -7  643.23   63.99
  -3  -2  -7  791.83   65.52
  -3  -2  -7  845.81   89.81
  -3   2  -7  426.67   76.93
  -3   2  -7  632.61   64.90
  -3  -2  -7  696.69   62.27
  -3   2  -7  738.96   64.67
  -3  -2  -7  920.99   72.15
  -3   2  -7  563.88   67.42
  -3  -2  -7  751.25   63.46
  -3   2  -7  725.69   64.26
  -3   2  -8    3.20    3.20
  -3   2  -8    2.17    3.65
  -3   2  -8   -2.50    5.31
  -3  -2  -8    2.41    2.57
  -3  -2  -8  -15.51   25.13
  -3   2  -8  -11.19   23.73
  -3  -2  -8   -4.92   10.44
  -3   2  -8    5.31    9.77
  -3  -2  -8    8.11    3.83
  -3   2  -8    6.35    4.47
  -3  -2  -8   16.94    8.24
  -3   2  -8    3.66    6.14
  -3  -2  -8    2.13    3.21
  -3  -2  -9   68.35   15.95
  -3   2  -9   76.87   17.10
  -3  -2  -9   57.67   10.53
  -3  -2  -9   73.26   23.10
  -3   2  -9    5.44   21.37
  -3  -2  -9   87.31   27.67
  -3   2  -9   51.47   22.41
  -3   2  -9   57.62   13.81
  -3  -2  -9   68.53   14.13
  -3   2  -9   49.99   10.03
  -3   2  -9   60.81   10.63
  -3  -2 -10   66.19   11.13
  -3   2 -10   94.39   15.09
  -3   2 -10   60.60   14.38
  -3  -2 -10   84.24   15.08
  -3   2 -10   35.75   17.29
  -3  -2 -10   85.85   23.24
  -3  -2 -10  113.89   27.28
  -3   2 -10   69.81   23.53
  -3   2 -10   74.06   16.93
  -3  -2 -10   62.81   15.28
  -3   2 -11  905.32   75.01
  -3  -2 -11  770.72   71.01
  -3  -2 -11  774.00   73.76
  -3   2 -11  714.14   74.24
  -3   2 -12   27.62    7.33
  -3  -2 -12   33.30    6.24
  -3   2 -12   28.24    7.92
  -3  -2 -12   35.92    8.60
  -3   2 -13   32.80    6.33
  -3  -2 -13   31.17    6.63
  -3   2 -13   33.70    7.13
  -3   2 -14   55.04    6.66
  -3   2 -14   54.88    6.46
  -3   2 -14   51.07    6.96
  -3  -2 -14   57.46    6.93
   3   3 -15   27.78    4.37
  -3  -3  15   20.04    5.37
  -3   3  15   29.90    5.13
  -3  -3  14    4.73    2.39
   3   3 -14    5.85    3.12
  -3   3  14    4.73    3.20
  -3   3  14    3.55    3.68
  -3  -3  14   12.99    5.16
   3   3 -13   18.14    5.71
  -3   3  13   23.51    7.07
  -3  -3  13   15.63    6.34
  -3   3  13   16.20    6.01
   3   3 -13   15.50    4.14
   3   3 -12  175.44   22.10
   3   3 -12  183.24   20.55
  -3   3  12  193.94   25.08
  -3   3  12  194.64   23.88
  -3  -3  12  205.45   25.54
  -3  -3  11  127.68   19.43
  -3  -3  11  187.80   20.52
  -3   3  11  193.53   28.16
  -3   3  11  166.34   22.18
  -3   3  11  154.07   30.29
  -3  -3  11  218.12   37.31
  -3  -3  11  165.26   23.62
   3   3 -11  146.56   18.09
  -3   3  11  117.82   30.17
  -3  -3  10    1.25    3.24
  -3  -3  10    1.05    2.23
  -3   3  10   -1.58    5.30
  -3  -3  10   -1.74    6.38
  -3   3  10    3.93   10.22
  -3  -3  10    0.78    1.84
   3   3 -10    0.83    2.32
  -3   3  10    4.95    9.10
  -3  -3   9    1.85    2.78
  -3  -3   9    3.52    3.29
  -3   3   9   -5.04   10.70
  -3  -3   9   -1.23    3.20
  -3  -3   9   -0.98    2.55
  -3   3   9    3.11    5.47
  -3  -3   9    1.62    6.43
  -3   3   9   -3.85    7.07
   3   3  -9    0.77    2.17
  -3  -3   8  336.26   33.81
  -3   3   8  252.61   31.69
  -3   3   8  258.42   41.84
  -3   3   8  178.18   40.57
   3   3  -8  281.21   30.51
  -3  -3   8  273.28   32.81
  -3  -3   8  292.26   30.11
   3   3  -7    3.08    2.20
  -3  -3   7    8.82    4.42
  -3   3   7   -4.30    7.90
  -3  -3   7   11.66    6.43
  -3   3   7    2.52    5.18
  -3  -3   7    8.63    7.48
  -3   3   7    6.12    6.51
   3   3  -6 2133.36  173.16
  -3  -3   6 2003.54  175.73
  -3   3   6 1629.01  186.51
  -3  -3   6 2421.22  184.88
  -3   3   6 1697.09  181.13
  -3  -3   5   21.16    7.32
  -3   3   5    7.97    5.69
  -3   3   5   10.41    5.56
  -3  -3   5   10.88    4.29
   3   3  -5   15.03    4.12
  -3  -3   4  657.96   63.38
  -3   3   4  578.48   63.52
  -3   3   4  647.35   62.81
  -3   3   4  718.44   63.00
  -3  -3   4  596.69   60.15
   3   3  -4  705.17   58.97
  -3  -3   3  542.63   52.79
  -3  -3   3  674.71   56.11
  -3   3   3  498.15   54.80
  -3   3   3  595.46   56.58
  -3  -3   2 5020.28  431.04
  -3  -3   2 5427.09  432.90
  -3   3   2 4900.94  432.94
  -3   3   2 4641.10  434.39
  -3   3   2 5021.14  433.08
  -3  -3   2 5956.82  435.86
  -3  -3   1  117.29   14.64
  -3   3   1  100.78   12.11
  -3   3   1  114.61   15.97
  -3  -3   1  136.42   18.13
  -3  -3   1  106.50   14.95
  -3   3   1  108.82   15.54
  -3   3   1  117.88   15.73
  -3  -3   1  125.72   17.22
  -3   3   0 1001.65   80.62
  -3  -3   0  759.50   79.88
  -3   3   0  816.57   73.96
  -3  -3   0 1093.75   82.04
  -3   3   0  899.12   75.26
  -3  -3  -1  675.46   57.09
  -3   3  -1  633.79   54.85
  -3   3  -1  486.23   48.88
  -3  -3  -1  686.86   57.02
  -3   3  -1  541.94   50.28
  -3  -3  -2  399.04   40.28
  -3   3  -2  366.06   37.62
  -3  -3  -2  319.09   35.81
  -3   3  -2  322.23   33.70
  -3   3  -2  337.59   33.66
  -3  -3  -3  130.36   21.18
  -3   3  -3  112.22   18.53
  -3   3  -3  145.40   17.83
  -3  -3  -3  104.30   17.23
  -3   3  -3  147.06   27.51
  -3  -3  -3  118.98   19.96
  -3   3  -3  108.73   15.48
  -3   3  -4    4.41    3.84
  -3  -3  -4    6.60    4.97
  -3  -3  -4    7.59    8.50
  -3   3  -4    2.22    5.27
  -3   3  -4    4.05    7.44
  -3  -3  -4    8.02    6.74
  -3   3  -4   -2.34    5.55
  -3   3  -5   31.78   14.52
  -3  -3  -5   17.33    7.76
  -3   3  -5   26.04    8.67
  -3  -3  -5   24.74   10.98
  -3   3  -5   19.90    9.65
  -3  -3  -5   16.78    7.00
  -3   3  -5   17.78    7.20
  -3  -3  -5   17.29    4.39
  -3   3  -5   12.28    4.32
  -3  -3  -5   29.26   12.52
  -3   3  -5   11.99    7.92
  -3   3  -5   22.42    8.10
  -3   3  -6  460.57   69.38
  -3  -3  -6  735.40   73.07
  -3   3  -6  483.93   64.99
  -3   3  -6  509.00   54.98
  -3  -3  -6  656.70   61.08
  -3  -3  -6  560.69   50.53
  -3   3  -6  545.96   58.66
  -3   3  -6  548.41   55.77
  -3  -3  -6  750.59   75.41
  -3   3  -6  573.09   68.51
  -3  -3  -6  501.07   59.16
  -3   3  -6  524.16   52.25
  -3   3  -6  572.91   51.76
  -3  -3  -6  519.19   50.34
  -3   3  -7  472.97   43.81
  -3  -3  -7  452.20   41.08
  -3   3  -7  309.56   54.85
  -3   3  -7  443.17   42.01
  -3   3  -7  312.20   41.66
  -3  -3  -7  410.64   48.04
  -3   3  -7  390.93   48.04
  -3  -3  -7  509.92   62.67
  -3   3  -7  356.48   56.30
  -3  -3  -7  491.23   46.28
  -3   3  -7  342.42   42.91
  -3   3  -7  392.09   40.71
  -3  -3  -7  643.70   66.82
  -3   3  -7  300.62   52.85
  -3  -3  -7  441.22   39.83
  -3   3  -8   -4.07    5.19
  -3   3  -8    2.60    2.76
  -3  -3  -8   -2.46    4.52
  -3  -3  -8   -0.99    3.31
  -3  -3  -8    4.30    7.90
  -3   3  -8   -4.71   11.17
  -3   3  -8    1.62    5.17
  -3  -3  -8   -1.48    5.45
  -3   3  -8    4.11    4.11
  -3   3  -8    3.31    3.70
  -3   3  -8   -2.29    3.64
  -3  -3  -8    0.84    2.19
  -3  -3  -9   15.25    8.19
  -3   3  -9   24.52   10.09
  -3  -3  -9   13.42   11.70
  -3   3  -9    5.10    9.46
  -3  -3  -9   12.78   12.84
  -3   3  -9   14.55   11.57
  -3   3  -9   13.77    6.49
  -3   3  -9   20.16    6.66
  -3  -3  -9   18.92    7.82
  -3   3  -9   13.26    7.56
  -3   3  -9   12.60    5.16
  -3  -3  -9   16.54    5.79
  -3  -3 -10  161.60   19.72
  -3   3 -10  191.18   24.91
  -3   3 -10  200.26   22.82
  -3  -3 -10  199.64   23.99
  -3   3 -10  145.61   22.54
  -3   3 -10  156.64   20.64
  -3   3 -11   35.63    9.47
  -3  -3 -11   33.53    8.49
  -3   3 -11   32.27    8.75
  -3  -3 -11   31.37    6.52
  -3   3 -12  156.43   21.61
  -3   3 -12  175.51   21.95
  -3   3 -13   13.40    4.32
  -3   3 -13   14.24    3.52
  -3  -3 -13    8.32    3.62
  -3   3 -13   13.09    4.45
   3  -3  14  110.51   10.70
  -3   3 -14   99.09   10.79
  -3  -4  15   39.93    7.57
  -3  -4  15   30.99    5.86
   3   4 -15   48.77    5.87
  -3   4  14   84.43   11.14
   3   4 -14   77.09   10.63
  -3  -4  14   73.94   10.30
  -3  -4  14   95.66   12.66
   3   4 -13   91.42   10.61
  -3   4  13   52.89   10.12
  -3  -4  13   82.14   12.93
  -3   4  13   70.01   11.80
   3   4 -13   69.27   11.10
   3   4 -12  156.28   17.35
  -3  -4  12  156.76   19.50
  -3   4  12  122.84   18.20
  -3  -4  12  187.69   21.69
  -3   4  12   90.81   17.60
   3   4 -12  184.70   20.29
  -3   4  11  198.76   24.87
  -3   4  11  151.29   33.25
  -3   4  11  177.51   22.91
  -3   4  11  163.62   30.43
  -3  -4  11  211.14   35.42
  -3  -4  11  186.72   24.29
  -3  -4  11  154.67   26.41
  -3  -4  11  215.21   21.03
  -3  -4  11  182.82   22.80
  -3  -4  11  183.05   21.60
   3   4 -11  169.04   20.44
  -3   4  10  510.70   57.03
   3   4 -10  558.92   53.49
  -3   4  10  597.94   78.18
  -3  -4  10  719.12   59.82
  -3  -4  10  733.29   75.54
  -3   4  10  655.88   70.66
  -3   4  10  573.34   56.88
  -3  -4  10  535.67   61.54
  -3  -4  10  577.38   53.08
  -3  -4  10  561.18   54.33
  -3  -4  10  542.22   55.82
  -3  -4  10  560.44   54.59
  -3   4   9  154.00   20.62
   3   4  -9  123.27   15.79
  -3  -4   9  111.80   20.28
  -3  -4   9  124.30   15.27
  -3   4   9  113.97   18.01
  -3  -4   9  180.59   31.16
  -3  -4   9  141.91   19.59
  -3   4   9  125.35   25.11
  -3  -4   9  129.58   16.80
  -3  -4   9  131.48   17.94
  -3  -4   9  138.54   17.23
  -3   4   9  136.04   33.19
  -3   4   8  255.94   32.34
  -3  -4   8  297.11   34.75
   3   4  -8  282.64   31.78
  -3  -4   8  312.04   31.54
  -3   4   8  254.09   47.30
  -3  -4   8  306.04   30.16
  -3  -4   8  281.56   28.01
  -3   4   8  237.18   30.59
  -3  -4   8  301.14   41.29
  -3   4   8  283.41   40.87
  -3  -4   8  301.46   31.79
   3   4  -7  193.89   22.78
  -3  -4   7  222.90   42.83
  -3   4   7  181.03   27.66
  -3  -4   7  204.54   25.25
  -3  -4   7  183.58   21.90
  -3  -4   7  226.51   30.58
  -3   4   7  162.60   28.38
  -3   4   7  164.08   21.83
   3   4  -6  676.34   63.33
  -3  -4   6  643.27   83.17
  -3   4   6  660.66   69.18
  -3  -4   6  656.53   65.23
  -3  -4   6  808.22   71.33
  -3   4   6  649.21   70.03
   3   4  -5   69.87   10.59
  -3   4   5   69.12   14.21
  -3  -4   5   73.77   12.17
  -3   4   5   59.81   11.90
  -3  -4   5   73.70   13.83
  -3   4   5   56.43   13.19
  -3   4   5  100.46   21.67
  -3  -4   4  859.81   71.61
  -3   4   4  662.56   70.48
  -3   4   4  656.72   70.41
  -3  -4   4  774.10   69.31
  -3   4   4  778.64   71.78
  -3  -4   3   46.95    8.90
  -3   4   3   30.31    7.83
  -3   4   3   37.72    8.23
  -3  -4   3   30.98    7.21
  -3   4   3   22.31    8.39
  -3  -4   2  176.46   19.08
  -3   4   2  133.60   18.28
  -3  -4   2  162.64   18.57
  -3   4   2  129.56   18.52
  -3  -4   2  126.97   19.95
  -3   4   1  113.35   15.66
  -3  -4   1   86.37   15.75
  -3  -4   1  132.71   16.99
  -3   4   1  101.47   11.45
  -3  -4   1  101.84   14.40
  -3   4   1   99.50   14.55
  -3  -4   1  113.43   16.57
  -3   4   0    1.78    1.68
  -3  -4   0    1.43    4.29
  -3   4   0    2.68    1.23
  -3   4   0    2.21    3.90
  -3  -4   0    2.66    5.09
  -3  -4  -1   42.44   11.23
  -3  -4  -1   51.56   10.54
  -3   4  -1   36.28    8.61
  -3   4  -1   32.96    5.89
  -3   4  -1   37.05    7.05
  -3  -4  -2 4107.85  326.78
  -3   4  -2 3543.81  322.93
  -3   4  -2 3815.07  320.98
  -3   4  -3  276.48   44.11
  -3   4  -3  269.56   33.04
  -3  -4  -3  268.48   35.11
  -3  -4  -3  255.30   32.47
  -3   4  -3  327.06   31.62
  -3   4  -4    4.98    7.51
  -3  -4  -4   15.26    9.76
  -3   4  -4    5.53    4.47
  -3  -4  -4   14.06    9.00
  -3   4  -4    6.01    6.06
  -3  -4  -4   16.23    5.79
  -3   4  -5  267.46   34.32
  -3  -4  -5  404.38   44.51
  -3   4  -5  241.55   36.60
  -3  -4  -5  272.84   38.72
  -3   4  -5  181.65   44.06
  -3  -4  -5  293.45   29.24
  -3   4  -5  288.40   29.40
  -3  -4  -5  262.16   28.32
  -3  -4  -5  339.22   37.02
  -3  -4  -5  304.71   28.94
  -3   4  -5  311.47   36.17
  -3   4  -6 1170.39  100.37
  -3   4  -6  664.53  117.44
  -3  -4  -6  982.73  109.37
  -3   4  -6 1079.33  102.11
  -3   4  -6  956.62  104.24
  -3  -4  -6 1151.50   98.41
  -3   4  -6 1123.83  106.07
  -3  -4  -6 1193.79  108.57
  -3   4  -6 1228.26  109.20
  -3  -4  -6 1348.66  118.99
  -3   4  -6  964.42  112.30
  -3  -4  -6 1449.78  119.43
  -3   4  -6 1019.89  111.83
  -3   4  -6 1031.29  100.14
  -3  -4  -6 1357.38  102.82
  -3  -4  -6 1151.99   98.52
  -3   4  -7  198.19   23.04
  -3   4  -7  160.19   32.16
  -3  -4  -7  240.95   37.08
  -3   4  -7  182.78   23.26
  -3  -4  -7  206.60   24.16
  -3   4  -7  194.21   24.95
  -3   4  -7   87.29   30.11
  -3  -4  -7  127.24   26.69
  -3   4  -7  169.99   25.90
  -3  -4  -7  207.89   29.59
  -3   4  -7  205.89   29.72
  -3  -4  -7  249.59   37.82
  -3   4  -7  214.88   36.55
  -3  -4  -7  225.20   22.68
  -3  -4  -7  281.64   26.71
  -3   4  -7  146.85   22.57
  -3  -4  -7  219.56   21.75
  -3  -4  -8  249.48   27.29
  -3   4  -8  213.53   26.46
  -3   4  -8  226.93   27.94
  -3   4  -8  179.41   26.08
  -3  -4  -8  314.58   29.42
  -3   4  -8  191.14   27.90
  -3   4  -8  211.77   32.76
  -3  -4  -8  188.77   30.96
  -3  -4  -8  280.21   42.53
  -3   4  -8  191.38   38.47
  -3  -4  -8  283.55   26.19
  -3   4  -8  197.80   37.49
  -3  -4  -8  329.55   43.62
  -3   4  -8  210.17   25.62
  -3  -4  -8  232.79   24.37
  -3   4  -9  150.75   22.26
  -3   4  -9  178.43   29.24
  -3  -4  -9  122.25   24.85
  -3   4  -9  215.94   23.47
  -3   4  -9  166.73   22.94
  -3  -4  -9  169.67   21.41
  -3  -4  -9  210.68   35.65
  -3   4  -9  166.01   33.86
  -3  -4  -9  207.39   23.25
  -3   4  -9  188.88   23.64
  -3  -4  -9  185.50   20.53
  -3   4 -10   23.46    6.90
  -3   4 -10   10.67    6.06
  -3  -4 -10   30.32    8.07
  -3   4 -10   15.90    7.61
  -3   4 -10   23.26    6.64
  -3   4 -10   25.10    6.81
  -3  -4 -10   16.46    4.98
  -3   4 -11   22.66    6.47
  -3  -4 -11   11.14    5.43
  -3   4 -11   11.14    6.14
  -3   4 -12   27.89    5.37
  -3   4 -12   17.34    5.46
  -3  -4 -12   18.46    5.22
  -3   4 -12   19.65    6.32
  -3   4 -13   91.17   11.48
  -3  -4 -13   85.35   10.08
  -3   4 -13   95.69   10.48
  -3   4 -14    2.35    1.31
   3   5 -15    2.00    1.62
   3  -5 -15    0.71    1.60
  -3  -5  14    5.15    2.98
   3   5 -14    0.83    1.59
   3   5 -14    2.57    2.74
  -3  -5  14    3.81    2.53
  -3  -5  14    4.47    2.86
  -3  -5  13    2.97    3.16
  -3   5  13    1.67    2.35
  -3  -5  13    0.99    3.49
   3   5 -13    7.39    4.39
   3   5 -13    4.01    2.57
  -3   5  12  235.73   28.42
  -3   5  12  225.59   28.27
  -3  -5  12  296.56   29.88
   3   5 -12  295.03   29.83
   3   5 -12  270.93   27.38
  -3  -5  11   82.87   12.27
  -3  -5  11   83.27   13.61
  -3  -5  11   79.63   12.12
   3   5 -11   69.43   11.42
  -3  -5  11   90.36   14.19
  -3   5  11   72.62   12.33
  -3  -5  11   76.80   11.13
  -3   5  11  105.35   15.00
  -3  -5  10    0.83    2.15
  -3  -5  10    1.03    2.88
  -3  -5  10    7.07    5.59
  -3  -5  10    2.15    2.79
   3   5 -10    1.93    3.07
  -3  -5  10   -1.34    3.18
  -3   5  10    2.29    4.03
  -3   5  10    8.47    5.99
  -3  -5  10    1.26    4.81
  -3  -5  10    3.14    4.72
  -3   5  10   -1.45    4.06
  -3   5  10   -4.94    9.08
  -3  -5   9   72.93   11.50
   3   5  -9   62.97   10.53
  -3  -5   9   78.80   12.74
  -3  -5   9   62.51    9.68
  -3  -5   9   61.42   14.08
  -3   5   9   58.13   11.20
  -3   5   9   44.64   15.79
  -3  -5   9   61.47   17.33
  -3  -5   9   70.70   12.27
  -3   5   9   67.27   23.29
   3   5  -9   59.64   12.26
  -3   5   9  106.46   15.13
  -3  -5   8  793.89   67.06
  -3   5   8  657.64   66.32
  -3   5   8  799.13   76.89
  -3  -5   8  710.76   70.36
  -3  -5   8  729.02   64.48
   3   5  -8  678.72   67.12
  -3  -5   8  743.77   95.40
  -3  -5   8  737.29   62.81
  -3  -5   8  743.47   65.12
  -3  -5   8  824.51   77.07
  -3   5   8  603.20   72.42
  -3   5   8  514.07   63.00
  -3   5   7  191.49   27.57
  -3  -5   7  322.41   37.18
  -3   5   7  338.26   38.74
  -3  -5   7  268.07   28.74
  -3  -5   7  300.66   29.13
  -3  -5   7  380.26   57.49
  -3   5   7  321.86   39.14
  -3  -5   7  292.44   33.78
   3   5  -7  327.15   32.64
  -3  -5   6  587.04   55.65
  -3   5   6  513.27   55.27
  -3  -5   6  550.07   48.60
  -3   5   6  634.73   71.05
  -3  -5   6  435.48   69.11
   3   5  -6  600.45   52.01
  -3   5   6  591.29   59.17
  -3  -5   6  468.40   52.10
  -3   5   6  418.82   47.88
  -3   5   5  576.90   65.35
  -3  -5   5  808.31   67.32
  -3   5   5  654.77   65.76
  -3   5   5  680.54   69.58
  -3  -5   5  658.48   64.81
   3   5  -5  655.72   63.37
  -3   5   5  859.05   82.00
  -3  -5   4    9.85    4.34
  -3   5   4    1.38    2.94
  -3   5   4    5.36    4.64
  -3  -5   4    1.27    2.34
  -3   5   4   -1.67    4.70
  -3  -5   3  328.69   30.07
  -3   5   3  240.55   28.98
  -3  -5   3  315.66   30.59
  -3   5   3  197.49   28.90
  -3  -5   2 2504.41  188.40
  -3   5   2 2166.76  188.09
  -3   5   2 1979.53  184.09
  -3  -5   2 2427.87  189.66
  -3   5   2 2108.57  187.27
  -3   5   1  845.16   78.60
  -3  -5   1  873.66   80.38
  -3  -5   1  877.95   79.75
  -3   5   1  809.06   75.82
  -3  -5   1 1002.10   82.71
  -3   5   0   27.72    6.19
  -3  -5   0   49.42   11.50
  -3  -5   0   28.12    8.28
  -3   5   0   25.25    7.14
  -3   5   0   37.52    8.48
  -3  -5   0   25.31    8.13
  -3  -5  -1  134.23   21.78
  -3   5  -1   97.59   14.12
  -3   5  -1  107.45   15.72
  -3  -5  -1  100.58   16.64
  -3  -5  -2  230.13   31.62
  -3   5  -2  188.16   22.64
  -3  -5  -2  169.93   24.30
  -3   5  -2  188.85   23.35
  -3   5  -3  318.63   32.32
  -3  -5  -3  298.48   35.06
  -3   5  -3  229.01   31.25
  -3   5  -4  199.55   27.21
  -3   5  -4  227.64   30.06
  -3  -5  -4  282.32   33.54
  -3  -5  -4  245.18   24.24
  -3  -5  -4  154.63   31.64
  -3   5  -4  260.19   46.77
  -3  -5  -5   34.84    6.81
  -3  -5  -5   60.48   13.08
  -3  -5  -5   27.43   11.28
  -3   5  -5   26.71   10.15
  -3   5  -5   43.31   10.53
  -3   5  -5   19.52   14.10
  -3  -5  -5   32.86   14.24
  -3  -5  -5   37.50    7.00
  -3   5  -5   44.78    9.35
  -3  -5  -5   27.40    6.34
  -3   5  -6  515.77   61.56
  -3  -5  -6  593.09   53.68
  -3   5  -6  566.81   63.28
  -3  -5  -6  566.39   62.55
  -3   5  -6  614.02   66.14
  -3  -5  -6  710.14   69.38
  -3   5  -6  628.55   56.18
  -3  -5  -6  646.51   57.16
  -3  -5  -6  508.84   66.90
  -3   5  -6  374.38   74.30
  -3   5  -6  534.85   57.77
  -3   5  -6  512.38   54.13
  -3  -5  -6  653.36   54.18
  -3   5  -7  119.51   17.66
  -3   5  -7  125.21   21.47
  -3   5  -7  135.83   23.64
  -3  -5  -7  109.43   21.07
  -3  -5  -7  124.33   14.73
  -3  -5  -7  100.69   23.38
  -3   5  -7  111.40   23.88
  -3   5  -7  125.94   16.98
  -3  -5  -7  127.15   17.31
  -3   5  -7   81.28   28.62
  -3  -5  -7   78.63   21.53
  -3   5  -7  109.03   18.30
  -3   5  -7  108.29   15.83
  -3  -5  -7  157.80   17.74
  -3  -5  -7  113.63   14.57
  -3   5  -8   26.95    7.65
  -3   5  -8   22.04    7.37
  -3   5  -8    6.08   19.39
  -3  -5  -8   31.44   11.41
  -3   5  -8   17.14    9.33
  -3  -5  -8   30.75   10.24
  -3   5  -8   11.25    7.40
  -3  -5  -8    6.28   23.58
  -3   5  -8  -13.52   22.71
  -3   5  -8   19.98    6.22
  -3   5  -8    1.17    8.23
  -3  -5  -8    6.51    7.98
  -3  -5  -8   22.59    6.89
  -3  -5  -8   16.10    4.53
  -3   5  -9   13.46    6.38
  -3   5  -9   12.47    5.42
  -3   5  -9   16.80    8.43
  -3  -5  -9   10.09    6.02
  -3   5  -9    6.39    6.14
   3  -5   9    7.31    3.69
  -3   5  -9   13.69   12.06
  -3   5  -9    1.17    3.99
  -3  -5  -9    6.24    4.18
  -3   5  -9   10.22    5.95
  -3  -5  -9   11.80    5.50
  -3  -5 -10  362.79   30.35
  -3   5 -10  215.83   28.21
  -3   5 -10  278.52   29.92
  -3   5 -10  310.56   33.86
  -3   5 -10  297.11   31.71
  -3   5 -10  216.51   29.31
  -3   5 -11    9.79    4.53
  -3   5 -11   13.98    4.27
  -3   5 -11    4.66    4.03
  -3   5 -11   11.42    5.76
  -3  -5 -11    7.32    3.95
  -3   5 -12  574.78   59.31
  -3   5 -12  626.24   58.34
  -3  -5 -12  679.81   57.99
   3  -5  12  789.88   61.68
  -3   5 -13  114.74   12.05
   3  -5  13  118.70   12.37
   3   6 -15  165.36   15.58
   3  -6 -15  165.52   15.47
  -3  -6  14   21.44    4.92
   3   6 -14   23.48    4.09
  -3  -6  14   19.06    4.56
   3   6 -14   22.78    4.90
   3   6 -13  275.44   29.66
  -3  -6  13  345.40   32.28
   3   6 -13  333.13   31.78
  -3  -6  12  843.04   80.73
   3   6 -12  947.95   81.67
  -3  -6  12  882.27   79.81
   3   6 -12  883.00   79.19
  -3  -6  11   86.94   13.47
   3   6 -11   79.71   12.36
  -3  -6  11  107.13   12.82
  -3  -6  11   83.60   12.45
  -3  -6  11   99.48   14.69
  -3  -6  10   40.38   11.92
  -3  -6  10   50.68    9.99
  -3   6  10   22.19    7.26
  -3  -6  10   30.18    7.45
   3   6 -10   33.52    7.58
  -3  -6  10   42.52    9.56
  -3  -6  10   46.60    7.72
  -3  -6  10   34.23    7.76
  -3  -6   9  261.42   36.59
  -3   6   9  276.08   31.97
  -3  -6   9  347.68   33.05
   3   6  -9  253.19   33.94
  -3  -6   9  321.21   34.06
   3   6  -9  285.37   30.00
  -3  -6   9  321.37   30.44
  -3  -6   9  296.12   31.67
  -3  -6   8   -1.35    3.20
  -3   6   8   14.75   10.43
  -3   6   8    2.91    5.36
  -3  -6   8    2.10    3.15
   3   6  -8    1.68    2.53
  -3   6   8    2.18    3.27
   3   6  -8    1.71    2.72
  -3  -6   8    1.60    2.25
  -3   6   8    1.03    2.90
  -3  -6   8   -1.02    3.26
  -3  -6   7  117.22   14.10
  -3   6   7   87.50   20.00
  -3  -6   7  131.24   20.09
  -3  -6   7  120.05   19.27
  -3   6   7   82.58   17.18
  -3   6   7  130.09   29.80
  -3  -6   7  108.28   31.34
  -3  -6   7  121.92   15.39
  -3  -6   7  110.92   16.41
   3   6  -7  113.74   17.55
  -3   6   6  276.48   34.21
  -3  -6   6  296.60   34.33
  -3  -6   6  222.23   31.63
  -3  -6   6  293.57   34.70
  -3   6   6  271.64   38.79
  -3   6   6  346.14   48.46
  -3  -6   6  299.68   51.69
  -3   6   6  310.24   30.72
   3   6  -6  379.12   35.19
  -3   6   5  102.32   16.65
  -3  -6   5  130.09   17.48
  -3   6   5  158.78   16.67
  -3  -6   5   73.76   15.76
  -3   6   5  115.10   24.97
  -3   6   5  104.49   20.42
  -3  -6   5  119.04   17.95
  -3   6   5  114.36   18.20
  -3   6   5  108.98   14.71
   3   6  -5   98.82   15.87
  -3   6   4  110.59   21.13
  -3  -6   4  132.70   19.57
  -3   6   4  155.81   23.23
  -3  -6   4  187.09   20.32
  -3   6   4  133.72   19.11
  -3  -6   3  152.70   19.32
  -3   6   3  146.09   19.70
  -3  -6   3  184.50   22.45
  -3   6   3  160.61   22.90
  -3  -6   2  287.53   30.90
  -3  -6   2  260.12   29.06
  -3   6   2  206.93   27.16
  -3  -6   1   49.46   12.94
  -3  -6   1   67.27   11.89
  -3   6   1   48.86    9.10
  -3  -6   0   12.93    8.00
  -3   6   0   12.26    4.97
  -3  -6   0   12.38    5.52
  -3   6   0   15.22    5.01
  -3  -6  -1   10.45   10.38
  -3   6  -1    3.35    3.76
  -3  -6  -1    5.39    4.96
  -3   6  -1    1.06    3.00
  -3  -6  -1    5.17    4.35
  -3   6  -1    3.72    3.23
  -3  -6  -2  925.77   92.83
  -3  -6  -2  837.47   81.94
  -3   6  -2  824.07   80.07
  -3   6  -2  934.86   81.89
  -3   6  -2  858.07   81.25
  -3   6  -3   46.28   10.60
  -3   6  -3   49.27    7.86
  -3   6  -3   40.87    9.99
  -3  -6  -3   47.64   11.64
  -3  -6  -3   34.69   14.77
  -3  -6  -3   45.25    8.33
  -3   6  -3   48.11   12.16
  -3  -6  -4  371.55   36.82
  -3  -6  -4  470.08   46.15
  -3   6  -4  300.73   40.06
  -3   6  -4  384.78   36.26
  -3   6  -4  355.85   42.06
  -3   6  -4  383.19   38.50
  -3   6  -4  418.61   45.87
  -3  -6  -4  370.14   35.38
  -3   6  -5   38.68    9.91
  -3  -6  -5   45.71   17.02
  -3   6  -5   48.02   22.11
  -3   6  -5   56.46    9.95
  -3  -6  -5   35.58    7.07
  -3  -6  -5   42.43    7.84
  -3   6  -5   31.43   10.58
  -3  -6  -5   48.70   13.11
  -3   6  -5   45.65    7.95
  -3   6  -5   56.81   12.48
  -3  -6  -5   37.96    8.89
  -3   6  -5   37.10    9.69
  -3  -6  -6    8.69    3.71
  -3  -6  -6    7.36    3.53
  -3   6  -6    4.58    6.91
  -3   6  -6   11.21    5.86
  -3   6  -6    7.18    3.74
  -3   6  -6   10.78    5.28
  -3   6  -6    7.53    6.22
  -3   6  -6    7.35   13.52
  -3  -6  -6    3.72    7.92
  -3  -6  -6    9.66    5.17
  -3   6  -6    4.92    4.65
  -3   6  -7  416.18   46.79
  -3   6  -7  419.03   71.63
  -3   6  -7  432.32   50.99
  -3   6  -7  368.85   50.68
  -3  -6  -7  462.18   58.24
  -3   6  -7  501.27   43.40
  -3   6  -7  376.42   50.62
  -3  -6  -7  470.37   44.87
  -3   6  -7  369.58   41.73
  -3   6  -7  480.56   44.94
  -3  -6  -7  467.35   41.77
  -3   6  -8 1461.36  117.67
  -3   6  -8 1301.23  119.47
  -3  -6  -8 1364.02  116.82
  -3   6  -8 1235.96  121.80
  -3  -6  -8 1299.70  113.37
   3   6   8 1172.94  121.23
  -3   6  -8 1497.06  116.14
  -3  -6  -8 1313.09  129.76
  -3   6  -8 1402.81  119.05
  -3   6  -8 1104.99  114.10
  -3   6  -9  239.17   29.87
  -3  -6  -9  223.19   26.31
  -3   6  -9  314.32   28.38
  -3   6  -9  258.74   29.74
  -3   6  -9  294.01   29.28
   3  -6   9  244.07   27.40
  -3   6  -9  225.55   30.90
  -3  -6  -9  268.11   28.30
  -3   6 -10  117.81   17.08
  -3  -6 -10  105.89   13.51
  -3   6 -10  107.80   15.87
  -3   6 -10  130.90   17.65
   3  -6  10  104.60   13.89
  -3   6 -10  125.07   18.31
  -3   6 -10  107.70   14.24
  -3   6 -11  643.09   62.48
  -3   6 -11  621.33   60.99
  -3   6 -11  748.94   64.73
   3  -6  11  833.99   66.48
  -3   6 -11  671.51   63.22
  -3   6 -12   99.53   11.28
  -3   6 -12  111.96   13.04
  -3   6 -12   74.14   11.50
   3  -6  12  110.26   13.21
   3  -6  12   93.10   11.22
  -3   6 -13   10.32    3.08
   3  -6  13   10.77    2.53
   3   7 -14   11.15    3.15
  -3  -7  14    7.13    2.77
  -3  -7  14   11.34    3.16
   3   7 -14    6.67    1.99
  -3  -7  14   -0.38    1.58
   3  -7 -14    7.64    2.49
  -3  -7  13    8.76    3.74
   3   7 -13    5.39    3.30
   3   7 -13   10.74    4.04
  -3  -7  12  126.83   14.82
   3   7 -12  141.46   15.96
  -3  -7  12  110.20   16.00
   3   7 -12  131.26   16.86
  -3  -7  11  718.43   71.21
  -3  -7  11  834.05   69.27
   3   7 -11  731.17   69.66
  -3  -7  10   83.43   13.59
   3   7 -10   70.88   11.68
  -3  -7  10   75.96   11.40
  -3  -7  10   70.71   10.84
   3   7 -10   72.28   10.71
  -3   7   9   54.45   18.92
  -3  -7   9   41.70   11.45
  -3  -7   9   41.36    9.74
   3   7  -9   33.31    7.22
  -3  -7   9   39.46    7.72
   3   7  -8  794.57   80.25
  -3  -7   8  809.17   82.28
  -3   7   8  778.01   86.39
  -3   7   8 1116.39  104.33
  -3  -7   8  844.29   78.10
   3   7  -8  848.20   74.91
  -3  -7   8  784.98   73.92
  -3   7   7  153.01   21.37
  -3  -7   7  207.04   27.63
  -3   7   7  167.45   29.00
   3   7  -7  201.97   25.85
  -3  -7   7  176.18   23.07
  -3   7   7  253.34   40.64
  -3  -7   7  207.67   20.99
  -3  -7   7  158.32   23.24
  -3   7   6    1.25    6.51
  -3   7   6    2.85    5.24
  -3  -7   6    9.48    4.93
   3   7  -6    6.83    4.80
  -3  -7   6   -1.32    2.81
  -3   7   6    1.03    2.46
  -3  -7   6    6.90    5.80
  -3   7   6   16.34   12.26
  -3  -7   6    7.01    3.10
   3   7  -5    1.61    2.43
  -3   7   5    0.97    2.32
  -3  -7   5    7.31    3.20
  -3  -7   5    1.83    5.13
  -3   7   5    5.81    3.42
  -3   7   5    5.35    5.68
  -3   7   5   -1.78    4.62
  -3  -7   5    3.53    3.75
  -3   7   4  477.49   40.76
  -3  -7   4  375.64   44.83
  -3   7   4  432.48   40.15
  -3  -7   4  446.78   45.10
  -3   7   4  297.15   45.49
  -3   7   4  346.88   46.08
  -3  -7   3  391.93   39.71
  -3  -7   3  359.53   37.92
  -3  -7   3  367.63   32.43
  -3  -7   2   35.34    9.27
  -3   7   2   14.73    6.15
  -3  -7   2   25.39    7.58
  -3  -7   2   18.71    4.74
  -3  -7   1   77.06   15.82
  -3   7   1   51.84   10.66
  -3  -7   1   64.47   11.24
  -3  -7   0  294.81   43.46
  -3   7   0  327.16   38.46
  -3  -7   0  436.05   38.26
  -3  -7  -1  152.69   29.61
  -3   7  -1  159.84   23.96
  -3   7  -1  205.01   23.60
  -3  -7  -1  233.04   23.65
  -3  -7  -2  169.91   33.04
  -3   7  -2  218.11   25.78
  -3  -7  -2  237.34   23.74
  -3   7  -2  187.11   20.84
  -3   7  -2  151.27   24.18
  -3   7  -3 1298.07  106.63
  -3   7  -3 1100.12  112.05
  -3   7  -3 1078.48  106.60
  -3  -7  -3 1211.56  107.88
  -3  -7  -3 1199.68  107.28
  -3  -7  -3 1179.13  125.35
  -3  -7  -3 1165.27  105.05
  -3   7  -3 1576.90  115.65
  -3  -7  -4  590.21   55.87
  -3   7  -4  600.73   55.49
  -3   7  -4  540.54   61.66
  -3   7  -4  500.69   58.89
  -3  -7  -4  566.10   56.87
  -3   7  -4  724.45   87.52
  -3   7  -4  660.36   58.98
  -3   7  -4  822.14   67.19
  -3   7  -5  141.24   22.65
  -3  -7  -5   70.67   11.49
  -3   7  -5   93.35   12.56
  -3   7  -5   74.89   16.21
  -3   7  -5   80.48   15.43
  -3  -7  -5   84.25   13.76
  -3  -7  -5   91.03   24.64
  -3   7  -5   67.78   13.92
  -3   7  -5  103.68   15.11
  -3  -7  -5   84.10   11.88
  -3   7  -6  304.45   31.96
  -3   7  -6  304.71   39.97
  -3   7  -6  316.01   36.40
  -3  -7  -6  363.26   35.03
  -3   7  -6  267.12   58.52
  -3  -7  -6  285.13   47.13
  -3  -7  -6  311.37   31.44
  -3  -7  -6  329.06   31.34
  -3   7  -6  263.20   34.97
  -3   7  -7  434.24   39.45
  -3   7  -7  336.97   39.81
  -3   7  -7  391.13   65.58
  -3  -7  -7  346.20   37.35
  -3  -7  -7  343.48   34.46
  -3   7  -7  356.11   36.31
  -3  -7  -7  351.90   50.59
  -3   7  -8   23.14    8.33
  -3   7  -8   12.26    5.43
  -3  -7  -8   24.17    6.97
  -3   7  -8   20.51   10.55
  -3   7  -8   19.52    5.40
  -3   7  -9   13.36    7.56
  -3   7  -9    9.21    5.82
  -3   7  -9   10.92    4.40
  -3   7  -9   13.12    6.43
  -3   7  -9    6.56    4.26
  -3  -7  -9    8.51    4.57
   3  -7   9   10.57    4.40
  -3   7  -9   13.62    6.19
  -3   7 -10   -1.09    4.16
  -3   7 -10    2.37    4.71
   3  -7  10    0.78    2.34
  -3   7 -10    3.94    2.90
  -3   7 -10    1.11    3.34
   3  -7  10    1.49    2.38
  -3   7 -10   -1.24    4.91
  -3   7 -11   13.92    4.82
  -3   7 -11   15.99    4.24
   3  -7  11    9.32    3.18
   3  -7  11   23.01    6.58
  -3   7 -11   12.33    4.26
   3  -7  11   15.71    4.07
  -3   7 -11   22.57    5.80
  -3   7 -12  471.52   39.53
  -3   7 -12  443.69   38.19
   3  -7  12  475.05   38.58
   3   8 -14   78.14    8.34
  -3  -8  14   65.77    8.08
   3  -8 -14   71.65    7.52
   3   8 -13   89.76    8.80
  -3  -8  13   87.56    9.41
   3  -8 -13   86.88    8.35
   3  -8 -12  375.28   34.94
   3   8 -12  368.18   35.32
  -3  -8  12  341.70   35.93
  -3  -8  12  375.91   34.57
   3   8 -11   48.34    9.12
  -3  -8  11   70.47    9.43
   3   8 -11   54.05    8.32
  -3  -8  11   51.73    9.99
   3   8 -10  244.22   23.69
  -3  -8  10  177.99   23.34
  -3  -8  10  188.33   21.59
  -3  -8  10  194.11   21.30
   3   8 -10  173.46   20.79
   3   8  -9    2.19    3.50
   3   8  -9    2.83    3.62
  -3  -8   9    2.68    2.85
  -3  -8   9    5.64    4.49
  -3   8   8   88.00   19.02
  -3  -8   8   81.96   17.10
   3   8  -8   70.70   15.39
  -3   8   8   64.76   12.98
  -3  -8   8  102.19   15.81
   3   8  -8  127.16   14.98
  -3  -8   8   91.18   12.61
  -3  -8   7 1460.93  124.24
  -3   8   7 1356.77  127.96
   3   8  -7 1472.22  123.05
  -3  -8   7 1394.83  118.70
  -3  -8   7 1197.94  118.35
  -3   8   7 1079.74  114.99
  -3  -8   7 1377.03  114.60
  -3   8   6    8.65    7.04
  -3  -8   6   14.50    6.80
   3   8  -6   35.10    9.63
  -3  -8   6   24.01    7.22
  -3   8   6   30.07    7.13
  -3   8   6   10.80    7.21
  -3  -8   6   33.50   10.39
  -3  -8   6   20.03    5.25
   3   8  -5   26.29    8.43
  -3  -8   5   37.24    6.84
  -3   8   5   24.87    9.91
  -3   8   5   20.54    6.63
  -3  -8   5   15.05    4.82
  -3  -8   5   29.29   10.53
  -3  -8   4    0.79    2.05
  -3   8   4   -2.52    5.34
  -3   8   4    6.84    6.40
  -3   8   4    3.88    3.25
  -3  -8   4    1.60    2.55
  -3  -8   4   -1.92    5.75
  -3   8   3  880.57   67.48
  -3   8   3  756.19   65.69
  -3  -8   3  853.37   65.91
  -3   8   3  607.34   65.01
  -3  -8   3  843.92   73.62
  -3  -8   2   -0.76    3.22
  -3  -8   2    3.88    6.52
  -3  -8   2    1.66    4.98
  -3   8   2   -0.79    2.79
  -3  -8   1 1412.69  114.26
  -3   8   1 1189.48  110.08
  -3  -8   1 1388.59  110.83
  -3  -8   1 1286.00  111.56
  -3  -8   1 1262.27  109.67
  -3   8   1 1020.10  113.86
  -3  -8   1 1359.44  122.16
  -3   8   0  107.85   14.50
  -3   8   0  104.58   17.37
  -3  -8   0  108.74   22.41
  -3  -8   0   99.30   13.90
  -3   8   0   85.03   16.26
  -3   8   0   91.59   12.51
  -3  -8   0  133.86   16.26
  -3   8   0   91.78   13.56
  -3   8  -1  102.84   13.84
  -3  -8  -1  103.36   13.60
  -3   8  -1   75.22   12.05
  -3   8  -1   77.62   14.32
  -3   8  -1   44.40   11.96
  -3   8  -1   74.08   10.72
  -3  -8  -1  111.44   24.09
  -3   8  -1   64.74   13.97
  -3   8  -1   88.70   16.01
  -3   8  -2    9.38    6.21
  -3   8  -2    9.13    5.82
  -3   8  -2   -1.56    4.40
  -3  -8  -2    3.83   11.50
  -3   8  -2    2.74    4.37
  -3  -8  -2    8.71    4.49
  -3  -8  -2    6.33    3.61
  -3   8  -2    3.10    3.12
  -3   8  -2    6.03    5.23
  -3   8  -2    3.52    2.83
  -3  -8  -3  351.39   34.06
  -3  -8  -3  327.95   34.12
  -3   8  -3  309.11   34.16
  -3   8  -3  249.06   36.21
  -3  -8  -3  389.92   53.31
  -3  -8  -3  343.63   35.08
  -3  -8  -3  310.67   31.79
  -3   8  -3  359.65   33.95
  -3   8  -3  283.39   38.99
  -3   8  -4  493.17   46.16
  -3  -8  -4  366.64   36.77
  -3   8  -4  328.35   40.65
  -3   8  -4  400.41   40.69
  -3   8  -4  438.47   63.69
  -3  -8  -4  402.27   56.07
   3  -8   4  350.82   34.76
  -3  -8  -4  345.78   37.93
  -3  -8  -4  348.07   36.48
  -3   8  -4  379.68   36.82
  -3   8  -4  325.51   43.27
  -3   8  -5  317.93   53.30
  -3   8  -5  295.66   33.71
  -3  -8  -5  186.02   22.53
  -3   8  -5  168.64   26.35
  -3   8  -5  188.54   25.38
  -3  -8  -5  211.42   24.97
   3  -8   5  208.35   22.12
  -3  -8  -5  207.59   22.52
  -3   8  -5  229.92   23.92
  -3   8  -5  190.86   29.78
  -3   8  -6   87.31   18.77
  -3  -8  -6   76.75   11.41
  -3  -8  -6  114.80   26.79
  -3   8  -6   91.30   13.19
  -3   8  -6   82.55   17.81
  -3   8  -6   76.68   15.13
  -3   8  -6   78.64   14.22
  -3  -8  -6   88.44   11.53
   3  -8   6   74.23   11.21
  -3  -8  -6   96.37   14.22
   3   8   7  350.92   52.79
  -3   8  -7  412.80   39.39
  -3  -8  -7  397.22   53.67
  -3   8  -7  324.25   39.68
  -3  -8  -7  398.57   40.07
  -3   8  -7  418.82   42.73
  -3   8  -7  396.96   42.98
   3  -8   7  414.59   38.35
  -3  -8  -8  487.14   45.76
  -3   8  -8  486.08   47.92
  -3   8  -8  383.13   45.31
   3  -8   8  484.04   44.36
  -3   8  -8  491.67   47.40
  -3   8  -8  476.78   45.13
  -3   8  -9    3.03    5.81
   3  -8   9   13.13    6.93
  -3   8  -9    3.29    4.37
   3  -8   9    5.31    3.14
  -3   8  -9    3.41    3.84
  -3   8  -9    5.08    3.13
  -3  -8  -9    4.07    3.08
  -3   8  -9    2.04    3.27
  -3   8  -9    4.98    6.06
  -3  -8  -9    5.91    3.71
   3  -8   9    7.42    3.83
  -3   8 -10  214.36   23.68
   3  -8  10  199.61   21.10
   3  -8  10  256.10   25.80
  -3   8 -10  189.36   21.22
   3  -8  10  195.40   21.44
   3  -8  11  360.46   26.94
  -3   8 -11  336.84   28.69
   3  -8  12   99.91   11.11
   3  -8  12   93.14    9.74
   3   9 -13   28.27    4.46
   3  -9 -13   23.69    3.91
   3   9 -13   29.53    4.93
   3   9 -12    3.17    2.52
   3   9 -12    0.70    2.95
  -3  -9  12   -0.44    1.63
   3  -9 -12   -0.49    2.13
   3  -9 -11  590.09   48.56
  -3  -9  11  535.93   49.99
  -3  -9  11  552.18   48.28
   3   9 -11  504.59   47.62
   3   9 -11  593.09   49.80
  -3  -9  11  396.45   46.97
   3   9 -11  637.69   51.02
   3   9 -10   18.30    5.02
  -3  -9  10   20.52    5.25
  -3  -9  10   20.73    6.18
   3   9 -10   18.39    5.56
  -3  -9  10   16.41    4.60
   3  -9 -10   15.69    4.95
   3   9 -10   24.93    6.87
   3  -9  -9   21.61    5.92
  -3  -9   9   24.79    7.01
   3   9  -9   21.56    5.89
  -3  -9   9   17.51    5.22
   3   9  -9   23.51    6.65
   3  -9  -8   44.38    8.59
   3   9  -8   58.08   10.11
  -3  -9   8   43.74    8.53
  -3  -9   8   53.24   10.85
  -3  -9   7   11.49    5.35
  -3  -9   7    9.85    4.13
  -3   9   7   13.54    7.10
   3   9  -7    8.65    5.69
   3  -9  -7   12.89    4.65
  -3   9   7   12.77    6.58
  -3  -9   7   14.74    7.01
  -3  -9   7    8.59    4.03
  -3   9   6  398.77   38.04
  -3  -9   6  294.44   38.15
   3   9  -6  418.62   44.96
  -3  -9   6  422.56   37.04
  -3  -9   6  413.32   43.58
  -3   9   6  344.13   45.81
  -3   9   6  345.14   39.53
  -3  -9   6  339.67   36.36
   3   9  -5  515.32   55.69
  -3   9   5  419.01   56.17
  -3  -9   5  530.32   48.26
  -3  -9   5  524.95   55.19
  -3  -9   5  453.57   47.89
  -3   9   5  611.44   50.88
  -3   9   4   99.82   20.98
  -3   9   4  115.40   22.10
  -3   9   4  161.93   18.13
  -3  -9   4  146.56   22.34
  -3  -9   4  137.81   16.60
  -3  -9   4  136.33   16.79
  -3  -9   3 1580.71  141.11
  -3   9   3 1548.45  141.60
  -3  -9   3 1897.24  150.35
  -3   9   3 1696.51  142.72
  -3  -9   2  242.52   26.93
  -3   9   2  220.51   23.86
  -3   9   2  229.73   23.74
  -3  -9   2  204.24   22.83
  -3   9   2  181.41   25.35
  -3  -9   1  122.37   16.46
  -3  -9   1  107.62   20.61
  -3   9   1   85.26   13.04
  -3   9   1   63.66   14.28
  -3   9   0  142.67   20.88
  -3   9   0  100.39   18.15
  -3   9   0  101.16   15.59
  -3   9   0  123.56   19.19
  -3  -9   0  123.62   16.73
  -3  -9   0  108.97   16.00
  -3   9   0  132.43   15.48
  -3  -9   0  118.94   24.01
  -3   9  -1 1291.07  139.08
  -3   9  -1 1545.96  134.70
  -3  -9  -1 1765.46  153.80
  -3   9  -1 1470.97  132.55
  -3  -9  -1 1791.46  135.67
  -3   9  -1 1507.07  134.14
  -3  -9  -1 1418.39  133.93
  -3   9  -1 1686.75  139.69
  -3   9  -1 1492.88  136.62
  -3   9  -2   74.32   16.03
  -3   9  -2   55.70   12.81
  -3   9  -2   80.59   12.73
  -3  -9  -2   74.19   22.44
  -3   9  -2  107.07   12.62
  -3   9  -2   95.97   14.70
  -3   9  -2   68.34   13.31
  -3   9  -2   72.27   14.95
  -3  -9  -2   63.87   11.76
  -3  -9  -3  467.84   47.00
  -3   9  -3  470.26   51.28
  -3  -9  -3  582.83   68.51
  -3   9  -3  418.16   53.87
  -3   9  -3  598.91   52.39
  -3   9  -3  482.30   46.38
  -3   9  -3  466.70   47.65
  -3   9  -4   22.78    6.36
  -3   9  -4   25.06   10.22
  -3   9  -4   17.84    8.14
  -3  -9  -4   33.43   16.75
  -3   9  -4   40.29   11.39
  -3  -9  -4   33.46    7.38
  -3   9  -4   41.27   10.23
  -3  -9  -5  139.65   18.55
  -3  -9  -5  139.91   16.97
  -3   9  -5  113.89   16.96
  -3   9  -5  121.88   23.00
  -3   9  -5  128.01   20.92
   3  -9   5  148.42   16.38
  -3   9  -5  173.68   23.81
  -3   9  -5  163.62   21.37
  -3  -9  -5  126.56   15.89
  -3  -9  -6   12.17    4.02
  -3   9  -6   18.25    8.37
  -3   9  -6   13.39    5.35
  -3  -9  -6    3.72    8.88
  -3  -9  -6   12.48    5.62
  -3   9  -6   17.55    9.08
   3  -9   6   12.54    4.13
  -3   9  -6   16.96    7.92
  -3  -9  -6   14.07    3.98
  -3   9  -7  760.52   80.83
  -3  -9  -7  841.32   79.98
  -3   9  -7 1115.34   88.49
   3  -9   7  871.45   78.46
  -3   9  -7 1123.49   86.37
  -3   9  -7  837.17   79.56
  -3   9  -8   -2.25    3.37
  -3  -9  -8    0.90    3.44
   3  -9   8    8.49    5.62
   3  -9   8    0.73    2.06
  -3   9  -8    2.69    5.15
  -3   9  -8    0.88    2.48
   3  -9   9   11.00    4.24
   3  -9   9   15.33    4.24
   3  -9   9    8.49    5.55
  -3   9  -9   13.50    4.69
  -3  -9  -9   11.51    4.16
   3  -9  10    5.67    4.17
  -3   9 -10    4.13    3.54
   3  -9  10    9.09    2.89
   3  -9  10    5.47    3.07
   3  -9  11   10.06    3.77
  -3   9 -11    6.48    2.29
   3  -9  11    7.91    2.22
  -3 -10  13    0.96    1.18
   3  10 -12   19.10    4.12
   3  10 -12   16.23    3.80
   3 -10 -12   15.50    3.05
   3 -10 -11  184.94   16.91
  -3 -10  11  194.30   17.55
   3  10 -11  163.69   16.74
   3  10 -11  224.38   19.08
   3  10 -11  188.61   18.33
  -3 -10  10   92.96   11.26
   3  10 -10   90.18   11.30
   3  10 -10   97.49   12.19
   3 -10 -10   58.20    9.49
   3  10 -10   87.63   11.93
  -3 -10  10   68.68    9.61
   3  10  -9   23.70    6.15
  -3 -10   9   28.51    6.21
   3  10  -9   31.43    7.33
   3  10  -9   35.78    7.65
   3 -10  -9   19.25    5.12
  -3 -10   9   30.93    5.98
   3 -10  -8   23.51    5.69
   3  10  -8   23.02    6.32
  -3 -10   8   18.98    5.44
  -3 -10   8   30.70    6.14
  -3 -10   7 1707.39  141.49
  -3  10   7 1532.94  142.77
  -3 -10   7 1537.64  141.88
   3  10  -7 1791.10  143.99
  -3 -10   6    8.90    4.04
   3  10  -6    9.11    5.49
  -3 -10   6   15.68    7.45
  -3  10   6   11.66    4.86
  -3 -10   6   12.48    4.25
  -3  10   6   13.05    7.39
   3  10  -6   17.09   11.14
   3  10  -5    3.96    7.28
  -3 -10   5    5.53    6.19
   3  10  -5    2.29    3.44
  -3 -10   5    3.34    2.66
  -3  10   5    2.14    3.01
  -3 -10   5   -2.25    3.39
  -3  10   5   -1.50    8.43
  -3 -10   5    3.98    2.99
  -3 -10   4   27.43    5.95
  -3 -10   4   17.83    8.01
  -3 -10   4   11.91    4.76
  -3 -10   4   35.06   10.11
  -3  10   4   21.15    6.26
  -3 -10   3  653.04   68.75
  -3 -10   3  779.80   65.41
  -3 -10   3  563.74   60.20
  -3  10   3  700.23   61.87
  -3 -10   2  133.86   17.83
  -3  10   2  122.17   15.39
  -3  10   2  117.23   17.16
  -3  10   2   86.77   13.66
  -3  10   1  522.03   49.62
  -3 -10   1  505.44   59.98
  -3  10   1  496.42   50.98
  -3 -10   1  608.85   52.72
  -3  10   1  493.21   53.29
  -3  10   1  534.27   55.77
  -3  10   1  517.12   50.26
  -3  10   0    1.65    8.59
  -3  10   0    1.71    4.81
  -3 -10   0    7.89    3.97
  -3  10   0    2.36    3.07
  -3 -10   0   -3.07   14.19
  -3  10   0    0.93    3.96
  -3 -10   0    7.04    4.82
  -3  10  -1  332.40   39.08
  -3 -10  -1  429.13   55.11
  -3  10  -1  385.19   43.74
  -3  10  -1  422.01   43.08
  -3 -10  -1  431.02   40.34
  -3  10  -1  381.00   38.38
  -3 -10  -1  394.58   40.03
  -3  10  -2  140.07   18.51
  -3  10  -2  121.60   18.63
  -3  10  -2  142.44   21.50
  -3  10  -2  140.73   19.89
  -3 -10  -2  112.48   28.10
  -3  10  -2  144.43   18.51
  -3 -10  -2  129.09   18.07
  -3  10  -2  136.62   16.95
  -3 -10  -3  725.72   74.87
  -3  10  -3  809.89   78.93
  -3  10  -3  838.28   76.63
   3 -10   3  800.35   76.21
  -3  10  -3  963.57   79.43
  -3  10  -3  893.38   75.71
  -3 -10  -3  974.16   97.45
  -3 -10  -3  791.96   76.34
  -3 -10  -4   -0.94    2.65
  -3  10  -4    1.61    4.82
  -3  10  -4    6.51    5.46
  -3  10  -4   -1.51    5.33
   3 -10   4   -2.54    4.25
  -3  10  -4    1.95    3.28
  -3 -10  -4   -3.84    7.06
  -3  10  -5  384.74   39.52
  -3 -10  -5  356.64   34.70
   3 -10   5  439.31   39.78
   3 -10   5  338.05   33.76
  -3  10  -5  363.74   39.59
  -3 -10  -5  273.59   33.13
  -3  10  -5  379.53   35.88
  -3  10  -5  469.24   42.26
  -3 -10  -6   42.49    9.25
  -3 -10  -6   54.47    8.24
  -3  10  -6   63.45   12.41
  -3  10  -6   59.29   13.06
   3 -10   6   67.53   12.07
  -3  10  -6   56.38    9.59
   3 -10   6   51.94    8.31
  -3 -10  -7    2.75    3.08
  -3  10  -7   -1.34    4.04
   3 -10   7    2.57    4.73
  -3  10  -7    4.45    5.90
  -3  10  -7    3.57    3.80
   3 -10   7    4.02    2.67
   3 -10   8   16.09    4.06
  -3 -10  -8   12.15    4.67
  -3  10  -8   16.91    6.24
   3 -10   8   25.18    7.09
  -3  10  -8   16.46    7.35
  -3  10  -8   18.67    5.76
  -3  10  -8   12.39    4.23
  -3 -10  -9  145.74   16.27
  -3  10  -9  152.06   17.33
   3 -10   9  168.86   17.49
  -3  10  -9  154.06   16.65
   3 -10   9  149.25   15.73
   3 -10   9  137.19   18.05
   3 -10  10   -2.71    2.88
  -3  10 -10    0.95    1.51
   3 -10  10    3.14    2.08
  -3 -11  12   53.15    7.44
   3  11 -12   78.55    7.62
   3  11 -11  152.20   12.83
   3 -11 -11  101.06    9.45
  -3 -11  11  133.43   11.39
   3  11 -11  110.61   10.57
   3  11 -10    4.19    3.06
   3 -11 -10    4.04    2.28
   3  11 -10    0.59    2.17
  -3 -11  10    2.81    2.47
   3 -11  -9    7.56    3.19
   3  11  -9   12.26    4.03
  -3 -11   9    4.90    2.94
   3  11  -8  282.40   27.36
  -3 -11   8  230.59   25.78
  -3  11   7    7.54    5.93
  -3 -11   7    2.72    3.06
   3  11  -7    8.09    4.44
  -3  11   6   44.93    8.64
  -3  11   6   46.57   10.25
  -3 -11   6   42.37    8.42
  -3  11   5  248.49   26.26
  -3 -11   5  213.15   25.41
  -3  11   5  253.09   29.29
  -3 -11   4   63.95   12.92
   3  11  -4   87.76   17.11
  -3  11   4   97.53   16.89
  -3  11   4   79.01   12.11
  -3 -11   4   69.13   11.57
  -3 -11   3 1193.35   98.83
  -3 -11   3  951.03   94.96
  -3  11   3 1125.05   96.17
  -3  11   2  276.57   30.19
  -3  11   2  272.06   33.21
  -3  11   2  254.48   27.70
  -3 -11   2  242.80   29.35
  -3  11   2  240.80   28.72
  -3  11   2  296.42   29.08
  -3  11   1  364.71   39.26
  -3  11   1  342.41   40.45
   3 -11  -1  324.12   36.34
  -3 -11   1  379.15   37.68
  -3  11   1  376.56   36.11
  -3  11   1  351.35   37.18
  -3  11   1  353.47   36.31
  -3  11   0   29.78    7.14
  -3  11   0   26.92   10.75
  -3  11   0   36.51   10.24
  -3 -11   0   47.71    8.97
  -3 -11   0   37.50   14.32
  -3  11   0   39.32    8.10
  -3  11   0   29.98    7.96
  -3  11  -1  792.47   76.79
  -3  11  -1  936.50   81.50
  -3  11  -1  921.45   80.03
  -3 -11  -1  801.30   76.57
  -3 -11  -1  806.46   89.37
  -3  11  -1  801.48   75.42
  -3  11  -2   12.60    4.67
  -3 -11  -2   21.77    6.67
  -3  11  -2   10.75    5.08
  -3 -11  -2   30.57   14.02
  -3  11  -2   12.64    8.68
  -3  11  -2   33.12   10.02
  -3  11  -3  107.98   15.36
  -3  11  -3   82.94   13.81
  -3 -11  -3   75.70   12.30
  -3  11  -3   86.83   12.73
  -3 -11  -3   96.73   14.22
  -3  11  -3   94.17   14.13
  -3  11  -4   63.91   12.10
  -3 -11  -4   76.58   12.37
  -3 -11  -4   59.18    9.93
  -3  11  -4   72.98   10.98
  -3  11  -4  106.86   14.96
   3 -11   4   59.14   10.92
  -3  11  -5   45.76   10.30
  -3  11  -5   56.29   11.15
   3 -11   5   30.85    7.67
  -3  11  -5   41.87    9.55
  -3  11  -5   30.98    6.96
  -3 -11  -5   28.56    6.10
  -3  11  -6  269.04   26.72
  -3  11  -6  252.17   28.54
  -3  11  -6  313.56   30.72
   3 -11   6  200.58   26.68
  -3  11  -6  262.21   28.93
  -3  11  -7  295.57   27.60
  -3  11  -7  232.45   24.20
  -3  11  -7  286.81   28.00
  -3  11  -7  220.39   25.56
   3 -11   7  166.41   24.27
  -3 -11  -7  254.63   24.82
  -3  11  -8    7.07    3.74
  -3  11  -8    8.19    3.25
  -3 -11  -8   12.03    3.77
   3 -11   8   11.45    5.04
   3 -11   8   14.22    5.02
  -3  11  -8   16.90    5.38
  -3  11  -9    9.29    3.68
  -3  11  -9    4.30    2.13
   3 -11   9    6.31    3.31
  -3 -11  -9    2.55    2.01
   3 -11   9    8.56    3.09
  -3  11 -10   14.63    2.72
   3  12 -10    2.08    2.07
  -3 -12  10    0.39    1.76
   3  12  -9    3.65    2.81
  -3 -12   9   -0.54    1.99
  -3 -12   9   -2.72    3.33
   3  12  -8   56.26    9.06
  -3 -12   8   49.59    9.92
  -3 -12   8   49.00    8.03
   3  12  -8   61.97    9.21
   3  12  -7  258.79   24.78
  -3 -12   7  196.99   22.94
  -3 -12   7  215.37   25.81
   3  12  -7  223.04   22.70
   3  12  -6  130.79   15.93
  -3 -12   6  106.13   14.60
  -3  12   6  129.23   16.41
  -3 -12   6  103.39   16.69
  -3  12   5    1.82    2.60
  -3 -12   5    8.29    4.29
  -3  12   5   13.80    8.11
  -3 -12   5   13.81    5.18
  -3 -12   4   54.24   10.80
  -3 -12   4   59.68    9.93
  -3  12   4   57.41    9.84
  -3  12   3   32.49    7.47
  -3 -12   3   36.29    7.73
  -3 -12   3   46.26    9.66
  -3  12   3   54.34    9.77
  -3  12   2  126.83   16.35
  -3 -12   2  107.02   15.53
  -3  12   2  118.26   16.41
  -3  12   2  123.38   16.39
  -3  12   2  119.45   19.34
  -3 -12   2  143.20   17.64
   3 -12  -1   81.58   12.41
  -3 -12   1   85.40   12.99
  -3  12   1   93.24   13.63
  -3  12   1   95.74   13.07
  -3  12   1   66.90   11.47
  -3  12   1   79.33   15.78
  -3  12   1   87.72   13.70
   3 -12   0   93.51   14.47
  -3  12   0   99.72   14.01
  -3  12   0   90.90   14.23
  -3  12   0  118.99   18.00
  -3  12   0  101.20   15.75
  -3  12   0   94.26   13.42
  -3  12  -1   34.15    7.12
  -3  12  -1   21.38    6.46
  -3  12  -1   25.51    9.23
  -3  12  -1   25.58    8.53
   3 -12   1   25.28    7.53
  -3  12  -1   24.57    6.60
  -3 -12  -2  744.21   59.77
  -3  12  -2  686.57   62.00
  -3  12  -2  597.70   59.08
  -3  12  -2  628.56   57.70
  -3 -12  -2  523.60   56.77
  -3 -12  -3   96.05   13.85
  -3  12  -3   96.34   14.02
  -3  12  -3   93.51   15.28
  -3  12  -3  102.44   13.28
  -3 -12  -3   85.59   12.41
  -3 -12  -4  324.19   34.99
  -3 -12  -4  414.25   37.85
  -3  12  -4  410.45   36.97
  -3 -12  -5   99.08   13.06
   3 -12   5   80.31   12.00
  -3  12  -5  117.97   13.23
  -3 -12  -5   86.29   10.88
   3 -12   6    7.81    5.18
   3 -12   6    3.68    2.85
  -3  12  -6    4.95    3.66
  -3  12  -6    5.59    2.90
   3 -12   7   -0.64    2.45
  -3  12  -7   -1.76    2.15
  -3  12  -7    0.78    2.75
   3 -12   8  619.52   56.69
  -3 -12  -8  673.22   56.08
  -3  12  -8  653.28   56.83
  -3  12  -8  624.06   56.62
   3 -12   8  613.27   57.24
  -3  12  -8  642.04   56.04
   3 -12   9    5.11    1.68
  -3  13  10   38.13    4.51
  -3  13   9    2.37    1.83
   3  13  -9    0.83    1.66
  -3 -13   9    3.37    2.31
   3  13  -9    3.25    2.03
  -3 -13   9    0.67    1.19
   3  13  -8  797.57   58.90
  -3  13   8  800.92   58.78
  -3 -13   8  669.51   57.68
   3  13  -8  794.19   58.98
  -3 -13   7    1.73    2.75
   3  13  -7    0.65    2.49
   3  13  -7    4.79    3.25
  -3 -13   7    0.60    1.90
   3  13  -7   -0.45    2.12
  -3  13   7    1.33    2.82
  -3 -13   6   89.36   13.59
  -3 -13   6  107.15   13.03
   3  13  -6  125.32   14.24
  -3  13   6   98.07   13.05
  -3  13   6  106.81   13.81
  -3 -13   5    3.90    2.94
  -3  13   5    3.39    3.13
  -3 -13   5    4.62    2.84
  -3  13   5   -0.90    5.40
  -3  13   4  442.32   45.67
  -3 -13   4  468.12   46.18
  -3  13   4  606.33   48.23
  -3 -13   4  495.17   47.45
  -3  13   3    1.90    3.78
  -3 -13   3   -0.85    2.71
  -3 -13   3    1.90    3.03
  -3  13   3    0.86    2.73
  -3 -13   2  199.41   23.47
  -3  13   2  213.01   23.58
  -3 -13   2  192.52   23.12
  -3  13   2  239.74   24.73
  -3  13   2  279.69   27.54
   3 -13  -1    4.61    3.36
  -3  13   1   -0.90    2.34
  -3  13   1    0.99    3.48
  -3  13   1   -2.38    6.80
  -3 -13   1   -1.71    3.14
  -3  13   0  258.18   25.73
  -3  13   0  263.51   27.10
  -3  13   0  233.33   27.27
   3 -13   0  216.60   24.97
  -3  13   0  208.58   25.19
  -3 -13  -1    0.84    2.82
  -3  13  -1    4.02    2.56
  -3  13  -1    2.70    3.16
  -3  13  -1   -1.11    6.45
  -3  13  -1   -1.02    5.72
   3 -13   1   -4.07    5.61
  -3 -13  -2   51.13    8.37
  -3  13  -2   54.05    8.59
  -3  13  -2   44.89    8.48
  -3  13  -2   65.90   11.23
  -3  13  -2   44.45    9.33
   3 -13   2   52.72   10.00
  -3 -13  -3   -0.64    2.16
  -3  13  -3    3.73    2.51
  -3  13  -3    5.06    3.35
  -3  13  -3   11.75    5.56
   3 -13   3    8.66    4.88
   3 -13   4  186.36   21.78
  -3  13  -4  206.59   20.03
  -3 -13  -4  166.94   18.29
  -3  13  -5   -0.89    3.27
   3 -13   5    5.59    4.54
  -3  13  -5    1.82    2.04
  -3  13  -6  359.32   34.11
  -3  13  -6  425.14   33.32
   3 -13   6  379.34   34.93
   3 -13   7    0.51    1.89
  -3  13  -7    1.70    1.51
  -3  13  -7    6.71    2.07
  -3  13  -7    3.51    2.45
   3 -13   8    1.92    1.21
  -3  14   8   20.73    3.12
   3  14  -8   15.44    2.91
  -3  14   7  116.42   10.18
  -3 -14   7   96.22    9.17
   3  14  -7  122.17   10.65
   3  14  -6   64.18    8.04
  -3  14   6   76.07    9.01
  -3 -14   6   81.67    8.78
  -3 -14   5    2.58    2.28
  -3  14   5    3.11    2.57
  -3 -14   5    3.89    2.65
  -3  14   5    6.33    4.61
  -3 -14   4   40.57    7.35
  -3 -14   4   56.02    8.11
   3  14  -4   57.25    8.33
  -3  14   4   62.47    8.73
  -3 -14   3    5.88    3.10
   3  14  -3   10.44    3.97
  -3  14   3   10.00    6.10
  -3  14   3    7.35    3.16
  -3  14   3   10.98    4.09
  -3  14   2  104.15   12.58
  -3 -14   2   94.45   11.84
  -3  14   2   82.81   11.94
  -3  14   2   92.06   13.60
  -3  14   1   21.12    4.79
  -3  14   1   13.99    6.13
  -3  14   1    9.99    3.83
  -3 -14   1   14.67    4.23
  -3 -14   0   18.07    5.21
  -3  14   0   38.16    6.60
   3 -14   0   46.45    6.79
  -3  14   0   39.39    8.30
  -3 -14   0   23.09    5.26
  -3 -14  -1    8.80    3.52
  -3  14  -1   17.93    4.58
   3 -14   1   11.38    4.08
  -3  14  -1   17.74    5.36
  -3  14  -1   19.28    6.35
  -3 -14  -1   14.34    3.76
   3 -14   2  331.33   33.60
  -3  14  -2  426.98   35.14
  -3  14  -2  340.81   32.73
  -3  14  -2  356.37   33.42
  -3 -14  -2  312.26   32.06
   3 -14   3   62.69    9.86
  -3  14  -3   82.17    9.60
  -3  14  -3   74.67    9.81
  -3 -14  -3   65.07    8.30
   3 -14   4  157.36   17.71
  -3  14  -4  187.68   18.54
  -3  14  -4  147.50   16.07
  -3  14  -4  155.35   16.76
   3 -14   5   91.94   11.19
  -3  14  -5   86.99    9.78
  -3  14  -5   92.64   11.14
   3 -14   6    0.82    1.44
  -3  14  -6   -0.80    1.58
   3 -14   6    0.43    1.72
  -3  15   6   34.59    4.43
  -3  15   5  145.70   11.53
   3  15  -5   78.94    9.69
  -3  15   5  146.33   11.25
   3  15  -5  136.53   11.26
  -3 -15   5   83.18   10.08
  -3 -15   5   60.85    9.47
   3  15  -4   14.52    3.41
   3  15  -4   15.00    3.24
  -3  15   4   10.43    2.86
  -3 -15   4    9.15    2.76
  -3 -15   4    4.55    1.89
  -3 -15   3  209.85   24.76
  -3  15   3  265.54   25.90
  -3 -15   2  175.68   17.47
  -3  15   2  133.14   16.52
  -3 -15   1   84.49   10.90
  -3  15   1   91.10   11.28
  -3 -15   0    7.78    2.78
  -3  15   0   13.41    4.39
  -3  15   0   10.72    3.48
  -3 -15  -1  191.47   18.05
  -3  15  -1  209.05   18.34
  -3  15  -1  181.54   18.40
   3 -15   1  161.08   17.30
  -3  15  -2    8.28    2.61
   3 -15   2    8.60    2.52
  -3 -15  -2    1.44    1.93
  -3  15  -3    8.78    2.51
   3 -15   3   12.57    2.98
  -3  15  -4   56.35    5.79
  -3  15  -4   20.80    3.85
   3  16  -2    8.51    2.09
  -3  16   2   13.09    2.61
   3  16   0    0.23    0.97
  -4   0  15    4.33    3.06
  -4   0  15   -2.45    2.74
  -4   0  14    8.19    5.02
  -4   0  14    9.27    5.30
  -4   0  13    1.65    5.26
  -4   0  13   -1.84    5.16
  -4   0  12  540.61   59.35
  -4   0  12  601.65   54.79
  -4   0  11    2.18    8.67
  -4   0  11    5.41    8.12
  -4   0  11    2.26    2.95
  -4   0  11    2.45    2.60
  -4   0  10  169.71   30.01
  -4   0  10  315.70   51.56
  -4   0  10  232.32   27.02
  -4   0  10  282.89   27.96
  -4   0  10  223.27   26.61
  -4   0  10  197.48   30.87
  -4   0   9   -1.25    3.26
  -4   0   9    1.41    4.23
  -4   0   9   -2.26    7.95
  -4   0   9    5.55    8.33
  -4   0   9    1.16    2.75
  -4   0   9    8.96    5.82
  -4   0   9    1.24    2.94
  -4   0   8  241.20   44.39
  -4   0   8  181.28   31.27
  -4   0   8  298.80   34.50
  -4   0   8  251.89   29.29
  -4   0   8  274.82   29.31
  -4   0   8  305.73   29.34
  -4   0   7    1.48    2.22
  -4   0   7   -4.06    4.31
  -4   0   6 1095.00   87.28
  -4   0   6  903.38   95.05
  -4   0   6  945.93   85.17
  -4   0   6  773.15   81.48
  -4   0   5    2.53    4.66
  -4   0   5    0.84    2.00
  -4   0   5    3.81    3.30
  -4   0   4 2159.93  175.93
  -4   0   4 1818.97  164.47
  -4   0   4 2080.59  168.48
  -4   0   3   -1.73    3.19
  -4   0   3    1.83    4.75
  -4   0   3    2.78    2.78
  -4   0   2   14.95    7.13
  -4   0   2   19.11    7.46
  -4   0   2    9.44    5.39
  -4   0   1   -1.61    5.41
  -4   0   1    6.08    4.27
  -4   0   1    1.69    5.37
  -4   0   0 3845.99  331.00
  -4   0  -1    3.88    5.46
  -4   0  -2  125.57   17.34
  -4   0  -2  163.39   24.32
  -4   0  -3    1.47    2.70
  -4   0  -3   -2.84    7.39
  -4   0  -4 1108.11   98.07
  -4   0  -4  885.50  105.23
  -4   0  -5   -1.36    4.09
  -4   0  -5    4.06    2.86
  -4   0  -5   -0.76    2.79
  -4   0  -5   -2.20    4.66
  -4   0  -5   -4.53    9.61
  -4   0  -5   -4.81    6.37
  -4   0  -6   -1.91    6.42
  -4   0  -6   -2.97    4.99
  -4   0  -6    2.15    3.79
  -4   0  -6    7.49    5.92
  -4   0  -6   -5.46   10.03
  -4   0  -6    4.53    3.19
  -4   0  -6    3.43    3.28
  -4   0  -7    2.14    6.82
  -4   0  -7    1.55    4.34
  -4   0  -7    1.11    4.57
  -4   0  -7   -2.72    4.08
  -4   0  -7   -6.15   14.60
  -4   0  -7   -0.94    3.17
  -4   0  -8   17.60    9.09
  -4   0  -8   16.77    7.12
  -4   0  -8    8.82    5.19
  -4   0  -8    5.67    5.30
  -4   0  -8   19.09   15.13
  -4   0  -8   15.86    5.55
  -4   0  -9    4.23    5.40
  -4   0  -9    2.06    6.18
  -4   0  -9   -5.98   14.20
  -4   0  -9    8.35    7.24
  -4   0  -9    5.10    4.84
  -4   0 -10   33.87    8.76
  -4   0 -10   55.77   13.74
  -4   0 -11   -4.74    4.17
  -4   0 -11   -4.00    6.64
  -4   0 -12   19.04    5.04
  -4   0 -12   15.34    6.38
  -4   0 -13    2.02    2.73
  -4  -1  15    4.32    3.04
  -4   1  15    1.46    2.19
  -4  -1  15    1.44    2.66
  -4   1  14  227.24   23.03
  -4  -1  14  227.75   22.90
  -4  -1  13  178.25   22.54
  -4   1  13  147.84   20.62
  -4  -1  13  149.45   22.43
   4   1 -13  116.57   14.33
  -4  -1  13  113.11   15.01
   4   1 -12   91.04   12.82
  -4  -1  12   86.58   13.45
  -4   1  12  116.60   20.02
  -4  -1  12  123.68   19.40
  -4   1  11   42.28    8.18
  -4  -1  11   29.83    8.49
  -4  -1  11   54.98    9.92
  -4  -1  11   50.95    9.99
  -4  -1  11   38.97   12.75
  -4  -1  11   21.54   19.20
  -4   1  11   30.60   18.99
  -4   1  11   56.41   14.21
  -4  -1  11   16.36    8.05
  -4  -1  10  275.69   31.53
  -4  -1  10  294.22   32.63
  -4   1  10  282.62   38.17
  -4  -1  10  273.59   37.14
  -4  -1  10  257.20   36.85
  -4   1  10  354.71   54.79
  -4  -1  10  321.30   53.64
  -4  -1  10  397.91   36.49
  -4   1  10  270.02   31.22
  -4  -1   9  138.68   18.43
  -4   1   9  135.20   18.16
  -4  -1   9  129.59   17.38
  -4  -1   9  101.32   20.40
  -4   1   9  153.12   24.15
  -4  -1   9  136.97   21.91
  -4  -1   9  139.68   33.07
  -4  -1   9  122.15   22.11
  -4   1   9  156.72   20.58
  -4  -1   9  158.49   20.02
  -4   1   9  107.79   16.86
  -4  -1   8 1715.20  153.55
  -4   1   8 1886.63  154.98
  -4  -1   8 1846.24  155.15
  -4  -1   8 2062.19  156.10
  -4   1   8 1956.48  156.44
  -4   1   8 1792.17  154.72
  -4  -1   8 1670.66  159.00
  -4  -1   8 1342.76  156.91
  -4  -1   8 1790.73  177.34
  -4  -1   8 1540.54  158.22
  -4   1   7  224.66   28.16
  -4  -1   7  180.02   25.42
  -4  -1   7  205.97   26.46
  -4  -1   7  213.46   27.20
  -4  -1   7  282.42   40.34
  -4   1   7  171.65   25.84
  -4   1   6  280.34   32.55
  -4  -1   6  251.02   30.58
  -4  -1   6  301.08   40.53
  -4  -1   6  314.22   32.80
  -4   1   6  249.46   31.86
  -4  -1   5    2.12    2.52
  -4   1   5    5.34    4.01
  -4  -1   5    2.52    3.27
  -4  -1   5   -2.42    4.46
  -4  -1   4 2634.95  236.71
  -4   1   4 2882.58  238.95
  -4  -1   4 2731.99  238.48
  -4  -1   4 3144.85  246.10
  -4  -1   3  277.62   31.89
  -4  -1   3  191.26   22.78
  -4   1   3  228.33   24.47
  -4  -1   3  287.78   30.60
  -4  -1   2  713.64   67.84
  -4   1   2  656.39   60.87
  -4  -1   2  712.08   67.95
  -4  -1   2  646.60   65.79
  -4   1   1    3.26    6.69
  -4  -1   1   -1.67    5.61
  -4  -1   1    5.97    4.48
  -4  -1   1    5.24    5.57
  -4   1   0   12.97    6.76
  -4  -1   0   14.48    7.52
  -4   1  -1  164.77   23.09
  -4  -1  -1  170.66   24.97
  -4   1  -2   -0.94    2.44
  -4  -1  -2   -1.23    2.60
  -4   1  -2    3.22    4.18
  -4  -1  -2    7.09    6.14
  -4   1  -3    1.40    2.96
  -4  -1  -3    1.57    3.33
  -4  -1  -3   -2.90    6.16
  -4   1  -3    3.20    4.49
  -4  -1  -4 1525.51  144.60
  -4  -1  -4 1629.54  137.56
  -4   1  -4 1397.19  143.26
  -4  -1  -4 1620.38  137.44
  -4   1  -4 1517.21  137.12
  -4  -1  -4 1692.78  157.30
  -4  -1  -4 1787.87  139.89
  -4  -1  -5   18.64    5.92
  -4  -1  -5   12.23    5.62
  -4  -1  -5   11.15    6.43
  -4   1  -5   12.03    4.40
  -4  -1  -5   17.12    4.79
  -4  -1  -5   22.50   13.55
  -4  -1  -5   11.02    6.29
  -4   1  -5   11.15    6.36
  -4  -1  -6   14.83    7.46
  -4   1  -6    7.67    5.48
  -4  -1  -6   18.56    6.60
  -4   1  -6   19.64    6.39
  -4  -1  -6    3.95    3.78
  -4  -1  -6   22.41    9.32
  -4  -1  -6    6.28    3.77
  -4   1  -6    3.64    4.06
  -4  -1  -6   13.04    4.13
  -4  -1  -6   10.66   12.67
  -4   1  -6   10.64    5.34
  -4  -1  -7   13.36    7.60
  -4   1  -7   16.81    9.00
  -4  -1  -7   18.02    6.55
  -4   1  -7   16.87    6.09
  -4  -1  -7   12.28    5.91
  -4   1  -7    5.31    5.76
  -4  -1  -7   12.33    8.81
  -4  -1  -7   14.19    4.77
  -4   1  -7   19.09    5.77
  -4  -1  -7   23.63   17.77
  -4   1  -7   18.19    6.75
  -4  -1  -8  477.99   64.51
  -4   1  -8  555.81   67.64
  -4  -1  -8  656.20   60.31
  -4   1  -8  734.77   63.91
  -4  -1  -8  629.02   58.38
  -4   1  -8  562.01   57.63
  -4   1  -8  617.47   57.87
  -4  -1  -8  587.44   56.65
  -4  -1  -8  722.57   66.18
  -4  -1  -8  572.53   83.29
  -4   1  -8  621.82   60.07
  -4   1  -9   72.91   14.64
  -4  -1  -9   88.81   13.84
  -4  -1  -9   65.70   14.92
  -4   1  -9   76.09   12.40
  -4  -1  -9   95.24   27.36
  -4   1  -9   94.98   30.24
  -4   1 -10  234.78   30.60
  -4  -1 -10  280.41   30.19
  -4  -1 -11   34.79    9.22
  -4  -1 -11   38.80    7.75
  -4   1 -11   42.64    8.86
  -4  -1 -12   68.86   11.74
  -4   1 -12   91.95   11.07
  -4  -1 -12   63.09    9.30
  -4   1 -13  229.78   21.91
  -4  -1 -13  239.68   22.68
  -4   2  15  282.44   32.04
  -4  -2  15  335.34   33.31
  -4  -2  14  129.96   16.21
  -4   2  14  134.61   15.36
  -4   2  14  112.76   15.01
   4   2 -14   83.14   11.05
  -4  -2  13   37.85   10.29
  -4   2  13   37.07    9.02
  -4   2  13   10.22    6.22
   4   2 -13   36.59    6.61
  -4  -2  13   27.85    6.33
  -4  -2  12   51.95    9.90
   4   2 -12   58.65    9.56
  -4   2  12   76.13   14.36
  -4  -2  12   75.87   14.90
  -4  -2  12   57.68   10.98
  -4   2  11  295.87   36.02
  -4  -2  11  276.76   30.41
  -4  -2  11  297.09   32.06
  -4  -2  11  287.74   35.65
  -4   2  11  213.60   32.01
  -4  -2  11  366.39   53.42
  -4   2  11  309.59   47.97
  -4   2  11  272.42   37.78
  -4  -2  10  348.39   42.42
  -4  -2  10  470.41   62.90
  -4   2  10  444.26   60.42
  -4   2  10  316.31   41.32
  -4   2  10  360.28   43.37
  -4  -2  10  358.87   37.31
  -4  -2  10  351.93   38.31
  -4  -2  10  395.78   39.92
  -4   2  10  373.33   46.62
  -4  -2  10  352.75   42.84
  -4  -2  10  317.43   43.45
  -4  -2   9  316.41   40.39
  -4  -2   9  290.32   40.92
  -4   2   9  328.34   35.91
  -4  -2   9  363.94   41.65
  -4   2   9  280.92   39.32
  -4  -2   9  443.36   59.68
  -4   2   9  284.66   51.68
  -4  -2   9  388.77   38.34
  -4  -2   9  377.40   36.67
  -4  -2   9  372.08   37.94
  -4   2   9  445.96   45.12
  -4   2   8  143.29   22.38
  -4  -2   8  110.10   18.79
  -4  -2   8  111.22   18.12
  -4   2   8  101.33   14.59
  -4  -2   8  102.11   24.95
  -4   2   8  136.77   29.35
  -4   2   8   58.23   15.97
  -4  -2   8   76.50   16.63
  -4  -2   8   66.42   11.83
  -4  -2   8  118.11   16.03
  -4   2   8  153.17   17.58
  -4  -2   8  145.22   16.09
  -4   2   8  111.07   19.51
  -4  -2   8  140.62   16.57
  -4  -2   7    0.81    1.73
  -4  -2   7    7.02    6.46
  -4   2   7    3.77    5.66
  -4   2   7    5.82    5.82
  -4  -2   7    1.74    3.20
  -4   2   7   -2.06    3.10
  -4  -2   7   11.70    5.61
  -4  -2   7    9.04    4.75
  -4   2   6  456.69   48.23
  -4  -2   6  441.77   46.31
  -4   2   6  370.14   45.07
  -4  -2   6  539.97   47.28
  -4  -2   6  464.80   54.16
  -4   2   6  420.29   53.94
  -4   2   5  410.02   49.28
  -4  -2   5  425.70   48.52
  -4  -2   5  425.73   42.91
  -4   2   5  415.92   43.97
  -4  -2   4  591.21   54.25
  -4   2   4  495.88   53.42
  -4  -2   4  454.65   47.24
  -4   2   4  472.90   48.05
  -4  -2   3    3.24    3.85
  -4   2   3   10.63    5.64
  -4   2   3   -1.74    4.89
  -4   2   3    1.78    3.77
  -4  -2   3    5.93    6.96
  -4  -2   3    5.78    3.83
  -4   2   3    0.95    2.03
  -4  -2   2    3.00    3.18
  -4   2   2    8.12    5.17
  -4  -2   2   -1.79    5.38
  -4   2   2    4.80    5.63
  -4   2   2    1.77    5.30
  -4   2   2    2.28    2.42
  -4   2   1   46.66   10.86
  -4  -2   1   39.86   11.04
  -4  -2   1   20.81    8.26
  -4   2   1   32.27    9.18
  -4  -2   0 3186.90  272.71
  -4   2   0 2934.65  270.15
  -4   2   0 3323.59  272.76
  -4   2  -1  129.29   20.49
  -4  -2  -1  123.30   21.42
  -4   2  -1  157.75   22.68
  -4  -2  -2    4.78    7.18
  -4   2  -2    2.09    4.97
  -4   2  -2    5.56    3.06
  -4   2  -2    7.24    6.38
  -4  -2  -3   25.95   11.54
  -4   2  -3   22.88    9.46
  -4   2  -3   17.92    7.27
  -4   2  -3   20.04    6.35
  -4  -2  -3   11.76    6.09
  -4  -2  -4  106.32   13.32
  -4  -2  -4  123.32   25.18
  -4   2  -4  107.86   22.98
  -4  -2  -4   84.92   17.03
  -4  -2  -4  111.11   13.60
  -4   2  -4   88.83   17.05
  -4   2  -4  131.69   19.23
  -4   2  -4   96.30   13.19
  -4  -2  -4  108.75   14.70
  -4   2  -5 1325.44  123.99
  -4  -2  -5 1534.60  126.55
  -4  -2  -5 1589.24  149.13
  -4   2  -5 1334.06  142.39
  -4   2  -5 1499.46  130.71
  -4  -2  -5 1613.15  127.09
  -4  -2  -5 1348.52  125.42
  -4  -2  -5 1291.99  123.68
  -4  -2  -5 1678.83  130.57
  -4   2  -5 1463.84  128.42
  -4  -2  -5 1509.07  134.51
  -4  -2  -5 1392.81  124.06
  -4   2  -5 1244.35  131.98
  -4   2  -5 1520.68  130.67
  -4  -2  -6  104.20   21.50
  -4   2  -6  114.21   22.60
  -4   2  -6  159.65   19.41
  -4  -2  -6  165.68   19.55
  -4   2  -6  144.94   22.45
  -4   2  -6  148.77   18.35
  -4  -2  -6  129.58   18.02
  -4  -2  -6  140.22   17.00
  -4  -2  -6  152.85   34.20
  -4   2  -6   72.09   24.97
  -4   2  -6  122.29   19.07
  -4   2  -6  137.85   17.33
  -4  -2  -6  164.56   22.98
  -4   2  -6  143.85   22.01
  -4   2  -7  203.50   32.36
  -4  -2  -7  196.10   30.75
  -4   2  -7  214.18   25.37
  -4  -2  -7  231.39   25.97
  -4  -2  -7  190.72   24.38
  -4  -2  -7  233.68   29.85
  -4   2  -7  181.57   27.52
  -4  -2  -7  189.85   22.42
  -4   2  -7  221.96   27.19
  -4   2  -7  231.63   24.81
  -4  -2  -7  249.71   24.42
  -4  -2  -7  235.73   44.92
  -4   2  -7  137.18   36.82
  -4  -2  -8   94.94   14.90
  -4   2  -8   88.82   14.19
  -4  -2  -8   78.69   18.82
  -4   2  -8   62.98   17.53
  -4  -2  -8  161.26   35.14
  -4   2  -8   75.10   26.51
  -4  -2  -8  134.49   20.44
  -4   2  -8   76.19   17.31
  -4  -2  -8  115.47   13.75
  -4   2  -8  116.49   17.13
  -4   2  -9  852.15   85.09
  -4  -2  -9  948.33   81.60
  -4   2  -9  935.33   88.85
  -4  -2  -9  866.26   83.26
  -4   2  -9 1026.89   89.12
  -4   2  -9  773.81   82.23
  -4  -2 -10   -4.31    6.10
  -4   2 -10   -1.63    6.90
  -4   2 -10   -1.46    6.18
  -4  -2 -10   -2.85    4.84
  -4   2 -10    3.43    3.96
  -4   2 -11    6.23    5.62
  -4  -2 -11    9.82    6.67
  -4   2 -11   11.06    5.40
  -4  -2 -11    2.93    3.04
  -4  -2 -12   -0.73    3.55
  -4   2 -12    0.83    3.64
  -4   2 -12    3.76    3.66
  -4  -2 -13   16.20    3.48
  -4   2 -13   15.12    3.60
  -4   2 -13   17.04    3.43
  -4   2 -13   10.75    2.84
  -4  -3  15    2.29    2.56
  -4   3  15    1.26    1.61
  -4  -3  15    0.53    1.79
  -4   3  14   86.43   12.30
  -4  -3  14   99.65   11.27
   4   3 -14   82.63   10.45
  -4  -3  14  121.19   14.33
  -4   3  14  105.24   12.73
  -4  -3  13  827.27   68.16
  -4   3  13  761.61   68.74
  -4  -3  13  932.13   72.05
  -4   3  13  711.14   68.30
  -4  -3  13  672.65   72.04
  -4  -3  13  707.07   66.52
   4   3 -13  616.03   64.82
  -4  -3  12    4.92    3.82
  -4   3  12   15.93    6.62
   4   3 -12   19.82    6.44
  -4  -3  12   15.85    7.77
  -4   3  12   25.67    8.23
  -4  -3  11  583.79   54.54
  -4  -3  11  494.01   54.70
  -4   3  11  664.82   60.81
  -4  -3  11  677.31   61.95
  -4   3  11  467.49   61.48
  -4   3  11  553.50   58.40
  -4  -3  10  274.31   33.62
  -4  -3  10  270.38   44.93
  -4   3  10  243.28   41.89
  -4   3  10  220.86   31.45
  -4   3  10  192.36   31.15
  -4  -3  10  260.55   36.30
  -4  -3  10  342.32   33.19
  -4  -3  10  321.58   32.12
  -4  -3  10  277.71   29.49
  -4  -3   9  372.32   36.97
  -4   3   9  393.77   46.36
  -4  -3   9  380.94   43.55
  -4   3   9  245.71   36.63
  -4  -3   9  360.66   39.20
  -4  -3   9  508.44   58.71
  -4   3   9  321.88   49.71
  -4   3   9  307.51   39.22
  -4  -3   9  412.86   38.51
  -4  -3   9  415.30   36.66
  -4  -3   9  232.06   32.09
  -4  -3   9  386.90   33.20
  -4  -3   8   72.21   14.87
  -4   3   8   54.60   14.61
  -4  -3   8   75.85   14.27
  -4   3   8   43.78   12.42
  -4  -3   8   63.72   10.95
  -4   3   8   26.80    9.87
  -4  -3   8   62.26   11.48
  -4  -3   8   77.92   19.88
  -4   3   8   62.09   19.03
  -4  -3   8   69.40    8.81
  -4   3   7  331.21   35.51
  -4  -3   7  338.53   33.94
  -4  -3   7  316.96   38.12
  -4   3   7  309.58   37.60
  -4  -3   7  351.14   45.43
  -4   3   7  237.13   42.09
  -4   3   7  282.52   36.34
  -4   3   6   21.21    6.49
  -4  -3   6   33.64    7.85
  -4   3   6   23.16    7.29
  -4  -3   6   17.63    6.38
  -4  -3   6   20.28    9.09
  -4   3   6   11.38    8.18
  -4  -3   5  319.82   37.10
  -4   3   5  314.11   38.29
  -4   3   5  358.11   35.54
  -4   3   5  378.19   37.15
  -4   3   5  314.85   41.54
  -4  -3   5  405.15   42.68
  -4  -3   4  165.88   22.95
  -4   3   4  157.56   23.58
  -4   3   4  113.82   21.13
  -4  -3   4  187.81   21.34
  -4   3   4  148.27   20.36
  -4  -3   3  728.94   66.62
  -4   3   3  621.52   66.31
  -4   3   3  689.78   68.25
  -4  -3   3  672.83   63.41
  -4   3   3  656.05   62.34
  -4   3   2    4.90    4.60
  -4  -3   2    7.33    4.69
  -4  -3   2    1.87    5.97
  -4   3   2   -1.60    6.15
  -4  -3   2    6.74    3.79
  -4   3   2    6.95    2.98
  -4   3   2    2.00    4.76
  -4  -3   1  454.58   46.37
  -4   3   1  385.03   42.96
  -4   3   1  392.18   43.15
  -4  -3   1  383.36   44.38
  -4  -3   0  349.94   42.95
  -4   3   0  378.09   41.72
  -4   3   0  430.20   46.30
  -4  -3  -1 2392.95  214.70
  -4   3  -1 2254.19  211.59
  -4   3  -1 2695.62  216.82
  -4   3  -2    2.16    6.47
  -4  -3  -2    2.37    6.16
  -4   3  -2    1.98    5.14
  -4   3  -3   40.09   12.56
  -4  -3  -3   42.19    7.52
  -4  -3  -3   37.18    7.15
  -4  -3  -3   60.29    9.19
  -4   3  -3   54.84    8.23
  -4   3  -3   53.02   13.63
  -4  -3  -3   34.75    7.04
  -4  -3  -4  253.88   27.70
  -4  -3  -4  271.58   27.02
  -4  -3  -4  292.53   27.26
  -4  -3  -4  314.91   42.18
  -4   3  -4  239.13   36.69
  -4  -3  -4  244.53   26.70
  -4   3  -4  258.94   33.74
  -4   3  -4  220.12   31.46
  -4  -3  -4  263.23   33.62
  -4  -3  -5  377.08   45.11
  -4  -3  -5  397.59   37.13
  -4   3  -5  296.14   43.07
  -4   3  -5  398.85   44.26
  -4   3  -5  389.33   39.56
  -4  -3  -5  450.27   40.33
  -4  -3  -5  406.09   38.65
  -4   3  -5  252.57   39.70
  -4   3  -5  328.48   39.62
  -4  -3  -5  400.05   38.84
  -4   3  -5  367.00   39.40
  -4  -3  -5  440.61   41.71
  -4   3  -5  378.57   37.39
  -4  -3  -5  360.16   36.57
  -4  -3  -5  407.57   54.19
  -4   3  -5  384.63   52.16
  -4  -3  -6   65.65   21.06
  -4   3  -6   25.29   14.57
  -4   3  -6   41.64    9.05
  -4   3  -6   27.66   10.68
  -4  -3  -6   45.19    8.97
  -4   3  -6   38.51    9.81
  -4  -3  -6   37.67   11.83
  -4   3  -6   38.82   12.62
  -4   3  -6   40.21   10.10
  -4  -3  -6   75.66   14.05
  -4  -3  -6   44.42    8.23
  -4   3  -6   43.72    8.83
  -4  -3  -7   63.84    9.98
  -4   3  -7   65.91   11.11
  -4  -3  -7   54.51    8.81
  -4   3  -7   39.63    9.94
  -4   3  -7   44.87    9.45
  -4   3  -7   93.14   17.24
  -4  -3  -7   58.10   10.43
  -4   3  -7   51.33   11.99
  -4  -3  -7   52.85   14.45
  -4   3  -7   57.28   15.99
  -4  -3  -7   68.35   13.79
  -4   3  -7   35.16   10.57
  -4  -3  -7   60.55   20.87
  -4   3  -7   76.40   23.10
  -4  -3  -8    3.81    3.34
  -4  -3  -8    2.67    4.01
  -4   3  -8    4.72    5.16
  -4  -3  -8    4.62   10.97
  -4   3  -8    5.02    9.22
  -4   3  -8    5.16    5.30
  -4   3  -8    1.62    4.21
  -4  -3  -8    2.17    4.15
  -4   3  -8    2.12    7.48
  -4  -3  -8    6.43    6.38
  -4   3  -8   -1.75    5.56
  -4  -3  -9  434.32   42.44
  -4   3  -9  368.57   45.06
  -4   3  -9  344.76   41.84
  -4   3  -9  486.96   46.42
  -4  -3 -10  240.31   26.85
  -4   3 -10  184.64   26.25
  -4  -3 -10  251.07   24.53
  -4   3 -10  212.41   24.21
  -4   3 -11  264.10   33.44
  -4  -3 -11  308.74   32.75
  -4   3 -12    7.00    4.13
  -4  -3 -12    8.16    3.57
  -4   3 -12   11.12    3.20
  -4   3 -12    6.71    3.94
  -4   3 -13  564.78   49.91
  -4   3 -13  536.49   50.27
  -4  -3 -13  621.45   49.66
   4  -3  13  571.98   49.71
  -4  -4  14   90.29   12.25
   4   4 -14  117.94   12.74
  -4  -4  14  111.77   13.92
  -4   4  14  112.63   13.19
  -4  -4  14  122.85   16.43
   4   4 -13   23.13    5.65
  -4  -4  13   15.56    5.22
  -4  -4  13   37.92    8.17
  -4   4  13   29.79    6.54
  -4  -4  13   12.83    5.08
  -4  -4  13   19.24    8.26
  -4   4  13   16.36    5.67
  -4  -4  12   29.70    7.21
  -4   4  12   37.75    9.26
   4   4 -12   37.03    8.61
  -4   4  12   42.02    9.07
  -4  -4  12   54.44   11.16
  -4  -4  12   41.16    9.09
   4   4 -11  143.00   16.37
  -4   4  11  111.00   18.96
  -4  -4  11  192.91   23.27
  -4  -4  11  149.60   20.00
  -4  -4  11  128.16   17.75
  -4   4  11  134.16   20.28
  -4  -4  10   60.54   18.80
  -4   4  10   66.49   19.03
  -4  -4  10   69.84   12.83
  -4  -4  10   71.55   16.32
  -4   4  10   71.12   17.55
  -4  -4  10  103.91   16.56
  -4   4  10   63.44   13.31
   4   4 -10   62.27    9.95
  -4  -4  10   58.75    9.57
  -4  -4  10   72.93   12.98
  -4   4  10   83.37   14.88
  -4  -4  10   62.80   11.35
  -4  -4   9 1586.51  126.28
  -4  -4   9 1188.95  130.33
  -4   4   9 1268.30  127.08
  -4  -4   9 1583.71  142.98
  -4   4   9 1261.52  137.86
  -4  -4   9 1315.55  121.07
  -4  -4   9 1392.73  126.38
  -4  -4   9 1292.54  123.44
  -4   4   9 1541.48  129.57
  -4  -4   8   -2.20    4.68
  -4   4   8   -1.57    3.72
  -4  -4   8    2.96    3.85
  -4  -4   8    0.67    1.73
  -4  -4   8    3.47    3.47
  -4  -4   8   -1.43    3.71
  -4  -4   8    3.18    8.26
  -4   4   8   -3.32    7.88
  -4   4   8    5.18    5.18
  -4  -4   7   46.01   13.68
  -4   4   7   20.76   10.70
  -4  -4   7   38.09    7.63
  -4  -4   7   31.36    9.60
  -4   4   7   21.26    7.89
  -4  -4   7   38.27    8.57
  -4   4   7   24.36    8.07
  -4  -4   7   22.72    6.78
  -4   4   6   55.69   11.01
  -4  -4   6   71.53   11.36
  -4  -4   6   65.95   15.11
  -4   4   6   33.34   12.27
  -4   4   6   66.94   11.37
  -4  -4   6   66.10   13.08
  -4   4   5  396.06   45.76
  -4  -4   5  532.83   46.50
  -4   4   5  565.99   49.31
  -4  -4   5  502.92   52.33
  -4   4   5  475.70   53.30
  -4   4   5  474.45   46.69
  -4   4   5  453.54   45.38
  -4  -4   5  507.52   50.30
  -4  -4   4   18.67    6.18
  -4   4   4   14.09    7.47
  -4   4   4   14.64    5.75
  -4   4   4    8.43    4.11
   4   4  -4   14.91    4.21
  -4  -4   4    6.35    5.16
  -4  -4   4   13.34    6.21
  -4   4   4   17.13    7.07
  -4   4   3  173.90   27.04
  -4  -4   3  256.29   27.00
  -4   4   3  161.66   24.57
  -4  -4   3  192.45   23.87
  -4   4   3  180.79   22.51
  -4   4   2  233.43   29.15
  -4  -4   2  266.48   32.23
  -4   4   2  215.27   31.31
  -4  -4   2  254.38   28.38
  -4   4   2  211.98   27.82
  -4  -4   2  239.91   27.16
  -4   4   2  202.52   23.64
  -4   4   1  322.93   36.82
  -4  -4   1  325.78   38.78
  -4   4   1  291.13   35.61
  -4  -4   1  360.26   39.81
  -4  -4   0  229.05   29.90
  -4   4   0  206.66   26.92
  -4   4   0  198.96   31.60
  -4  -4   0  204.16   28.59
  -4   4   0  224.34   27.28
  -4   4  -1   56.39   15.95
  -4  -4  -1   77.02   15.54
  -4   4  -1   57.39   12.84
  -4  -4  -2  168.93   26.88
  -4   4  -2  193.45   25.59
  -4  -4  -2   88.10   20.54
  -4  -4  -2  180.24   19.42
  -4   4  -2  198.69   30.14
  -4   4  -2  168.94   18.20
  -4   4  -2  166.08   17.63
  -4  -4  -2  179.12   18.59
  -4  -4  -3    8.74    3.74
  -4  -4  -3    5.95    3.09
  -4   4  -3    3.08    2.75
  -4   4  -3    2.62    5.58
  -4  -4  -3    4.26    3.41
  -4  -4  -3    7.94    6.29
  -4   4  -3   17.45    7.69
  -4  -4  -4  250.27   27.44
  -4  -4  -4  268.75   27.32
  -4   4  -4  300.04   37.53
  -4   4  -4  274.88   30.46
  -4  -4  -4  259.53   38.42
  -4   4  -4  205.57   33.83
  -4   4  -4  285.86   34.26
  -4   4  -4  282.26   28.76
  -4   4  -4  244.12   27.05
  -4  -4  -4  225.01   26.67
  -4  -4  -4  276.51   26.86
  -4   4  -5 1747.76  166.53
  -4  -4  -5 1928.55  163.39
  -4  -4  -5 2208.14  183.27
  -4   4  -5 1826.20  176.45
  -4  -4  -5 2020.89  162.72
  -4   4  -5 2101.29  173.75
  -4   4  -5 2116.14  167.22
  -4   4  -5 1980.95  170.52
  -4  -4  -5 1834.56  164.42
  -4   4  -5 1757.68  163.31
  -4  -4  -5 2001.18  162.64
  -4  -4  -5 2302.10  164.55
  -4  -4  -6  252.76   35.56
  -4  -4  -6  278.29   27.49
  -4   4  -6  224.10   30.94
  -4  -4  -6  276.93   28.40
  -4   4  -6  155.72   29.96
  -4  -4  -6  338.02   45.99
  -4   4  -6  275.77   41.26
  -4   4  -6  260.50   29.37
  -4  -4  -6  303.87   30.95
  -4   4  -6  280.98   28.82
  -4  -4  -6  247.72   26.81
  -4   4  -6  260.99   28.75
  -4   4  -6  197.07   30.99
  -4  -4  -7   36.92   11.75
  -4   4  -7   20.62   10.55
  -4  -4  -7   26.81    7.10
  -4  -4  -7   27.73   13.47
  -4   4  -7   24.24   13.05
  -4   4  -7   20.75    6.84
  -4  -4  -7   47.23   10.24
  -4   4  -7   21.30    7.56
  -4   4  -7   30.27    9.70
  -4  -4  -7   24.81    6.18
  -4  -4  -7   28.10    5.99
  -4  -4  -8   88.66   12.85
  -4  -4  -8  109.66   20.52
  -4  -4  -8  120.89   16.67
  -4   4  -8   84.13   15.09
  -4  -4  -8  131.24   27.05
  -4   4  -8   67.13   21.83
  -4   4  -8   91.61   16.57
  -4   4  -8   86.43   15.24
  -4   4  -8   78.38   17.65
  -4  -4  -8  102.67   13.82
  -4   4  -9 1261.08  105.36
  -4   4  -9  908.02  101.62
  -4  -4  -9 1123.78  102.18
  -4   4  -9 1134.89  101.47
  -4   4  -9 1463.44  110.20
  -4   4 -10   29.91    9.09
  -4   4 -10   24.74    6.31
  -4   4 -10   19.97    7.16
  -4  -4 -10   10.75    5.48
  -4   4 -10   12.77    5.96
  -4   4 -11   30.84    6.42
  -4   4 -11   40.28    7.97
  -4  -4 -11   45.85    7.68
  -4   4 -12    3.51    2.26
  -4  -4 -12   -0.41    2.82
   4  -5 -15    1.21    1.28
   4   5 -14    3.10    2.45
  -4  -5  14    1.16    2.22
  -4  -5  14    0.48    1.98
  -4  -5  13  438.15   38.31
  -4  -5  13  376.02   37.40
  -4   5  13  417.87   37.16
  -4  -5  13  403.96   38.44
   4   5 -13  401.93   37.17
   4   5 -12  102.51   14.01
  -4  -5  12   81.58   13.20
  -4  -5  12  110.56   14.85
  -4  -5  12  101.44   12.91
  -4  -5  12   96.82   17.18
  -4   5  12   68.02   12.22
   4   5 -12   71.50   10.63
  -4   5  11  155.20   20.93
  -4  -5  11  206.09   23.43
  -4  -5  11  181.37   20.65
  -4  -5  11  147.22   21.03
   4   5 -11  165.76   18.96
  -4   5  11  156.76   21.56
  -4  -5  10  225.82   26.07
  -4  -5  10  190.57   25.73
  -4  -5  10  234.67   24.92
  -4   5  10  173.31   24.75
  -4  -5  10  232.07   26.83
  -4   5  10  244.72   27.80
  -4  -5  10  210.02   22.32
   4   5 -10  226.73   23.45
  -4  -5  10  187.03   30.15
  -4   5  10  226.83   33.87
  -4   5  10  147.91   29.65
  -4  -5  10  222.72   34.47
  -4  -5   9   10.11    5.21
  -4  -5   9    2.45    4.51
  -4   5   9    5.48    4.13
  -4  -5   9   13.75    5.47
  -4  -5   9    4.62    4.92
  -4   5   9    1.58    3.37
  -4  -5   9    2.25    2.54
  -4  -5   9   11.89    7.73
  -4   5   9    5.82    5.36
  -4  -5   8  464.24   48.85
  -4  -5   8  406.94   51.39
  -4   5   8  456.80   48.01
  -4  -5   8  632.17   49.38
  -4  -5   8  478.78   43.75
  -4  -5   8  384.10   45.46
  -4   5   8  511.29   49.76
  -4   5   8  422.12   54.71
  -4  -5   8  485.38   55.78
  -4  -5   7    6.22    4.44
  -4   5   7    6.14    4.74
  -4  -5   7   14.51    5.20
  -4  -5   7   12.67    3.73
  -4  -5   7   11.68    5.40
  -4   5   7   10.51    5.55
  -4  -5   7    4.73    5.06
  -4   5   7   -2.56    3.89
  -4  -5   7    9.44    4.63
  -4  -5   6  786.17   73.04
  -4   5   6  591.44   65.88
  -4  -5   6  768.22   66.72
  -4  -5   6  718.06   66.44
  -4   5   6  627.93   68.15
  -4   5   6  704.73   74.11
  -4  -5   6  682.89   72.27
  -4  -5   5 1529.52  126.23
  -4  -5   5 1619.90  120.12
  -4   5   5 1045.51  118.31
  -4  -5   5 1492.94  126.10
  -4   5   5 1234.17  125.42
  -4   5   5 1462.67  121.20
  -4   5   5 1203.19  125.19
  -4   5   5 1483.31  120.20
  -4   5   4  614.33   57.92
  -4  -5   4  589.57   61.93
  -4   5   4  542.83   62.19
  -4   5   4  775.23   61.30
  -4  -5   4  737.01   66.69
  -4   5   4  617.23   58.57
  -4   5   4  639.23   66.60
  -4  -5   4  551.58   61.28
  -4  -5   3   35.48    8.78
  -4   5   3   49.90   12.99
  -4   5   3   22.51    5.33
  -4   5   3   53.71    8.97
  -4  -5   3   33.63    6.56
  -4  -5   3   35.36    8.99
  -4   5   3   36.56    9.40
  -4   5   3   32.98    6.73
  -4  -5   2  141.97   16.38
  -4  -5   2  150.61   20.42
  -4   5   2  114.99   16.20
  -4   5   2  113.76   23.38
  -4  -5   2  189.29   21.33
  -4  -5   1  555.47   46.37
  -4   5   1  408.44   45.74
  -4  -5   1  397.14   47.57
  -4  -5   1  443.67   41.48
  -4  -5   1  408.89   41.14
  -4  -5   0   92.66   13.12
  -4  -5   0   54.56   10.15
  -4   5   0   53.30   11.67
  -4  -5   0   79.14   15.31
  -4  -5   0   69.22    9.94
  -4  -5   0   41.26   12.53
  -4   5   0   51.13   12.14
  -4  -5   0   64.96    9.51
  -4   5  -1 1046.42   98.92
  -4  -5  -1  863.69   80.61
  -4  -5  -1  864.43   87.76
  -4   5  -1  748.57   83.76
  -4  -5  -1  870.17   79.34
  -4   5  -1  846.42   78.24
  -4  -5  -2   -3.17    8.90
  -4   5  -2    3.37    2.16
  -4  -5  -2    1.96    3.13
  -4  -5  -2    3.86    4.10
  -4   5  -2    3.43    8.13
  -4  -5  -2    1.54    2.18
  -4   5  -2    2.24    2.75
  -4   5  -2    8.98    7.13
  -4  -5  -2   11.12    7.47
  -4  -5  -3   14.51    4.73
  -4   5  -3   13.56    9.48
  -4  -5  -3   17.44    5.14
  -4   5  -3   13.25   10.59
  -4  -5  -3   12.36    9.15
  -4   5  -3    4.05    4.92
  -4  -5  -3   12.37    4.15
  -4   5  -3    8.51    4.07
  -4   5  -3   19.68    4.69
  -4  -5  -4   51.50   10.34
  -4  -5  -4   60.81   16.14
  -4   5  -4   44.51   13.20
  -4  -5  -4   19.03   13.52
  -4   5  -4   44.13   10.75
  -4  -5  -4   55.86    9.43
  -4  -5  -4   56.29    9.29
  -4  -5  -4   58.04    8.94
  -4   5  -4   60.58   10.20
  -4  -5  -4   63.33   10.03
  -4   5  -4   68.26   17.36
  -4   5  -4   63.63    9.31
  -4   5  -4   41.70    8.28
  -4   5  -4   62.07   12.40
  -4   5  -5  548.07   69.18
  -4  -5  -5  875.25   68.49
  -4  -5  -5  873.57   83.33
  -4   5  -5  664.44   76.82
  -4   5  -5  696.90   72.00
  -4   5  -5  571.92   73.23
  -4  -5  -5  782.85   67.25
  -4   5  -5  669.23   77.35
  -4   5  -5  753.40   71.76
  -4  -5  -5 1080.42   71.26
  -4   5  -5  705.31   67.10
  -4  -5  -5  566.40   67.56
  -4  -5  -5  749.64   66.76
  -4  -5  -6    2.67    4.01
  -4  -5  -6   -3.25    5.98
  -4   5  -6    6.16    8.01
  -4   5  -6   -2.34   12.68
  -4  -5  -6    2.75    3.23
  -4   5  -6    6.20    6.94
  -4   5  -6   -1.64    3.89
  -4   5  -6   -1.84    4.78
  -4  -5  -6    4.57    3.21
  -4   5  -6    1.10    3.68
  -4  -5  -6    4.57    4.85
  -4   5  -6   -1.26    3.00
  -4   5  -7    6.36    8.12
  -4  -5  -7    8.07    5.22
  -4   5  -7    1.18    3.79
  -4  -5  -7   10.66    4.03
  -4   5  -7    4.33    7.64
  -4   5  -7    9.17    5.86
  -4   5  -7   13.93    5.40
  -4  -5  -7    2.54    4.07
  -4  -5  -7    6.60    9.28
  -4   5  -7   10.02   10.64
  -4   5  -8  256.54   28.77
  -4   5  -8  253.86   31.67
  -4   5  -8  136.01   23.46
  -4  -5  -8  223.58   25.47
  -4   5  -8  250.42   25.27
  -4  -5  -8  257.69   24.56
  -4   5  -8  219.75   28.85
  -4   5  -8  260.50   27.25
  -4   5  -9  180.23   24.22
  -4   5  -9  157.63   20.95
  -4   5  -9  152.39   18.50
  -4   5  -9  158.51   21.80
  -4  -5  -9  218.03   20.87
  -4   5  -9  113.64   18.33
  -4   5 -10   17.66    4.64
  -4   5 -10   13.59    6.70
  -4  -5 -10   11.08    4.44
  -4   5 -10   18.61    6.51
  -4   5 -10    9.11    4.78
  -4   5 -11    7.61    4.85
  -4   5 -11    7.64    3.04
  -4  -5 -11    0.49    4.19
  -4   5 -12  150.19   16.42
   4  -5  12  161.24   15.24
  -4   5 -12  144.65   15.39
  -4  -6  14    5.73    2.79
   4   6 -14   14.73    3.47
  -4  -6  14   12.51    3.58
   4  -6 -14   14.58    3.18
  -4  -6  13  176.00   18.69
   4   6 -13  137.43   15.78
  -4  -6  13  148.18   18.74
   4   6 -13  199.72   18.94
  -4   6  12  170.99   18.39
  -4  -6  12  175.31   18.37
  -4  -6  12  182.50   20.32
   4   6 -12  191.05   18.01
   4   6 -12  208.15   20.88
  -4  -6  11   26.44    6.77
  -4  -6  11   18.28    6.70
  -4  -6  11   14.90    4.38
  -4   6  11   28.28    6.83
   4   6 -11   19.64    5.67
  -4  -6  11   20.45    5.80
  -4  -6  10  234.06   28.32
  -4  -6  10  255.98   26.82
  -4  -6  10  219.16   24.10
  -4  -6  10  218.37   26.09
   4   6 -10  250.18   25.57
  -4   6  10  232.00   27.25
  -4  -6   9  839.66   84.22
  -4  -6   9  897.10   76.10
  -4   6   9  960.48   78.60
  -4  -6   9  916.60   73.81
  -4  -6   9  872.85   79.05
  -4   6   8   66.83   15.36
  -4  -6   8   91.16   17.76
  -4   6   8   46.34   10.74
  -4  -6   8   66.05   11.70
  -4   6   8   96.32   14.65
  -4  -6   8   78.69   14.18
  -4  -6   8  115.94   14.50
  -4  -6   8   80.19   10.96
  -4   6   7   25.98    8.99
  -4   6   7   15.40    6.26
  -4  -6   7   17.22    6.57
  -4  -6   7   24.00    9.06
  -4   6   7    9.41    4.63
  -4  -6   7   15.94    5.21
  -4   6   7   19.29    7.14
  -4  -6   7   16.15    4.33
  -4   6   6   39.36    9.36
  -4  -6   6   60.74   12.95
  -4  -6   6   49.26   11.27
  -4   6   6   35.69   10.19
  -4   6   6   32.59    9.35
  -4   6   6   36.87    8.24
  -4  -6   6   33.68    7.57
  -4   6   6   47.31   10.07
  -4  -6   6   41.31    6.95
  -4   6   5  220.58   26.62
  -4   6   5  281.53   29.90
  -4   6   5  278.49   28.52
  -4   6   5  199.59   31.16
  -4  -6   5  278.09   32.75
  -4  -6   5  252.88   30.82
  -4   6   5  256.11   31.67
  -4  -6   5  247.33   26.66
   4   6  -5  271.68   29.38
  -4   6   5  226.76   29.30
  -4   6   4  467.90   57.02
  -4  -6   4  500.88   53.78
  -4  -6   4  583.64   53.71
  -4   6   4  479.45   52.82
  -4   6   4  519.80   49.22
  -4  -6   4  582.13   48.78
  -4   6   4  596.80   51.85
  -4   6   4  437.64   51.46
  -4   6   4  443.90   48.35
  -4   6   3  368.85   47.37
  -4   6   3  425.56   38.43
  -4   6   3  379.61   36.75
  -4  -6   3  529.82   44.76
  -4   6   3  259.98   34.83
  -4  -6   3  428.21   36.56
  -4   6   3  346.94   35.11
  -4  -6   3  355.44   40.85
  -4   6   2  114.48   15.32
  -4   6   2  113.23   14.77
  -4  -6   2  131.24   18.35
  -4   6   2  103.34   13.49
  -4  -6   2  114.88   14.21
  -4  -6   2  122.05   19.03
  -4   6   2   84.61   21.63
  -4  -6   1  768.14   61.21
  -4   6   1  647.13   60.93
  -4   6   1  509.28   74.03
  -4   6   1  565.56   64.33
  -4  -6   1  763.43   69.48
  -4  -6   1  653.06   60.56
  -4   6   1  596.30   59.40
  -4   6   1  606.48   60.72
  -4   6   0 1129.68  117.86
  -4  -6   0 1239.86  120.74
  -4   6   0 1211.84  113.52
  -4  -6   0 1332.95  114.46
  -4  -6  -1  325.91   34.29
  -4  -6  -1  458.17   38.65
  -4   6  -1  262.64   36.20
  -4  -6  -1  317.32   39.29
  -4  -6  -1  334.03   35.42
  -4  -6  -1  379.86   42.48
  -4   6  -1  278.81   37.20
  -4   6  -1  318.86   35.78
  -4  -6  -1  419.75   34.70
  -4  -6  -1  379.67   49.08
  -4   6  -1  324.60   32.92
  -4   6  -1  339.49   32.96
  -4   6  -2  200.59   22.77
  -4  -6  -2  104.51   14.08
  -4   6  -2  114.40   16.11
  -4   6  -2   95.05   13.70
  -4  -6  -2   91.03   23.82
  -4  -6  -2   13.20   10.21
  -4   6  -2   95.83   17.03
  -4  -6  -2  100.01   13.76
  -4   6  -2   91.03   12.66
  -4  -6  -2  118.67   14.45
  -4   6  -2  107.94   17.24
  -4  -6  -2   77.33   16.60
  -4  -6  -2   87.73   11.86
  -4   6  -2  102.81   12.22
  -4  -6  -3  753.70   69.87
  -4  -6  -3  799.47   79.96
  -4   6  -3  700.07   76.41
  -4  -6  -3  867.45   72.17
  -4   6  -3  608.14   73.65
  -4   6  -3  803.23   70.70
  -4  -6  -3  722.70   71.82
  -4   6  -3  803.24   78.64
  -4  -6  -3  831.98   69.98
  -4   6  -3  798.08   69.92
  -4  -6  -4  522.64   51.18
  -4   6  -4  495.43   57.90
  -4  -6  -4  535.83   54.01
  -4   6  -4  488.32   59.43
  -4  -6  -4  603.79   52.81
  -4   6  -4  575.32   69.73
  -4   6  -4  542.71   57.38
  -4  -6  -4  403.40   66.44
  -4  -6  -4  575.71   50.87
  -4   6  -4  589.25   54.22
  -4  -6  -5  182.48   20.31
  -4   6  -5   98.54   22.45
  -4  -6  -5  186.16   20.01
  -4  -6  -5  160.72   19.65
  -4   6  -5  173.40   30.71
  -4   6  -5  197.03   23.98
  -4  -6  -5  145.08   32.53
  -4  -6  -5  146.86   21.27
  -4   6  -5  200.51   26.09
  -4   6  -6   10.64    7.06
  -4   6  -6    3.57    6.00
  -4   6  -6    9.02    7.43
  -4   6  -6    2.55    9.77
  -4  -6  -6   11.01    4.38
  -4  -6  -6    2.69    3.32
  -4   6  -6    2.90    5.34
  -4   6  -6    4.03    3.80
  -4  -6  -6    9.48    5.58
  -4   6  -6    2.73    3.64
  -4   6  -6    6.78    3.73
  -4   6  -7   28.04    8.89
  -4   6  -7   20.39    8.96
  -4  -6  -7   24.29    5.81
  -4   6  -7   18.52    8.56
  -4   6  -7   21.64    5.97
  -4   6  -7   19.57    6.58
  -4   6  -7   17.96    5.58
  -4  -6  -7   17.59    6.62
  -4   6  -7   25.14   11.24
  -4   6  -8   29.59   10.44
  -4   6  -8   24.80    6.16
  -4  -6  -8   15.53    4.45
  -4   6  -8   29.10    7.49
  -4   6  -8   15.84    7.35
  -4  -6  -8   27.51    6.20
  -4   6  -9  270.14   31.57
  -4   6  -9  326.91   34.38
  -4   6  -9  302.37   29.51
  -4   6  -9  298.76   32.26
  -4  -6  -9  258.85   27.95
  -4   6 -10   45.95    8.59
  -4   6 -10   69.37   11.36
  -4   6 -10   47.09    8.08
  -4   6 -11   61.41    9.35
  -4   6 -11   49.54    7.76
   4  -6  11   60.47    7.78
   4  -6  11   80.83   11.01
  -4   6 -12    0.32    1.34
   4  -6  12    2.63    2.03
  -4   6 -12    1.16    1.78
  -4  -7  14   73.55    9.56
   4   7 -14  100.33    9.90
   4  -7 -14   90.94    8.92
   4   7 -13    6.06    2.39
   4  -7 -13    8.54    2.85
   4   7 -13   10.51    3.93
  -4  -7  13    7.49    4.09
  -4  -7  13    7.55    3.08
   4   7 -12   27.23    7.16
  -4  -7  12   23.43    5.10
   4   7 -12   28.01    5.45
   4   7 -11    1.62    3.10
  -4  -7  11    4.38    3.09
  -4  -7  11    4.71    2.68
  -4  -7  11   -1.44    4.05
  -4  -7  11    4.73    4.16
  -4  -7  10  187.04   24.58
  -4  -7  10  227.70   23.74
  -4  -7  10  183.42   21.16
   4   7 -10  214.10   22.75
  -4  -7   9   93.84   15.64
   4   7  -9   88.06   12.22
  -4  -7   9   89.94   12.27
  -4  -7   8  526.68   58.13
  -4  -7   8  549.59   48.82
  -4  -7   8  461.63   52.48
  -4  -7   7  177.59   26.82
  -4  -7   7  187.11   19.76
  -4   7   7  144.03   21.66
  -4  -7   6   13.93    4.18
  -4   7   6   14.68    8.17
  -4  -7   6   12.14    4.82
  -4  -7   6   17.28    7.69
  -4  -7   5 1340.37   99.28
  -4   7   5 1101.99   99.06
  -4   7   5  836.40  103.33
  -4  -7   5 1189.77  105.78
   4   7  -5 1090.31  101.44
  -4  -7   5  996.69   95.88
  -4  -7   5 1293.63   98.46
  -4   7   5  926.67  101.00
  -4   7   4 1222.39  103.12
  -4  -7   4 1629.98  114.32
  -4   7   4 1116.62  102.76
  -4   7   4  880.97  109.89
  -4  -7   4 1188.22  109.36
  -4   7   4  981.09  101.89
  -4  -7   4 1316.49  103.62
  -4   7   4  879.81  105.47
  -4  -7   4 1325.49  102.62
  -4   7   3  301.80   29.38
  -4   7   3  236.66   26.24
  -4   7   3  239.20   28.12
  -4   7   3  260.26   38.31
  -4  -7   3  244.54   25.57
  -4   7   3  227.72   25.08
  -4  -7   3  238.56   31.39
  -4   7   3  223.50   30.88
  -4   7   3  257.71   30.43
  -4   7   3  211.51   26.00
  -4   7   3  206.27   25.28
  -4  -7   3  325.89   33.50
  -4  -7   2  233.87   25.14
  -4  -7   2  171.99   19.15
  -4   7   2  158.68   18.31
  -4   7   2  132.74   29.48
  -4   7   2  165.60   23.51
  -4   7   2  154.29   19.36
  -4   7   2  187.14   20.95
  -4   7   2  140.68   19.22
  -4  -7   2  146.54   18.41
  -4   7   1  986.54   89.38
  -4   7   1  989.57   89.25
  -4  -7   1  908.71   88.21
  -4   7   1  943.14   87.75
  -4  -7   1 1056.74   88.57
  -4   7   1 1026.14   89.93
  -4  -7   1 1002.08   89.80
  -4   7   1  922.52   89.33
  -4  -7   1 1315.80   94.94
  -4   7   1 1003.96   93.90
  -4   7   0   -0.91    4.52
  -4   7   0   12.02    5.56
  -4  -7   0    2.05    3.45
  -4   7   0   -1.02    2.41
  -4  -7   0    0.81    2.27
  -4   7   0   -0.79    3.12
  -4   7   0    1.45    6.34
  -4   7   0    3.25    6.22
  -4   7   0   10.55    6.40
  -4  -7   0   -1.02    3.26
  -4  -7   0    1.36    3.23
  -4   7  -1  147.35   21.57
  -4   7  -1  147.56   20.39
  -4  -7  -1  148.21   18.17
  -4  -7  -1  117.75   17.45
  -4  -7  -1  169.19   31.77
  -4  -7  -1  122.93   17.16
  -4  -7  -1  183.61   20.90
  -4  -7  -1  127.51   18.66
  -4  -7  -1  158.41   17.32
  -4   7  -1  147.90   18.10
  -4   7  -1  126.31   16.24
  -4   7  -1  113.94   15.81
  -4  -7  -2    7.13    4.77
  -4  -7  -2   -4.32   16.53
  -4   7  -2   13.23   15.06
  -4  -7  -2   13.58    4.30
  -4  -7  -2    2.69    4.58
  -4  -7  -2   15.60    5.60
  -4   7  -2    8.31    6.15
  -4   7  -2   16.64    7.53
  -4   7  -2    6.80    5.42
  -4  -7  -2   14.95    5.36
  -4   7  -2    9.49    4.40
  -4  -7  -2   11.73    4.23
  -4   7  -2    6.68    3.39
  -4   7  -2   12.99    4.37
  -4   7  -3    6.19    7.59
  -4  -7  -3    9.07    4.98
  -4   7  -3    5.97    5.99
  -4   7  -3    1.90    5.71
  -4  -7  -3    4.37    4.20
  -4  -7  -3    4.71   11.19
  -4  -7  -3    2.50    2.82
  -4  -7  -3    3.22    2.98
  -4  -7  -3   10.22    5.26
  -4   7  -4  879.46   77.01
  -4  -7  -4  728.79   67.53
  -4  -7  -4  722.95   64.09
  -4  -7  -4  734.66   63.43
  -4  -7  -4  763.64   65.74
  -4   7  -4  733.37   87.37
  -4   7  -5  185.91   23.92
  -4  -7  -5  205.87   40.27
  -4   7  -5  251.23   34.33
  -4  -7  -5  229.56   23.87
  -4   7  -5  257.63   39.77
  -4   7  -5  214.59   23.49
  -4  -7  -5  190.85   22.64
  -4  -7  -5  189.35   24.97
  -4   7  -5  196.49   28.72
  -4  -7  -6   18.38    6.84
  -4   7  -6    2.78    4.45
  -4  -7  -6    7.12    3.43
  -4   7  -6   -3.27    6.03
  -4   7  -6    8.44    4.74
  -4  -7  -6   11.10    4.08
  -4   7  -6    4.00    3.54
  -4   7  -6    1.90    6.69
  -4   7  -6   12.26    6.10
  -4   7  -7  113.34   18.69
  -4  -7  -7  111.20   13.79
  -4   7  -7  104.17   16.30
  -4   7  -7  113.74   15.09
  -4   7  -7  103.42   17.91
  -4  -7  -7  114.74   16.13
  -4  -7  -8  233.48   22.74
  -4   7  -8  227.73   24.47
   4  -7   8  193.46   22.99
  -4   7  -8  247.29   26.31
  -4   7  -8  220.27   26.85
   4  -7   8  221.28   22.96
  -4   7  -9   34.37    8.13
  -4   7  -9   23.35    5.49
   4  -7   9   20.42    4.82
  -4   7 -10  192.84   19.49
  -4   7 -10  152.17   19.07
  -4  -7 -10  166.45   18.35
   4  -7  10  215.68   18.89
  -4   7 -11   17.59    3.76
   4  -7  11   16.10    3.10
  -4  -7 -11   15.54    2.97
   4  -8 -13   62.92    6.95
   4   8 -13   74.45    7.49
  -4  -8  13   63.75    9.12
   4   8 -13   88.05    9.12
  -4  -8  12    3.08    2.55
   4   8 -12    4.01    2.45
   4  -8 -12    4.23    2.61
   4  -8 -11   43.20    7.12
  -4  -8  11   45.17    7.49
   4   8 -11   47.85    8.01
  -4  -8  11   29.92    8.44
  -4  -8  11   42.77    7.72
   4   8 -10  104.16   13.21
  -4  -8  10   82.53   12.45
  -4  -8  10   72.17   15.41
  -4  -8  10   91.68   11.83
   4   8 -10   88.89   11.40
   4   8  -9  241.39   23.55
  -4  -8   9  209.37   22.62
  -4   8   9  189.13   22.72
  -4  -8   8   15.99    5.13
  -4   8   8   14.52    5.29
  -4  -8   7   16.28    7.41
  -4   8   7    4.14    4.13
  -4  -8   7    1.71    3.54
  -4  -8   7   11.01    4.27
  -4   8   7    2.56    5.93
  -4  -8   6  372.05   43.14
  -4  -8   6  330.13   34.34
  -4   8   6  382.56   36.72
  -4   8   6  301.50   35.24
  -4   8   6  290.12   38.31
  -4  -8   6  441.19   36.61
  -4   8   5   -8.95   14.21
  -4  -8   5    1.00    2.60
  -4   8   5   -1.14    3.63
  -4  -8   5   -2.18    4.01
  -4   8   5    2.24    4.75
   4   8  -5   -1.78    1.89
  -4   8   5    2.17    4.15
  -4  -8   5   -2.16    6.49
  -4  -8   5    2.83    2.84
  -4  -8   5    0.84    2.17
  -4  -8   4  198.95   22.63
  -4  -8   4  221.35   29.70
  -4   8   4  173.18   30.94
  -4  -8   4  187.51   21.92
  -4  -8   4  217.53   23.77
  -4   8   4  151.24   27.31
  -4   8   4  254.53   25.10
  -4   8   4  171.52   22.94
  -4  -8   3  119.36   15.42
  -4   8   3  126.20   17.16
  -4  -8   3  186.51   22.93
  -4  -8   3  123.97   16.27
  -4   8   3  129.28   16.16
  -4   8   3  168.47   18.27
  -4   8   3  126.66   17.07
  -4  -8   3  119.59   20.92
  -4   8   3   82.83   22.88
  -4   8   2   11.88   10.52
  -4   8   2   22.04   11.45
  -4   8   2   18.58    7.59
  -4  -8   2   23.04    6.02
  -4  -8   2   36.43    9.15
  -4  -8   2   34.90    6.80
  -4   8   2   26.07    5.94
  -4   8   2   24.19    6.75
  -4   8   2   31.23    6.97
  -4   8   1  377.42   35.62
  -4   8   1  357.90   34.00
  -4  -8   1  392.93   34.25
  -4   8   1  306.70   34.95
  -4   8   1  203.84   35.19
  -4   8   1  270.95   38.56
  -4  -8   1  491.38   40.58
  -4   8   1  349.93   35.73
  -4   8   0  983.34   90.79
  -4   8   0  991.44   92.72
  -4  -8   0 1024.88   92.77
  -4   8   0 1121.45   94.43
  -4  -8   0 1193.86   93.50
  -4   8   0  767.04   94.78
  -4   8   0 1013.63   96.62
  -4  -8   0 1307.63   96.80
  -4  -8   0  958.02   90.33
  -4  -8  -1  344.03   34.86
  -4   8  -1  258.13   36.63
  -4   8  -1  302.59   35.87
  -4  -8  -1  337.64   33.89
  -4  -8  -1  240.81   31.78
  -4  -8  -1  399.18   36.69
  -4  -8  -1  369.04   36.10
  -4   8  -1  277.86   32.88
  -4   8  -1  471.88   40.24
  -4   8  -1  314.55   31.96
  -4  -8  -1  341.66   50.56
  -4  -8  -2   58.97   11.85
  -4   8  -2   51.58   12.84
  -4  -8  -2   84.44   12.52
  -4   8  -2   60.69   14.29
  -4   8  -2   69.77   13.31
  -4  -8  -2   77.85   24.51
  -4  -8  -2   91.03   13.61
  -4   8  -2   69.47   10.79
  -4  -8  -2   84.84   11.41
  -4  -8  -2   58.33   13.07
  -4   8  -3  555.61   48.49
  -4   8  -3  243.96   39.81
  -4  -8  -3  383.49   38.67
  -4   8  -3  435.17   44.52
  -4   8  -3  384.57   39.24
  -4  -8  -3  389.59   36.82
  -4   8  -3  394.55   37.85
  -4  -8  -3  395.48   59.23
  -4  -8  -3  403.97   39.40
  -4  -8  -3  330.53   39.25
  -4  -8  -4   41.77    8.83
  -4   8  -4   32.52   11.44
  -4   8  -4   42.49    8.57
  -4   8  -4   54.56   15.31
  -4  -8  -4   48.46    9.44
  -4  -8  -4   46.82   10.26
  -4  -8  -4   55.19    8.18
  -4  -8  -5   70.82   13.12
  -4   8  -5   90.47   18.64
  -4  -8  -5   88.26   12.18
  -4   8  -5   87.11   23.48
  -4   8  -5   81.68   12.20
  -4  -8  -5   64.54   22.21
  -4   8  -5   73.46   13.55
  -4  -8  -5   82.57   12.32
  -4  -8  -5   69.60   10.86
  -4   8  -5   48.07   13.53
  -4  -8  -6  356.94   32.77
  -4  -8  -6  352.56   33.86
  -4   8  -6  288.25   34.84
  -4   8  -6  290.13   32.72
   4  -8   6  286.60   30.76
  -4  -8  -6  351.64   35.41
  -4  -8  -6  323.63   32.00
  -4   8  -6  327.16   38.91
  -4   8  -6  457.38   45.34
  -4   8  -7  156.66   23.38
  -4   8  -7  165.91   21.72
  -4  -8  -7  176.74   19.97
  -4   8  -7  179.45   20.27
   4  -8   7  152.53   18.04
  -4  -8  -7  172.44   18.66
  -4  -8  -7  215.00   22.28
  -4   8  -8  132.97   18.73
  -4  -8  -8  152.92   17.46
  -4   8  -8  160.15   18.21
   4  -8   8  166.92   16.87
  -4   8  -8  169.07   21.70
   4  -8   8  141.58   17.37
   4  -8   9    8.47    2.79
  -4  -8  -9    3.87    2.54
  -4   8  -9    7.12    3.16
   4  -8   9    4.59    5.19
  -4   8 -10   13.08    4.25
  -4  -8 -10    4.14    1.86
   4  -8  10    5.01    2.04
   4  -8  10   10.08    4.40
  -4   8 -10    8.93    3.12
  -4   8 -11   78.91    8.71
  -4  -9  13   11.47    3.11
   4   9 -12   10.37    3.12
   4  -9 -12   10.24    2.26
  -4  -9  12    4.85    2.08
   4   9 -12   11.89    3.85
  -4  -9  11   57.03   11.53
   4   9 -11  116.54   12.25
  -4  -9  11   64.93    9.83
   4  -9 -11   90.07   10.08
  -4  -9  11   99.93   11.26
   4   9 -11  121.26   13.52
   4   9 -10  926.47   70.81
   4  -9 -10  776.81   67.95
   4   9 -10  698.00   67.98
  -4  -9  10  745.76   73.96
  -4  -9  10  753.59   69.45
  -4  -9  10  792.42   69.44
   4  -9  -9   31.59    6.15
  -4  -9   9   50.91    8.27
   4   9  -9   41.44    8.17
   4   9  -9   33.55    6.93
  -4  -9   9   34.68    6.76
  -4  -9   9   37.54   10.97
   4   9  -8   58.31    9.81
  -4  -9   8   46.52    8.80
  -4  -9   8   75.59   15.96
  -4  -9   8   60.02    9.80
  -4  -9   7   62.82    9.92
  -4   9   7   42.83   10.97
  -4  -9   7   51.57    9.06
  -4  -9   6   52.78   13.38
  -4  -9   6   41.44    8.26
  -4   9   6   50.56    9.39
  -4   9   6   65.63   10.92
  -4  -9   6   52.99    9.35
  -4   9   6   54.84   13.15
  -4  -9   6   76.48   15.89
  -4  -9   5  361.79   37.63
  -4  -9   5  365.61   30.49
  -4  -9   5  342.83   38.77
   4   9  -5  301.19   35.41
  -4   9   5  236.49   28.69
  -4   9   5  252.32   29.26
  -4  -9   5  216.46   27.63
  -4   9   5  276.40   34.51
  -4   9   4   61.68   10.90
  -4  -9   4   94.40   17.34
  -4   9   4   51.44   14.94
  -4  -9   4   68.80   10.79
  -4  -9   4   76.76   11.70
  -4   9   4   64.35   11.23
  -4  -9   4   65.20   10.72
  -4  -9   4   97.58   16.66
  -4   9   4   86.34   18.86
  -4  -9   3   60.76   12.85
  -4   9   3   40.23    8.69
  -4   9   3   49.69   16.92
  -4  -9   3   49.67    8.42
  -4   9   3   63.24   10.43
  -4  -9   3   34.11    7.67
  -4  -9   3   45.40    8.77
  -4   9   2   13.26   10.49
  -4   9   2   11.08    5.07
  -4   9   2    3.01    3.20
  -4   9   2   11.97   10.38
  -4  -9   2    8.33    3.43
  -4  -9   2   -0.89    2.51
  -4  -9   2    4.67    4.68
  -4   9   2    3.25    3.45
  -4   9   2    2.12   10.81
  -4   9   2    2.92    4.39
  -4  -9   1   29.03    6.42
  -4   9   1   16.06   12.80
  -4   9   1   21.18    8.93
  -4   9   1   60.91   10.56
  -4   9   1   44.88    8.78
  -4  -9   1   45.13   10.14
  -4   9   0  157.10   27.29
  -4   9   0  186.43   28.58
  -4   9   0  222.29   25.39
  -4  -9   0  265.40   28.16
  -4  -9  -1   46.89    9.03
  -4   9  -1   58.48   13.83
  -4   9  -1   24.50   10.75
  -4  -9  -1   48.21    9.38
  -4  -9  -1   57.37   19.88
  -4  -9  -1   70.14   11.83
  -4  -9  -1   59.92   11.39
  -4  -9  -2   41.26    8.83
  -4   9  -2   22.27    7.50
  -4   9  -2   20.09    9.27
  -4   9  -2   21.52    8.68
  -4  -9  -2   33.46    8.44
  -4  -9  -2   39.03    7.94
  -4  -9  -2   31.46   15.21
  -4  -9  -2    7.85    5.58
  -4  -9  -2   29.05    6.21
  -4   9  -3   -1.73    4.87
  -4  -9  -3    6.50    5.34
  -4  -9  -3   -1.03    3.28
  -4  -9  -3   -4.67   12.13
  -4  -9  -3    1.14    3.42
  -4  -9  -3    2.93    2.58
  -4   9  -3   -1.90    5.71
  -4   9  -3   -4.47    6.38
  -4  -9  -4  677.34   63.55
  -4   9  -4  648.26   86.80
  -4   9  -4  690.23   69.19
  -4  -9  -4  803.33   88.81
  -4  -9  -4  637.69   63.07
  -4  -9  -4  743.76   66.07
  -4  -9  -5   -1.21    3.39
  -4  -9  -5    2.36    2.50
  -4   9  -5   -1.80    5.41
  -4  -9  -5    4.41    3.24
  -4  -9  -5   -0.93    2.79
  -4   9  -5    1.53    5.14
  -4   9  -6  136.73   20.23
  -4  -9  -6  119.80   14.78
  -4  -9  -6  130.86   14.76
  -4  -9  -6  120.01   15.39
  -4   9  -6  114.37   17.67
  -4  -9  -6  132.44   17.19
  -4   9  -7    2.82    4.74
  -4  -9  -7    1.82    3.21
  -4   9  -7    4.76    4.00
  -4  -9  -7    2.10    2.68
  -4  -9  -7    0.52    1.74
   4  -9   8   20.10    5.16
   4  -9   8   40.25    8.57
  -4  -9  -8   25.25    4.94
  -4   9  -8   22.30    6.53
   4  -9   8   26.35    4.63
  -4   9  -8   31.74    7.99
   4  -9   9   21.00    6.00
  -4   9  -9   28.50    6.60
   4  -9  10  523.32   55.38
  -4   9 -10  658.65   54.98
  -4   9 -10  686.23   55.03
   4  10 -12   14.10    3.03
   4  10 -12   18.34    3.24
  -4 -10  12    9.64    2.53
   4  10 -11    0.59    1.99
   4  10 -11   -1.09    2.32
  -4 -10  11    0.36    1.46
  -4 -10  11    2.41    2.95
   4  10 -10   22.75    4.67
  -4 -10  10   18.47    4.22
   4  10 -10   23.47    5.78
   4  10 -10   23.79    5.59
  -4 -10  10   21.67    4.64
  -4 -10  10   21.38    6.55
   4  10  -9  108.84   14.19
  -4 -10   9  108.27   13.24
  -4 -10   9  105.09   17.09
   4  10  -9  111.32   13.58
  -4 -10   8   22.38    5.36
   4  10  -8   16.69    5.49
  -4 -10   8   26.06    5.63
  -4 -10   7    7.30    6.71
  -4 -10   7    3.38    3.48
  -4 -10   7    1.67    2.18
  -4  10   7    3.25    5.64
  -4 -10   6  436.14   43.79
  -4  10   6  454.26   44.66
  -4 -10   6  404.18   43.22
  -4  10   6  492.69   48.11
  -4 -10   5   19.49    7.33
  -4 -10   5    5.58    3.38
  -4  10   5    8.61    4.50
  -4 -10   5   16.21    5.04
  -4  10   5   16.55    9.16
  -4  10   4  186.46   25.46
  -4 -10   4  176.10   22.92
  -4 -10   4  143.09   17.85
  -4  10   4  136.78   19.29
  -4 -10   4  135.73   17.53
   4  10  -4  146.26   23.23
  -4 -10   4  138.02   17.13
  -4 -10   3   17.27    7.43
  -4 -10   3   18.57    5.02
  -4  10   3   15.55   10.02
  -4 -10   3   14.08    5.13
  -4 -10   3   17.99    5.36
  -4 -10   2  170.70   21.47
  -4  10   2  137.74   17.60
  -4 -10   2  125.60   16.16
  -4  10   2  127.76   28.12
  -4  10   2  123.44   23.43
  -4  10   2  140.51   19.59
  -4 -10   2  113.39   16.70
  -4  10   1    5.50    3.69
  -4  10   1   -0.96    2.88
  -4 -10   1    1.39    3.60
  -4  10   1    1.97   12.19
  -4  10   1    3.31    4.96
  -4  10   1   -4.44   11.54
  -4 -10   0  400.20   35.00
  -4  10   0  364.84   33.02
  -4  10   0  326.02   36.83
  -4  10   0  363.04   38.21
  -4 -10  -1    3.87    3.63
  -4  10  -1    8.68    5.43
  -4  10  -1    1.15    2.99
  -4 -10  -1    2.53    3.56
  -4  10  -1    1.96    6.57
  -4  10  -1   -7.84   12.11
  -4 -10  -2  400.65   33.63
  -4  10  -2  476.42   43.76
  -4  10  -2  414.65   38.70
  -4 -10  -2  485.04   38.30
  -4 -10  -3    1.83    3.38
  -4  10  -3    3.20    5.43
  -4 -10  -3    2.11    3.17
  -4 -10  -3    2.55    2.35
  -4 -10  -3    7.33    5.02
  -4 -10  -4   86.99   11.84
  -4 -10  -4   62.88   10.35
  -4  10  -4   72.04   14.10
  -4 -10  -4   80.33   11.71
   4 -10   4   88.25   13.12
  -4 -10  -4   78.96   13.02
  -4  10  -5  125.04   18.03
  -4 -10  -5  102.50   12.69
  -4 -10  -5   90.89   12.74
   4 -10   5  116.64   16.29
  -4 -10  -5   94.02   12.93
  -4  10  -5  114.85   17.22
  -4 -10  -5  114.35   15.43
  -4  10  -6  859.37   74.00
  -4  10  -6  852.11   73.35
  -4 -10  -6  725.77   67.53
  -4 -10  -6  806.07   70.70
   4 -10   6  825.39   72.26
  -4 -10  -6  727.58   67.86
  -4 -10  -7    6.65    3.45
   4 -10   7    4.97    4.11
  -4  10  -7    6.52    4.78
  -4  10  -7    7.20    5.03
   4 -10   8  319.22   33.11
  -4  10  -8  403.98   34.80
   4 -10   8  303.42   31.41
  -4  10  -8  358.01   33.45
   4 -10   9  148.47   16.90
  -4  10  -9  173.77   17.50
  -4  11  11    0.89    1.17
  -4 -11  11   -0.49    1.47
   4  11 -11    1.13    1.49
  -4 -11  11    0.48    1.97
  -4 -11  10  414.55   41.85
  -4 -11  10  353.27   43.55
   4  11 -10  532.27   42.16
   4  11 -10  614.91   44.12
  -4 -11   9   26.85    5.48
  -4 -11   9   30.68    5.60
   4  11  -9   30.07    6.18
   4  11  -9   44.90    6.70
  -4 -11   8   20.87    4.73
  -4 -11   8   10.62    5.83
   4  11  -8   19.01    5.32
  -4 -11   8   19.10    4.43
  -4  11   7   20.28    6.87
  -4 -11   7   14.04    4.14
   4  11  -7   20.57    5.76
  -4 -11   7    9.90    3.66
  -4 -11   6  103.83   15.60
  -4 -11   6   69.48   10.34
  -4  11   6   84.32   14.13
  -4 -11   6   76.02   11.15
  -4  11   5  936.73   74.72
  -4 -11   5  696.48   67.40
  -4  11   5  753.76   69.51
  -4 -11   5  660.65   68.15
  -4 -11   5 1018.54   75.93
  -4 -11   4   47.56    8.05
  -4 -11   4   58.10   11.53
  -4 -11   4   52.78    9.17
  -4  11   4   56.86    9.77
  -4 -11   3   25.06    7.47
  -4  11   3   12.42    4.67
  -4 -11   3   11.11    4.43
  -4 -11   2   72.43   11.83
  -4  11   2   49.03   13.69
  -4 -11   2   43.52    8.28
  -4 -11   2   32.50    7.60
  -4  11   1  237.10   25.81
  -4  11   1  217.06   28.02
  -4 -11   1  200.69   23.41
  -4 -11   1  163.14   20.61
  -4  11   1  170.98   22.23
  -4  11   1  172.79   20.78
  -4  11   0   72.01   12.17
  -4 -11   0   60.38   11.84
  -4 -11   0   47.77    9.39
  -4  11   0   74.61   15.64
  -4  11   0   82.79   14.53
  -4  11   0   77.05   11.21
  -4 -11   0   71.43   12.10
  -4  11   0   84.37   12.23
  -4  11  -1  218.43   25.95
  -4 -11  -1  223.60   25.89
  -4  11  -1  271.81   30.84
  -4  11  -1  267.99   29.73
  -4 -11  -1  219.42   25.49
  -4  11  -1  264.14   26.58
  -4  11  -1  227.39   24.61
  -4 -11  -1  194.81   22.95
  -4  11  -2   65.93   14.53
  -4  11  -2  118.67   14.64
  -4  11  -2   99.66   13.02
  -4 -11  -2   84.13   10.94
  -4 -11  -2   74.42   12.27
  -4 -11  -3    6.33    3.59
  -4  11  -3   -0.92    7.01
  -4  11  -3    1.78    2.51
  -4 -11  -4  326.95   31.58
  -4 -11  -4  402.90   34.48
  -4  11  -4  390.38   33.04
   4 -11   5  307.22   33.50
  -4  11  -5  307.77   35.64
  -4 -11  -5  358.18   32.58
  -4 -11  -5  371.08   34.69
  -4 -11  -5  329.46   31.72
  -4  11  -5  388.39   34.29
  -4  11  -6   83.77   11.02
  -4 -11  -6   84.14   11.23
   4 -11   6   62.45   10.64
  -4  11  -7    0.59    1.98
  -4  11  -7    0.81    2.71
   4 -11   7    1.95    3.01
   4 -11   8    3.71    1.88
  -4  11  -8    3.59    1.94
   4 -11   8    5.15    3.07
   4 -11   8    5.71    2.65
  -4  12  10    3.86    1.59
   4  12 -10    6.56    2.12
  -4 -12   9  288.28   38.97
  -4 -12   9  433.29   41.03
  -4 -12   9  321.77   37.58
  -4  12   9  617.25   40.49
   4  12  -9  610.82   40.08
   4  12  -9  659.72   41.31
  -4 -12   8   17.16    5.45
   4  12  -8   17.41    4.41
  -4 -12   7   19.55    6.08
   4  12  -7    8.79    4.59
  -4 -12   6   44.16    9.44
  -4  12   6   41.61    9.37
   4  12  -6   51.34    8.67
  -4 -12   5   22.59    6.73
  -4  12   5   30.86    8.90
  -4  12   5   22.55    5.61
  -4  12   4    3.00    3.83
  -4 -12   4   -1.18    3.32
  -4  12   4    1.78    2.99
  -4 -12   3  332.31   33.91
  -4  12   3  279.81   32.09
  -4  12   3  346.52   33.55
  -4  12   2   39.58   12.52
  -4 -12   2   34.14    7.66
  -4  12   2   23.51    6.73
  -4  12   2   35.96    7.49
  -4  12   1  502.93   39.42
  -4 -12   1  300.48   34.98
  -4  12   1  499.91   42.94
  -4 -12   1  495.52   38.96
  -4 -12   1  266.46   34.25
  -4  12   0   58.88    9.71
   4 -12   0   38.51    7.97
  -4  12   0   49.05   11.74
  -4  12   0   42.13    7.56
  -4 -12   0   54.44    9.32
  -4 -12   0   51.47    7.30
   4 -12   1  278.73   30.68
  -4  12  -1  321.93   29.69
  -4 -12  -1  246.89   27.02
  -4 -12  -1  282.93   29.83
  -4  12  -1  348.05   30.90
  -4  12  -1  283.54   31.80
  -4  12  -2  107.80   13.67
  -4 -12  -2  103.39   13.72
  -4  12  -2  124.36   14.89
  -4  12  -2   86.05   14.12
  -4  12  -3  493.90   42.41
  -4 -12  -3  424.30   40.44
  -4  12  -3  435.42   40.96
  -4 -12  -3  400.19   39.41
  -4 -12  -4    3.41    2.42
  -4 -12  -4    0.45    1.60
  -4  12  -4    3.26    3.12
  -4  12  -4    3.58    2.63
  -4 -12  -5   60.94    7.76
  -4  12  -5   74.45    9.44
  -4  12  -5   59.55    9.19
  -4  12  -5   67.15   10.84
  -4  12  -6  199.97   22.05
   4 -12   6  208.51   22.64
  -4  12  -6  210.87   20.71
  -4  12  -7   52.61    6.99
   4 -12   7   51.54    7.08
  -4  12  -7   65.85    7.53
  -4  12  -7   66.89    8.39
  -4  12  -8   39.30    5.36
   4  13  -8    3.60    1.99
  -4 -13   8   -1.77    1.77
  -4 -13   7  123.53   12.94
   4  13  -7  146.21   12.29
   4  13  -7  156.47   12.58
  -4 -13   6    0.82    2.47
   4  13  -6    9.63    3.68
  -4  13   6    5.14    3.21
  -4  13   6    3.04    4.84
  -4 -13   5 1062.19   91.32
   4  13  -5 1180.17   90.92
  -4  13   5 1066.98   90.46
  -4  13   5 1133.26   91.26
  -4 -13   5  795.18   89.44
  -4 -13   4   13.21    4.63
  -4  13   4   13.54    4.46
  -4  13   4   15.00    4.37
  -4  13   3   28.10    5.95
  -4  13   3   26.90    7.79
  -4 -13   3    3.88    3.13
  -4 -13   3   20.76    5.50
  -4  13   3   31.21    6.45
  -4 -13   3   25.32    6.13
  -4 -13   2    1.37    2.21
  -4  13   2    8.64    6.88
  -4 -13   2    8.28    3.64
  -4  13   2    4.71    3.14
  -4  13   2    5.23    3.22
  -4  13   1  624.08   47.34
  -4  13   1  691.84   50.90
  -4 -13   1  608.69   47.86
  -4 -13   1  572.54   44.95
  -4  13   1  692.10   48.88
  -4 -13   0    2.41    2.57
  -4 -13   0    3.53    2.00
   4 -13   0    0.66    2.52
  -4  13   0    5.83    6.76
  -4 -13  -1  188.53   21.00
  -4  13  -1  224.41   23.23
  -4  13  -1  240.24   21.68
   4 -13   1  161.93   20.79
  -4 -13  -2    1.24    1.98
  -4  13  -2    2.61    2.09
  -4  13  -2    3.80    4.14
   4 -13   2    3.26    3.25
  -4  13  -2    2.96    2.84
  -4  13  -3    7.47    3.17
  -4  13  -3    4.64    3.57
   4 -13   3    4.06    3.25
  -4 -13  -3    5.55    2.00
  -4 -13  -3    3.00    2.02
  -4  13  -3    5.44    2.60
   4 -13   4   -0.75    2.76
  -4  13  -4    4.29    2.28
  -4 -13  -4    1.77    1.56
  -4  13  -4    1.19    1.90
  -4  13  -5  170.65   15.54
   4 -13   5  156.50   16.38
  -4  13  -5  118.44   14.64
  -4  13  -6   -0.46    1.88
  -4  13  -6   -0.33    1.26
   4 -13   6   -0.36    1.26
  -4  13  -6    0.37    2.24
   4 -13   6    1.42    1.94
   4  14  -7    4.16    1.72
   4  14  -7    5.16    1.65
  -4  14   7    1.75    1.38
  -4 -14   7    3.50    1.68
   4  14  -6    4.14    2.28
  -4 -14   6   -0.44    1.15
   4  14  -6    1.49    1.58
  -4 -14   6    1.34    1.65
  -4  14   6    1.62    1.55
  -4  14   5   74.19    8.25
  -4 -14   5   52.34    7.37
   4  14  -5   92.83    8.59
  -4 -14   5   32.61    6.60
  -4  14   5   65.82    8.61
  -4 -14   5   50.23    7.38
  -4 -14   4    8.38    2.85
  -4 -14   4    5.67    2.66
  -4 -14   4    5.21    2.51
  -4  14   4    3.35    2.34
  -4 -14   3  156.93   15.47
  -4  14   3  186.17   18.48
  -4  14   3  134.02   16.04
  -4 -14   3  108.02   15.00
   4  14  -3  225.21   18.00
  -4  14   3  207.85   17.83
  -4 -14   2   22.08    3.77
  -4  14   2   12.35    3.84
  -4  14   2   22.05    6.57
  -4 -14   2   28.58    5.24
  -4  14   1  260.51   25.94
  -4  14   1  283.98   27.18
  -4 -14   1  255.62   25.79
  -4  14   0    1.19    2.00
  -4 -14   0    1.10    1.66
  -4  14   0   -0.62    3.87
  -4  14  -1  141.50   13.45
  -4  14  -1  130.58   13.95
  -4 -14  -1   98.05   11.28
  -4 -14  -1  116.76   12.40
   4 -14   1   91.29   11.33
  -4 -14  -2   92.57    9.82
  -4  14  -2  108.25   11.88
   4 -14   2   70.68    9.59
  -4 -14  -3  174.83   17.92
   4 -14   3  204.70   19.45
  -4  14  -3  191.68   19.22
   4 -14   4   16.71    3.15
  -4  14  -4    6.69    2.27
   4  15  -4    3.19    1.46
   4  15  -3    4.67    1.76
  -4  15   3    3.90    2.89
  -4  15   2   30.18    4.77
  -4 -15   2   18.51    3.53
  -4  15   1   92.73   11.33
  -4 -15   1  113.13   11.60
  -4 -15   0   25.44    3.64
  -4  15   0   18.10    3.50
  -4  15  -1   79.90    8.73
  -5   0  15   11.77    3.37
  -5   0  15   -0.51    2.90
  -5   0  14   -1.11    3.32
  -5   0  14    0.97    3.43
  -5   0  13   38.46   10.71
  -5   0  13   32.85    9.38
  -5   0  13   32.68    6.02
  -5   0  12    2.28    5.91
  -5   0  12    0.94    2.46
  -5   0  12   -4.05    6.08
  -5   0  11  660.93   66.68
  -5   0  11  865.42   78.16
  -5   0  10   -1.37    3.24
  -5   0  10    4.74    5.03
  -5   0  10    2.73    6.48
  -5   0  10   -5.89    6.25
  -5   0  10   -1.27    2.69
  -5   0   9  282.10   33.80
  -5   0   9  313.09   33.01
  -5   0   9  209.46   46.33
  -5   0   9  323.34   41.47
  -5   0   9  332.15   34.95
  -5   0   8    1.51    3.20
  -5   0   8   -1.33    3.17
  -5   0   8   -5.27    9.68
  -5   0   8    2.31    4.24
  -5   0   8    2.48    7.44
  -5   0   7  224.63   30.15
  -5   0   7  193.72   30.03
  -5   0   7  215.04   27.11
  -5   0   7  231.03   33.56
  -5   0   7  219.49   24.91
  -5   0   7  268.37   43.15
  -5   0   6    1.80    3.82
  -5   0   6    3.55    4.61
  -5   0   6   -1.44    3.06
  -5   0   6    0.79    2.38
  -5   0   6   -3.70    6.79
  -5   0   6   -2.25    5.34
  -5   0   6    1.93    3.07
  -5   0   5   13.27    5.87
  -5   0   5   28.06    7.93
  -5   0   5   24.50   11.37
  -5   0   5   26.27    6.78
  -5   0   5   13.22    5.84
  -5   0   5   25.99    7.18
  -5   0   5   18.03    5.25
  -5   0   4   -0.98    4.18
  -5   0   4    1.13    3.78
  -5   0   4   -0.83    2.51
  -5   0   4    2.61    2.26
  -5   0   4   -1.06    2.76
  -5   0   4   -2.61    3.92
  -5   0   4    1.25    3.51
  -5   0   3   67.64   11.68
  -5   0   3   84.64   11.61
  -5   0   3   96.93   12.65
  -5   0   3   53.62   15.17
  -5   0   3   84.11   12.85
  -5   0   3   79.14   16.76
  -5   0   2   -6.88    8.78
  -5   0   2    1.97    4.55
  -5   0   2   -2.18    2.31
  -5   0   1  415.29   51.52
  -5   0   1  400.71   51.28
  -5   0   1  516.98   45.48
  -5   0   0    0.89    3.41
  -5   0   0    0.66    1.58
  -5   0   0    0.69    2.30
  -5   0   0   -2.51    6.52
  -5   0   0   -1.92    4.31
  -5   0  -1   -1.04    5.75
  -5   0  -1    2.77    5.89
  -5   0  -1   10.05    4.55
  -5   0  -1    1.98    2.12
  -5   0  -1    2.23    2.50
  -5   0  -1    6.30    3.71
  -5   0  -2   -1.19    5.81
  -5   0  -2   -3.22    6.83
  -5   0  -2   -0.93    3.13
  -5   0  -2    0.73    2.32
  -5   0  -2    1.00    3.00
  -5   0  -3 2433.74  231.09
  -5   0  -3 3002.87  236.12
  -5   0  -3 2858.85  234.96
  -5   0  -3 2670.99  230.64
  -5   0  -3 2685.71  250.66
  -5   0  -3 2714.38  234.52
  -5   0  -3 2852.38  233.28
  -5   0  -4   -0.88    2.29
  -5   0  -4   -4.68   11.10
  -5   0  -4    1.66    5.86
  -5   0  -4    2.41    5.26
  -5   0  -4    1.88    3.72
  -5   0  -5   95.85   14.81
  -5   0  -5  126.56   21.36
  -5   0  -5   94.77   28.96
  -5   0  -5  139.47   16.26
  -5   0  -5  169.63   19.46
  -5   0  -6   -4.46   12.96
  -5   0  -6    2.50    4.95
  -5   0  -6    1.99    3.16
  -5   0  -6   -3.56    6.26
  -5   0  -6    0.83    2.79
  -5   0  -7  544.65   79.21
  -5   0  -7 1041.69   82.54
  -5   0  -7  834.77   76.66
  -5   0  -7  920.64   76.06
  -5   0  -7  691.36  103.36
  -5   0  -8    6.55    7.68
  -5   0  -8    1.12    4.46
  -5   0  -8    1.57    5.78
  -5   0  -8   -0.99    3.95
  -5   0  -9   31.57    9.09
  -5   0  -9   31.14   11.63
  -5   0 -10    2.01    3.70
  -5   0 -10   -1.37    5.43
  -5   0 -11  105.78   14.52
  -5   0 -12    1.90    2.52
  -5   0 -12   -0.34    1.21
  -5   1  15  121.86   14.20
  -5  -1  15  125.96   14.64
  -5  -1  14   19.49    6.02
  -5   1  14   15.93    5.37
  -5  -1  13  684.83   67.02
  -5  -1  13  818.55   73.14
  -5   1  13  872.05   73.95
  -5   1  12   12.48    4.24
  -5  -1  12    9.43    4.40
   5   1 -12    8.93    3.54
  -5   1  12   12.17    7.51
  -5  -1  11   16.83    5.94
  -5   1  11   15.08    5.22
  -5  -1  11   17.06    5.84
  -5  -1  11    7.33    7.85
  -5   1  11   17.33    9.88
  -5  -1  11   -3.03    7.28
  -5  -1  10  562.00   60.52
  -5  -1  10  576.15   54.25
  -5   1  10  493.52   51.19
  -5   1  10  465.22   72.15
  -5  -1  10  544.02   76.37
  -5  -1  10  590.99   54.53
  -5   1  10  554.75   61.20
  -5  -1  10  368.69   58.79
  -5  -1  10  525.34   51.53
  -5  -1   9  318.60   53.71
  -5   1   9  264.18   50.54
  -5   1   9  261.94   38.66
  -5  -1   9  329.27   41.36
  -5  -1   9  362.03   36.66
  -5   1   9  286.14   33.16
  -5   1   9  329.84   35.41
  -5  -1   9  285.67   33.77
  -5  -1   9  325.13   33.17
  -5  -1   9  229.69   40.70
  -5   1   9  325.54   42.67
  -5  -1   8  215.84   40.30
  -5   1   8  170.53   36.70
  -5   1   8  165.84   27.54
  -5  -1   8  214.65   29.87
  -5  -1   8  197.70   25.60
  -5   1   8  196.18   24.09
  -5  -1   8  201.07   23.60
  -5   1   8  207.16   23.62
  -5  -1   8  161.50   19.78
  -5   1   8  170.70   28.99
  -5  -1   8  168.06   30.47
  -5  -1   7  480.69   61.21
  -5   1   7  385.19   47.63
  -5  -1   7  565.95   50.77
  -5   1   7  428.79   44.07
  -5  -1   7  458.60   46.45
  -5  -1   7  468.99   43.18
  -5   1   7  424.30   42.41
  -5  -1   7  408.64   41.59
  -5  -1   7  358.03   39.85
  -5  -1   7  396.19   50.94
  -5  -1   6  343.77   32.64
  -5  -1   6  296.99   32.34
  -5   1   6  327.91   33.25
  -5   1   6  373.94   36.14
  -5  -1   6  359.49   47.43
  -5   1   6  309.97   37.50
  -5   1   6  290.23   31.59
  -5   1   6  278.15   34.01
  -5  -1   6  326.97   36.57
  -5   1   6  272.49   33.82
  -5  -1   6  331.07   35.66
  -5  -1   6  297.56   39.17
  -5  -1   6  350.75   33.66
  -5   1   6  307.01   33.26
  -5  -1   6  355.58   36.54
  -5  -1   6  371.45   38.02
  -5   1   6  306.58   34.86
  -5   1   6  321.30   37.33
  -5   1   5   93.75   15.85
  -5  -1   5   73.41   13.69
  -5   1   5   62.73   13.61
  -5   1   5   99.48   15.22
  -5  -1   5   97.44   13.18
  -5  -1   5   98.27   15.16
  -5   1   5  107.26   14.15
  -5   1   5   84.88   12.30
  -5   1   5   91.75   14.14
  -5  -1   5  114.53   14.84
  -5  -1   5   79.93   13.59
  -5   1   5   96.46   12.37
  -5  -1   5  114.44   22.43
  -5   1   4  109.26   16.41
  -5  -1   4  116.08   21.67
  -5  -1   4  129.94   15.78
  -5   1   4  105.26   15.02
  -5  -1   4  104.71   15.77
  -5   1   4  104.07   16.24
  -5  -1   4  118.09   14.81
  -5  -1   4  103.69   15.39
  -5   1   4  118.94   15.26
  -5  -1   4  115.76   14.77
  -5   1   4   87.39   14.69
  -5  -1   4  116.29   15.55
  -5  -1   4  102.55   14.56
  -5  -1   3  174.55   22.15
  -5   1   3  155.96   21.73
  -5  -1   3  221.00   22.73
  -5   1   3  241.27   23.19
  -5  -1   3  252.75   31.10
  -5   1   3  203.35   22.69
  -5  -1   3  146.73   27.40
  -5   1   3  181.44   22.80
  -5  -1   3  214.69   23.34
  -5  -1   3  218.06   22.58
  -5  -1   3  192.11   21.81
  -5   1   2  119.47   14.68
  -5  -1   2   71.42   17.67
  -5   1   2   74.83   12.45
  -5  -1   2   86.33   12.55
  -5  -1   1  799.69   68.10
  -5  -1   1  882.44   68.35
  -5  -1   1  790.70   68.22
  -5   1   1  786.62   68.38
  -5  -1   1  832.92   78.90
  -5  -1   1  518.68   67.94
  -5  -1   1  691.63   65.87
  -5  -1   1  681.30   75.53
  -5  -1   1  752.72   67.51
  -5  -1   0   22.56    6.11
  -5  -1   0   23.91    6.16
  -5  -1   0   23.89    5.50
  -5  -1   0   18.78    6.33
  -5  -1   0   28.54   10.50
  -5   1   0   31.41    7.51
  -5   1   0   26.57    5.91
  -5  -1   0   28.25    5.64
  -5   1  -1   58.76   10.43
  -5  -1  -1   55.87    9.57
  -5   1  -1   62.78    8.76
  -5  -1  -1   66.60    9.56
  -5  -1  -1   58.17    9.00
  -5  -1  -1   77.68   11.91
  -5   1  -1   65.32   11.63
  -5  -1  -1   77.29   18.16
  -5   1  -1   58.05    9.64
  -5  -1  -1   52.54    8.85
  -5  -1  -2  389.73   34.87
  -5   1  -2  331.43   33.96
  -5   1  -2  287.23   31.50
  -5  -1  -2  279.87   29.82
  -5   1  -2  296.47   29.77
  -5  -1  -2  282.43   30.50
  -5  -1  -2  353.58   46.03
  -5  -1  -3   62.78   19.92
  -5  -1  -3   67.18   12.85
  -5  -1  -3  123.22   17.64
  -5   1  -3   67.31   13.18
  -5  -1  -3   69.88   12.14
  -5   1  -3   60.24    9.89
  -5  -1  -3   69.10   10.26
  -5   1  -3   73.10   10.92
  -5   1  -3   64.13   11.60
  -5  -1  -3   67.76   10.52
  -5  -1  -4    6.69    6.67
  -5  -1  -4    7.26    5.34
  -5   1  -4   11.10    5.60
  -5  -1  -4    7.51    4.65
  -5  -1  -4    4.70    7.09
  -5   1  -4    5.22    3.53
  -5   1  -4   14.07    4.72
  -5  -1  -4    5.71    3.74
  -5   1  -4   18.53    7.40
  -5  -1  -4   17.24    6.85
  -5  -1  -5   27.36   10.67
  -5  -1  -5   17.45    6.64
  -5   1  -5   18.97    6.86
  -5   1  -5   11.38    7.12
  -5  -1  -5   29.18    9.19
  -5  -1  -5   13.90    4.42
  -5   1  -5   18.25    5.49
  -5  -1  -5   16.41    5.42
  -5  -1  -6   99.63   13.17
  -5   1  -6   78.79   12.33
  -5  -1  -6   74.05   17.91
  -5  -1  -6   69.27   16.94
  -5  -1  -6  103.80   16.34
  -5  -1  -6   57.83   12.43
  -5   1  -6   81.17   13.82
  -5  -1  -6   92.48   30.70
  -5  -1  -6   81.65   12.16
  -5  -1  -7 1101.05   80.95
  -5   1  -7  917.31   81.51
  -5  -1  -7  876.02   81.02
  -5  -1  -7 1028.24  115.42
  -5  -1  -7 1007.03   89.39
  -5  -1  -7 1238.04   86.68
  -5   1  -7 1049.23   81.44
  -5   1  -8    3.39    4.94
  -5  -1  -8    8.20    8.42
  -5   1  -8   -1.77    5.95
  -5  -1  -8    2.76    5.28
  -5  -1  -8   -0.93    3.11
  -5   1  -8   -1.05    4.01
  -5   1  -9  135.00   19.65
  -5  -1  -9  159.98   19.10
  -5   1  -9  100.71   16.08
  -5  -1  -9  173.42   22.80
  -5  -1 -10   42.93    9.74
  -5   1 -10   13.29    6.48
  -5  -1 -11  470.81   59.05
  -5   1 -11  945.49   62.61
  -5   1 -12    6.83    2.36
  -5  -1 -12   17.21    3.78
  -5   1 -12   12.60    2.79
  -5   2  15   18.31    3.53
  -5  -2  15   17.13    3.96
  -5  -2  15   11.64    3.28
  -5   2  14   45.07    7.65
  -5  -2  14   42.79    8.66
  -5  -2  14   17.84    6.29
  -5   2  14   17.65    5.80
  -5  -2  14   39.38    5.30
  -5  -2  13   37.22   10.80
  -5   2  13   40.47    9.15
  -5  -2  13   29.13    8.49
  -5   2  13   27.83    7.94
   5   2 -13   28.20    5.42
  -5  -2  13   37.82    6.97
  -5   2  12  319.86   34.72
  -5  -2  12  236.00   35.23
  -5  -2  12  245.88   29.22
   5   2 -12  251.55   27.52
  -5  -2  12  326.03   35.28
  -5   2  12  309.60   33.57
  -5  -2  11  400.14   38.36
  -5   2  11  396.36   44.50
  -5  -2  11  255.70   43.70
  -5  -2  11  368.39   39.71
  -5   2  11  322.65   36.13
  -5   2  11  431.15   44.72
  -5  -2  11  481.06   47.43
  -5   2  10    2.42    5.74
  -5  -2  10   20.78   11.62
  -5  -2  10    5.95    3.79
  -5   2  10   -2.90    5.33
  -5  -2  10    9.60    7.64
  -5   2  10    6.98    7.81
  -5  -2  10    4.52    5.30
  -5   2  10    5.72    4.71
  -5  -2  10    1.69    3.59
  -5  -2  10  -10.36   17.39
  -5   2  10   -4.98   15.86
  -5   2   9   22.67    9.38
  -5  -2   9    3.50    7.58
  -5  -2   9   28.07    7.19
  -5  -2   9   22.61    6.88
  -5  -2   9   20.66    7.70
  -5   2   9   14.40    8.23
  -5  -2   9   28.15   10.96
  -5   2   9   16.70   10.24
  -5  -2   9   50.29   19.30
  -5   2   9   25.36   14.32
  -5   2   9   11.25    5.53
  -5  -2   9   22.28    8.27
  -5  -2   8  128.06   27.43
  -5   2   8  193.30   28.73
  -5  -2   8  186.51   23.65
  -5  -2   8  162.06   20.71
  -5  -2   8  180.03   25.49
  -5   2   8  177.82   22.15
  -5   2   8  191.47   28.93
  -5  -2   8  266.42   40.83
  -5   2   8  109.21   30.15
  -5  -2   8  158.29   21.35
  -5   2   8  184.23   23.35
  -5  -2   8  158.46   19.34
  -5   2   8  139.46   25.46
  -5  -2   8  235.64   28.77
  -5  -2   7  155.89   19.15
  -5  -2   7   56.62   17.64
  -5   2   7  156.72   23.53
  -5   2   7  128.29   17.32
  -5  -2   7  127.00   20.57
  -5   2   7  121.17   17.52
  -5   2   7  141.91   23.30
  -5  -2   7  123.85   26.71
  -5   2   7  121.36   27.51
  -5  -2   7  149.46   18.12
  -5   2   7  136.13   18.33
  -5  -2   7  117.16   15.91
  -5  -2   7  178.13   22.64
  -5   2   7   88.04   18.70
  -5   2   6  829.41   82.92
  -5  -2   6  941.33   84.14
  -5   2   6  878.31   82.77
  -5  -2   6  849.65   83.76
  -5   2   6 1000.27   89.08
  -5  -2   6  734.73   86.19
  -5   2   6  926.57   81.87
  -5   2   6  906.13   87.87
  -5  -2   6  962.76   85.28
  -5   2   6  817.89   84.68
  -5  -2   6  913.64   81.57
  -5   2   6  941.75   82.46
  -5   2   6  956.34   83.56
  -5  -2   6 1054.92   97.88
  -5   2   6  931.29   97.29
  -5  -2   6  848.78   80.95
  -5  -2   5   23.51    7.06
  -5   2   5   20.75    6.67
  -5   2   5   36.22    9.10
  -5  -2   5   30.29    7.69
  -5   2   5   39.37    9.03
  -5   2   5   24.55    7.18
  -5  -2   5   10.11    6.20
  -5  -2   5   13.21    4.64
  -5   2   5   14.26    7.00
  -5   2   5   19.44    5.94
  -5  -2   5    7.35    5.11
  -5   2   5   18.17    5.95
  -5  -2   5   22.77    7.41
  -5  -2   5   23.13    6.11
  -5  -2   5   18.47    7.08
  -5   2   5   17.88    7.43
  -5   2   5   31.26    7.67
  -5  -2   5   13.73    7.87
  -5   2   5   18.20    9.24
  -5  -2   4  345.17   39.56
  -5   2   4  287.71   38.89
  -5  -2   4  228.85   29.78
  -5  -2   4  278.47   30.21
  -5   2   4  317.12   30.26
  -5  -2   4  299.05   30.04
  -5  -2   4  333.91   33.21
  -5   2   4  268.40   30.21
  -5   2   4  267.32   30.95
  -5  -2   4  283.43   30.74
  -5   2   4  281.29   32.31
  -5   2   3  229.26   24.73
  -5  -2   3  217.87   25.19
  -5  -2   3  238.83   31.61
  -5   2   3  254.47   33.00
  -5  -2   3  263.60   28.31
  -5   2   3  189.27   24.46
  -5   2   3  217.32   31.27
  -5  -2   3  272.40   35.75
  -5  -2   3  226.35   24.68
  -5  -2   3  262.00   26.07
  -5   2   3  228.24   25.84
  -5  -2   3  210.36   24.90
  -5  -2   2 1819.81  166.11
  -5  -2   2 2176.65  170.04
  -5   2   2 2003.41  175.32
  -5  -2   2 2046.37  177.89
  -5  -2   2 1869.15  165.83
  -5  -2   2 1588.94  164.47
  -5  -2   2 2329.67  167.82
  -5   2   2 2050.70  167.45
  -5   2   2 1985.49  166.67
  -5  -2   2 1913.30  166.46
  -5   2   1   14.64    5.36
  -5  -2   1    7.07    4.08
  -5  -2   1   16.59    5.25
  -5   2   1   15.47    5.10
  -5  -2   1   17.80    5.25
  -5   2   1   20.18    8.63
  -5  -2   1   17.89    8.62
  -5  -2   1   15.97    5.89
  -5  -2   1   15.47    4.30
  -5  -2   1    9.79    6.93
  -5   2   1   12.86    7.25
  -5  -2   1   11.19    4.08
  -5  -2   1    4.66    2.99
  -5  -2   1    6.40    3.34
  -5  -2   0  351.02   49.93
  -5  -2   0  657.08   50.88
  -5   2   0  530.47   50.17
  -5   2   0  488.89   48.18
  -5  -2   0  469.59   47.88
  -5  -2   0  493.64   48.56
  -5  -2   0  550.52   49.95
  -5  -2   0  703.68   64.22
  -5   2   0  579.42   58.79
  -5  -2   0  554.43   48.83
  -5   2   0  523.77   58.10
  -5  -2   0  555.31   59.87
  -5   2   0  581.51   58.31
  -5   2  -1  175.58   20.33
  -5  -2  -1  186.74   19.92
  -5  -2  -1  162.19   17.52
  -5   2  -1  116.09   15.65
  -5   2  -1  161.97   18.29
  -5  -2  -1  139.97   17.33
  -5   2  -1  177.57   27.32
  -5  -2  -1  148.57   26.40
  -5  -2  -1  135.38   17.16
  -5   2  -1  182.55   26.66
  -5   2  -2  164.99   20.92
  -5   2  -2  233.56   27.10
  -5  -2  -2  190.31   21.33
  -5  -2  -2  211.21   24.31
  -5   2  -2  219.95   23.32
  -5  -2  -2  176.33   20.92
  -5   2  -2  202.62   21.17
  -5  -2  -2  189.55   21.39
  -5   2  -2  178.97   28.48
  -5  -2  -2  226.93   24.46
  -5   2  -2  207.28   25.03
  -5   2  -2  184.04   20.17
  -5   2  -2  202.37   31.55
  -5  -2  -2  205.28   33.36
  -5  -2  -2  199.82   22.52
  -5   2  -2  199.80   22.78
  -5  -2  -3  815.65   75.44
  -5   2  -3 1033.88   77.74
  -5   2  -3 1008.34   78.17
  -5   2  -3  811.56   74.75
  -5   2  -3  762.22   75.91
  -5  -2  -3  802.75   77.20
  -5   2  -3  738.34   78.24
  -5   2  -3  753.36   74.37
  -5  -2  -3  904.97   77.65
  -5  -2  -3  868.66   78.95
  -5   2  -3  874.64   78.00
  -5  -2  -3  946.44   96.46
  -5   2  -3  873.09   91.88
  -5  -2  -3  775.45   74.28
  -5   2  -4    3.55    4.61
  -5  -2  -4    5.33    4.69
  -5  -2  -4    1.26    4.22
  -5   2  -4   -1.46    5.13
  -5  -2  -4   -1.60    6.14
  -5  -2  -4    1.23    3.45
  -5   2  -4   -1.02    3.73
  -5   2  -4    3.20    3.89
  -5  -2  -4   -4.52    9.59
  -5   2  -4    4.08    8.66
  -5   2  -5    4.11    6.54
  -5  -2  -5    1.39    3.91
  -5  -2  -5    5.17   10.98
  -5   2  -5   -4.83   10.26
  -5  -2  -5    3.86    5.63
  -5   2  -5    3.98    4.67
  -5  -2  -5    0.98    2.75
  -5   2  -5   -1.00    3.02
  -5   2  -5    1.71    6.30
  -5  -2  -5   14.58    7.74
  -5   2  -6   66.18   15.03
  -5  -2  -6   64.48   12.40
  -5  -2  -6   54.26   11.42
  -5   2  -6   47.39   11.34
  -5  -2  -6   61.76   24.31
  -5   2  -6   54.91   23.07
  -5  -2  -6   46.25    9.09
  -5  -2  -6   60.80   10.10
  -5   2  -6   61.71   10.70
  -5  -2  -6   86.77   17.29
  -5   2  -6   77.62   15.48
  -5  -2  -7  874.07   77.29
  -5   2  -7  881.52   83.24
  -5   2  -7  791.19   75.87
  -5  -2  -7  989.57  107.64
  -5   2  -7  575.55   94.16
  -5  -2  -7  782.19   73.56
  -5  -2  -7 1182.99   85.73
  -5   2  -7  695.58   79.52
  -5   2  -7  772.73   74.86
  -5  -2  -8   42.30    9.16
  -5   2  -8   38.87    8.97
  -5  -2  -8   35.94   11.64
  -5   2  -8   15.57   10.31
  -5  -2  -8   36.43    7.32
  -5   2  -9   16.53    8.65
  -5  -2  -9   39.87   10.59
  -5   2  -9   23.05    7.20
  -5   2 -10   64.62   12.66
  -5  -2 -10   88.19   13.33
  -5   2 -10   78.46   13.33
  -5  -2 -11    9.13    4.30
  -5   2 -11   14.52    4.99
  -5   2 -11    8.18    3.09
  -5   2 -11   13.12    4.78
  -5   2 -12   83.08    8.20
  -5   2 -12   72.44    8.38
  -5  -3  14   85.95   13.07
  -5   3  14  153.74   14.68
  -5  -3  14  137.79   16.21
   5   3 -14  102.99   11.04
  -5  -3  14  112.95   12.17
  -5   3  13    5.92    3.65
  -5  -3  13   10.66    5.49
  -5  -3  13    1.63    5.20
  -5   3  13    3.26    3.29
   5   3 -13    6.02    2.96
  -5  -3  13    5.14    3.43
  -5   3  12    4.14    4.40
  -5  -3  12   -1.60    5.37
  -5  -3  12   -2.45    3.90
   5   3 -12    1.77    2.96
  -5  -3  12    6.87    6.42
  -5   3  12    4.44    4.97
  -5  -3  11   22.32    6.44
  -5  -3  11    7.64    7.17
  -5   3  11   15.56    7.25
  -5  -3  11   23.68    7.99
  -5  -3  11   17.27   10.68
  -5   3  11   20.11    7.65
  -5  -3  10  549.60   51.97
  -5   3  10  458.43   58.91
  -5  -3  10  544.43   55.70
  -5   3  10  490.78   54.12
  -5  -3  10  504.31   49.44
  -5  -3  10  608.95   54.18
  -5  -3  10  582.59   55.54
  -5   3  10  505.77   48.84
  -5   3  10  591.47   57.09
  -5  -3   9   -0.88    2.30
  -5   3   9    4.72    3.06
  -5  -3   9   -1.37    3.25
  -5  -3   9    4.99    5.58
  -5   3   9   -3.09    4.64
  -5  -3   9    4.31    6.47
  -5   3   9   -4.34    7.98
  -5  -3   9    2.31    3.01
  -5  -3   9   -3.23    7.66
  -5   3   9   -2.18    4.63
  -5  -3   9    4.03    6.77
  -5   3   9    2.05    4.36
  -5  -3   9    4.18    3.91
  -5  -3   8  478.00   51.55
  -5   3   8  585.64   54.28
  -5  -3   8  562.28   53.98
  -5   3   8  666.35   57.38
  -5  -3   8  518.13   55.74
  -5  -3   8  574.78   53.18
  -5  -3   8  714.02   74.00
  -5   3   8  523.98   68.64
  -5  -3   8  687.58   59.69
  -5   3   8  449.91   55.86
  -5   3   8  600.26   60.01
  -5  -3   8  319.29   56.94
  -5  -3   8  574.55   56.65
  -5   3   8  690.17   67.24
  -5  -3   7  603.90   56.61
  -5   3   7  586.39   58.27
  -5  -3   7  465.62   57.61
  -5  -3   7  565.43   51.95
  -5   3   7  630.96   54.58
  -5   3   7  533.17   52.51
  -5   3   7  536.94   60.31
  -5  -3   7  581.38   65.59
  -5   3   7  422.10   62.34
  -5  -3   7  529.51   51.65
  -5  -3   7  598.59   55.51
  -5   3   7  349.02   51.75
  -5  -3   6  740.49   71.96
  -5  -3   6  645.69   71.34
  -5   3   6  818.50   73.52
  -5  -3   6  770.95   67.46
  -5   3   6  838.66   69.39
  -5   3   6  803.92   69.23
  -5  -3   6  759.77   73.89
  -5   3   6  807.33   75.91
  -5  -3   6  842.07   80.70
  -5   3   6  660.37   78.70
  -5   3   6  707.82   66.34
  -5   3   6  658.18   66.64
  -5  -3   6  678.99   68.42
  -5   3   6  494.30   66.96
  -5   3   6  859.88   67.58
  -5  -3   6  648.44   67.32
  -5   3   5    1.82    3.99
  -5   3   5    1.38    4.65
  -5  -3   5    2.52    3.01
  -5   3   5    8.17    5.26
  -5  -3   5    3.81    4.53
  -5   3   5    5.02    4.43
  -5  -3   5    5.31    4.98
  -5   3   5    9.38    5.28
  -5  -3   5    5.08    5.40
  -5   3   5    5.77    5.31
  -5  -3   5    2.42    3.64
  -5   3   5    1.38    3.59
  -5   3   5    4.48    4.30
  -5  -3   5   10.70    5.50
  -5   3   5    7.59    5.16
  -5  -3   5    7.78    5.15
  -5   3   5   13.73    6.57
  -5  -3   5    0.98    2.55
  -5   3   5    7.75    4.08
  -5  -3   5   -1.74    4.13
  -5  -3   4  761.13   61.58
  -5  -3   4  514.33   62.42
  -5   3   4  558.38   62.33
  -5  -3   4  705.42   69.55
  -5   3   4  612.14   69.41
  -5  -3   4  777.80   62.20
  -5   3   4  559.78   60.78
  -5   3   4  585.65   59.43
  -5  -3   4  642.54   62.09
  -5   3   4  679.02   62.30
  -5  -3   4  575.93   61.24
  -5   3   4  647.76   64.21
  -5  -3   4  769.57   66.27
  -5  -3   4  795.62   61.48
  -5   3   3  145.91   20.53
  -5   3   3  110.44   23.40
  -5  -3   3  168.85   25.51
  -5   3   3  156.74   20.60
  -5   3   3  186.12   20.63
  -5  -3   3  159.10   18.97
  -5  -3   3  222.11   25.01
  -5  -3   3  191.90   20.57
  -5  -3   3  197.58   20.97
  -5   3   3  205.17   22.11
  -5  -3   2  124.72   15.12
  -5   3   2   95.10   14.58
  -5   3   2   88.74   13.99
  -5  -3   2   98.61   14.97
  -5  -3   2  117.45   15.66
  -5  -3   2   92.60   13.35
  -5   3   2  120.90   21.00
  -5  -3   2  131.38   23.60
  -5  -3   2  148.81   18.97
  -5  -3   2  112.60   14.57
  -5   3   2  110.01   21.44
  -5  -3   1  226.22   24.57
  -5   3   1  186.95   29.44
  -5  -3   1  239.28   34.26
  -5   3   1  187.08   30.18
  -5  -3   1  242.13   33.99
  -5  -3   1  284.39   25.91
  -5   3   1  273.00   26.30
  -5  -3   1  213.95   24.70
  -5   3   1  203.33   25.25
  -5  -3   1  237.66   25.99
  -5  -3   1  225.24   24.80
  -5  -3   1  196.36   23.88
  -5  -3   1  273.72   29.18
  -5  -3   1  236.71   25.21
  -5   3   0    2.79    7.26
  -5  -3   0    0.92    3.23
  -5   3   0   -1.03    5.66
  -5  -3   0   10.83    9.53
  -5   3   0    4.50    5.34
  -5   3   0    4.28    2.60
  -5  -3   0    6.33    3.46
  -5   3   0    2.15    6.03
  -5  -3   0   -2.59    9.53
  -5  -3   0   -1.74    4.53
  -5  -3   0    1.03    2.90
  -5  -3   0    1.92    3.07
  -5   3   0    3.97    2.92
  -5   3  -1    4.52    3.34
  -5  -3  -1    2.47    3.51
  -5  -3  -1    1.99    2.60
  -5  -3  -1    7.56    5.08
  -5  -3  -1    1.87    2.81
  -5   3  -1    2.78    6.61
  -5   3  -1    7.39    3.01
  -5   3  -1   -0.69    2.32
  -5  -3  -1    2.59    2.91
  -5   3  -1    3.44    5.44
  -5  -3  -1    2.91    6.19
  -5   3  -1    7.25    5.74
  -5  -3  -1    8.07    4.42
  -5   3  -2 1568.81  150.94
  -5   3  -2 1548.51  149.55
  -5   3  -2 1953.16  150.92
  -5   3  -2 1922.66  152.37
  -5   3  -2 1674.95  149.41
  -5  -3  -2 1619.83  150.82
  -5   3  -2 1879.46  151.59
  -5  -3  -2 2031.34  153.52
  -5  -3  -2 1561.09  149.15
  -5  -3  -2 1679.54  150.37
  -5  -3  -2 1803.14  150.64
  -5   3  -2 1973.67  164.85
  -5  -3  -2 1954.84  153.87
  -5   3  -2 1781.47  154.08
  -5   3  -2 1755.14  149.02
  -5   3  -2 1638.93  155.59
  -5  -3  -2 1843.79  167.05
  -5   3  -2 1621.80  161.57
  -5  -3  -3  166.13   20.28
  -5   3  -3  159.86   18.90
  -5   3  -3  101.81   19.34
  -5   3  -3  173.95   20.73
  -5  -3  -3  190.34   22.34
  -5   3  -3  166.56   20.53
  -5  -3  -3  166.42   19.16
  -5  -3  -3  153.88   19.21
  -5   3  -3  162.09   27.09
  -5  -3  -3  162.03   30.71
  -5   3  -3  184.29   30.44
  -5   3  -3  155.91   18.83
  -5   3  -3  207.58   21.61
  -5   3  -3  162.57   18.15
  -5  -3  -4   10.63    4.30
  -5  -3  -4    1.48    4.76
  -5   3  -4   13.04    5.92
  -5   3  -4    8.91    7.12
  -5   3  -4    5.96    4.26
  -5  -3  -4   16.11    5.50
  -5   3  -4    9.82    8.67
  -5  -3  -4    4.18    7.72
  -5   3  -4   14.62   11.00
  -5  -3  -4   12.03    5.32
  -5   3  -4   12.52    5.97
  -5   3  -5   54.25   12.69
  -5  -3  -5   83.12   14.33
  -5   3  -5   66.95   11.72
  -5  -3  -5   57.75    9.95
  -5   3  -5   33.72   11.75
  -5  -3  -5   97.27   25.98
  -5   3  -5   46.65   18.07
  -5   3  -6  740.26   68.13
  -5   3  -6  606.97   68.22
  -5  -3  -6  822.32   71.55
  -5  -3  -6  713.32   65.17
  -5   3  -6  708.77   65.96
  -5  -3  -6  751.56   64.54
  -5  -3  -6  956.61   96.56
  -5   3  -6  558.78   82.04
  -5   3  -6  545.27   70.51
  -5  -3  -7   39.94   11.50
  -5   3  -7   20.85    9.07
  -5  -3  -7   52.80   19.91
  -5   3  -7   34.72   18.43
  -5  -3  -7   32.46    7.22
  -5  -3  -7   40.33    7.48
  -5   3  -7   24.98   10.58
  -5   3  -7   32.66    8.87
  -5  -3  -8   37.01    7.06
  -5  -3  -8   59.61   12.60
  -5   3  -8   11.53    9.06
  -5   3  -8   42.36   12.46
  -5   3  -8   43.04    9.46
  -5   3  -9   24.25    9.32
  -5   3  -9   18.14    7.70
  -5   3  -9   24.38    5.90
  -5   3  -9   22.96    6.69
  -5   3 -10   15.63    6.08
  -5  -3 -10   27.20    6.85
  -5   3 -10   21.66    5.16
  -5   3 -10   17.83    5.21
  -5   3 -11   43.88    7.87
  -5  -3 -11   53.88    7.69
  -5   3 -12   11.73    2.98
  -5  -3 -12   20.95    3.23
  -5   4  14    0.47    1.49
   5   4 -14   -0.64    1.71
  -5  -4  14    1.40    1.78
  -5  -4  14    6.09    2.99
  -5  -4  14    1.01    2.22
  -5  -4  13    4.02    5.14
  -5   4  13    6.89    3.43
  -5  -4  13    0.92    3.11
  -5  -4  13    3.51    3.24
   5   4 -13    4.43    2.86
  -5  -4  12  292.04   36.11
  -5   4  12  258.26   34.52
  -5  -4  12  395.76   35.77
  -5   4  12  400.97   37.87
  -5  -4  12  432.78   43.30
  -5  -4  12  432.21   39.01
  -5  -4  11   20.15    7.53
  -5   4  11   13.83    6.47
  -5  -4  11   33.84    9.61
  -5  -4  11   33.98   11.46
  -5   4  11   39.83    9.75
  -5  -4  11   44.86    8.26
  -5  -4  10   -1.14    2.70
  -5  -4  10    1.41    3.33
  -5   4  10    1.60    5.89
  -5  -4  10   -3.37    7.58
  -5  -4  10    2.73    6.47
  -5   4  10    1.77    4.60
  -5  -4  10    4.82    4.82
  -5  -4   9    2.73    6.47
  -5   4   9    1.90    5.33
  -5   4   9    1.12    2.66
  -5  -4   9    1.76    4.18
  -5  -4   9    7.18    6.60
  -5   4   9    3.59    7.63
  -5   4   9    3.26    5.99
  -5  -4   9    4.61    3.47
  -5  -4   9    2.72    3.54
  -5  -4   9    3.10    4.39
  -5  -4   9    3.36    5.04
  -5   4   9    1.70    4.43
  -5  -4   9    3.43    5.15
  -5   4   8  325.86   37.11
  -5  -4   8  241.24   36.71
  -5   4   8  335.26   33.37
  -5  -4   8  366.19   46.51
  -5   4   8  338.25   45.51
  -5   4   8  294.21   42.03
  -5  -4   8  300.87   35.19
  -5  -4   8  284.97   32.27
  -5  -4   8  339.81   38.93
  -5  -4   8  312.82   34.63
  -5   4   8  200.33   32.36
  -5  -4   8  322.06   33.41
  -5   4   7   52.55   15.61
  -5  -4   7   59.57   15.58
  -5  -4   7   32.06   11.67
  -5   4   7   35.18   12.19
  -5  -4   7   55.14   11.00
  -5   4   7   36.23    9.70
  -5  -4   7   37.92    9.29
  -5   4   7   53.14   10.51
  -5  -4   7   56.58   13.85
  -5  -4   7   37.31   10.93
  -5   4   7   39.20   11.09
  -5  -4   7   47.06    9.29
  -5   4   6 1073.51   88.39
  -5  -4   6  650.37   82.62
  -5   4   6 1013.20   84.34
  -5  -4   6  902.55   89.11
  -5   4   6  883.13   83.48
  -5  -4   6 1152.61   95.39
  -5   4   6  850.88   92.44
  -5  -4   6  939.63   89.98
  -5   4   6  843.88   89.88
  -5   4   6  813.44   81.23
  -5  -4   6  711.01   82.46
  -5  -4   6 1077.45   84.07
  -5   4   6  753.10   82.55
  -5   4   6 1157.35   85.74
  -5  -4   6  971.27   82.43
  -5   4   5  140.38   20.12
  -5  -4   5  193.75   23.47
  -5   4   5  229.49   26.01
  -5  -4   5  156.27   21.58
  -5   4   5  166.86   21.50
  -5   4   5  202.62   23.20
  -5  -4   5  107.40   20.49
  -5   4   5  228.56   24.96
  -5   4   5  181.51   20.15
  -5  -4   5  197.11   27.21
  -5   4   5  164.65   21.53
  -5  -4   5  182.69   27.34
  -5   4   5  176.72   28.31
  -5  -4   5  192.36   26.51
  -5   4   5  145.81   24.17
  -5   4   5  195.89   22.57
  -5  -4   5  178.60   20.86
  -5   4   5  194.02   22.48
  -5   4   5  180.37   21.83
  -5   4   5  169.00   21.44
  -5  -4   5  150.00   22.15
  -5  -4   5  208.27   22.04
  -5   4   5  137.66   20.62
  -5   4   4   62.32   11.85
  -5  -4   4   93.23   12.46
  -5   4   4   64.47   10.25
  -5  -4   4   71.16   12.21
  -5   4   4   79.35   13.83
  -5   4   4   71.20   10.66
  -5   4   4   66.91   11.89
  -5  -4   4   36.01   10.95
  -5   4   4   58.55   10.74
  -5   4   4   49.67    9.12
  -5  -4   4   25.92    9.23
  -5   4   4   70.18   12.05
  -5  -4   4   77.56   14.97
  -5  -4   4   50.46    9.18
  -5   4   4   60.81   10.82
  -5  -4   4   48.42   12.09
  -5   4   4   63.34   12.45
  -5   4   4   87.33   13.82
  -5  -4   4   62.04   10.40
  -5   4   4   66.47   11.12
  -5   4   4   59.91   10.48
  -5  -4   4   67.47   11.88
  -5  -4   4   91.57   16.59
  -5   4   4   60.96   14.81
  -5   4   3  325.90   32.94
  -5   4   3  292.48   32.72
  -5   4   3  276.22   29.20
  -5   4   3  307.57   32.56
  -5  -4   3  241.92   31.28
  -5   4   3  278.41   30.50
  -5   4   3  228.24   28.31
  -5  -4   3  383.41   36.93
  -5   4   3  301.26   40.12
  -5  -4   3  243.50   28.80
  -5   4   3  242.64   29.80
  -5   4   3  301.01   31.66
  -5  -4   3  354.08   31.74
  -5  -4   3  313.76   29.72
  -5   4   3  246.07   29.14
  -5  -4   2 2197.56  181.19
  -5   4   2 2203.50  184.74
  -5   4   2 1915.60  179.74
  -5  -4   2 2519.19  187.62
  -5   4   2 2276.98  190.03
  -5  -4   2 2148.55  192.60
  -5   4   2 2293.81  196.58
  -5  -4   2 1962.73  180.77
  -5  -4   2 2377.73  181.03
  -5   4   2 2349.71  181.71
  -5  -4   2 2086.26  181.16
  -5   4   2 1766.62  178.22
  -5   4   2 2378.49  184.98
  -5   4   2 2180.02  181.17
  -5  -4   2 1964.42  182.81
  -5   4   2 1914.96  180.69
  -5  -4   1  338.34   31.46
  -5   4   1  275.38   29.67
  -5   4   1  225.02   27.25
  -5   4   1  264.73   26.10
  -5   4   1  283.81   29.77
  -5   4   1  205.09   25.89
  -5  -4   1  263.25   28.85
  -5   4   1  276.62   34.48
  -5  -4   1  357.77   40.51
  -5  -4   1  339.58   29.38
  -5   4   1  249.48   28.63
  -5  -4   1  297.66   29.03
  -5   4   1  307.76   32.45
  -5   4   1  262.76   31.50
  -5   4   0   70.05   11.32
  -5   4   0   80.45   12.35
  -5   4   0   63.00   10.68
  -5   4   0   48.68   10.31
  -5   4   0   52.15   13.19
  -5  -4   0   84.21   12.02
  -5  -4   0   77.34   11.89
  -5   4   0   70.58    9.55
  -5  -4   0   65.85   13.44
  -5  -4   0   71.62   11.63
  -5   4   0   79.57   16.22
  -5  -4   0   93.77   18.96
  -5   4   0   70.11   20.50
  -5  -4   0   95.14   19.93
  -5   4   0   74.57   15.74
  -5  -4   0   55.75   10.17
  -5   4   0   60.00   11.39
  -5  -4   0   73.91   11.19
  -5   4   0   72.92    9.63
  -5   4   0   54.91    9.32
  -5  -4   0   67.43   10.98
  -5   4  -1  229.28   29.64
  -5   4  -1  247.94   26.51
  -5  -4  -1  326.15   27.73
  -5   4  -1  228.63   24.17
  -5   4  -1  174.38   24.14
  -5   4  -1  202.96   23.97
  -5   4  -1  208.77   29.07
  -5  -4  -1  217.15   24.58
  -5  -4  -1  282.87   26.75
  -5  -4  -1  234.91   34.65
  -5   4  -1  198.70   30.60
  -5  -4  -1  193.11   28.05
  -5   4  -1  288.37   39.93
  -5  -4  -1  271.20   35.52
  -5   4  -1  235.55   31.82
  -5   4  -1  189.03   22.44
  -5   4  -1  209.72   23.11
  -5   4  -1  195.93   22.94
  -5  -4  -1  269.20   25.30
  -5  -4  -1  261.22   26.34
  -5   4  -1  209.99   26.22
  -5   4  -2  128.62   15.99
  -5  -4  -2  146.24   17.43
  -5   4  -2  119.77   15.17
  -5  -4  -2  152.39   18.53
  -5   4  -2  126.72   16.51
  -5   4  -2  123.88   15.84
  -5  -4  -2  140.16   16.82
  -5  -4  -2  127.18   17.07
  -5   4  -2  121.08   25.74
  -5   4  -2  141.92   17.47
  -5   4  -2  120.22   17.70
  -5   4  -2  123.99   16.59
  -5   4  -2  103.61   15.67
  -5   4  -2  241.75   25.10
  -5  -4  -2  133.63   25.34
  -5   4  -2  106.16   21.74
  -5  -4  -2  146.05   19.16
  -5   4  -2  215.36   24.21
  -5   4  -3   18.66    6.92
  -5   4  -3   21.14    6.49
  -5   4  -3   20.79    8.02
  -5  -4  -3   24.72    6.34
  -5  -4  -3   23.31    6.25
  -5   4  -3   29.44    6.98
  -5  -4  -3   25.62    6.61
  -5   4  -3   24.84   14.49
  -5   4  -3   31.26   11.84
  -5  -4  -3   23.94   13.72
  -5  -4  -3   23.98    6.43
  -5   4  -3   19.77    6.36
  -5   4  -3   38.89    9.90
  -5   4  -3   24.74    5.89
  -5  -4  -3   24.02    7.25
  -5   4  -3   20.27    6.30
  -5   4  -4   -1.68    5.62
  -5   4  -4    1.72    5.48
  -5  -4  -4    1.00    2.61
  -5   4  -4    1.02    3.58
  -5  -4  -4    2.12    3.18
  -5   4  -4   11.43   10.06
  -5  -4  -4    3.75    7.96
  -5   4  -4   -3.23    7.67
  -5  -4  -4    3.51    4.12
  -5   4  -4    3.48    2.61
  -5   4  -4   -1.29    3.61
  -5  -4  -4    6.57    5.91
  -5   4  -4    9.21    5.04
  -5   4  -5   77.09   12.60
  -5  -4  -5  112.55   25.84
  -5   4  -5   80.18   20.86
  -5   4  -5   56.45   11.58
  -5  -4  -5   70.59   11.33
  -5   4  -5   40.75   13.85
  -5  -4  -5   80.67   11.64
  -5   4  -5   64.88   14.17
  -5   4  -5   68.60   10.99
  -5   4  -5   60.16   14.26
  -5   4  -5   54.13   11.74
  -5  -4  -5   88.19   14.42
  -5   4  -6  257.16   27.05
  -5  -4  -6  268.47   27.36
  -5   4  -6  182.44   37.65
  -5  -4  -6  312.04   45.57
  -5   4  -6  176.64   30.69
  -5  -4  -6  341.73   32.17
  -5   4  -6  222.14   28.58
  -5   4  -7    9.53    5.79
  -5   4  -7    3.00    3.54
  -5   4  -7    2.18    6.96
  -5  -4  -7    9.88    3.97
  -5  -4  -7    3.76    3.48
  -5  -4  -7    1.35    5.93
  -5   4  -7    5.68    6.22
  -5   4  -8   25.95    7.83
  -5   4  -8   24.81    6.51
  -5   4  -8   26.99    9.93
  -5  -4  -8   36.96    6.41
  -5  -4  -8   38.91    9.12
  -5   4  -8   31.72    9.34
  -5  -4  -9   19.70    6.19
  -5   4  -9   11.01    5.75
  -5   4  -9   16.99    4.94
  -5   4  -9   16.06    5.90
  -5   4  -9   13.70    7.16
  -5   4 -10   75.69   11.03
  -5   4 -10  101.85   14.36
  -5  -4 -10   96.52   11.68
  -5   4 -11    5.21    3.34
   5  -4  11    5.67    1.98
  -5  -4 -11    6.15    2.47
   5   5 -14    0.62    1.50
  -5  -5  14    2.14    1.82
  -5   5  13  105.91   12.86
   5   5 -13  118.49   13.30
  -5  -5  13  104.54   14.15
  -5  -5  13  106.25   12.90
  -5   5  12  302.65   31.92
  -5  -5  12  360.71   31.98
  -5  -5  12  317.44   34.18
   5   5 -12  339.93   32.21
  -5  -5  12  250.18   30.76
  -5  -5  11  114.49   18.22
  -5   5  11  101.86   14.81
  -5  -5  11   58.08   12.46
  -5  -5  11   90.80   13.26
  -5  -5  11  139.97   19.48
  -5  -5  10  157.44   26.64
  -5   5  10  169.07   26.61
  -5   5  10  326.71   32.13
  -5  -5  10  258.98   33.15
  -5  -5  10  295.05   28.60
  -5  -5  10  384.37   32.07
   5   5 -10  278.92   25.85
  -5  -5   9  285.59   32.64
  -5  -5   9  262.98   28.78
  -5   5   9  280.63   39.90
  -5  -5   9  193.89   28.04
  -5   5   9  215.68   28.78
  -5   5   9  313.33   32.70
  -5  -5   9  265.16   33.82
  -5  -5   9  230.18   28.29
  -5  -5   9  342.65   36.91
  -5  -5   9  294.69   30.37
  -5  -5   8   84.03   17.61
  -5   5   8   73.65   18.67
  -5   5   8   24.83    8.73
  -5  -5   8   37.92    9.58
  -5  -5   8   75.08   14.57
  -5   5   8   88.73   14.63
  -5  -5   8   72.61   17.11
  -5   5   8   84.63   18.61
  -5  -5   8   38.30    9.81
  -5  -5   8  113.10   20.29
  -5  -5   8   89.47   13.13
  -5  -5   7   12.79    7.18
  -5   5   7    9.44    7.47
  -5  -5   7   -1.21    2.88
  -5   5   7   -1.32    3.15
  -5  -5   7   12.90    7.24
  -5   5   7   14.02    8.93
  -5  -5   7    9.51    4.73
  -5  -5   7    8.08    7.57
  -5   5   7    1.28    5.25
  -5  -5   7    1.65    3.51
  -5   5   7    8.50    5.42
  -5   5   6  254.97   30.45
  -5  -5   6  254.81   27.28
  -5  -5   6  218.60   32.30
  -5   5   6  233.59   34.23
  -5   5   6  309.05   30.17
  -5  -5   6  230.14   34.53
  -5  -5   6  287.25   28.41
  -5  -5   6  245.23   33.53
  -5   5   6  183.53   32.23
  -5  -5   6  252.54   27.13
  -5   5   6  177.28   25.94
  -5   5   6  256.99   28.73
  -5   5   6  231.65   28.32
  -5   5   5  306.66   34.68
  -5  -5   5  289.91   32.35
  -5   5   5  297.86   33.40
  -5   5   5  343.26   36.52
  -5  -5   5  333.20   39.28
  -5   5   5  243.32   37.59
  -5   5   5  311.33   32.65
  -5   5   5  282.63   32.95
  -5  -5   5  328.11   40.90
  -5  -5   5  295.13   32.03
  -5  -5   5  305.87   38.80
  -5   5   5  247.30   36.60
  -5   5   5  301.07   32.79
  -5  -5   5  352.93   32.70
  -5   5   5  354.73   35.64
  -5  -5   5  344.19   33.20
  -5   5   4  241.42   31.06
  -5  -5   4  219.26   28.21
  -5  -5   4  236.81   32.77
  -5   5   4  293.72   31.49
  -5   5   4  232.64   27.83
  -5  -5   4  259.22   29.85
  -5   5   4  273.88   31.95
  -5   5   4  307.32   31.39
  -5   5   4  298.48   28.33
  -5   5   4  286.16   29.14
  -5  -5   4  296.87   36.00
  -5   5   4  277.77   29.75
  -5   5   4  252.35   37.37
  -5  -5   4  227.16   28.29
  -5  -5   4  270.93   34.55
  -5   5   4  207.95   30.20
  -5   5   4  327.51   29.93
  -5   5   4  236.47   28.13
  -5  -5   4  267.31   30.31
  -5  -5   4  281.24   28.04
  -5  -5   4  230.47   32.34
  -5   5   4  255.49   28.38
  -5   5   4  302.57   32.24
  -5  -5   4  307.13   29.38
  -5   5   3   11.49    7.56
  -5   5   3   12.99    5.45
  -5   5   3   13.10    5.90
  -5   5   3   17.04    6.15
  -5  -5   3   15.19    6.56
  -5   5   3   24.08    7.41
  -5   5   3   15.41    5.20
  -5  -5   3   18.14    6.11
  -5   5   3   16.52    5.61
  -5   5   3    5.89    3.95
  -5   5   3   18.90    5.53
  -5   5   3   16.61    6.15
  -5  -5   3   12.04    6.69
  -5  -5   3   13.77    7.62
  -5   5   3   10.90    4.92
  -5  -5   3   11.29    5.62
  -5   5   3   16.01   10.26
  -5  -5   3   16.84    5.59
  -5   5   3   17.29    4.72
  -5  -5   3   16.80    5.28
  -5  -5   3   18.64    5.23
  -5   5   3   12.53    4.84
  -5   5   3   16.87    5.70
  -5   5   2  286.64   30.24
  -5   5   2  226.93   24.96
  -5   5   2  194.76   25.50
  -5   5   2  231.83   28.62
  -5   5   2  237.76   25.80
  -5  -5   2  198.18   27.25
  -5   5   2  213.96   25.28
  -5   5   2  250.78   26.57
  -5  -5   2  295.37   26.68
  -5   5   2  183.64   23.27
  -5  -5   2  192.30   26.12
  -5   5   2  233.97   37.79
  -5  -5   2  290.08   25.95
  -5   5   2  228.34   25.44
  -5   5   2  231.41   25.27
  -5  -5   2  283.56   26.96
  -5   5   1   21.85    6.37
  -5   5   1   21.68    8.26
  -5   5   1   24.43    6.20
  -5   5   1   27.08    8.74
  -5   5   1   23.80    6.56
  -5   5   1   22.70    8.09
  -5  -5   1   30.14    7.77
  -5  -5   1   54.05   11.20
  -5  -5   1   20.59    7.07
  -5   5   1   16.58    7.52
  -5  -5   1   38.94   12.76
  -5   5   1   15.30    5.03
  -5  -5   1   38.06    8.12
  -5   5   1   15.71    6.76
  -5  -5   1   18.73    5.79
  -5  -5   1   30.14    6.74
  -5   5   1   10.84    4.79
  -5  -5   1   33.93    7.49
  -5  -5   0   -0.92    2.77
  -5   5   0   -3.24    6.58
  -5   5   0   -1.19    5.21
  -5   5   0    5.74    3.66
  -5   5   0   -1.75    4.16
  -5   5   0   -1.26    3.27
  -5   5   0    4.49    3.44
  -5  -5   0    4.49    3.76
  -5   5   0   -1.64    4.92
  -5   5   0    2.11    2.51
  -5  -5   0    1.22    3.65
  -5  -5   0   -1.64    4.61
  -5  -5   0   -2.57    3.86
  -5  -5   0    1.26    3.28
  -5   5   0    2.05    4.35
  -5   5   0    4.06    8.61
  -5   5   0    0.75    2.53
  -5  -5   0   -1.00    2.60
  -5   5   0    2.38    2.91
  -5   5   0    6.29    3.23
  -5  -5   0    9.24    4.22
  -5   5  -1   18.99    5.03
  -5   5  -1   13.17    7.07
  -5   5  -1   20.70    6.32
  -5   5  -1   16.77    6.06
  -5   5  -1   14.53    5.66
  -5  -5  -1   22.26    6.54
  -5   5  -1   23.18   10.14
  -5   5  -1   10.10    4.58
  -5  -5  -1   19.69    6.24
  -5  -5  -1   13.08    6.91
  -5  -5  -1   26.45   10.24
  -5   5  -1   21.09    8.22
  -5   5  -1   32.98   15.85
  -5  -5  -1   11.04    8.43
  -5   5  -1   24.31    9.22
  -5  -5  -1   30.21    7.34
  -5   5  -1   32.31   10.25
  -5   5  -1   20.56    5.35
  -5   5  -1   18.25    5.08
  -5  -5  -1   25.54    6.20
  -5  -5  -1   31.86    7.13
  -5   5  -1   18.51    5.10
  -5  -5  -2 1469.85  111.43
  -5   5  -2 1260.47  108.93
  -5  -5  -2 1073.10  109.19
  -5   5  -2 1407.05  113.58
  -5  -5  -2 1202.70  111.35
  -5   5  -2 1239.13  109.03
  -5   5  -2 1273.68  109.33
  -5  -5  -2 1379.57  110.30
  -5  -5  -2 1480.29  112.58
  -5   5  -2 1668.10  136.81
  -5  -5  -2 1395.45  123.93
  -5   5  -2 1154.61  117.14
  -5   5  -2  846.55  110.63
  -5  -5  -2 1610.59  128.23
  -5   5  -2 1016.36  116.41
  -5   5  -2 1188.76  108.39
  -5  -5  -2 1200.19  110.49
  -5   5  -2 1239.90  109.23
  -5   5  -3   55.57   12.94
  -5   5  -3   63.47   10.95
  -5   5  -3   68.23   11.17
  -5  -5  -3   64.75   11.73
  -5   5  -3   53.10    9.54
  -5  -5  -3   76.78   11.78
  -5  -5  -3   90.06   20.51
  -5   5  -3   59.22   15.70
  -5  -5  -3   75.38   11.13
  -5  -5  -3   86.22   12.11
  -5   5  -3   71.56   11.24
  -5  -5  -3   58.67   10.99
  -5   5  -3   90.05   21.76
  -5   5  -3   48.98   10.40
  -5   5  -3   82.16   13.68
  -5  -5  -3   77.04   12.05
  -5   5  -3   59.64   10.15
  -5   5  -4   75.94   14.89
  -5   5  -4  101.45   14.45
  -5  -5  -4  107.81   15.04
  -5  -5  -4  116.16   14.91
  -5   5  -4  100.51   14.90
  -5  -5  -4  139.54   16.27
  -5   5  -4   94.68   22.25
  -5   5  -4   90.41   13.42
  -5   5  -4  115.73   19.28
  -5  -5  -4   70.86   13.91
  -5   5  -4   83.31   15.21
  -5  -5  -4  101.88   22.80
  -5   5  -4   79.28   19.42
  -5   5  -5  115.19   18.68
  -5   5  -5  116.41   19.98
  -5  -5  -5  122.76   15.65
  -5   5  -5  125.82   23.73
  -5   5  -5   99.23   16.31
  -5   5  -5   88.57   13.93
  -5   5  -5   89.44   21.11
  -5  -5  -5  142.68   27.27
  -5  -5  -5  155.07   17.99
  -5   5  -5   93.64   14.93
  -5  -5  -5  106.45   14.71
  -5   5  -6  128.62   20.53
  -5   5  -6  143.96   16.78
  -5   5  -6  126.62   25.22
  -5   5  -6   93.99   18.84
  -5  -5  -6  130.43   16.08
  -5  -5  -6  121.99   17.16
  -5   5  -6  106.76   16.27
  -5  -5  -7  187.22   22.91
  -5   5  -7  186.21   23.19
  -5   5  -7  168.46   26.55
  -5   5  -7  193.28   22.45
  -5  -5  -7  231.03   22.71
  -5  -5  -7  204.87   20.96
  -5   5  -8  413.53   41.07
  -5  -5  -8  524.05   40.53
  -5   5  -8  421.26   44.20
  -5   5  -9  137.70   19.30
  -5   5  -9  149.63   21.54
   5  -5  10    2.77    1.58
  -5   5 -10    3.52    3.85
  -5   5 -10   -0.60    2.84
  -5  -5 -10    0.86    2.33
  -5  -5 -11  115.19   12.22
  -5   5 -11  106.23   12.37
   5   6 -14    8.32    1.90
  -5  -6  14    4.95    1.83
   5   6 -13   24.92    4.89
  -5  -6  13   16.43    4.75
  -5  -6  13   17.99    4.43
  -5   6  13   13.08    3.10
  -5   6  12   93.27   12.67
  -5  -6  12  111.82   14.34
  -5  -6  12  121.80   13.90
  -5  -6  12   94.58   15.27
   5   6 -12  125.60   14.84
  -5   6  11  212.81   23.74
  -5  -6  11  220.79   28.31
   5   6 -11  189.31   20.97
  -5  -6  11  200.88   22.36
  -5  -6  11  241.89   23.89
  -5  -6  10   31.62    7.81
  -5  -6  10   14.66    5.15
  -5   6  10   30.64    7.73
  -5  -6  10   27.57    9.17
   5   6 -10   24.58    5.55
  -5  -6  10   27.46    6.83
  -5   6   9    9.81    5.21
  -5  -6   9   16.17    8.53
  -5  -6   9    4.00    4.08
  -5  -6   9   13.55    5.45
  -5  -6   9   11.53    4.78
  -5  -6   8  589.62   51.48
  -5   6   8  479.33   50.37
  -5  -6   8  596.75   52.83
  -5   6   8  694.24   56.10
  -5  -6   8  432.53   53.02
  -5  -6   8  549.13   61.70
  -5  -6   8  519.25   60.47
  -5   6   8  360.35   58.13
  -5  -6   7   86.85   12.34
  -5  -6   7   38.93   12.43
  -5   6   7   63.87   17.13
  -5  -6   7   45.32    8.93
  -5   6   7   36.30    8.48
  -5  -6   7   47.58    9.81
  -5  -6   7   61.51   16.70
  -5   6   7   66.59   12.48
  -5   6   7   58.58   11.27
  -5   6   6  139.60   19.56
  -5  -6   6  133.24   17.20
  -5   6   6  123.92   21.54
  -5   6   6  142.31   18.61
  -5  -6   6  157.29   26.22
  -5  -6   6  154.34   17.69
  -5  -6   6  155.82   23.94
  -5   6   6   56.36   17.68
  -5  -6   6  117.19   15.56
  -5   6   6   85.07   14.73
  -5   6   6  120.96   19.00
  -5   6   6  136.81   18.76
  -5   6   5  113.91   16.90
  -5  -6   5  125.57   16.69
  -5   6   5  133.68   18.77
  -5   6   5  129.67   18.63
  -5   6   5  108.66   15.67
  -5   6   5  143.60   17.83
  -5  -6   5  131.70   23.78
  -5  -6   5   81.68   15.20
  -5  -6   5  110.49   20.46
  -5   6   5   94.88   17.92
  -5   6   5   97.16   14.52
  -5  -6   5  139.84   16.84
  -5   6   4   67.70   13.52
  -5   6   4  114.49   17.01
  -5  -6   4   90.29   14.43
  -5  -6   4  102.84   17.96
  -5   6   4   98.41   14.43
  -5   6   4  126.55   18.05
  -5   6   4  114.07   17.05
  -5   6   4  136.35   17.96
  -5   6   4  108.49   13.48
  -5   6   4  107.81   15.00
  -5   6   4  132.37   16.48
  -5  -6   4  153.09   23.00
  -5  -6   4   87.34   15.40
  -5  -6   4   94.54   18.61
  -5   6   4  122.02   23.65
  -5   6   4  102.45   19.03
  -5   6   4   63.02   12.02
  -5  -6   4   96.95   14.11
  -5   6   3    1.22    4.12
  -5   6   3    5.67    4.36
  -5   6   3   10.66    5.62
  -5   6   3    6.72    3.97
  -5   6   3    3.77    3.90
  -5   6   3    3.20    4.18
  -5  -6   3    1.47    2.75
  -5   6   3    7.01    3.97
  -5  -6   3   15.73    7.54
  -5   6   3   11.38    6.31
  -5   6   3   10.12    4.49
  -5  -6   3    7.87    5.56
  -5   6   3    3.53    7.50
  -5   6   3    6.98    8.30
  -5  -6   3   11.21    4.48
  -5  -6   3    6.68    3.77
  -5   6   3    6.79    3.52
  -5   6   2  486.99   52.14
  -5   6   2  648.41   57.27
  -5  -6   2  507.80   55.64
  -5   6   2  479.12   51.10
  -5   6   2  647.51   54.21
  -5   6   2  523.41   52.23
  -5  -6   2  803.55   61.96
  -5   6   2  460.22   66.70
  -5  -6   2  453.61   53.80
  -5  -6   2  627.02   53.00
  -5   6   2  549.26   52.36
  -5   6   2  512.14   51.00
  -5   6   2  619.35   58.51
  -5  -6   2  560.09   52.03
  -5   6   2  500.33   50.24
  -5   6   1  390.70   39.78
  -5  -6   1  350.41   36.19
  -5   6   1  336.69   40.70
  -5   6   1  326.58   34.27
  -5   6   1  292.69   35.15
  -5   6   1  354.43   39.82
  -5   6   1  363.22   35.91
  -5  -6   1  420.54   39.49
  -5   6   1  339.41   35.66
  -5  -6   1  453.93   42.12
  -5  -6   1  324.75   37.52
  -5   6   1  289.60   49.60
  -5   6   1  323.43   34.92
  -5   6   1  310.02   33.48
  -5  -6   1  342.29   34.89
  -5   6   0  136.27   20.50
  -5  -6   0  154.31   19.61
  -5   6   0  157.68   21.51
  -5   6   0  137.41   17.79
  -5   6   0  133.07   18.79
  -5   6   0  172.34   24.09
  -5  -6   0  183.46   21.03
  -5   6   0  122.84   17.72
  -5  -6   0  168.91   25.85
  -5   6   0  135.75   22.19
  -5  -6   0  161.80   21.29
  -5  -6   0  162.61   18.77
  -5   6   0  142.05   19.68
  -5   6   0  119.63   18.09
  -5  -6   0  230.07   24.99
  -5   6   0  131.90   17.03
  -5   6  -1    2.53    4.06
  -5   6  -1    7.56    6.84
  -5   6  -1    4.98    4.26
  -5  -6  -1    5.63    3.82
  -5  -6  -1    1.67    4.00
  -5   6  -1    6.02    4.79
  -5   6  -1   -5.03    9.26
  -5   6  -1   15.58    6.63
  -5  -6  -1   10.86    5.61
  -5   6  -1   -0.98    5.99
  -5   6  -1    8.88    3.69
  -5  -6  -1   10.20    4.23
  -5   6  -1   10.05    3.81
  -5  -6  -2   14.87    5.85
  -5   6  -2   20.40    8.24
  -5  -6  -2   14.15    6.22
  -5  -6  -2   15.92    5.41
  -5   6  -2   13.61    5.53
  -5   6  -2   11.08    5.41
  -5  -6  -2   10.91    4.62
  -5   6  -2   14.03    4.70
  -5  -6  -2   15.53    5.38
  -5  -6  -2   20.69    6.40
  -5   6  -2    6.24    5.53
  -5   6  -2    9.79   10.45
  -5   6  -2   16.60    4.87
  -5   6  -2   13.07    7.76
  -5   6  -2   13.06    6.35
  -5  -6  -3  622.97   68.03
  -5   6  -3  678.14   65.11
  -5   6  -3  871.92   72.01
  -5  -6  -3  859.81   69.72
  -5  -6  -3  724.23   66.85
  -5  -6  -3  789.16   67.43
  -5   6  -3  851.61   67.41
  -5  -6  -3  769.76   66.38
  -5  -6  -3  902.21   69.65
  -5   6  -3  831.15   90.56
  -5   6  -3  583.79   72.14
  -5   6  -3  465.87   68.62
  -5   6  -3  637.99   73.69
  -5   6  -3  706.86   65.84
  -5   6  -3  604.34   64.95
  -5   6  -3  797.03   67.33
  -5  -6  -4  287.14   28.97
  -5  -6  -4  256.05   27.77
  -5   6  -4  289.61   43.83
  -5  -6  -4  351.03   30.98
  -5   6  -4  211.67   32.39
  -5   6  -4  269.17   28.18
  -5   6  -4  262.22   31.71
  -5  -6  -4  303.74   31.09
  -5  -6  -4  206.95   29.55
  -5   6  -4  242.02   27.54
  -5  -6  -4  279.47   29.11
  -5   6  -4  270.43   29.86
  -5   6  -5  102.08   15.49
  -5  -6  -5   79.22   11.79
  -5  -6  -5   95.43   12.85
  -5   6  -5   74.30   16.22
  -5   6  -5   66.22   10.83
  -5   6  -5   68.02   13.13
  -5   6  -5   53.20   16.93
  -5   6  -5   85.32   12.04
  -5  -6  -5   51.97   12.05
  -5  -6  -6  766.39   65.09
  -5   6  -6  681.25   70.72
  -5   6  -6  690.91   65.08
  -5   6  -6  641.58   67.87
  -5  -6  -6  746.72   65.11
  -5   6  -6  671.83   66.78
  -5  -6  -7  161.89   18.90
  -5  -6  -7  182.41   19.54
  -5   6  -7  157.01   22.63
  -5  -6  -8   44.23    6.83
  -5   6  -8   30.45    8.28
  -5   6  -8   26.55    8.18
   5  -6   8   27.43    5.21
  -5  -6  -9   -0.69    2.82
  -5   6  -9   -0.85    4.24
   5  -6   9   -0.42    1.34
  -5  -6 -10   56.25    7.88
  -5   6 -10   67.28    8.74
  -5   6 -10   65.47    8.56
  -5   6 -11   -0.72    1.84
  -5  -7  13  209.04   18.54
   5   7 -13  217.13   17.18
  -5  -7  13  161.41   16.53
  -5  -7  12  486.89   43.19
  -5  -7  12  504.19   43.95
   5   7 -12  620.32   45.54
  -5  -7  12  607.75   48.08
  -5   7  12  383.49   41.18
   5  -7 -12  463.73   41.48
   5   7 -12  459.51   41.57
  -5  -7  11   -0.83    2.48
  -5  -7  11    0.89    2.50
  -5   7  11    1.92    2.81
   5   7 -11    1.18    1.77
  -5  -7  11    1.55    4.36
  -5  -7  10   44.25    8.52
   5   7 -10   32.83    6.84
  -5  -7  10   50.43    9.12
  -5   7  10   45.16    8.28
  -5  -7  10   41.04   10.66
  -5  -7   9   50.33   14.21
  -5  -7   9   28.14    9.24
  -5   7   9   77.99   11.99
  -5  -7   9   78.83   11.77
  -5  -7   9  103.28   13.13
  -5  -7   8   86.59   20.30
  -5   7   8   80.05   13.51
  -5  -7   8   81.51   13.19
  -5  -7   8   92.25   13.55
  -5  -7   7  444.63   53.38
  -5   7   7  372.89   45.32
  -5  -7   7  499.61   46.19
  -5  -7   7  597.31   60.23
  -5  -7   7  450.94   45.86
  -5   7   7  492.79   47.55
  -5   7   6   31.49    8.35
  -5  -7   6   31.11   12.58
  -5  -7   6   22.68    6.80
  -5   7   6   34.36    8.48
  -5  -7   6   22.59    9.50
  -5   7   6   25.37   10.07
  -5  -7   6   31.06    7.47
  -5  -7   6   26.47    7.00
  -5   7   6   24.28    7.63
  -5  -7   5   52.56    9.69
  -5  -7   5   42.37   10.89
  -5   7   5   60.56   10.91
  -5  -7   5   56.00   14.34
  -5   7   5   36.81   12.94
  -5  -7   5   49.29    9.78
  -5   7   5   49.80    9.98
  -5   7   5   55.31   12.10
  -5   7   5   73.15   12.59
  -5   7   5   54.00   11.07
  -5   7   5   50.45   10.53
  -5   7   4   -1.49    3.88
  -5   7   4    6.58    5.52
  -5  -7   4    5.16    5.17
  -5   7   4    4.73    3.55
  -5  -7   4    1.05    2.74
  -5  -7   4    1.78    4.23
  -5   7   4    2.40    3.37
  -5   7   4    3.15    4.72
  -5   7   4    2.01    8.79
  -5  -7   4    3.50    3.71
  -5  -7   4   -1.16    3.02
  -5   7   4    1.23    4.53
  -5  -7   3  131.79   20.91
  -5   7   3  192.52   25.74
  -5   7   3  160.28   19.73
  -5   7   3  202.87   23.38
  -5   7   3  154.68   19.17
  -5   7   3  173.43   21.31
  -5   7   3  192.87   24.29
  -5   7   3  200.05   22.41
  -5  -7   3  262.92   29.67
  -5  -7   3  113.36   21.75
  -5   7   3  157.63   31.46
  -5  -7   3  182.93   21.03
  -5   7   3  132.35   20.14
  -5   7   3  167.84   21.62
  -5   7   3  176.78   19.87
  -5  -7   3  210.63   21.62
  -5   7   2  121.28   20.03
  -5   7   2   94.18   14.06
  -5   7   2  104.01   15.96
  -5   7   2  113.23   19.09
  -5  -7   2   66.03   16.18
  -5   7   2  112.38   14.98
  -5   7   2  133.28   17.85
  -5   7   2  110.25   16.01
  -5  -7   2  130.12   19.85
  -5   7   2   92.80   26.03
  -5  -7   2  129.49   15.86
  -5   7   2  111.93   16.13
  -5  -7   2  100.66   15.04
  -5   7   2  114.21   14.75
  -5   7   1  291.88   35.11
  -5  -7   1  259.89   30.10
  -5   7   1  250.03   28.07
  -5   7   1  265.76   30.21
  -5   7   1  329.80   35.03
  -5   7   1  247.49   29.62
  -5  -7   1  329.36   33.75
  -5   7   1  225.86   28.96
  -5  -7   1  395.25   36.87
  -5  -7   1  284.43   33.45
  -5   7   1  193.55   43.00
  -5   7   1  259.11   29.95
  -5  -7   1  295.10   29.32
  -5   7   1  265.59   28.24
  -5   7   0   -1.10    4.20
  -5  -7   0    7.88    4.19
  -5   7   0    0.90    3.71
  -5   7   0    6.31    4.02
  -5   7   0   20.18   16.71
  -5   7   0    3.46    3.25
  -5  -7   0   10.92    5.76
  -5   7   0    8.13    8.09
  -5  -7   0    0.99    2.11
  -5   7   0    0.91    3.86
  -5  -7   0    3.43    4.46
  -5  -7  -1   97.20   13.95
  -5   7  -1   73.75   12.84
  -5   7  -1   92.39   14.51
  -5  -7  -1   61.58   14.39
  -5   7  -1   76.54   27.45
  -5   7  -1   53.11   12.09
  -5   7  -1   63.19   14.33
  -5  -7  -1  120.89   15.79
  -5  -7  -1  127.09   14.60
  -5   7  -1  105.70   13.28
  -5   7  -1   89.67   16.23
  -5   7  -1   62.33   11.47
  -5  -7  -1  106.41   16.13
  -5  -7  -2  379.13   33.91
  -5   7  -2  328.19   32.89
  -5  -7  -2  350.31   33.32
  -5  -7  -2  406.55   36.95
  -5   7  -2  197.32   33.35
  -5   7  -2  304.48   54.82
  -5   7  -2  292.15   32.48
  -5   7  -2  346.46   38.42
  -5  -7  -2  330.01   34.51
  -5   7  -2  289.79   32.78
  -5   7  -2  385.09   37.05
  -5  -7  -2  291.04   32.36
  -5   7  -2  343.69   35.91
  -5  -7  -3   27.20    6.68
  -5  -7  -3   28.90    8.02
  -5  -7  -3   26.00    7.30
  -5   7  -3   31.43   17.67
  -5   7  -3   19.27    5.51
  -5   7  -3    9.56    6.34
  -5  -7  -3   14.39    5.27
  -5   7  -3   27.28    6.76
  -5   7  -3   25.08    7.49
  -5   7  -3   25.79    8.93
  -5  -7  -3   26.88    7.21
  -5   7  -4  169.61   33.73
  -5  -7  -4  278.24   34.15
  -5  -7  -4  324.01   32.29
  -5   7  -4  312.19   32.37
  -5  -7  -4  315.71   31.25
  -5  -7  -4  324.43   32.40
  -5   7  -4  365.05   37.39
  -5  -7  -4  351.93   34.47
  -5   7  -4  304.51   31.92
  -5  -7  -4  358.09   33.74
  -5   7  -4  314.64   49.75
  -5   7  -5   24.54    6.59
  -5  -7  -5   27.70    6.80
  -5   7  -5   41.32   10.15
  -5  -7  -5   19.25    6.77
  -5  -7  -5   32.31    8.88
  -5   7  -5   20.37    9.21
  -5   7  -5   30.67    7.21
  -5  -7  -5   36.76    7.47
  -5   7  -6    9.22    7.07
  -5  -7  -6    8.97    3.79
  -5  -7  -6    1.03    3.49
  -5   7  -7  383.57   37.28
  -5  -7  -7  342.22   35.15
  -5   7  -7  383.64   38.90
  -5  -7  -7  399.62   37.18
  -5   7  -8  579.24   55.86
  -5  -7  -8  639.50   55.74
  -5   7  -8  614.51   58.18
  -5  -7  -9   30.39    5.41
  -5   7  -9   34.62    6.90
  -5   7  -9   26.56    5.45
  -5   7 -10  176.95   19.75
  -5  -7 -10  207.33   19.30
   5   8 -13   11.07    2.51
  -5  -8  13    8.68    2.65
   5   8 -12   11.21    2.65
   5   8 -12   13.90    3.99
  -5  -8  12   19.66    5.39
  -5  -8  12   12.72    3.45
   5   8 -11  617.38   56.73
  -5  -8  11  689.38   58.18
  -5  -8  11  628.56   57.74
  -5  -8  10    5.27    3.54
  -5   8  10    6.98    3.36
   5   8 -10    7.81    3.17
  -5  -8  10   10.70    5.65
  -5  -8  10   11.90    4.64
  -5   8   9    9.86    4.38
  -5  -8   9   11.02    5.55
  -5  -8   9   14.30    5.05
   5   8  -9   10.59    3.44
  -5  -8   9   22.53    9.27
  -5  -8   8  174.83   19.68
  -5   8   8  125.10   18.06
  -5   8   7    7.55    7.11
  -5  -8   7   17.02    5.24
  -5  -8   7    7.30    4.36
  -5  -8   7    7.83    7.37
  -5   8   7    8.52    4.73
  -5   8   7   10.59    4.74
  -5  -8   6   40.94    8.06
  -5  -8   6   18.12    6.76
  -5  -8   6   24.78    9.33
  -5   8   6   35.42   10.86
  -5  -8   6   28.67    7.40
  -5   8   6   13.55    5.98
  -5   8   6   28.14    7.71
  -5  -8   5   38.25   10.78
  -5   8   5   69.71   11.71
  -5   8   5   81.49   13.18
  -5  -8   5   69.25   11.24
  -5   8   5   46.36   10.45
  -5   8   5   61.95   11.22
  -5  -8   5   79.23   11.82
  -5   8   5   32.76   13.22
  -5   8   5   55.28   10.70
  -5  -8   5   67.03   10.81
  -5   8   4  118.98   26.66
  -5  -8   4  218.75   24.74
  -5   8   4  226.14   24.87
  -5  -8   4  149.16   24.50
  -5  -8   4  288.97   33.12
  -5   8   4  270.33   26.06
  -5  -8   4  117.07   25.08
  -5   8   4  185.52   31.70
  -5   8   4  190.32   24.12
  -5  -8   4  248.40   25.15
  -5   8   4  246.53   26.60
  -5   8   4  243.27   27.57
  -5  -8   4  240.41   24.36
  -5   8   3  952.83   84.52
  -5   8   3  873.48   81.90
  -5   8   3  944.64   81.78
  -5   8   3  810.54   80.26
  -5  -8   3  723.34   84.45
  -5   8   3  756.19   94.56
  -5   8   3  756.07   79.95
  -5  -8   3  870.49   81.34
  -5  -8   3 1027.98   81.03
  -5  -8   3  867.64   80.09
  -5   8   2   20.12    6.23
  -5   8   2   20.61    7.40
  -5  -8   2   18.08    7.95
  -5   8   2   25.48    7.13
  -5  -8   2   36.47    7.17
  -5   8   2   21.30    5.77
  -5   8   2   41.30    8.38
  -5  -8   2   37.39   10.14
  -5  -8   2   15.62    8.03
  -5   8   2   18.21   13.82
  -5   8   2   15.47   12.13
  -5   8   2   25.73    7.27
  -5   8   2   30.88    8.14
  -5   8   2   30.44    9.69
  -5  -8   1   -1.75    4.54
  -5  -8   1    1.82    4.73
  -5   8   1   -5.35    9.82
  -5  -8   1    4.80    3.22
  -5   8   1   -2.79    3.69
  -5   8   1   -3.73   15.11
  -5   8   1    2.52    2.99
  -5   8   1   -1.24    2.94
  -5   8   1    1.02    3.25
  -5   8   1   13.14    5.81
  -5  -8   1    3.04    3.95
  -5   8   1    2.03    9.65
  -5  -8   0  279.66   31.98
  -5   8   0  255.29   27.44
  -5   8   0  229.62   32.22
  -5  -8   0  242.39   28.76
  -5   8   0  219.69   28.16
  -5  -8   0  266.13   29.66
  -5   8   0  294.62   29.77
  -5   8   0  186.52   25.70
  -5   8   0  305.72   30.56
  -5   8  -1  346.10   36.71
  -5  -8  -1  334.45   33.82
  -5   8  -1  269.34   32.69
  -5  -8  -1  444.19   40.21
  -5  -8  -1  375.31   38.28
  -5   8  -1  248.61   53.63
  -5   8  -1  312.70   34.40
  -5  -8  -1  318.44   35.22
  -5   8  -1  344.97   34.18
  -5  -8  -1  363.16   34.69
  -5  -8  -1  359.44   35.28
  -5   8  -1  346.88   35.21
  -5   8  -1  331.13   38.47
  -5   8  -2  235.01   26.44
  -5  -8  -2  264.16   25.95
  -5   8  -2  250.50   26.07
  -5   8  -2  174.96   42.82
  -5   8  -2  157.93   23.96
  -5   8  -2  211.54   24.99
  -5  -8  -2  309.05   29.05
  -5   8  -2  244.63   31.31
  -5  -8  -2  259.54   28.44
  -5   8  -2  264.31   29.60
  -5   8  -2  279.03   29.47
  -5  -8  -2  250.94   25.68
  -5  -8  -3  415.63   42.25
  -5   8  -3  471.43   45.16
  -5  -8  -3  420.78   40.45
  -5   8  -3  396.56   41.64
  -5  -8  -3  420.52   44.11
  -5   8  -3  439.69   41.39
  -5  -8  -3  456.43   40.47
  -5   8  -3  345.63   40.07
  -5   8  -3  389.00   45.63
  -5  -8  -3  469.05   42.88
  -5   8  -3  398.33   45.38
  -5   8  -3  356.56   61.85
  -5   8  -4  222.37   28.74
  -5  -8  -4  232.87   24.32
  -5   8  -4  142.26   21.87
  -5  -8  -4  227.27   23.53
  -5   8  -4  226.64   24.00
  -5   8  -4  220.04   27.64
  -5  -8  -4  211.78   24.21
  -5  -8  -4  225.21   26.31
  -5  -8  -5    1.80    2.33
  -5  -8  -5   -1.00    3.66
  -5   8  -5    1.80    6.04
  -5  -8  -5   -0.83    3.03
  -5   8  -5    1.98    2.78
  -5  -8  -5    2.46    4.12
  -5   8  -6  106.02   18.07
  -5  -8  -6  112.11   13.99
  -5   8  -6  113.84   15.11
  -5  -8  -6  127.07   15.43
  -5   8  -7  396.06   40.94
  -5  -8  -7  417.95   39.64
  -5   8  -7  481.09   42.00
  -5   8  -7  453.15   43.52
  -5  -8  -7  445.75   41.01
  -5   8  -8   -0.68    2.17
  -5  -8  -8    2.17    2.23
  -5   8  -8    0.95    4.17
   5  -8   9   30.83    6.25
  -5   8  -9   32.83    6.45
  -5  -8  -9   32.32    4.66
  -5  -9  12   31.11    4.86
   5   9 -11  224.10   20.27
  -5  -9  11  211.59   20.48
  -5  -9  11  165.49   19.91
  -5  -9  11  213.31   23.16
  -5  -9  11  227.13   21.49
   5   9 -10  156.37   16.47
  -5  -9  10  146.56   16.49
  -5  -9  10  129.45   16.44
  -5  -9  10  158.97   20.00
  -5  -9  10  160.15   20.34
  -5  -9   9    3.69    3.85
   5   9  -9   14.46    3.98
   5   9  -9   19.55    4.96
  -5  -9   9   14.98    4.56
  -5  -9   9   30.30    9.00
  -5  -9   8  126.69   19.81
  -5   9   8   94.19   12.15
  -5  -9   8   98.07   13.02
   5   9  -8  107.41   12.60
  -5  -9   7 1711.12  134.47
  -5   9   7 1398.31  134.75
  -5   9   7 1506.45  133.23
  -5  -9   6   58.48    9.93
  -5   9   6   47.98   12.82
  -5  -9   6   69.74   10.33
  -5  -9   6   59.14    9.69
  -5   9   6   45.28    9.18
  -5  -9   6   30.34    9.05
  -5  -9   5   -1.40    2.97
  -5  -9   5   -4.29    7.20
  -5   9   5    9.21   11.06
  -5  -9   5   -1.05    2.95
  -5   9   5    1.12    3.36
  -5   9   5    1.05    4.32
  -5  -9   5    3.43    4.82
  -5   9   5    1.14    2.95
  -5  -9   5   -0.99    2.97
  -5  -9   5    1.01    2.85
  -5  -9   4   34.27   10.09
  -5  -9   4   17.24    8.20
  -5   9   4    6.76    4.27
  -5   9   4   19.06   11.50
  -5  -9   4   10.01    4.54
  -5   9   4   22.54    6.83
  -5   9   4   19.57    6.08
  -5   9   4   17.65    5.95
  -5  -9   4   12.68    4.52
  -5  -9   4    7.05    3.99
  -5  -9   3  598.18   51.68
  -5   9   3  467.15   44.46
  -5   9   3  317.04   54.08
  -5  -9   3  435.17   49.12
  -5  -9   3  395.31   43.83
  -5  -9   3  450.48   43.05
  -5   9   3  444.84   44.25
  -5   9   3  547.96   47.00
  -5   9   3  500.82   45.19
  -5  -9   3  305.31   45.46
  -5  -9   2    1.74    4.53
  -5  -9   2   -1.90    5.32
  -5   9   2    1.09    2.59
  -5   9   2   -4.34    7.97
  -5   9   2    1.19    2.83
  -5  -9   2   -0.91    2.73
  -5   9   2    1.31    3.67
  -5  -9   2   -1.64    5.52
  -5   9   2    4.49   10.92
  -5   9   1  400.13   45.62
  -5  -9   1  572.53   50.83
  -5   9   1  469.41   48.52
  -5  -9   1  529.94   51.57
  -5   9   1  361.87   45.74
  -5   9   1  447.38   67.88
  -5  -9   1  546.89   52.83
  -5   9   1  543.09   49.18
  -5   9   1  481.06   54.22
  -5  -9   1  467.49   46.08
  -5   9   1  485.77   46.57
  -5  -9   0   10.95    6.49
  -5  -9   0    9.99    4.71
  -5   9   0    5.84   12.42
  -5   9   0   17.02    4.99
  -5   9   0   20.17   10.87
  -5   9   0   12.70    5.46
  -5   9   0   18.76    6.15
  -5   9   0    1.03    6.80
  -5  -9   0    9.17    4.47
  -5  -9  -1  158.81   19.64
  -5   9  -1  117.66   15.85
  -5  -9  -1   73.83   16.10
  -5   9  -1  199.98   20.52
  -5  -9  -1  108.55   14.79
  -5  -9  -1  145.65   16.59
  -5  -9  -1  110.64   15.27
  -5   9  -1  130.70   16.13
  -5   9  -1  138.31   20.56
  -5   9  -2   33.61    7.42
  -5   9  -2   35.71   10.04
  -5  -9  -2   36.77    7.17
  -5  -9  -2   36.62    8.81
  -5   9  -2   46.18    9.68
  -5   9  -2   34.99   11.33
  -5  -9  -2   36.98    8.56
  -5   9  -3  357.54   35.68
  -5  -9  -3  383.12   34.63
  -5  -9  -3  304.62   32.31
  -5   9  -3  348.39   33.12
  -5  -9  -3  289.87   30.99
  -5   9  -3  305.09   33.22
  -5   9  -3  271.41   36.25
  -5  -9  -3  325.81   33.38
  -5   9  -4   13.87    5.89
  -5  -9  -4   25.33    6.33
  -5   9  -4   19.41    7.83
  -5  -9  -4   14.02    5.01
  -5  -9  -4   21.24    5.22
  -5   9  -4   21.54    5.66
  -5   9  -5   97.80   13.41
  -5  -9  -5   93.40   12.42
  -5  -9  -5  117.03   13.58
  -5  -9  -5  100.06   13.47
  -5  -9  -6   50.80    7.42
  -5   9  -6   48.49    8.41
  -5  -9  -6   50.21    8.07
  -5   9  -7   36.23    8.09
  -5  -9  -7   42.21    6.50
  -5   9  -7   48.91    7.56
  -5  -9  -7   41.00    5.80
   5  -9   7   44.37    8.41
  -5   9  -8   56.50    9.11
  -5  -9  -8   38.37    5.66
   5  -9   8   66.04    8.80
  -5   9  -8   51.75    7.13
  -5   9  -9   54.77    6.71
   5  -9   9   37.71    5.99
  -5   9  -9   41.18    6.06
  -5 -10  11  254.09   27.17
  -5 -10  11  235.06   25.96
   5  10 -11  314.73   26.18
  -5 -10  10    2.23    2.13
  -5 -10  10    1.07    1.96
   5  10 -10   -1.03    2.12
  -5 -10  10    0.91    2.56
  -5 -10  10    0.82    2.74
   5  10 -10   -0.64    2.52
  -5 -10  10    1.79    1.78
  -5 -10   9    2.06    2.31
  -5 -10   9   -0.74    2.08
  -5 -10   9   -0.98    3.30
   5  10  -9    0.98    2.14
  -5 -10   9   -0.59    2.60
   5  10  -9    2.02    2.47
  -5 -10   9    1.28    4.06
  -5 -10   8   13.36    5.78
   5  10  -8   23.58    5.08
  -5 -10   8    8.45    3.53
  -5 -10   8   14.75    4.50
  -5 -10   7    0.79    2.04
  -5 -10   7    1.66    2.49
  -5 -10   6  171.25   19.66
  -5  10   6  178.07   22.83
  -5  10   6  173.03   21.01
  -5  10   6  158.49   20.18
  -5 -10   6  162.40   19.48
  -5 -10   5  249.20   23.42
  -5  10   5  264.79   29.69
  -5 -10   5  136.07   21.22
  -5 -10   5  192.89   25.83
  -5  10   5  233.45   25.21
  -5 -10   5  314.14   31.36
  -5  10   5  199.98   25.22
  -5 -10   4    8.60    7.07
  -5 -10   4    3.36    4.37
  -5  10   4    3.00    3.01
  -5 -10   4    4.17    2.51
  -5  10   4   -1.87    9.50
  -5  10   4   -1.06    2.99
  -5 -10   4    1.95    2.92
  -5  10   4   -1.22    4.11
  -5  10   4   -1.10    6.59
  -5  10   3 1162.24   89.17
  -5 -10   3 1270.45   94.95
  -5 -10   3 1050.60   93.56
  -5 -10   3  924.01   86.46
  -5 -10   3  826.74   87.37
  -5 -10   3  666.86   88.56
  -5  10   3  975.67   89.57
  -5  10   3 1386.42   91.41
  -5  10   3  906.52   88.20
  -5 -10   2  324.53   31.23
  -5  10   2  218.76   25.53
  -5 -10   2  290.71   31.34
  -5 -10   2  162.02   23.24
  -5  10   2  270.02   34.27
  -5 -10   2  191.70   25.71
  -5 -10   2  237.66   28.01
  -5  10   2  237.69   27.32
  -5  10   2  230.88   26.45
  -5  10   1  142.25   23.91
  -5 -10   1  131.86   18.11
  -5  10   1  131.76   18.77
  -5  10   1  130.54   17.43
  -5 -10   1  146.82   20.35
  -5  10   1  142.19   18.33
  -5  10   1  158.60   17.72
  -5 -10   0   -1.42    3.98
  -5  10   0    0.91    3.19
  -5  10   0   -1.70    8.65
  -5  10   0   -0.86    3.04
  -5 -10   0    0.95    2.68
  -5  10   0   -1.23    3.44
  -5  10   0    0.98    3.12
  -5 -10   0    1.39    4.87
  -5 -10   0    1.75    2.93
  -5  10   0   -1.16    2.46
  -5  10  -1 1230.49   95.24
  -5 -10  -1 1231.56   93.45
  -5  10  -1 1283.34   93.10
  -5  10  -1 1143.04   97.30
  -5  10  -1 1110.51   89.93
  -5 -10  -1 1015.08   88.53
  -5 -10  -2    2.74    2.43
  -5 -10  -2    2.20    3.71
  -5  10  -2    9.35    4.81
  -5  10  -2    1.78    5.35
  -5  10  -2    5.37    3.02
  -5 -10  -3  135.77   17.60
  -5 -10  -3  160.74   17.11
  -5  10  -3  181.27   19.26
  -5 -10  -3  149.81   18.68
  -5  10  -3  193.47   21.29
  -5  10  -3  150.30   18.92
  -5  10  -3  178.71   23.57
  -5 -10  -4    0.67    1.88
  -5 -10  -4    1.54    2.01
  -5  10  -4   -1.43    4.29
  -5  10  -4   -0.83    1.96
   5 -10   5  150.90   17.00
  -5 -10  -5  154.35   15.98
  -5 -10  -5  125.81   15.04
  -5  10  -5  146.41   16.57
  -5 -10  -6   31.36    5.23
  -5  10  -6   40.90    6.88
   5 -10   6   46.51    7.49
   5 -10   7  145.38   17.76
  -5  10  -7  214.72   18.64
  -5  10  -8   16.09    4.51
  -5  10  -8   16.65    3.21
  -5 -11  10   11.71    3.58
   5  11 -10   18.32    3.31
  -5 -11   9   14.09    3.45
  -5 -11   9    7.60    3.64
   5  11  -9   11.75    2.78
   5  11  -9   18.78    3.95
  -5 -11   9    5.28    3.85
  -5 -11   9   10.67    2.84
  -5 -11   8    2.91    3.86
   5  11  -8    0.66    2.62
  -5 -11   8    3.16    2.10
  -5  11   8    5.69    2.85
   5  11  -8    1.63    2.24
   5  11  -7  732.50   64.04
  -5  11   7  772.32   64.94
  -5 -11   7  614.85   62.70
  -5 -11   7  879.51   69.49
  -5 -11   6    1.35    4.55
  -5  11   6   11.76    7.07
  -5 -11   6    9.65    5.30
  -5  11   6    9.91    4.30
  -5 -11   6    5.69    2.81
  -5 -11   5   11.71    3.72
  -5 -11   5    6.96    5.42
  -5  11   5    8.76    7.92
  -5 -11   5    9.48    4.81
  -5 -11   5   23.95    7.23
  -5  11   5   14.92    5.15
  -5  11   4   23.30    6.58
  -5 -11   4   12.07    5.70
  -5 -11   4   24.05    7.23
  -5 -11   4   30.02    5.61
  -5 -11   3  302.04   30.59
  -5  11   3  317.46   32.56
  -5  11   3  366.73   34.34
  -5 -11   3  295.31   33.79
  -5 -11   3  281.74   31.41
  -5 -11   3  433.14   37.31
  -5 -11   3  315.22   35.18
  -5 -11   2  226.01   25.22
  -5 -11   2  157.24   20.91
  -5  11   2  240.58   28.78
  -5 -11   2  204.35   22.91
  -5  11   2  239.84   24.07
  -5  11   2  181.94   21.69
  -5 -11   2  254.22   25.41
  -5  11   2  144.94   20.06
  -5 -11   1   75.67   13.44
  -5  11   1   65.79   11.44
  -5  11   1   93.80   13.09
  -5  11   1  101.60   18.10
  -5 -11   1  109.62   13.62
  -5  11   1  114.85   14.99
  -5 -11   1  120.62   13.52
  -5  11   1   86.10   13.13
  -5  11   0   54.66    9.37
  -5  11   0   44.20    7.94
  -5  11   0   62.07   13.74
  -5 -11   0   44.09    9.43
  -5 -11   0   44.17    7.58
  -5  11   0   43.92   11.07
  -5 -11   0   37.50    7.20
  -5 -11   0   56.83   10.24
  -5  11   0   42.03    7.89
  -5 -11  -1   62.70   10.06
  -5  11  -1   50.63   11.46
  -5  11  -1   26.46    6.69
  -5  11  -1   60.70    8.90
  -5 -11  -1   53.83    7.64
  -5  11  -1   37.15    7.25
  -5  11  -1   62.19    9.79
  -5  11  -1   48.94   11.30
  -5  11  -2  209.23   27.22
  -5  11  -2  308.55   28.80
  -5 -11  -2  284.24   26.94
  -5  11  -2  329.40   30.42
  -5  11  -2  315.57   33.36
  -5 -11  -2  305.85   29.47
  -5 -11  -3  160.36   18.46
  -5  11  -3  142.17   18.06
  -5 -11  -3  164.72   17.91
  -5  11  -3  181.93   18.95
  -5  11  -3  192.03   22.79
  -5  11  -3  195.49   20.40
  -5 -11  -4   54.66    7.97
  -5  11  -4   54.63   10.27
  -5 -11  -4   58.43    7.69
  -5  11  -4   52.07    8.24
  -5 -11  -5  166.70   18.14
  -5 -11  -5  180.11   18.00
  -5  11  -5  226.67   20.15
  -5  11  -5  215.03   22.25
  -5  11  -6    3.92    2.27
   5 -11   6    1.38    1.43
  -5  11  -6    3.39    3.34
  -5  11  -7    1.33    2.05
  -5  11  -7    1.72    1.56
  -5  11  -7    2.15    2.79
   5  12  -9    2.58    1.62
  -5 -12   8  382.19   36.08
   5  12  -8  471.98   35.07
  -5  12   8  384.41   34.04
   5  12  -8  399.15   33.85
  -5 -12   7    1.77    2.83
   5  12  -7    3.65    2.88
[truncated: 169,714 more chars]
